# Supplementary material for: The R2R3-MYB transcription factor family in Taxus chinensis: identification, characterization, expression profiling and posttranscriptional regulation analysis
Source: PeerJ. 2020 Feb 17;8:e8473. doi: 10.7717/peerj.8473 (PMC7032060; doi:10.7717/peerj.8473)
Supplement: Supplemental Information 1 [file peerj-08-8473-s008.xlsx]

## Sheet: sheet1
	Tcactin	TcMYB1	Tcactin	TcMYB2	TcMYB3	TcMYB4	TcMYB5	TcMYB6	TcMYB7	TcMYB8	Tcactin	TcMYB9	Tcactin	TcMYB10	Tcactin	TcMYB11	TcMYB12	Tcactin	TcMYB13	TcMYB14	Tcactin	TcMYB15	TcMYB16	Tcactin	TcMYB17	Tcactin	TcMYB18	TcMYB19	Tcactin	TcMYB20	Tcactin	TcMYB21	Tcactin	TcMYB22	Tcactin	TcMYB23	TcMYB24	TcMYB25	Tcactin	TcMYB27	TcMYB28	TcMYB29	Tcactin	TcMYB30	TcMYB31	TcMYB32	TcMYB33	TcMYB34	TcMYB35
Le-1	25.3212	25.5314	26.0148	33.2438	34.7365	33.0989	34.3204	29.7472	35.9766	31.1585	25.548	29.4506	25.4807	31.485	25.548	31.6463	28.6752	24.7456	30.8701	36.5245	23.2269	36.1566	34.8605	25.4807	36.9299	23.2269	30.4488	28.4693	25.548	32.4203	23.2269	30.5848	25.4807	35.901	24.7029	30.2019	38.1491	35.84	24.7029	28.1201	31.2502	28.0377	24.627	33.5184	31.8591	33.7405	28.795	36.8129	30.2348
Le-2	25.6013	25.5374	26.0006	34.22	34.1759	32.5656	33.5157	29.0803	35.4777	31.003	25.331	29.7257	25.2551	31.0172	25.331	31.6683	28.5457	24.7719	30.968	36.4997	23.1743	36.2421	35.5328	25.2551	35.7478	23.1743	30.6304	28.5273	25.331	33.3138	23.1743	30.1848	25.2551	36.2388	24.7474	30.5438	35.9977	36.4441	24.7474	28.5103	31.0885	28.0464	24.7237	33.895	31.9537	34.8696	28.7867	36.6241	30.6932
Le-3	25.4669	25.5046	25.8326	33.461	33.8394	31.8634	33.7352	29.0624	35.7995	30.9766	25.5164	29.2307	25.4715	31.2279	25.5164	31.1472	28.4778	24.9527	30.9732	36.5189	23.1707	34.8888	34.7738	25.4715	36.3388	23.1707	30.5894	28.4734	25.5164	32.5869	23.1707	30.1868	25.4715	36.0699	24.7622	30.7697	40	35.1681	24.7622	28.605	31.1316	28.1056	24.8109	34.2286	31.6809	34.1309	28.9012	38.6231	30.0228
Ph-1	24.7296	26.4379	25.1514	32.0373	35.4777	31.746	31.8202	29.6505	33.7474	29.9687	24.7138	28.0107	24.8464	29.4211	24.7138	30.6566	27.9994	24.6912	30.5128	35.3152	22.7279	32.7893	35.2199	24.8464	38.4485	22.7279	29.8567	28.2277	24.7138	31.6708	22.7279	31.0722	24.8464	0	24.7351	30.8784	35.5823	32.9521	24.7351	28.9728	34.1797	31.4371	25.6905	34.1758	35.3266	33.1481	29.5823	0	31.7789
Ph-2	24.7764	26.4215	24.9724	33.0913	35.754	32.0636	31.3239	29.3486	33.867	30.1101	24.8165	27.9432	24.8473	29.1943	24.8165	30.5048	27.896	24.6217	30.1008	35.1353	22.719	33.0361	35.6284	24.8473	39.2048	22.719	29.7578	28.166	24.8165	32.4636	22.719	30.6654	24.8473	0	24.8057	30.8459	34.6531	32.7463	24.8057	29.0452	35.549	31.4571	25.565	34.5805	36.7745	32.9398	29.5948	0	31.7666
Ph-3	24.7271	26.3304	25.0155	32.6301	35.8584	31.7339	31.4522	29.7296	34.5263	30.0621	25.0238	28.0036	24.7144	29.278	25.0238	30.7052	28.018	24.5677	30.5169	34.7173	22.7495	32.6398	37.7032	24.7144	37.4168	22.7495	29.9404	28.2518	25.0238	31.5323	22.7495	30.7127	24.7144	0	24.722	30.8895	36.9258	32.6859	24.722	29.4372	34.0767	31.5577	25.6636	34.2634	35.84	33.1666	29.3453	0	31.6587
Xy-1	25.7483	25.4338	24.4772	31.2922	30.2485	30.8908	30.1944	28.9329	34.3204	29.9052	25.7153	29.3105	24.1765	30.191	25.7153	31.4153	28.9349	24.8889	29.9234	37.2393	24.0859	38.1647	34.2968	24.1765	37.0325	24.0859	30.7614	29.5816	25.7153	32.8166	24.0859	31.6718	24.1765	39.7878	24.7688	31.8731	35.5866	33.6343	24.7688	30.8276	34.9969	30.6845	24.9779	34.4407	34.0983	33.1864	29.0408	0	31.2856
Xy-2	25.3205	25.4381	24.4947	31.3109	29.971	30.6246	30.039	29.1526	34.7605	29.9009	25.7358	29.1092	24.2307	29.8692	25.7358	31.4371	28.979	24.7737	29.9198	37.1032	24.0944	34.0147	33.8065	24.2307	37.6402	24.0944	30.8274	29.6937	25.7358	33.199	24.0944	31.7523	24.2307	39.9807	24.6563	32.9277	34.524	32.2393	24.6563	30.7666	34.7646	30.5623	25.0008	34.22	33.5484	32.5931	28.8992	0	30.9848
Xy-3	25.5382	25.4172	24.3544	31.432	30.0172	30.6309	30.2895	29.1792	33.8555	29.7516	25.764	29.1151	24.4885	30.0464	25.764	30.9339	29.1072	24.6303	29.9472	36.9889	24.0828	35.1369	33.0974	24.4885	38.2712	24.0828	31.0381	29.6083	25.764	32.329	24.0828	31.4915	24.4885	38.2061	24.272	32.9286	33.6265	32.9472	24.272	30.8108	33.9652	30.6419	24.7967	33.9086	34.3447	33.5858	28.8776	0	31.2738
Rt-1	25.3262	27.4385	23.973	28.5165	30.8081	31.9935	28.5608	28.9195	30.2401	30.0397	24.6387	29.55	25.7617	31.9266	24.6387	31.2673	28.9094	24.974	31.9521	33.9163	22.9531	30.7227	31.8433	25.7617	36.8436	22.9531	30.9009	29.3111	24.6387	30.1595	22.9531	31.8128	25.7617	0	24.8872	31.0061	30.0221	29.0851	24.8872	30.4268	29.6848	32.6183	25.2362	35.84	30.5525	36.1975	30.7833	32.93	32.0654
Rt-2	25.2258	27.5323	23.8163	28.6359	30.7722	31.3273	28.6207	28.8507	30.0092	30.0663	24.5494	29.5624	25.6367	32.5871	24.5494	30.634	28.9999	25.0092	31.8307	34.3384	23.0143	31.0301	32.0515	25.6367	36.0557	23.0143	30.7783	29.2919	24.5494	29.8696	23.0143	31.1579	25.6367	0	24.0196	30.973	30.0605	29.1331	24.0196	30.4926	29.841	32.1183	25.6817	35.3261	30.1508	34.197	31.0291	33.9652	31.9585
Rt-3	24.9676	27.4199	23.9741	28.5397	30.8642	31.8202	28.5479	28.8456	30.0999	30.1058	24.5212	29.4729	25.2883	32.1883	24.5212	30.9497	28.8259	25.5602	32.0765	34.5144	22.944	30.4835	32.0599	25.2883	36.7323	22.944	30.9956	28.981	24.5212	30.2274	22.944	31.6419	25.2883	0	24.4193	30.9549	29.9456	28.915	24.4193	30.4845	29.5671	31.7484	25.2134	35.9747	30.0398	34.2124	30.9647	33.2262	31.4715
[truncated: 53 more columns]
