# Supplementary material for: The R2R3-MYB transcription factor family in Taxus chinensis: identification, characterization, expression profiling and posttranscriptional regulation analysis
Source: PeerJ. 2020 Feb 17;8:e8473. doi: 10.7717/peerj.8473 (PMC7032060; doi:10.7717/peerj.8473)
Supplement: Supplemental Information 2 [file peerj-08-8473-s009.xlsx]

## Sheet: sheet1
	Tcactin	TcMYB1	TcMYB2	TcMYB3	TcMYB4	TcMYB5	TcMYB6	Tcactin	TcMYB7	Tcactin	TcMYB8	Tcactin	TcMYB9	Tcactin	TcMYB10	Tcactin	TcMYB11	TcMYB12	TcMYB13	TcMYB15	Tcactin	TcMYB16	Tcactin	TcMYB18	Tcactin	TcMYB19	TcMYB20	TcMYB21	TcMYB23	Tcactin	TcMYB24	Tcactin	TcMYB25	Tcactin	TcMYB27	Tcactin	TcMYB28	TcMYB29	TcMYB30	TcMYB31	TcMYB32	TcMYB33	Tcactin	TcMYB35	TcMYB36	TcMYB37	TcMYB38	Tcactin	TcMYB39
1Y-1	25.0418	27.3182	32.4989	30.9025	32.8952	31.4659	30.5996	25.1649	35.8664	25.0418	31.7363	25.6577	29.8912	26.9998	31.9791	25.6577	32.0341	30.4606	31.1033	32.8579	25.1649	35.4553	25.6577	32.0414	25.4746	30.0822	33.0931	32.2638	33.5232	26.9998	36.6647	25.1757	33.8594	25.4746	32.7909	25.7147	35.2406	32.4804	36.6054	35.656	33.9303	30.4465	25.664	32.6083	32.666	29.9598	32.0221	25.1757	41.879
1Y-2	25.1476	27.2562	33.043	31.2553	32.7543	31.7733	30.6191	25.0654	35.2875	25.1476	31.4729	25.5965	29.7393	26.0652	31.6041	25.5965	31.7899	30.5377	31.0784	31.9224	25.0654	35.5979	25.5965	31.9097	25.4341	30.2773	32.2898	32.6691	33.0788	26.0652	35.225	25.1798	33.7921	25.4341	33.0303	25.7292	35.6156	32.3126	35.8394	36.543	33.8243	30.4354	25.6275	32.6625	33.5837	29.9829	32.1297	25.1798	41.5007
1Y-3	25.1485	27.2452	32.5212	31.0516	32.8364	31.7783	30.5439	25.1235	38.7796	25.1485	31.5384	25.666	30.0364	26.1289	31.745	25.666	32.1821	30.5665	30.9846	32.3281	25.1235	34.5541	25.666	31.9288	25.5492	30.4891	33.1262	32.6937	33.544	26.1289	36.0448	25.0291	34.1665	25.5492	33.4861	25.781	35.2298	32.1854	36.0242	35.6334	34.0211	30.4929	25.6782	32.673	32.4505	30.1228	31.8213	25.0291	41.6899
2Y-1	25.1533	27.0324	31.9142	30.9162	33.0796	32.0742	30.7944	25.2275	33.5695	25.1533	31.7814	25.67	30.0541	25.4962	32.0894	25.67	31.802	30.2674	31.4807	32.0882	25.2275	35.1254	25.67	31.5341	25.333	30.5151	32.8562	32.8916	32.4953	25.4962	35.3491	25.0298	32.8283	25.333	32.7358	25.5809	36.5546	32.5216	36.1924	35.4692	32.8208	31.0311	25.5174	32.4897	33.4355	30.5295	31.5	25.0298	40.2337
2Y-2	25.266	27.0546	31.9508	30.8996	33.8604	31.9492	30.8909	25.2796	34.2471	25.266	31.795	25.6806	30.0174	25.7867	31.5993	25.6806	32.3455	30.3265	31.185	31.6253	25.2796	34.7048	25.6806	31.8378	25.191	30.8485	32.519	32.8641	32.9155	25.7867	35.6859	25.0655	32.4653	25.191	32.6686	25.5083	36.5632	31.9753	36.536	35.4737	33.3231	31.1102	25.5352	32.4978	32.6406	30.4235	31.3451	25.0655	40.8747
2Y-3	25.2259	27.0559	32.82	30.9482	34.7403	31.8295	30.7707	25.2998	34.7729	25.2259	31.8808	25.6994	30.1618	25.8588	32.2202	25.6994	32.2312	30.5318	31.5218	32.6675	25.2998	33.8526	25.6994	31.7211	25.1895	30.5332	32.7115	32.2961	32.9212	25.8588	36.7314	25.1556	32.2681	25.1895	32.6249	25.703	36.5389	32.1315	37.3189	35.4644	32.3491	31.018	25.446	33.0021	32.9699	30.2986	31.2315	25.1556	41.5157
3Y-1	25.3002	26.9107	32.5181	30.2773	32.2442	32.1851	30.4916	25.7116	33.2252	25.3002	31.0562	25.86	30.1326	26.1559	32.1397	25.86	32.3312	30.7841	31.6332	32.5767	25.7116	34.3086	25.86	31.8602	25.5672	30.5883	32.9896	32.2822	33.489	26.1559	36.8448	25.7322	32.7803	25.5672	32.9773	25.9401	36.755	32.6499	37.1468	35.7905	32.6619	30.6863	25.9926	32.6228	32.7493	30.2583	32.4493	25.7322	37.9646
3Y-2	25.1216	26.8594	32.0313	30.4757	31.8852	31.8774	30.2517	25.5546	33.082	25.1216	31.9111	25.7231	30.2051	25.96	31.6749	25.7231	32.2056	30.5041	31.5376	32.0304	25.5546	34.0403	25.7231	31.8229	25.4426	30.8698	32.5005	32.3078	32.8147	25.96	36.6505	25.8054	32.205	25.4426	32.6454	25.8347	36.9303	32.8304	36.7719	35.6171	32.4969	30.6018	25.7619	32.4575	32.8464	30.083	32.6156	25.8054	37.4439
3Y-3	25.4314	26.8577	32.4658	30.0534	32.7432	32.1212	30.4266	25.6815	33.6861	25.4314	31.4436	25.6166	30.2938	25.6713	31.8172	25.6166	32.748	30.4688	31.6877	32.1216	25.6815	34.4252	25.6166	31.299	25.6415	30.9985	32.745	32.9912	33.0707	25.6713	35.2612	25.7199	32.2767	25.6415	33.4905	25.9763	36.6986	32.6346	36.4932	35.6656	32.9672	30.6522	25.8324	32.259	33.6363	30.0866	31.8147	25.7199	38.2042
4Y-1	24.7681	26.0008	31.0378	30.5069	32.5315	32.7827	29.8286	25.1683	35.1179	24.7681	30.9006	25.7122	29.9246	25.5127	31.6748	25.7122	32.5207	29.7265	31.1392	33.1807	25.1683	33.1463	25.7122	31.4812	25.0505	30.7207	33.2444	31.7909	32.719	25.5127	37.2715	24.695	31.6352	25.0505	32.2609	25.9203	36.6278	32.0242	36.5546	36.2162	34.1019	29.8607	25.6499	32.3079	32.7998	29.4942	33.7316	24.695	39.3216
4Y-2	24.6494	26.0765	31.4596	30.2858	31.9689	32.0749	30.034	25.2716	35.9234	24.6494	30.6558	25.3042	30.0498	25.4983	31.4483	25.3042	32.5259	29.7626	30.9398	32.5816	25.2716	33.2033	25.3042	31.9424	25.0601	30.2017	33.9885	31.8524	33.0534	25.4983	37.2334	24.7493	31.7916	25.0601	32.5231	25.6558	36.5927	32.0393	35.8644	36.5331	34.076	29.9287	25.6322	32.4203	32.8465	29.431	33.0513	24.7493	40.0069
4Y-3	24.5222	26.1175	30.8808	30.1952	31.9279	32.9044	29.8388	25.313	37.0758	24.5222	30.9358	25.5201	29.914	25.498	31.3457	25.5201	32.0844	29.8428	31.2372	32.7376	25.313	34.0533	25.5201	31.5025	24.9434	30.756	32.9199	32.1303	33.6048	25.498	36.4954	24.6992	31.4664	24.9434	32.739	25.7695	35.6592	31.8051	35.6177	36.645	33.7641	29.8517	25.5613	32.8656	33.0784	29.6191	33.321	24.6992	40.6923
			Tcactin	TcMYB1	TcMYB2	TcMYB3	TcMYB4		TcMYB5		TcMYB6		TcMYB8
			25.0418	27.3182	32.4989	30.9025	32.8952		31.4659		30.5996		31.7363
			25.1476	27.2562	33.043	31.2553	32.7543		31.7733		30.6191		31.4729
			25.1485	27.2452	32.5212	31.0516	32.8364		31.7783		30.5439		31.5384
			25.1533	27.0324	31.9142	30.9162	33.0796		32.0742		30.7944		31.7814
			25.266	27.0546	31.9508	30.8996	33.8604		31.9492		30.8909		31.795
			25.2259	27.0559	32.82	30.9482	34.7403		31.8295		30.7707		31.8808
			25.3002	26.9107	32.5181	30.2773	32.2442		32.1851		30.4916		31.0562
			25.1216	26.8594	32.0313	30.4757	31.8852		31.8774		30.2517		31.9111
			25.4314	26.8577	32.4658	30.0534	32.7432		32.1212		30.4266		31.4436
			24.7681	26.0008	31.0378	30.5069	32.5315		32.7827		29.8286		30.9006
			24.6494	26.0765	31.4596	30.2858	31.9689		32.0749		30.034		30.6558
			24.5222	26.1175	30.8808	30.1952	31.9279		32.9044		29.8388		30.9358
[truncated: 43 more columns]
