# Supplementary material for: The R2R3-MYB transcription factor family in Taxus chinensis: identification, characterization, expression profiling and posttranscriptional regulation analysis
Source: PeerJ. 2020 Feb 17;8:e8473. doi: 10.7717/peerj.8473 (PMC7032060; doi:10.7717/peerj.8473)
Supplement: Supplemental Information 3 [file peerj-08-8473-s010.xlsx]

## Sheet: sheet1
Sample Name	5.8sRNA	miR159a	miR828a	miR858
Le	17.613	27.5517	33.7089	32.4039
Le	17.5978	27.4245	34.1855	31.3614
Le	17.6603	27.4802	33.7901	30.9823
Ph	16.9396	25.7208	32.915	32.3965
Ph	16.938	25.6677	32.7429	32.37
Ph	16.9467	25.683	33.2864	32.8981
Xy	17.613	27.4005	0	33.17
Xy	17.6422	27.8098	0	32.7338
Xy	17.6226	27.8549	0	33.6992
Rt	16.9877	28.4385	34.8122	30.3257
Rt	16.8988	28.4028	34.4839	29.902
Rt	16.9078	28.3065	35.4876	30.1687
