# Supplementary material for: The R2R3-MYB transcription factor family in Taxus chinensis: identification, characterization, expression profiling and posttranscriptional regulation analysis
Source: PeerJ. 2020 Feb 17;8:e8473. doi: 10.7717/peerj.8473 (PMC7032060; doi:10.7717/peerj.8473)
Supplement: Table S1 [file peerj-08-8473-s001.xls]

## Sheet: Sheet1
Table S1. Sequence features of R2R3-MYBs in Taxus sp.
Gene name	AA len	pI	Mw (Da)	AA seq	CDS seq
TcMYB1	374	6.14	40206.7	MAEEAQAVAAAERIKGPWSPEEDCTLQRLVEKYGARNWSVISKGIPGRSGKSCRLRWCNQLCPQVEHRPFSPTEDAVIVEAHSLHGNKWATIARLLPGRTDNSIKNHWNSTLRRRYSSEAEDLNNNNIGASLLPLNELTEKSKASSSCRKRSSSFSEGDSQGAEVESREPKRPNLVETPANSENTISFDSNVNFLGSASAGSNLHRPVPRQSAFNCYESIKIPEESTPLGSPSASGSDCSFDPPTLLSLSLPGSASTSENTGGECSPRQEQSYSPQPQANQEPCGYSFVPASGGYLKAEDAMSMMSAAVKAAVARVLPLIFQSGSGSDMNSDFGGGLLSVMREMIAKEVHCYINGLKSSNPGGFVLNSVAPAFR*	ATGGCGGAGGAAGCCCAGGCCGTAGCCGCGGCTGAGCGAATAAAAGGTCCCTGGAGCCCCGAGGAAGACTGCACGCTGCAGAGGCTGGTGGAGAAATACGGCGCGCGTAACTGGTCGGTGATAAGCAAGGGGATACCTGGGCGGTCGGGGAAGTCGTGCAGGCTGAGGTGGTGCAACCAGCTGTGCCCACAGGTGGAGCACCGCCCATTCTCTCCCACAGAGGATGCCGTCATAGTGGAAGCCCACTCCCTCCACGGCAACAAGTGGGCCACAATCGCCCGTCTCCTCCCCGGCCGCACCGACAACTCCATCAAAAATCACTGGAACTCCACCCTCCGCCGCCGCTACTCCAGCGAAGCAGAGGACCTCAACAACAACAATATCGGAGCCTCGCTTCTG…
TcMYB2	285	6.33	32318.2	MSSKWLNLKACDREKLKKGPWTFEEDIRLLRCIKIHGPSRWSALARVSGLQRCGKSCRLRWVNYLRPDLKRGSITPEEERLILDLHARFGNRWSLIAEKIPGRTDNEIKNFWRSRIRKRLPPSQYSDDHEAVLNTSSSNMLAISKSTADHIQFLSPSQTGIHDSERTILPNSAVADSSSAAAAAGNGKLYEQNCELAPAAFNNAEVEPFCAGAKWDEDEEYYRCPWADQDALMPIVYQFYLGNHYTDDISASIVTTMSTDSSDQSNSCLGLEALWNNQFQCNSQY*	ATGAGCTCCAAGTGGTTGAATTTGAAGGCTTGCGACAGAGAAAAACTTAAAAAAGGCCCCTGGACTTTCGAGGAGGATATTCGTCTTCTTCGTTGCATAAAAATCCACGGTCCGAGCCGCTGGAGCGCTTTAGCAAGAGTTTCAGGGCTTCAAAGATGCGGGAAAAGTTGCAGGTTGAGGTGGGTCAATTATCTTCGACCAGATTTGAAGCGTGGCAGCATCACTCCCGAGGAAGAACGTCTCATTTTGGATCTCCACGCTCGTTTCGGCAACAGATGGTCTTTGATCGCAGAAAAGATTCCCGGCCGAACAGACAACGAGATTAAGAATTTCTGGAGATCGCGAATCAGGAAACGTCTTCCGCCATCCCAATATTCCGACGACCACGAAGCGGTGCTT…
TcMYB3	209	5.38	23568.7	MHGHGCWREVPKLAGLLRCGKSCRLRWTNYLRPDLKRGLLSESEEKLIIDLHAAIGNRWSRIAAQLPGRTDNEIKNYWNTRIKKKLRQMGIDPVTHKPIAITHIQMLPKSNANAIEDNETMSMEEQCCLMPSTPAPASADNNNNSSNSCVSLWDEMGVLSSNQPCVDWNDFEWWEGDGDGDGDGVGWIRWSDMETCSTVPLPSSILDQM*	ATGCACGGCCATGGCTGCTGGCGCGAAGTGCCCAAACTTGCAGGGCTGCTTCGATGCGGTAAGAGTTGCAGATTGCGGTGGACAAACTACTTACGACCCGATTTGAAACGTGGACTGCTGTCTGAATCAGAAGAGAAGCTCATCATCGATTTACATGCTGCCATTGGGAACAGGTGGTCGCGAATCGCTGCGCAGTTGCCCGGCAGGACCGACAACGAGATCAAGAACTACTGGAATACCAGGATCAAGAAAAAGCTCCGACAAATGGGAATCGATCCCGTGACTCACAAGCCCATCGCCATCACCCATATACAAATGCTGCCAAAGAGTAATGCCAATGCCATTGAAGACAATGAAACAATGTCAATGGAGGAGCAATGCTGTTTAATGCCATCCACA…
TcMYB4	215	9.13	24173	MFGCDGDSTTTGKMSSTTSDSVAAKDQKSFDGGDVGSGSLKKGPWTSAEDAILVEYVKKHGEGNWNAVQKHSGLYRCGKSCRLRWANHLRPNLKKGAFTAEEEQIIIELHAKLGNKWARMAAQLPGRTDNEIKNYWNTRIKRRQRQGLPLYPPDLHLQQQSNENQQNQQSVNGGDLSQHHHHEFLSGPPSWIFQTSPLTVSILASIHWHTLHFLH*	ATGTTTGGCTGTGATGGTGATTCAACAACCACAGGGAAAATGAGTTCAACGACGAGTGACAGTGTTGCAGCCAAGGATCAGAAATCATTTGATGGAGGGGATGTTGGGAGTGGGTCTCTCAAGAAGGGGCCATGGACATCTGCAGAGGATGCAATTCTGGTTGAGTATGTTAAAAAACATGGCGAGGGTAATTGGAATGCAGTGCAGAAGCATTCTGGCCTGTATCGCTGTGGGAAGAGCTGTAGGTTGAGGTGGGCTAACCATCTCAGACCTAATCTTAAAAAAGGTGCTTTCACTGCAGAGGAGGAGCAGATCATAATTGAGCTTCATGCCAAGCTTGGCAACAAGTGGGCACGCATGGCTGCTCAGCTGCCTGGGCGTACTGATAATGAGATTAAA…
TcMYB5	179	9.71	21208	MENSNAKEVLDSCGQSKLCARGHWRPAEDAKLKELVTKYGPQNWNLIAEKLHGRSGKSCRLRWFNQLDPRINRRPFSEEEEDRLLAAHRLYGNKWAMIARLFPGRTDNAVKNHWHVIMARKYREHSSAYRRRKPQQHQQYLQQHRKENNKAFNIEVNSQYEYSTIPPLSGWFQGCCDTI*	ATGGAGAATTCGAACGCGAAAGAAGTGTTGGATTCCTGCGGGCAATCGAAGTTATGTGCTAGAGGCCACTGGAGGCCCGCGGAGGATGCGAAGCTTAAGGAGCTTGTGACTAAATACGGCCCGCAGAACTGGAATCTCATTGCAGAGAAACTCCATGGGAGATCTGGCAAAAGTTGCAGACTGCGCTGGTTTAACCAGCTCGATCCGAGAATCAACCGCAGGCCTTTCAGCGAGGAGGAAGAAGACCGTCTTCTCGCTGCCCATCGACTGTACGGCAACAAATGGGCCATGATCGCCCGTTTGTTTCCTGGTCGAACCGATAACGCGGTCAAGAATCACTGGCATGTCATCATGGCCAGAAAATACAGAGAGCACTCTTCCGCCTACAGACGAAGAAAA…
TcMYB6	302	7.56	33027.8	MAERIKGPWSPEEDCALKRLVEKYGARNWSVISKGIPGRSGKSCRLRWCNQLCPQVEHRPFSPTEDAVIVEAHSLHGNKWATIARLLPGRTDNSIKNHWNSTLRRRYSGEAEDLNNNNIGASLLPLNELTEKSKASSSSRKRSSSFIDGDSEGAEIESRGLKRLNLIDSPKNSEKTSKDISNATFMPPAGPGFSSHRPVSRQPALDCLDSLKSPEEALDLCSPTVSGSDCSLDPPTLLSLSLPGSAYTSENNGGECSPRQEQSISPGPLKLQADQQAFGYSFAPETALHESGGRYVYDVRRC*	ATGGCGGAGCGGATAAAAGGTCCCTGGAGCCCCGAGGAAGACTGCGCGCTGAAGAGGCTGGTGGAGAAATATGGCGCGCGTAACTGGTCGGTGATAAGCAAGGGGATACCTGGGCGGTCGGGGAAGTCGTGCAGGCTGAGGTGGTGCAACCAGCTGTGCCCACAGGTGGAGCACCGCCCATTCTCTCCCACAGAGGATGCCGTCATAGTGGAAGCCCACTCCCTCCACGGCAACAAGTGGGCCACAATCGCTCGTCTCCTCCCCGGCCGCACCGACAACTCCATCAAAAATCACTGGAACTCCACCCTCCGCCGCCGCTACTCCGGCGAAGCAGAGGACCTCAACAACAACAATATCGGAGCCTCGCTTCTGCCTTTGAACGAATTAACAGAGAAAAGT…
TcMYB7	179	9.89	20647.2	MGRTHLPKCNTHVNISETLFLGCAGKSCRLRWFNQLDPRINRRPFTEEEEDRLLAAHRLYGNKWAMIARLFPGRTDNSVKNHWHVIMARKYREQSNVYGRRKPSQVQRSRQKYGSSSQHGPGLSNNNEASHCVGAACWVDHDDERCAGYSNLQQRINGNMYGAVQPRNFFEGKSTKNLL*	ATGGGCAGGACCCATCTGCCAAAATGTAATACCCATGTCAATATTAGTGAAACCTTGTTTTTGGGTTGTGCAGGAAAAAGTTGCAGGCTTAGGTGGTTTAATCAGCTGGACCCAAGAATAAACAGAAGGCCTTTTACTGAAGAAGAGGAAGACAGACTGCTTGCAGCTCATCGGTTATATGGTAACAAATGGGCTATGATTGCCCGTTTATTCCCCGGACGAACTGATAACTCTGTTAAGAATCATTGGCATGTTATCATGGCCAGGAAATATAGAGAGCAGTCCAATGTTTATGGGAGAAGAAAGCCCAGCCAAGTACAGAGATCAAGACAGAAATATGGCTCTTCTTCTCAGCATGGTCCTGGTCTTAGTAACAATAATGAGGCGAGTCACTGTGTG…
TcMYB8	878	6.26	96512.9	MRIELGRGKARRAEMEVEQEQGSAQAETAKTTAELDRAVVAVMLKPKKGRPRKDKEHVLEQGQQMRMDYGQGVELGKEELEGTGVHRDGGSSAKNDKNNGASCSSQSVESLDIDSPVKGLPPVKGPTGGPQGRSSKGGWTEEEDEILRRAVQCYNGKNWKRIAQYFPNRTDVQCLHRWQKVINPNLIKGPWTKEEDNKIVELVQKYGVKKWSFISQFLPGRIGKQCRERWFNHLNPEIKKDAWSQEEELALIRAHQVYGNKWAEIAKYLPGRTDNAIKNHWHSSAKRKIASYLASGLLAELPELPGFDLPMVSFSGVEVSTPMPASGPFMEELSNFNLQSPCKRTNLPVSVDRAVTAEQCGHKRSDMHKTTDTWKLGNRLDNLFNTTLSPISKADYCML…	ATGAGAATTGAGCTGGGAAGGGGAAAGGCAAGGAGAGCAGAGATGGAGGTGGAACAGGAGCAGGGGTCTGCACAAGCAGAGACAGCGAAAACAACAGCTGAATTGGACAGGGCAGTAGTAGCAGTGATGCTGAAGCCGAAGAAAGGAAGGCCGAGGAAGGATAAAGAGCATGTGTTAGAGCAGGGGCAGCAAATGAGAATGGATTATGGACAGGGAGTGGAATTGGGGAAAGAAGAATTGGAAGGGACAGGTGTGCATAGAGATGGTGGAAGTAGTGCTAAGAATGATAAAAATAATGGAGCTTCATGTTCTTCTCAGTCTGTGGAGAGTCTTGACATTGACAGTCCTGTGAAGGGGTTGCCTCCGGTTAAAGGTCCGACAGGTGGTCCTCAAGGGCGT…
TcMYB9	534	8.76	60571	MKERQRWQPEEDAVLRAYVKQYGPKEWNLVSQRTGKHLDRDAKSCLERWKNYLKPGIKKGSLSEEEQSLVITLQAKYGNKWKKIAAEVPGRTAKRLGKWWEVFKEKQLKEKRKERQSLDSQCLREGGKYDHILETFAEKYVQKKICPTSLPLLLMPSPSPSSFLTLSVPTDGTYADNFHLTNVNSMPSVSSSKCVSEMPNLPGSLGLTLPDLKRKLSSVTELEPQLTLERLSRTRCTLEPELALHCSVSAMDMELTSTSLGTPCSAIDTTSSLPPWMSNVPSAPVPVSGSSDVKTTASAFNLERENPFLSKSIQLNSSPSVSLSLSPSLSDPVVSSGSASPASEVIASRSWLQDATRNKEIINGISGGSANENKLNLPQFSSDKQVGILSFDPNLSYGK…	ATGAAGGAGCGGCAGCGGTGGCAGCCTGAAGAAGATGCTGTATTACGGGCTTATGTTAAGCAATATGGACCAAAGGAATGGAACTTGGTATCACAGCGGACGGGTAAACACCTAGACAGGGATGCAAAGTCCTGTTTGGAGAGGTGGAAAAATTATTTAAAACCTGGGATTAAAAAAGGTTCTTTATCAGAAGAAGAGCAATCTCTGGTTATAACTCTTCAGGCAAAGTATGGTAATAAGTGGAAGAAAATTGCAGCAGAAGTTCCAGGAAGAACAGCCAAGAGATTAGGAAAATGGTGGGAGGTTTTCAAAGAAAAACAACTGAAGGAAAAACGTAAAGAAAGGCAAAGTTTAGACAGTCAATGTTTGAGGGAAGGGGGCAAGTATGATCATATTTTG…
TcMYB10	317	5.59	35506.6	MEAESGWKGGSGAFEVPWSPEEDYALRTRVEELGDRNWSLISEGIPGRSGQSCLWRWCYFLSHERKRLPIPAAVDYTILPAHSHPGRNDIANKKYRTLEKKPMKLISKEASAILSSECSSDLTQSNDTVRAAAATVTLDEFCDLSLETGSDNPSDPMFDNFGHKADNFSNPGESCNEDMPLLTLFPLKPQEFWPSPPSTPLIQLFPQEGFGESGGRRRRKRLRRRDQQLPQHDTDGEVFDHLAEEAEKLLSYVSGNDVGLYKRMVGNTHSTSCHRSSYEVAGDSNPFFARRKLEGLRTGFLTAATELVMSARPMTES*	ATGGAAGCAGAATCGGGGTGGAAGGGCGGCAGCGGCGCATTCGAAGTCCCTTGGAGCCCCGAAGAAGACTACGCGCTGCGGACGCGGGTGGAGGAACTCGGTGATCGCAACTGGTCATTGATAAGCGAGGGCATCCCTGGGCGGTCGGGACAATCGTGTCTGTGGAGATGGTGCTATTTTCTGAGCCACGAGAGGAAGCGTCTTCCCATTCCTGCCGCAGTGGATTACACCATTTTACCAGCCCACTCCCATCCTGGCCGTAACGACATCGCCAACAAAAAATACCGCACTTTGGAAAAGAAGCCAATGAAATTAATAAGTAAAGAAGCATCGGCTATCTTGTCCAGTGAATGCTCCAGCGACTTAACTCAAAGCAATGATACAGTTCGAGCAGCTGCA…
TcMYB11	663	5.86	73137.1	MTDDDDALGELPPVRGRIGGPTRRSSKGGWTPEEDETLRRAVQCFKGKHWKKIAEFFPDRTDVQCLHRWQKVLNPELIKGPWTKEEDESIVELVNRHGAKKWSAIAKNLPGRIGKQCRERWHNHLNPAINKDAWTREEEFALIRAHQIYGNKWAELAKYLPGRTDNAIKNHWNSSIKKKLDSYLVSALGTQFPDFSVSQPMLMHTLSKAEEFSNVNGGAEMEEISECSQDSISTFCCRTGSLEVPTTASMQIECEKSESQKVTAKTNSDNDSNNLLGPLLSKCSKTENASLIRVGDPSHFHPPVSTARLAVSSCEMNELTESVITGSSCSLGSPKEVSKTIDIFTSGSLGVPVSFVSEAVKSAPSREDKILSSNVYTSQLANSTNMAGMPHSLRESAFP…	ATGACAGATGATGATGATGCTTTGGGCGAATTGCCTCCTGTTCGCGGGCGCATAGGAGGTCCTACAAGGCGGTCATCCAAGGGTGGATGGACACCCGAAGAGGATGAAACGTTGAGAAGAGCTGTTCAGTGTTTCAAGGGAAAGCATTGGAAGAAAATAGCTGAATTTTTTCCTGATCGCACGGACGTTCAATGCTTGCATCGTTGGCAGAAGGTTCTTAATCCAGAACTTATAAAGGGACCTTGGACAAAAGAGGAAGATGAAAGTATAGTTGAGCTTGTAAATAGGCATGGGGCAAAAAAATGGTCTGCTATTGCAAAAAATTTGCCAGGGCGTATTGGAAAGCAATGTCGAGAGAGGTGGCACAATCATCTAAATCCAGCAATAAACAAAGATGCA…
TcMYB12	460	9.32	52683.5	MRIMIKGGVWKNTEDEILKAAVMKYGKNQWARISSLLVRKSAKQCKARWYEWLDPSIKKTEWTREEDEKLLHLAKLMPTQWRTIAPIVGRTPSQCLERYEKLLDAACVKDENYEPADDPRKLRPGEIDPNPESKPARPDPVDMDEDEKEMLSEARARLANTRGKKAKRKAREKQLEEARRLASLQKRRELKAAGIEGKQRKRKRKGIDYNAEIPFEKKPPPGFFDVADEGRQVEQPQFPTTIEELEGKRRVDIEAQLRKQDVARNKIVQRHDTPSAVMQVNKLNDPEVVRKRSKLMLPAPQISDRELEEIAKMGYASDLILGEDELAEGSSAARDLLANYNQTPRLGTTPLRTPQRTPGGKGDAIMMEAENQARLREAQTPLFGGENPELHPSDFSGVT…	ATGAGGATTATGATAAAGGGAGGTGTTTGGAAAAACACCGAAGATGAAATTTTGAAGGCAGCTGTTATGAAATATGGGAAGAATCAATGGGCGCGTATTTCTTCACTTCTTGTTCGGAAATCGGCAAAGCAGTGCAAAGCCCGGTGGTATGAGTGGCTTGATCCTTCTATTAAAAAGACAGAGTGGACAAGAGAAGAGGATGAGAAGCTCCTTCATCTGGCAAAGCTTATGCCCACACAGTGGAGAACGATTGCCCCGATTGTTGGACGCACTCCATCTCAGTGCCTGGAACGTTATGAGAAACTTTTGGATGCAGCATGTGTGAAGGATGAAAACTACGAACCTGCTGATGATCCTCGTAAGTTGAGGCCTGGAGAAATAGATCCTAATCCGGAATCA…
TcMYB13	424	8.97	46359.6	MVFLCGFLFPPPPPPASYPVVVVSPLLLMVGKGGGGSLKKGPWTSSEDAVLVDYVNKHGEGNWNALHKYSGLRRCGKSCRLRWANHLRPNLKKSAFIPEEERAILELHAKLGNKWARMAAQLPGRTDNEIKNYWNTRLKRRQRAGLPLYPPDIMLHDANQYTPTQPKVADPPHDHPLLNSKTVTSSSIRFDGLNHIAMTCNPFSGLSEISGGSVLNNPNQRLKRLGDGSFVQPSSISSFNDIKNTQACFNRTPTYPQPAIWDLFSAQAFPYDPDPSSTRMSAFGEALVGSHALVNGIFSASGPLPGLKLELPSSQFAESVTTTGLSTVVPNVNDPFAQYPLTAHLPKQTDSFLSPNYSGLLESLLHEAQGMSGINSLSSSGSSSELTSFIVNGFFPSIQ…	ATGGTATTTTTGTGTGGTTTTTTGTTCCCCCCCCCCCCCCCCCCCGCGTCGTACCCGGTTGTGGTCGTTTCTCCTTTGCTACTAATGGTGGGCAAAGGAGGAGGTGGAAGCCTGAAGAAGGGGCCATGGACTTCTTCAGAGGATGCAGTTCTTGTGGACTATGTTAACAAACACGGGGAAGGCAACTGGAATGCTTTGCACAAGTACTCTGGTCTGCGTCGTTGTGGAAAGAGTTGCAGGCTGAGGTGGGCTAATCATCTCAGACCTAATTTGAAGAAGAGCGCCTTCATTCCAGAAGAGGAGCGCGCCATTTTGGAGCTCCACGCCAAGCTCGGCAACAAATGGGCTCGTATGGCTGCTCAGCTCCCTGGGAGAACAGACAATGAGATAAAGAACTAC…
TcMYB14	273	5.74	30986.9	MGRRPCCDKVGLKKGPWTAEEDKKLVNFIANNGHCCWRLLPKLAGLLRCGKSCRLRWTNYLRPDLKRGVLSPSDEKLIIDLHARMGNRWSKIASHLPGRTDNEIKNYWNTYIKKKLMRMGIDPVTHLPLSESPQLSQQDNNSAGAKDFCVDQAETQKQILHEKSSEITISNSAPQQEEPDQSNSFSSAEIPCKMEESQSIQSWWEYSDIAAADYFENSEYGITWFDPESNMGSVFESPGLIPPSSDFYNTHLFLQDNINSFPPWEIQPAGSGL*	ATGGGAAGAAGGCCGTGCTGTGACAAGGTTGGTTTGAAGAAAGGACCGTGGACTGCGGAGGAAGATAAAAAGCTCGTTAATTTCATTGCCAACAATGGCCACTGTTGCTGGCGTCTCCTTCCCAAGCTTGCTGGGTTGCTGAGATGTGGAAAGAGTTGTAGGCTGAGATGGACAAATTATCTTCGCCCCGATCTGAAAAGGGGCGTCCTCTCCCCGTCAGATGAGAAGCTCATTATCGACCTTCATGCTCGCATGGGTAACAGGTGGTCGAAGATTGCATCTCATTTGCCAGGGCGCACAGACAACGAGATAAAAAACTACTGGAACACCTACATAAAAAAGAAGCTGATGCGCATGGGAATCGACCCCGTGACGCACCTCCCTCTTTCAGAATCGCCG…
TcMYB15	382	8.16	42335.9	MGKCKCSTRKAATVRGFQTIGGAGGGGGHNNSMGLNQMGSDDTEEVENCEDGVQSRLCARGHWRPAEDAKLKELVTQCGPQNWNIIAEKLQGRSGKSCRLRWFNQLDPRINRRPFTEEEEDRLLAAHRLYGNKWAMIARLFPGRTDNSVKNHWHVIMARKYREQSNVYGRRKPSQVQRSRQKYGSSSQHGPGLSNNNEASHCVGAACWVDHDDERCAGYSNLQQRINGNMYGAVQPRNFFEGGNKRGVDMLGCNLDNYHAMASQMEAGESSSPSQVTTDSCAAVSFLRQGAKRSFSSVDMTHFSLGNTNNKHQDLQYGCADSSNSELTVVEAPCVDNSSTTLRNSSFLKAPRSLVSEEELEEDNDFKKPNACFIDFLGVGTT*	ATGGGAAAATGCAAATGCAGTACTCGGAAAGCAGCAACAGTACGAGGTTTCCAAACCATCGGGGGGGCTGGTGGTGGTGGTGGTCATAACAACAGCATGGGACTGAACCAAATGGGTTCAGATGATACAGAAGAAGTGGAGAATTGTGAAGATGGCGTTCAGTCTAGGCTGTGTGCCAGAGGCCATTGGAGGCCTGCAGAAGATGCCAAGCTCAAGGAATTGGTGACACAGTGTGGCCCCCAAAACTGGAACATTATTGCAGAAAAACTTCAAGGAAGATCAGGAAAAAGTTGCAGGCTTAGGTGGTTTAATCAGCTGGACCCAAGAATAAACAGAAGGCCTTTTACTGAAGAAGAGGAAGACAGACTGCTTGCAGCTCATCGGTTATATGGTAACAAA…
TcMYB16	390	5.03	43712.9	MGRQPCCDKVGLKKGPWTAEEDQKLIAFILNNGHCCWRAVPKLAGLLRCGKSCRLRWTNYLRPDLKRGVLSDSEEQLIIELHSYLGNRWSKIASHLPGRTDNEIKNYWNTHIKKKLKRIGIDPVTHRPITDQVPDTNPPGESNNTFLRASNTEEYLAPKLDLNSHNTNEKLRTFNNDNDAKEASTRSNDSEVTEEEKSIDSMTEAAQLSVPGGYGFDPRVELLATAEPQNFENFAATSPCFDFLNGNAMLFQQQGSPLLRVPDEECLLEFSEDIIGCANAQEGESSDQLIKDEFSVNSCLSSFNYSGETQAPICSSATEMQWTHDMLVTGSILPAPETDMQASLWQEQPEDAFPGWDGDILHHGINVANCCFSNPFTKKKENLGQIKLQR*	ATGGGGAGACAGCCCTGCTGTGACAAGGTTGGATTGAAGAAAGGGCCCTGGACTGCAGAAGAGGACCAGAAGCTCATTGCTTTTATCCTCAACAATGGCCATTGCTGCTGGCGGGCTGTTCCCAAACTTGCTGGTCTGCTTAGATGTGGTAAGAGCTGCAGATTGAGATGGACAAACTACCTCAGGCCTGACTTGAAACGAGGAGTTTTATCTGATTCTGAAGAGCAGCTCATCATTGAGCTTCACTCCTACCTTGGCAACAGATGGTCCAAGATTGCTTCACATTTGCCTGGGCGTACTGACAATGAGATAAAGAATTACTGGAACACCCACATCAAGAAAAAGCTCAAACGCATAGGAATCGATCCCGTGACCCACCGGCCGATCACCGATCAAGTA…
TcMYB17	286	5.76	32095	MNSKWSRCAEKGKLKKGPWTFEEDIRLLRYIRAHGDGRWTTLAKAAGLQRCGKSCRLRWVNYLRPGIKRGNITAEEERVIIDLHSRWGNRWSLIAERIPGRTDNEIKNYWRSHLKKKLQNSGDQNSDVSQVQAKQVSLPPQQSFEVFIGEAIEPYQYNYSTETMKTDIDNVQSCTQTSFSSSSQVEACFENEIGMSIAGQSANANELSPMLNSFPSGIPIESDATAIFDASPYNPANGSELYGAEGCDSDTGADIMLWNMCPIPIPNMEMDTPFVSATPFRSFNAI*	ATGAATTCGAAATGGTCTCGTTGTGCGGAAAAAGGAAAGCTAAAGAAGGGGCCATGGACGTTTGAGGAGGATATTCGTCTTCTACGCTACATTAGAGCTCACGGTGATGGCCGATGGACCACTTTAGCAAAGGCAGCAGGGCTGCAGAGATGCGGAAAAAGCTGCAGGCTAAGGTGGGTAAACTATTTACGGCCAGGGATTAAGCGCGGCAATATTACTGCCGAGGAAGAACGCGTCATAATTGACCTTCATTCGCGCTGGGGAAACAGATGGTCGTTGATAGCAGAAAGGATTCCAGGCCGAACGGATAACGAGATAAAAAACTATTGGAGGTCTCATCTGAAAAAGAAGCTTCAAAACTCCGGCGATCAAAACTCTGATGTGTCACAGGTGCAAGCT…
TcMYB18	511	6.67	55285.7	MVGKGGGGSLKKGPWTSSEDAVLVDYVNKHGEGNWNALHKYSGLRRCGKSCRLRWANHLRPNLKKSAFIPEEERAILELHAKLGNKWARMAAQLPGRTDNEIKNYWNTRLKRRQRAGLPLYPPDIMLHDANQYTPTQPKVADPPHDHPLLNSKTVTSSSIRFDGLNHIAMTCNPFSGLSEISGGSVLNNPNQRLKRLGDGSFVQPSSISSFNDIKNTQACFNRTPTYPQPAIWDLFSAQAFPYDPDPSSTRMSAFGEALVGSHALVNGIFSASGPLPGLKLELPSSQFAESVTTTGLSTVVPNVNDPFAQYPLTAHLPKQTDSFLSPNYSGLLESLLHEAQGMSGINSLSSSGSSSELTSFIVNGFFPSQSKLKCGVNSDPATPLNGTASSGFSENTPT…	ATGGTGGGCAAAGGAGGAGGTGGAAGCCTGAAGAAGGGGCCATGGACTTCTTCAGAGGATGCAGTTCTTGTGGACTATGTTAACAAACACGGGGAAGGCAACTGGAATGCTTTGCACAAGTACTCTGGTCTGCGTCGTTGTGGAAAGAGTTGCAGGCTGAGGTGGGCTAATCATCTCAGACCTAATTTGAAGAAGAGCGCCTTCATTCCAGAAGAGGAGCGCGCCATTTTGGAGCTCCACGCCAAGCTCGGCAACAAATGGGCTCGTATGGCTGCTCAGCTCCCTGGGAGAACAGACAATGAGATAAAGAACTACTGGAACACCCGTTTGAAGAGAAGACAAAGAGCGGGCTTGCCGCTTTATCCTCCTGATATAATGCTACACGACGCAAATCAGTAT…
TcMYB19	467	8.57	51665.9	MKSGNGNGDERIKGPWSPEEDAILSRLVDKFGARNWSLIARGIPGRSGKSCRLRWCNQLNPGVKRKPFTGVISWTTLHGVLFKMYSATFTTSAQYRKDEEDRAIVAAHAIHGNKWASIARMLQGRTDNAIKNHWNSTLRRKYLGIDKWKKELSSSGSEKVKEEYSDMETNNLVRDEESADGVVNSLKTGEDRGEVGSSVLIYPKAVLENMPDKVDDTNRKGGNQDNNGHIQAAEHKPDAKINDNLIRPTPRLSAFTRYSPVANKIKFSGRSMENNVNVSGITPRETPFTHSPTHDKPDYSCLTSCGAPIFPNSLCVDIFPGVPSHCGRGCCGTQAQRYENSHHTQDSLLGPEYVEFSDDSLASCNNFLNSFCLNRMGGVGSASSESSMEKSSSVALHTT…	ATGAAGAGTGGTAATGGTAATGGAGATGAGCGCATAAAGGGACCGTGGTCGCCAGAGGAGGATGCCATTCTGAGCAGGCTGGTGGACAAATTTGGAGCTCGCAATTGGAGTCTGATAGCGAGGGGCATTCCTGGTCGCTCTGGGAAGTCGTGCCGCCTTCGCTGGTGTAATCAGCTCAACCCCGGGGTCAAACGCAAGCCTTTCACTGGagtGATATCTTGGACAACTTTACATGGAGTTCTATTTAAGATGTATAGTGCAACATTTACAACTTCTGCTCAATACCGAAAAGATGAAGAAGATCGAGCAATTGTTGCTGCCCATGCAATTCATGGAAATAAATGGGCATCCATTGCAAGGATGCTCCAAGGGAGAACCGACAATGCAATCAAGAACCAC…
TcMYB20	391	6.2	43489.9	MCQTQEEGATGSWIQPDNGFNDSVMHPNTRIPPQTGQNLVPYFEASEEALMLQNNNNLYGKMQMQYSESSNSKRVPNHGGGGGGGHNNSMGLNQMGSDDTEEVENCEDGVQSRLCARGHWRPAEDAKLKELVTQCGPQNWNIIAEKLQGRSGKSCRLRWFNQLDPRINRRPFTEEEEDRLLAAHRLYGNKWAMIARLFPGRTDNSVKNHWHVIMARKYREQSNVYGRRKPSQVQRSRQKYGSSSQHGPGLSNNNEASHCVGAACWVDHAMASQMEAGESSSPSQVTTDSCAAVSFLRQGAKRSFSSVDMTHFSLGNTNNKHQDLQYGCADSSNSELTVVEAPCVDNSSTTLRNSSFLKAPRSLVSEEELEEDNDFKKPNACFIDFLGVGTT*	ATGTGTCAAACACAAGAGGAAGGAGCCACCGGAAGCTGGATTCAACCAGATAATGGTTTCAATGATTCTGTTATGCATCCCAATACCAGAATTCCACCACAGACTGGGCAGAATTTGGTTCCATATTTTGAAGCATCAGAGGAAGCTTTGATGTTACAAAATAATAACAATCTCTATGGGAAAATGCAAATGCAGTACTCGGAAAGCAGCAACAGTAAGAGGGTTCCAAACCATGGGGGTGGTGGTGGTGGTGGTCATAACAACAGCATGGGACTGAACCAAATGGGTTCAGATGATACAGAAGAAGTGGAGAATTGTGAAGATGGCGTTCAGTCTAGGCTGTGTGCCAGAGGCCATTGGAGGCCTGCAGAAGATGCCAAGCTCAAGGAATTGGTGACA…
TcMYB21	431	8.96	46776.3	MFGCDGDSTTTGKMSSTTSDSVAAKDQKSFDGGDVGSGSLKKGPWTSAEDAILVEYVKKHGEGNWNAVQKHSGLYRCGKSCRLRWANHLRPNLKKGAFTAEEEQIIIELHAKLGNKWARMAAQLPGRTDNEIKNYWNTRIKRRQRQGLPLYPPDLHLQQQSNENQQNQQSVNGGDLSQHHHHEFLSGSSKLDIPNVTFDSLNPGQHSLAYSSFPALTEASMSSILNQGMGSSQNYNLMNPIQRAKRLREAESLMSFGAGVGVGGGGGIFSFAQMGENNKSVVESCFKAARRPYGQPGRLDRFVAHNFSFDPDPHNKNTNHSPLPFGGLMTGSHALLNNNISASTSLPGVKLELPSSQFAESVQITGTPLEMVNNSSNKSFTLSPPPAPSTHVDCFAPQN…	ATGTTTGGCTGTGATGGTGATTCAACAACCACAGGGAAAATGAGTTCAACGACGAGTGACAGTGTTGCAGCCAAGGATCAGAAATCATTTGATGGAGGGGATGTTGGGAGTGGGTCTCTCAAGAAGGGGCCATGGACATCTGCAGAGGATGCAATTCTGGTTGAGTATGTTAAAAAACATGGCGAGGGTAATTGGAATGCAGTGCAGAAGCATTCTGGCCTGTATCGCTGTGGGAAGAGCTGTAGGTTGAGGTGGGCTAACCATCTCAGACCTAATCTTAAAAAAGGTGCTTTCACTGCAGAGGAGGAGCAGATCATAATTGAGCTTCATGCCAAGCTTGGCAACAAGTGGGCACGCATGGCTGCTCAGCTGCCTGGGCGTACTGATAATGAGATTAAA…
TcMYB22	367	6.36	41303.8	MGRTPCCEKLGLKKGSWTTDEDKILVEYIQKHGHGSWRALPKQAGLLRCGKSCRLRWTNYLRPDIKRGPFAPEEERTIIQLHAILGNRWSSIASQLPGRTDNEIKNFWNTHLKKKLLQMGLDPSTHAPKSETAIPNGSKGYQYSSVMRHMSQWENARLEAEARLSRDSIISSSSNKLKGNDNVEADVKAPTDLFLKLWNSEAGRVFRKEATFDKTKNNNGGIPDGVDCDTSPVSSLYSGCSSDQLKINLPDGEPNKAYGSSSAHMNWANTESNKSNHEDDSSSDELNAHGHADHNHDIQGFTDLLLDFPDNNIVNNNPNKINCMVTDLSTNFQQQSPWPWQELRLDEDRDYWNNVLVIHGQTSSTQT*	ATGGGTAGAACCCCTTGCTGTGAAAAATTGGGCCTGAAGAAAGGGTCCTGGACCACTGATGAAGACAAAATTCTTGTTGAATACATTCAGAAACATGGCCATGGAAGCTGGCGTGCTCTTCCCAAGCAGGCTGGGCTTCTTCGCTGTGGGAAAAGTTGCCGACTGCGTTGGACAAATTACCTGAGACCTGACATTAAGCGAGGGCCATTTGCACCAGAAGAAGAAAGGACTATTATTCAGCTACATGCAATTCTAGGCAACAGGTGGTCTTCAATAGCTTCTCAGTTGCCAGGGAGAACTGACAATGAAATCAAGAATTTCTGGAACACCCACCTGAAGAAAAAGCTGTTGCAAATGGGATTGGATCCATCTACCCATGCACCCAAATCTGAGACAGCC…
TcMYB23	327	6.42	37193	MGHHSCCNKQKVRRGLWSPEEDEKLIRYVTSHGHGCWSSVPKQAGLQRCGKSCRLRWINYLRPDLKRGCFSIQEERLIIELHKILGNRWAQIAKHLPGRTDNEVKNFWNSCIKKKLLAQGMDLNTHQLINQPTSITESKNLREIASGSDLPLAKNVDISSYALLPDMIYKGWPYEYQVSIAHNSTSFERKFIQAELTSAPLMPASSIKDYLRLESKQLAAHYNPTDLGHHGIDTTIPIYEISTSHQLGTPTVAQNDCGLYPYYSTQMPKLCEMEHAEDQCNSNIEGANDNQFSVSANCDSYEHFDIDLFDSSVMVSQCMNHPATEWS*	ATGGGGCACCATTCTTGCTGCAACAAGCAGAAGGTGAGGAGGGGATTGTGGTCTCCTGAAGAAGATGAGAAGTTGATCAGATACGTTACCAGCCATGGCCATGGCTGCTGGAGCTCGGTTCCAAAGCAAGCAGGTTTACAACGCTGCGGAAAGAGTTGCAGGCTAAGATGGATCAACTATCTGAGACCAGATCTAAAGCGTGGCTGCTTCTCTATTCAAGAGGAAAGGCTCATTATTGAGCTTCATAAAATCCTTGGAAATAGATGGGCCCAAATAGCTAAGCATTTGCCTGGACGAACAGACAACGAAGTTAAAAACTTCTGGAATTCATGTATTAAAAAGAAACTCTTGGCCCAAGGAATGGATCTAAATACCCATCAGCTCATAAACCAGCCCACA…
TcMYB24	443	6.05	49384.3	MGRSPCCDENGLKKGPWTPEEDEKLIEYIQKHGHGSWRALPKHAGLLRCGKSCRLRWTSYLRPDIKRGKFSFEEEQTILHLHAMLGNKWSAIAGHLPGRTDNEIKNYWNTHLKKRLLQMGIDPMTHRPRTDLFAPSLSSYFASLNPWESARLEAEARLARHYLSLAAYRSENANVNLDLNLLRSACQLDEASAAAAATTFWAQQQSLSLTSSYGGHSLEQHMVQPNRFGMQPDRNMEGSCLSLQQDHQSQPHFLDNMCSLALGTYSPMDQVSIAPPPTDSCLTDDSLNPHATIFTTENGLKLGEDQKISISKVGYHHYNDEEYSNLNPKLAAEMTANNNLRWADVKSHSLPPLVSATGSPRSTTFNVGPDTTCSSPDHGYGPSLPPELLLEFTENSIIN…	ATGGGGCGAAGTCCATGCTGTGACGAGAACGGACTGAAAAAGGGTCCGTGGACACCCGAAGAGGATGAGAAACTAATCGAATACATACAGAAGCACGGCCATGGCAGTTGGCGTGCGCTGCCTAAGCATGCAGGCTTGCTCAGATGCGGGAAGAGCTGCAGGCTACGGTGGACTAGCTACTTAAGACCCGACATAAAACGAGGGAAATTCTCGTTTGAAGAGGAGCAGACCATACTGCATCTCCATGCTATGCTCGGAAACAAGTGGTCTGCAATAGCTGGTCATCTCCCGGGGAGAACGGACAACGAGATCAAGAATTACTGGAATACCCATTTGAAGAAACGGTTGCTTCAGATGGGAATCGATCCCATGACCCACAGGCCACGCACAGACCTCTTT…
TcMYB25	267	4.75	29928.1	MAAGLLRCGKSCRLRWTNYLRPDIKRGNFSPEEEEAIINLHQPLGNRWSTIASRLPGRTDNEIKNVWNTHLKKRLLRMGIDPATHAVGSPASHSLISLYNSKYKDASLAPPFQTQPEASPDSPTTFLNLSDSIHDSQDLSSEIFSSVSSRDSETVTGADSGSRLDCIDSFEVEVDLGYDQKPQNIQDENPQTSILQNQDFADEEGWFPRENQDASEISSSEITWDDFSSMDGTADTNPQPLIWNIDFPLLPSRHDLLLKLLGRRIIV*	ATGGCGGCAGGACTCTTGAGATGCGGTAAAAGCTGTCGACTGCGGTGGACTAATTATCTCAGACCAGACATTAAACGTGGAAATTTCAGCCCTGAAGAGGAGGAAGCCATCATAAATCTTCACCAACCTTTGGGCAACAGGTGGTCTACAATTGCCTCACGCCTGCCTGGAAGAACAGACAACGAGATCAAAAACGTGTGGAATACGCACTTGAAGAAGCGTCTTCTGCGAATGGGAATCGATCCGGCGACGCATGCAGTAGGGTCCCCTGCTTCTCACAGTTTAATTTCACTTTATAACTCTAAATACAAGGATGCTTCGCTTGCGCCGCCATTTCAGACTCAGCCAGAAGCTTCGCCTGATTCTCCCACCACATTCTTAAACCTGTCCGATTCAATC…
TcMYB26	207	8.68	23357.4	MRYERVHRCCSKRAVKRGLWSPDEDLKLIRYIRSHGAGNWPSLPHRAGLERCGKSCRLRWMNYLRPGIKRGQFSEEEEEAIICLHSLMDNRWAQIAKHLPGRTDSEIKNLWHSRLKKKNGGFQSVSASSFKRNEYGDAATDLNAFVELAHASTATATATSTESIASTILQTECCADSLQSIELAGGDNNYLEIIMEGAAAWAQYWPL*	ATGCGGTATGAGAGAGTGCATAGGTGCTGTAGTAAGCGGGCTGTAAAGAGAGGGCTTTGGTCTCCAGATGAAGATTTGAAACTCATTAGATATATACGTTCCCATGGAGCAGGGAACTGGCCCTCTCTTCCTCACAGAGCTGGATTAGAGCGGTGTGGAAAGAGTTGCAGGCTGAGGTGGATGAATTACTTGAGGCCTGGCATTAAACGAGGGCAATTCTCTGAGGAAGAAGAAGAGGCCATCATCTGCCTTCACTCTCTTATGGATAACAGATGGGCTCAGATAGCTAAGCATTTGCCAGGAAGGACGGACAGTGAAATTAAAAACTTGTGGCACAGCCGCCTCAAGAAGAAAAACGGGGGGTTTCAATCGGTTTCTGCTTCCTCTTTCAAACGAAAT…
TcMYB27	229	9.63	26458.8	MKNSNDKEVARQSKLCGRGHWKPNEDAKLKEMVALYGAQNWMFIASKLHGRSAKSCRLRWLNQLDPRINHRAFSEEEDDQLLRAHRLYGNKWSMIARLFPGRTDNAVKNHWHVITGKHRELSNTSQGKKQQKQHQQRNENSDSSCIEISSQHQSNVLDKTNTLHLTKASSAINRIERNYTETHFTKESSVSVADNSYIFNIKSLDFKKSGEEDMPVRKHFIDFLGVGAI*	ATGAAGAATTCAAATGACAAAGAAGTGGCCAGGCAATCAAAGCTGTGCGGGAGAGGCCACTGGAAGCCCAACGAGGACGCCAAGCTTAAGGAGATGGTCGCGCTATATGGCGCTCAAAATTGGATGTTTATTGCGAGCAAACTCCATGGCAGGTCTGCAAAGAGTTGCAGGCTGAGGTGGTTGAACCAGTTGGATCCCCGAATCAACCACAGGGCTTTCAGTGAAGAGGAAGACGATCAGCTTCTTCGAGCCCATCGCCTGTATGGAAACAAATGGTCCATGATCGCCCGGCTGTTTCCTGGTCGAACTGATAACGCTGTCAAGAATCATTGGCATGTTATCACGGGGAAACACCGGGAGCTTTCAAACACCAGCCAGGGGAAAAAACAGCAGAAACAA…
TcMYB28	394	9.07	45928.9	MKERERWRPEEDSLLHAYVKKYGAREWNLVSQRMNKDLDRDGKSCEERWKNYLKPGIKKGSLSEEEQRLVISLQAKYGNKWKKIAAQVPGRTAKRLGKWWEVYKEKQQKKDTEDTPMHSSNLVTEGNKYHHILETFAEKYMQNQNQYISPSPSITVAMPPPSLSLNFPTNTIPVPDFLNLPAPNPFSSMELLPDRSPWILTAKKSSVSSSYTSSEYSASPSCSSPSVTLSLSPSLNSHVAPAPKNTANEISETSARDKSSIHFDDSAPNRQAASDSVIMQQMSTLFEHYKDLEERHQSWLKHKKEASWRLKRLQDQLESEKARKRREKIEEIDSKVWALREEEKICLDRLEKDYRDQIARLHKDEEFKEARMMEMWTAQHVQLSNLFKQIVHRH*	ATGAAGGAGCGGGAGAGATGGCGGCCTGAGGAAGACTCTTTGTTACATGCCTACGTCAAGAAATATGGGGCAAGAGAATGGAACCTGGTATCCCAGAGAATGAATAAAGACCTCGACAGGGACGGCAAGTCCTGCGAAGAGAGGTGGAAGAATTATTTAAAGCCCGGAATTAAAAAGGGCTCTTTGTCGGAAGAAGAGCAGCGTCTAGTCATAAGTCTTCAAGCGAAGTACGGAAACAAATGGAAGAAAATCGCAGCACAAGTGCCTGGAAGAACTGCCAAGAGATTGGGTAAATGGTGGGAAGTCTACAAAGAAAAACAACAGAAGAAAGACACAGAGGATACGCCCATGCATTCTTCTAACCTCGTTACAGAAGGTAACAAGTACCATCATATTCTC…
TcMYB29	529	7.95	60234.4	MSYEEMNSILHTEFHRIPDKSRDRHFVTWSEEEDNILREQVKIHGTERWSVIASKLRNKTGRQCRRRWNTYLSTTYKKGGWSPEEDVLLFEAHQKFGNRWTEIAKVVQGRTDNAVKNRFNALHRKLEKKKSSNENDEQINVGVNKRVALKDESSVQTLDSTLFCKKMRIQFVNPSEGITLQRDEPAVRTRNKSGRMPGDAAIKSGIRGEEPHSMLQSRVPLSVLPHENLTNLAQSRFLVHSSPYHAFSTIKRPTKQVAVSKLQSVFLEKDNPRLSALTQQAELLSSLAQRRNAETSNQKTENNWQAVDGILIEGKESLLNTEDQMKDQSPHPNLAADASTPFMTSKDKCQNATHLASKRPHLPSLPKLCESYEKISREGSEFSDSSNIHMNVDDMPECN…	ATGAGCTATGAAGAGATGAATTCTATTTTGCACACAGAGTTTCACAGGATTCCTGACAAGTCCAGAGACAGGCATTTTGTGACATGGTCCGAAGAGGAAGATAACATACTTCGGGAGCAGGTCAAAATTCATGGAACCGAGAGGTGGTCTGTCATTGCATCGAAGTTAAGAAATAAAACAGGCAGACAATGCAGGAGAAGGTGGAACACATACTTGAGTACAACATATAAAAAAGGTGGTTGGTCGCCAGAAGAGGACGTGCTCTTGTTTGAGGCACATCAAAAATTTGGCAACCGATGGACAGAAATTGCAAAAGTTGTTCAGGGCAGGACTGACAATGCCGTTAAAAACCGATTCAATGCATTGCATAGAAAGCTAGAAAAAAAGAAATCATCCAAC…
TcMYB30	294	8.97	32089.8	MASLKSGEEVDRIKGPWSPEEDAALQRYVQQYGPRNWSLISKAIPGRSGKSCRLRWCNQLSPRVEHRPFTPQEDAAIIRAHSLHGNKWATIARMLSGRTDNAIKNHWNSTLRRRCSTHAGCALVIREDKDNEDDRKRCLEEYDNDSEGGSSWEARKLKKLSIGGATREAFRCSSPSSESDRSGAPSDGGAHIYRPVAHFVAASNRSGDLNEAADPPTCLSPSLPGTGLTSNSKPPPPSTPASLRGSAAPPGYTKAEEAMESMSSAINTASTQIRSYSILRHPAFIMQEPTPVPI*	ATGGCGTCGTTGAAAAGTGGTGAAGAGGTGGACAGAATAAAAGGGCCGTGGAGCCCTGAAGAAGACGCAGCATTACAGCGTTACGTGCAGCAATACGGGCCCAGAAACTGGTCGCTTATAAGTAAAGCCATCCCTGGGAGATCGGGGAAATCCTGTAGGCTGCGGTGGTGCAACCAGCTCAGTCCCCGGGTGGAGCACCGCCCTTTCACGCCGCAGGAGGACGCCGCCATTATCAGAGCTCATTCTCTGCACGGAAACAAATGGGCCACCATTGCGCGAATGCTCTCTGGCCGCACCGACAATGCCATAAAAAATCACTGGAATTCCACGCTGCGGAGGCGTTGCTCGACCCACGCGGGGTGCGCCCTCGTTATCAGAGAGGATAAGGATAACGAGGAT…
TcMYB31	394	9.07	45898.9	MKERERWRPEEDSLLHAYVKKYGAREWNLVSQRMNKDLDRDGKSCEERWKNYLKPGIKKGSLSEEEQRLVISLQAKYGNKWKKIAAQVPGRTAKRLGKWWEVYKEKQQKKDTEDTPMHSSNLVTEGNKYHHILETFAEKYMQNQNQYISPSPSITVAMPPPSLSLNFPTNTIPVPDFLNLPAPNPFSSMELLPDRSPWILTAKKSSVSSSYTSSEYSASPSCSSPSVTLSLSPSLNSHVAPAPKNTANEISETSARDKSSIHFDDSAPNRQAASDGVIMQQMSTLFEHYKDLEERHQSWLKHKKEASWRLKRLQDQLESEKARKRREKIEEIDSKVWALREEEKICLDRLEKDYRDQIARLHKDEEFKEARMMEMWTAQHVQLSNLFKQIVHRH*	ATGAAGGAGCGGGAGAGATGGCGGCCTGAGGAAGACTCTTTGTTACATGCCTACGTCAAGAAATATGGGGCAAGAGAATGGAACCTGGTATCCCAGAGAATGAATAAAGACCTCGACAGGGACGGCAAGTCCTGCGAAGAGAGGTGGAAGAATTATTTAAAGCCCGGAATTAAAAAGGGCTCTTTGTCGGAAGAAGAGCAGCGTCTAGTCATAAGTCTTCAAGCGAAGTACGGAAACAAATGGAAGAAAATCGCAGCACAAGTGCCTGGAAGAACTGCCAAGAGATTGGGTAAATGGTGGGAAGTCTACAAAGAAAAACAACAGAAGAAAGACACAGAGGATACGCCCATGCATTCTTCTAACCTCGTTACAGAAGGTAACAAGTACCATCATATTCTC…
TcMYB32	420	4.95	47113.2	MGRAPCCDKMGVKRGPWTTEEDKALVNFIHRNGHGNWRALPKQAGLMRCGKSCRLRWTNYLRPDIKRGNFSPEEEQAIINLHQLMGNRWSAIASRLPGRTDNEIKNVWNTHLKKRLLRMKIDPTTTTLSMSPGLITLGGNLAVPAFPTQQKASPDFPTTVCNLSDSIHDSHNLSSEDFPCIDCDTGSRLNLMDSFGVEYDQKPQNIQDETRRQEIDPTTTTLSMSPGLITLGENLAVPAFPTQQKASPDFPTTVCNLSDSIHDSHNLSSEDFPCIDCDTGSRLNLMDSFGVEYDQKPQNIQDETQRQDPQTYISQNQDFADEERWFPGKSQDATEITSSEIMWPQHSSNQKAHSPMSAHPDDDLLSTIDGVTEDTNSQTLWSIDFHAHDDDCDGTDYWL…	ATGGGTCGAGCTCCGTGCTGTGATAAAATGGGAGTAAAGAGGGGTCCTTGGACTACGGAGGAGGATAAGGCACTCGTTAATTTTATTCACAGAAATGGCCATGGGAACTGGCGTGCGCTCCCTAAACAAGCAGGCCTTATGAGATGCGGTAAAAGCTGTCGACTGCGGTGGACTAATTATCTCAGACCAGATATTAAACGTGGAAATTTCAGCCCTGAAGAGGAGCAAGCCATTATAAATCTTCACCAACTTATGGGCAACAGGTGGTCTGCAATTGCCTCACGCCTGCCTGGAAGAACAGACAACGAGATAAAAAACGTGTGGAATACTCACTTGAAGAAGCGTCTTCTGCGAATGAAAATCGATCCGACGACGACAACCCTTTCAATGTCACCCGGT…
TcMYB33	351	9.12	37699.2	MASLKSGEEVDRIKGPWSPEEDAALQRYVQQYGPRNWSLISKAIPGRSGKSCRLRWCNQLSPRVEHRPFTPQEDAAIIRAHSLHGNKWATIARMLSGRTDNAIKNHWNSTLRRRCSTHAGCALVIREDKDNEDDRKRCLEEYDNDSEGGSSWEARKLKKLSIGGATREAFPCSSPSSGSDRSGASSDGGAHIYRPVARFVAASNRSGDLNEAVDPPTCLSLSLPGTGLTASNSKPPSPSTPASLRGSAAPPGYIKAEEAMELMSSAINTALTQTLLPILSPRSHAGAAASANSAGFLAIMQEMVAKEVHSYMAALKQPCLNSNSFSANAPSNFAAASSSMNFLRTGISRLE*	ATGGCGTCGTTGAAAAGTGGTGAAGAGGTGGACAGAATAAAAGGGCCGTGGAGCCCTGAAGAAGACGCAGCATTACAGCGTTACGTGCAGCAATACGGGCCCAGAAACTGGTCGCTTATAAGTAAAGCCATCCCTGGGAGATCGGGGAAATCCTGTAGGCTGCGGTGGTGCAACCAGCTCAGTCCCCGGGTGGAGCACCGCCCTTTCACGCCGCAGGAGGACGCCGCCATTATCAGAGCTCATTCTCTGCACGGAAACAAATGGGCCACCATTGCGCGAATGCTCTCTGGCCGCACCGACAATGCCATAAAAAATCACTGGAATTCCACGCTGCGGAGGCGTTGCTCGACCCACGCGGGGTGCGCCCTCGTTATCAGAGAGGATAAGGATAACGAGGAT…
TcMYB34	350	6.01	38502.6	MGRQPCCDKVGLKKGPWTAEEDKKLVDFIVNNGHCCWRTVPKLAGLLRCGKSCRLRWTNYLRPDLKRGLLSDTEEKLIIDLHSHLGNRWAKIAAHLPGRTDNEIKNYWNTHIKKKLSRMGIDPLTHLPIADTHLSVGKNPLVSTAEPCNEVVELNNVEFSSAKLEAMSTSGSLNHSDVFEDDKSSVETSNYTIPSRFGCDAVSLFNAGDGTGSSPTLPFAGKRDNCWESNESMLLLRKEAKVEVEATAMTMHGDDGLWELGDFVGSSLTLEPPPPPASMSSSSSNSATKTSPELKWVNGHEVAVPHHMDMIIAGSFLAPYEANAQLWTQGIYPFPPWEGFSVTSSSSHII*	ATGGGGAGGCAACCTTGCTGTGATAAAGTTGGGCTCAAAAAAGGACCATGGACTGCTGAAGAAGACAAGAAACTCGTTGATTTTATCGTTAACAATGGCCACTGCTGCTGGCGCACTGTTCCTAAACTTGCTGGACTGTTAAGATGCGGCAAGAGCTGCAGGCTGAGATGGACAAACTATCTTCGCCCTGATCTCAAACGAGGATTGTTATCGGACACGGAAGAGAAGCTTATCATTGATCTCCATTCTCACCTGGGCAATAGGTGGGCGAAGATCGCAGCGCACTTGCCAGGGCGTACTGATAACGAAATAAAGAATTACTGGAACACCCACATCAAGAAGAAGTTGAGTCGGATGGGAATCGACCCTCTGACCCACCTGCCCATTGCAGATACCCAT…
TcMYB35	524	8.61	57450.1	MFGCDGDSTTQEKMSSTSDSVAAKDRKLLERGDVGGGSLKKGPWTSAEDAILVEYVKKHGEGNWNAVQKQSGLFRCGKSCRLRWANHLRPNLKKGAFTAEEEQIIIELHGKLGNKWARMAAQLPGRTDNEIKNYWNTRIKRRQRQGLPLYPPDLHSQQQSNEHQLSVNGGNLSQHHHHQEFLPSSSKLDIPNVAFDSLKPNQHSLTYPSFPGLTKASMSSRVNQGMGFLQSYSLMNPIQHGKRFREAESFMSFGASTGGGMFSFSQPDDNRKSIVGPCFKTTRRPYGQHGRLDGFVANNFSFHPNPSNKNTNHSPLQFGGLLTGSQTILNDNISASTSLPGVKLELPSSQFAESVHTTGPPPEMVNSSSFNSFTLSPPAHSTPVNCFARQNNGLLEALL…	ATGTTTGGCTGTGATGGTGATTCAACAACCCAGGAGAAAATGAGTTCAACGAGTGACAGTGTTGCAGCTAAGGATCGAAAGTTACTGGAACGGGGGGATGTTGGAGGTGGGTCTCTGAAGAAGGGGCCATGGACCTCTGCAGAGGATGCGATTTTGGTTGAATATGTGAAAAAACATGGGGAGGGCAATTGGAATGCAGTGCAGAAGCAGTCTGGGTTGTTTCGCTGTGGGAAGAGCTGTAGGTTAAGGTGGGCTAATCATCTCAGACCTAATCTCAAAAAGGGTGCTTTTACTGCAGAGGAGGAGCAAATCATAATCGAGCTCCATGGCAAGCTTGGCAACAAGTGGGCACGCATGGCTGCTCAGCTGCCTGGACGTACTGATAACGAGATAAAAAAC…
TcMYB36	486	8.86	52956.2	MFGCDGDSTTQEKMSSTSDSVAAKDRKLLERGDVGGGSLKKGPWTSAEDAILVEYVKKHGEGNWNAVQKQSGLFRCGKSCRLRWANHLRPNLKKGAFTAEEEQIIIELHGKLGNKWARMAAQLPGRTDNEIKNYWNTRIKRRQRQGLPLYPPDLHSQQQSNEHQLSVNGGNLSQHHHHQEFLPSSSKLDIPNVAFDSLKPNQHSLTYPSFPGLTKASMSSRVNQGMGFLQSYSLMNPIQHGKRFREAESFMSFGASTGGGMFSFSQPDDNRKSIVGPCFKTTRRPYGQHGRLDGFVANNFSFHPNPSNKNTNHSPLQFGGLLTGSQTILNDNISASTSLPGVKLELPSSQFAESVHTTGPPPEMVNSSSFNSFTLSPPAHSTPVNCFARQNNGLLEALL…	ATGTTTGGCTGTGATGGTGATTCAACAACCCAGGAGAAAATGAGTTCAACGAGTGACAGTGTTGCAGCTAAGGATCGAAAGTTACTGGAACGGGGGGATGTTGGAGGTGGGTCTCTGAAGAAGGGGCCATGGACCTCTGCAGAGGATGCGATTTTGGTTGAATATGTGAAAAAACATGGGGAGGGCAATTGGAATGCAGTGCAGAAGCAGTCTGGGTTGTTTCGCTGTGGGAAGAGCTGTAGGTTAAGGTGGGCTAATCATCTCAGACCTAATCTCAAAAAGGGTGCTTTTACTGCAGAGGAGGAGCAAATCATAATCGAGCTCCATGGCAAGCTTGGCAACAAGTGGGCACGCATGGCTGCTCAGCTGCCTGGACGTACTGATAACGAGATAAAAAAC…
TcMYB37	363	7.68	40051.9	MQPTQMVEKLGPRNWSLISKGIPGRSGKSCRLRWCNQLSPQVQHRPFSPEEDRLIIQAHAQHGNKWATIARILPGRTDNAIKNHWNSTLRRRYLAEKSPSSHSHSLSLSHSLDNNNNGIATAASPTAENCSMKRSSADLSHDGGSAQDDGNIEVESQRFKKLNCGGPAPDSPPISDDNNFFPTAQQIHRPLPMQSAFKSYNNLNQDPPTSLSLSLPGCSEEKHKTEDKIQQPNTTSDLNQQEKIPQNGAQQQVFHYPFMLPPLQETTMMNGYLKTDEAMLMMTEAVKMAVGQAISLVFQASQSQFKENNGAGLGLLDIMREMIAKEVQDYMAVSQPAAAPCNQTGLNSYSPSAMDSSSLPRKV*	ATGCAGCCTACACAAATGGTGGAGAAACTGGGGCCGAGAAACTGGTCCCTCATAAGCAAGGGCATCCCTGGGCGGTCGGGGAAATCATGCCGCCTGAGGTGGTGCAATCAGCTGAGCCCGCAGGTGCAGCACCGCCCATTTTCCCCCGAGGAGGATCGTCTCATAATCCAAGCCCACGCTCAGCACGGCAACAAATGGGCAACCATCGCTCGCATCCTCCCAGGCCGCACCGACAACGCCATCAAAAACCACTGGAATTCCACCCTCCGCCGCAGGTACCTCGCCGAGAAATCCCCCTCCTCGCATTCCCACTCTCTGTCTCTCTCTCACTCGCTCGACAACAACAACAATGGCATTGCTACCGCTGCCAGTCCTACTGCGGAAAACTGCAGCATGAAA…
TcMYB38	451	6.72	51368	MSLKELDGTVCLLPQWFQRSGSSAAAGFEPVTFELLRKDGGFEGSVSGESQCRSEIAFQQVLSPTSERQRMTMMQKEEEKEEEAWAVESSSRAENWSSQEDYCTKEKESEEMENSNAKEVLDSCGQSKLCARGHWRPAEDAKLKELVTKYGPQNWNLIAEKLHGRSGKSCRLRWFNQLDPRINRRPFSEEEEDRLLAAHRLYGNKWAMIARLFPGRTDNAVKNHWHVIMARKYREHSSAYRRRKPQQHQQYLQQHRKENNKAFNIEVNSQYEYSTIPKTTGSCLNLVNPISGFTSNNEIHFTSYSTANNKEFSVTTRVPDYSSIKSFGAVQSLHYLAGSKDAVIPFERTNALGSEVDKFRLSADQVPESANTNNSIHKFPLHVDSYGLLVEKNYMESSF…	ATGAGCCTGAAAGAATTAGATGGGACGGTTTGTCTTTTACCTCAGTGGTTTCAGCGGAGCGGCAGCTCCGCCGCGGCAGGTTTTGAACCCGTGACGTTTGAGCTTTTGAGGAAGGATGGGGGTTTTGAAGGATCTGTGTCTGGTGAAAGCCAATGCAGAAGCGAGATTGCCTTTCAGCAGGTGCTCAGCCCGACCTCGGAACGACAACGCATGACGATGATGCAGAAGGAGGAGGAGAAAGAGGAGGAGGCCTGGGCTGTGGAGAGCAGTTCCAGAGCGGAGAACTGGTCGAGCCAAGAGGATTATTGCACCAAGGAGAAGGAAAGCGAGGAGATGGAGAATTCGAACGCGAAAGAAGTGTTGGATTCCTGCGGGCAATCGAAGTTATGTGCTAGAGGC…
TcMYB39	332	6.86	37036.2	MGRSPCCDKVGVKKGPWTPEEDIVLVSYIQQHGPGNWRMVPAHTGLSRCSKSCRLRWTNYLRPGIRRGNFTPHEDRIIVHLQALMGNRWAAIASYLPQRTDNDIKNYWNTHLKKRLKKLQSPFVSNELARVNLSSHGEAPKGLWESKLQTDIHHAKQALYEALNYGSSSDLQGSENNLLPTESMPMHRDLNSSSSYAASIDNFSKLLEGWKKSTCPNEIKLPNCSSATSSCSDSQSSQYSALPISSDSQLEGLNSIDNGSLAWTSAFSSSQGYNGDEKASANHLHLQCQSNHFQNSVDNGLPFSVLENWLLEETSQDQLSYMNQAVSELGYI*	ATGGGGAGGTCTCCTTGCTGTGATAAGGTAGGGGTGAAGAAGGGGCCGTGGACTCCTGAAGAGGATATTGTTCTTGTGTCTTATATTCAGCAGCATGGCCCTGGGAACTGGAGAATGGTTCCTGCTCATACTGGTTTGTCAAGATGCAGTAAGAGCTGCAGATTGAGATGGACGAACTACTTGAGGCCAGGGATCAGGCGTGGGAATTTCACTCCCCATGAAGACAGGATTATTGTTCATCTGCAGGCTCTAATGGGTAACAGATGGGCAGCAATAGCTTCTTATCTCCCTCAGAGGACAGACAATGATATCAAAAATTATTGGAATACCCACTTGAAGAAAAGGCTAAAAAAACTGCAATCACCATTTGTAAGCAATGAACTCGCTCGTGTGAATTTA…
TcMYB40	311	4.72	35054.6	MGRAPCCDKMGLKRGPWTSEEDQILITFIHRNGHGNWRALPKQAGLLRCGKSCRLRWTNYLRPDIKRGNFSPEEEEAIINLHQLLGNRWSTIASRLPGRTDNEIKNVWNTHLKKRLLRMGIDPATHAVGSPASHSLISLYNSKYKDASLAPPFQTQPEASPDSPTTFLNLSDSIHDSQDLSSEIFSSVSSRDSETVTGADSGSRLDCIDSFEVEVDLGYDQKPQNIQDENPQTSILQNQDFADEEGWFPRENQDASEISSSEITWDDFSSMDGTADTNPQPLIWNMDFQSYDDDNDYWLNILRQAASSPTL*	ATGGGGCGAGCTCCGTGCTGTGATAAAATGGGACTGAAGAGAGGTCCTTGGACTTCTGAAGAGGATCAAATACTCATTACTTTTATTCACAGAAATGGCCATGGGAACTGGCGTGCTCTCCCCAAGCAAGCAGGACTCTTGAGATGCGGTAAAAGCTGTCGACTGCGGTGGACTAATTATCTCAGACCAGACATTAAACGTGGAAATTTCAGCCCTGAAGAGGAGGAAGCCATCATAAATCTTCACCAACTTTTGGGCAACAGGTGGTCTACAATTGCCTCACGCCTGCCTGGAAGAACAGACAACGAGATCAAAAACGTGTGGAATACGCACTTGAAGAAGCGTCTTCTGCGAATGGGAATCGATCCGGCGACGCATGCAGTAGGGTCCCCTGCTTCT…
TcMYB41	185	7.8	21504	MEKRRQAGWVTIPPVLKRVNSTREEEHLIVELQSHWGNRWSRIAQRLPGRTDNEIKNYWRTRLKRKIQKASEGNRCPQARYLFQYYSMPHLFLQQNSGAEENMTPQNFPQQWGRLDNNTLVQLHCEGGAKEQFFTSPGESIGKSNGVNSSVVVDGMDMPYDVDSFATLFSELYDDNGARSQFLEF*	ATGGAGAAGCGCAGACAGGCTGGGTGGGTAACTATCCCGCCAGTTCTCAAGAGAGTCAACAGTACTCGAGAGGAAGAACATTTGATCGTTGAACTCCAAAGCCATTGGGGTAACAGGTGGTCTCGAATTGCGCAGCGTTTACCTGGGCGTACAGACAATGAAATCAAGAACTACTGGAGGACGAGGCTTAAAAGAAAGATCCAGAAAGCAAGCGAAGGAAATCGATGCCCACAGGCGCGATACTTATTTCAGTATTACTCCATGCCACATTTATTTCTGCAACAAAACAGCGGAGCAGAAGAGAATATGACACCGCAGAATTTCCCACAGCAATGGGGGAGACTCGACAACAACACACTGGTTCAGCTTCATTGTGAAGGAGGAGCAAAAGAGCAATTT…
TcMYB42	218	6.91	25341.8	MGMVDGELFPKKAGLKRCGKSCRLRWLNYLRPDIKRGNISADEEELIIRLHRLLGNRWSLIAGRLPGRTDNEIKNYWNTRLSRKLPNKQCPQSKSPHIFKVIPVKTTAMRIPKGLNKRVSISNARRDHEDFRFPGDGDTSKPWCDLSVEELMTDNDLQFVDFTETNNFVDTQFPSMVVDGLYEFPHFQQSNDGVTAFDFFEDFRLEEFEAMTCSNDEK*	ATGGGGATGGTGGATGGAGAGCTCTTCCCAAAAAAAGCAGGGTTGAAGAGATGCGGAAAGAGTTGCAGATTGCGTTGGTTGAATTATCTGCGCCCTGATATCAAGCGAGGAAACATTTCAGCAGACGAAGAGGAGCTCATTATTAGACTCCATAGACTTCTTGGCAATAGGTGGTCACTGATAGCGGGGCGACTGCCAGGGCGAACAGACAACGAAATCAAGAATTACTGGAACACTCGTTTGAGCAGAAAACTGCCAAACAAACAGTGTCCCCAATCCAAATCTCCTCATATATTCAAAGTTATTCCAGTGAAAACAACAGCAATGAGAATACCAAAAGGCCTCAACAAACGGGTATCTATTTCTAATGCTAGGAGAGATCATGAAGACTTCAGATTT…
TcMYB43	443	5.99	49330.3	MCQTQEEGATGSWIQPDNGFNDSVMHPNTRIPAQTGQNLVPYFEASEEALMLQNNNNLYGKMQMQYSESSNSKRVPNHGGGGGGGDNNSMGLNQMGSDDTEEVENCEDGVQSRLCARGHWRPAEDAKLKELVTQCGPQNWNIIAEKLQGRSGKSCRLRWFNQLDPRINRRPFTEEEEDRLLAAHRLYGNKWAMIARLFPGRTDNSVKNHWHVIMARKYREQSNVYGRRKPSQVQRSRQKYGSSSQHGPGLSNNNEASHCVGAACWVDHDDERCAGYSNLQQRINGNMYGAVQPRNVFEGGNKRGVDMLGCNLDNYHAMASQMEAGESSSPSQVTTDSCAVVSFLRQGAKRSFSSVDMTHFSLGNTNNKHQDLQYGCSDSSNSELTVVEAPCVDNSSTTL…	ATGTGCCAAACACAAGAGGAAGGAGCCACCGGAAGCTGGATTCAACCAGATAATGGTTTCAATGATTCTGTTATGCATCCCAATACCAGAATTCCAGCACAGACTGGGCAGAATTTGGTTCCATATTTTGAAGCATCAGAGGAAGCTTTGATGTTACAAAATAATAACAATCTCTATGGGAAAATGCAAATGCAGTACTCGGAAAGCAGCAACAGTAAGAGGGTTCCAAACCATGGGGGTGGTGGTGGTGGTGGTGATAACAACAGCATGGGACTGAACCAAATGGGTTCAGATGATACAGAAGAAGTGGAGAATTGTGAAGATGGCGTTCAGTCTAGGCTGTGTGCCAGAGGCCATTGGAGGCCTGCAGAAGATGCCAAGCTCAAGGAATTGGTGACA…
TcMYB44	227	8.33	25655.7	MRSCSGLKRTGKSCRLRWLNYLSPGVKRGNITLEERHLILELHGRWGNRWSKIARHLPGRTDNEIKNYWRTRIKKTQAQYKAINCYSNLSSTTSINGANTVERREQNVAACLQNSESIRNYVEQGETQWVSTLADSDTQEMASAPAWFDLSSTHKLGGIHTLLQSAPTPAAAPPKGISYSSELEVDAWSSNTSSSSILDAAEIDWLYTMDMNSLWHTTDEIISNTFW*	ATGCGCAGCTGTTCAGGGTTGAAGAGAACCGGAAAAAGCTGTAGATTGAGATGGCTCAACTATCTTAGCCCTGGCGTTAAGCGCGGTAACATAACGCTGGAGGAGCGACATCTAATTTTAGAACTCCATGGGCGTTGGGGCAATAGATGGTCCAAGATTGCAAGACATCTCCCAGGAAGAACAGATAATGAGATAAAGAACTACTGGAGAACCAGGATAAAGAAAACGCAAGCTCAATACAAAGCCATTAATTGCTATTCCAACCTATCTTCCACGACTTCCATTAACGGAGCCAATACTGTGGAAAGACGAGAACAAAACGTAGCTGCATGCTTGCAAAATAGTGAAAGCATTAGAAATTACGTAGAGCAAGGCGAGACGCAATGGGTGTCAACCTTG…
TcMYB45	161	9.94	17311.4	MASLKSGEEVDRIKGPWSPEEDAALQRYVQQYGPRNWSLISKAIPGRSGKSCRLRWCNQLSPRVEHRPFTPQEDAAIIRAHSLHGNKWATIARMLSGRTDNGQGGDIEMAFPFGGAGRRPGGVGGVVGGPGDLFPYRGVGKPWGGSQGTDDCASRRGRGPA*	ATGGCGTCGTTGAAAAGTGGTGAAGAGGTGGACAGAATAAAAGGGCCGTGGAGCCCTGAAGAAGACGCAGCATTACAGCGTTACGTGCAGCAATACGGGCCCAGAAACTGGTCGCTTATAAGTAAAGCCATCCCTGGGAGATCGGGGAAATCCTGTAGGCTGCGGTGGTGCAACCAGCTCAGTCCCCGGGTGGAGCACCGCCCTTTCACGCCGCAGGAGGACGCCGCCATTATCAGAGCTCATTCTCTGCACGGAAACAAATGGGCCACCATCGCGCGAATGCTCTCTGGCCGCACCGACAACGGACAGGGGGGGGACATAGAAATGGCGTTTCCTTTCGGGGGTGCGGGACGACGGCCAGGGGGGGTGGGGGGGGTTGTTGGGGGTCCTGGTGACCTA…
TcMYB46	592	5.68	63736.5	MFGCDGDSTTTGKMSSTTSDSVAAKDQKSFDGGDVGSGSLKKGPWTSAEDAILVEYVKKHGEGNWNAVQKHSGLYRCGKSCRLRWANHLRPNLKKGAFTAEEEQIIIELHAKLGNKWARMAAQLPGRTDNEIKNYWNTRIKRRQRQGLPLYPPDLHLQQQSNENQQNQQSVNGGDLSQHHRHEFLSGSSKLDIPNVTFDSLNPGQHSLAYSSFPALTEASMSSILNQGMGSSQNYNLMNPIQRAKRLREAESLMSFGAGVGVGGGGGGIFSFAQMGENNKSVMESCFKAARRPYGQPGRLDRFVAHNFSFDPDPHNKNTNHSPLPFGGLMTGSHALLNNNISASTSIPGVKLELPSSQFAESVHTTGPPPEMVNSSSFNSFTLSPPAHSTPVNCFARQN…	ATGTTTGGCTGTGATGGTGATTCAACAACCACAGGGAAAATGAGTTCAACAACGAGTGACAGTGTTGCAGCCAAGGATCAGAAATCATTTGATGGAGGGGATGTTGGGAGTGGGTCTCTCAAGAAGGGGCCATGGACATCTGCAGAGGATGCAATTCTGGTTGAATATGTTAAAAAACATGGCGAGGGTAATTGGAATGCAGTGCAGAAGCATTCTGGTCTGTATCGCTGTGGGAAGAGCTGTAGGTTGAGGTGGGCTAACCATCTCAGACCTAATCTTAAAAAAGGTGCTTTCACTGCAGAGGAGGAGCAGATCATAATTGAGCTTCATGCCAAGCTTGGCAACAAGTGGGCACGCATGGCTGCTCAGCTGCCTGGGCGTACTGATAATGAGATTAAA…
TcMYB47	251	5.12	29320.8	MYKQEENEIRKGPWTVEEDRLLIHYIALHGEGRWNSLAKAAGLKRSGKSCRLRWVNYLRPDLKRGNITPQEERLIIDLQSRWGNRWSRIARRLPGRTDNEIKNYWRTRIKKKLQDRNLFSQHSIYSNWMPNPFLQENNVAEEDWVSQDSIFSNCMPDQYSMLQDSGAEKDYLQESLLLTNTVADFDEEARTEFSIAPSNSNTISDGGNNFEESRDIVENMGMSFQMESFEAMLPELYGFLMDDGPVSLFTG*	ATGTATAAGCAAGAGGAAAATGAGATCAGAAAAGGTCCATGGACTGTAGAGGAGGATAGGCTGCTCATTCACTATATAGCACTTCATGGAGAAGGCCGGTGGAATTCTCTAGCCAAAGCTGCAGGCCTGAAGAGAAGTGGGAAGAGCTGCAGGCTGCGGTGGGTAAATTATCTCCGTCCAGATCTCAAGAGAGGCAATATTACTCCACAAGAAGAACGCCTCATCATAGACCTCCAAAGCCGATGGGGTAACAGGTGGTCTAGAATTGCACGGCGTTTACCGGGCCGAACTGATAATGAAATTAAGAACTACTGGAGGACAAGGATTAAAAAAAAGCTTCAGGATAGAAATCTATTCTCACAACATTCGATTTATTCAAACTGGATGCCAAATCCATTT…
TcMYB48	380	6.14	40912.5	MCSQRMAEEAQAVAAAERIKGPWSPEEDCTLQRLVEKYGARNWSVISKGIPGRSGKSCRLRWCNQLCPQVEHRPFSPTEDAVIVEAHSLHGNKWATIARLLPGRTDNSIKNHWNSTLRRRYSSEAEDLNNNNIGASLLPLNELTEKSKASSSCRKRSSSFSEGDSQGAEVESREPKRPNLVETPANSENTISFDSNVDFLGSASAGSNLHRPVPRQSAFNCYESIKTPEESPPLGSPSASGSDCSFDPPTLLSLSLPGSASTSENTGGECSPRQEQSYSPQPQANQEPFGYTFVPASGGYLKAEDAMSMMSAAVKAAVARVLPLIFQSGSGSDMNSDFGGGGLLSVMREMIAKEVHCYINGLKSSNPGGFVLNSVAPAFR*	ATGTGTTCGCAAAGAATGGCGGAGGAAGCCCAGGCCGTAGCCGCGGCGGAGCGGATAAAAGGTCCCTGGAGCCCCGAGGAAGACTGCACGCTGCAGAGGTTGGTGGAGAAATATGGCGCGCGTAACTGGTCGGTGATAAGCAAGGGGATACCTGGGCGGTCGGGGAAGTCGTGCAGGCTGAGGTGGTGCAACCAGCTGTGCCCACAGGTGGAGCACCGCCCATTCTCTCCCACAGAGGATGCCGTTATAGTGGAAGCCCACTCCCTCCACGGCAACAAGTGGGCCACAATCGCCCGTCTCCTCCCCGGCCGCACCGACAACTCCATCAAAAATCACTGGAACTCCACCCTCCGCCGCCGCTACTCCAGCGAAGCAGAGGACCTCAACAACAACAATATC…
TcMYB49	439	8.23	48488.2	MKSGNGNGDERIKGPWSPEEDAILSRLVDKFGARNWSLIARGIPGRSGKSCRLRWCNQLNPGVKRKPFTDEEDRAIVAAHAIHGNKWASIARMLQGRTDNAIKNHWNSTLRRKYLGIDKWKKELSSSGSEKVKEEYSDMETNNLVRDEESADGVVNSLKTGEDRCEVGSSVLIYPKAVLENMPDKVDDTNRKGGNQDNNGQIQAAEHKPDAKINDNLIRPTPRLSAFTRYSPVANKTKFSGRSMENNVNVSGITPRETPFTHSPTHDKLDYSCLTSCGAPIFPNSLCVGIFPGVPSHCGRGCCGTQAQRYENSHHTQDSLLGPEYVEFSDDSLASCNNFLNSFCLNRMGGVGSSSSESSMEKSSSVALHTTIAQMMIPMFTSQTQQQNGMENNMHFNAS…	ATGAAGAGTGGTAATGGTAATGGAGATGAGCGCATAAAGGGACCGTGGTCGCCAGAGGAGGATGCCATTCTGAGCAGGCTGGTGGACAAATTTGGAGCTCGCAATTGGAGTCTGATAGCGAGGGGCATTCCTGGTCGCTCTGGGAAGTCGTGCCGCCTTCGCTGGTGTAATCAGCTCAACCCCGGGGTCAAACGCAAGCCTTTCACTGATGAAGAAGATCGAGCAATTGTTGCTGCCCATGCAATTCATGGAAATAAATGGGCATCCATTGCAAGGATGCTCCAAGGGAGAACCGACAATGCAATCAAGAACCACTGGAATTCCACTTTAAGACGCAAATACCTTGGAATTGATAAGTGGAAGAAGGAATTATCCTCAAGTGGATCTGAAAAGGTGAAA…
TcMYB50	409	5.73	45541.9	MGRSPCCEKTHTNKGAWTKEEDDKLVAHIRAHGEGCWRSLPKAAGLLRCGKSCRLRWINYLRPDLKRGNFSEEEDELIIKLQLLLGNKWSLIAGRLPGRTDNEIKNYWNSWIKKKLAKAETSSSSEASKQKLLESMTKQSAIGNNNENPHYTPGISSSQSCTALPQIDCIPVKDLLNSRGSLPALWNCNNNLASISPYHNLVQIDSEAGGAKNQINIYCEPSFGYPEIYSHINPQLQYRQNLQNAPSYDNAFHGYSLDSIAGDLCFSNNSINPNMVQTISSHGSDLLNYVEMSPIYPHDEMLDASAILWGSGTNSNTMGSLKRLDNEGNGKCCTYLPHVYDDENSLAANNMTIDETNAMERRSDIKTCDENSSFQNIFGCGDQDSNLISTLQCYGSQTI…	ATGGGAAGATCTCCTTGCTGTGAAAAAACACACACAAATAAAGGAGCATGGACCAAGGAAGAAGACGACAAGCTTGTTGCCCATATTCGAGCTCATGGCGAAGGCTGCTGGAGATCCCTCCCCAAGGCCGCAGGACTGCTGAGATGCGGGAAGAGCTGCAGACTGCGGTGGATAAATTATTTGCGGCCCGATCTCAAGCGGGGGAATTTCTCCGAGGAAGAAGACGAACTCATCATCAAGCTGCAACTCCTCTTGGGAAACAAATGGTCTCTGATTGCCGGGAGATTGCCTGGTCGAACGGACAATGAGATAAAAAATTACTGGAACTCCTGGATAAAGAAAAAACTAGCCAAGGCTGAGACAAGCTCATCGTCCGAGGCCTCAAAACAGAAGCTATTA…
TcMYB51	348	5.66	39849.6	MGRAPCCSKDAGLNRGAWTAEEDLLLSEYITIHGDGGWRSLPQKAGLKRCGKSCRLRWLNYLRPDIKRGSISPDEEELIIRLHKLLGNRWSLIAGRLPGRTDNEIKNYWNTQLYKKLEISGSHAQETRNIKRTSKSRSRREEARHVSNKVPVKTTAVRIANGPVKLKGDLTQIVDTSQSWCQTFVDELMITNCDLDFVTTNNILDSASPFTEINRQGSPITKSNLINHQLQYSAVQNEFNTSKSSYFLNELSSPERNPLFLSFNFSEDMAVEEFEGRPKNDMHELCSLHANRQENESFTVCNDQGIQELFNDVEEGDWMDELRLLERSSLLEDDDWVERNSKAVGENY*	ATGGGTAGGGCTCCCTGCTGCTCGAAGGATGCAGGCCTCAATCGTGGAGCCTGGACTGCGGAGGAAGATTTGCTTTTGAGCGAATACATAACAATTCATGGAGATGGTGGATGGAGATCTCTTCCCCAAAAAGCAGGTCTGAAGCGCTGTGGGAAGAGTTGCAGACTGCGTTGGTTGAACTATCTCCGTCCTGACATTAAAAGGGGAAGCATTTCCCCTGACGAAGAGGAGCTGATTATCAGATTGCATAAACTTCTTGGCAATAGATGGTCATTAATTGCAGGACGGCTACCTGGTCGAACAGATAACGAAATCAAGAACTACTGGAACACTCAGTTGTATAAGAAGCTGGAAATTAGCGGATCCCATGCTCAAGAAACCAGAAATATCAAAAGAACA…
TcMYB52	379	5.3	42761.7	MSCTTEAKPKLRKGLWSPEEDDKLINYMMKNGQGCWSDVAKQAGLQRCGKSCRLRWINYLRPDLKRGAFSPHEEQLIIHLHSILGNRWSQIAARLPGRTDNEIKNFWNSCIKKKLKHNNNSIIKSATSTANSTMSMPMPAMSARTQPLDAMLARYQPSLRAIENQFCNPEVQRSKREQNQFEDSAANSMNSCQLWNTYSAQENFSHSLRSMNLQEPSQARLCDQISWSSNTQLPLNYTTIPALVDSEFISLKENHNNNNQNELMTACDNYHESSGLTAWSTSYSDNTENCNPVGNILCNAIAQPMEWAINEEKISYELPQGYDCSGINEKEEAGAAAGLNSLGGGDEFEFECEGASAVWQDNMYDIHTAACDLDQMYFT*	ATGAGCTGCACTACAGAGGCTAAACCTAAGCTCAGAAAAGGCCTCTGGTCGCCTGAAGAAGATGATAAGCTCATCAACTACATGATGAAAAATGGTCAGGGCTGTTGGAGCGACGTCGCCAAACAAGCTGGTTTGCAGAGATGTGGAAAGAGCTGTAGGCTGAGATGGATTAACTACCTGAGGCCTGACCTTAAACGGGGAGCATTTTCACCTCATGAAGAGCAATTGATTATTCACTTGCATTCCATTCTGGGTAACAGGTGGTCTCAAATTGCAGCCCGTTTGCCTGGGCGTACAGACAACGAGATCAAGAATTTCTGGAATTCCTGCATTAAAAAGAAGTTGAAACACAACAACAACAGCATCATTAAATCTGCCACCTCAACTGCTAATTCCACC…
TcMYB53	314	5.45	35604	MGRAPCCSKVSGFQRGAWTAQEDTILREYVTIHGEIGWGTLAKQTGLKRCAKSCRFRWLNYLRPGIKRGNISTDEEDLILRLHALLGNRWSLIAGRLPGRTDNEIKNYWNTHLSKKSLPQEKEAIKSKPAPPAGDCLFNSNVCHSNYMSPSDNSNRQELTPSDEEQIVRTSKLLSELMEEMMTEDDSHLMDLTMNKNSAELAYPSFDINNQCSPRCMPNLVDTQFRHSAPCTENEHYESLLHWNGLLSGNSDLLICPSDSPVDFRIQALDATPDNYLEQMSTENFTVAVDAGMVEFYKRAQQGDWASELRYVQT*	ATGGGGAGGGCTCCTTGCTGTTCTAAAGTTTCAGGGTTCCAACGCGGGGCCTGGACTGCGCAGGAGGATACAATTCTTAGAGAATACGTCACAATTCACGGCGAAATTGGATGGGGAACTCTCGCCAAACAAACAGGTCTGAAGCGGTGCGCCAAGAGTTGCAGATTCCGATGGCTGAACTATCTTCGTCCAGGCATTAAGCGAGGAAACATTTCGACGGATGAAGAGGATCTCATTCTTAGATTGCATGCACTTCTTGGGAATAGGTGGTCACTGATTGCAGGTAGACTGCCGGGTCGAACTGATAATGAGATCAAGAATTACTGGAACACTCATCTCAGTAAGAAGAGCCTGCCGCAAGAAAAGGAAGCTATTAAATCAAAGCCTGCCCCTCCTGCA…
TcMYB54	354	5.64	40082.1	MGRAPCCSKDSGINRGAWTAEEDMILSEYITIHGDGGWRALPKKAGLKRCGKSCRLRWLNYLRPDIKRGNISADEEELIIRLHRLLGNRWSLIAGRLPGRTDNEIKNYWNTQLIKKLKNSGSSAPNTKNINNRTSQSPSPREEDRHLWTTVPVRTTALRIAKSHVKLQSDGTELIDASRSRSQICVDELMIPNSDIDLSTTNNIAQSASPYMEINAQCSPISMSNLFDQEFAHSPAKNEVNISKSCFHLNEVSSLDIDLLSSPLNFAEDLVIQEFEVRPKNEMEEMCSLHTNYTQQNESFTVCNEKGIDELYNDICPLDWINELQYFKRSGLLEEGDCFERSNPPNSTVVKSVE*	ATGGGCAGGGCTCCTTGCTGTTCTAAAGATTCTGGGATCAATCGGGGGGCCTGGACTGCCGAGGAGGATATGATTTTGAGTGAATATATCACAATTCATGGGGATGGTGGATGGAGAGCTCTTCCCAAAAAAGCAGGGTTGAAGAGATGCGGAAAGAGTTGCAGATTGCGTTGGTTGAATTATCTCCGCCCTGATATCAAGCGAGGAAACATTTCAGCAGACGAAGAGGAGCTCATTATTAGACTCCATAGACTTCTTGGCAATAGGTGGTCACTGATAGCGGGGCGACTGCCAGGGCGAACAGACAACGAAATCAAGAATTACTGGAACACTCAATTGATTAAGAAGCTTAAAAACAGCGGATCCAGCGCTCCGAACACTAAAAACATCAACAACAGA…
TcMYB55	326	6.47	37288.1	MGRTPCCGKVGLKRGRWTAQEDEILTKYIQTHGEGSWRDMPKNAGLLRCGKSCRLRWINYLRSDLKRGNISAEEDELVIKLHGLLGNRWSLIAGLMQGRTDNEIKNYWNTHLSRKLSDRGIDPVTHKPFYYKFSTKGKKDTEPELSSRIESSTLLAELMKKDIKAEKPMKKKPVVITGTCKKKNRCHENGASNKTKATVEHLSSRISNQSSCQSLSDMNSDEIKLKMQSQDCNVSVQEKTEAPVLVEDEYPTTSLWEDTFSSNILPFPMDFFGSFDTEDLIMFDNQLPESNVTNNNMEDTTDDLWSSFPSNIEDFFIEPLWHGSFH*	ATGGGGAGGACACCTTGTTGTGGTAAGGTTGGACTGAAGAGGGGAAGATGGACTGCTCAAGAAGATGAGATATTGACTAAATATATACAGACCCATGGTGAGGGTTCTTGGAGAGACATGCCCAAAAATGCAGGTCTCCTGAGATGTGGAAAGAGTTGCAGGCTAAGATGGATCAACTATCTTCGTTCAGATTTGAAGAGAGGAAATATTTCTGCAGAAGAAGATGAGCTTGTCATCAAATTACATGGTCTATTAGGCAACCGATGGTCACTGATTGCAGGGCTAATGCAGGGCAGGACAGACAATGAGATTAAGAACTACTGGAACACTCATCTGAGCAGAAAGCTATCAGACAGAGGGATTGACCCAGTGACCCACAAGCCATTCTACTACAAATTT…
TcMYB56	400	6.28	44017.3	MGRAPCCDKVGLKKGPWTPEEDEKLISYIHKHGHGSWRALPQNAGLLRCGKSCRLRWTNYLRPDIKRGNFSVQEEQSIIQLHALLGNRWSTIATHLPKRTDNEIKNFWNTHLKKRLSKMGIDPITHKPKSESFNVGEGQSKSSSALSHMAQWESARLEAEARLTKQSRLRGKGLFTSHGTLPSTNTSIFSNVSWNKEKLQVSNRCLDVLNAKLLHGGGGNSNSSLLESPTSSLSFASQSEATPRSQFQFPIPSIDTLSEALAASEKKPLPDELARFLAEADNTTTTGGADVKSSNPPDSNLLLFPSLQDVMPLEEHCSSTPSVSSPEEQSMLASSHDDISTATTPSLEDCFNTDMLLDLAEAPACAELLEEQSSMNKDYWSNILNLVNSPEGHSPLHSF…	ATGGGTCGTGCACCGTGCTGCGACAAAGTGGGGTTGAAGAAAGGTCCCTGGACTCCAGAAGAGGACGAGAAGCTCATTTCCTACATTCACAAGCACGGCCATGGCAGTTGGAGAGCTCTTCCTCAGAATGCTGGTCTGTTGAGGTGCGGGAAAAGCTGTCGGCTTCGATGGACAAATTATCTGAGACCAGACATAAAAAGAGGAAATTTCAGCGTGCAGGAAGAGCAGTCTATTATCCAGCTCCACGCTCTGCTTGGCAACAGGTGGTCGACCATAGCTACGCATCTTCCAAAGAGGACGGACAATGAAATAAAAAACTTCTGGAACACGCATCTGAAGAAGCGGCTGTCGAAAATGGGCATAGATCCCATCACCCACAAGCCCAAATCGGAGTCGTTC…
TcMYB57	288	6.24	33518.2	MAPIPRHSFNRKIWSPEEDSLLTEYIRSHGEGHWTSLPLNAGLKRRGKSCRLRWFNYLHPNIKRGSFSGDEEELIIRLHRLLGNRWSLIAKRLPGRTDNDVKNYWNTHLCKQLRGKNNTSPSPFKKTRSKNCCWNSTVTEKAGKTNVVDIGESIKKCEPCENKTITETAGCFLHKYSVFCEEKNEEESYHDTVQHNSKQSHDEPVSICSEHEEEPHDYTVQQNLESHEEESHHYSPQQNLQSHEPVSTFSYNDLLQLGINSDMNNNLLYPYSISTFLSSDFCDFWESL*	ATGGCTCCAATCCCCAGGCATTCTTTCAACAGGAAGATATGGAGCCCTGAAGAAGATTCCTTACTCACTGAGTATATCAGATCCCATGGAGAAGGCCACTGGACCTCTCTTCCTCTTAATGCAGGTCTGAAGCGCAGAGGCAAAAGCTGCAGACTTCGTTGGTTTAATTATCTCCATCCCAACATCAAGCGTGGGAGTTTCTCAGGAGATGAAGAAGAACTCATCATTAGACTTCATCGTCTTCTTGGCAATAGATGGTCACTGATTGCAAAGAGGTTACCTGGTCGAACAGACAACGATGTGAAAAACTACTGGAATACTCACTTGTGCAAGCAGCTCAGAGGGAAAAACAACACGTCACCTTCTCCATTCAAAAAGACAAGGAGTAAAAACTGTTGT…
TcMYB58	246	7.07	28133.5	MGRAPCCDNGDRNKGAWTKEEDERLVHYIQSHGEGCWRSLPRAAGLLRCGKSCRLRWINYLRPDLKRGNFSEDEEDLIFKLHALLGNKWSLIAGRLPGRTDNEIKNYWNSHLKRKLLSRGFDSKTRRPFYKTTGHLSTEQNTITQPKIETDHEKYSGETVEDQIQSSTGDQCDQVIPSETHKEELPNLNLELSITSPSTYFPASDDVVRSNKETCHARLSSGNEDFNGLNSVGCYVDFPRTMLLLR*	ATGGGAAGAGCCCCCTGCTGTGACAATGGTGACAGAAACAAAGGAGCCTGGACCAAAGAAGAAGATGAAAGGCTTGTTCACTATATTCAATCCCATGGAGAAGGCTGTTGGCGCTCACTTCCCAGGGCTGCAGGTTTGCTTCGTTGTGGGAAAAGTTGCAGGCTGAGATGGATAAATTATCTTCGCCCTGACCTCAAGCGGGGTAATTTTTCTGAAGATGAAGAGGATCTCATTTTCAAACTGCATGCCCTTCTCGGGAATAAGTGGTCTCTCATAGCCGGTCGACTACCTGGACGAACGGACAACGAGATAAAAAACTACTGGAACTCCCATCTGAAAAGAAAACTGCTCAGCAGGGGTTTCGACTCGAAGACCCGTCGACCATTTTACAAAACGACC…
TcMYB59	239	8.98	27468.1	MRGGLNRGPWQPHEDLLLKTYLQLNGVGRWSTLPTKAGLNRCGKSCRLRWMNYLRPNLKRGRISADEEELIIRLHKLLGNRWSLIAARVPGRTDNDVKNFWNLHLRKQLASKDHDIQLNTPKLKAKETPSSSAMGTQMSSSSFVDQNLESNTLNVPIGWTAVPAESKQLEQPCNFNTVQLHQNSHAIFSEVMPDSDSFWFNCLPWLVSNDGDNFYCNYNTSYFTDVQPNNQFNVKDMWL*	ATGAGAGGAGGGCTGAACCGCGGGCCTTGGCAACCACACGAGGATCTGCTTTTGAAAACATATCTCCAACTTAATGGCGTGGGACGTTGGAGCACTCTTCCCACCAAAGCAGGTTTGAATCGGTGCGGAAAGAGTTGCAGGCTGCGGTGGATGAATTATCTCCGCCCAAATTTAAAGCGAGGACGTATTTCTGCTGACGAAGAAGAGCTCATCATAAGACTTCATAAACTGCTTGGTAACAGGTGGTCGTTGATTGCCGCACGTGTACCGGGAAGAACAGACAACGATGTAAAGAACTTCTGGAATCTTCATCTCAGAAAGCAACTGGCTTCCAAAGACCATGATATTCAACTCAACACCCCCAAGTTAAAGGCAAAAGAAACACCCTCCAGTTCCGCC…
TcMYB60	465	5.51	51944.5	MGRHSCCYKQKLRKGLWSPEEDEKLLRHITKYGHGCWSTVPKQAGLQRCGKSCRLRWINYLRPDLKRGSFTPHEENLIIELHALLGNRWSQIATQLPGRTDNEIKNLWNSCIKKKLRQRGIDPVTHKPLAEINGGDGEDNSDNKAATGSPSVAECNNLKHPDDLNVVSRNEVADNTAAFSNHMEDAMFDCHEMLANHQEIDSKVSSRKEMFLQKFNDSPVTSLADLNFMQLSAQVMNSHHKLTSLNPVLCLEAPLQGSCEIPNEITWSALHSKDTAENFTVDTNSDFAASSDFSDNNCMMGNPSLYNRPGPGLSSFLYSNRLVGNQDFLDNNYMNRAQTYWDNHSIAAASSSSISGNSSNNMEVNNGAAFYETSGHIWGLSEPTQPDGSDITSETELFQ…	ATGGGCCGCCATTCCTGTTGCTACAAGCAGAAGCTAAGAAAGGGCTTGTGGTCTCCCGAAGAAGACGAGAAGCTGTTGCGGCATATTACAAAATATGGGCATGGATGCTGGAGTACTGTGCCCAAGCAAGCTGGTCTCCAGAGATGCGGGAAAAGCTGCAGGCTGAGATGGATCAACTATTTAAGACCGGATCTGAAGCGTGGCTCGTTCACTCCACATGAAGAAAATCTTATCATCGAACTGCATGCTCTTCTTGGCAACAGGTGGTCTCAGATAGCTACCCAGTTGCCTGGAAGAACTGATAACGAGATTAAGAACTTGTGGAATTCATGCATTAAGAAGAAGCTGAGGCAACGCGGTATTGATCCTGTTACTCACAAGCCTCTTGCTGAAATCAAT…
TcMYB61	398	5.69	45374.9	MGRAPCCSKVGLHRGPWTAREDMLLTRFIEANGEGQWRALPKKAGLLRCGKSCRLRWMNYLRPDIKRGNISSDEEELVIRLHRLLGNRWSLIAGRLPGRTDNEIKNFWNTHLSKKLVRKGINPKTHQPLPNKKEARMSTDQVKNDECYVRKRNDRENDLKQVNADANKSHVQPVHLPKANRFIAFPRSSSNPELLPRTQSLSMNTSLECQANNVLLPPSIDLNSSSPVSSLNSTQDNSDYSSYLSPVEDCFSWPCIEEEEEEDWNVKCFPHAGEEEEEESWIPNSQLHDDHNAKCIISEKMSSIGHFASDQTTIPCRQINKPESCSNVNMLQEVYEEYLELLQEDPSPQTNNKIISDNDGKEDNNVSAFTEGGLPSMWDCLQQGLNLTVTVTRQEIFL*	ATGGGAAGAGCTCCATGCTGTTCAAAAGTGGGGCTGCACAGAGGACCATGGACTGCAAGAGAGGATATGTTGTTGACAAGGTTTATTGAAGCCAATGGAGAAGGACAATGGAGAGCTCTGCCCAAAAAAGCAGGACTTCTACGGTGTGGAAAGAGTTGCAGGCTTAGATGGATGAACTATCTAAGGCCTGATATCAAGCGTGGTAACATTTCTTCTGATGAAGAGGAACTTGTAATCCGGTTGCATCGATTGCTAGGAAATCGATGGTCATTGATTGCAGGAAGATTGCCGGGCCGAACAGATAATGAAATTAAGAATTTTTGGAACACACACCTGAGCAAGAAGCTGGTGAGAAAAGGGATTAACCCCAAAACCCATCAACCTCTGCCTAATAAAAAA…
TcMYB62	338	9.1	38927.8	MREYSFCSKEAGVEDCSPKLPETQTTCGRGHWRPDEDEKLKELVERFGPQNWNAIAEKLQGRSGKSCRLRWFNQLDPKINRRPFSEEEEQRLLACHRVHGNRWAIIARLFEGRTDNAVKNHWHVIMARRHREHSKVYGRRKMLQAIKNGSKFQHNYNNGSQCQNFLLKFDKHHHQPNGMCLFKHGSRSPIQLDFLGSHCKPENSSVDERNSTLLPYLGQSMRQAISISNASSMLFEGSGISNEVDSELERVQIHDCKRCDNSQSIGGHDLRSMLPFSSFPQKPGNIAYYNFLNINSQPNNVPQESRKKAEENKQYIESGVPFIDFLGVGKAHSYSNVI*	ATGAGAGAATATAGCTTTTGTAGTAAAGAAGCTGGAGTTGAGGATTGTAGCCCAAAATTGCCTGAAACACAAACAACCTGTGGAAGGGGACACTGGAGACCAGATGAGGATGAGAAGCTGAAGGAGCTTGTTGAACGATTCGGGCCACAGAATTGGAATGCCATAGCAGAGAAACTTCAAGGCAGATCAGGAAAAAGTTGCAGGCTACGATGGTTTAATCAGCTGGATCCGAAGATAAACAGACGTCCATTTTCAGAGGAGGAAGAACAGCGTCTGCTAGCTTGTCACCGCGTACATGGAAACAGATGGGCTATCATTGCAAGGCTATTCGAAGGAAGAACTGATAATGCTGTCAAAAATCACTGGCATGTTATCATGGCCAGAAGACACAGAGAACAC…
TcMYB63	403	8.51	45373.6	MLQEKEMGRRHVCCHKQKLKKGLWSPEEDEKLMCYITKYGHGRWSSVPKLAGLERCGKSCRLRWINYLRPDLKRGTFSSHEENLIIELHAALGNRWSQIATRLPGRTDNEIKNFWNSCIKKKLKEKGIDPSTHKSISEVAGASEDKSADNQQASSKAEELGANQDDRVRVNPTANNSSAFLHNEISGLNSFSHKSVSKGYNGSKSPNKLADGASSSNPHVWLFQGSTHPQIYGPMGIFNANQAEHSTIYKPINSEYTAYNNPMLSYSSLITAPYQATPRTSTRFSSLLSDRALPIQEESSHELIQHCDNHGQFWDSGEKNQSLMQPKLNSLEGSLKWSDLKWSDLFLSQTYDSTGKDHKGNNGVHWQLQESPNVIYEKPNPPLQHSNVSSDQLQHIASV…	ATGTTACAAGAGAAAGAAATGGGAAGACGCCACGTGTGTTGTCACAAGCAGAAGCTGAAAAAGGGCCTCTGGTCTCCAGAAGAAGATGAGAAATTAATGTGTTACATTACCAAATATGGCCATGGTCGTTGGAGTTCTGTGCCAAAGCTTGCAGGCCTAGAACGTTGCGGGAAGAGTTGCAGGCTGCGTTGGATAAACTACCTTAGGCCAGATCTGAAAAGAGGCACCTTTTCTAGCCATGAAGAGAACCTTATCATTGAACTTCATGCAGCCCTTGGAAACAGATGGTCGCAGATAGCTACACGATTACCAGGGAGAACTGATAACGAGATAAAGAACTTCTGGAACTCGTGCATCAAGAAGAAGCTCAAGGAAAAGGGCATAGATCCCAGCACCCAC…
TcMYB64	400	9.16	43187.7	MAEKGTADRIKGPWSPEEDALLQRLVLKYGARNWSLISKGIHGRSGKSCRLRWCNQLSPQVEHRPFTPDEDAAIVQAHARHGNKWATIARYLTGRTDNAIKNHWNSTLRRRSQELNHASGGGNDDNSSSLKRSSCSNDDGSSTLVEENCGREADSKRRKSQGNYVPEEPKPAAQLVYRPVPLTSCGFLKPQQEAATVSSSASVDPPTSLSLSLPGFEPPTTPSSKPVETENRKDAPLPVPVVPVPVPVPVAVPAAVPVTVPVSVQVPAPTSTFGYVRAEEAMTWMNAVVRATVAQTLAPILNCSPRGSPSDHGPPVTGDILAVMREMIAKEVQKYMSANNNHPSHHHHPPPPPLAPAYSYSYTIPTVYTPLSAHSMGAFRPSNVVLGGHHLSKPVSDLG…	ATGGCTGAGAAAGGCACCGCGGATCGGATTAAGGGGCCGTGGAGCCCCGAGGAGGACGCGCTTTTGCAGAGGCTGGTGCTGAAATACGGGGCGAGGAACTGGTCGCTTATCAGTAAGGGCATCCATGGGCGGTCGGGGAAATCCTGTAGGTTGCGATGGTGCAACCAGCTGAGCCCCCAGGTGGAGCATCGCCCGTTTACCCCCGATGAAGACGCCGCCATTGTTCAGGCGCATGCCAGGCATGGTAACAAATGGGCGACGATCGCCCGCTATTTGACCGGGCGCACCGACAACGCTATTAAAAACCACTGGAACTCCACTCTGCGGCGGCGCTCCCAGGAATTGAACCACGCTTCTGGCGGCGGTAACGATGACAACAGCAGCAGTTTGAAGCGCAGC…
TcMYB65	214	7.75	25249.3	MYEQEEEKIRKGPWTVQEDMRLVNYITLNGEGRWNFLAKAAGLRRSGKSCRLRWVNYLRPDLKRGNITPQEERLIIDLQSRWGNRWSRIAQYLPGRTDNEIKNHWRTRIKRKFNAGNRPSQHSMCSTCMPDQFIEQNDGAEKDRTPQSNIPQNHTVFHFDEQRNSNGVNEFNGNKSGLFETLAMPFQMESYADMLSELHEFLMEDGNLSPFTEF*	ATGTATGAGCAGGAAGAAGAGAAGATAAGGAAAGGTCCATGGACTGTACAGGAGGATATGAGGCTTGTTAACTACATAACTCTGAATGGCGAAGGCCGCTGGAATTTTCTAGCCAAAGCTGCAGGGCTGAGGAGAAGTGGGAAAAGCTGCAGGTTGAGATGGGTAAACTATCTCCGGCCAGATCTCAAGAGAGGAAACATTACTCCACAGGAAGAACGTCTTATCATAGACCTCCAAAGCCGTTGGGGCAACAGGTGGTCTCGAATTGCACAGTATTTACCTGGTCGAACAGATAATGAAATCAAGAACCACTGGAGGACGAGGATCAAAAGAAAGTTTAACGCTGGAAATAGACCTTCACAGCATTCAATGTGTTCTACCTGTATGCCAGACCAATTC…
TcMYB66	220	8.59	25349	MGRAPCCDKMGIKKGPWSGEEDRKLVAYIRKYGHGNWRALPMQAGLMRCGKSCRLRWNNYLRPDLKRGNFTLHEEQTIVQLHQIVGNRWAKIASFLPGRTDNDIKNVWNTRLKKCLNNVTTLPEKFEENFCDESNFVRAETDANSFLGQRNSEMEQQLFIRSAYCNSLKPSIPAEENIEVLGFNTVESDKKMRSVADYINSLKLILDINDEDISHANLMC*	ATGGGAAGAGCTCCGTGCTGTGATAAAATGGGGATCAAGAAAGGGCCGTGGAGTGGTGAAGAGGATAGGAAGCTCGTCGCCTACATACGCAAATACGGGCATGGAAACTGGCGGGCTCTGCCCATGCAAGCAGGACTTATGCGGTGTGGGAAGAGTTGCAGACTGAGATGGAATAATTATCTCAGACCCGATCTCAAACGTGGAAATTTTACTCTCCATGAAGAACAGACAATTGTTCAGCTTCACCAAATTGTAGGCAATAGGTGGGCGAAAATCGCGTCGTTTCTGCCCGGAAGAACAGACAACGACATTAAAAATGTATGGAACACTCGTCTCAAGAAGTGTTTGAATAATGTTACAACGTTGCCGGAGAAATTCGAGGAAAATTTTTGTGATGAA…
TcMYB67	257	6.59	29347.1	MVCRSCCQQQKPKRGLWSPDEDRKLCDYIATNGHQGCWSSLPKLAGLQRCGKSCRLRWLNYLRPGLKRGAISFMEENIIIEAHAALGNRWSLIANLLPGRTDNEIKNFWNSWLKKKLIFMGIDPYYRRPNDSCSASHVYKINTCSRKQKSFYFDRQTTVVKNDFFTVNSEALNGGIPSTQTTYPISNCNDEDAVKPLETETASNHVNLLLQPARDKSDFVTDSHVEKDCGETLTLGDFDDFGDILNWNELHALIEED*	ATGGTTTGCAGATCTTGTTGTCAGCAACAAAAACCGAAAAGGGGACTGTGGTCCCCTGATGAGGATAGGAAATTATGTGATTACATCGCAACCAATGGTCATCAAGGATGTTGGAGCTCCTTACCCAAATTAGCAGGCCTGCAGAGATGTGGGAAAAGTTGCAGACTTCGATGGTTAAACTACCTGAGACCAGGCCTCAAACGAGGCGCAATATCATTTATGGAAGAAAACATTATCATCGAAGCACATGCAGCCCTCGGAAACAGGTGGTCCTTGATCGCGAATCTACTTCCTGGGCGAACAGATAACGAAATTAAAAATTTCTGGAACTCGTGGTTGAAGAAGAAGCTCATATTTATGGGTATTGATCCCTACTATCGCAGGCCCAATGATTCATGC…
TcMYB68	229	9.79	27726.6	MNEYVPEKIETNENNSHHAKENCSESRNFLRGHWRPAEDEKLRELVRQHGPQNWNFIADKLHGRSVCYAGKSCRLRWYNQLDPCINRMPFTEKEEERLLVAHRLHGNKWAMISQFFPGRTDNAVKNHWHVVMARKFRERSRIYGKRKSWHFLKKETATTRHPADHIRQTSVNIFENRYNRQKPQGLMFNPSMKTHYRTERILDMNSRGRDSYCRFLCMLWFDLSYQLVC*	ATGAATGAATATGTGCCTGAGAAAATCGAAACAAATGAGAACAACTCTCATCATGCAAAAGAAAATTGTTCAGAGTCCAGAAATTTTCTGAGGGGTCACTGGAGACCAGCTGAAGATGAGAAACTCAGAGAACTCGTGCGGCAGCATGGCCCTCAAAATTGGAATTTCATTGCTGATAAACTCCATGGGAGATCAGTTTGTTATGCAGGAAAGAGCTGCAGGTTGAGATGGTATAACCAGCTGGATCCGTGCATCAATCGCATGCCCTTCACAGAAAAAGAGGAGGAACGACTTTTAGTCGCCCATAGATTACATGGCAATAAATGGGCCATGATCTCCCAGTTTTTTCCAGGCCGAACAGACAATGCTGTGAAAAACCACTGGCACGTTGTTATGGCC…
TcMYB69	262	4.52	29438.6	MHRLLGNRWALIAGRLPGRTDNEIKNYWNTHLSKKLAMSTSSAFISRIPLPLQKYNSFPPLEKLSSPSLNFSEDDRAEPCEVSSASYNEVSSGVLVETMETSIGGQEEALLDVFKTWSELLEDSLMAEDSQIHDSNFISSSKSKDCNPFSLPYTDFGLIENFSVESLLQPEPYGLENMCHTHDNSSDNVNHADCLANNVAEQGFAEDVQQEQHCAEQEKQVDLAPFGHMFYHGKNWEEGVDLPCLTKTRGEEYLDILVDIPN*	ATGCATCGCCTCCTCGGTAATCGATGGGCACTTATTGCTGGGCGGTTACCTGGAAGAACTGATAATGAAATAAAGAATTACTGGAATACTCATTTGAGCAAGAAGCTTGCAATGAGTACAAGTTCTGCCTTTATTTCTAGAATCCCTTTGCCACTTCAAAAATATAATAGTTTTCCACCCTTGGAAAAACTGAGCTCTCCTTCCTTGAATTTCAGTGAAGATGACAGGGCCGAACCTTGTGAAGTGAGCTCGGCTTCTTATAATGAAGTGAGTAGCGGTGTTCTAGTGGAAACAATGGAGACATCCATTGGCGGCCAGGAAGAAGCTTTATTGGATGTCTTTAAAACATGGAGCGAGTTATTAGAGGATTCACTCATGGCAGAGGATTCACAAATACAT…
TcMYB70	321	9.41	36342.9	MIARLFPGRTDNAVKNHWHVIMARKFRERSRIFGKRKSCNLIRKVTATTRNSADHIEQTSIADRYPRRKPHGIMFDPFSIETHCSRSTTKPILDNSQGKALPAEGEDYFNRMMSKYNVQSIKHFTDVWPPQFPLRTSASSWPTIFSSFVISKPPDSAQPERAGYIRPIGSDDRFKGHVKLAQVNDHHVSLFPHRNTDHECASKDKKGEDTSQAAINLSSSSSNISRTGGLLGVNNTHTYDCASLRKMKLAPFNHAYNRINEKPVENKESDAHQTECADLTKRRMDVELSWCDSIERKHEEQGGCKVTANAPFIDFLGVGTS*	ATGATCGCCCGCCTGTTTCCAGGCCGAACAGACAACGCTGTAAAAAACCACTGGCATGTTATTATGGCAAGAAAATTTAGAGAGAGGTCTCGAATCTTTGGCAAAAGGAAGTCTTGCAATTTGATAAGAAAGGTAACTGCAACTACAAGGAACTCAGCAGATCACATTGAACAAACATCGATTGCAGACAGATATCCTAGACGAAAACCTCATGGGATCATGTTTGATCCATTTTCTATAGAAACCCATTGCAGCCGGAGCACCACAAAACCAATATTAGACAATTCACAAGGGAAAGCTCTACCGGCGGAGGGGGAGGATTATTTCAACAGAATGATGAGTAAATATAATGTTCAATCTATAAAACACTTTACAGATGTTTGGCCTCCCCAATTCCCC…
TcMYB71	268	4.76	28911.6	MPGRTDNEIKNYWNTHLSKKLITQGIDPRTHKPLSVISEESDVSPNSQPKNSPGTSEDQKETAAAVTEVEEGGSAPCPQDIRGKQNIVTDNTGSFSQVINTNSGRLGGVAHENEAYFTSKEAFFNGEWNSSTEDAPCQKHQVSQGLQTLEMELRNSGIVPAYNKLNNNTNCTGAAAAAAANGFSFPFPYPVTTVTCMGSAFGDCNSDYMFSSLLESFGNEELQVSEATAAASAPHEPCPLNQHDHPANLSYDLWSLLSPTMSQYHPST*	ATGCCCGGGCGGACGGACAACGAGATAAAGAACTACTGGAACACACACCTCAGCAAAAAACTCATCACGCAGGGCATCGATCCGCGCACTCACAAGCCACTTTCCGTAATCTCCGAGGAGAGTGACGTCAGCCCTAATTCACAGCCGAAGAACTCTCCCGGGACATCAGAAGATCAAAAGGAGACTGCGGCGGCTGTAACCGAGGTCGAAGAAGGTGGATCGGCTCCGTGCCCTCAAGACATTAGGGGCAAACAAAATATTGTTACAGATAACACAGGAAGCTTCTCTCAGGTAATTAATACTAATTCTGGACGCCTGGGAGGGGTAGCTCATGAAAATGAAGCTTATTTTACAAGCAAAGAAGCTTTCTTTAATGGAGAATGGAACTCAAGTACAGAG…
TcMYB72	1110	5.54	121781	MRIELGRGKARRAEMEVEQEQGSAQAETAKTTAELDRAVVAVMLKPKKGRPRKDKEHVLEQGQQMRMDYGQGVELGKEELEGTGVRRDGGSSAKNDKNNGASCSSQSVESLDIDSPVKGLPPVKGPTGGPQRRSSKGGWTEEEDEILRRAVQCYNGKNWKRIAQYFPNRTDVQCLHRWQKVINPNLIKGPWTKEEDNKIVELVQKYGVKKWSFISQFLPGRIGKQCRERWFNHLNPEIKKDAWSQEEELALIRAHQVYGNKWAEIAKYLPGRTDNAIKNHWHSSAKRKIASYLASGLLAELPELPGFDLPMVSFSGVEVSTPMPASGPFMEELSNFNLQSPCKRTNLPVSVDRAVTAEQCGHKRSDMHKTTDTWKLGNRLDNLFNTTLSPISKADYCML…	ATGAGAATTGAGCTGGGAAGGGGAAAGGCAAGGAGAGCAGAGATGGAGGTGGAACAGGAGCAGGGGTCTGCACAAGCAGAGACAGCGAAAACAACAGCTGAATTGGACAGGGCAGTAGTAGCAGTGATGCTGAAGCCGAAGAAAGGAAGGCCGAGGAAGGATAAAGAGCATGTGTTAGAGCAGGGGCAGCAAATGAGAATGGATTATGGACAGGGAGTGGAATTGGGGAAAGAAGAATTGGAAGGGACAGGTGTGCGTAGAGATGGTGGAAGTAGTGCTAAGAATGATAAAAATAATGGAGCTTCATGTTCTTCTCAGTCTGTGGAGAGTCTTGACATTGACAGTCCTGTGAAGGGGTTGCCTCCGGTTAAAGGTCCGACAGGTGGTCCTCAAAGGCGT…
