# Supplementary material for: The R2R3-MYB transcription factor family in Taxus chinensis: identification, characterization, expression profiling and posttranscriptional regulation analysis
Source: PeerJ journal article supplement (doi:10.7717/peerj.8473), 2020-02-17
Supplement: Table_S2.pdf [file Table_S2.pdf]

Table S2. Primers used for qRT-PCR analysis of *TcMYB* genes and miRNAs

| Name     | Sequence(5' to 3')        |
|----------|---------------------------|
| TcActinF | AAGAGAAGCTTGCTTATGTAGC    |
| TcActinR | TCTGATATCCACATCAACTTC     |
| TcMYB1F  | TGTCTATGATGTCCGCTGCC      |
| TcMYB1R  | GCGATCATTTCCTCGCATGAC     |
| TcMYB2F  | TCCGTGGGCAGATCAAGATG      |
| TcMYB2R  | GCCTCCAGACCAAGACAAC       |
| TcMYB3F  | TGAGTAGCAACCAACCCTGT      |
| TcMYB3R  | ATGTCGCTCCAACGAATCCA      |
| TcMYB4F  | TACCCCTTTACCCACCGGAT      |
| TcMYB4R  | GGAGGACCGGACAGAAACTC      |
| TcMYB5F  | CGATCCGAGAATCAACCGCA      |
| TcMYB5R  | TCGGTTCGACCAGGAAACAA      |
| TcMYB6F  | CCGGCAGGAACAGAGCATT       |
| TcMYB6R  | TAGACATAGCGTCCTCCGCT      |
| TcMYB7F  | GCCCAGCCAAGTACAGAGAT      |
| TcMYB7R  | CAACAAGCTGCACCCACAC       |
| TcMYB8F  | CACGTTATGCACCAGCTCCT      |
| TcMYB8R  | GAGAGGCCAGGAAGCCATTA      |
| TcMYB9F  | TACGCTGGAGCCTGAACTTG      |
| TcMYB9R  | CACTGGTGCAGAGGGTACAT      |
| TcMYB10F | GAATCCTGCAACGAAGACATGCCT  |
| TcMYB10R | CACCGTCAGTATCGTGCTGTGGA   |
| TcMYB11F | GAGCAGCTGTGTTGGTTGTG      |
| TcMYB11R | AGAGGCGGATTGAGAGCAAC      |
| TcMYB12F | GGTTGGGCACGACACCTTTA      |
| TcMYB12R | TGGAGTCTGTGCCTCCCTTA      |
| TcMYB13F | TATCCTCTGACAGCCACCT       |
| TcMYB13R | ATTCCACTCATCCCTTGGGC      |
| TcMYB14F | GTGTAGACCAAGCTGAGACGCA    |
| TcMYB14R | CGGAATTCTCGAAGTAATCTGCT   |
| TcMYB15F | GGTGCAGTTCAACCCAGGAA      |
| TcMYB15R | TCCTGCTTCCATCTGTGACG      |
| TcMYB16F | ATGCCAAGGAAGCATCGACT      |
| TcMYB16R | CCTCCTGGAACACTGAGCTG      |
| TcMYB17F | GATGCATCTCCATAACAATCCTGCA |
| TcMYB17R | GTGTAGCAGATACGAATGGCGTGT  |
| TcMYB18F | GCATTCGCTTTGATGGGCTT      |
| TcMYB18R | GGACGAAACTACCATCCCCG      |
| TcMYB19F | GCCTGAACAGAATGGGTGGA      |
| TcMYB19R | TGCTGTGTCTGAGACGTGAA      |
| TcMYB20F | TTCTCAGCATGGTCCTGGTC      |
| TcMYB20R | GAATCTGTGGTCACCTGGCT      |
| TcMYB21F | GACGGAGGCTTCCATGAGTT      |
| TcMYB21R | ACACCTGCACCAAAGGACAT      |
| TcMYB22F | CATGGTCATGCTGATCATAATCA   |
| TcMYB22R | GGATGATGTCTGACCATGAATTA   |
| TcMYB23F | AAGCATTTCCTGGACGAAC       |
| TcMYB23R | TGTGATACTTGTGGGCTGGTT     |
| TcMYB24F | GATCATGGCTATGGACCTTCACT   |
| TcMYB24R | CTATTGCTGGTTCGTGATGATA    |

|          |                         |
|----------|-------------------------|
| TcMYB25F | CTTCGCCTGATTCTCCCACC    |
| TcMYB25R | AATCCGCACCAGTGACAGTT    |
| TcMYB26F | TGTGGAAAGAGTTGCAGGCT    |
| TcMYB26R | AGAGTGAAGGCAGATGATGGC   |
| TcMYB27F | GCTTTCAAACACCAGCCAGG    |
| TcMYB27R | TGGTCTTGTCGAGGACATTGG   |
| TcMYB28F | GCTCCTCGCCTTCTGTAACT    |
| TcMYB28R | TTGCCTGTTAGGAGCCGAAT    |
| TcMYB29F | AGGCGCAATGCAGAAACATC    |
| TcMYB29R | CATCTGCTGCTAGGTTGGGA    |
| TcMYB30F | TGGCGCTCACATCTACAGAC    |
| TcMYB30R | AGGCTTTGAGTTGCTGGTCA    |
| TcMYB31F | GCTCCTCGCCTTCTGTAACT    |
| TcMYB31R | TTGCCTGTTAGGAGCCGAAT    |
| TcMYB32F | TCCTATGTCTGCCCATCCAG    |
| TcMYB32R | ATCAGTGCCGTCACAGTCAT    |
| TcMYB33F | ACGGTGGCGCTCATATCTAC    |
| TcMYB33R | GGAGAGGCTTAGACACGTCG    |
| TcMYB34F | GCAGCGTCGAAACGTCAAAT    |
| TcMYB34R | CTCGTTGGATTCCCAGCAGT    |
| TcMYB35F | TGTGATCCCGTCACTCCTCT    |
| TcMYB35R | TCAGTCTTGGTGTGTTGCCCC   |
| TcMYB36F | GGGTGGTGGTGGGATTAAGG    |
| TcMYB36R | AGAGGAGTGACGGGATCACA    |
| TcMYB37F | TGCCCAGCAGCAAGTTTTTC    |
| TcMYB37R | TCATCATCAGCATGGCCTCG    |
| TcMYB38F | CCGATCTCAGGGTTCACCAG    |
| TcMYB38R | TGGAGGGATTGTACTGCACC    |
| TcMYB39F | CTGATAGCCAATTGGAAGGCCT  |
| TcMYB39R | CTGATTCATATAACTGAGCTGGT |
| TcMYB40F | CTTCGCCTGATTCTCCCACC    |
| TcMYB40R | AATCCGCACCAGTGACAGTT    |
| TcMYB41F | GAATTGCGCAGCGTTTACCT    |
| TcMYB41R | GGGCATCGATTTCCTTCGCT    |
| TcMYB42F | TAGGTGGTCACTGATAGCGG    |
| TcMYB42R | TGGATTGGGGACACTGTTTGT   |
| TcMYB43F | GGTGCAGTTCAACCCAGGAA    |
| TcMYB43R | GCTTCCATCTGTGAGGCCAT    |
| TcMYB44F | GGGATCCACACTCTCCTCCA    |
| TcMYB44R | TTGAAGACCAGGCATCCACC    |
| TcMYB45F | GCGTCGTTGAAAAGTGGTGA    |
| TcMYB45R | GATTTCCCCGATCTCCCAGG    |
| TcMYB46F | GGTGGTGGTGGGATTAAGCA    |
| TcMYB46R | ACCCAGAGGAGTGATGGGAT    |
| TcMYB47F | GATGAAGAGGCAAGAACAGAGTT |
| TcMYB47R | CAGTGAACAGTGATACTGGTCCA |
| TcMYB48F | GCCGTTATAGTGAAGCCCA     |
| TcMYB48R | CGTTCAAAGGCAGAAGCGAG    |
| TcMYB49F | GCCTGAACAGAATGGGTGGA    |
| TcMYB49R | TGCTGTGTCTGAGACGTGAA    |
| TcMYB50F | GGCTGAGACAAGCTCATCGT    |
| TcMYB50R | AGTGCAGTACACGATTGGGA    |
| TcMYB51F | CTCGTCGTGAAGAAGCTCGT    |
| TcMYB51R | GTCTGGCACCATGATTGGGA    |

|                |                          |
|----------------|--------------------------|
| TcMYB52F       | GCCGATGGAATGGGCTATCA     |
| TcMYB52R       | TCGAACTCGAACTCGTCACC     |
| TcMYB53F       | GTCCATCTGATTCTCCCGTAGAT  |
| TcMYB53R       | CATGTCTGCACATACCGCAATT   |
| TcMYB54F       | TGTGAGAACAACCTGCGCTGA    |
| TcMYB54R       | CCACGCATATCTGAGACCGT     |
| TcMYB55F       | GATTGCAGGGCTAATGCAGG     |
| TcMYB55R       | TGTGGGTCCTGGGTCAATC      |
| TcMYB56F       | CACTGTTCCAGCACTCCCTC     |
| TcMYB56R       | ATCGAGCAGCATGTCTGTGT     |
| TcMYB57F       | CCTGGTCGAACAGACAACGA     |
| TcMYB57R       | GCCTTCTCTGTCACCGTACT     |
| TcMYB58F       | GCGATCAATGCGACCAGGTA     |
| TcMYB58R       | GTGAGCGTGACAGGTTTCT      |
| TcMYB59F       | GTCGACCAGAATCTTGAGAGTA   |
| TcMYB59R       | GTTATTCGGCTGCACATCGGTAA  |
| TcMYB60F       | GCAACAACATGGAGGTCAACAA   |
| TcMYB60R       | CTGTCGTAGGATGGATCAGTTA   |
| TcMYB61F       | GTTACAAGAGGACCCCAGCC     |
| TcMYB61R       | TGCTGCAGACAATCCCACAT     |
| TcMYB62F       | CCAGCCTAATGGCATGTGCT     |
| TcMYB62R       | CTTGTGCGCATGCTTTGACCC    |
| TcMYB63F       | GCCAATCAAGCTGAACACTCG    |
| TcMYB63R       | CTGGTGCTTGTTTCGAGGAGT    |
| TcMYB64F       | TACGCCGTTGTCTGCTCATT     |
| TcMYB64R       | CCTGACCTCCTGTTCATCGG     |
| TcMYB65F       | GATAGGACACCGCAGAGTAACAT  |
| TcMYB65R       | CTCCAATGTATCTGTTTCGGTTGA |
| TcMYB66F       | AAGCTCGTCGCCTACATACG     |
| TcMYB66R       | TCCACGTTTGAGATCGGGTC     |
| TcMYB67F       | CAGAAGCTCTTAATGGAGGTAT   |
| TcMYB67R       | CTTCTTCTATCAACGCATGGAGT  |
| TcMYB68F       | CACTGGAGACCAGCTGAAGATGA  |
| TcMYB68R       | CCATAACAACGTGCCAGTGGTT   |
| TcMYB69F       | GTCACACCCACGATAACTCCT    |
| TcMYB69R       | ACAATGTTGTTCTGCTGCAC     |
| TcMYB70F       | CGTCCAATTGGTTCAGATGATAGA |
| TcMYB70R       | CTGAGTGATGCGCAATCATATGT  |
| TcMYB71F       | AACCGAGGTCGAAGAAGGTG     |
| TcMYB71R       | CCCAGGCGTCCAGAATTAGT     |
| TcMYB72F       | TGAGGGCAACCATGAAAGCA     |
| TcMYB72R       | TTGAGATGCAGGGTAAGCCG     |
| 5.8SrRNA       | GCGATACTTAGTGTGTGAATTGCA |
| miR828         | TCTTGTTCAAATGAGTATTCT    |
| miR858         | TTCGTTGTCTGTTTCGACCTTA   |
| miR159         | TTTGGTTTGAAGGGAGCTCTA    |
| Reverse primer | GCGAGCACAGAATTAATACGAC   |
