# Supplementary material for: The R2R3-MYB transcription factor family in Taxus chinensis: identification, characterization, expression profiling and posttranscriptional regulation analysis
Source: PeerJ journal article supplement (doi:10.7717/peerj.8473), 2020-02-17
Supplement: Table_S3.pdf [file Table_S3.pdf]

## The sequence identity of the 72 TcMYBs with Arabidopsis MYBs

| Query  | subject   | Identities | length | mismatch | gap | Query start | Query stop | subject start | subject stop | Expect   | score |
|--------|-----------|------------|--------|----------|-----|-------------|------------|---------------|--------------|----------|-------|
| TcMYB1 | ATMYB44   | 40.67      | 359    | 209      | 10  | 31          | 1095       | 2             | 285          | 7.00E-69 | 212   |
| TcMYB1 | ATMYB77   | 42.14      | 318    | 180      | 10  | 31          | 972        | 2             | 285          | 2.00E-66 | 206   |
| TcMYB1 | ATMYB73   | 37.78      | 352    | 219      | 7   | 34          | 1089       | 10            | 283          | 7.00E-63 | 197   |
| TcMYB1 | AtMYB109  | 45.07      | 213    | 109      | 5   | 37          | 651        | 54            | 257          | 2.00E-54 | 177   |
| TcMYB1 | AtMYB70   | 74.53      | 106    | 27       | 0   | 34          | 351        | 10            | 115          | 2.00E-53 | 172   |
| TcMYB1 | AtMYB1    | 41.63      | 233    | 125      | 5   | 34          | 699        | 52            | 262          | 2.00E-50 | 167   |
| TcMYB1 | ATMYB25   | 64.08      | 103    | 37       | 0   | 37          | 345        | 48            | 150          | 5.00E-45 | 152   |
| TcMYB1 | ATMYB105  | 48.76      | 121    | 62       | 0   | 43          | 405        | 107           | 227          | 4.00E-39 | 135   |
| TcMYB1 | ATMYB54   | 46.15      | 130    | 68       | 1   | 43          | 426        | 6             | 135          | 2.00E-38 | 131   |
| TcMYB1 | ATMYB69   | 45.52      | 134    | 69       | 1   | 43          | 432        | 19            | 152          | 6.00E-38 | 130   |
| TcMYB1 | AtMYB117  | 54.9       | 102    | 46       | 0   | 43          | 348        | 98            | 199          | 1.00E-37 | 132   |
| TcMYB1 | AtMYB56   | 36.46      | 192    | 122      | 1   | 43          | 618        | 93            | 278          | 6.00E-37 | 129   |
| TcMYB1 | ATMYB52   | 50.5       | 101    | 50       | 0   | 43          | 345        | 5             | 105          | 2.00E-36 | 125   |
| TcMYB1 | AtMYB98   | 56.73      | 104    | 45       | 0   | 40          | 351        | 216           | 319          | 3.00E-36 | 129   |
| TcMYB1 | AtMYB64   | 33.48      | 230    | 151      | 4   | 40          | 723        | 104           | 320          | 3.00E-35 | 127   |
| TcMYB1 | ATMYB119  | 51.33      | 113    | 55       | 0   | 40          | 378        | 104           | 216          | 1.00E-34 | 125   |
| TcMYB1 | ATMYB118  | 46.4       | 125    | 65       | 1   | 31          | 399        | 185           | 309          | 8.00E-34 | 123   |
| TcMYB1 | AtMYB115  | 37.13      | 167    | 105      | 1   | 43          | 543        | 158           | 318          | 2.00E-32 | 118   |
| TcMYB1 | ATMYB46   | 37.22      | 180    | 104      | 4   | 43          | 555        | 20            | 199          | 2.00E-32 | 116   |
| TcMYB1 | AtMYB82   | 36.13      | 191    | 111      | 6   | 43          | 582        | 14            | 194          | 4.00E-32 | 113   |
| TcMYB1 | ATMYB61   | 35.64      | 202    | 125      | 5   | 43          | 633        | 14            | 206          | 9.00E-32 | 116   |
| TcMYB1 | ATMYB35   | 31.05      | 248    | 150      | 6   | 43          | 723        | 14            | 261          | 1.00E-31 | 115   |
| TcMYB1 | ATMYB14   | 43.61      | 133    | 73       | 3   | 43          | 435        | 14            | 142          | 1.00E-31 | 113   |
| TcMYB1 | ATMYB121  | 49.54      | 109    | 53       | 2   | 43          | 363        | 29            | 136          | 2.00E-31 | 113   |
| TcMYB1 | ATMYB80   | 47.71      | 109    | 56       | 1   | 43          | 366        | 14            | 122          | 2.00E-31 | 114   |
| TcMYB1 | ATMYB110  | 47.17      | 106    | 56       | 0   | 43          | 360        | 67            | 172          | 2.00E-31 | 114   |
| TcMYB1 | ATMYB72   | 37.7       | 183    | 105      | 6   | 43          | 564        | 16            | 188          | 3.00E-31 | 113   |
| TcMYB1 | AtMYB45   | 40.12      | 162    | 91       | 4   | 43          | 510        | 20            | 171          | 6.00E-31 | 111   |
| TcMYB1 | ATMYB92   | 51.46      | 103    | 48       | 2   | 43          | 345        | 14            | 115          | 7.00E-31 | 113   |
| TcMYB1 | ATMYB95   | 38.82      | 152    | 90       | 3   | 43          | 489        | 14            | 164          | 8.00E-31 | 111   |
| TcMYB1 | ATMYB67   | 31.14      | 228    | 150      | 6   | 43          | 705        | 24            | 227          | 8.00E-31 | 112   |
| TcMYB1 | ATMYB37   | 43.7       | 135    | 74       | 3   | 43          | 441        | 14            | 146          | 1.00E-30 | 112   |
| TcMYB1 | ATMYB58   | 40.76      | 157    | 91       | 5   | 43          | 507        | 16            | 161          | 2.00E-30 | 110   |
| TcMYB1 | ATMYB101  | 33.19      | 229    | 125      | 5   | 43          | 645        | 20            | 244          | 2.00E-30 | 114   |
| TcMYB1 | AtMYB74   | 42.54      | 134    | 76       | 1   | 43          | 441        | 15            | 148          | 2.00E-30 | 111   |
| TcMYB1 | AtMYB41   | 44.8       | 125    | 68       | 1   | 43          | 414        | 14            | 138          | 3.00E-30 | 110   |
| TcMYB1 | AtMYB17   | 39.1       | 156    | 93       | 4   | 43          | 504        | 14            | 160          | 3.00E-30 | 110   |
| TcMYB1 | ATMYB102  | 32.04      | 206    | 139      | 2   | 43          | 657        | 14            | 216          | 3.00E-30 | 111   |
| TcMYB1 | AtMYB36   | 38.89      | 144    | 86       | 3   | 43          | 468        | 14            | 151          | 3.00E-30 | 111   |
| TcMYB1 | ATMYB86   | 35.35      | 215    | 125      | 6   | 43          | 645        | 14            | 223          | 5.00E-30 | 111   |
| TcMYB1 | ATMYB59-3 | 36.67      | 150    | 93       | 3   | 43          | 486        | 10            | 146          | 5.00E-30 | 108   |
| TcMYB1 | AtMYB19   | 35.27      | 207    | 127      | 6   | 43          | 642        | 14            | 205          | 5.00E-30 | 109   |
| TcMYB1 | AtMYB97   | 53.47      | 101    | 46       | 1   | 43          | 342        | 21            | 121          | 6.00E-30 | 111   |
| TcMYB1 | ATMYB63   | 32.88      | 222    | 116      | 6   | 43          | 609        | 16            | 236          | 6.00E-30 | 109   |
| TcMYB1 | ATMYB48   | 37.76      | 143    | 86       | 3   | 43          | 462        | 9             | 150          | 1.00E-29 | 108   |
| TcMYB1 | AtMYB27   | 39.38      | 160    | 90       | 5   | 43          | 501        | 11            | 161          | 1.00E-29 | 107   |
| TcMYB1 | ATMYB13   | 40.54      | 148    | 86       | 3   | 43          | 480        | 14            | 159          | 2.00E-29 | 107   |
| TcMYB1 | ATMYB34   | 47.71      | 109    | 56       | 1   | 43          | 366        | 14            | 122          | 2.00E-29 | 108   |
| TcMYB1 | AtMYB107  | 49.02      | 102    | 51       | 1   | 43          | 345        | 14            | 115          | 3.00E-29 | 108   |
| TcMYB1 | ATMYB106  | 30.47      | 256    | 168      | 6   | 43          | 780        | 57            | 283          | 3.00E-29 | 109   |
| TcMYB1 | ATMYB28   | 31.71      | 246    | 166      | 6   | 43          | 774        | 14            | 233          | 3.00E-29 | 109   |
| TcMYB1 | AtMYB79   | 46.49      | 114    | 59       | 3   | 43          | 378        | 8             | 116          | 3.00E-29 | 107   |
| TcMYB1 | AtMYB51   | 45.87      | 109    | 58       | 1   | 43          | 366        | 15            | 123          | 4.00E-29 | 108   |
| TcMYB1 | AtMYB50   | 41.61      | 149    | 85       | 4   | 43          | 483        | 14            | 153          | 5.00E-29 | 107   |
| TcMYB1 | AtMYB83   | 48.31      | 118    | 60       | 2   | 43          | 393        | 32            | 147          | 5.00E-29 | 108   |
| TcMYB1 | ATMYB26   | 48.25      | 114    | 49       | 2   | 43          | 354        | 14            | 127          | 6.00E-29 | 108   |
| TcMYB1 | ATMYB65   | 50.98      | 102    | 49       | 1   | 43          | 345        | 43            | 144          | 6.00E-29 | 110   |
| TcMYB1 | ATMYB120  | 29.48      | 268    | 182      | 7   | 43          | 825        | 28            | 283          | 7.00E-29 | 110   |
| TcMYB1 | ATMYB3    | 32.18      | 202    | 136      | 5   | 25          | 627        | 16            | 199          | 7.00E-29 | 105   |
| TcMYB1 | AtMYB53   | 49.51      | 103    | 50       | 2   | 43          | 345        | 14            | 115          | 8.00E-29 | 107   |
| TcMYB1 | AtMYB112  | 35.12      | 168    | 106      | 2   | 7           | 501        | 22            | 189          | 1.00E-28 | 105   |
| TcMYB1 | AtMYB60   | 43.36      | 113    | 59       | 2   | 43          | 366        | 14            | 122          | 1.00E-28 | 105   |
| TcMYB1 | ATMYB3    | 44.35      | 115    | 63       | 1   | 43          | 384        | 14            | 128          | 1.00E-28 | 105   |
| TcMYB1 | ATMYB33   | 50.98      | 102    | 49       | 1   | 43          | 345        | 34            | 135          | 2.00E-28 | 108   |
| TcMYB1 | AtMYB9    | 49.02      | 102    | 51       | 1   | 43          | 345        | 14            | 115          | 2.00E-28 | 106   |
| TcMYB1 | AtMYB6    | 35.29      | 170    | 100      | 4   | 43          | 522        | 14            | 183          | 2.00E-28 | 103   |
| TcMYB1 | ATMYB16   | 37.42      | 163    | 101      | 2   | 43          | 528        | 14            | 170          | 3.00E-28 | 105   |
| TcMYB1 | AtMYB49   | 38.73      | 142    | 86       | 1   | 43          | 465        | 14            | 155          | 3.00E-28 | 105   |
| TcMYB1 | ATMYB71   | 29.7       | 266    | 176      | 9   | 43          | 807        | 20            | 258          | 4.00E-28 | 104   |
| TcMYB1 | AtMYB116  | 44.35      | 115    | 63       | 2   | 31          | 372        | 16            | 126          | 5.00E-28 | 104   |
| TcMYB1 | MYB8      | 44.95      | 109    | 59       | 1   | 43          | 366        | 14            | 122          | 5.00E-28 | 102   |
| TcMYB1 | ATMYB15   | 37.09      | 151    | 90       | 3   | 43          | 480        | 14            | 163          | 7.00E-28 | 103   |
| TcMYB1 | ATMYB30   | 38.36      | 146    | 88       | 3   | 43          | 474        | 14            | 150          | 7.00E-28 | 104   |
| TcMYB1 | AtMYB10   | 41.94      | 124    | 65       | 3   | 43          | 393        | 16            | 138          | 1.00E-27 | 102   |
| TcMYB1 | AtMYB10   | 25.61      | 82     | 61       | 1   | 43          | 288        | 69            | 149          | 7.00E-04 | 33.1  |
| TcMYB1 | ATMYB87   | 46.73      | 107    | 55       | 2   | 43          | 357        | 14            | 120          | 1.00E-27 | 103   |
| TcMYB1 | AtMYB103  | 42.28      | 123    | 70       | 1   | 43          | 408        | 14            | 136          | 1.00E-27 | 104   |
| TcMYB1 | ATMYB2    | 35.63      | 174    | 105      | 5   | 43          | 543        | 22            | 191          | 1.00E-27 | 102   |

|        |           |       |     |     |   |    |     |    |     |          |      |
|--------|-----------|-------|-----|-----|---|----|-----|----|-----|----------|------|
| TcMYB1 | ATMYB122  | 46.53 | 101 | 53  | 1 | 43 | 342 | 14 | 114 | 2.00E-27 | 103  |
| TcMYB1 | AtMYB40   | 33.73 | 166 | 108 | 4 | 43 | 534 | 14 | 169 | 2.00E-27 | 102  |
| TcMYB1 | AtMYB47   | 37.5  | 152 | 90  | 3 | 43 | 483 | 14 | 164 | 2.00E-27 | 102  |
| TcMYB1 | AtMYB32   | 40.26 | 154 | 90  | 4 | 43 | 498 | 14 | 159 | 2.00E-27 | 102  |
| TcMYB1 | ATMYB66   | 38.85 | 139 | 78  | 4 | 43 | 438 | 18 | 154 | 2.00E-27 | 100  |
| TcMYB1 | AtMYB100  | 40.71 | 113 | 65  | 1 | 52 | 384 | 29 | 141 | 2.00E-27 | 101  |
| TcMYB1 | AtMYB81   | 48.51 | 101 | 51  | 1 | 43 | 342 | 22 | 122 | 3.00E-27 | 104  |
| TcMYB1 | ATMYB55   | 46.96 | 115 | 47  | 2 | 43 | 345 | 14 | 127 | 3.00E-27 | 103  |
| TcMYB1 | AtMYB93   | 48.04 | 102 | 52  | 1 | 43 | 345 | 14 | 115 | 3.00E-27 | 103  |
| TcMYB1 | ATMYB68   | 48.54 | 103 | 51  | 2 | 43 | 345 | 14 | 116 | 4.00E-27 | 103  |
| TcMYB1 | ATMYB84   | 47.57 | 103 | 52  | 2 | 43 | 345 | 14 | 116 | 4.00E-27 | 102  |
| TcMYB1 | ATMYB38   | 31.53 | 222 | 126 | 5 | 43 | 630 | 14 | 233 | 4.00E-27 | 102  |
| TcMYB1 | AtMYB18   | 40.85 | 142 | 80  | 3 | 43 | 456 | 12 | 143 | 4.00E-27 | 101  |
| TcMYB1 | ATMYB96   | 41.8  | 122 | 66  | 2 | 43 | 393 | 14 | 131 | 5.00E-27 | 102  |
| TcMYB1 | AtMYB89   | 43.43 | 99  | 56  | 0 | 46 | 342 | 57 | 155 | 6.00E-27 | 99   |
| TcMYB1 | MYB7      | 35.48 | 155 | 99  | 2 | 43 | 504 | 14 | 167 | 7.00E-27 | 100  |
| TcMYB1 | ATMYB4    | 45.87 | 109 | 58  | 1 | 43 | 366 | 14 | 122 | 8.00E-27 | 100  |
| TcMYB1 | ATMYB123  | 45.05 | 111 | 59  | 2 | 19 | 345 | 8  | 117 | 1.00E-26 | 99.8 |
| TcMYB1 | ATMYB57   | 30.94 | 181 | 124 | 3 | 43 | 582 | 27 | 187 | 2.00E-26 | 98.2 |
| TcMYB1 | ATMYB31   | 36.69 | 139 | 66  | 3 | 43 | 393 | 14 | 148 | 2.00E-26 | 100  |
| TcMYB1 | AtMYB24   | 44.76 | 105 | 57  | 1 | 31 | 342 | 15 | 119 | 2.00E-26 | 98.2 |
| TcMYB1 | AtMYB42   | 38.81 | 134 | 80  | 2 | 43 | 438 | 14 | 146 | 2.00E-26 | 99.8 |
| TcMYB1 | ATMYB23   | 45.63 | 103 | 54  | 2 | 43 | 345 | 14 | 115 | 3.00E-26 | 97.8 |
| TcMYB1 | ATMYB111  | 36.59 | 164 | 102 | 3 | 43 | 528 | 14 | 172 | 4.00E-26 | 100  |
| TcMYB1 | ATMYB94   | 36.11 | 144 | 84  | 3 | 43 | 450 | 14 | 153 | 5.00E-26 | 99.8 |
| TcMYB1 | AtMYB62   | 44.64 | 112 | 60  | 3 | 43 | 372 | 21 | 127 | 6.00E-26 | 98.6 |
| TcMYB1 | ATMYB11   | 48.04 | 102 | 52  | 1 | 43 | 345 | 14 | 115 | 8.00E-26 | 99.4 |
| TcMYB1 | ATMYB0    | 36.49 | 148 | 89  | 3 | 43 | 471 | 16 | 158 | 1.00E-25 | 96.7 |
| TcMYB1 | AtMYB76   | 32.33 | 232 | 152 | 4 | 43 | 723 | 14 | 241 | 1.00E-25 | 99   |
| TcMYB1 | ATMYB29   | 30.97 | 226 | 147 | 5 | 43 | 693 | 14 | 220 | 1.00E-25 | 98.6 |
| TcMYB1 | ATMYB5    | 42.62 | 122 | 62  | 3 | 43 | 384 | 25 | 145 | 2.00E-25 | 96.7 |
| TcMYB1 | AtMYB108  | 35.48 | 155 | 93  | 4 | 43 | 486 | 21 | 174 | 2.00E-25 | 97.8 |
| TcMYB1 | AtMYB114  | 41.75 | 103 | 59  | 1 | 43 | 348 | 10 | 112 | 4.00E-25 | 92.4 |
| TcMYB1 | AtMYB20   | 44.66 | 103 | 55  | 2 | 43 | 345 | 14 | 115 | 7.00E-25 | 95.5 |
| TcMYB1 | AtMYB85   | 44.66 | 103 | 55  | 2 | 43 | 345 | 14 | 115 | 1.00E-24 | 94.4 |
| TcMYB1 | ATMYB12   | 29.9  | 194 | 135 | 2 | 43 | 621 | 14 | 205 | 3.00E-24 | 95.5 |
| TcMYB1 | AtMYB104  | 44.12 | 102 | 55  | 2 | 43 | 342 | 18 | 118 | 5.00E-24 | 94.7 |
| TcMYB1 | AtMYB113  | 33.99 | 153 | 94  | 4 | 43 | 480 | 10 | 152 | 9.00E-24 | 91.7 |
| TcMYB1 | AtMYB43   | 31.79 | 173 | 116 | 4 | 43 | 555 | 14 | 177 | 1.00E-23 | 92.8 |
| TcMYB1 | ATMYB90   | 40.95 | 105 | 61  | 1 | 43 | 354 | 10 | 114 | 1.00E-23 | 91.3 |
| TcMYB1 | ATMYB75   | 41.12 | 107 | 58  | 2 | 43 | 348 | 10 | 112 | 2.00E-23 | 90.9 |
| TcMYB1 | AtMYB22   | 34.88 | 129 | 82  | 2 | 4  | 384 | 41 | 168 | 3.00E-23 | 90.5 |
| TcMYB1 | AtMYB124  | 31.78 | 129 | 88  | 0 | 52 | 438 | 28 | 156 | 4.00E-22 | 89.7 |
| TcMYB1 | AtMYB124  | 19.88 | 171 | 129 | 5 | 43 | 531 | 77 | 237 | 2.00E-04 | 35   |
| TcMYB1 | ATMYB78   | 31.16 | 199 | 111 | 6 | 43 | 561 | 28 | 226 | 5.00E-22 | 88.2 |
| TcMYB1 | ATMYB88   | 37.86 | 103 | 64  | 0 | 52 | 360 | 33 | 135 | 5.00E-22 | 89.7 |
| TcMYB1 | ATMYB88   | 32.08 | 53  | 36  | 1 | 43 | 201 | 82 | 133 | 7.00E-04 | 33.5 |
| TcMYB1 | ATMYB99   | 39.52 | 124 | 63  | 4 | 43 | 378 | 15 | 134 | 2.00E-21 | 85.1 |
| TcMYB1 | ATMYB91   | 32.71 | 107 | 69  | 1 | 52 | 363 | 7  | 113 | 6.00E-16 | 70.9 |
| TcMYB2 | ATMYB13   | 55.38 | 130 | 58  | 0 | 31 | 420 | 7  | 136 | 4.00E-51 | 161  |
| TcMYB2 | ATMYB3    | 52.08 | 144 | 69  | 1 | 43 | 474 | 19 | 161 | 1.00E-50 | 159  |
| TcMYB2 | AtMYB79   | 60.91 | 110 | 43  | 0 | 40 | 369 | 4  | 113 | 4.00E-50 | 159  |
| TcMYB2 | ATMYB48   | 54.96 | 131 | 51  | 1 | 49 | 417 | 8  | 138 | 7.00E-50 | 159  |
| TcMYB2 | ATMYB59-3 | 54.81 | 135 | 61  | 1 | 37 | 441 | 5  | 135 | 7.00E-50 | 158  |
| TcMYB2 | ATMYB71   | 64.15 | 106 | 38  | 0 | 40 | 357 | 16 | 121 | 2.00E-49 | 158  |
| TcMYB2 | AtMYB108  | 39.18 | 245 | 141 | 6 | 34 | 744 | 15 | 249 | 1.00E-48 | 157  |
| TcMYB2 | MYB7      | 37.85 | 214 | 128 | 2 | 31 | 657 | 7  | 219 | 1.00E-48 | 155  |
| TcMYB2 | ATMYB63   | 55.47 | 128 | 57  | 0 | 31 | 414 | 9  | 136 | 2.00E-48 | 156  |
| TcMYB2 | ATMYB67   | 45.96 | 161 | 74  | 3 | 1  | 444 | 1  | 161 | 3.00E-48 | 156  |
| TcMYB2 | ATMYB14   | 38.4  | 237 | 108 | 5 | 31 | 627 | 7  | 243 | 3.00E-48 | 154  |
| TcMYB2 | AtMYB24   | 62.5  | 104 | 39  | 0 | 43 | 354 | 16 | 119 | 3.00E-48 | 153  |
| TcMYB2 | AtMYB85   | 37.84 | 222 | 136 | 5 | 31 | 690 | 7  | 219 | 4.00E-48 | 154  |
| TcMYB2 | ATMYB61   | 63.64 | 110 | 40  | 0 | 31 | 360 | 7  | 116 | 4.00E-48 | 157  |
| TcMYB2 | ATMYB86   | 47.5  | 160 | 82  | 1 | 31 | 504 | 7  | 166 | 4.00E-48 | 157  |
| TcMYB2 | ATMYB57   | 54.69 | 128 | 55  | 1 | 46 | 420 | 25 | 152 | 5.00E-48 | 152  |
| TcMYB2 | AtMYB41   | 60.91 | 110 | 43  | 0 | 31 | 360 | 7  | 116 | 6.00E-48 | 154  |
| TcMYB2 | ATMYB3    | 40.74 | 189 | 110 | 2 | 31 | 591 | 7  | 194 | 6.00E-48 | 154  |
| TcMYB2 | AtMYB42   | 52.21 | 136 | 65  | 0 | 31 | 438 | 7  | 142 | 9.00E-48 | 154  |
| TcMYB2 | AtMYB32   | 50.71 | 140 | 68  | 1 | 31 | 447 | 7  | 146 | 9.00E-48 | 154  |
| TcMYB2 | ATMYB46   | 55.22 | 134 | 60  | 1 | 40 | 441 | 16 | 147 | 1.00E-47 | 154  |
| TcMYB2 | AtMYB112  | 59.62 | 104 | 42  | 0 | 43 | 354 | 31 | 134 | 1.00E-47 | 152  |
| TcMYB2 | ATMYB4    | 47.83 | 161 | 77  | 2 | 31 | 492 | 7  | 167 | 1.00E-47 | 154  |
| TcMYB2 | AtMYB107  | 61.82 | 110 | 42  | 0 | 31 | 360 | 7  | 116 | 2.00E-47 | 154  |
| TcMYB2 | AtMYB50   | 41.54 | 195 | 92  | 3 | 31 | 549 | 7  | 201 | 2.00E-47 | 154  |
| TcMYB2 | ATMYB15   | 38.33 | 227 | 133 | 4 | 31 | 690 | 7  | 228 | 3.00E-47 | 152  |
| TcMYB2 | MYB8      | 59.09 | 110 | 45  | 0 | 31 | 360 | 7  | 116 | 4.00E-47 | 150  |
| TcMYB2 | AtMYB53   | 62.39 | 109 | 41  | 0 | 34 | 360 | 8  | 116 | 5.00E-47 | 153  |
| TcMYB2 | AtMYB9    | 60.91 | 110 | 43  | 0 | 31 | 360 | 7  | 116 | 6.00E-47 | 153  |
| TcMYB2 | ATMYB123  | 52.21 | 136 | 65  | 0 | 37 | 444 | 11 | 146 | 7.00E-47 | 151  |
| TcMYB2 | AtMYB20   | 60    | 110 | 44  | 0 | 31 | 360 | 7  | 116 | 9.00E-47 | 151  |

|        |          |       |     |     |   |     |     |     |     |          |      |
|--------|----------|-------|-----|-----|---|-----|-----|-----|-----|----------|------|
| TcMYB2 | ATMYB72  | 42.08 | 183 | 106 | 2 | 31  | 579 | 9   | 181 | 9.00E-47 | 152  |
| TcMYB2 | AtMYB74  | 35.86 | 290 | 153 | 8 | 31  | 801 | 7   | 286 | 9.00E-47 | 152  |
| TcMYB2 | AtMYB62  | 55.75 | 113 | 50  | 0 | 19  | 357 | 10  | 122 | 1.00E-46 | 151  |
| TcMYB2 | AtMYB10  | 49.3  | 142 | 72  | 0 | 31  | 456 | 9   | 150 | 2.00E-46 | 149  |
| TcMYB2 | ATMYB92  | 59.63 | 109 | 44  | 0 | 34  | 360 | 8   | 116 | 2.00E-46 | 152  |
| TcMYB2 | AtMYB103 | 45.09 | 173 | 79  | 4 | 31  | 501 | 7   | 179 | 2.00E-46 | 153  |
| TcMYB2 | ATMYB2   | 62.5  | 104 | 39  | 0 | 46  | 357 | 20  | 123 | 2.00E-46 | 150  |
| TcMYB2 | AtMYB83  | 45.66 | 173 | 89  | 2 | 34  | 537 | 26  | 195 | 2.00E-46 | 152  |
| TcMYB2 | ATMYB58  | 57.27 | 110 | 47  | 0 | 31  | 360 | 9   | 118 | 2.00E-46 | 150  |
| TcMYB2 | AtMYB43  | 60.91 | 110 | 43  | 0 | 31  | 360 | 7   | 116 | 3.00E-46 | 151  |
| TcMYB2 | ATMYB5   | 61.82 | 110 | 42  | 0 | 31  | 360 | 18  | 127 | 3.00E-46 | 149  |
| TcMYB2 | ATMYB102 | 60.91 | 110 | 43  | 0 | 31  | 360 | 7   | 116 | 3.00E-46 | 152  |
| TcMYB2 | ATMYB121 | 38.73 | 204 | 125 | 1 | 49  | 660 | 28  | 228 | 4.00E-46 | 149  |
| TcMYB2 | ATMYB106 | 61.82 | 110 | 42  | 0 | 31  | 360 | 50  | 159 | 5.00E-46 | 152  |
| TcMYB2 | AtMYB116 | 60.19 | 103 | 41  | 0 | 49  | 357 | 19  | 121 | 7.00E-46 | 149  |
| TcMYB2 | AtMYB17  | 60    | 110 | 44  | 0 | 31  | 360 | 7   | 116 | 1.00E-45 | 149  |
| TcMYB2 | AtMYB27  | 58.93 | 112 | 46  | 0 | 40  | 375 | 7   | 118 | 2.00E-45 | 147  |
| TcMYB2 | ATMYB16  | 51.45 | 138 | 67  | 0 | 31  | 444 | 7   | 144 | 2.00E-45 | 149  |
| TcMYB2 | AtMYB6   | 56.36 | 110 | 48  | 0 | 31  | 360 | 7   | 116 | 2.00E-45 | 146  |
| TcMYB2 | ATMYB30  | 44.63 | 177 | 94  | 3 | 31  | 549 | 7   | 176 | 4.00E-45 | 148  |
| TcMYB2 | ATMYB12  | 53.73 | 134 | 57  | 2 | 31  | 417 | 7   | 139 | 5.00E-45 | 149  |
| TcMYB2 | ATMYB23  | 46.04 | 139 | 75  | 0 | 49  | 465 | 13  | 151 | 2.00E-44 | 143  |
| TcMYB2 | AtMYB49  | 56.88 | 109 | 47  | 0 | 34  | 360 | 8   | 116 | 4.00E-44 | 145  |
| TcMYB2 | ATMYB101 | 52.89 | 121 | 53  | 1 | 46  | 396 | 18  | 138 | 5.00E-44 | 149  |
| TcMYB2 | ATMYB35  | 54.55 | 110 | 50  | 0 | 31  | 360 | 7   | 116 | 5.00E-44 | 145  |
| TcMYB2 | ATMYB26  | 48.91 | 137 | 61  | 1 | 31  | 414 | 7   | 143 | 5.00E-44 | 146  |
| TcMYB2 | AtMYB93  | 59.09 | 110 | 45  | 0 | 31  | 360 | 7   | 116 | 7.00E-44 | 146  |
| TcMYB2 | ATMYB99  | 54.7  | 117 | 46  | 1 | 31  | 360 | 8   | 124 | 1.00E-43 | 142  |
| TcMYB2 | AtMYB40  | 42.26 | 168 | 88  | 2 | 31  | 507 | 7   | 174 | 1.00E-43 | 142  |
| TcMYB2 | ATMYB66  | 56.73 | 104 | 45  | 0 | 49  | 360 | 17  | 120 | 2.00E-43 | 140  |
| TcMYB2 | ATMYB94  | 48.59 | 142 | 71  | 3 | 31  | 450 | 7   | 146 | 2.00E-43 | 144  |
| TcMYB2 | AtMYB51  | 61.9  | 105 | 40  | 0 | 46  | 360 | 13  | 117 | 2.00E-43 | 144  |
| TcMYB2 | AtMYB60  | 48.57 | 140 | 69  | 1 | 31  | 441 | 7   | 146 | 2.00E-43 | 142  |
| TcMYB2 | ATMYB65  | 47.86 | 140 | 66  | 1 | 37  | 435 | 38  | 177 | 4.00E-43 | 147  |
| TcMYB2 | ATMYB34  | 55.45 | 110 | 49  | 0 | 31  | 360 | 7   | 116 | 4.00E-43 | 142  |
| TcMYB2 | ATMYB87  | 36.15 | 260 | 165 | 9 | 31  | 807 | 7   | 233 | 6.00E-43 | 142  |
| TcMYB2 | ATMYB80  | 52.21 | 113 | 54  | 0 | 22  | 360 | 4   | 116 | 6.00E-43 | 142  |
| TcMYB2 | ATMYB78  | 55.56 | 117 | 38  | 1 | 46  | 354 | 26  | 142 | 6.00E-43 | 142  |
| TcMYB2 | ATMYB122 | 43.27 | 171 | 97  | 2 | 31  | 543 | 7   | 168 | 1.00E-42 | 142  |
| TcMYB2 | AtMYB81  | 36.94 | 222 | 131 | 6 | 37  | 675 | 17  | 238 | 1.00E-42 | 144  |
| TcMYB2 | ATMYB95  | 49.28 | 138 | 69  | 1 | 34  | 444 | 8   | 145 | 1.00E-42 | 140  |
| TcMYB2 | ATMYB11  | 56.36 | 110 | 48  | 0 | 31  | 360 | 7   | 116 | 2.00E-42 | 142  |
| TcMYB2 | ATMYB111 | 56.36 | 110 | 48  | 0 | 31  | 360 | 7   | 116 | 2.00E-42 | 141  |
| TcMYB2 | ATMYB31  | 42.04 | 157 | 91  | 2 | 31  | 501 | 7   | 153 | 3.00E-42 | 141  |
| TcMYB2 | ATMYB55  | 54.92 | 122 | 43  | 1 | 31  | 360 | 7   | 128 | 3.00E-42 | 141  |
| TcMYB2 | AtMYB36  | 47.37 | 133 | 69  | 1 | 31  | 426 | 7   | 139 | 3.00E-42 | 141  |
| TcMYB2 | ATMYB96  | 40.34 | 176 | 98  | 1 | 31  | 537 | 7   | 182 | 6.00E-42 | 140  |
| TcMYB2 | AtMYB82  | 47.69 | 130 | 64  | 2 | 31  | 408 | 3   | 131 | 2.00E-41 | 135  |
| TcMYB2 | AtMYB76  | 55.45 | 110 | 49  | 0 | 31  | 360 | 7   | 116 | 2.00E-41 | 139  |
| TcMYB2 | ATMYB0   | 51.38 | 109 | 53  | 0 | 34  | 360 | 10  | 118 | 3.00E-41 | 135  |
| TcMYB2 | ATMYB28  | 55.45 | 110 | 49  | 0 | 31  | 360 | 7   | 116 | 3.00E-41 | 139  |
| TcMYB2 | ATMYB84  | 44.76 | 143 | 78  | 1 | 31  | 456 | 7   | 149 | 4.00E-41 | 137  |
| TcMYB2 | AtMYB97  | 51.67 | 120 | 52  | 2 | 46  | 387 | 19  | 138 | 5.00E-41 | 139  |
| TcMYB2 | ATMYB29  | 55.45 | 110 | 49  | 0 | 31  | 360 | 7   | 116 | 9.00E-41 | 137  |
| TcMYB2 | AtMYB47  | 45.39 | 152 | 77  | 2 | 34  | 471 | 8   | 159 | 1.00E-40 | 135  |
| TcMYB2 | ATMYB38  | 44.74 | 152 | 78  | 3 | 31  | 468 | 7   | 154 | 3.00E-40 | 135  |
| TcMYB2 | ATMYB33  | 43.92 | 148 | 76  | 1 | 34  | 456 | 28  | 175 | 3.00E-40 | 139  |
| TcMYB2 | ATMYB68  | 50    | 122 | 60  | 1 | 31  | 393 | 7   | 128 | 4.00E-40 | 136  |
| TcMYB2 | ATMYB37  | 48.78 | 123 | 62  | 1 | 31  | 396 | 7   | 129 | 6.00E-40 | 135  |
| TcMYB2 | ATMYB120 | 56.19 | 105 | 46  | 0 | 46  | 360 | 26  | 130 | 7.00E-40 | 138  |
| TcMYB2 | AtMYB19  | 46.9  | 145 | 71  | 1 | 37  | 453 | 9   | 153 | 1.00E-39 | 132  |
| TcMYB2 | AtMYB18  | 49.25 | 134 | 66  | 1 | 40  | 435 | 8   | 141 | 3.00E-39 | 132  |
| TcMYB2 | AtMYB113 | 41.89 | 148 | 86  | 1 | 46  | 489 | 8   | 149 | 1.00E-38 | 129  |
| TcMYB2 | AtMYB114 | 50.47 | 107 | 53  | 0 | 46  | 366 | 8   | 114 | 4.00E-38 | 124  |
| TcMYB2 | AtMYB45  | 45.71 | 140 | 74  | 1 | 19  | 432 | 9   | 148 | 5.00E-38 | 128  |
| TcMYB2 | ATMYB75  | 50.47 | 107 | 53  | 0 | 46  | 366 | 8   | 114 | 3.00E-37 | 125  |
| TcMYB2 | ATMYB90  | 50.96 | 104 | 51  | 0 | 46  | 357 | 8   | 111 | 5.00E-36 | 122  |
| TcMYB2 | ATMYB25  | 37.21 | 172 | 107 | 4 | 52  | 564 | 50  | 215 | 5.00E-31 | 112  |
| TcMYB2 | ATMYB77  | 34.73 | 167 | 100 | 2 | 52  | 525 | 6   | 171 | 1.00E-29 | 107  |
| TcMYB2 | AtMYB109 | 50.49 | 103 | 50  | 2 | 52  | 357 | 56  | 156 | 1.00E-29 | 108  |
| TcMYB2 | AtMYB109 | 29.69 | 64  | 44  | 1 | 211 | 399 | 56  | 119 | 6.00E-05 | 36.2 |
| TcMYB2 | ATMYB119 | 45.79 | 107 | 57  | 2 | 40  | 357 | 101 | 205 | 1.00E-29 | 108  |
| TcMYB2 | ATMYB119 | 31.34 | 67  | 45  | 1 | 202 | 399 | 102 | 168 | 2.00E-07 | 44.3 |
| TcMYB2 | ATMYB73  | 47.06 | 102 | 54  | 1 | 52  | 357 | 13  | 113 | 3.00E-29 | 106  |
| TcMYB2 | ATMYB73  | 28.12 | 64  | 45  | 1 | 211 | 399 | 13  | 76  | 6.00E-05 | 36.2 |
| TcMYB2 | AtMYB98  | 42.37 | 118 | 68  | 2 | 4   | 357 | 204 | 317 | 1.00E-28 | 106  |
| TcMYB2 | AtMYB98  | 29.73 | 74  | 51  | 1 | 181 | 399 | 207 | 280 | 2.00E-08 | 47.4 |
| TcMYB2 | AtMYB70  | 48.04 | 102 | 53  | 1 | 52  | 357 | 13  | 113 | 1.00E-28 | 104  |
| TcMYB2 | ATMYB118 | 44.64 | 112 | 61  | 2 | 25  | 357 | 180 | 289 | 1.00E-28 | 106  |
| TcMYB2 | ATMYB118 | 26.56 | 64  | 46  | 1 | 211 | 399 | 189 | 252 | 5.00E-06 | 39.7 |

|        |          |       |     |     |   |     |     |     |     |          |      |
|--------|----------|-------|-----|-----|---|-----|-----|-----|-----|----------|------|
| TcMYB2 | AtMYB64  | 38.76 | 129 | 78  | 2 | 52  | 435 | 105 | 231 | 1.00E-28 | 106  |
| TcMYB2 | AtMYB1   | 51.96 | 102 | 49  | 1 | 52  | 357 | 55  | 155 | 2.00E-28 | 105  |
| TcMYB2 | AtMYB1   | 30.16 | 63  | 43  | 1 | 196 | 381 | 50  | 112 | 8.00E-05 | 35.8 |
| TcMYB2 | ATMYB44  | 35.85 | 159 | 96  | 4 | 52  | 510 | 6   | 158 | 5.00E-28 | 102  |
| TcMYB2 | AtMYB104 | 46.3  | 108 | 58  | 1 | 37  | 360 | 13  | 119 | 8.00E-28 | 103  |
| TcMYB2 | ATMYB52  | 38.55 | 166 | 79  | 5 | 52  | 480 | 5   | 168 | 9.00E-27 | 98.2 |
| TcMYB2 | ATMYB54  | 42.86 | 126 | 71  | 3 | 52  | 426 | 6   | 127 | 2.00E-26 | 97.4 |
| TcMYB2 | AtMYB117 | 44.9  | 98  | 53  | 2 | 46  | 336 | 96  | 191 | 4.00E-26 | 98.6 |
| TcMYB2 | AtMYB117 | 28.57 | 63  | 44  | 1 | 205 | 390 | 96  | 158 | 2.00E-04 | 34.7 |
| TcMYB2 | ATMYB105 | 33.95 | 162 | 89  | 6 | 37  | 468 | 102 | 259 | 1.00E-25 | 96.7 |
| TcMYB2 | AtMYB56  | 37.14 | 140 | 79  | 3 | 16  | 408 | 86  | 219 | 2.00E-25 | 96.3 |
| TcMYB2 | ATMYB110 | 37.14 | 140 | 87  | 4 | 52  | 468 | 67  | 197 | 2.00E-25 | 95.9 |
| TcMYB2 | AtMYB115 | 37.74 | 106 | 66  | 1 | 37  | 354 | 153 | 257 | 1.00E-24 | 94.7 |
| TcMYB2 | AtMYB115 | 23.44 | 64  | 48  | 1 | 211 | 399 | 158 | 221 | 6.00E-05 | 36.2 |
| TcMYB2 | AtMYB89  | 33.59 | 131 | 85  | 2 | 37  | 423 | 51  | 180 | 5.00E-23 | 86.7 |
| TcMYB2 | AtMYB124 | 38.66 | 119 | 73  | 2 | 61  | 417 | 28  | 138 | 2.00E-22 | 89   |
| TcMYB2 | AtMYB100 | 36.04 | 111 | 71  | 2 | 22  | 354 | 19  | 125 | 4.00E-22 | 85.5 |
| TcMYB2 | AtMYB100 | 25.58 | 43  | 32  | 0 | 271 | 399 | 47  | 89  | 3.00E-04 | 33.9 |
| TcMYB2 | ATMYB69  | 37.21 | 129 | 74  | 2 | 49  | 414 | 18  | 145 | 6.00E-22 | 85.1 |
| TcMYB2 | ATMYB91  | 28.96 | 183 | 113 | 4 | 61  | 558 | 7   | 188 | 1.00E-21 | 85.9 |
| TcMYB2 | ATMYB88  | 34.45 | 119 | 78  | 1 | 61  | 417 | 33  | 150 | 5.00E-20 | 82   |
| TcMYB2 | AtMYB22  | 33.33 | 111 | 73  | 3 | 25  | 354 | 45  | 152 | 2.00E-19 | 78.2 |
| TcMYB2 | AtMYB22  | 19.12 | 68  | 55  | 0 | 196 | 399 | 49  | 116 | 6.00E-04 | 32.7 |
| TcMYB3 | AtMYB20  | 69.11 | 123 | 35  | 1 | 4   | 363 | 32  | 154 | 3.00E-60 | 183  |
| TcMYB3 | AtMYB43  | 52    | 175 | 75  | 2 | 4   | 501 | 32  | 200 | 2.00E-59 | 182  |
| TcMYB3 | AtMYB42  | 68.91 | 119 | 35  | 1 | 4   | 354 | 32  | 150 | 3.00E-58 | 178  |
| TcMYB3 | ATMYB86  | 44.16 | 231 | 101 | 5 | 4   | 612 | 32  | 243 | 4.00E-58 | 180  |
| TcMYB3 | AtMYB85  | 48.45 | 194 | 81  | 4 | 4   | 528 | 32  | 223 | 2.00E-57 | 176  |
| TcMYB3 | ATMYB61  | 58.45 | 142 | 59  | 1 | 4   | 429 | 32  | 165 | 4.00E-55 | 172  |
| TcMYB3 | ATMYB99  | 50    | 190 | 89  | 5 | 7   | 558 | 41  | 206 | 7.00E-55 | 168  |
| TcMYB3 | AtMYB50  | 74.75 | 99  | 25  | 0 | 4   | 300 | 32  | 130 | 9.00E-55 | 170  |
| TcMYB3 | AtMYB9   | 53.75 | 160 | 64  | 3 | 4   | 453 | 32  | 190 | 6.00E-54 | 169  |
| TcMYB3 | AtMYB53  | 50    | 178 | 71  | 3 | 4   | 483 | 32  | 209 | 1.00E-53 | 167  |
| TcMYB3 | MYB7     | 63.79 | 116 | 42  | 0 | 4   | 351 | 32  | 147 | 5.00E-53 | 164  |
| TcMYB3 | AtMYB17  | 73.47 | 98  | 26  | 0 | 4   | 297 | 32  | 129 | 5.00E-53 | 165  |
| TcMYB3 | AtMYB107 | 54.49 | 156 | 61  | 3 | 4   | 441 | 32  | 186 | 6.00E-53 | 166  |
| TcMYB3 | ATMYB4   | 71.43 | 98  | 28  | 0 | 4   | 297 | 32  | 129 | 5.00E-52 | 162  |
| TcMYB3 | ATMYB92  | 72.16 | 97  | 27  | 0 | 4   | 294 | 32  | 128 | 1.00E-51 | 162  |
| TcMYB3 | AtMYB93  | 47.57 | 185 | 80  | 4 | 4   | 507 | 32  | 213 | 2.00E-51 | 163  |
| TcMYB3 | ATMYB16  | 66.67 | 114 | 38  | 0 | 4   | 345 | 32  | 145 | 2.00E-51 | 162  |
| TcMYB3 | AtMYB6   | 70.41 | 98  | 29  | 0 | 4   | 297 | 32  | 129 | 3.00E-51 | 159  |
| TcMYB3 | ATMYB80  | 71.72 | 99  | 28  | 0 | 4   | 300 | 32  | 130 | 4.00E-51 | 161  |
| TcMYB3 | ATMYB55  | 52.9  | 155 | 61  | 2 | 4   | 432 | 32  | 184 | 5.00E-51 | 161  |
| TcMYB3 | AtMYB74  | 72.45 | 98  | 27  | 0 | 1   | 294 | 32  | 129 | 1.00E-50 | 160  |
| TcMYB3 | AtMYB76  | 53.21 | 156 | 67  | 3 | 4   | 453 | 32  | 179 | 2.00E-50 | 160  |
| TcMYB3 | AtMYB32  | 62.07 | 116 | 44  | 1 | 4   | 351 | 32  | 146 | 2.00E-50 | 158  |
| TcMYB3 | AtMYB40  | 67.96 | 103 | 32  | 1 | 4   | 309 | 32  | 134 | 2.00E-50 | 157  |
| TcMYB3 | ATMYB102 | 73.2  | 97  | 26  | 0 | 4   | 294 | 32  | 128 | 3.00E-50 | 159  |
| TcMYB3 | ATMYB28  | 48.78 | 164 | 84  | 1 | 4   | 495 | 32  | 194 | 1.00E-49 | 158  |
| TcMYB3 | ATMYB3   | 69.39 | 98  | 30  | 0 | 4   | 297 | 32  | 129 | 1.00E-49 | 155  |
| TcMYB3 | ATMYB106 | 72.92 | 96  | 26  | 0 | 4   | 291 | 75  | 170 | 2.00E-49 | 158  |
| TcMYB3 | AtMYB49  | 74.23 | 97  | 25  | 0 | 4   | 294 | 32  | 128 | 2.00E-49 | 156  |
| TcMYB3 | ATMYB35  | 69    | 100 | 31  | 0 | 1   | 300 | 31  | 130 | 3.00E-49 | 156  |
| TcMYB3 | MYB8     | 68.37 | 98  | 31  | 0 | 4   | 297 | 32  | 129 | 6.00E-49 | 152  |
| TcMYB3 | ATMYB67  | 47.65 | 170 | 88  | 2 | 4   | 510 | 42  | 210 | 7.00E-49 | 155  |
| TcMYB3 | AtMYB41  | 71.13 | 97  | 28  | 0 | 4   | 294 | 32  | 128 | 1.00E-48 | 154  |
| TcMYB3 | ATMYB5   | 65.69 | 102 | 35  | 0 | 7   | 312 | 44  | 145 | 3.00E-48 | 151  |
| TcMYB3 | AtMYB51  | 71.43 | 98  | 28  | 0 | 4   | 297 | 33  | 130 | 2.00E-47 | 152  |
| TcMYB3 | ATMYB29  | 68.69 | 99  | 31  | 0 | 4   | 300 | 32  | 130 | 4.00E-47 | 151  |
| TcMYB3 | ATMYB34  | 65.69 | 102 | 35  | 0 | 1   | 306 | 31  | 132 | 4.00E-47 | 150  |
| TcMYB3 | AtMYB103 | 65.35 | 101 | 35  | 0 | 4   | 306 | 32  | 132 | 1.00E-45 | 148  |
| TcMYB3 | ATMYB122 | 66.33 | 98  | 33  | 0 | 4   | 297 | 32  | 129 | 5.00E-44 | 143  |
| TcMYB3 | ATMYB95  | 46.9  | 145 | 77  | 1 | 4   | 438 | 32  | 161 | 2.00E-43 | 140  |
| TcMYB3 | ATMYB13  | 40.8  | 201 | 102 | 3 | 1   | 552 | 31  | 218 | 2.00E-43 | 139  |
| TcMYB3 | ATMYB46  | 70.45 | 88  | 26  | 0 | 4   | 267 | 38  | 125 | 2.00E-43 | 140  |
| TcMYB3 | ATMYB15  | 47.83 | 161 | 83  | 3 | 4   | 483 | 32  | 176 | 6.00E-42 | 136  |
| TcMYB3 | ATMYB14  | 68.6  | 86  | 27  | 0 | 1   | 258 | 31  | 116 | 7.00E-42 | 135  |
| TcMYB3 | AtMYB47  | 44.9  | 147 | 81  | 2 | 4   | 444 | 32  | 163 | 1.00E-41 | 135  |
| TcMYB3 | ATMYB72  | 70.59 | 85  | 25  | 0 | 4   | 258 | 34  | 118 | 1.00E-41 | 136  |
| TcMYB3 | AtMYB83  | 67.44 | 86  | 28  | 0 | 4   | 261 | 50  | 135 | 3.00E-41 | 136  |
| TcMYB3 | AtMYB19  | 43.82 | 178 | 89  | 5 | 7   | 507 | 33  | 202 | 3.00E-41 | 134  |
| TcMYB3 | AtMYB10  | 65.56 | 90  | 31  | 0 | 4   | 273 | 34  | 123 | 8.00E-41 | 132  |
| TcMYB3 | ATMYB101 | 68.6  | 86  | 27  | 0 | 4   | 261 | 38  | 123 | 9.00E-41 | 137  |
| TcMYB3 | ATMYB30  | 55.86 | 111 | 49  | 1 | 4   | 336 | 32  | 140 | 1.00E-40 | 134  |
| TcMYB3 | AtMYB116 | 52.99 | 117 | 55  | 1 | 4   | 354 | 38  | 153 | 1.00E-40 | 133  |
| TcMYB3 | ATMYB63  | 68.6  | 86  | 27  | 0 | 7   | 264 | 35  | 120 | 3.00E-40 | 132  |
| TcMYB3 | ATMYB111 | 37.93 | 203 | 116 | 3 | 4   | 582 | 32  | 211 | 3.00E-40 | 133  |
| TcMYB3 | ATMYB58  | 68.24 | 85  | 27  | 0 | 4   | 258 | 34  | 118 | 4.00E-40 | 131  |
| TcMYB3 | AtMYB82  | 47.37 | 133 | 61  | 2 | 4   | 375 | 32  | 161 | 5.00E-40 | 129  |
| TcMYB3 | ATMYB26  | 64.89 | 94  | 24  | 1 | 4   | 258 | 32  | 125 | 1.00E-39 | 132  |

|        |           |       |     |     |   |     |     |     |     |          |      |
|--------|-----------|-------|-----|-----|---|-----|-----|-----|-----|----------|------|
| TcMYB3 | AtMYB79   | 67.82 | 87  | 28  | 0 | 1   | 261 | 25  | 111 | 1.00E-39 | 130  |
| TcMYB3 | AtMYB62   | 45.83 | 144 | 78  | 2 | 4   | 435 | 39  | 171 | 1.00E-39 | 130  |
| TcMYB3 | ATMYB33   | 67.44 | 86  | 28  | 0 | 4   | 261 | 52  | 137 | 2.00E-39 | 134  |
| TcMYB3 | AtMYB18   | 43.51 | 154 | 83  | 4 | 4   | 453 | 30  | 180 | 2.00E-39 | 130  |
| TcMYB3 | ATMYB94   | 65.91 | 88  | 30  | 0 | 4   | 267 | 32  | 119 | 2.00E-39 | 131  |
| TcMYB3 | ATMYB57   | 57.29 | 96  | 41  | 0 | 4   | 291 | 45  | 140 | 2.00E-39 | 127  |
| TcMYB3 | ATMYB3    | 43.84 | 146 | 82  | 2 | 4   | 441 | 40  | 181 | 2.00E-39 | 128  |
| TcMYB3 | ATMYB31   | 67.05 | 88  | 29  | 0 | 4   | 267 | 32  | 119 | 3.00E-39 | 130  |
| TcMYB3 | ATMYB120  | 67.82 | 87  | 28  | 0 | 4   | 264 | 46  | 132 | 3.00E-39 | 134  |
| TcMYB3 | ATMYB71   | 66.67 | 87  | 29  | 0 | 1   | 261 | 37  | 123 | 4.00E-39 | 129  |
| TcMYB3 | ATMYB12   | 65.88 | 85  | 29  | 0 | 4   | 258 | 32  | 116 | 6.00E-39 | 130  |
| TcMYB3 | ATMYB123  | 65.88 | 85  | 29  | 0 | 4   | 258 | 34  | 118 | 8.00E-39 | 127  |
| TcMYB3 | AtMYB81   | 62.22 | 90  | 34  | 1 | 4   | 273 | 40  | 128 | 1.00E-38 | 130  |
| TcMYB3 | ATMYB96   | 64.77 | 88  | 31  | 0 | 4   | 267 | 32  | 119 | 2.00E-38 | 129  |
| TcMYB3 | AtMYB108  | 40.8  | 174 | 90  | 3 | 4   | 486 | 39  | 206 | 2.00E-38 | 128  |
| TcMYB3 | ATMYB66   | 63.53 | 85  | 31  | 0 | 4   | 258 | 36  | 120 | 3.00E-38 | 124  |
| TcMYB3 | AtMYB60   | 52.1  | 119 | 57  | 1 | 4   | 360 | 32  | 146 | 4.00E-38 | 126  |
| TcMYB3 | ATMYB11   | 63.53 | 85  | 31  | 0 | 4   | 258 | 32  | 116 | 1.00E-37 | 127  |
| TcMYB3 | AtMYB97   | 63.22 | 87  | 32  | 0 | 4   | 264 | 39  | 125 | 2.00E-37 | 127  |
| TcMYB3 | AtMYB36   | 44.9  | 147 | 73  | 2 | 13  | 429 | 36  | 177 | 2.00E-37 | 125  |
| TcMYB3 | ATMYB65   | 62.79 | 86  | 32  | 0 | 4   | 261 | 61  | 146 | 3.00E-37 | 129  |
| TcMYB3 | AtMYB45   | 38.69 | 168 | 98  | 3 | 4   | 492 | 38  | 189 | 4.00E-37 | 123  |
| TcMYB3 | ATMYB23   | 61.18 | 85  | 33  | 0 | 4   | 258 | 32  | 116 | 5.00E-37 | 122  |
| TcMYB3 | ATMYB84   | 68.29 | 82  | 26  | 0 | 13  | 258 | 36  | 117 | 8.00E-37 | 124  |
| TcMYB3 | AtMYB112  | 57.61 | 92  | 39  | 0 | 1   | 276 | 51  | 142 | 9.00E-37 | 122  |
| TcMYB3 | ATMYB37   | 38.05 | 205 | 98  | 4 | 13  | 540 | 36  | 233 | 1.00E-36 | 124  |
| TcMYB3 | AtMYB24   | 59.55 | 89  | 36  | 0 | 4   | 270 | 37  | 125 | 1.00E-36 | 120  |
| TcMYB3 | ATMYB121  | 37.75 | 204 | 108 | 6 | 4   | 558 | 47  | 240 | 1.00E-36 | 122  |
| TcMYB3 | ATMYB68   | 67.07 | 82  | 27  | 0 | 13  | 258 | 36  | 117 | 3.00E-36 | 123  |
| TcMYB3 | ATMYB0    | 60    | 85  | 34  | 0 | 4   | 258 | 34  | 118 | 5.00E-36 | 119  |
| TcMYB3 | AtMYB114  | 50.94 | 106 | 52  | 1 | 4   | 321 | 28  | 123 | 1.00E-35 | 116  |
| TcMYB3 | ATMYB38   | 53.64 | 110 | 50  | 1 | 13  | 339 | 36  | 145 | 1.00E-35 | 120  |
| TcMYB3 | ATMYB2    | 36.51 | 189 | 111 | 3 | 1   | 540 | 39  | 226 | 1.00E-35 | 119  |
| TcMYB3 | ATMYB59-3 | 59.09 | 88  | 36  | 0 | 1   | 264 | 27  | 114 | 3.00E-35 | 117  |
| TcMYB3 | ATMYB87   | 62.79 | 86  | 31  | 1 | 4   | 258 | 32  | 117 | 6.00E-35 | 119  |
| TcMYB3 | ATMYB75   | 60.71 | 84  | 33  | 0 | 4   | 255 | 28  | 111 | 6.00E-35 | 117  |
| TcMYB3 | ATMYB90   | 60.71 | 84  | 33  | 0 | 4   | 255 | 28  | 111 | 6.00E-35 | 117  |
| TcMYB3 | ATMYB48   | 57.95 | 88  | 37  | 0 | 1   | 264 | 26  | 113 | 8.00E-35 | 117  |
| TcMYB3 | AtMYB113  | 36.46 | 181 | 108 | 3 | 4   | 525 | 28  | 206 | 7.00E-34 | 114  |
| TcMYB3 | AtMYB27   | 60.24 | 83  | 33  | 0 | 7   | 255 | 30  | 112 | 6.00E-33 | 112  |
| TcMYB3 | ATMYB78   | 40    | 160 | 82  | 3 | 4   | 441 | 46  | 202 | 8.00E-33 | 113  |
| TcMYB3 | AtMYB104  | 48.89 | 90  | 46  | 1 | 4   | 273 | 36  | 124 | 3.00E-28 | 102  |
| TcMYB3 | ATMYB119  | 35.19 | 162 | 90  | 7 | 4   | 444 | 123 | 279 | 2.00E-23 | 89.7 |
| TcMYB3 | ATMYB119  | 18.06 | 144 | 107 | 4 | 100 | 498 | 102 | 233 | 5.00E-04 | 32.7 |
| TcMYB3 | ATMYB118  | 45.92 | 98  | 50  | 3 | 1   | 285 | 206 | 301 | 6.00E-23 | 88.2 |
| TcMYB3 | ATMYB25   | 36.13 | 155 | 91  | 4 | 52  | 492 | 83  | 233 | 8.00E-23 | 87.4 |
| TcMYB3 | AtMYB64   | 47.06 | 85  | 44  | 2 | 4   | 255 | 123 | 205 | 8.00E-23 | 87.8 |
| TcMYB3 | AtMYB98   | 51.47 | 68  | 33  | 0 | 52  | 255 | 250 | 317 | 1.00E-22 | 87.4 |
| TcMYB3 | AtMYB98   | 26.98 | 63  | 45  | 1 | 79  | 264 | 207 | 269 | 3.00E-05 | 36.2 |
| TcMYB3 | AtMYB100  | 45.57 | 79  | 41  | 1 | 52  | 282 | 59  | 137 | 3.00E-22 | 84   |
| TcMYB3 | AtMYB109  | 55.88 | 68  | 30  | 0 | 52  | 255 | 89  | 156 | 9.00E-22 | 84.7 |
| TcMYB3 | ATMYB73   | 47.06 | 85  | 44  | 2 | 4   | 255 | 31  | 113 | 2.00E-21 | 83.2 |
| TcMYB3 | AtMYB1    | 54.41 | 68  | 31  | 0 | 52  | 255 | 88  | 155 | 2.00E-21 | 83.6 |
| TcMYB3 | AtMYB1    | 25.51 | 98  | 62  | 2 | 94  | 354 | 50  | 147 | 8.00E-05 | 35   |
| TcMYB3 | AtMYB115  | 36.11 | 108 | 67  | 1 | 52  | 369 | 191 | 298 | 5.00E-21 | 82.4 |
| TcMYB3 | ATMYB54   | 45.45 | 88  | 47  | 2 | 4   | 264 | 24  | 109 | 2.00E-20 | 79.3 |
| TcMYB3 | ATMYB44   | 34.56 | 136 | 74  | 4 | 52  | 414 | 39  | 174 | 2.00E-20 | 80.1 |
| TcMYB3 | ATMYB105  | 40.2  | 102 | 61  | 2 | 34  | 339 | 136 | 231 | 3.00E-20 | 79.7 |
| TcMYB3 | AtMYB70   | 47.06 | 85  | 44  | 2 | 4   | 255 | 31  | 113 | 4.00E-20 | 79.3 |
| TcMYB3 | ATMYB52   | 47.67 | 86  | 39  | 2 | 34  | 273 | 34  | 117 | 7.00E-20 | 77.8 |
| TcMYB3 | AtMYB117  | 46.75 | 77  | 41  | 1 | 34  | 264 | 127 | 201 | 8.00E-20 | 79   |
| TcMYB3 | ATMYB77   | 48.53 | 68  | 35  | 0 | 52  | 255 | 39  | 106 | 1.00E-19 | 77.8 |
| TcMYB3 | ATMYB110  | 46.48 | 71  | 38  | 0 | 52  | 264 | 100 | 170 | 1.00E-19 | 77.8 |
| TcMYB3 | AtMYB56   | 32.31 | 130 | 80  | 1 | 52  | 417 | 126 | 255 | 2.00E-19 | 77.4 |
| TcMYB3 | AtMYB22   | 42.47 | 73  | 42  | 0 | 52  | 270 | 86  | 158 | 4.00E-19 | 75.9 |
| TcMYB3 | ATMYB91   | 28.23 | 209 | 123 | 5 | 46  | 591 | 38  | 243 | 1.00E-18 | 75.9 |
| TcMYB3 | ATMYB69   | 37.23 | 94  | 59  | 0 | 52  | 333 | 52  | 145 | 7.00E-18 | 72.4 |
| TcMYB3 | AtMYB124  | 43.28 | 67  | 38  | 0 | 61  | 261 | 61  | 127 | 7.00E-15 | 65.1 |
| TcMYB3 | ATMYB88   | 43.28 | 67  | 38  | 0 | 61  | 261 | 66  | 132 | 1.00E-14 | 64.7 |
| TcMYB3 | AtMYB89   | 32.47 | 77  | 52  | 0 | 52  | 282 | 89  | 165 | 5.00E-14 | 60.8 |
| TcMYB4 | ATMYB33   | 65.52 | 174 | 57  | 2 | 43  | 555 | 4   | 174 | 1.00E-77 | 235  |
| TcMYB4 | ATMYB120  | 66.87 | 163 | 52  | 2 | 67  | 549 | 9   | 167 | 6.00E-74 | 226  |
| TcMYB4 | ATMYB65   | 69.18 | 146 | 45  | 1 | 118 | 555 | 41  | 185 | 2.00E-73 | 225  |
| TcMYB4 | ATMYB101  | 84.03 | 119 | 19  | 0 | 118 | 474 | 18  | 136 | 8.00E-73 | 222  |
| TcMYB4 | AtMYB97   | 71.32 | 136 | 39  | 1 | 91  | 498 | 10  | 142 | 2.00E-69 | 210  |
| TcMYB4 | AtMYB81   | 56.42 | 179 | 70  | 3 | 91  | 603 | 7   | 182 | 9.00E-67 | 204  |
| TcMYB4 | AtMYB17   | 65.38 | 104 | 36  | 0 | 118 | 429 | 12  | 115 | 3.00E-51 | 161  |
| TcMYB4 | ATMYB5    | 50.74 | 136 | 66  | 2 | 118 | 522 | 23  | 155 | 3.00E-51 | 159  |
| TcMYB4 | AtMYB74   | 51.7  | 147 | 68  | 3 | 118 | 549 | 13  | 156 | 4.00E-51 | 161  |
| TcMYB4 | ATMYB102  | 65.38 | 104 | 36  | 0 | 118 | 429 | 12  | 115 | 5.00E-51 | 162  |

|        |           |       |     |    |   |     |     |    |     |          |     |
|--------|-----------|-------|-----|----|---|-----|-----|----|-----|----------|-----|
| TcMYB4 | AtMYB107  | 65.38 | 104 | 36 | 0 | 118 | 429 | 12 | 115 | 7.00E-51 | 160 |
| TcMYB4 | ATMYB3    | 63.46 | 104 | 38 | 0 | 118 | 429 | 12 | 115 | 1.00E-50 | 158 |
| TcMYB4 | ATMYB66   | 42.19 | 192 | 92 | 5 | 79  | 597 | 3  | 192 | 2.00E-50 | 156 |
| TcMYB4 | AtMYB41   | 61.54 | 104 | 40 | 0 | 118 | 429 | 12 | 115 | 2.00E-50 | 158 |
| TcMYB4 | AtMYB9    | 62.62 | 107 | 40 | 0 | 118 | 438 | 12 | 118 | 6.00E-50 | 159 |
| TcMYB4 | AtMYB6    | 65.69 | 102 | 35 | 0 | 124 | 429 | 14 | 115 | 9.00E-50 | 155 |
| TcMYB4 | MYB8      | 62.5  | 104 | 39 | 0 | 118 | 429 | 12 | 115 | 2.00E-49 | 154 |
| TcMYB4 | ATMYB14   | 59.63 | 109 | 44 | 0 | 118 | 444 | 12 | 120 | 3.00E-49 | 154 |
| TcMYB4 | ATMYB15   | 44.17 | 163 | 91 | 0 | 118 | 606 | 12 | 174 | 3.00E-49 | 155 |
| TcMYB4 | AtMYB79   | 62.86 | 105 | 39 | 0 | 121 | 435 | 7  | 111 | 4.00E-49 | 154 |
| TcMYB4 | ATMYB57   | 60.19 | 108 | 43 | 0 | 112 | 435 | 23 | 130 | 4.00E-49 | 152 |
| TcMYB4 | MYB7      | 63.46 | 104 | 38 | 0 | 118 | 429 | 12 | 115 | 4.00E-49 | 154 |
| TcMYB4 | ATMYB106  | 51.8  | 139 | 66 | 2 | 118 | 531 | 55 | 190 | 1.00E-48 | 156 |
| TcMYB4 | ATMYB28   | 49.08 | 163 | 75 | 4 | 103 | 567 | 8  | 166 | 2.00E-48 | 155 |
| TcMYB4 | ATMYB96   | 52.94 | 136 | 63 | 1 | 118 | 522 | 12 | 147 | 2.00E-48 | 155 |
| TcMYB4 | AtMYB32   | 54.62 | 130 | 58 | 2 | 124 | 510 | 14 | 138 | 2.00E-48 | 153 |
| TcMYB4 | ATMYB4    | 64.71 | 102 | 36 | 0 | 124 | 429 | 14 | 115 | 2.00E-48 | 153 |
| TcMYB4 | ATMYB3    | 54.4  | 125 | 52 | 1 | 79  | 438 | 2  | 126 | 3.00E-48 | 151 |
| TcMYB4 | ATMYB92   | 63.46 | 104 | 38 | 0 | 118 | 429 | 12 | 115 | 3.00E-48 | 154 |
| TcMYB4 | AtMYB53   | 61.54 | 104 | 40 | 0 | 118 | 429 | 12 | 115 | 5.00E-48 | 153 |
| TcMYB4 | AtMYB51   | 54.07 | 135 | 60 | 2 | 118 | 516 | 13 | 147 | 7.00E-48 | 154 |
| TcMYB4 | AtMYB24   | 54.31 | 116 | 53 | 0 | 79  | 426 | 4  | 119 | 9.00E-48 | 149 |
| TcMYB4 | ATMYB71   | 60.95 | 105 | 41 | 0 | 121 | 435 | 19 | 123 | 1.00E-47 | 151 |
| TcMYB4 | ATMYB16   | 60.58 | 104 | 41 | 0 | 118 | 429 | 12 | 115 | 1.00E-47 | 152 |
| TcMYB4 | ATMYB13   | 48.67 | 150 | 65 | 2 | 118 | 531 | 12 | 151 | 1.00E-47 | 150 |
| TcMYB4 | AtMYB49   | 55.56 | 126 | 53 | 2 | 118 | 486 | 12 | 137 | 1.00E-47 | 152 |
| TcMYB4 | ATMYB30   | 60.38 | 106 | 42 | 0 | 112 | 429 | 10 | 115 | 1.00E-47 | 152 |
| TcMYB4 | AtMYB76   | 47.68 | 151 | 64 | 2 | 103 | 510 | 8  | 157 | 1.00E-47 | 152 |
| TcMYB4 | AtMYB50   | 48.59 | 142 | 70 | 2 | 118 | 534 | 12 | 153 | 2.00E-47 | 151 |
| TcMYB4 | ATMYB94   | 58.88 | 107 | 44 | 0 | 118 | 438 | 12 | 118 | 3.00E-47 | 151 |
| TcMYB4 | AtMYB60   | 61.54 | 104 | 40 | 0 | 118 | 429 | 12 | 115 | 4.00E-47 | 150 |
| TcMYB4 | AtMYB93   | 61.54 | 104 | 40 | 0 | 118 | 429 | 12 | 115 | 5.00E-47 | 152 |
| TcMYB4 | ATMYB58   | 47.1  | 138 | 73 | 0 | 118 | 531 | 14 | 151 | 6.00E-47 | 149 |
| TcMYB4 | ATMYB63   | 58.88 | 107 | 44 | 0 | 118 | 438 | 14 | 120 | 7.00E-47 | 149 |
| TcMYB4 | ATMYB29   | 62.04 | 108 | 41 | 1 | 103 | 426 | 8  | 114 | 1.00E-46 | 150 |
| TcMYB4 | ATMYB86   | 54.33 | 127 | 57 | 2 | 118 | 495 | 12 | 135 | 1.00E-46 | 150 |
| TcMYB4 | ATMYB121  | 51.08 | 139 | 59 | 1 | 121 | 510 | 28 | 166 | 1.00E-46 | 148 |
| TcMYB4 | ATMYB31   | 60.58 | 104 | 41 | 0 | 118 | 429 | 12 | 115 | 3.00E-46 | 149 |
| TcMYB4 | ATMYB34   | 59.81 | 107 | 43 | 0 | 118 | 438 | 12 | 118 | 3.00E-46 | 148 |
| TcMYB4 | AtMYB20   | 53.17 | 126 | 57 | 2 | 118 | 489 | 12 | 137 | 4.00E-46 | 147 |
| TcMYB4 | ATMYB23   | 57.28 | 103 | 44 | 0 | 121 | 429 | 13 | 115 | 5.00E-46 | 145 |
| TcMYB4 | ATMYB99   | 52.55 | 137 | 54 | 4 | 118 | 495 | 13 | 146 | 5.00E-46 | 146 |
| TcMYB4 | AtMYB116  | 50.83 | 120 | 59 | 1 | 79  | 438 | 6  | 124 | 9.00E-46 | 146 |
| TcMYB4 | AtMYB43   | 52.99 | 134 | 61 | 2 | 118 | 513 | 12 | 145 | 9.00E-46 | 147 |
| TcMYB4 | AtMYB85   | 50    | 140 | 68 | 3 | 118 | 531 | 12 | 150 | 1.00E-45 | 145 |
| TcMYB4 | ATMYB87   | 58.49 | 106 | 43 | 1 | 115 | 429 | 11 | 116 | 2.00E-45 | 146 |
| TcMYB4 | ATMYB46   | 57.01 | 107 | 46 | 0 | 118 | 438 | 18 | 124 | 2.00E-45 | 145 |
| TcMYB4 | AtMYB62   | 51.64 | 122 | 59 | 1 | 73  | 438 | 6  | 125 | 2.00E-45 | 145 |
| TcMYB4 | ATMYB61   | 58.88 | 107 | 44 | 0 | 118 | 438 | 12 | 118 | 2.00E-45 | 147 |
| TcMYB4 | ATMYB80   | 56.19 | 105 | 46 | 0 | 115 | 429 | 11 | 115 | 4.00E-45 | 145 |
| TcMYB4 | ATMYB67   | 49.28 | 138 | 69 | 2 | 106 | 516 | 18 | 152 | 4.00E-45 | 145 |
| TcMYB4 | AtMYB42   | 58.65 | 104 | 43 | 0 | 118 | 429 | 12 | 115 | 5.00E-45 | 144 |
| TcMYB4 | AtMYB82   | 52.14 | 117 | 53 | 1 | 106 | 447 | 8  | 124 | 6.00E-45 | 142 |
| TcMYB4 | ATMYB111  | 57.69 | 104 | 44 | 0 | 118 | 429 | 12 | 115 | 7.00E-45 | 145 |
| TcMYB4 | ATMYB0    | 57.28 | 103 | 44 | 0 | 121 | 429 | 15 | 117 | 9.00E-45 | 142 |
| TcMYB4 | ATMYB95   | 57.69 | 104 | 44 | 0 | 118 | 429 | 12 | 115 | 2.00E-44 | 142 |
| TcMYB4 | ATMYB72   | 56.73 | 104 | 45 | 0 | 118 | 429 | 14 | 117 | 3.00E-44 | 143 |
| TcMYB4 | AtMYB112  | 52.83 | 106 | 50 | 0 | 118 | 435 | 32 | 137 | 3.00E-44 | 141 |
| TcMYB4 | ATMYB122  | 45.96 | 161 | 73 | 3 | 118 | 558 | 12 | 172 | 3.00E-44 | 144 |
| TcMYB4 | AtMYB108  | 54.21 | 107 | 49 | 0 | 118 | 438 | 19 | 125 | 4.00E-44 | 143 |
| TcMYB4 | ATMYB12   | 55.77 | 104 | 46 | 0 | 118 | 429 | 12 | 115 | 4.00E-44 | 144 |
| TcMYB4 | AtMYB83   | 41.77 | 158 | 86 | 1 | 94  | 549 | 22 | 179 | 6.00E-44 | 143 |
| TcMYB4 | ATMYB59-3 | 54.87 | 113 | 50 | 1 | 121 | 456 | 9  | 121 | 6.00E-44 | 140 |
| TcMYB4 | ATMYB84   | 44.65 | 159 | 73 | 2 | 115 | 546 | 11 | 169 | 7.00E-44 | 142 |
| TcMYB4 | ATMYB2    | 54.72 | 106 | 48 | 0 | 118 | 435 | 20 | 125 | 8.00E-44 | 141 |
| TcMYB4 | AtMYB36   | 47.22 | 144 | 71 | 3 | 115 | 531 | 11 | 146 | 9.00E-44 | 142 |
| TcMYB4 | ATMYB123  | 54.81 | 104 | 47 | 0 | 118 | 429 | 14 | 117 | 1.00E-43 | 140 |
| TcMYB4 | ATMYB35   | 54.29 | 105 | 48 | 0 | 115 | 429 | 11 | 115 | 1.00E-43 | 142 |
| TcMYB4 | ATMYB11   | 54.81 | 104 | 47 | 0 | 118 | 429 | 12 | 115 | 2.00E-43 | 142 |
| TcMYB4 | ATMYB48   | 53.98 | 113 | 51 | 1 | 121 | 456 | 8  | 120 | 2.00E-43 | 139 |
| TcMYB4 | ATMYB55   | 55.08 | 118 | 41 | 1 | 118 | 435 | 12 | 129 | 3.00E-43 | 141 |
| TcMYB4 | ATMYB68   | 43.29 | 164 | 88 | 2 | 115 | 591 | 11 | 174 | 4.00E-43 | 142 |
| TcMYB4 | AtMYB40   | 48.15 | 135 | 67 | 2 | 118 | 513 | 12 | 146 | 5.00E-43 | 139 |
| TcMYB4 | AtMYB10   | 56.73 | 104 | 45 | 0 | 118 | 429 | 14 | 117 | 5.00E-43 | 138 |
| TcMYB4 | AtMYB103  | 55.14 | 107 | 48 | 0 | 118 | 438 | 12 | 118 | 7.00E-43 | 141 |
| TcMYB4 | ATMYB26   | 52.21 | 113 | 45 | 1 | 118 | 429 | 12 | 124 | 8.00E-42 | 138 |
| TcMYB4 | AtMYB47   | 52.73 | 110 | 51 | 1 | 118 | 444 | 12 | 121 | 9.00E-42 | 135 |
| TcMYB4 | ATMYB38   | 48.12 | 133 | 68 | 2 | 115 | 510 | 11 | 142 | 9.00E-42 | 136 |
| TcMYB4 | AtMYB104  | 52.99 | 117 | 55 | 0 | 124 | 474 | 18 | 134 | 1.00E-41 | 138 |
| TcMYB4 | AtMYB114  | 48.6  | 107 | 55 | 0 | 109 | 429 | 5  | 111 | 2.00E-41 | 131 |

|        |          |       |     |     |   |     |     |     |     |          |      |
|--------|----------|-------|-----|-----|---|-----|-----|-----|-----|----------|------|
| TcMYB4 | ATMYB37  | 54.29 | 105 | 47  | 1 | 118 | 429 | 12  | 116 | 7.00E-41 | 135  |
| TcMYB4 | AtMYB45  | 43.14 | 153 | 78  | 2 | 121 | 552 | 19  | 169 | 2.00E-40 | 132  |
| TcMYB4 | AtMYB27  | 53.77 | 106 | 49  | 0 | 115 | 432 | 8   | 113 | 1.00E-39 | 129  |
| TcMYB4 | ATMYB75  | 47.66 | 107 | 56  | 0 | 109 | 429 | 5   | 111 | 1.00E-39 | 129  |
| TcMYB4 | ATMYB78  | 46.28 | 121 | 51  | 1 | 118 | 438 | 26  | 146 | 4.00E-39 | 130  |
| TcMYB4 | AtMYB113 | 48.08 | 104 | 54  | 0 | 118 | 429 | 8   | 111 | 1.00E-38 | 127  |
| TcMYB4 | AtMYB19  | 52.29 | 109 | 52  | 0 | 121 | 447 | 13  | 121 | 1.00E-38 | 127  |
| TcMYB4 | ATMYB90  | 47.66 | 107 | 56  | 0 | 109 | 429 | 5   | 111 | 3.00E-38 | 126  |
| TcMYB4 | AtMYB18  | 50.49 | 103 | 51  | 0 | 121 | 429 | 11  | 113 | 2.00E-35 | 120  |
| TcMYB4 | AtMYB98  | 45.93 | 135 | 72  | 4 | 31  | 432 | 195 | 317 | 2.00E-34 | 120  |
| TcMYB4 | AtMYB1   | 44.97 | 149 | 69  | 3 | 22  | 429 | 9   | 155 | 2.00E-34 | 119  |
| TcMYB4 | AtMYB70  | 53.92 | 102 | 47  | 1 | 124 | 429 | 13  | 113 | 8.00E-34 | 116  |
| TcMYB4 | ATMYB119 | 50.46 | 109 | 53  | 3 | 109 | 432 | 100 | 205 | 2.00E-33 | 117  |
| TcMYB4 | ATMYB73  | 51.96 | 102 | 49  | 1 | 124 | 429 | 13  | 113 | 3.00E-33 | 115  |
| TcMYB4 | ATMYB118 | 44.53 | 137 | 76  | 2 | 115 | 525 | 186 | 320 | 4.00E-33 | 116  |
| TcMYB4 | AtMYB109 | 50.44 | 113 | 55  | 2 | 94  | 429 | 46  | 156 | 1.00E-32 | 114  |
| TcMYB4 | AtMYB115 | 43.48 | 138 | 76  | 4 | 19  | 426 | 129 | 257 | 2.00E-32 | 113  |
| TcMYB4 | AtMYB64  | 50    | 104 | 51  | 3 | 124 | 432 | 105 | 205 | 9.00E-32 | 112  |
| TcMYB4 | ATMYB77  | 47.66 | 107 | 56  | 1 | 124 | 444 | 6   | 111 | 8.00E-31 | 108  |
| TcMYB4 | ATMYB44  | 50    | 102 | 51  | 1 | 124 | 429 | 6   | 106 | 8.00E-31 | 108  |
| TcMYB4 | AtMYB100 | 49.07 | 108 | 54  | 2 | 118 | 438 | 24  | 129 | 1.00E-30 | 105  |
| TcMYB4 | ATMYB25  | 49.54 | 109 | 54  | 2 | 106 | 429 | 44  | 150 | 2.00E-30 | 108  |
| TcMYB4 | AtMYB117 | 41.73 | 139 | 75  | 3 | 55  | 453 | 70  | 206 | 4.00E-30 | 107  |
| TcMYB4 | ATMYB105 | 45.22 | 115 | 62  | 2 | 97  | 438 | 98  | 210 | 5.00E-30 | 106  |
| TcMYB4 | AtMYB56  | 48.57 | 105 | 54  | 1 | 124 | 438 | 93  | 196 | 6.00E-30 | 106  |
| TcMYB4 | ATMYB52  | 46.96 | 115 | 60  | 2 | 124 | 465 | 5   | 117 | 8.00E-30 | 104  |
| TcMYB4 | ATMYB69  | 45.87 | 109 | 58  | 2 | 115 | 438 | 16  | 122 | 1.00E-29 | 103  |
| TcMYB4 | ATMYB54  | 36.57 | 175 | 109 | 5 | 124 | 642 | 6   | 171 | 1.00E-29 | 103  |
| TcMYB4 | ATMYB110 | 42.19 | 128 | 74  | 2 | 55  | 438 | 48  | 170 | 3.00E-28 | 101  |
| TcMYB4 | AtMYB22  | 40.3  | 134 | 80  | 3 | 37  | 438 | 30  | 156 | 4.00E-27 | 97.4 |
| TcMYB4 | ATMYB91  | 40.38 | 104 | 60  | 1 | 133 | 438 | 7   | 110 | 2.00E-25 | 94.7 |
| TcMYB4 | AtMYB89  | 36.09 | 133 | 82  | 3 | 127 | 516 | 57  | 178 | 1.00E-20 | 78.6 |
| TcMYB4 | AtMYB124 | 34.65 | 101 | 66  | 1 | 133 | 435 | 28  | 127 | 1.00E-18 | 76.3 |
| TcMYB4 | ATMYB88  | 31.68 | 101 | 69  | 1 | 133 | 435 | 33  | 132 | 2.00E-16 | 70.1 |
| TcMYB5 | AtMYB117 | 73.38 | 154 | 33  | 3 | 10  | 447 | 74  | 225 | 4.00E-77 | 228  |
| TcMYB5 | ATMYB105 | 80    | 135 | 23  | 2 | 7   | 399 | 85  | 219 | 2.00E-76 | 225  |
| TcMYB5 | AtMYB56  | 70.9  | 134 | 38  | 2 | 4   | 402 | 73  | 204 | 7.00E-67 | 200  |
| TcMYB5 | ATMYB54  | 79.82 | 109 | 22  | 0 | 52  | 378 | 3   | 111 | 2.00E-66 | 197  |
| TcMYB5 | ATMYB52  | 77.98 | 109 | 24  | 0 | 52  | 378 | 2   | 110 | 3.00E-66 | 196  |
| TcMYB5 | ATMYB110 | 63.57 | 140 | 51  | 0 | 46  | 465 | 62  | 201 | 5.00E-65 | 195  |
| TcMYB5 | ATMYB69  | 65.62 | 128 | 44  | 1 | 1   | 384 | 1   | 126 | 7.00E-61 | 182  |
| TcMYB5 | AtMYB89  | 61.68 | 107 | 41  | 0 | 64  | 384 | 57  | 163 | 4.00E-48 | 148  |
| TcMYB5 | ATMYB44  | 59.41 | 101 | 41  | 0 | 61  | 363 | 6   | 106 | 2.00E-43 | 140  |
| TcMYB5 | AtMYB109 | 58.65 | 104 | 43  | 0 | 61  | 372 | 56  | 159 | 4.00E-43 | 141  |
| TcMYB5 | ATMYB25  | 54.39 | 114 | 52  | 0 | 31  | 372 | 40  | 153 | 4.00E-42 | 137  |
| TcMYB5 | AtMYB70  | 57.43 | 101 | 43  | 0 | 61  | 363 | 13  | 113 | 2.00E-41 | 134  |
| TcMYB5 | ATMYB73  | 56.44 | 101 | 44  | 0 | 61  | 363 | 13  | 113 | 3.00E-41 | 134  |
| TcMYB5 | ATMYB77  | 56.44 | 101 | 44  | 0 | 61  | 363 | 6   | 106 | 7.00E-41 | 133  |
| TcMYB5 | AtMYB1   | 51.85 | 108 | 52  | 0 | 61  | 384 | 55  | 162 | 4.00E-39 | 130  |
| TcMYB5 | ATMYB119 | 39.26 | 163 | 86  | 2 | 46  | 495 | 100 | 262 | 3.00E-34 | 118  |
| TcMYB5 | AtMYB115 | 40.41 | 146 | 82  | 3 | 52  | 474 | 155 | 297 | 3.00E-33 | 114  |
| TcMYB5 | AtMYB64  | 49.11 | 112 | 57  | 1 | 61  | 396 | 105 | 213 | 8.00E-33 | 114  |
| TcMYB5 | AtMYB98  | 42.62 | 122 | 70  | 0 | 61  | 426 | 217 | 338 | 2.00E-32 | 113  |
| TcMYB5 | ATMYB23  | 45.13 | 113 | 59  | 2 | 61  | 390 | 14  | 126 | 2.00E-32 | 108  |
| TcMYB5 | ATMYB67  | 49.55 | 111 | 54  | 3 | 37  | 363 | 17  | 125 | 7.00E-32 | 109  |
| TcMYB5 | ATMYB72  | 37.95 | 166 | 101 | 4 | 37  | 528 | 9   | 170 | 2.00E-31 | 108  |
| TcMYB5 | ATMYB66  | 47.06 | 102 | 53  | 1 | 61  | 363 | 18  | 119 | 2.00E-31 | 106  |
| TcMYB5 | ATMYB118 | 49.06 | 106 | 54  | 1 | 61  | 378 | 189 | 291 | 3.00E-31 | 110  |
| TcMYB5 | AtMYB45  | 35.53 | 152 | 93  | 3 | 61  | 501 | 20  | 171 | 3.00E-31 | 107  |
| TcMYB5 | AtMYB103 | 45.53 | 123 | 66  | 2 | 37  | 402 | 7   | 128 | 4.00E-31 | 108  |
| TcMYB5 | ATMYB0   | 44.64 | 112 | 60  | 2 | 61  | 390 | 16  | 127 | 4.00E-31 | 105  |
| TcMYB5 | ATMYB63  | 44.83 | 116 | 62  | 3 | 37  | 378 | 9   | 122 | 6.00E-31 | 107  |
| TcMYB5 | AtMYB10  | 44.83 | 116 | 62  | 3 | 37  | 378 | 9   | 122 | 2.00E-30 | 104  |
| TcMYB5 | AtMYB18  | 44.44 | 108 | 59  | 1 | 61  | 381 | 12  | 119 | 3.00E-30 | 105  |
| TcMYB5 | AtMYB100 | 46.46 | 99  | 52  | 2 | 67  | 360 | 28  | 125 | 4.00E-30 | 103  |
| TcMYB5 | AtMYB114 | 43.64 | 110 | 61  | 1 | 40  | 366 | 3   | 112 | 4.00E-30 | 100  |
| TcMYB5 | ATMYB15  | 33.53 | 167 | 101 | 3 | 37  | 507 | 6   | 172 | 6.00E-30 | 104  |
| TcMYB5 | AtMYB19  | 47.12 | 104 | 53  | 2 | 61  | 366 | 14  | 116 | 6.00E-30 | 103  |
| TcMYB5 | ATMYB121 | 40.48 | 126 | 74  | 1 | 43  | 417 | 23  | 148 | 9.00E-30 | 103  |
| TcMYB5 | AtMYB82  | 47.06 | 102 | 53  | 1 | 61  | 363 | 14  | 115 | 2.00E-29 | 100  |
| TcMYB5 | AtMYB97  | 40.88 | 137 | 77  | 2 | 31  | 429 | 11  | 147 | 3.00E-29 | 104  |
| TcMYB5 | ATMYB80  | 43.64 | 110 | 61  | 1 | 37  | 363 | 6   | 115 | 3.00E-29 | 103  |
| TcMYB5 | AtMYB51  | 46.08 | 102 | 54  | 1 | 61  | 363 | 15  | 116 | 3.00E-29 | 103  |
| TcMYB5 | AtMYB27  | 46.6  | 103 | 53  | 2 | 61  | 363 | 11  | 112 | 5.00E-29 | 100  |
| TcMYB5 | AtMYB53  | 49.51 | 103 | 50  | 2 | 61  | 363 | 14  | 115 | 5.00E-29 | 102  |
| TcMYB5 | ATMYB58  | 44.55 | 110 | 60  | 2 | 37  | 363 | 9   | 117 | 5.00E-29 | 101  |
| TcMYB5 | ATMYB35  | 45.45 | 110 | 59  | 2 | 37  | 363 | 7   | 115 | 5.00E-29 | 102  |
| TcMYB5 | ATMYB75  | 43.64 | 110 | 61  | 1 | 40  | 366 | 3   | 112 | 6.00E-29 | 100  |
| TcMYB5 | ATMYB65  | 34.15 | 164 | 86  | 2 | 34  | 459 | 34  | 197 | 8.00E-29 | 104  |
| TcMYB5 | AtMYB41  | 44.35 | 115 | 57  | 3 | 40  | 363 | 2   | 115 | 8.00E-29 | 101  |

|        |           |       |     |     |   |     |     |    |     |          |      |
|--------|-----------|-------|-----|-----|---|-----|-----|----|-----|----------|------|
| TcMYB5 | AtMYB50   | 38.89 | 144 | 86  | 3 | 34  | 459 | 5  | 141 | 1.00E-28 | 101  |
| TcMYB5 | ATMYB122  | 45.19 | 104 | 56  | 1 | 37  | 345 | 6  | 109 | 2.00E-28 | 101  |
| TcMYB5 | ATMYB86   | 40.8  | 125 | 72  | 2 | 34  | 402 | 5  | 128 | 2.00E-28 | 101  |
| TcMYB5 | AtMYB104  | 41.23 | 114 | 66  | 2 | 31  | 369 | 8  | 118 | 3.00E-28 | 101  |
| TcMYB5 | AtMYB6    | 34.62 | 156 | 96  | 4 | 40  | 489 | 2  | 151 | 3.00E-28 | 98.6 |
| TcMYB5 | AtMYB49   | 46.08 | 102 | 54  | 1 | 61  | 363 | 14 | 115 | 4.00E-28 | 100  |
| TcMYB5 | ATMYB34   | 40.65 | 123 | 72  | 1 | 37  | 402 | 6  | 128 | 5.00E-28 | 99.4 |
| TcMYB5 | ATMYB55   | 40    | 125 | 62  | 2 | 34  | 369 | 5  | 129 | 6.00E-28 | 100  |
| TcMYB5 | ATMYB92   | 48.54 | 103 | 51  | 2 | 61  | 363 | 14 | 115 | 7.00E-28 | 99.8 |
| TcMYB5 | AtMYB40   | 39.85 | 133 | 75  | 3 | 61  | 444 | 14 | 145 | 8.00E-28 | 98.2 |
| TcMYB5 | ATMYB33   | 36.6  | 153 | 77  | 3 | 61  | 459 | 34 | 186 | 9.00E-28 | 101  |
| TcMYB5 | AtMYB36   | 37.76 | 143 | 87  | 2 | 61  | 483 | 14 | 156 | 9.00E-28 | 99.4 |
| TcMYB5 | ATMYB61   | 40.8  | 125 | 72  | 2 | 34  | 402 | 5  | 128 | 1.00E-27 | 99.8 |
| TcMYB5 | ATMYB90   | 39.67 | 121 | 72  | 1 | 40  | 399 | 3  | 123 | 1.00E-27 | 97.4 |
| TcMYB5 | ATMYB71   | 38.93 | 131 | 76  | 3 | 61  | 441 | 20 | 149 | 1.00E-27 | 97.8 |
| TcMYB5 | AtMYB81   | 45.37 | 108 | 58  | 1 | 49  | 369 | 18 | 125 | 1.00E-27 | 100  |
| TcMYB5 | ATMYB101  | 46.67 | 105 | 54  | 2 | 61  | 369 | 20 | 123 | 1.00E-27 | 100  |
| TcMYB5 | ATMYB26   | 40.32 | 124 | 64  | 2 | 34  | 375 | 5  | 128 | 1.00E-27 | 99.4 |
| TcMYB5 | AtMYB107  | 44.55 | 110 | 60  | 2 | 37  | 363 | 7  | 115 | 2.00E-27 | 98.6 |
| TcMYB5 | ATMYB46   | 40.52 | 116 | 68  | 1 | 34  | 378 | 11 | 126 | 2.00E-27 | 97.8 |
| TcMYB5 | ATMYB3    | 41.23 | 114 | 61  | 2 | 40  | 363 | 2  | 115 | 3.00E-27 | 96.7 |
| TcMYB5 | MYB8      | 39.47 | 114 | 63  | 2 | 40  | 363 | 2  | 115 | 3.00E-27 | 95.5 |
| TcMYB5 | AtMYB74   | 41.82 | 110 | 63  | 1 | 37  | 363 | 7  | 116 | 3.00E-27 | 97.8 |
| TcMYB5 | ATMYB13   | 44.35 | 115 | 62  | 3 | 61  | 399 | 14 | 125 | 3.00E-27 | 96.3 |
| TcMYB5 | ATMYB13   | 29.03 | 62  | 44  | 1 | 61  | 246 | 67 | 127 | 0.001    | 31.2 |
| TcMYB5 | AtMYB9    | 42.98 | 114 | 59  | 2 | 40  | 363 | 2  | 115 | 4.00E-27 | 97.8 |
| TcMYB5 | ATMYB120  | 37.23 | 137 | 78  | 2 | 61  | 447 | 28 | 164 | 4.00E-27 | 99.4 |
| TcMYB5 | ATMYB59-3 | 43.4  | 106 | 58  | 2 | 61  | 372 | 10 | 114 | 5.00E-27 | 95.5 |
| TcMYB5 | ATMYB48   | 44.34 | 106 | 57  | 2 | 61  | 372 | 9  | 113 | 5.00E-27 | 95.9 |
| TcMYB5 | ATMYB123  | 36.3  | 135 | 85  | 2 | 61  | 462 | 16 | 139 | 6.00E-27 | 95.9 |
| TcMYB5 | ATMYB4    | 35.57 | 149 | 89  | 4 | 40  | 465 | 2  | 144 | 6.00E-27 | 96.3 |
| TcMYB5 | ATMYB95   | 33.54 | 161 | 104 | 4 | 61  | 534 | 14 | 162 | 7.00E-27 | 95.9 |
| TcMYB5 | ATMYB102  | 42.73 | 110 | 62  | 1 | 37  | 363 | 6  | 115 | 8.00E-27 | 97.1 |
| TcMYB5 | ATMYB5    | 40    | 115 | 68  | 1 | 61  | 402 | 25 | 139 | 9.00E-27 | 95.1 |
| TcMYB5 | AtMYB79   | 38.57 | 140 | 68  | 3 | 61  | 426 | 8  | 146 | 2.00E-26 | 94.7 |
| TcMYB5 | AtMYB93   | 42.98 | 114 | 59  | 2 | 40  | 363 | 2  | 115 | 2.00E-26 | 96.3 |
| TcMYB5 | ATMYB37   | 42.74 | 117 | 65  | 3 | 37  | 381 | 7  | 122 | 2.00E-26 | 95.5 |
| TcMYB5 | ATMYB84   | 44.66 | 103 | 55  | 2 | 61  | 363 | 14 | 116 | 3.00E-26 | 95.1 |
| TcMYB5 | AtMYB32   | 41.23 | 114 | 61  | 2 | 40  | 363 | 2  | 115 | 3.00E-26 | 94.4 |
| TcMYB5 | ATMYB14   | 41.07 | 112 | 63  | 2 | 37  | 363 | 6  | 115 | 4.00E-26 | 93.6 |
| TcMYB5 | ATMYB16   | 41.74 | 115 | 60  | 3 | 40  | 363 | 2  | 115 | 5.00E-26 | 94.7 |
| TcMYB5 | ATMYB68   | 34.62 | 156 | 94  | 4 | 61  | 504 | 14 | 169 | 6.00E-26 | 95.1 |
| TcMYB5 | AtMYB113  | 40.95 | 105 | 61  | 1 | 61  | 372 | 10 | 114 | 7.00E-26 | 92.8 |
| TcMYB5 | AtMYB43   | 40.8  | 125 | 72  | 2 | 61  | 429 | 14 | 137 | 9.00E-26 | 94   |
| TcMYB5 | ATMYB28   | 41.74 | 115 | 66  | 1 | 61  | 402 | 14 | 128 | 1.00E-25 | 94.4 |
| TcMYB5 | AtMYB76   | 37.42 | 155 | 91  | 3 | 61  | 507 | 14 | 168 | 1.00E-25 | 94   |
| TcMYB5 | ATMYB106  | 38.6  | 114 | 69  | 1 | 25  | 363 | 45 | 158 | 1.00E-25 | 94.4 |
| TcMYB5 | ATMYB2    | 46.32 | 95  | 50  | 1 | 61  | 342 | 22 | 116 | 1.00E-25 | 92.4 |
| TcMYB5 | AtMYB62   | 38.89 | 126 | 75  | 2 | 1   | 372 | 1  | 125 | 2.00E-25 | 92.4 |
| TcMYB5 | AtMYB17   | 44.66 | 103 | 55  | 2 | 61  | 363 | 14 | 115 | 2.00E-25 | 92.4 |
| TcMYB5 | AtMYB83   | 41.67 | 108 | 62  | 1 | 61  | 381 | 32 | 139 | 3.00E-25 | 92.8 |
| TcMYB5 | MYB7      | 38.6  | 114 | 64  | 2 | 40  | 363 | 2  | 115 | 4.00E-25 | 91.3 |
| TcMYB5 | AtMYB60   | 40.71 | 113 | 66  | 1 | 61  | 396 | 14 | 126 | 5.00E-25 | 91.3 |
| TcMYB5 | AtMYB47   | 38.24 | 102 | 62  | 1 | 61  | 363 | 14 | 115 | 5.00E-25 | 90.9 |
| TcMYB5 | AtMYB112  | 44.21 | 95  | 52  | 1 | 61  | 342 | 34 | 128 | 7.00E-25 | 90.1 |
| TcMYB5 | ATMYB38   | 43.69 | 103 | 56  | 2 | 61  | 363 | 14 | 116 | 8.00E-25 | 90.9 |
| TcMYB5 | ATMYB94   | 41.9  | 105 | 60  | 1 | 61  | 372 | 14 | 118 | 1.00E-24 | 91.3 |
| TcMYB5 | ATMYB29   | 46.88 | 96  | 50  | 1 | 61  | 345 | 14 | 109 | 1.00E-24 | 91.3 |
| TcMYB5 | AtMYB22   | 41.24 | 97  | 57  | 1 | 70  | 360 | 57 | 152 | 1.00E-24 | 89.7 |
| TcMYB5 | AtMYB22   | 31.11 | 45  | 31  | 0 | 211 | 345 | 52 | 96  | 2.00E-04 | 33.5 |
| TcMYB5 | AtMYB116  | 39.05 | 105 | 63  | 1 | 61  | 372 | 20 | 124 | 3.00E-24 | 89.4 |
| TcMYB5 | AtMYB42   | 41.44 | 111 | 63  | 2 | 37  | 363 | 6  | 115 | 3.00E-24 | 89.4 |
| TcMYB5 | ATMYB96   | 40.95 | 105 | 61  | 1 | 61  | 372 | 14 | 118 | 3.00E-24 | 90.1 |
| TcMYB5 | ATMYB88   | 37.61 | 109 | 68  | 0 | 70  | 396 | 33 | 141 | 4.00E-24 | 90.9 |
| TcMYB5 | AtMYB108  | 32.19 | 146 | 98  | 2 | 1   | 435 | 8  | 146 | 4.00E-24 | 89.4 |
| TcMYB5 | ATMYB30   | 42.16 | 102 | 58  | 1 | 61  | 363 | 14 | 115 | 6.00E-24 | 89   |
| TcMYB5 | AtMYB20   | 42.45 | 106 | 59  | 2 | 61  | 372 | 14 | 118 | 9.00E-24 | 87.8 |
| TcMYB5 | ATMYB31   | 42.16 | 102 | 58  | 1 | 61  | 363 | 14 | 115 | 1.00E-23 | 88.2 |
| TcMYB5 | ATMYB57   | 40.74 | 108 | 62  | 2 | 61  | 378 | 27 | 133 | 1.00E-23 | 85.9 |
| TcMYB5 | AtMYB85   | 43.69 | 103 | 56  | 2 | 61  | 363 | 14 | 115 | 3.00E-23 | 86.3 |
| TcMYB5 | ATMYB87   | 36.94 | 111 | 68  | 2 | 37  | 363 | 6  | 116 | 3.00E-23 | 86.7 |
| TcMYB5 | ATMYB3    | 30.52 | 154 | 106 | 2 | 61  | 519 | 22 | 174 | 4.00E-23 | 85.1 |
| TcMYB5 | AtMYB124  | 37.86 | 103 | 64  | 0 | 70  | 378 | 28 | 130 | 4.00E-23 | 87.8 |
| TcMYB5 | ATMYB111  | 40.2  | 102 | 60  | 1 | 61  | 363 | 14 | 115 | 5.00E-23 | 86.7 |
| TcMYB5 | AtMYB24   | 41.05 | 95  | 55  | 1 | 61  | 342 | 19 | 113 | 6.00E-23 | 84.3 |
| TcMYB5 | ATMYB91   | 34.15 | 123 | 78  | 1 | 61  | 420 | 4  | 126 | 7.00E-23 | 86.7 |
| TcMYB5 | ATMYB12   | 39.22 | 102 | 61  | 1 | 61  | 363 | 14 | 115 | 3.00E-22 | 84.7 |
| TcMYB5 | ATMYB11   | 39.22 | 102 | 61  | 1 | 61  | 363 | 14 | 115 | 4.00E-22 | 84.3 |
| TcMYB5 | ATMYB78   | 31.43 | 140 | 81  | 2 | 61  | 435 | 28 | 167 | 1.00E-20 | 79.7 |
| TcMYB5 | ATMYB99   | 36.76 | 136 | 77  | 4 | 61  | 441 | 15 | 144 | 2.00E-20 | 78.6 |

|        |           |       |     |     |   |    |     |     |     |          |     |
|--------|-----------|-------|-----|-----|---|----|-----|-----|-----|----------|-----|
| TcMYB6 | ATMYB77   | 46.47 | 269 | 139 | 9 | 1  | 792 | 1   | 235 | 1.00E-65 | 201 |
| TcMYB6 | ATMYB44   | 45.45 | 253 | 137 | 4 | 1  | 756 | 1   | 208 | 6.00E-63 | 194 |
| TcMYB6 | ATMYB73   | 43.6  | 250 | 141 | 3 | 7  | 756 | 10  | 211 | 1.00E-57 | 181 |
| TcMYB6 | AtMYB70   | 73.83 | 107 | 28  | 0 | 7  | 327 | 10  | 116 | 1.00E-54 | 173 |
| TcMYB6 | AtMYB109  | 66.67 | 114 | 38  | 1 | 10 | 351 | 54  | 163 | 4.00E-52 | 169 |
| TcMYB6 | AtMYB1    | 54.23 | 142 | 65  | 1 | 7  | 432 | 52  | 192 | 8.00E-50 | 163 |
| TcMYB6 | ATMYB25   | 65.05 | 103 | 36  | 0 | 10 | 318 | 48  | 150 | 2.00E-46 | 153 |
| TcMYB6 | ATMYB105  | 49.59 | 121 | 61  | 0 | 16 | 378 | 107 | 227 | 3.00E-40 | 136 |
| TcMYB6 | ATMYB54   | 55.45 | 101 | 45  | 0 | 16 | 318 | 6   | 106 | 1.00E-39 | 132 |
| TcMYB6 | ATMYB69   | 40.11 | 177 | 106 | 2 | 16 | 546 | 19  | 188 | 6.00E-39 | 130 |
| TcMYB6 | AtMYB117  | 55.88 | 102 | 45  | 0 | 16 | 321 | 98  | 199 | 6.00E-39 | 133 |
| TcMYB6 | ATMYB52   | 50.5  | 101 | 50  | 0 | 16 | 318 | 5   | 105 | 3.00E-37 | 126 |
| TcMYB6 | AtMYB98   | 56.73 | 104 | 45  | 0 | 13 | 324 | 216 | 319 | 6.00E-37 | 129 |
| TcMYB6 | AtMYB56   | 53.47 | 101 | 47  | 0 | 16 | 318 | 93  | 193 | 3.00E-36 | 125 |
| TcMYB6 | ATMYB119  | 51.33 | 113 | 55  | 0 | 13 | 351 | 104 | 216 | 4.00E-35 | 124 |
| TcMYB6 | ATMYB118  | 51.4  | 107 | 52  | 0 | 4  | 324 | 185 | 291 | 3.00E-34 | 122 |
| TcMYB6 | AtMYB64   | 49.56 | 113 | 57  | 0 | 13 | 351 | 104 | 216 | 9.00E-34 | 120 |
| TcMYB6 | ATMYB80   | 48.62 | 109 | 55  | 1 | 16 | 339 | 14  | 122 | 7.00E-33 | 116 |
| TcMYB6 | ATMYB110  | 42.86 | 133 | 65  | 1 | 16 | 381 | 67  | 199 | 1.00E-32 | 115 |
| TcMYB6 | AtMYB36   | 36.47 | 170 | 106 | 4 | 16 | 519 | 14  | 173 | 2.00E-32 | 115 |
| TcMYB6 | AtMYB115  | 48.54 | 103 | 53  | 0 | 16 | 324 | 158 | 260 | 2.00E-32 | 116 |
| TcMYB6 | AtMYB82   | 40    | 155 | 91  | 4 | 16 | 474 | 14  | 155 | 3.00E-32 | 112 |
| TcMYB6 | ATMYB14   | 43.61 | 133 | 73  | 3 | 16 | 408 | 14  | 142 | 3.00E-32 | 113 |
| TcMYB6 | ATMYB121  | 48.62 | 109 | 54  | 2 | 16 | 336 | 29  | 136 | 2.00E-31 | 112 |
| TcMYB6 | AtMYB45   | 41.67 | 156 | 88  | 5 | 16 | 474 | 20  | 168 | 2.00E-31 | 111 |
| TcMYB6 | ATMYB46   | 40.67 | 150 | 87  | 2 | 16 | 459 | 20  | 169 | 2.00E-31 | 112 |
| TcMYB6 | ATMYB92   | 51.46 | 103 | 48  | 2 | 16 | 318 | 14  | 115 | 2.00E-31 | 113 |
| TcMYB6 | ATMYB67   | 31.75 | 252 | 167 | 8 | 16 | 756 | 24  | 233 | 2.00E-31 | 112 |
| TcMYB6 | ATMYB61   | 42.25 | 142 | 80  | 3 | 16 | 435 | 14  | 151 | 2.00E-31 | 113 |
| TcMYB6 | AtMYB17   | 38.32 | 167 | 101 | 5 | 16 | 510 | 14  | 170 | 5.00E-31 | 111 |
| TcMYB6 | ATMYB37   | 42.25 | 142 | 80  | 3 | 16 | 435 | 14  | 153 | 6.00E-31 | 111 |
| TcMYB6 | ATMYB13   | 37.29 | 177 | 109 | 4 | 16 | 540 | 14  | 176 | 6.00E-31 | 109 |
| TcMYB6 | ATMYB58   | 43.36 | 143 | 79  | 4 | 16 | 438 | 16  | 152 | 8.00E-31 | 110 |
| TcMYB6 | AtMYB41   | 44.8  | 125 | 68  | 1 | 16 | 387 | 14  | 138 | 9.00E-31 | 110 |
| TcMYB6 | AtMYB74   | 42.54 | 134 | 76  | 1 | 16 | 414 | 15  | 148 | 1.00E-30 | 110 |
| TcMYB6 | ATMYB102  | 41.13 | 141 | 82  | 1 | 16 | 435 | 14  | 154 | 1.00E-30 | 111 |
| TcMYB6 | ATMYB59-3 | 37.33 | 150 | 92  | 3 | 16 | 459 | 10  | 146 | 1.00E-30 | 108 |
| TcMYB6 | ATMYB35   | 36.6  | 153 | 95  | 2 | 16 | 468 | 14  | 166 | 1.00E-30 | 110 |
| TcMYB6 | ATMYB95   | 38.16 | 152 | 91  | 3 | 16 | 462 | 14  | 164 | 1.00E-30 | 109 |
| TcMYB6 | AtMYB51   | 33.86 | 189 | 123 | 4 | 16 | 576 | 15  | 198 | 2.00E-30 | 110 |
| TcMYB6 | AtMYB27   | 41.26 | 143 | 77  | 4 | 16 | 423 | 11  | 150 | 3.00E-30 | 107 |
| TcMYB6 | ATMYB101  | 49.02 | 102 | 51  | 1 | 16 | 318 | 20  | 121 | 3.00E-30 | 112 |
| TcMYB6 | AtMYB79   | 34.41 | 186 | 118 | 5 | 16 | 561 | 8   | 178 | 3.00E-30 | 108 |
| TcMYB6 | ATMYB72   | 50.49 | 103 | 49  | 2 | 16 | 318 | 16  | 117 | 3.00E-30 | 108 |
| TcMYB6 | AtMYB107  | 49.02 | 102 | 51  | 1 | 16 | 318 | 14  | 115 | 7.00E-30 | 108 |
| TcMYB6 | AtMYB97   | 52.48 | 101 | 47  | 1 | 16 | 315 | 21  | 121 | 7.00E-30 | 109 |
| TcMYB6 | ATMYB48   | 34.15 | 164 | 104 | 3 | 16 | 495 | 9   | 171 | 8.00E-30 | 107 |
| TcMYB6 | ATMYB34   | 47.71 | 109 | 56  | 1 | 16 | 339 | 14  | 122 | 8.00E-30 | 107 |
| TcMYB6 | ATMYB65   | 33.8  | 216 | 138 | 4 | 16 | 648 | 43  | 243 | 1.00E-29 | 110 |
| TcMYB6 | AtMYB50   | 36.65 | 191 | 110 | 5 | 16 | 555 | 14  | 203 | 1.00E-29 | 107 |
| TcMYB6 | AtMYB60   | 37.09 | 151 | 88  | 3 | 16 | 447 | 14  | 160 | 1.00E-29 | 107 |
| TcMYB6 | AtMYB83   | 48.31 | 118 | 60  | 2 | 16 | 366 | 32  | 147 | 2.00E-29 | 107 |
| TcMYB6 | AtMYB53   | 49.51 | 103 | 50  | 2 | 16 | 318 | 14  | 115 | 2.00E-29 | 107 |
| TcMYB6 | ATMYB63   | 46.9  | 113 | 55  | 3 | 16 | 339 | 16  | 127 | 2.00E-29 | 106 |
| TcMYB6 | AtMYB49   | 39.44 | 142 | 85  | 1 | 16 | 438 | 14  | 155 | 2.00E-29 | 107 |
| TcMYB6 | ATMYB26   | 48.65 | 111 | 47  | 2 | 16 | 318 | 14  | 124 | 3.00E-29 | 107 |
| TcMYB6 | AtMYB47   | 35.06 | 174 | 101 | 3 | 16 | 501 | 14  | 186 | 4.00E-29 | 105 |
| TcMYB6 | ATMYB16   | 36.99 | 173 | 108 | 2 | 16 | 531 | 14  | 180 | 4.00E-29 | 106 |
| TcMYB6 | AtMYB32   | 40.91 | 154 | 89  | 4 | 16 | 471 | 14  | 159 | 4.00E-29 | 105 |
| TcMYB6 | ATMYB33   | 50.98 | 102 | 49  | 1 | 16 | 318 | 34  | 135 | 6.00E-29 | 108 |
| TcMYB6 | AtMYB9    | 49.02 | 102 | 51  | 1 | 16 | 318 | 14  | 115 | 6.00E-29 | 106 |
| TcMYB6 | AtMYB19   | 41.43 | 140 | 80  | 3 | 16 | 429 | 14  | 144 | 7.00E-29 | 104 |
| TcMYB6 | AtMYB103  | 38.89 | 144 | 87  | 1 | 16 | 444 | 14  | 157 | 7.00E-29 | 106 |
| TcMYB6 | ATMYB86   | 41.26 | 143 | 80  | 3 | 16 | 432 | 14  | 155 | 8.00E-29 | 106 |
| TcMYB6 | ATMYB15   | 37.75 | 151 | 89  | 3 | 16 | 453 | 14  | 163 | 1.00E-28 | 104 |
| TcMYB6 | ATMYB3    | 43.48 | 115 | 64  | 1 | 16 | 357 | 14  | 128 | 2.00E-28 | 103 |
| TcMYB6 | AtMYB100  | 31.32 | 182 | 123 | 3 | 25 | 564 | 29  | 206 | 2.00E-28 | 102 |
| TcMYB6 | ATMYB87   | 48.54 | 103 | 51  | 2 | 16 | 318 | 14  | 116 | 2.00E-28 | 104 |
| TcMYB6 | MYB8      | 47.06 | 102 | 53  | 1 | 16 | 318 | 14  | 115 | 2.00E-28 | 102 |
| TcMYB6 | AtMYB116  | 44.35 | 115 | 63  | 2 | 4  | 345 | 16  | 126 | 3.00E-28 | 103 |
| TcMYB6 | ATMYB71   | 45.63 | 103 | 54  | 2 | 16 | 318 | 20  | 121 | 3.00E-28 | 103 |
| TcMYB6 | ATMYB68   | 49.51 | 103 | 50  | 2 | 16 | 318 | 14  | 116 | 3.00E-28 | 105 |
| TcMYB6 | ATMYB84   | 48.54 | 103 | 51  | 2 | 16 | 318 | 14  | 116 | 3.00E-28 | 103 |
| TcMYB6 | ATMYB106  | 48.04 | 102 | 52  | 1 | 16 | 318 | 57  | 158 | 3.00E-28 | 105 |
| TcMYB6 | ATMYB3    | 37.68 | 138 | 85  | 3 | 4  | 414 | 18  | 152 | 4.00E-28 | 101 |
| TcMYB6 | ATMYB122  | 46.53 | 101 | 53  | 1 | 16 | 315 | 14  | 114 | 4.00E-28 | 103 |
| TcMYB6 | AtMYB89   | 44.44 | 99  | 55  | 0 | 19 | 315 | 57  | 155 | 5.00E-28 | 100 |
| TcMYB6 | ATMYB30   | 38.26 | 149 | 90  | 3 | 16 | 456 | 14  | 153 | 5.00E-28 | 103 |
| TcMYB6 | ATMYB28   | 40.56 | 143 | 82  | 3 | 16 | 435 | 14  | 156 | 7.00E-28 | 103 |
| TcMYB6 | AtMYB81   | 48.51 | 101 | 51  | 1 | 16 | 315 | 22  | 122 | 7.00E-28 | 104 |

|        |          |       |     |     |   |    |     |     |     |          |      |
|--------|----------|-------|-----|-----|---|----|-----|-----|-----|----------|------|
| TcMYB6 | ATMYB55  | 46.96 | 115 | 47  | 2 | 16 | 318 | 14  | 127 | 7.00E-28 | 103  |
| TcMYB6 | AtMYB10  | 41.13 | 124 | 66  | 3 | 16 | 366 | 16  | 138 | 8.00E-28 | 101  |
| TcMYB6 | AtMYB93  | 48.04 | 102 | 52  | 1 | 16 | 318 | 14  | 115 | 9.00E-28 | 103  |
| TcMYB6 | ATMYB96  | 33.16 | 187 | 120 | 4 | 16 | 561 | 14  | 184 | 1.00E-27 | 102  |
| TcMYB6 | ATMYB2   | 44.74 | 114 | 61  | 2 | 16 | 351 | 22  | 134 | 1.00E-27 | 101  |
| TcMYB6 | ATMYB66  | 38.85 | 139 | 78  | 4 | 16 | 411 | 18  | 154 | 2.00E-27 | 99.4 |
| TcMYB6 | AtMYB18  | 47.57 | 103 | 53  | 1 | 16 | 321 | 12  | 114 | 2.00E-27 | 101  |
| TcMYB6 | AtMYB6   | 47.06 | 102 | 53  | 1 | 16 | 318 | 14  | 115 | 2.00E-27 | 100  |
| TcMYB6 | ATMYB120 | 47.52 | 101 | 52  | 1 | 16 | 315 | 28  | 128 | 3.00E-27 | 103  |
| TcMYB6 | AtMYB40  | 35.9  | 156 | 98  | 4 | 16 | 477 | 14  | 159 | 3.00E-27 | 100  |
| TcMYB6 | ATMYB4   | 48.04 | 102 | 52  | 1 | 16 | 318 | 14  | 115 | 3.00E-27 | 100  |
| TcMYB6 | ATMYB94  | 36.81 | 144 | 83  | 3 | 16 | 423 | 14  | 153 | 4.00E-27 | 101  |
| TcMYB6 | AtMYB112 | 35.26 | 156 | 98  | 2 | 16 | 474 | 34  | 189 | 4.00E-27 | 99.4 |
| TcMYB6 | ATMYB38  | 47.57 | 103 | 52  | 2 | 16 | 318 | 14  | 116 | 5.00E-27 | 100  |
| TcMYB6 | AtMYB42  | 33.52 | 176 | 115 | 3 | 16 | 537 | 14  | 180 | 5.00E-27 | 100  |
| TcMYB6 | ATMYB123 | 46.6  | 103 | 53  | 2 | 16 | 318 | 16  | 117 | 6.00E-27 | 99.4 |
| TcMYB6 | AtMYB24  | 44.76 | 105 | 57  | 1 | 4  | 315 | 15  | 119 | 6.00E-27 | 98.2 |
| TcMYB6 | ATMYB31  | 43.4  | 106 | 55  | 2 | 16 | 318 | 14  | 115 | 7.00E-27 | 100  |
| TcMYB6 | MYB7     | 44.04 | 109 | 60  | 1 | 16 | 339 | 14  | 122 | 1.00E-26 | 99   |
| TcMYB6 | ATMYB57  | 40.71 | 113 | 66  | 1 | 16 | 351 | 27  | 139 | 1.00E-26 | 97.4 |
| TcMYB6 | ATMYB0   | 32.43 | 185 | 124 | 3 | 16 | 567 | 16  | 194 | 1.00E-26 | 97.8 |
| TcMYB6 | ATMYB23  | 45.63 | 103 | 54  | 2 | 16 | 318 | 14  | 115 | 1.00E-26 | 97.4 |
| TcMYB6 | ATMYB11  | 46.67 | 105 | 55  | 1 | 16 | 327 | 14  | 118 | 3.00E-26 | 99   |
| TcMYB6 | ATMYB5   | 36.97 | 165 | 88  | 5 | 16 | 462 | 25  | 183 | 3.00E-26 | 97.1 |
| TcMYB6 | AtMYB62  | 44.64 | 112 | 60  | 3 | 16 | 345 | 21  | 127 | 4.00E-26 | 97.8 |
| TcMYB6 | ATMYB111 | 36.59 | 164 | 102 | 3 | 16 | 501 | 14  | 172 | 4.00E-26 | 98.6 |
| TcMYB6 | AtMYB108 | 37.68 | 138 | 82  | 3 | 16 | 417 | 21  | 157 | 6.00E-26 | 97.8 |
| TcMYB6 | AtMYB76  | 44.04 | 109 | 60  | 1 | 16 | 339 | 14  | 122 | 8.00E-26 | 97.8 |
| TcMYB6 | AtMYB114 | 41.75 | 103 | 59  | 1 | 16 | 321 | 10  | 112 | 1.00E-25 | 92.8 |
| TcMYB6 | ATMYB29  | 46.53 | 101 | 53  | 1 | 16 | 315 | 14  | 114 | 1.00E-25 | 97.1 |
| TcMYB6 | AtMYB20  | 44.66 | 103 | 55  | 2 | 16 | 318 | 14  | 115 | 2.00E-25 | 95.5 |
| TcMYB6 | ATMYB90  | 33.16 | 187 | 119 | 5 | 16 | 558 | 10  | 193 | 2.00E-25 | 94.7 |
| TcMYB6 | AtMYB104 | 44.86 | 107 | 57  | 3 | 16 | 330 | 18  | 122 | 3.00E-25 | 96.7 |
| TcMYB6 | AtMYB85  | 44.66 | 103 | 55  | 2 | 16 | 318 | 14  | 115 | 5.00E-25 | 94.4 |
| TcMYB6 | AtMYB22  | 30.32 | 188 | 129 | 4 | 16 | 573 | 54  | 231 | 5.00E-25 | 94   |
| TcMYB6 | AtMYB43  | 31.09 | 193 | 131 | 4 | 16 | 588 | 14  | 195 | 2.00E-24 | 94   |
| TcMYB6 | ATMYB12  | 44.12 | 102 | 56  | 1 | 16 | 318 | 14  | 115 | 2.00E-24 | 94.4 |
| TcMYB6 | ATMYB75  | 41.12 | 107 | 58  | 2 | 16 | 321 | 10  | 112 | 5.00E-24 | 91.3 |
| TcMYB6 | AtMYB113 | 40.19 | 107 | 59  | 2 | 16 | 321 | 10  | 112 | 9.00E-24 | 90.5 |
| TcMYB6 | ATMYB88  | 31.82 | 176 | 111 | 3 | 25 | 525 | 33  | 205 | 5.00E-23 | 91.3 |
| TcMYB6 | ATMYB88  | 32.08 | 53  | 36  | 1 | 16 | 174 | 82  | 133 | 5.00E-04 | 33.5 |
| TcMYB6 | AtMYB124 | 31.3  | 131 | 90  | 0 | 25 | 417 | 28  | 158 | 1.00E-22 | 90.1 |
| TcMYB6 | AtMYB124 | 32.08 | 53  | 36  | 1 | 16 | 174 | 77  | 128 | 5.00E-04 | 33.5 |
| TcMYB6 | ATMYB78  | 28.78 | 205 | 120 | 4 | 16 | 552 | 28  | 232 | 2.00E-22 | 88.2 |
| TcMYB6 | ATMYB99  | 41.59 | 113 | 54  | 4 | 16 | 318 | 15  | 123 | 1.00E-21 | 84.7 |
| TcMYB6 | ATMYB91  | 32.71 | 107 | 69  | 1 | 25 | 336 | 7   | 113 | 4.00E-16 | 70.5 |
| TcMYB7 | ATMYB105 | 87.65 | 81  | 10  | 0 | 64 | 306 | 139 | 219 | 4.00E-49 | 155  |
| TcMYB7 | AtMYB117 | 86.42 | 81  | 11  | 0 | 64 | 306 | 130 | 210 | 8.00E-49 | 155  |
| TcMYB7 | AtMYB56  | 60    | 115 | 46  | 0 | 40 | 384 | 117 | 231 | 1.00E-44 | 143  |
| TcMYB7 | ATMYB54  | 62.39 | 109 | 41  | 1 | 64 | 390 | 38  | 144 | 9.00E-44 | 139  |
| TcMYB7 | ATMYB52  | 75.95 | 79  | 19  | 0 | 64 | 300 | 37  | 115 | 6.00E-43 | 137  |
| TcMYB7 | ATMYB110 | 75    | 80  | 20  | 0 | 64 | 303 | 99  | 178 | 7.00E-42 | 135  |
| TcMYB7 | ATMYB69  | 76.39 | 72  | 17  | 0 | 64 | 279 | 51  | 122 | 3.00E-38 | 125  |
| TcMYB7 | AtMYB89  | 68.12 | 69  | 22  | 0 | 79 | 285 | 93  | 161 | 9.00E-32 | 106  |
| TcMYB7 | AtMYB109 | 56    | 75  | 33  | 0 | 64 | 288 | 88  | 162 | 1.00E-28 | 102  |
| TcMYB7 | ATMYB25  | 57.53 | 73  | 31  | 0 | 64 | 282 | 82  | 154 | 7.00E-28 | 100  |
| TcMYB7 | ATMYB66  | 33.77 | 151 | 86  | 4 | 73 | 483 | 54  | 203 | 9.00E-28 | 96.7 |
| TcMYB7 | AtMYB1   | 57.14 | 70  | 30  | 0 | 64 | 273 | 87  | 156 | 3.00E-27 | 99   |
| TcMYB7 | AtMYB1   | 32.31 | 65  | 43  | 2 | 58 | 249 | 42  | 97  | 2.00E-04 | 33.1 |
| TcMYB7 | ATMYB44  | 59.42 | 69  | 28  | 0 | 64 | 270 | 38  | 106 | 9.00E-27 | 96.3 |
| TcMYB7 | AtMYB70  | 59.42 | 69  | 28  | 0 | 64 | 270 | 45  | 113 | 9.00E-27 | 96.3 |
| TcMYB7 | ATMYB77  | 57.97 | 69  | 29  | 0 | 64 | 270 | 38  | 106 | 6.00E-26 | 94   |
| TcMYB7 | ATMYB73  | 55.07 | 69  | 31  | 0 | 64 | 270 | 45  | 113 | 1.00E-25 | 93.6 |
| TcMYB7 | ATMYB23  | 54.55 | 66  | 30  | 0 | 73 | 270 | 50  | 115 | 1.00E-25 | 91.3 |
| TcMYB7 | ATMYB0   | 54.55 | 66  | 30  | 0 | 73 | 270 | 52  | 117 | 2.00E-25 | 91.3 |
| TcMYB7 | ATMYB15  | 37.06 | 143 | 74  | 4 | 73 | 453 | 50  | 187 | 2.00E-24 | 89.7 |
| TcMYB7 | AtMYB27  | 49.35 | 77  | 39  | 1 | 70 | 300 | 46  | 120 | 1.00E-23 | 86.7 |
| TcMYB7 | ATMYB13  | 40.87 | 115 | 60  | 3 | 73 | 393 | 50  | 164 | 1.00E-23 | 86.7 |
| TcMYB7 | AtMYB10  | 52.11 | 71  | 34  | 0 | 73 | 285 | 52  | 122 | 2.00E-23 | 86.3 |
| TcMYB7 | AtMYB19  | 52.24 | 67  | 32  | 0 | 73 | 273 | 50  | 116 | 2.00E-23 | 86.7 |
| TcMYB7 | ATMYB58  | 38    | 100 | 62  | 0 | 73 | 372 | 52  | 151 | 2.00E-23 | 86.7 |
| TcMYB7 | AtMYB103 | 45.56 | 90  | 49  | 0 | 43 | 312 | 40  | 129 | 3.00E-23 | 87.8 |
| TcMYB7 | AtMYB32  | 42.55 | 94  | 54  | 0 | 73 | 354 | 50  | 143 | 4.00E-23 | 85.9 |
| TcMYB7 | AtMYB104 | 45.45 | 88  | 48  | 0 | 79 | 342 | 56  | 143 | 5.00E-23 | 87   |
| TcMYB7 | ATMYB5   | 51.43 | 70  | 34  | 0 | 73 | 282 | 61  | 130 | 6.00E-23 | 85.1 |
| TcMYB7 | ATMYB3   | 54.55 | 66  | 30  | 0 | 73 | 270 | 50  | 115 | 7.00E-23 | 85.1 |
| TcMYB7 | ATMYB67  | 54.29 | 70  | 32  | 0 | 73 | 282 | 60  | 129 | 1.00E-22 | 85.5 |
| TcMYB7 | ATMYB4   | 54.55 | 66  | 30  | 0 | 73 | 270 | 50  | 115 | 1.00E-22 | 85.1 |
| TcMYB7 | AtMYB45  | 34.13 | 126 | 74  | 2 | 73 | 423 | 56  | 181 | 1.00E-22 | 84.7 |
| TcMYB7 | ATMYB63  | 50.7  | 71  | 35  | 0 | 73 | 285 | 52  | 122 | 1.00E-22 | 85.1 |

|        |           |       |     |    |   |     |     |     |     |          |      |
|--------|-----------|-------|-----|----|---|-----|-----|-----|-----|----------|------|
| TcMYB7 | AtMYB18   | 38.14 | 97  | 60 | 0 | 73  | 363 | 48  | 144 | 3.00E-22 | 84   |
| TcMYB7 | AtMYB51   | 54.55 | 66  | 30 | 0 | 73  | 270 | 51  | 116 | 3.00E-22 | 84.7 |
| TcMYB7 | MYB8      | 53.03 | 66  | 31 | 0 | 73  | 270 | 50  | 115 | 3.00E-22 | 82.4 |
| TcMYB7 | AtMYB40   | 51.47 | 68  | 33 | 0 | 73  | 276 | 50  | 117 | 4.00E-22 | 83.2 |
| TcMYB7 | ATMYB121  | 41.35 | 104 | 56 | 1 | 61  | 357 | 61  | 164 | 5.00E-22 | 83.2 |
| TcMYB7 | ATMYB95   | 51.52 | 66  | 32 | 0 | 73  | 270 | 50  | 115 | 6.00E-22 | 82.8 |
| TcMYB7 | AtMYB114  | 51.52 | 66  | 32 | 0 | 76  | 273 | 47  | 112 | 7.00E-22 | 79.7 |
| TcMYB7 | AtMYB9    | 54.29 | 70  | 32 | 0 | 61  | 270 | 46  | 115 | 7.00E-22 | 83.6 |
| TcMYB7 | MYB7      | 51.52 | 66  | 32 | 0 | 73  | 270 | 50  | 115 | 8.00E-22 | 82.4 |
| TcMYB7 | ATMYB119  | 50.57 | 87  | 38 | 2 | 43  | 288 | 131 | 216 | 9.00E-22 | 84   |
| TcMYB7 | ATMYB119  | 36.59 | 41  | 25 | 1 | 133 | 252 | 108 | 148 | 3.00E-04 | 33.1 |
| TcMYB7 | ATMYB59-3 | 39.29 | 112 | 68 | 1 | 61  | 396 | 42  | 152 | 9.00E-22 | 81.6 |
| TcMYB7 | AtMYB6    | 51.52 | 66  | 32 | 0 | 73  | 270 | 50  | 115 | 9.00E-22 | 81.6 |
| TcMYB7 | AtMYB81   | 50    | 78  | 39 | 0 | 61  | 294 | 54  | 131 | 1.00E-21 | 83.6 |
| TcMYB7 | ATMYB122  | 56.67 | 60  | 26 | 0 | 73  | 252 | 50  | 109 | 1.00E-21 | 82.8 |
| TcMYB7 | ATMYB48   | 46.25 | 80  | 43 | 0 | 43  | 282 | 35  | 114 | 1.00E-21 | 81.6 |
| TcMYB7 | AtMYB97   | 36.75 | 117 | 74 | 1 | 40  | 390 | 46  | 159 | 1.00E-21 | 83.2 |
| TcMYB7 | AtMYB82   | 46.75 | 77  | 41 | 0 | 40  | 270 | 39  | 115 | 2.00E-21 | 80.1 |
| TcMYB7 | AtMYB53   | 52.86 | 70  | 33 | 0 | 61  | 270 | 46  | 115 | 2.00E-21 | 82   |
| TcMYB7 | ATMYB90   | 39.29 | 112 | 65 | 1 | 76  | 402 | 47  | 158 | 2.00E-21 | 80.9 |
| TcMYB7 | ATMYB55   | 35.71 | 126 | 62 | 3 | 73  | 393 | 62  | 185 | 3.00E-21 | 82   |
| TcMYB7 | ATMYB35   | 40    | 100 | 60 | 1 | 61  | 360 | 46  | 143 | 4.00E-21 | 81.3 |
| TcMYB7 | AtMYB107  | 52.86 | 70  | 33 | 0 | 61  | 270 | 46  | 115 | 6.00E-21 | 80.9 |
| TcMYB7 | AtMYB64   | 44.55 | 110 | 61 | 2 | 43  | 372 | 131 | 227 | 6.00E-21 | 81.6 |
| TcMYB7 | ATMYB14   | 46.15 | 78  | 42 | 0 | 73  | 306 | 50  | 127 | 6.00E-21 | 79.7 |
| TcMYB7 | AtMYB83   | 45.83 | 72  | 39 | 0 | 73  | 288 | 68  | 139 | 7.00E-21 | 80.9 |
| TcMYB7 | ATMYB46   | 39.76 | 83  | 50 | 0 | 40  | 288 | 45  | 127 | 7.00E-21 | 80.1 |
| TcMYB7 | AtMYB41   | 51.52 | 66  | 32 | 0 | 73  | 270 | 50  | 115 | 7.00E-21 | 80.1 |
| TcMYB7 | AtMYB79   | 39.39 | 99  | 60 | 0 | 40  | 336 | 33  | 131 | 7.00E-21 | 79.7 |
| TcMYB7 | AtMYB49   | 53.03 | 66  | 31 | 0 | 73  | 270 | 50  | 115 | 8.00E-21 | 80.5 |
| TcMYB7 | ATMYB34   | 48.57 | 70  | 36 | 0 | 73  | 282 | 50  | 119 | 8.00E-21 | 80.1 |
| TcMYB7 | ATMYB28   | 50    | 70  | 35 | 0 | 73  | 282 | 50  | 119 | 1.00E-20 | 80.5 |
| TcMYB7 | ATMYB71   | 41.86 | 86  | 50 | 0 | 73  | 330 | 56  | 141 | 1.00E-20 | 79.3 |
| TcMYB7 | ATMYB123  | 39.45 | 109 | 66 | 3 | 73  | 399 | 52  | 141 | 1.00E-20 | 79   |
| TcMYB7 | AtMYB98   | 43.02 | 86  | 49 | 0 | 64  | 321 | 249 | 334 | 1.00E-20 | 80.5 |
| TcMYB7 | AtMYB98   | 36.59 | 41  | 25 | 1 | 133 | 252 | 220 | 260 | 3.00E-04 | 32.7 |
| TcMYB7 | ATMYB118  | 47.3  | 74  | 39 | 0 | 64  | 285 | 221 | 294 | 1.00E-20 | 80.5 |
| TcMYB7 | ATMYB118  | 20.87 | 115 | 67 | 4 | 133 | 405 | 192 | 306 | 5.00E-04 | 32.3 |
| TcMYB7 | ATMYB61   | 37.96 | 108 | 66 | 2 | 73  | 393 | 50  | 151 | 1.00E-20 | 80.1 |
| TcMYB7 | AtMYB43   | 42.05 | 88  | 51 | 0 | 73  | 336 | 50  | 137 | 2.00E-20 | 79.7 |
| TcMYB7 | ATMYB75   | 51.52 | 66  | 32 | 0 | 76  | 273 | 47  | 112 | 2.00E-20 | 78.6 |
| TcMYB7 | AtMYB17   | 51.52 | 66  | 32 | 0 | 73  | 270 | 50  | 115 | 2.00E-20 | 79.3 |
| TcMYB7 | ATMYB65   | 44.87 | 78  | 43 | 0 | 61  | 294 | 75  | 152 | 2.00E-20 | 80.5 |
| TcMYB7 | AtMYB100  | 45.71 | 70  | 38 | 0 | 58  | 267 | 56  | 125 | 2.00E-20 | 78.2 |
| TcMYB7 | ATMYB72   | 45.83 | 72  | 39 | 0 | 73  | 288 | 52  | 123 | 2.00E-20 | 79   |
| TcMYB7 | ATMYB101  | 44.58 | 83  | 46 | 1 | 73  | 321 | 56  | 134 | 2.00E-20 | 80.1 |
| TcMYB7 | ATMYB33   | 38.54 | 96  | 59 | 0 | 73  | 360 | 70  | 165 | 2.00E-20 | 80.1 |
| TcMYB7 | AtMYB115  | 46.48 | 71  | 38 | 0 | 55  | 267 | 187 | 257 | 3.00E-20 | 79.3 |
| TcMYB7 | AtMYB47   | 46.97 | 66  | 35 | 0 | 73  | 270 | 50  | 115 | 3.00E-20 | 78.2 |
| TcMYB7 | ATMYB86   | 45.71 | 70  | 38 | 0 | 73  | 282 | 50  | 119 | 5.00E-20 | 78.6 |
| TcMYB7 | AtMYB74   | 50    | 66  | 33 | 0 | 73  | 270 | 51  | 116 | 5.00E-20 | 78.2 |
| TcMYB7 | AtMYB36   | 38.26 | 115 | 71 | 3 | 37  | 381 | 39  | 142 | 6.00E-20 | 78.2 |
| TcMYB7 | AtMYB113  | 47.83 | 69  | 36 | 0 | 76  | 282 | 47  | 115 | 6.00E-20 | 77   |
| TcMYB7 | ATMYB92   | 50    | 70  | 35 | 0 | 61  | 270 | 46  | 115 | 6.00E-20 | 78.2 |
| TcMYB7 | AtMYB116  | 41.86 | 86  | 50 | 0 | 70  | 327 | 55  | 140 | 7.00E-20 | 77.4 |
| TcMYB7 | ATMYB120  | 44.87 | 78  | 43 | 0 | 61  | 294 | 60  | 137 | 8.00E-20 | 78.6 |
| TcMYB7 | ATMYB3    | 42.86 | 84  | 48 | 1 | 40  | 291 | 47  | 129 | 8.00E-20 | 76.3 |
| TcMYB7 | ATMYB2    | 48.57 | 70  | 36 | 0 | 40  | 249 | 47  | 116 | 8.00E-20 | 77   |
| TcMYB7 | ATMYB57   | 29.2  | 137 | 97 | 2 | 73  | 483 | 63  | 188 | 1.00E-19 | 75.5 |
| TcMYB7 | AtMYB76   | 48.05 | 77  | 40 | 0 | 40  | 270 | 39  | 115 | 1.00E-19 | 77.4 |
| TcMYB7 | ATMYB111  | 40.38 | 104 | 62 | 1 | 73  | 384 | 50  | 151 | 1.00E-19 | 77.4 |
| TcMYB7 | ATMYB102  | 51.52 | 66  | 32 | 0 | 73  | 270 | 50  | 115 | 1.00E-19 | 77.4 |
| TcMYB7 | AtMYB62   | 34.78 | 115 | 65 | 2 | 73  | 387 | 57  | 171 | 2.00E-19 | 76.3 |
| TcMYB7 | ATMYB30   | 38.39 | 112 | 69 | 2 | 46  | 381 | 42  | 146 | 2.00E-19 | 76.6 |
| TcMYB7 | ATMYB68   | 34.75 | 118 | 74 | 2 | 37  | 381 | 39  | 152 | 2.00E-19 | 77   |
| TcMYB7 | ATMYB99   | 51.52 | 66  | 32 | 0 | 73  | 270 | 58  | 123 | 3.00E-19 | 75.1 |
| TcMYB7 | AtMYB93   | 50    | 70  | 35 | 0 | 61  | 270 | 46  | 115 | 4.00E-19 | 76.3 |
| TcMYB7 | AtMYB42   | 48.48 | 66  | 34 | 0 | 73  | 270 | 50  | 115 | 4.00E-19 | 75.5 |
| TcMYB7 | ATMYB94   | 47.89 | 71  | 37 | 0 | 76  | 288 | 51  | 121 | 4.00E-19 | 75.9 |
| TcMYB7 | AtMYB50   | 46.97 | 66  | 35 | 0 | 73  | 270 | 50  | 115 | 5.00E-19 | 75.5 |
| TcMYB7 | ATMYB80   | 48.48 | 66  | 34 | 0 | 73  | 270 | 50  | 115 | 5.00E-19 | 75.5 |
| TcMYB7 | ATMYB84   | 41.03 | 78  | 46 | 0 | 37  | 270 | 39  | 116 | 6.00E-19 | 75.1 |
| TcMYB7 | ATMYB106  | 44.16 | 77  | 43 | 0 | 40  | 270 | 82  | 158 | 7.00E-19 | 75.5 |
| TcMYB7 | AtMYB85   | 48.48 | 66  | 34 | 0 | 73  | 270 | 50  | 115 | 8.00E-19 | 74.3 |
| TcMYB7 | ATMYB29   | 55    | 60  | 27 | 0 | 73  | 252 | 50  | 109 | 8.00E-19 | 75.1 |
| TcMYB7 | ATMYB11   | 39    | 100 | 49 | 1 | 73  | 336 | 50  | 149 | 8.00E-19 | 75.1 |
| TcMYB7 | AtMYB60   | 38.94 | 113 | 60 | 3 | 46  | 357 | 42  | 153 | 9.00E-19 | 74.3 |
| TcMYB7 | AtMYB20   | 46.38 | 69  | 37 | 0 | 73  | 279 | 50  | 118 | 9.00E-19 | 74.3 |
| TcMYB7 | ATMYB26   | 48.48 | 66  | 34 | 0 | 73  | 270 | 59  | 124 | 9.00E-19 | 75.1 |
| TcMYB7 | ATMYB96   | 41.24 | 97  | 55 | 1 | 76  | 360 | 51  | 147 | 1.00E-18 | 74.7 |

|        |          |       |     |     |   |     |      |     |     |          |      |
|--------|----------|-------|-----|-----|---|-----|------|-----|-----|----------|------|
| TcMYB7 | ATMYB12  | 48.48 | 66  | 34  | 0 | 73  | 270  | 50  | 115 | 1.00E-18 | 74.7 |
| TcMYB7 | AtMYB24  | 44.29 | 70  | 39  | 0 | 40  | 249  | 44  | 113 | 1.00E-18 | 72.8 |
| TcMYB7 | AtMYB108 | 47.14 | 70  | 37  | 0 | 40  | 249  | 46  | 115 | 2.00E-18 | 73.9 |
| TcMYB7 | AtMYB112 | 45.71 | 70  | 38  | 0 | 40  | 249  | 59  | 128 | 2.00E-18 | 72.8 |
| TcMYB7 | ATMYB87  | 37.04 | 81  | 51  | 0 | 28  | 270  | 36  | 116 | 2.00E-18 | 73.6 |
| TcMYB7 | ATMYB16  | 42.86 | 77  | 44  | 0 | 40  | 270  | 39  | 115 | 4.00E-18 | 73.2 |
| TcMYB7 | ATMYB37  | 43.06 | 72  | 41  | 0 | 73  | 288  | 51  | 122 | 5.00E-18 | 72.8 |
| TcMYB7 | ATMYB31  | 46.67 | 75  | 40  | 1 | 46  | 270  | 42  | 115 | 5.00E-18 | 72.8 |
| TcMYB7 | ATMYB38  | 45.45 | 66  | 36  | 0 | 73  | 270  | 51  | 116 | 2.00E-17 | 70.9 |
| TcMYB7 | AtMYB22  | 35.8  | 81  | 52  | 0 | 58  | 300  | 83  | 163 | 2.00E-16 | 67.4 |
| TcMYB7 | AtMYB22  | 33.33 | 45  | 30  | 0 | 118 | 252  | 52  | 96  | 4.00E-05 | 35.4 |
| TcMYB7 | ATMYB78  | 42.47 | 73  | 28  | 1 | 73  | 249  | 64  | 136 | 7.00E-15 | 63.9 |
| TcMYB7 | ATMYB88  | 35.71 | 70  | 45  | 0 | 76  | 285  | 66  | 135 | 1.00E-13 | 60.5 |
| TcMYB7 | AtMYB124 | 34.29 | 70  | 46  | 0 | 76  | 285  | 61  | 130 | 6.00E-13 | 58.5 |
| TcMYB7 | ATMYB91  | 37.18 | 78  | 49  | 0 | 76  | 309  | 43  | 120 | 1.00E-12 | 57.8 |
| TcMYB8 | AtMYB98  | 49.64 | 139 | 69  | 1 | 457 | 870  | 181 | 319 | 1.00E-45 | 162  |
| TcMYB8 | AtMYB98  | 37.89 | 95  | 59  | 1 | 406 | 690  | 217 | 310 | 4.00E-18 | 80.1 |
| TcMYB8 | ATMYB119 | 59.09 | 110 | 45  | 0 | 535 | 864  | 96  | 205 | 2.00E-42 | 153  |
| TcMYB8 | ATMYB119 | 33.68 | 95  | 63  | 1 | 406 | 690  | 105 | 198 | 7.00E-15 | 70.1 |
| TcMYB8 | ATMYB119 | 35.29 | 51  | 32  | 1 | 718 | 867  | 105 | 155 | 2.00E-04 | 36.6 |
| TcMYB8 | ATMYB118 | 59.62 | 104 | 42  | 0 | 553 | 864  | 186 | 289 | 3.00E-41 | 150  |
| TcMYB8 | ATMYB118 | 34.74 | 95  | 62  | 1 | 406 | 690  | 189 | 282 | 1.00E-15 | 72.8 |
| TcMYB8 | ATMYB118 | 33.96 | 53  | 34  | 1 | 712 | 867  | 187 | 239 | 3.00E-05 | 39.3 |
| TcMYB8 | AtMYB64  | 55.08 | 118 | 53  | 0 | 511 | 864  | 88  | 205 | 3.00E-41 | 149  |
| TcMYB8 | AtMYB64  | 30.53 | 95  | 66  | 1 | 406 | 690  | 105 | 198 | 6.00E-13 | 63.9 |
| TcMYB8 | AtMYB64  | 24.53 | 106 | 79  | 2 | 553 | 867  | 63  | 155 | 5.00E-04 | 35.4 |
| TcMYB8 | ATMYB73  | 58.49 | 106 | 44  | 0 | 547 | 864  | 8   | 113 | 4.00E-38 | 137  |
| TcMYB8 | ATMYB73  | 33.68 | 95  | 63  | 1 | 406 | 690  | 13  | 106 | 3.00E-15 | 70.1 |
| TcMYB8 | AtMYB1   | 53.77 | 106 | 49  | 0 | 559 | 876  | 54  | 159 | 1.00E-37 | 138  |
| TcMYB8 | AtMYB1   | 34.91 | 106 | 69  | 1 | 373 | 690  | 44  | 148 | 3.00E-17 | 77   |
| TcMYB8 | AtMYB115 | 54    | 100 | 46  | 0 | 562 | 861  | 158 | 257 | 5.00E-36 | 132  |
| TcMYB8 | AtMYB115 | 41.05 | 95  | 56  | 1 | 406 | 690  | 158 | 251 | 4.00E-18 | 79.3 |
| TcMYB8 | ATMYB44  | 53.77 | 106 | 49  | 0 | 559 | 876  | 5   | 110 | 5.00E-36 | 131  |
| TcMYB8 | ATMYB44  | 35.79 | 95  | 61  | 1 | 406 | 690  | 6   | 99  | 7.00E-15 | 68.9 |
| TcMYB8 | ATMYB77  | 48.72 | 117 | 60  | 0 | 559 | 909  | 5   | 121 | 8.00E-36 | 130  |
| TcMYB8 | ATMYB77  | 36.84 | 95  | 60  | 1 | 406 | 690  | 6   | 99  | 1.00E-16 | 73.9 |
| TcMYB8 | AtMYB70  | 56.86 | 102 | 44  | 0 | 559 | 864  | 12  | 113 | 1.00E-35 | 130  |
| TcMYB8 | AtMYB70  | 30.36 | 112 | 78  | 1 | 406 | 741  | 13  | 123 | 4.00E-14 | 66.6 |
| TcMYB8 | AtMYB109 | 53.64 | 110 | 51  | 0 | 559 | 888  | 55  | 164 | 5.00E-35 | 130  |
| TcMYB8 | AtMYB109 | 29.63 | 162 | 112 | 4 | 271 | 750  | 14  | 168 | 3.00E-15 | 70.9 |
| TcMYB8 | ATMYB105 | 50.93 | 108 | 53  | 0 | 562 | 885  | 107 | 214 | 1.00E-33 | 125  |
| TcMYB8 | ATMYB105 | 30.21 | 96  | 67  | 1 | 403 | 690  | 106 | 200 | 9.00E-14 | 65.9 |
| TcMYB8 | ATMYB105 | 29.51 | 122 | 64  | 4 | 247 | 546  | 91  | 204 | 2.00E-05 | 40   |
| TcMYB8 | AtMYB100 | 53.61 | 97  | 45  | 0 | 571 | 861  | 29  | 125 | 1.00E-33 | 122  |
| TcMYB8 | AtMYB100 | 35.79 | 95  | 61  | 1 | 406 | 690  | 26  | 119 | 5.00E-15 | 68.2 |
| TcMYB8 | AtMYB100 | 30.91 | 55  | 36  | 2 | 709 | 867  | 23  | 76  | 8.00E-04 | 34.3 |
| TcMYB8 | ATMYB69  | 49.52 | 105 | 53  | 0 | 550 | 864  | 15  | 119 | 2.00E-33 | 122  |
| TcMYB8 | ATMYB69  | 36.05 | 86  | 55  | 1 | 406 | 663  | 19  | 103 | 4.00E-15 | 68.6 |
| TcMYB8 | AtMYB56  | 53.47 | 101 | 47  | 0 | 562 | 864  | 93  | 193 | 2.00E-33 | 124  |
| TcMYB8 | AtMYB56  | 28.7  | 108 | 77  | 1 | 367 | 690  | 80  | 186 | 6.00E-13 | 63.2 |
| TcMYB8 | ATMYB54  | 49.5  | 101 | 51  | 0 | 562 | 864  | 6   | 106 | 4.00E-33 | 120  |
| TcMYB8 | ATMYB54  | 32.29 | 96  | 65  | 1 | 403 | 690  | 5   | 99  | 3.00E-15 | 68.9 |
| TcMYB8 | ATMYB54  | 26.42 | 106 | 78  | 2 | 229 | 546  | 18  | 103 | 3.00E-04 | 35.8 |
| TcMYB8 | ATMYB110 | 50.93 | 108 | 53  | 0 | 562 | 885  | 67  | 174 | 6.00E-33 | 122  |
| TcMYB8 | ATMYB110 | 29.17 | 96  | 68  | 1 | 403 | 690  | 66  | 160 | 7.00E-12 | 59.7 |
| TcMYB8 | ATMYB25  | 49.15 | 118 | 60  | 0 | 559 | 912  | 49  | 166 | 6.00E-33 | 124  |
| TcMYB8 | ATMYB25  | 32.43 | 111 | 75  | 1 | 370 | 702  | 38  | 147 | 1.00E-14 | 68.9 |
| TcMYB8 | AtMYB117 | 53.47 | 101 | 47  | 0 | 562 | 864  | 98  | 198 | 7.00E-33 | 123  |
| TcMYB8 | AtMYB117 | 25.48 | 157 | 117 | 2 | 220 | 690  | 46  | 191 | 6.00E-15 | 69.7 |
| TcMYB8 | AtMYB117 | 40    | 50  | 30  | 1 | 397 | 546  | 147 | 195 | 3.00E-05 | 39.3 |
| TcMYB8 | ATMYB52  | 48.51 | 101 | 52  | 0 | 562 | 864  | 5   | 105 | 7.00E-33 | 120  |
| TcMYB8 | ATMYB52  | 33.33 | 96  | 64  | 1 | 403 | 690  | 4   | 98  | 1.00E-15 | 70.5 |
| TcMYB8 | ATMYB52  | 25.47 | 106 | 79  | 2 | 229 | 546  | 17  | 102 | 2.00E-04 | 36.6 |
| TcMYB8 | AtMYB49  | 30.1  | 289 | 184 | 8 | 562 | 1374 | 14  | 291 | 1.00E-31 | 119  |
| TcMYB8 | AtMYB49  | 29.81 | 104 | 72  | 2 | 406 | 714  | 14  | 116 | 5.00E-12 | 60.5 |
| TcMYB8 | AtMYB89  | 48.62 | 109 | 56  | 0 | 565 | 891  | 57  | 165 | 2.00E-31 | 114  |
| TcMYB8 | AtMYB89  | 28.89 | 135 | 96  | 2 | 409 | 813  | 57  | 182 | 3.00E-14 | 64.7 |
| TcMYB8 | AtMYB89  | 32.56 | 86  | 58  | 3 | 403 | 660  | 107 | 182 | 8.00E-06 | 40   |
| TcMYB8 | ATMYB63  | 48.08 | 104 | 53  | 1 | 562 | 870  | 16  | 119 | 5.00E-30 | 113  |
| TcMYB8 | ATMYB63  | 31.86 | 113 | 76  | 2 | 406 | 741  | 16  | 127 | 3.00E-14 | 67   |
| TcMYB8 | ATMYB95  | 38.62 | 145 | 88  | 1 | 556 | 987  | 12  | 156 | 7.00E-30 | 112  |
| TcMYB8 | ATMYB65  | 49.04 | 104 | 52  | 1 | 556 | 864  | 41  | 144 | 2.00E-29 | 116  |
| TcMYB8 | ATMYB65  | 31.82 | 132 | 76  | 4 | 385 | 738  | 36  | 166 | 6.00E-13 | 64.3 |
| TcMYB8 | AtMYB53  | 47.62 | 105 | 54  | 1 | 556 | 867  | 12  | 116 | 2.00E-29 | 112  |
| TcMYB8 | AtMYB53  | 29.81 | 104 | 72  | 2 | 406 | 714  | 14  | 116 | 8.00E-12 | 59.7 |
| TcMYB8 | ATMYB92  | 48.57 | 105 | 53  | 1 | 556 | 867  | 12  | 116 | 2.00E-29 | 112  |
| TcMYB8 | ATMYB92  | 31.73 | 104 | 70  | 2 | 406 | 714  | 14  | 116 | 1.00E-12 | 62.4 |
| TcMYB8 | AtMYB9   | 47.62 | 105 | 54  | 1 | 556 | 867  | 12  | 116 | 2.00E-29 | 112  |
| TcMYB8 | AtMYB9   | 33.65 | 104 | 68  | 2 | 406 | 714  | 14  | 116 | 9.00E-14 | 65.9 |
| TcMYB8 | ATMYB58  | 46.67 | 105 | 55  | 1 | 562 | 873  | 16  | 120 | 5.00E-29 | 110  |

|        |           |       |     |     |    |     |      |    |     |          |      |
|--------|-----------|-------|-----|-----|----|-----|------|----|-----|----------|------|
| TcMYB8 | ATMYB58   | 28.97 | 107 | 75  | 2  | 406 | 723  | 16 | 121 | 1.00E-11 | 58.5 |
| TcMYB8 | ATMYB26   | 35.11 | 188 | 100 | 3  | 562 | 1059 | 14 | 201 | 6.00E-29 | 112  |
| TcMYB8 | ATMYB26   | 27.73 | 119 | 76  | 3  | 406 | 732  | 14 | 127 | 7.00E-09 | 50.8 |
| TcMYB8 | ATMYB35   | 47.17 | 106 | 55  | 1  | 553 | 867  | 11 | 116 | 6.00E-29 | 110  |
| TcMYB8 | ATMYB35   | 31.13 | 106 | 72  | 2  | 406 | 720  | 14 | 118 | 8.00E-11 | 56.6 |
| TcMYB8 | ATMYB67   | 45.28 | 106 | 56  | 2  | 562 | 873  | 24 | 128 | 7.00E-29 | 110  |
| TcMYB8 | ATMYB67   | 30.63 | 111 | 76  | 3  | 406 | 735  | 24 | 129 | 1.00E-10 | 56.2 |
| TcMYB8 | AtMYB27   | 44.76 | 105 | 56  | 2  | 556 | 864  | 9  | 112 | 1.00E-28 | 108  |
| TcMYB8 | AtMYB27   | 34.34 | 99  | 64  | 2  | 406 | 699  | 11 | 108 | 6.00E-14 | 65.1 |
| TcMYB8 | AtMYB22   | 45.63 | 103 | 56  | 1  | 553 | 861  | 51 | 152 | 1.00E-28 | 108  |
| TcMYB8 | AtMYB22   | 37.5  | 96  | 60  | 2  | 403 | 690  | 53 | 146 | 1.00E-15 | 70.5 |
| TcMYB8 | AtMYB22   | 28.3  | 53  | 38  | 0  | 709 | 867  | 51 | 103 | 7.00E-06 | 40.8 |
| TcMYB8 | AtMYB45   | 35.91 | 181 | 113 | 3  | 562 | 1095 | 20 | 193 | 1.00E-28 | 108  |
| TcMYB8 | AtMYB45   | 36.89 | 103 | 64  | 2  | 397 | 702  | 17 | 118 | 2.00E-13 | 63.5 |
| TcMYB8 | AtMYB107  | 46.67 | 105 | 55  | 1  | 556 | 867  | 12 | 116 | 2.00E-28 | 109  |
| TcMYB8 | AtMYB107  | 31.73 | 104 | 70  | 2  | 406 | 714  | 14 | 116 | 6.00E-13 | 63.2 |
| TcMYB8 | ATMYB72   | 42.98 | 114 | 63  | 2  | 562 | 897  | 16 | 128 | 2.00E-28 | 108  |
| TcMYB8 | ATMYB72   | 28.44 | 109 | 77  | 2  | 391 | 714  | 11 | 118 | 3.00E-12 | 60.8 |
| TcMYB8 | AtMYB93   | 41.41 | 128 | 66  | 2  | 556 | 912  | 12 | 139 | 2.00E-28 | 110  |
| TcMYB8 | AtMYB93   | 29.81 | 104 | 72  | 2  | 406 | 714  | 14 | 116 | 6.00E-11 | 57.4 |
| TcMYB8 | ATMYB102  | 48.57 | 105 | 53  | 1  | 556 | 867  | 12 | 116 | 2.00E-28 | 110  |
| TcMYB8 | ATMYB102  | 30.77 | 104 | 71  | 2  | 406 | 714  | 14 | 116 | 7.00E-12 | 60.1 |
| TcMYB8 | ATMYB33   | 44.83 | 116 | 63  | 2  | 520 | 864  | 23 | 135 | 2.00E-28 | 112  |
| TcMYB8 | ATMYB33   | 32    | 125 | 71  | 4  | 406 | 738  | 34 | 157 | 2.00E-12 | 62.8 |
| TcMYB8 | AtMYB41   | 46.6  | 103 | 54  | 1  | 562 | 867  | 14 | 116 | 3.00E-28 | 108  |
| TcMYB8 | AtMYB41   | 29.81 | 104 | 72  | 2  | 406 | 714  | 14 | 116 | 3.00E-12 | 60.5 |
| TcMYB8 | ATMYB15   | 46.3  | 108 | 57  | 1  | 556 | 876  | 12 | 119 | 3.00E-28 | 108  |
| TcMYB8 | ATMYB15   | 33.33 | 105 | 69  | 2  | 406 | 717  | 14 | 117 | 3.00E-14 | 66.6 |
| TcMYB8 | AtMYB81   | 46.73 | 107 | 56  | 1  | 544 | 861  | 16 | 122 | 4.00E-28 | 110  |
| TcMYB8 | AtMYB81   | 30.69 | 101 | 69  | 2  | 403 | 702  | 21 | 120 | 2.00E-11 | 59.3 |
| TcMYB8 | ATMYB3    | 45.71 | 105 | 56  | 1  | 562 | 873  | 14 | 118 | 5.00E-28 | 106  |
| TcMYB8 | ATMYB3    | 31.43 | 105 | 71  | 2  | 403 | 714  | 13 | 116 | 1.00E-13 | 64.7 |
| TcMYB8 | ATMYB3    | 34.62 | 52  | 34  | 1  | 406 | 561  | 67 | 117 | 5.00E-04 | 35   |
| TcMYB8 | MYB8      | 42.72 | 103 | 58  | 1  | 562 | 867  | 14 | 116 | 6.00E-28 | 105  |
| TcMYB8 | MYB8      | 30.48 | 105 | 72  | 2  | 403 | 714  | 13 | 116 | 5.00E-12 | 58.9 |
| TcMYB8 | ATMYB59-3 | 40    | 110 | 65  | 1  | 538 | 864  | 2  | 111 | 8.00E-28 | 105  |
| TcMYB8 | ATMYB59-3 | 33.02 | 106 | 70  | 2  | 406 | 720  | 10 | 114 | 8.00E-16 | 70.5 |
| TcMYB8 | AtMYB6    | 43.4  | 106 | 59  | 1  | 562 | 876  | 14 | 119 | 1.00E-27 | 104  |
| TcMYB8 | AtMYB6    | 29.36 | 109 | 76  | 2  | 391 | 714  | 9  | 116 | 6.00E-12 | 58.9 |
| TcMYB8 | ATMYB122  | 46.6  | 103 | 54  | 1  | 556 | 861  | 12 | 114 | 2.00E-27 | 106  |
| TcMYB8 | ATMYB122  | 29    | 100 | 70  | 2  | 406 | 702  | 14 | 112 | 2.00E-11 | 58.9 |
| TcMYB8 | AtMYB51   | 28.3  | 311 | 222 | 10 | 556 | 1485 | 13 | 271 | 2.00E-27 | 107  |
| TcMYB8 | AtMYB51   | 29.25 | 106 | 74  | 2  | 406 | 720  | 15 | 119 | 2.00E-12 | 61.6 |
| TcMYB8 | ATMYB14   | 41.82 | 110 | 63  | 1  | 562 | 888  | 14 | 123 | 3.00E-27 | 104  |
| TcMYB8 | ATMYB14   | 30.84 | 107 | 73  | 2  | 406 | 723  | 14 | 119 | 6.00E-15 | 68.2 |
| TcMYB8 | AtMYB74   | 38.35 | 133 | 81  | 2  | 556 | 951  | 13 | 144 | 3.00E-27 | 106  |
| TcMYB8 | AtMYB74   | 30.19 | 106 | 73  | 2  | 406 | 720  | 15 | 119 | 8.00E-12 | 59.7 |
| TcMYB8 | AtMYB18   | 48.54 | 103 | 51  | 2  | 562 | 864  | 12 | 113 | 3.00E-27 | 105  |
| TcMYB8 | AtMYB18   | 31.36 | 118 | 80  | 3  | 397 | 747  | 9  | 120 | 4.00E-12 | 60.1 |
| TcMYB8 | AtMYB50   | 47.17 | 106 | 54  | 2  | 556 | 867  | 12 | 116 | 3.00E-27 | 105  |
| TcMYB8 | AtMYB50   | 31.13 | 106 | 72  | 2  | 406 | 720  | 14 | 118 | 2.00E-10 | 55.1 |
| TcMYB8 | ATMYB48   | 43.14 | 102 | 57  | 1  | 562 | 864  | 9  | 110 | 3.00E-27 | 104  |
| TcMYB8 | ATMYB48   | 33.96 | 106 | 69  | 2  | 406 | 720  | 9  | 113 | 8.00E-16 | 70.9 |
| TcMYB8 | ATMYB86   | 47.17 | 106 | 54  | 2  | 556 | 867  | 12 | 116 | 3.00E-27 | 106  |
| TcMYB8 | ATMYB86   | 28.3  | 106 | 75  | 2  | 406 | 720  | 14 | 118 | 9.00E-10 | 53.5 |
| TcMYB8 | ATMYB80   | 42.06 | 107 | 61  | 1  | 553 | 870  | 11 | 117 | 3.00E-27 | 105  |
| TcMYB8 | ATMYB80   | 30.19 | 106 | 73  | 3  | 406 | 720  | 14 | 114 | 8.00E-10 | 53.5 |
| TcMYB8 | AtMYB32   | 35.06 | 174 | 107 | 4  | 562 | 1065 | 14 | 183 | 3.00E-27 | 104  |
| TcMYB8 | AtMYB32   | 31.13 | 106 | 72  | 2  | 400 | 714  | 12 | 116 | 5.00E-13 | 62.8 |
| TcMYB8 | ATMYB121  | 45.54 | 101 | 54  | 1  | 562 | 861  | 29 | 129 | 3.00E-27 | 104  |
| TcMYB8 | ATMYB121  | 28.93 | 159 | 112 | 2  | 406 | 879  | 29 | 186 | 2.00E-15 | 70.1 |
| TcMYB8 | AtMYB19   | 47.57 | 103 | 52  | 2  | 562 | 864  | 14 | 115 | 4.00E-27 | 104  |
| TcMYB8 | AtMYB19   | 30.19 | 106 | 73  | 2  | 388 | 702  | 8  | 112 | 1.00E-11 | 58.5 |
| TcMYB8 | AtMYB19   | 29.85 | 67  | 46  | 2  | 406 | 603  | 67 | 132 | 3.00E-05 | 38.9 |
| TcMYB8 | ATMYB55   | 44.44 | 117 | 52  | 1  | 556 | 867  | 12 | 128 | 4.00E-27 | 106  |
| TcMYB8 | ATMYB55   | 28.21 | 117 | 71  | 2  | 406 | 717  | 14 | 129 | 4.00E-10 | 54.7 |
| TcMYB8 | ATMYB2    | 42.16 | 102 | 58  | 1  | 562 | 864  | 22 | 123 | 4.00E-27 | 104  |
| TcMYB8 | ATMYB2    | 33.91 | 115 | 75  | 2  | 376 | 717  | 12 | 125 | 2.00E-14 | 67   |
| TcMYB8 | ATMYB71   | 44.34 | 106 | 57  | 2  | 562 | 873  | 20 | 124 | 6.00E-27 | 103  |
| TcMYB8 | ATMYB71   | 33.63 | 113 | 74  | 2  | 406 | 741  | 20 | 131 | 1.00E-14 | 67.4 |
| TcMYB8 | AtMYB79   | 45.63 | 103 | 54  | 2  | 562 | 864  | 8  | 109 | 6.00E-27 | 103  |
| TcMYB8 | AtMYB79   | 32.38 | 105 | 70  | 2  | 406 | 717  | 8  | 111 | 1.00E-13 | 64.3 |
| TcMYB8 | ATMYB61   | 48.11 | 106 | 53  | 2  | 556 | 867  | 12 | 116 | 7.00E-27 | 105  |
| TcMYB8 | ATMYB61   | 31.13 | 106 | 72  | 2  | 406 | 720  | 14 | 118 | 8.00E-11 | 57   |
| TcMYB8 | MYB7      | 43.81 | 105 | 58  | 1  | 562 | 873  | 14 | 118 | 1.00E-26 | 103  |
| TcMYB8 | MYB7      | 31.43 | 105 | 71  | 2  | 403 | 714  | 13 | 116 | 2.00E-12 | 61.2 |
| TcMYB8 | AtMYB112  | 39.09 | 110 | 66  | 1  | 535 | 861  | 25 | 134 | 1.00E-26 | 102  |
| TcMYB8 | AtMYB112  | 29.52 | 105 | 73  | 2  | 406 | 717  | 34 | 137 | 7.00E-11 | 55.8 |
| TcMYB8 | AtMYB20   | 46.23 | 106 | 55  | 2  | 556 | 867  | 12 | 116 | 1.00E-26 | 103  |
| TcMYB8 | AtMYB20   | 27.36 | 106 | 76  | 2  | 406 | 720  | 14 | 118 | 3.00E-10 | 54.3 |

|        |          |       |     |     |   |     |      |    |     |          |      |
|--------|----------|-------|-----|-----|---|-----|------|----|-----|----------|------|
| TcMYB8 | ATMYB46  | 44.66 | 103 | 56  | 1 | 562 | 867  | 20 | 122 | 2.00E-26 | 102  |
| TcMYB8 | ATMYB46  | 26.61 | 109 | 79  | 2 | 397 | 720  | 17 | 124 | 2.00E-08 | 48.9 |
| TcMYB8 | AtMYB97  | 46.6  | 103 | 54  | 1 | 556 | 861  | 19 | 121 | 2.00E-26 | 105  |
| TcMYB8 | AtMYB97  | 35    | 100 | 64  | 2 | 406 | 702  | 21 | 119 | 2.00E-12 | 62   |
| TcMYB8 | AtMYB103 | 46.6  | 103 | 54  | 1 | 562 | 867  | 14 | 116 | 2.00E-26 | 104  |
| TcMYB8 | AtMYB103 | 27.03 | 111 | 80  | 2 | 391 | 720  | 9  | 118 | 4.00E-10 | 54.7 |
| TcMYB8 | ATMYB0   | 39.66 | 116 | 69  | 1 | 547 | 891  | 11 | 126 | 2.00E-26 | 101  |
| TcMYB8 | ATMYB0   | 34.58 | 107 | 69  | 2 | 406 | 723  | 16 | 121 | 6.00E-15 | 67.8 |
| TcMYB8 | AtMYB43  | 46.23 | 106 | 55  | 2 | 556 | 867  | 12 | 116 | 2.00E-26 | 103  |
| TcMYB8 | AtMYB43  | 28.3  | 106 | 75  | 2 | 406 | 720  | 14 | 118 | 3.00E-10 | 54.7 |
| TcMYB8 | AtMYB85  | 47.12 | 104 | 53  | 2 | 562 | 867  | 14 | 116 | 2.00E-26 | 102  |
| TcMYB8 | AtMYB85  | 28.3  | 106 | 75  | 2 | 406 | 720  | 14 | 118 | 3.00E-10 | 54.3 |
| TcMYB8 | AtMYB17  | 46.3  | 108 | 56  | 2 | 556 | 873  | 12 | 118 | 3.00E-26 | 102  |
| TcMYB8 | AtMYB17  | 28.85 | 104 | 73  | 2 | 406 | 714  | 14 | 116 | 5.00E-12 | 60.1 |
| TcMYB8 | ATMYB13  | 33.33 | 183 | 112 | 5 | 556 | 1074 | 12 | 187 | 3.00E-26 | 101  |
| TcMYB8 | ATMYB13  | 30.77 | 104 | 71  | 2 | 406 | 714  | 14 | 116 | 1.00E-12 | 61.2 |
| TcMYB8 | ATMYB28  | 44.95 | 109 | 59  | 1 | 544 | 867  | 8  | 116 | 4.00E-26 | 103  |
| TcMYB8 | ATMYB28  | 30.77 | 104 | 71  | 2 | 406 | 714  | 14 | 116 | 6.00E-11 | 57.4 |
| TcMYB8 | ATMYB4   | 43.69 | 103 | 57  | 1 | 562 | 867  | 14 | 116 | 4.00E-26 | 101  |
| TcMYB8 | ATMYB4   | 31.19 | 109 | 74  | 2 | 391 | 714  | 9  | 116 | 2.00E-13 | 63.9 |
| TcMYB8 | ATMYB4   | 36.54 | 52  | 33  | 1 | 406 | 561  | 67 | 117 | 3.00E-04 | 35.8 |
| TcMYB8 | AtMYB116 | 41.18 | 102 | 59  | 1 | 562 | 864  | 20 | 121 | 5.00E-26 | 101  |
| TcMYB8 | AtMYB116 | 30.19 | 106 | 73  | 2 | 406 | 720  | 20 | 124 | 2.00E-11 | 58.2 |
| TcMYB8 | ATMYB66  | 41.75 | 103 | 59  | 1 | 562 | 867  | 18 | 120 | 6.00E-26 | 99   |
| TcMYB8 | ATMYB66  | 33.05 | 118 | 76  | 3 | 370 | 714  | 4  | 120 | 2.00E-16 | 71.6 |
| TcMYB8 | AtMYB42  | 46.15 | 104 | 54  | 2 | 562 | 867  | 14 | 116 | 7.00E-26 | 101  |
| TcMYB8 | AtMYB42  | 24.7  | 166 | 108 | 3 | 406 | 852  | 14 | 178 | 1.00E-09 | 52.8 |
| TcMYB8 | ATMYB57  | 40.91 | 110 | 64  | 1 | 535 | 861  | 18 | 127 | 7.00E-26 | 99   |
| TcMYB8 | ATMYB57  | 31.82 | 110 | 74  | 2 | 391 | 717  | 22 | 130 | 4.00E-12 | 58.9 |
| TcMYB8 | AtMYB108 | 41.35 | 104 | 60  | 1 | 553 | 861  | 18 | 121 | 7.00E-26 | 102  |
| TcMYB8 | AtMYB108 | 30.19 | 106 | 73  | 2 | 406 | 720  | 21 | 125 | 6.00E-11 | 57   |
| TcMYB8 | AtMYB10  | 43.27 | 104 | 57  | 2 | 562 | 867  | 16 | 118 | 8.00E-26 | 99.8 |
| TcMYB8 | AtMYB10  | 33.96 | 106 | 69  | 2 | 406 | 720  | 16 | 120 | 1.00E-14 | 67   |
| TcMYB8 | AtMYB24  | 40.78 | 103 | 60  | 1 | 562 | 867  | 19 | 121 | 8.00E-26 | 99   |
| TcMYB8 | AtMYB24  | 32.48 | 117 | 78  | 2 | 373 | 720  | 8  | 123 | 1.00E-12 | 60.5 |
| TcMYB8 | ATMYB101 | 48.57 | 105 | 52  | 2 | 556 | 864  | 18 | 121 | 1.00E-25 | 104  |
| TcMYB8 | ATMYB101 | 33.96 | 106 | 68  | 3 | 379 | 690  | 10 | 114 | 1.00E-11 | 60.1 |
| TcMYB8 | ATMYB16  | 41.9  | 105 | 60  | 1 | 556 | 867  | 12 | 116 | 1.00E-25 | 101  |
| TcMYB8 | ATMYB16  | 27.36 | 106 | 76  | 2 | 406 | 720  | 14 | 118 | 1.00E-10 | 55.8 |
| TcMYB8 | AtMYB40  | 40.57 | 106 | 61  | 2 | 556 | 867  | 12 | 116 | 1.00E-25 | 99.8 |
| TcMYB8 | AtMYB40  | 32.71 | 107 | 70  | 4 | 406 | 720  | 14 | 114 | 1.00E-08 | 49.7 |
| TcMYB8 | AtMYB40  | 34.62 | 52  | 33  | 2 | 406 | 558  | 67 | 116 | 9.00E-04 | 34.3 |
| TcMYB8 | ATMYB29  | 44.86 | 107 | 58  | 1 | 544 | 861  | 8  | 114 | 2.00E-25 | 101  |
| TcMYB8 | ATMYB29  | 32    | 100 | 67  | 2 | 406 | 702  | 14 | 112 | 1.00E-10 | 56.2 |
| TcMYB8 | AtMYB76  | 43.12 | 109 | 61  | 1 | 544 | 867  | 8  | 116 | 2.00E-25 | 100  |
| TcMYB8 | AtMYB76  | 29.91 | 107 | 74  | 2 | 406 | 723  | 14 | 119 | 9.00E-11 | 56.6 |
| TcMYB8 | ATMYB106 | 41.9  | 105 | 60  | 1 | 556 | 867  | 55 | 159 | 3.00E-25 | 101  |
| TcMYB8 | ATMYB106 | 28.3  | 106 | 75  | 2 | 406 | 720  | 57 | 161 | 8.00E-11 | 57   |
| TcMYB8 | ATMYB3   | 40.78 | 103 | 60  | 1 | 562 | 867  | 22 | 124 | 3.00E-25 | 97.8 |
| TcMYB8 | ATMYB3   | 25.91 | 193 | 125 | 5 | 373 | 897  | 6  | 192 | 9.00E-13 | 61.2 |
| TcMYB8 | AtMYB62  | 39.42 | 104 | 62  | 1 | 556 | 864  | 19 | 122 | 3.00E-25 | 99.4 |
| TcMYB8 | AtMYB62  | 31.78 | 107 | 71  | 4 | 406 | 720  | 21 | 125 | 3.00E-12 | 60.8 |
| TcMYB8 | ATMYB123 | 44.76 | 105 | 57  | 1 | 556 | 867  | 14 | 118 | 6.00E-25 | 97.8 |
| TcMYB8 | ATMYB123 | 26.72 | 116 | 84  | 2 | 403 | 747  | 15 | 129 | 3.00E-12 | 60.1 |
| TcMYB8 | ATMYB5   | 40.78 | 103 | 60  | 1 | 562 | 867  | 25 | 127 | 6.00E-25 | 97.4 |
| TcMYB8 | ATMYB5   | 28.7  | 108 | 72  | 3 | 406 | 714  | 25 | 127 | 1.00E-10 | 55.5 |
| TcMYB8 | AtMYB83  | 42.06 | 107 | 61  | 1 | 550 | 867  | 28 | 134 | 8.00E-25 | 99.4 |
| TcMYB8 | AtMYB83  | 29.63 | 108 | 75  | 2 | 406 | 726  | 32 | 138 | 3.00E-08 | 48.9 |
| TcMYB8 | ATMYB23  | 40.78 | 103 | 60  | 1 | 562 | 867  | 14 | 116 | 8.00E-25 | 96.3 |
| TcMYB8 | ATMYB23  | 33.33 | 111 | 73  | 2 | 385 | 714  | 7  | 116 | 6.00E-16 | 70.5 |
| TcMYB8 | ATMYB34  | 43.69 | 103 | 57  | 1 | 562 | 867  | 14 | 116 | 9.00E-25 | 98.2 |
| TcMYB8 | ATMYB34  | 28.3  | 106 | 75  | 2 | 406 | 720  | 14 | 118 | 9.00E-11 | 56.2 |
| TcMYB8 | AtMYB47  | 42.31 | 104 | 59  | 1 | 562 | 870  | 14 | 117 | 9.00E-25 | 97.4 |
| TcMYB8 | AtMYB47  | 23.64 | 110 | 79  | 3 | 406 | 720  | 14 | 118 | 6.00E-08 | 47.4 |
| TcMYB8 | ATMYB120 | 45.63 | 103 | 55  | 1 | 556 | 861  | 26 | 128 | 2.00E-24 | 100  |
| TcMYB8 | ATMYB120 | 34    | 100 | 65  | 2 | 406 | 702  | 28 | 126 | 5.00E-11 | 58.2 |
| TcMYB8 | ATMYB96  | 41.82 | 110 | 63  | 1 | 562 | 888  | 14 | 123 | 2.00E-24 | 98.6 |
| TcMYB8 | ATMYB96  | 32.46 | 114 | 76  | 2 | 406 | 744  | 14 | 126 | 4.00E-14 | 67   |
| TcMYB8 | ATMYB96  | 33.87 | 62  | 41  | 1 | 406 | 591  | 67 | 127 | 7.00E-05 | 38.1 |
| TcMYB8 | AtMYB36  | 42.99 | 107 | 59  | 2 | 553 | 867  | 11 | 117 | 3.00E-24 | 97.4 |
| TcMYB8 | AtMYB36  | 31.03 | 116 | 78  | 4 | 406 | 747  | 14 | 124 | 3.00E-11 | 58.2 |
| TcMYB8 | AtMYB114 | 42.59 | 108 | 57  | 2 | 556 | 864  | 8  | 111 | 3.00E-24 | 92   |
| TcMYB8 | AtMYB114 | 30.69 | 101 | 69  | 2 | 406 | 705  | 10 | 109 | 2.00E-13 | 61.2 |
| TcMYB8 | ATMYB31  | 43.93 | 107 | 55  | 2 | 562 | 867  | 14 | 116 | 5.00E-24 | 96.7 |
| TcMYB8 | ATMYB31  | 30.77 | 104 | 71  | 2 | 406 | 714  | 14 | 116 | 1.00E-11 | 59.3 |
| TcMYB8 | AtMYB60  | 44.66 | 103 | 56  | 1 | 562 | 867  | 14 | 116 | 7.00E-24 | 95.1 |
| TcMYB8 | AtMYB60  | 28.95 | 152 | 92  | 5 | 406 | 813  | 14 | 160 | 1.00E-13 | 65.1 |
| TcMYB8 | ATMYB94  | 42.72 | 103 | 58  | 1 | 562 | 867  | 14 | 116 | 7.00E-24 | 96.3 |
| TcMYB8 | ATMYB94  | 31.13 | 106 | 72  | 2 | 406 | 720  | 14 | 118 | 5.00E-13 | 63.5 |
| TcMYB8 | AtMYB124 | 39.8  | 98  | 59  | 0 | 571 | 864  | 28 | 125 | 1.00E-23 | 97.1 |

|        |           |       |     |     |    |      |      |     |     |          |      |
|--------|-----------|-------|-----|-----|----|------|------|-----|-----|----------|------|
| TcMYB8 | AtMYB124  | 28.7  | 108 | 77  | 1  | 415  | 738  | 28  | 134 | 1.00E-13 | 66.2 |
| TcMYB8 | ATMYB11   | 39.32 | 117 | 70  | 1  | 562  | 909  | 14  | 130 | 2.00E-23 | 95.5 |
| TcMYB8 | ATMYB11   | 30.77 | 104 | 71  | 2  | 406  | 714  | 14  | 116 | 9.00E-11 | 56.6 |
| TcMYB8 | ATMYB30   | 42.72 | 103 | 58  | 1  | 562  | 867  | 14  | 116 | 2.00E-23 | 94.7 |
| TcMYB8 | ATMYB30   | 29.84 | 124 | 82  | 3  | 391  | 747  | 9   | 127 | 5.00E-13 | 63.5 |
| TcMYB8 | ATMYB99   | 43.36 | 113 | 55  | 3  | 556  | 867  | 13  | 124 | 2.00E-23 | 92.8 |
| TcMYB8 | ATMYB99   | 29.73 | 111 | 70  | 4  | 406  | 714  | 15  | 124 | 8.00E-10 | 52.8 |
| TcMYB8 | ATMYB37   | 42.45 | 106 | 59  | 2  | 562  | 873  | 14  | 119 | 2.00E-23 | 94.7 |
| TcMYB8 | ATMYB37   | 33.03 | 109 | 67  | 4  | 406  | 714  | 14  | 117 | 4.00E-11 | 57.8 |
| TcMYB8 | ATMYB75   | 42.59 | 108 | 57  | 2  | 556  | 864  | 8   | 111 | 4.00E-23 | 92   |
| TcMYB8 | ATMYB75   | 30.69 | 101 | 69  | 2  | 406  | 705  | 10  | 109 | 1.00E-12 | 61.2 |
| TcMYB8 | ATMYB90   | 29.19 | 209 | 143 | 4  | 556  | 1167 | 8   | 198 | 4.00E-23 | 92   |
| TcMYB8 | ATMYB90   | 30.69 | 101 | 69  | 2  | 406  | 705  | 10  | 109 | 6.00E-12 | 59.3 |
| TcMYB8 | ATMYB111  | 40    | 110 | 65  | 1  | 556  | 882  | 12  | 121 | 5.00E-23 | 94   |
| TcMYB8 | ATMYB111  | 32.69 | 104 | 69  | 2  | 406  | 714  | 14  | 116 | 7.00E-12 | 60.1 |
| TcMYB8 | AtMYB82   | 37.8  | 127 | 78  | 1  | 562  | 939  | 14  | 140 | 5.00E-23 | 90.5 |
| TcMYB8 | AtMYB82   | 31.48 | 108 | 71  | 3  | 391  | 705  | 7   | 113 | 5.00E-13 | 61.6 |
| TcMYB8 | ATMYB84   | 42.06 | 107 | 60  | 2  | 553  | 867  | 11  | 117 | 8.00E-23 | 92.8 |
| TcMYB8 | ATMYB84   | 29.55 | 132 | 82  | 5  | 406  | 768  | 14  | 144 | 4.00E-11 | 57.4 |
| TcMYB8 | ATMYB12   | 30.82 | 159 | 109 | 2  | 562  | 1035 | 14  | 165 | 2.00E-22 | 92.8 |
| TcMYB8 | ATMYB12   | 26.73 | 217 | 147 | 7  | 406  | 1020 | 14  | 219 | 3.00E-12 | 61.6 |
| TcMYB8 | ATMYB68   | 41.12 | 107 | 61  | 2  | 553  | 867  | 11  | 117 | 2.00E-22 | 92.8 |
| TcMYB8 | ATMYB68   | 28.48 | 158 | 104 | 5  | 406  | 852  | 14  | 164 | 6.00E-11 | 57.4 |
| TcMYB8 | ATMYB78   | 34.78 | 115 | 60  | 2  | 562  | 861  | 28  | 142 | 3.00E-22 | 91.3 |
| TcMYB8 | ATMYB78   | 27.73 | 119 | 72  | 2  | 406  | 720  | 28  | 146 | 1.00E-09 | 52.8 |
| TcMYB8 | ATMYB87   | 39.62 | 106 | 62  | 2  | 562  | 873  | 14  | 119 | 3.00E-22 | 90.9 |
| TcMYB8 | ATMYB87   | 33.63 | 113 | 73  | 4  | 406  | 738  | 14  | 121 | 5.00E-12 | 60.1 |
| TcMYB8 | ATMYB88   | 37.76 | 98  | 61  | 0  | 571  | 864  | 33  | 130 | 5.00E-22 | 92.8 |
| TcMYB8 | ATMYB88   | 29.46 | 112 | 79  | 1  | 415  | 750  | 33  | 143 | 6.00E-15 | 70.5 |
| TcMYB8 | AtMYB104  | 40.95 | 105 | 57  | 2  | 562  | 861  | 18  | 118 | 7.00E-22 | 91.3 |
| TcMYB8 | AtMYB104  | 32.67 | 101 | 63  | 3  | 403  | 690  | 17  | 112 | 3.00E-12 | 61.6 |
| TcMYB8 | AtMYB113  | 40.74 | 108 | 59  | 2  | 556  | 864  | 8   | 111 | 2.00E-21 | 87   |
| TcMYB8 | AtMYB113  | 31.68 | 101 | 68  | 2  | 406  | 705  | 10  | 109 | 3.00E-12 | 60.1 |
| TcMYB8 | ATMYB38   | 36.61 | 112 | 69  | 1  | 553  | 882  | 11  | 122 | 1.00E-20 | 86.3 |
| TcMYB8 | ATMYB38   | 31.78 | 107 | 71  | 4  | 406  | 720  | 14  | 115 | 2.00E-09 | 52.4 |
| TcMYB8 | ATMYB91   | 37.23 | 94  | 56  | 1  | 571  | 843  | 7   | 100 | 9.00E-17 | 75.5 |
| TcMYB8 | ATMYB91   | 29.23 | 130 | 89  | 3  | 415  | 795  | 7   | 129 | 5.00E-14 | 67   |
| TcMYB8 | ATMYB91   | 35.71 | 70  | 45  | 3  | 406  | 615  | 59  | 123 | 5.00E-04 | 35.4 |
| TcMYB9 | ATMYB91   | 70.83 | 144 | 42  | 1  | 1    | 432  | 1   | 141 | 5.00E-67 | 214  |
| TcMYB9 | ATMYB91   | 57.84 | 102 | 43  | 0  | 1252 | 1557 | 259 | 360 | 4.00E-35 | 128  |
| TcMYB9 | AtMYB82   | 42.34 | 111 | 64  | 1  | 7    | 339  | 13  | 121 | 3.00E-28 | 104  |
| TcMYB9 | ATMYB30   | 30.95 | 210 | 127 | 5  | 19   | 594  | 17  | 222 | 2.00E-27 | 105  |
| TcMYB9 | ATMYB15   | 28.43 | 197 | 138 | 2  | 7    | 588  | 13  | 207 | 8.00E-27 | 102  |
| TcMYB9 | ATMYB59-3 | 40.19 | 107 | 64  | 1  | 19   | 339  | 13  | 117 | 2.00E-26 | 100  |
| TcMYB9 | ATMYB66   | 42.86 | 112 | 63  | 2  | 19   | 351  | 21  | 130 | 3.00E-26 | 99   |
| TcMYB9 | ATMYB94   | 42.98 | 114 | 65  | 2  | 19   | 360  | 17  | 125 | 3.00E-26 | 102  |
| TcMYB9 | AtMYB60   | 41.44 | 111 | 65  | 1  | 19   | 351  | 17  | 125 | 3.00E-26 | 100  |
| TcMYB9 | AtMYB19   | 32.86 | 213 | 125 | 8  | 4    | 588  | 9   | 193 | 4.00E-26 | 100  |
| TcMYB9 | ATMYB48   | 39.25 | 107 | 65  | 1  | 19   | 339  | 12  | 116 | 4.00E-26 | 100  |
| TcMYB9 | AtMYB79   | 38.14 | 118 | 73  | 1  | 19   | 372  | 11  | 126 | 4.00E-26 | 100  |
| TcMYB9 | AtMYB62   | 32.23 | 211 | 131 | 7  | 10   | 606  | 21  | 213 | 5.00E-26 | 100  |
| TcMYB9 | ATMYB57   | 38.79 | 116 | 71  | 1  | 19   | 366  | 30  | 143 | 6.00E-26 | 98.2 |
| TcMYB9 | ATMYB120  | 26.88 | 372 | 234 | 12 | 19   | 1020 | 31  | 366 | 7.00E-26 | 103  |
| TcMYB9 | ATMYB96   | 43.27 | 104 | 59  | 1  | 19   | 330  | 17  | 118 | 1.00E-25 | 100  |
| TcMYB9 | AtMYB104  | 36.81 | 144 | 89  | 3  | 10   | 435  | 18  | 158 | 2.00E-25 | 100  |
| TcMYB9 | ATMYB31   | 44.12 | 102 | 57  | 1  | 19   | 324  | 17  | 116 | 4.00E-25 | 99   |
| TcMYB9 | AtMYB116  | 42.31 | 104 | 60  | 1  | 19   | 330  | 23  | 124 | 6.00E-25 | 97.4 |
| TcMYB9 | ATMYB123  | 29.65 | 226 | 140 | 5  | 10   | 630  | 16  | 239 | 9.00E-25 | 96.3 |
| TcMYB9 | ATMYB3    | 39.42 | 104 | 63  | 1  | 19   | 330  | 25  | 126 | 1.00E-24 | 95.1 |
| TcMYB9 | ATMYB63   | 36.67 | 120 | 76  | 1  | 7    | 366  | 15  | 132 | 2.00E-24 | 95.9 |
| TcMYB9 | ATMYB71   | 35.59 | 118 | 76  | 1  | 19   | 372  | 23  | 138 | 3.00E-24 | 95.1 |
| TcMYB9 | ATMYB80   | 39.62 | 106 | 64  | 1  | 7    | 324  | 13  | 116 | 4.00E-24 | 95.9 |
| TcMYB9 | AtMYB18   | 41.18 | 119 | 67  | 3  | 7    | 354  | 8   | 120 | 4.00E-24 | 95.1 |
| TcMYB9 | ATMYB2    | 39.62 | 106 | 64  | 1  | 19   | 336  | 25  | 128 | 4.00E-24 | 94.7 |
| TcMYB9 | ATMYB0    | 42.16 | 102 | 59  | 1  | 19   | 324  | 19  | 118 | 4.00E-24 | 93.6 |
| TcMYB9 | AtMYB45   | 38.79 | 116 | 68  | 2  | 4    | 342  | 15  | 128 | 4.00E-24 | 94.4 |
| TcMYB9 | ATMYB23   | 40.2  | 102 | 61  | 1  | 19   | 324  | 17  | 116 | 5.00E-24 | 93.2 |
| TcMYB9 | AtMYB97   | 41.96 | 112 | 65  | 2  | 19   | 354  | 24  | 127 | 5.00E-24 | 96.7 |
| TcMYB9 | AtMYB108  | 28.57 | 217 | 138 | 4  | 7    | 606  | 20  | 231 | 5.00E-24 | 95.5 |
| TcMYB9 | AtMYB112  | 39.62 | 106 | 64  | 1  | 10   | 327  | 34  | 137 | 6.00E-24 | 93.6 |
| TcMYB9 | ATMYB101  | 40.18 | 112 | 67  | 2  | 19   | 354  | 23  | 126 | 6.00E-24 | 97.4 |
| TcMYB9 | ATMYB121  | 37.96 | 108 | 67  | 1  | 19   | 342  | 32  | 137 | 8.00E-24 | 94   |
| TcMYB9 | AtMYB113  | 43.81 | 105 | 59  | 1  | 19   | 333  | 13  | 115 | 8.00E-24 | 93.2 |
| TcMYB9 | AtMYB114  | 42.57 | 101 | 58  | 1  | 19   | 321  | 13  | 111 | 1.00E-23 | 89.7 |
| TcMYB9 | AtMYB50   | 42.86 | 105 | 60  | 1  | 19   | 333  | 17  | 119 | 1.00E-23 | 94.4 |
| TcMYB9 | ATMYB86   | 41.9  | 105 | 61  | 1  | 19   | 333  | 17  | 119 | 1.00E-23 | 94.7 |
| TcMYB9 | ATMYB75   | 42.48 | 113 | 61  | 2  | 19   | 345  | 13  | 123 | 2.00E-23 | 92.4 |
| TcMYB9 | ATMYB84   | 41.96 | 112 | 63  | 3  | 19   | 348  | 17  | 126 | 2.00E-23 | 93.6 |
| TcMYB9 | AtMYB24   | 39.22 | 102 | 62  | 1  | 19   | 324  | 22  | 121 | 2.00E-23 | 91.3 |
| TcMYB9 | AtMYB56   | 39.82 | 113 | 68  | 1  | 10   | 348  | 93  | 202 | 2.00E-23 | 93.6 |

|        |          |       |     |     |   |     |     |     |     |          |      |
|--------|----------|-------|-----|-----|---|-----|-----|-----|-----|----------|------|
| TcMYB9 | ATMYB68  | 31.31 | 198 | 127 | 5 | 19  | 585 | 17  | 212 | 2.00E-23 | 94.4 |
| TcMYB9 | AtMYB51  | 40.95 | 105 | 62  | 1 | 19  | 333 | 18  | 120 | 2.00E-23 | 94   |
| TcMYB9 | AtMYB36  | 40    | 115 | 68  | 2 | 19  | 360 | 17  | 129 | 3.00E-23 | 93.6 |
| TcMYB9 | ATMYB65  | 40.18 | 112 | 67  | 2 | 19  | 354 | 46  | 149 | 3.00E-23 | 95.5 |
| TcMYB9 | ATMYB90  | 43.56 | 101 | 57  | 1 | 19  | 321 | 13  | 111 | 4.00E-23 | 91.3 |
| TcMYB9 | ATMYB33  | 40.18 | 112 | 67  | 2 | 19  | 354 | 37  | 140 | 5.00E-23 | 94.7 |
| TcMYB9 | AtMYB10  | 37.61 | 117 | 73  | 1 | 7   | 357 | 15  | 129 | 6.00E-23 | 90.5 |
| TcMYB9 | ATMYB34  | 42.86 | 105 | 60  | 1 | 19  | 333 | 17  | 119 | 7.00E-23 | 91.7 |
| TcMYB9 | ATMYB55  | 33.51 | 188 | 109 | 4 | 19  | 534 | 17  | 191 | 8.00E-23 | 92.4 |
| TcMYB9 | AtMYB17  | 44.12 | 102 | 57  | 1 | 19  | 324 | 17  | 116 | 1.00E-22 | 91.3 |
| TcMYB9 | ATMYB14  | 38.89 | 108 | 66  | 1 | 7   | 330 | 13  | 118 | 1.00E-22 | 90.1 |
| TcMYB9 | ATMYB5   | 36.13 | 119 | 76  | 2 | 7   | 363 | 24  | 135 | 1.00E-22 | 90.1 |
| TcMYB9 | AtMYB53  | 41.18 | 102 | 60  | 1 | 19  | 324 | 17  | 116 | 1.00E-22 | 91.3 |
| TcMYB9 | AtMYB49  | 41.18 | 102 | 60  | 1 | 19  | 324 | 17  | 116 | 1.00E-22 | 91.3 |
| TcMYB9 | ATMYB28  | 33.12 | 160 | 106 | 2 | 19  | 495 | 17  | 174 | 2.00E-22 | 91.7 |
| TcMYB9 | ATMYB61  | 40    | 105 | 63  | 1 | 19  | 333 | 17  | 119 | 3.00E-22 | 90.9 |
| TcMYB9 | AtMYB41  | 42.16 | 102 | 59  | 1 | 19  | 324 | 17  | 116 | 3.00E-22 | 89.4 |
| TcMYB9 | ATMYB29  | 41.9  | 105 | 61  | 1 | 19  | 333 | 17  | 119 | 4.00E-22 | 90.1 |
| TcMYB9 | ATMYB46  | 40.38 | 104 | 62  | 1 | 19  | 330 | 23  | 124 | 4.00E-22 | 89   |
| TcMYB9 | AtMYB107 | 39.22 | 102 | 62  | 1 | 19  | 324 | 17  | 116 | 4.00E-22 | 89.7 |
| TcMYB9 | ATMYB16  | 39.22 | 102 | 62  | 1 | 19  | 324 | 17  | 116 | 5.00E-22 | 89.7 |
| TcMYB9 | AtMYB103 | 38.89 | 108 | 66  | 1 | 7   | 330 | 13  | 118 | 6.00E-22 | 90.1 |
| TcMYB9 | ATMYB67  | 39.62 | 106 | 64  | 1 | 7   | 324 | 23  | 126 | 7.00E-22 | 89   |
| TcMYB9 | ATMYB3   | 39.22 | 102 | 62  | 1 | 19  | 324 | 17  | 116 | 7.00E-22 | 87.8 |
| TcMYB9 | ATMYB119 | 36.61 | 112 | 71  | 1 | 16  | 351 | 107 | 215 | 7.00E-22 | 90.5 |
| TcMYB9 | ATMYB37  | 40    | 115 | 69  | 1 | 7   | 351 | 13  | 126 | 1.00E-21 | 88.6 |
| TcMYB9 | ATMYB106 | 39.22 | 102 | 62  | 1 | 19  | 324 | 60  | 159 | 1.00E-21 | 89.4 |
| TcMYB9 | ATMYB92  | 39.22 | 102 | 62  | 1 | 19  | 324 | 17  | 116 | 1.00E-21 | 88.6 |
| TcMYB9 | AtMYB81  | 44.68 | 94  | 52  | 1 | 19  | 300 | 25  | 116 | 1.00E-21 | 89.7 |
| TcMYB9 | AtMYB9   | 39.22 | 102 | 62  | 1 | 19  | 324 | 17  | 116 | 1.00E-21 | 88.6 |
| TcMYB9 | ATMYB26  | 29.03 | 217 | 119 | 5 | 7   | 552 | 13  | 228 | 1.00E-21 | 89   |
| TcMYB9 | AtMYB74  | 42.16 | 102 | 59  | 1 | 19  | 324 | 18  | 117 | 2.00E-21 | 88.2 |
| TcMYB9 | ATMYB122 | 40.95 | 105 | 62  | 1 | 19  | 333 | 17  | 119 | 2.00E-21 | 88.2 |
| TcMYB9 | ATMYB58  | 36.7  | 109 | 69  | 1 | 7   | 333 | 15  | 121 | 2.00E-21 | 87   |
| TcMYB9 | AtMYB64  | 36.03 | 136 | 82  | 3 | 16  | 408 | 107 | 239 | 3.00E-21 | 88.6 |
| TcMYB9 | AtMYB76  | 41.18 | 102 | 60  | 1 | 19  | 324 | 17  | 116 | 3.00E-21 | 87.4 |
| TcMYB9 | ATMYB13  | 31.35 | 185 | 127 | 5 | 19  | 573 | 17  | 173 | 4.00E-21 | 85.5 |
| TcMYB9 | ATMYB4   | 41.18 | 102 | 60  | 1 | 19  | 324 | 17  | 116 | 4.00E-21 | 86.3 |
| TcMYB9 | AtMYB27  | 39.05 | 105 | 63  | 2 | 10  | 321 | 11  | 113 | 4.00E-21 | 85.1 |
| TcMYB9 | MYB7     | 39.05 | 105 | 64  | 1 | 19  | 333 | 17  | 119 | 6.00E-21 | 85.5 |
| TcMYB9 | ATMYB95  | 39.05 | 105 | 64  | 1 | 19  | 333 | 17  | 119 | 6.00E-21 | 85.5 |
| TcMYB9 | AtMYB32  | 39.05 | 105 | 64  | 1 | 19  | 333 | 17  | 119 | 6.00E-21 | 85.5 |
| TcMYB9 | ATMYB102 | 41.18 | 102 | 60  | 1 | 19  | 324 | 17  | 116 | 7.00E-21 | 86.7 |
| TcMYB9 | ATMYB87  | 37.38 | 107 | 66  | 2 | 19  | 336 | 17  | 121 | 7.00E-21 | 85.9 |
| TcMYB9 | ATMYB52  | 36.52 | 115 | 73  | 1 | 1   | 345 | 2   | 113 | 7.00E-21 | 84.7 |
| TcMYB9 | ATMYB72  | 36.79 | 106 | 67  | 1 | 7   | 324 | 15  | 118 | 1.00E-20 | 85.1 |
| TcMYB9 | ATMYB12  | 36.79 | 106 | 67  | 1 | 7   | 324 | 13  | 116 | 2.00E-20 | 85.9 |
| TcMYB9 | MYB8     | 35.29 | 102 | 66  | 1 | 19  | 324 | 17  | 116 | 2.00E-20 | 82.8 |
| TcMYB9 | AtMYB98  | 38.32 | 107 | 66  | 1 | 16  | 336 | 219 | 322 | 2.00E-20 | 86.3 |
| TcMYB9 | AtMYB98  | 32.39 | 71  | 47  | 1 | 124 | 333 | 200 | 270 | 2.00E-06 | 42   |
| TcMYB9 | AtMYB47  | 36.7  | 109 | 69  | 1 | 7   | 333 | 13  | 119 | 2.00E-20 | 84   |
| TcMYB9 | AtMYB85  | 42.16 | 102 | 59  | 1 | 19  | 324 | 17  | 116 | 2.00E-20 | 83.6 |
| TcMYB9 | ATMYB105 | 37.96 | 108 | 67  | 1 | 10  | 333 | 107 | 211 | 3.00E-20 | 84.3 |
| TcMYB9 | AtMYB42  | 40.74 | 108 | 64  | 1 | 1   | 324 | 11  | 116 | 3.00E-20 | 83.6 |
| TcMYB9 | AtMYB83  | 36.84 | 114 | 72  | 1 | 19  | 360 | 35  | 146 | 4.00E-20 | 84.3 |
| TcMYB9 | ATMYB35  | 39.22 | 102 | 62  | 1 | 19  | 324 | 17  | 116 | 5.00E-20 | 83.6 |
| TcMYB9 | AtMYB20  | 39.42 | 104 | 63  | 1 | 19  | 330 | 17  | 118 | 6.00E-20 | 82.8 |
| TcMYB9 | ATMYB54  | 32.62 | 141 | 85  | 3 | 1   | 393 | 3   | 140 | 1.00E-19 | 81.3 |
| TcMYB9 | AtMYB117 | 38.32 | 107 | 66  | 1 | 10  | 330 | 98  | 201 | 1.00E-19 | 83.2 |
| TcMYB9 | ATMYB69  | 39.45 | 109 | 65  | 2 | 7   | 330 | 18  | 122 | 1.00E-19 | 81.3 |
| TcMYB9 | ATMYB38  | 38.32 | 107 | 65  | 2 | 7   | 324 | 13  | 117 | 1.00E-19 | 82   |
| TcMYB9 | ATMYB118 | 34.51 | 113 | 74  | 1 | 16  | 354 | 191 | 300 | 1.00E-19 | 83.6 |
| TcMYB9 | AtMYB6   | 36.27 | 102 | 65  | 1 | 19  | 324 | 17  | 116 | 2.00E-19 | 80.5 |
| TcMYB9 | AtMYB93  | 38.24 | 102 | 63  | 1 | 19  | 324 | 17  | 116 | 2.00E-19 | 82.4 |
| TcMYB9 | ATMYB111 | 35.71 | 98  | 63  | 1 | 7   | 300 | 13  | 108 | 2.00E-19 | 82   |
| TcMYB9 | ATMYB11  | 33.96 | 106 | 70  | 1 | 7   | 324 | 13  | 116 | 4.00E-19 | 81.3 |
| TcMYB9 | AtMYB43  | 40.38 | 104 | 62  | 1 | 19  | 330 | 17  | 118 | 5.00E-19 | 80.9 |
| TcMYB9 | ATMYB25  | 40.4  | 99  | 59  | 1 | 4   | 300 | 48  | 143 | 7.00E-19 | 80.9 |
| TcMYB9 | ATMYB78  | 31.43 | 140 | 82  | 3 | 10  | 387 | 28  | 162 | 8.00E-19 | 80.1 |
| TcMYB9 | ATMYB44  | 30.1  | 206 | 142 | 6 | 19  | 630 | 9   | 180 | 8.00E-19 | 79.7 |
| TcMYB9 | ATMYB99  | 39.45 | 109 | 59  | 2 | 19  | 324 | 18  | 124 | 2.00E-18 | 77.8 |
| TcMYB9 | AtMYB115 | 36.04 | 111 | 69  | 2 | 16  | 342 | 160 | 267 | 4.00E-18 | 78.6 |
| TcMYB9 | ATMYB73  | 37.23 | 94  | 59  | 1 | 19  | 300 | 16  | 106 | 8.00E-18 | 77   |
| TcMYB9 | AtMYB70  | 37.23 | 94  | 59  | 1 | 19  | 300 | 16  | 106 | 1.00E-17 | 76.3 |
| TcMYB9 | ATMYB77  | 28.38 | 222 | 149 | 7 | 19  | 654 | 9   | 218 | 2.00E-17 | 75.9 |
| TcMYB9 | AtMYB109 | 31.34 | 134 | 92  | 1 | 4   | 405 | 54  | 184 | 2.00E-17 | 76.6 |
| TcMYB9 | AtMYB40  | 34.58 | 107 | 70  | 1 | 7   | 327 | 13  | 117 | 4.00E-17 | 73.9 |
| TcMYB9 | ATMYB88  | 30.23 | 129 | 88  | 2 | 4   | 384 | 26  | 151 | 9.00E-17 | 75.1 |
| TcMYB9 | ATMYB110 | 34.26 | 108 | 71  | 1 | 10  | 333 | 67  | 171 | 1.00E-16 | 73.6 |
| TcMYB9 | AtMYB22  | 34.62 | 104 | 67  | 3 | 10  | 318 | 54  | 152 | 8.00E-16 | 70.1 |

|         |           |       |     |     |   |    |     |     |     |          |      |
|---------|-----------|-------|-----|-----|---|----|-----|-----|-----|----------|------|
| TcMYB9  | AtMYB124  | 31.36 | 118 | 79  | 2 | 4  | 351 | 21  | 135 | 2.00E-15 | 70.9 |
| TcMYB9  | AtMYB1    | 37.23 | 94  | 59  | 1 | 19 | 300 | 58  | 148 | 2.00E-15 | 70.5 |
| TcMYB9  | AtMYB100  | 34.23 | 111 | 72  | 4 | 7  | 336 | 25  | 130 | 2.00E-15 | 68.2 |
| TcMYB9  | AtMYB89   | 30.43 | 115 | 79  | 2 | 19 | 360 | 59  | 170 | 2.00E-14 | 64.3 |
| TcMYB10 | AtMYB70   | 43.81 | 105 | 57  | 2 | 49 | 357 | 15  | 115 | 2.00E-18 | 76.6 |
| TcMYB10 | ATMYB44   | 52.86 | 70  | 33  | 0 | 49 | 258 | 8   | 77  | 3.00E-18 | 76.3 |
| TcMYB10 | ATMYB73   | 41.75 | 103 | 60  | 1 | 49 | 357 | 15  | 115 | 9.00E-18 | 75.1 |
| TcMYB10 | ATMYB77   | 39.47 | 114 | 67  | 2 | 49 | 384 | 8   | 117 | 1.00E-17 | 74.3 |
| TcMYB10 | ATMYB25   | 40.74 | 108 | 50  | 2 | 25 | 306 | 44  | 151 | 2.00E-17 | 74.7 |
| TcMYB10 | AtMYB109  | 48.24 | 85  | 40  | 1 | 16 | 258 | 43  | 127 | 2.00E-17 | 74.7 |
| TcMYB10 | AtMYB1    | 38.74 | 111 | 51  | 2 | 4  | 285 | 37  | 147 | 5.00E-15 | 67.4 |
| TcMYB10 | ATMYB3    | 28.23 | 209 | 130 | 8 | 13 | 579 | 9   | 211 | 2.00E-12 | 58.2 |
| TcMYB10 | AtMYB56   | 31.2  | 125 | 62  | 3 | 52 | 354 | 96  | 220 | 9.00E-12 | 57.4 |
| TcMYB10 | ATMYB54   | 31.4  | 121 | 62  | 3 | 52 | 351 | 9   | 129 | 1.00E-11 | 56.2 |
| TcMYB10 | ATMYB69   | 28.79 | 132 | 82  | 2 | 52 | 411 | 22  | 147 | 2.00E-11 | 55.8 |
| TcMYB10 | ATMYB52   | 34.44 | 90  | 47  | 1 | 52 | 285 | 8   | 97  | 6.00E-11 | 54.3 |
| TcMYB10 | ATMYB63   | 26.97 | 152 | 110 | 4 | 49 | 501 | 18  | 158 | 2.00E-10 | 53.1 |
| TcMYB10 | AtMYB18   | 30.54 | 167 | 99  | 5 | 52 | 501 | 15  | 180 | 6.00E-10 | 51.6 |
| TcMYB10 | AtMYB19   | 30.46 | 174 | 100 | 8 | 52 | 510 | 17  | 181 | 2.00E-09 | 50.1 |
| TcMYB10 | AtMYB117  | 32.22 | 90  | 49  | 1 | 52 | 285 | 101 | 190 | 4.00E-09 | 49.3 |
| TcMYB10 | ATMYB105  | 32.22 | 90  | 49  | 1 | 52 | 285 | 110 | 199 | 5.00E-09 | 48.9 |
| TcMYB10 | AtMYB112  | 28.91 | 128 | 77  | 4 | 49 | 390 | 36  | 153 | 9.00E-09 | 47.8 |
| TcMYB10 | AtMYB107  | 24.44 | 225 | 123 | 7 | 10 | 543 | 9   | 227 | 9.00E-09 | 48.1 |
| TcMYB10 | AtMYB108  | 27.23 | 202 | 123 | 7 | 1  | 534 | 13  | 207 | 9.00E-09 | 48.1 |
| TcMYB10 | ATMYB121  | 35.4  | 113 | 58  | 4 | 34 | 327 | 26  | 137 | 1.00E-08 | 47.8 |
| TcMYB10 | ATMYB59-3 | 31.3  | 131 | 71  | 6 | 49 | 384 | 12  | 141 | 1.00E-08 | 47.4 |
| TcMYB10 | ATMYB80   | 33.33 | 99  | 51  | 3 | 52 | 303 | 17  | 115 | 2.00E-08 | 47.4 |
| TcMYB10 | ATMYB37   | 34.4  | 125 | 65  | 7 | 49 | 372 | 16  | 139 | 2.00E-08 | 47.4 |
| TcMYB10 | ATMYB48   | 29.86 | 144 | 85  | 6 | 1  | 384 | 2   | 137 | 2.00E-08 | 46.6 |
| TcMYB10 | AtMYB79   | 33.07 | 127 | 70  | 5 | 10 | 345 | 3   | 122 | 2.00E-08 | 46.6 |
| TcMYB10 | ATMYB71   | 33.62 | 116 | 62  | 5 | 10 | 312 | 15  | 123 | 2.00E-08 | 46.6 |
| TcMYB10 | ATMYB2    | 27.71 | 166 | 99  | 6 | 49 | 483 | 24  | 188 | 2.00E-08 | 46.6 |
| TcMYB10 | ATMYB61   | 27.92 | 197 | 114 | 9 | 52 | 558 | 17  | 204 | 6.00E-08 | 45.8 |
| TcMYB10 | ATMYB106  | 35.14 | 74  | 47  | 1 | 31 | 249 | 53  | 126 | 6.00E-08 | 45.8 |
| TcMYB10 | AtMYB45   | 28.4  | 162 | 83  | 6 | 52 | 438 | 23  | 183 | 7.00E-08 | 45.1 |
| TcMYB10 | AtMYB103  | 27.16 | 162 | 99  | 6 | 52 | 480 | 17  | 175 | 8.00E-08 | 45.4 |
| TcMYB10 | AtMYB98   | 32.56 | 86  | 56  | 1 | 7  | 258 | 203 | 288 | 8.00E-08 | 45.4 |
| TcMYB10 | AtMYB53   | 33.9  | 118 | 62  | 6 | 10 | 315 | 9   | 119 | 9.00E-08 | 45.1 |
| TcMYB10 | ATMYB88   | 38.46 | 52  | 32  | 0 | 46 | 201 | 31  | 82  | 9.00E-08 | 45.4 |
| TcMYB10 | AtMYB116  | 28.46 | 123 | 73  | 4 | 13 | 336 | 10  | 131 | 1.00E-07 | 44.7 |
| TcMYB10 | ATMYB16   | 36.76 | 68  | 42  | 1 | 49 | 249 | 16  | 83  | 1.00E-07 | 44.7 |
| TcMYB10 | ATMYB46   | 29.03 | 155 | 92  | 6 | 52 | 462 | 23  | 174 | 1.00E-07 | 44.3 |
| TcMYB10 | AtMYB64   | 22.86 | 175 | 121 | 4 | 52 | 534 | 108 | 275 | 1.00E-07 | 44.7 |
| TcMYB10 | ATMYB119  | 40    | 50  | 30  | 0 | 52 | 201 | 108 | 157 | 2.00E-07 | 44.7 |
| TcMYB10 | AtMYB82   | 37.62 | 101 | 47  | 5 | 52 | 306 | 17  | 116 | 2.00E-07 | 43.5 |
| TcMYB10 | ATMYB14   | 25.79 | 159 | 100 | 6 | 49 | 471 | 16  | 171 | 2.00E-07 | 43.5 |
| TcMYB10 | AtMYB51   | 25.68 | 183 | 122 | 7 | 4  | 510 | 8   | 176 | 2.00E-07 | 43.9 |
| TcMYB10 | AtMYB93   | 34.57 | 81  | 52  | 2 | 10 | 249 | 9   | 83  | 2.00E-07 | 43.9 |
| TcMYB10 | ATMYB91   | 25.97 | 231 | 138 | 7 | 52 | 645 | 7   | 232 | 2.00E-07 | 43.9 |
| TcMYB10 | ATMYB87   | 32.73 | 110 | 60  | 4 | 49 | 336 | 16  | 124 | 3.00E-07 | 43.5 |
| TcMYB10 | AtMYB10   | 26.09 | 138 | 86  | 4 | 49 | 414 | 18  | 154 | 3.00E-07 | 43.1 |
| TcMYB10 | ATMYB92   | 34.48 | 87  | 53  | 3 | 31 | 279 | 10  | 95  | 3.00E-07 | 43.5 |
| TcMYB10 | AtMYB24   | 27.66 | 141 | 86  | 4 | 10 | 384 | 5   | 143 | 3.00E-07 | 42.7 |
| TcMYB10 | ATMYB118  | 33.33 | 78  | 50  | 1 | 52 | 279 | 192 | 269 | 4.00E-07 | 43.5 |
| TcMYB10 | AtMYB27   | 32.26 | 93  | 49  | 3 | 49 | 285 | 13  | 104 | 4.00E-07 | 42.7 |
| TcMYB10 | AtMYB17   | 31.88 | 69  | 45  | 2 | 49 | 249 | 16  | 83  | 5.00E-07 | 42.7 |
| TcMYB10 | AtMYB124  | 36.54 | 52  | 33  | 0 | 46 | 201 | 26  | 77  | 6.00E-07 | 42.7 |
| TcMYB10 | ATMYB72   | 31.03 | 116 | 64  | 5 | 49 | 348 | 18  | 129 | 6.00E-07 | 42.4 |
| TcMYB10 | ATMYB12   | 28.8  | 125 | 67  | 5 | 52 | 360 | 17  | 139 | 8.00E-07 | 42.4 |
| TcMYB10 | ATMYB58   | 32    | 100 | 53  | 3 | 49 | 303 | 18  | 117 | 8.00E-07 | 42   |
| TcMYB10 | AtMYB104  | 27.72 | 101 | 59  | 3 | 52 | 312 | 21  | 120 | 1.00E-06 | 42   |
| TcMYB10 | AtMYB97   | 28.3  | 106 | 63  | 2 | 7  | 285 | 9   | 114 | 1.00E-06 | 42   |
| TcMYB10 | AtMYB74   | 30.84 | 107 | 61  | 3 | 4  | 285 | 8   | 108 | 1.00E-06 | 41.6 |
| TcMYB10 | ATMYB57   | 25.95 | 131 | 83  | 4 | 49 | 399 | 29  | 158 | 1.00E-06 | 40.8 |
| TcMYB10 | AtMYB36   | 30.53 | 131 | 71  | 8 | 49 | 381 | 16  | 143 | 2.00E-06 | 41.2 |
| TcMYB10 | ATMYB35   | 28.75 | 160 | 77  | 6 | 52 | 420 | 17  | 175 | 2.00E-06 | 40.8 |
| TcMYB10 | AtMYB9    | 30.48 | 105 | 60  | 3 | 10 | 285 | 9   | 107 | 2.00E-06 | 40.8 |
| TcMYB10 | AtMYB62   | 27.93 | 111 | 65  | 4 | 49 | 336 | 23  | 132 | 3.00E-06 | 40.4 |
| TcMYB10 | ATMYB15   | 28.03 | 132 | 75  | 4 | 49 | 384 | 16  | 147 | 4.00E-06 | 40   |
| TcMYB10 | ATMYB110  | 32.31 | 65  | 44  | 0 | 52 | 246 | 70  | 134 | 4.00E-06 | 40   |
| TcMYB10 | ATMYB84   | 32.41 | 108 | 58  | 5 | 49 | 327 | 16  | 121 | 4.00E-06 | 40   |
| TcMYB10 | ATMYB30   | 28.99 | 138 | 78  | 6 | 34 | 387 | 11  | 147 | 4.00E-06 | 40   |
| TcMYB10 | AtMYB6    | 25    | 172 | 115 | 4 | 52 | 525 | 17  | 186 | 4.00E-06 | 39.7 |
| TcMYB10 | ATMYB102  | 31.17 | 77  | 52  | 1 | 31 | 258 | 10  | 86  | 4.00E-06 | 40   |
| TcMYB10 | AtMYB115  | 30.43 | 69  | 48  | 0 | 52 | 258 | 161 | 229 | 4.00E-06 | 40   |
| TcMYB10 | ATMYB34   | 32.94 | 85  | 55  | 3 | 10 | 258 | 9   | 86  | 5.00E-06 | 39.7 |
| TcMYB10 | ATMYB68   | 32.73 | 110 | 57  | 5 | 49 | 327 | 16  | 124 | 6.00E-06 | 39.7 |
| TcMYB10 | ATMYB120  | 28.26 | 92  | 53  | 2 | 49 | 285 | 30  | 121 | 6.00E-06 | 39.7 |
| TcMYB10 | AtMYB76   | 22.16 | 167 | 128 | 4 | 28 | 522 | 9   | 157 | 7.00E-06 | 39.3 |
| TcMYB10 | AtMYB49   | 29.35 | 92  | 52  | 2 | 49 | 285 | 16  | 107 | 9.00E-06 | 38.9 |

|         |          |       |     |     |   |     |     |     |     |          |      |
|---------|----------|-------|-----|-----|---|-----|-----|-----|-----|----------|------|
| TcMYB10 | AtMYB41  | 31.17 | 77  | 52  | 1 | 31  | 258 | 10  | 86  | 1.00E-05 | 38.5 |
| TcMYB10 | AtMYB50  | 31.07 | 103 | 55  | 4 | 52  | 312 | 17  | 118 | 1.00E-05 | 38.5 |
| TcMYB10 | ATMYB78  | 27.5  | 80  | 57  | 1 | 49  | 285 | 30  | 109 | 2.00E-05 | 38.1 |
| TcMYB10 | ATMYB94  | 28.46 | 130 | 78  | 2 | 34  | 378 | 11  | 140 | 2.00E-05 | 38.1 |
| TcMYB10 | ATMYB11  | 30.77 | 91  | 50  | 2 | 52  | 285 | 17  | 107 | 2.00E-05 | 38.1 |
| TcMYB10 | ATMYB28  | 30.38 | 79  | 53  | 2 | 28  | 258 | 9   | 86  | 2.00E-05 | 38.1 |
| TcMYB10 | AtMYB40  | 26.77 | 127 | 77  | 5 | 49  | 381 | 16  | 137 | 2.00E-05 | 37.7 |
| TcMYB10 | AtMYB81  | 29.55 | 88  | 60  | 3 | 49  | 306 | 24  | 105 | 2.00E-05 | 38.1 |
| TcMYB10 | MYB7     | 28.97 | 145 | 86  | 4 | 52  | 435 | 17  | 160 | 2.00E-05 | 37.7 |
| TcMYB10 | ATMYB111 | 30.77 | 91  | 50  | 2 | 52  | 285 | 17  | 107 | 2.00E-05 | 37.7 |
| TcMYB10 | AtMYB85  | 24.34 | 189 | 116 | 7 | 34  | 519 | 11  | 198 | 2.00E-05 | 37.4 |
| TcMYB10 | ATMYB29  | 30.38 | 79  | 53  | 2 | 28  | 258 | 9   | 86  | 3.00E-05 | 37.4 |
| TcMYB10 | ATMYB96  | 28.79 | 132 | 79  | 4 | 34  | 384 | 11  | 135 | 3.00E-05 | 37.4 |
| TcMYB10 | ATMYB13  | 30.69 | 101 | 54  | 4 | 49  | 303 | 16  | 115 | 3.00E-05 | 37   |
| TcMYB10 | AtMYB60  | 25    | 172 | 111 | 5 | 49  | 510 | 16  | 184 | 3.00E-05 | 37   |
| TcMYB10 | ATMYB3   | 28.06 | 139 | 83  | 5 | 52  | 417 | 17  | 150 | 4.00E-05 | 36.6 |
| TcMYB10 | ATMYB123 | 27.1  | 155 | 98  | 5 | 52  | 471 | 19  | 171 | 4.00E-05 | 36.6 |
| TcMYB10 | ATMYB101 | 27.27 | 99  | 59  | 2 | 28  | 285 | 15  | 113 | 5.00E-05 | 37   |
| TcMYB10 | ATMYB31  | 33.93 | 56  | 32  | 2 | 49  | 201 | 16  | 67  | 7.00E-05 | 36.2 |
| TcMYB10 | ATMYB86  | 31    | 100 | 53  | 4 | 52  | 303 | 17  | 115 | 7.00E-05 | 36.2 |
| TcMYB10 | ATMYB5   | 31.52 | 92  | 50  | 2 | 49  | 285 | 27  | 118 | 7.00E-05 | 35.8 |
| TcMYB10 | ATMYB33  | 27.1  | 107 | 65  | 3 | 4   | 285 | 22  | 127 | 8.00E-05 | 36.2 |
| TcMYB10 | ATMYB65  | 27.17 | 92  | 54  | 2 | 49  | 285 | 45  | 136 | 8.00E-05 | 36.2 |
| TcMYB10 | ATMYB38  | 42.55 | 47  | 25  | 2 | 49  | 183 | 16  | 62  | 8.00E-05 | 35.8 |
| TcMYB10 | ATMYB67  | 24.32 | 148 | 95  | 6 | 52  | 444 | 27  | 173 | 9.00E-05 | 35.8 |
| TcMYB10 | AtMYB89  | 37.5  | 40  | 25  | 0 | 52  | 171 | 59  | 98  | 1.00E-04 | 35   |
| TcMYB10 | AtMYB32  | 26.72 | 131 | 75  | 4 | 52  | 381 | 17  | 146 | 1.00E-04 | 35.4 |
| TcMYB10 | ATMYB66  | 28.97 | 107 | 62  | 3 | 7   | 285 | 6   | 111 | 1.00E-04 | 35   |
| TcMYB10 | MYB8     | 27.47 | 91  | 53  | 2 | 52  | 285 | 17  | 107 | 1.00E-04 | 35   |
| TcMYB10 | AtMYB42  | 25.18 | 139 | 76  | 5 | 49  | 381 | 16  | 153 | 2.00E-04 | 34.7 |
| TcMYB10 | AtMYB100 | 27.54 | 69  | 49  | 2 | 43  | 246 | 26  | 93  | 2.00E-04 | 34.3 |
| TcMYB10 | AtMYB20  | 28.1  | 121 | 59  | 6 | 49  | 327 | 16  | 135 | 3.00E-04 | 34.3 |
| TcMYB10 | ATMYB4   | 30.77 | 91  | 50  | 2 | 52  | 285 | 17  | 107 | 3.00E-04 | 33.9 |
| TcMYB10 | ATMYB122 | 29.58 | 71  | 48  | 2 | 52  | 258 | 17  | 86  | 4.00E-04 | 33.9 |
| TcMYB10 | ATMYB26  | 29.09 | 110 | 54  | 4 | 52  | 309 | 17  | 126 | 4.00E-04 | 33.9 |
| TcMYB10 | AtMYB83  | 31.31 | 99  | 53  | 3 | 52  | 303 | 35  | 133 | 7.00E-04 | 33.1 |
| TcMYB11 | ATMYB118 | 39.22 | 204 | 103 | 2 | 229 | 777 | 187 | 390 | 2.00E-43 | 154  |
| TcMYB11 | ATMYB118 | 37.04 | 108 | 66  | 2 | 49  | 366 | 177 | 283 | 2.00E-18 | 80.9 |
| TcMYB11 | AtMYB98  | 45.64 | 149 | 80  | 1 | 94  | 537 | 169 | 317 | 3.00E-43 | 154  |
| TcMYB11 | AtMYB98  | 37.86 | 103 | 62  | 2 | 64  | 366 | 210 | 311 | 5.00E-18 | 79.3 |
| TcMYB11 | ATMYB119 | 46.75 | 154 | 75  | 2 | 208 | 648 | 96  | 247 | 4.00E-41 | 148  |
| TcMYB11 | ATMYB119 | 38.54 | 96  | 59  | 1 | 79  | 366 | 105 | 199 | 8.00E-16 | 72.4 |
| TcMYB11 | AtMYB64  | 51.69 | 118 | 57  | 0 | 184 | 537 | 88  | 205 | 8.00E-40 | 144  |
| TcMYB11 | AtMYB64  | 34.31 | 102 | 67  | 1 | 61  | 366 | 99  | 199 | 1.00E-14 | 68.9 |
| TcMYB11 | AtMYB1   | 47.59 | 145 | 75  | 1 | 232 | 663 | 54  | 198 | 5.00E-39 | 141  |
| TcMYB11 | AtMYB1   | 37.27 | 110 | 69  | 1 | 46  | 375 | 44  | 152 | 9.00E-18 | 78.2 |
| TcMYB11 | ATMYB73  | 54.72 | 106 | 48  | 0 | 220 | 537 | 8   | 113 | 7.00E-38 | 136  |
| TcMYB11 | ATMYB73  | 35.14 | 111 | 69  | 2 | 52  | 375 | 1   | 110 | 5.00E-17 | 75.1 |
| TcMYB11 | AtMYB115 | 56.73 | 104 | 45  | 1 | 235 | 546 | 158 | 260 | 1.00E-37 | 136  |
| TcMYB11 | AtMYB115 | 41.67 | 96  | 56  | 1 | 79  | 366 | 158 | 252 | 2.00E-19 | 82.8 |
| TcMYB11 | AtMYB70  | 54.9  | 102 | 46  | 0 | 232 | 537 | 12  | 113 | 3.00E-36 | 131  |
| TcMYB11 | AtMYB70  | 34.23 | 111 | 70  | 2 | 52  | 375 | 1   | 110 | 1.00E-15 | 70.9 |
| TcMYB11 | ATMYB44  | 50.94 | 106 | 52  | 0 | 232 | 549 | 5   | 110 | 2.00E-35 | 129  |
| TcMYB11 | ATMYB44  | 37.37 | 99  | 62  | 1 | 79  | 375 | 6   | 103 | 1.00E-16 | 73.6 |
| TcMYB11 | ATMYB77  | 40.28 | 144 | 86  | 1 | 232 | 663 | 5   | 147 | 6.00E-35 | 127  |
| TcMYB11 | ATMYB77  | 38.38 | 99  | 61  | 1 | 79  | 375 | 6   | 103 | 4.00E-17 | 75.1 |
| TcMYB11 | AtMYB109 | 51.96 | 102 | 49  | 0 | 232 | 537 | 55  | 156 | 4.00E-34 | 127  |
| TcMYB11 | AtMYB109 | 36.45 | 107 | 68  | 1 | 55  | 375 | 48  | 153 | 9.00E-16 | 72   |
| TcMYB11 | ATMYB25  | 49.02 | 102 | 52  | 0 | 232 | 537 | 49  | 150 | 6.00E-33 | 123  |
| TcMYB11 | ATMYB25  | 35.59 | 118 | 76  | 2 | 22  | 375 | 33  | 147 | 1.00E-15 | 71.6 |
| TcMYB11 | ATMYB54  | 52.63 | 95  | 45  | 0 | 235 | 519 | 6   | 100 | 7.00E-33 | 119  |
| TcMYB11 | ATMYB54  | 36.08 | 97  | 62  | 1 | 76  | 366 | 5   | 100 | 4.00E-17 | 73.9 |
| TcMYB11 | AtMYB100 | 48.54 | 103 | 53  | 0 | 226 | 534 | 23  | 125 | 1.00E-32 | 119  |
| TcMYB11 | AtMYB100 | 33.03 | 109 | 73  | 1 | 79  | 405 | 26  | 133 | 6.00E-15 | 67.4 |
| TcMYB11 | ATMYB52  | 51.58 | 95  | 46  | 0 | 235 | 519 | 5   | 99  | 3.00E-32 | 118  |
| TcMYB11 | ATMYB52  | 37.11 | 97  | 61  | 1 | 76  | 366 | 4   | 99  | 1.00E-17 | 75.9 |
| TcMYB11 | ATMYB52  | 36    | 50  | 32  | 1 | 70  | 219 | 54  | 102 | 5.00E-04 | 34.7 |
| TcMYB11 | AtMYB53  | 32.91 | 234 | 147 | 6 | 229 | 900 | 12  | 238 | 3.00E-32 | 119  |
| TcMYB11 | AtMYB53  | 34    | 100 | 65  | 2 | 79  | 375 | 14  | 112 | 2.00E-13 | 63.9 |
| TcMYB11 | AtMYB49  | 50.94 | 106 | 51  | 1 | 226 | 540 | 11  | 116 | 7.00E-32 | 119  |
| TcMYB11 | AtMYB49  | 36    | 100 | 63  | 2 | 79  | 375 | 14  | 112 | 4.00E-15 | 69.3 |
| TcMYB11 | AtMYB56  | 38.82 | 170 | 104 | 2 | 235 | 744 | 93  | 255 | 1.00E-31 | 118  |
| TcMYB11 | AtMYB56  | 31.19 | 109 | 75  | 1 | 40  | 366 | 80  | 187 | 2.00E-14 | 67   |
| TcMYB11 | AtMYB117 | 50.5  | 101 | 50  | 0 | 235 | 537 | 98  | 198 | 1.00E-31 | 119  |
| TcMYB11 | AtMYB117 | 32.29 | 96  | 65  | 1 | 79  | 366 | 98  | 192 | 4.00E-14 | 66.6 |
| TcMYB11 | AtMYB117 | 36    | 50  | 32  | 1 | 70  | 219 | 147 | 195 | 3.00E-04 | 35.8 |
| TcMYB11 | ATMYB105 | 50.5  | 101 | 50  | 0 | 235 | 537 | 107 | 207 | 2.00E-31 | 118  |
| TcMYB11 | ATMYB105 | 32.99 | 97  | 65  | 1 | 76  | 366 | 106 | 201 | 1.00E-14 | 68.2 |
| TcMYB11 | ATMYB105 | 34    | 50  | 33  | 1 | 70  | 219 | 156 | 204 | 3.00E-04 | 35.4 |
| TcMYB11 | ATMYB69  | 44.44 | 117 | 64  | 1 | 223 | 570 | 15  | 131 | 2.00E-31 | 115  |

|         |          |       |     |     |   |     |     |    |     |          |      |
|---------|----------|-------|-----|-----|---|-----|-----|----|-----|----------|------|
| TcMYB11 | ATMYB69  | 33.33 | 96  | 64  | 1 | 79  | 366 | 19 | 113 | 1.00E-15 | 70.1 |
| TcMYB11 | AtMYB107 | 49.52 | 105 | 52  | 1 | 229 | 540 | 12 | 116 | 3.00E-31 | 117  |
| TcMYB11 | AtMYB107 | 34    | 100 | 65  | 2 | 79  | 375 | 14 | 112 | 2.00E-14 | 67.4 |
| TcMYB11 | AtMYB9   | 48.57 | 105 | 53  | 1 | 229 | 540 | 12 | 116 | 6.00E-31 | 116  |
| TcMYB11 | AtMYB9   | 36    | 100 | 63  | 2 | 79  | 375 | 14 | 112 | 8.00E-15 | 68.6 |
| TcMYB11 | ATMYB0   | 44.26 | 122 | 67  | 1 | 220 | 582 | 11 | 132 | 7.00E-31 | 113  |
| TcMYB11 | ATMYB0   | 32.5  | 120 | 80  | 2 | 40  | 396 | 3  | 121 | 8.00E-14 | 63.9 |
| TcMYB11 | AtMYB41  | 48.54 | 103 | 52  | 1 | 235 | 540 | 14 | 116 | 7.00E-31 | 115  |
| TcMYB11 | AtMYB41  | 34    | 100 | 65  | 2 | 79  | 375 | 14 | 112 | 5.00E-14 | 65.5 |
| TcMYB11 | ATMYB15  | 49.07 | 108 | 54  | 1 | 229 | 549 | 12 | 119 | 7.00E-31 | 115  |
| TcMYB11 | ATMYB15  | 36    | 100 | 63  | 2 | 79  | 375 | 14 | 112 | 3.00E-15 | 69.3 |
| TcMYB11 | ATMYB65  | 44.72 | 123 | 67  | 2 | 172 | 537 | 25 | 144 | 8.00E-31 | 119  |
| TcMYB11 | ATMYB33  | 44.26 | 122 | 67  | 2 | 175 | 537 | 17 | 135 | 9.00E-31 | 119  |
| TcMYB11 | ATMYB67  | 50.96 | 104 | 49  | 2 | 235 | 540 | 24 | 126 | 9.00E-31 | 115  |
| TcMYB11 | ATMYB67  | 33.67 | 98  | 64  | 2 | 79  | 369 | 24 | 120 | 2.00E-13 | 64.3 |
| TcMYB11 | AtMYB93  | 30.26 | 228 | 150 | 4 | 229 | 885 | 12 | 239 | 1.00E-30 | 116  |
| TcMYB11 | AtMYB93  | 34    | 100 | 65  | 2 | 79  | 375 | 14 | 112 | 2.00E-13 | 64.3 |
| TcMYB11 | ATMYB35  | 33.94 | 221 | 139 | 5 | 235 | 876 | 14 | 222 | 1.00E-30 | 115  |
| TcMYB11 | ATMYB35  | 31.13 | 106 | 72  | 2 | 79  | 393 | 14 | 118 | 1.00E-10 | 55.5 |
| TcMYB11 | AtMYB74  | 49.52 | 105 | 52  | 1 | 229 | 540 | 13 | 117 | 1.00E-30 | 115  |
| TcMYB11 | AtMYB74  | 33.96 | 106 | 69  | 2 | 79  | 393 | 15 | 119 | 7.00E-15 | 68.6 |
| TcMYB11 | ATMYB23  | 40.28 | 144 | 80  | 3 | 226 | 639 | 11 | 151 | 1.00E-30 | 112  |
| TcMYB11 | ATMYB23  | 35.19 | 108 | 69  | 2 | 58  | 378 | 7  | 113 | 1.00E-15 | 68.9 |
| TcMYB11 | ATMYB110 | 49.02 | 102 | 52  | 0 | 235 | 540 | 67 | 168 | 2.00E-30 | 114  |
| TcMYB11 | ATMYB110 | 32.67 | 101 | 68  | 1 | 64  | 366 | 62 | 161 | 1.00E-12 | 61.6 |
| TcMYB11 | ATMYB95  | 48.57 | 105 | 53  | 1 | 229 | 540 | 12 | 116 | 2.00E-30 | 113  |
| TcMYB11 | ATMYB95  | 30    | 110 | 72  | 3 | 79  | 393 | 14 | 118 | 1.00E-09 | 52.4 |
| TcMYB11 | ATMYB66  | 35.68 | 185 | 111 | 5 | 220 | 750 | 13 | 194 | 2.00E-30 | 111  |
| TcMYB11 | ATMYB66  | 35.4  | 113 | 71  | 3 | 79  | 411 | 18 | 129 | 2.00E-16 | 70.9 |
| TcMYB11 | ATMYB92  | 50    | 106 | 51  | 2 | 229 | 540 | 12 | 116 | 4.00E-30 | 114  |
| TcMYB11 | ATMYB92  | 35    | 100 | 64  | 2 | 79  | 375 | 14 | 112 | 1.00E-14 | 67.8 |
| TcMYB11 | ATMYB2   | 46.08 | 102 | 54  | 1 | 235 | 537 | 22 | 123 | 4.00E-30 | 112  |
| TcMYB11 | ATMYB2   | 35    | 100 | 64  | 2 | 79  | 375 | 22 | 120 | 4.00E-11 | 56.6 |
| TcMYB11 | AtMYB10  | 33.15 | 184 | 121 | 3 | 235 | 780 | 16 | 193 | 4.00E-30 | 111  |
| TcMYB11 | AtMYB10  | 33.96 | 106 | 69  | 2 | 79  | 393 | 16 | 120 | 7.00E-15 | 67.4 |
| TcMYB11 | ATMYB102 | 49.52 | 105 | 52  | 1 | 229 | 540 | 12 | 116 | 5.00E-30 | 114  |
| TcMYB11 | ATMYB102 | 35    | 100 | 64  | 2 | 79  | 375 | 14 | 112 | 1.00E-13 | 65.1 |
| TcMYB11 | ATMYB121 | 47.62 | 105 | 54  | 1 | 235 | 546 | 29 | 133 | 7.00E-30 | 112  |
| TcMYB11 | ATMYB121 | 36.36 | 99  | 62  | 2 | 79  | 372 | 29 | 126 | 9.00E-13 | 61.6 |
| TcMYB11 | MYB8     | 45.63 | 103 | 55  | 1 | 235 | 540 | 14 | 116 | 1.00E-29 | 109  |
| TcMYB11 | MYB8     | 33.66 | 101 | 66  | 2 | 76  | 375 | 13 | 112 | 1.00E-12 | 60.5 |
| TcMYB11 | AtMYB24  | 37.68 | 138 | 84  | 2 | 226 | 633 | 16 | 153 | 1.00E-29 | 109  |
| TcMYB11 | AtMYB24  | 30.99 | 71  | 49  | 1 | 79  | 291 | 72 | 141 | 9.00E-06 | 39.7 |
| TcMYB11 | AtMYB81  | 49.5  | 101 | 50  | 1 | 235 | 534 | 22 | 122 | 3.00E-29 | 113  |
| TcMYB11 | AtMYB81  | 31.68 | 101 | 68  | 2 | 76  | 375 | 21 | 120 | 1.00E-10 | 55.8 |
| TcMYB11 | AtMYB51  | 47.62 | 105 | 54  | 1 | 229 | 540 | 13 | 117 | 3.00E-29 | 112  |
| TcMYB11 | AtMYB51  | 35.85 | 106 | 67  | 2 | 79  | 393 | 15 | 119 | 2.00E-16 | 73.9 |
| TcMYB11 | ATMYB72  | 39.31 | 145 | 85  | 4 | 235 | 660 | 16 | 148 | 4.00E-29 | 110  |
| TcMYB11 | ATMYB72  | 32    | 100 | 67  | 2 | 79  | 375 | 16 | 114 | 1.00E-12 | 61.6 |
| TcMYB11 | ATMYB5   | 37.42 | 155 | 94  | 4 | 235 | 690 | 25 | 169 | 5.00E-29 | 108  |
| TcMYB11 | ATMYB5   | 30.77 | 104 | 67  | 3 | 79  | 375 | 25 | 123 | 1.00E-10 | 55.1 |
| TcMYB11 | AtMYB22  | 43.69 | 103 | 58  | 1 | 226 | 534 | 51 | 152 | 5.00E-29 | 108  |
| TcMYB11 | AtMYB22  | 34.55 | 110 | 72  | 2 | 76  | 405 | 53 | 160 | 1.00E-15 | 70.1 |
| TcMYB11 | AtMYB6   | 46.23 | 106 | 56  | 1 | 235 | 549 | 14 | 119 | 6.00E-29 | 108  |
| TcMYB11 | AtMYB6   | 33.33 | 102 | 67  | 2 | 73  | 375 | 12 | 112 | 6.00E-13 | 61.6 |
| TcMYB11 | ATMYB3   | 46.6  | 103 | 54  | 1 | 235 | 540 | 14 | 116 | 7.00E-29 | 108  |
| TcMYB11 | ATMYB3   | 35.64 | 101 | 64  | 2 | 76  | 375 | 13 | 112 | 2.00E-14 | 66.6 |
| TcMYB11 | AtMYB112 | 36.51 | 126 | 79  | 1 | 208 | 582 | 25 | 150 | 1.00E-28 | 107  |
| TcMYB11 | ATMYB86  | 48.6  | 107 | 53  | 2 | 226 | 540 | 11 | 116 | 1.00E-28 | 110  |
| TcMYB11 | ATMYB86  | 31.13 | 106 | 72  | 2 | 79  | 393 | 14 | 118 | 1.00E-11 | 58.9 |
| TcMYB11 | AtMYB40  | 30.63 | 222 | 148 | 5 | 229 | 876 | 12 | 229 | 1.00E-28 | 108  |
| TcMYB11 | AtMYB40  | 32.2  | 118 | 67  | 6 | 79  | 393 | 14 | 127 | 3.00E-09 | 50.8 |
| TcMYB11 | ATMYB61  | 49.53 | 107 | 52  | 2 | 226 | 540 | 11 | 116 | 1.00E-28 | 110  |
| TcMYB11 | ATMYB61  | 32.08 | 106 | 71  | 2 | 79  | 393 | 14 | 118 | 1.00E-11 | 58.9 |
| TcMYB11 | ATMYB101 | 50    | 104 | 51  | 1 | 229 | 537 | 18 | 121 | 1.00E-28 | 112  |
| TcMYB11 | ATMYB101 | 30.77 | 104 | 71  | 2 | 67  | 375 | 16 | 118 | 5.00E-10 | 54.3 |
| TcMYB11 | AtMYB50  | 47.66 | 107 | 54  | 2 | 226 | 540 | 11 | 116 | 1.00E-28 | 109  |
| TcMYB11 | AtMYB50  | 33.02 | 106 | 70  | 2 | 79  | 393 | 14 | 118 | 7.00E-12 | 59.3 |
| TcMYB11 | ATMYB123 | 45.95 | 111 | 58  | 2 | 214 | 540 | 9  | 118 | 2.00E-28 | 107  |
| TcMYB11 | ATMYB123 | 29.91 | 107 | 74  | 2 | 76  | 393 | 15 | 120 | 1.00E-11 | 58.2 |
| TcMYB11 | ATMYB120 | 49.52 | 105 | 52  | 1 | 229 | 540 | 26 | 130 | 2.00E-28 | 112  |
| TcMYB11 | ATMYB120 | 32.2  | 118 | 72  | 3 | 46  | 375 | 10 | 126 | 6.00E-11 | 57.4 |
| TcMYB11 | AtMYB27  | 43.52 | 108 | 59  | 2 | 229 | 546 | 9  | 115 | 2.00E-28 | 106  |
| TcMYB11 | AtMYB27  | 35.35 | 99  | 63  | 2 | 79  | 372 | 11 | 108 | 1.00E-14 | 66.6 |
| TcMYB11 | AtMYB47  | 46.6  | 103 | 54  | 1 | 235 | 540 | 14 | 116 | 2.00E-28 | 107  |
| TcMYB11 | AtMYB47  | 28.18 | 110 | 74  | 3 | 79  | 393 | 14 | 118 | 5.00E-10 | 53.1 |
| TcMYB11 | AtMYB20  | 34.1  | 217 | 125 | 9 | 229 | 825 | 12 | 223 | 2.00E-28 | 107  |
| TcMYB11 | AtMYB20  | 29.25 | 106 | 74  | 2 | 79  | 393 | 14 | 118 | 2.00E-11 | 57.8 |
| TcMYB11 | ATMYB26  | 43.48 | 115 | 55  | 1 | 235 | 549 | 14 | 128 | 2.00E-28 | 109  |
| TcMYB11 | ATMYB26  | 28.32 | 113 | 71  | 2 | 67  | 375 | 10 | 121 | 4.00E-11 | 57.4 |

|         |           |       |     |     |   |     |      |    |     |          |      |
|---------|-----------|-------|-----|-----|---|-----|------|----|-----|----------|------|
| TcMYB11 | AtMYB97   | 48.54 | 103 | 52  | 1 | 229 | 534  | 19 | 121 | 2.00E-28 | 110  |
| TcMYB11 | AtMYB97   | 26.83 | 205 | 135 | 7 | 79  | 648  | 21 | 215 | 5.00E-13 | 63.5 |
| TcMYB11 | AtMYB17   | 50    | 106 | 51  | 2 | 229 | 540  | 12 | 116 | 2.00E-28 | 108  |
| TcMYB11 | AtMYB17   | 35.29 | 102 | 63  | 3 | 79  | 375  | 14 | 112 | 3.00E-14 | 66.6 |
| TcMYB11 | ATMYB46   | 48.54 | 103 | 52  | 1 | 235 | 540  | 20 | 122 | 3.00E-28 | 107  |
| TcMYB11 | ATMYB46   | 28.18 | 110 | 78  | 2 | 67  | 393  | 16 | 124 | 7.00E-11 | 55.8 |
| TcMYB11 | AtMYB85   | 34.5  | 200 | 129 | 6 | 235 | 828  | 14 | 190 | 3.00E-28 | 107  |
| TcMYB11 | AtMYB85   | 30.19 | 106 | 73  | 2 | 79  | 393  | 14 | 118 | 2.00E-11 | 57.8 |
| TcMYB11 | AtMYB32   | 44.66 | 103 | 56  | 1 | 235 | 540  | 14 | 116 | 4.00E-28 | 107  |
| TcMYB11 | AtMYB32   | 34.31 | 102 | 66  | 2 | 73  | 375  | 12 | 112 | 6.00E-14 | 65.1 |
| TcMYB11 | ATMYB71   | 34.27 | 178 | 106 | 4 | 235 | 735  | 20 | 196 | 4.00E-28 | 106  |
| TcMYB11 | ATMYB71   | 36.36 | 99  | 62  | 2 | 79  | 372  | 20 | 117 | 1.00E-13 | 63.9 |
| TcMYB11 | ATMYB122  | 46.67 | 105 | 55  | 1 | 229 | 540  | 12 | 116 | 4.00E-28 | 108  |
| TcMYB11 | ATMYB122  | 32.73 | 110 | 69  | 3 | 79  | 393  | 14 | 118 | 3.00E-15 | 69.7 |
| TcMYB11 | ATMYB4    | 47.57 | 103 | 53  | 1 | 235 | 540  | 14 | 116 | 6.00E-28 | 106  |
| TcMYB11 | ATMYB4    | 36.27 | 102 | 64  | 2 | 73  | 375  | 12 | 112 | 1.00E-14 | 67.4 |
| TcMYB11 | MYB7      | 46.6  | 103 | 54  | 1 | 235 | 540  | 14 | 116 | 6.00E-28 | 106  |
| TcMYB11 | MYB7      | 35.64 | 101 | 64  | 2 | 76  | 375  | 13 | 112 | 8.00E-14 | 64.7 |
| TcMYB11 | ATMYB13   | 47.17 | 106 | 54  | 2 | 229 | 540  | 12 | 116 | 9.00E-28 | 105  |
| TcMYB11 | ATMYB13   | 32.71 | 107 | 69  | 3 | 79  | 390  | 14 | 117 | 1.00E-13 | 63.5 |
| TcMYB11 | ATMYB59-3 | 41.82 | 110 | 63  | 1 | 211 | 537  | 2  | 111 | 1.00E-27 | 104  |
| TcMYB11 | ATMYB59-3 | 35    | 100 | 64  | 2 | 79  | 375  | 10 | 108 | 1.00E-14 | 66.6 |
| TcMYB11 | AtMYB60   | 47.12 | 104 | 54  | 1 | 235 | 543  | 14 | 117 | 1.00E-27 | 105  |
| TcMYB11 | AtMYB60   | 32.37 | 139 | 86  | 5 | 34  | 426  | 4  | 132 | 2.00E-13 | 63.5 |
| TcMYB11 | ATMYB3    | 44.23 | 104 | 57  | 1 | 226 | 534  | 19 | 122 | 1.00E-27 | 103  |
| TcMYB11 | ATMYB3    | 33.96 | 106 | 69  | 2 | 79  | 393  | 22 | 126 | 1.00E-11 | 57.8 |
| TcMYB11 | ATMYB58   | 41.9  | 105 | 60  | 1 | 235 | 546  | 16 | 120 | 2.00E-27 | 105  |
| TcMYB11 | ATMYB58   | 24.27 | 239 | 177 | 8 | 79  | 783  | 16 | 230 | 5.00E-13 | 62.4 |
| TcMYB11 | AtMYB79   | 46.6  | 103 | 53  | 2 | 235 | 537  | 8  | 109 | 2.00E-27 | 104  |
| TcMYB11 | AtMYB79   | 34.34 | 99  | 64  | 2 | 79  | 372  | 8  | 105 | 3.00E-13 | 62.8 |
| TcMYB11 | ATMYB31   | 46.23 | 106 | 56  | 1 | 226 | 540  | 11 | 116 | 2.00E-27 | 106  |
| TcMYB11 | ATMYB31   | 34    | 100 | 65  | 2 | 79  | 375  | 14 | 112 | 2.00E-11 | 58.2 |
| TcMYB11 | AtMYB89   | 46.46 | 99  | 53  | 0 | 238 | 534  | 57 | 155 | 3.00E-27 | 102  |
| TcMYB11 | AtMYB89   | 30.46 | 151 | 104 | 3 | 37  | 486  | 41 | 182 | 2.00E-16 | 70.9 |
| TcMYB11 | AtMYB42   | 33.82 | 204 | 133 | 6 | 235 | 840  | 14 | 189 | 3.00E-27 | 104  |
| TcMYB11 | AtMYB42   | 25.3  | 166 | 107 | 3 | 79  | 525  | 14 | 178 | 3.00E-11 | 57   |
| TcMYB11 | ATMYB80   | 42.72 | 103 | 58  | 1 | 235 | 540  | 14 | 116 | 3.00E-27 | 105  |
| TcMYB11 | ATMYB80   | 30.48 | 105 | 72  | 2 | 79  | 390  | 14 | 117 | 7.00E-11 | 56.2 |
| TcMYB11 | ATMYB30   | 46.15 | 104 | 55  | 1 | 235 | 543  | 14 | 117 | 3.00E-27 | 105  |
| TcMYB11 | ATMYB30   | 33.64 | 110 | 68  | 3 | 79  | 393  | 14 | 118 | 1.00E-12 | 61.6 |
| TcMYB11 | AtMYB103  | 46.6  | 103 | 54  | 1 | 235 | 540  | 14 | 116 | 4.00E-27 | 106  |
| TcMYB11 | AtMYB103  | 30.36 | 112 | 75  | 3 | 67  | 393  | 10 | 118 | 4.00E-12 | 60.5 |
| TcMYB11 | ATMYB106  | 28.81 | 295 | 205 | 7 | 229 | 1098 | 55 | 341 | 5.00E-27 | 106  |
| TcMYB11 | ATMYB106  | 33.02 | 106 | 70  | 2 | 79  | 393  | 57 | 161 | 6.00E-14 | 66.2 |
| TcMYB11 | AtMYB45   | 46.53 | 101 | 53  | 1 | 235 | 534  | 20 | 120 | 6.00E-27 | 103  |
| TcMYB11 | AtMYB45   | 35.51 | 107 | 68  | 2 | 70  | 387  | 17 | 122 | 4.00E-14 | 65.5 |
| TcMYB11 | AtMYB83   | 44.86 | 107 | 58  | 1 | 223 | 540  | 28 | 134 | 6.00E-27 | 105  |
| TcMYB11 | AtMYB83   | 31.48 | 108 | 73  | 2 | 79  | 399  | 32 | 138 | 3.00E-10 | 54.3 |
| TcMYB11 | AtMYB43   | 48.11 | 106 | 53  | 2 | 229 | 540  | 12 | 116 | 6.00E-27 | 104  |
| TcMYB11 | AtMYB43   | 29.25 | 106 | 74  | 2 | 79  | 393  | 14 | 118 | 1.00E-10 | 55.8 |
| TcMYB11 | ATMYB63   | 43.69 | 103 | 57  | 1 | 235 | 540  | 16 | 118 | 6.00E-27 | 103  |
| TcMYB11 | ATMYB63   | 35.4  | 113 | 72  | 2 | 79  | 414  | 16 | 127 | 5.00E-18 | 77.8 |
| TcMYB11 | ATMYB63   | 33.33 | 63  | 42  | 1 | 79  | 267  | 69 | 130 | 6.00E-05 | 37.7 |
| TcMYB11 | ATMYB96   | 28.2  | 266 | 187 | 7 | 235 | 1020 | 14 | 264 | 7.00E-27 | 105  |
| TcMYB11 | ATMYB96   | 31.78 | 129 | 87  | 3 | 34  | 417  | 4  | 126 | 7.00E-13 | 62.8 |
| TcMYB11 | ATMYB96   | 26.92 | 104 | 76  | 2 | 79  | 390  | 67 | 158 | 2.00E-05 | 39.3 |
| TcMYB11 | AtMYB116  | 34.03 | 144 | 92  | 2 | 235 | 657  | 20 | 163 | 7.00E-27 | 103  |
| TcMYB11 | AtMYB116  | 24.08 | 245 | 175 | 7 | 79  | 780  | 20 | 257 | 4.00E-11 | 56.6 |
| TcMYB11 | AtMYB62   | 30.65 | 186 | 124 | 4 | 226 | 768  | 18 | 186 | 7.00E-27 | 103  |
| TcMYB11 | ATMYB16   | 42.86 | 105 | 59  | 1 | 229 | 540  | 12 | 116 | 8.00E-27 | 104  |
| TcMYB11 | ATMYB16   | 32.08 | 106 | 71  | 2 | 79  | 393  | 14 | 118 | 2.00E-13 | 63.9 |
| TcMYB11 | ATMYB14   | 42.99 | 107 | 60  | 1 | 235 | 552  | 14 | 120 | 8.00E-27 | 102  |
| TcMYB11 | ATMYB14   | 32.71 | 107 | 71  | 2 | 79  | 396  | 14 | 119 | 2.00E-16 | 72.4 |
| TcMYB11 | ATMYB94   | 41.41 | 128 | 67  | 3 | 235 | 594  | 14 | 139 | 9.00E-27 | 104  |
| TcMYB11 | ATMYB94   | 31.4  | 121 | 82  | 3 | 34  | 393  | 4  | 118 | 5.00E-12 | 60.1 |
| TcMYB11 | ATMYB48   | 44.12 | 102 | 56  | 1 | 235 | 537  | 9  | 110 | 1.00E-26 | 102  |
| TcMYB11 | ATMYB48   | 36    | 100 | 63  | 2 | 79  | 375  | 9  | 107 | 1.00E-14 | 67   |
| TcMYB11 | ATMYB57   | 43.69 | 103 | 57  | 1 | 235 | 540  | 27 | 129 | 1.00E-26 | 100  |
| TcMYB11 | ATMYB34   | 41.44 | 111 | 64  | 1 | 235 | 564  | 14 | 124 | 2.00E-26 | 102  |
| TcMYB11 | ATMYB34   | 32.08 | 106 | 71  | 2 | 79  | 393  | 14 | 118 | 2.00E-13 | 63.9 |
| TcMYB11 | AtMYB108  | 31.14 | 167 | 114 | 2 | 226 | 723  | 18 | 182 | 3.00E-26 | 102  |
| TcMYB11 | ATMYB55   | 40.68 | 118 | 57  | 1 | 226 | 540  | 11 | 128 | 4.00E-26 | 102  |
| TcMYB11 | ATMYB55   | 31.25 | 112 | 64  | 2 | 79  | 375  | 14 | 124 | 2.00E-11 | 58.2 |
| TcMYB11 | ATMYB28   | 38.85 | 139 | 84  | 2 | 229 | 642  | 12 | 149 | 5.00E-26 | 102  |
| TcMYB11 | ATMYB28   | 34    | 100 | 65  | 2 | 79  | 375  | 14 | 112 | 2.00E-12 | 61.6 |
| TcMYB11 | AtMYB18   | 45.1  | 102 | 55  | 1 | 235 | 537  | 12 | 113 | 8.00E-26 | 100  |
| TcMYB11 | AtMYB18   | 27.07 | 229 | 131 | 6 | 70  | 648  | 9  | 231 | 2.00E-14 | 67   |
| TcMYB11 | AtMYB76   | 43.81 | 105 | 58  | 1 | 229 | 540  | 12 | 116 | 1.00E-25 | 100  |
| TcMYB11 | AtMYB76   | 32.71 | 107 | 71  | 2 | 79  | 396  | 14 | 119 | 1.00E-12 | 61.6 |
| TcMYB11 | ATMYB29   | 44.76 | 105 | 57  | 1 | 229 | 540  | 12 | 116 | 2.00E-25 | 100  |

|         |          |       |     |     |    |     |      |     |     |          |      |
|---------|----------|-------|-----|-----|----|-----|------|-----|-----|----------|------|
| TcMYB11 | ATMYB29  | 33    | 100 | 66  | 2  | 79  | 375  | 14  | 112 | 8.00E-12 | 59.3 |
| TcMYB11 | AtMYB19  | 36.18 | 152 | 93  | 4  | 235 | 678  | 14  | 161 | 4.00E-25 | 98.2 |
| TcMYB11 | AtMYB19  | 33.61 | 119 | 78  | 3  | 61  | 414  | 8   | 120 | 2.00E-15 | 69.3 |
| TcMYB11 | AtMYB19  | 28.36 | 67  | 47  | 2  | 79  | 276  | 67  | 132 | 1.00E-04 | 36.6 |
| TcMYB11 | ATMYB11  | 42.45 | 106 | 60  | 1  | 235 | 549  | 14  | 119 | 5.00E-25 | 99.4 |
| TcMYB11 | ATMYB11  | 35.64 | 101 | 64  | 2  | 79  | 378  | 14  | 113 | 2.00E-13 | 64.3 |
| TcMYB11 | ATMYB111 | 34.75 | 141 | 91  | 2  | 229 | 648  | 12  | 150 | 2.00E-24 | 97.4 |
| TcMYB11 | ATMYB111 | 34.62 | 104 | 67  | 2  | 79  | 387  | 14  | 116 | 2.00E-12 | 61.2 |
| TcMYB11 | AtMYB82  | 40.95 | 105 | 61  | 1  | 235 | 546  | 14  | 118 | 2.00E-24 | 94   |
| TcMYB11 | AtMYB82  | 31.43 | 105 | 71  | 2  | 79  | 390  | 14  | 117 | 2.00E-12 | 59.3 |
| TcMYB11 | ATMYB12  | 40.19 | 107 | 63  | 1  | 235 | 552  | 14  | 120 | 3.00E-24 | 97.4 |
| TcMYB11 | ATMYB12  | 33.66 | 101 | 66  | 2  | 79  | 378  | 14  | 113 | 3.00E-12 | 60.8 |
| TcMYB11 | AtMYB114 | 39.42 | 104 | 62  | 1  | 229 | 537  | 8   | 111 | 4.00E-24 | 91.3 |
| TcMYB11 | AtMYB114 | 29.63 | 108 | 75  | 2  | 58  | 378  | 3   | 109 | 6.00E-13 | 59.3 |
| TcMYB11 | ATMYB78  | 34.35 | 131 | 71  | 2  | 235 | 582  | 28  | 158 | 1.00E-23 | 95.1 |
| TcMYB11 | ATMYB78  | 30.09 | 113 | 65  | 2  | 79  | 375  | 28  | 140 | 4.00E-09 | 50.8 |
| TcMYB11 | AtMYB124 | 38.78 | 98  | 60  | 0  | 244 | 537  | 28  | 125 | 1.00E-23 | 96.7 |
| TcMYB11 | AtMYB124 | 30.56 | 108 | 75  | 1  | 88  | 411  | 28  | 134 | 2.00E-12 | 62   |
| TcMYB11 | AtMYB124 | 31.75 | 63  | 43  | 1  | 79  | 267  | 77  | 138 | 2.00E-04 | 36.6 |
| TcMYB11 | ATMYB99  | 44.25 | 113 | 54  | 3  | 229 | 540  | 13  | 124 | 2.00E-23 | 92.8 |
| TcMYB11 | ATMYB99  | 33.64 | 107 | 63  | 4  | 79  | 375  | 15  | 120 | 3.00E-11 | 56.6 |
| TcMYB11 | ATMYB75  | 40.38 | 104 | 61  | 1  | 229 | 537  | 8   | 111 | 2.00E-23 | 92.4 |
| TcMYB11 | ATMYB75  | 29.63 | 108 | 75  | 2  | 58  | 378  | 3   | 109 | 3.00E-12 | 59.7 |
| TcMYB11 | ATMYB87  | 40.38 | 104 | 60  | 2  | 235 | 540  | 14  | 117 | 3.00E-23 | 93.6 |
| TcMYB11 | ATMYB87  | 33.66 | 101 | 65  | 3  | 79  | 375  | 14  | 113 | 3.00E-10 | 54.3 |
| TcMYB11 | ATMYB90  | 32.72 | 162 | 98  | 3  | 229 | 681  | 8   | 168 | 6.00E-23 | 91.3 |
| TcMYB11 | ATMYB90  | 29.63 | 108 | 75  | 2  | 58  | 378  | 3   | 109 | 2.00E-11 | 57.4 |
| TcMYB11 | AtMYB36  | 40.38 | 104 | 60  | 2  | 235 | 540  | 14  | 117 | 2.00E-22 | 91.7 |
| TcMYB11 | AtMYB36  | 32.67 | 101 | 66  | 3  | 79  | 375  | 14  | 113 | 2.00E-10 | 55.1 |
| TcMYB11 | AtMYB113 | 38.68 | 106 | 64  | 1  | 229 | 543  | 8   | 113 | 5.00E-22 | 88.6 |
| TcMYB11 | AtMYB113 | 31.43 | 105 | 67  | 3  | 79  | 378  | 10  | 109 | 3.00E-11 | 56.6 |
| TcMYB11 | ATMYB68  | 36.22 | 127 | 79  | 3  | 235 | 609  | 14  | 136 | 7.00E-22 | 90.5 |
| TcMYB11 | ATMYB68  | 29.11 | 158 | 103 | 6  | 79  | 525  | 14  | 164 | 2.00E-10 | 55.5 |
| TcMYB11 | ATMYB88  | 36.73 | 98  | 62  | 0  | 244 | 537  | 33  | 130 | 7.00E-22 | 91.7 |
| TcMYB11 | ATMYB88  | 31.25 | 112 | 77  | 1  | 88  | 423  | 33  | 143 | 2.00E-14 | 68.2 |
| TcMYB11 | ATMYB88  | 47.22 | 36  | 19  | 1  | 79  | 186  | 82  | 116 | 2.00E-04 | 36.2 |
| TcMYB11 | ATMYB84  | 41.35 | 104 | 59  | 2  | 235 | 540  | 14  | 117 | 7.00E-22 | 89.4 |
| TcMYB11 | ATMYB84  | 32.41 | 108 | 70  | 4  | 79  | 393  | 14  | 120 | 5.00E-10 | 53.5 |
| TcMYB11 | AtMYB104 | 41.84 | 98  | 55  | 2  | 235 | 522  | 18  | 114 | 1.00E-21 | 89.7 |
| TcMYB11 | AtMYB104 | 33.33 | 102 | 63  | 3  | 76  | 366  | 17  | 113 | 3.00E-12 | 60.8 |
| TcMYB11 | ATMYB38  | 39.42 | 104 | 61  | 2  | 235 | 540  | 14  | 117 | 1.00E-20 | 85.5 |
| TcMYB11 | ATMYB38  | 31.68 | 101 | 67  | 3  | 79  | 375  | 14  | 113 | 6.00E-09 | 50.1 |
| TcMYB11 | ATMYB37  | 38.46 | 104 | 62  | 2  | 235 | 540  | 14  | 117 | 3.00E-20 | 85.1 |
| TcMYB11 | ATMYB37  | 32.38 | 105 | 65  | 4  | 79  | 375  | 14  | 113 | 1.00E-10 | 55.8 |
| TcMYB11 | ATMYB91  | 35.11 | 94  | 58  | 1  | 244 | 516  | 7   | 100 | 6.00E-16 | 72.4 |
| TcMYB11 | ATMYB91  | 32.28 | 127 | 83  | 3  | 88  | 459  | 7   | 126 | 2.00E-14 | 67.4 |
| TcMYB12 | ATMYB88  | 22.65 | 362 | 275 | 12 | 28  | 1098 | 33  | 356 | 4.00E-17 | 75.9 |
| TcMYB12 | ATMYB69  | 35.51 | 107 | 68  | 2  | 22  | 339  | 20  | 124 | 1.00E-16 | 72   |
| TcMYB12 | ATMYB54  | 40    | 90  | 53  | 1  | 7   | 273  | 2   | 91  | 3.00E-16 | 70.9 |
| TcMYB12 | AtMYB115 | 37.8  | 82  | 51  | 0  | 10  | 255  | 155 | 236 | 7.00E-16 | 71.2 |
| TcMYB12 | ATMYB77  | 28.1  | 153 | 95  | 3  | 22  | 435  | 7   | 159 | 8.00E-16 | 70.5 |
| TcMYB12 | ATMYB52  | 24.03 | 258 | 171 | 6  | 7   | 705  | 1   | 246 | 1.00E-15 | 68.9 |
| TcMYB12 | ATMYB66  | 35.16 | 91  | 57  | 2  | 16  | 282  | 17  | 107 | 2.00E-15 | 67.4 |
| TcMYB12 | AtMYB98  | 40    | 85  | 50  | 1  | 22  | 273  | 218 | 302 | 2.00E-15 | 70.1 |
| TcMYB12 | AtMYB98  | 29.9  | 97  | 65  | 4  | 73  | 354  | 182 | 277 | 1.00E-05 | 39.7 |
| TcMYB12 | AtMYB100 | 38.16 | 76  | 47  | 0  | 28  | 255  | 29  | 104 | 4.00E-15 | 67.4 |
| TcMYB12 | ATMYB105 | 31.01 | 129 | 87  | 3  | 13  | 393  | 105 | 232 | 6.00E-15 | 68.2 |
| TcMYB12 | ATMYB0   | 32.71 | 107 | 70  | 2  | 16  | 330  | 15  | 121 | 6.00E-15 | 66.6 |
| TcMYB12 | ATMYB44  | 30.25 | 119 | 80  | 2  | 22  | 369  | 7   | 125 | 8.00E-15 | 67.4 |
| TcMYB12 | AtMYB124 | 33.94 | 109 | 66  | 2  | 28  | 336  | 28  | 136 | 1.00E-14 | 68.2 |
| TcMYB12 | AtMYB56  | 25.69 | 144 | 106 | 1  | 22  | 450  | 94  | 237 | 1.00E-14 | 67.4 |
| TcMYB12 | ATMYB122 | 22.36 | 161 | 120 | 2  | 13  | 480  | 12  | 172 | 1.00E-14 | 67   |
| TcMYB12 | AtMYB64  | 38.82 | 85  | 51  | 1  | 22  | 273  | 106 | 190 | 2.00E-14 | 67.4 |
| TcMYB12 | AtMYB64  | 23.86 | 197 | 142 | 6  | 91  | 657  | 75  | 233 | 2.00E-05 | 38.5 |
| TcMYB12 | AtMYB82  | 35.16 | 91  | 58  | 2  | 13  | 282  | 12  | 99  | 2.00E-14 | 64.7 |
| TcMYB12 | AtMYB89  | 32.98 | 94  | 63  | 0  | 16  | 297  | 55  | 148 | 2.00E-14 | 64.3 |
| TcMYB12 | AtMYB114 | 32.97 | 91  | 60  | 2  | 13  | 282  | 8   | 95  | 2.00E-14 | 62.8 |
| TcMYB12 | AtMYB109 | 27.27 | 165 | 97  | 4  | 22  | 447  | 57  | 220 | 3.00E-14 | 66.6 |
| TcMYB12 | ATMYB110 | 25.79 | 159 | 110 | 2  | 22  | 474  | 68  | 223 | 3.00E-14 | 65.9 |
| TcMYB12 | AtMYB117 | 38.82 | 85  | 51  | 1  | 22  | 273  | 99  | 183 | 4.00E-14 | 65.9 |
| TcMYB12 | AtMYB70  | 30.69 | 101 | 69  | 1  | 22  | 321  | 14  | 114 | 5.00E-14 | 65.1 |
| TcMYB12 | ATMYB73  | 29.7  | 101 | 70  | 1  | 22  | 321  | 14  | 114 | 5.00E-14 | 65.1 |
| TcMYB12 | ATMYB118 | 38.82 | 85  | 51  | 1  | 22  | 273  | 190 | 274 | 7.00E-14 | 65.5 |
| TcMYB12 | ATMYB118 | 32    | 100 | 64  | 3  | 64  | 351  | 150 | 249 | 4.00E-05 | 37.7 |
| TcMYB12 | ATMYB23  | 32.97 | 91  | 59  | 2  | 16  | 282  | 13  | 103 | 8.00E-14 | 63.2 |
| TcMYB12 | ATMYB119 | 37.65 | 85  | 52  | 1  | 22  | 273  | 106 | 190 | 1.00E-13 | 64.7 |
| TcMYB12 | ATMYB119 | 28.57 | 77  | 53  | 2  | 106 | 330  | 82  | 158 | 0.001    | 33.5 |
| TcMYB12 | ATMYB15  | 26.72 | 131 | 94  | 3  | 13  | 399  | 12  | 139 | 1.00E-13 | 63.5 |
| TcMYB12 | AtMYB45  | 33.71 | 89  | 57  | 2  | 22  | 282  | 21  | 109 | 2.00E-13 | 62.8 |
| TcMYB12 | AtMYB10  | 28.97 | 107 | 74  | 2  | 13  | 327  | 14  | 120 | 2.00E-13 | 62.4 |

|         |           |       |     |     |   |     |     |    |     |          |      |
|---------|-----------|-------|-----|-----|---|-----|-----|----|-----|----------|------|
| TcMYB12 | ATMYB4    | 28.68 | 136 | 95  | 4 | 22  | 423 | 15 | 146 | 2.00E-13 | 62.8 |
| TcMYB12 | ATMYB3    | 29.6  | 125 | 86  | 3 | 22  | 390 | 15 | 124 | 2.00E-13 | 62.4 |
| TcMYB12 | ATMYB94   | 29.29 | 99  | 69  | 1 | 4   | 297 | 9  | 107 | 3.00E-13 | 62.8 |
| TcMYB12 | ATMYB75   | 31.87 | 91  | 61  | 2 | 13  | 282 | 8  | 95  | 4.00E-13 | 61.6 |
| TcMYB12 | ATMYB90   | 32.97 | 91  | 60  | 2 | 13  | 282 | 8  | 95  | 4.00E-13 | 61.6 |
| TcMYB12 | AtMYB17   | 28.75 | 160 | 112 | 4 | 4   | 477 | 9  | 162 | 6.00E-13 | 61.6 |
| TcMYB12 | AtMYB113  | 32.97 | 91  | 60  | 2 | 13  | 282 | 8  | 95  | 7.00E-13 | 60.8 |
| TcMYB12 | ATMYB5    | 28.37 | 141 | 94  | 4 | 13  | 414 | 23 | 162 | 7.00E-13 | 60.8 |
| TcMYB12 | ATMYB96   | 28.28 | 99  | 70  | 1 | 4   | 297 | 9  | 107 | 9.00E-13 | 61.6 |
| TcMYB12 | ATMYB31   | 27.27 | 99  | 71  | 1 | 4   | 297 | 9  | 107 | 2.00E-12 | 60.5 |
| TcMYB12 | ATMYB92   | 32.61 | 92  | 60  | 2 | 13  | 282 | 12 | 103 | 2.00E-12 | 60.5 |
| TcMYB12 | AtMYB93   | 31.52 | 92  | 61  | 2 | 13  | 282 | 12 | 103 | 2.00E-12 | 60.5 |
| TcMYB12 | ATMYB123  | 26.36 | 110 | 79  | 2 | 22  | 345 | 17 | 126 | 3.00E-12 | 59.3 |
| TcMYB12 | AtMYB60   | 28.28 | 99  | 70  | 1 | 4   | 297 | 9  | 107 | 4.00E-12 | 58.9 |
| TcMYB12 | ATMYB91   | 28.12 | 128 | 89  | 3 | 28  | 402 | 7  | 125 | 5.00E-12 | 59.3 |
| TcMYB12 | AtMYB49   | 30.43 | 92  | 62  | 2 | 13  | 282 | 12 | 103 | 6.00E-12 | 58.9 |
| TcMYB12 | ATMYB30   | 24.81 | 133 | 99  | 2 | 13  | 408 | 12 | 141 | 6.00E-12 | 58.9 |
| TcMYB12 | AtMYB53   | 31.52 | 92  | 61  | 2 | 13  | 282 | 12 | 103 | 7.00E-12 | 58.5 |
| TcMYB12 | ATMYB121  | 26.32 | 133 | 92  | 4 | 22  | 402 | 30 | 160 | 7.00E-12 | 58.2 |
| TcMYB12 | AtMYB97   | 30.85 | 94  | 63  | 2 | 7   | 282 | 17 | 110 | 8.00E-12 | 58.9 |
| TcMYB12 | AtMYB9    | 30.43 | 92  | 62  | 2 | 13  | 282 | 12 | 103 | 8.00E-12 | 58.5 |
| TcMYB12 | AtMYB19   | 27.36 | 106 | 75  | 2 | 22  | 333 | 15 | 120 | 9.00E-12 | 57.8 |
| TcMYB12 | ATMYB95   | 21.93 | 187 | 144 | 3 | 13  | 567 | 12 | 196 | 1.00E-11 | 57.8 |
| TcMYB12 | AtMYB18   | 26.13 | 111 | 80  | 2 | 22  | 348 | 13 | 123 | 1.00E-11 | 57.8 |
| TcMYB12 | ATMYB34   | 32.61 | 92  | 60  | 2 | 13  | 282 | 12 | 103 | 1.00E-11 | 57.8 |
| TcMYB12 | MYB7      | 30.16 | 126 | 84  | 4 | 22  | 387 | 15 | 123 | 1.00E-11 | 57.4 |
| TcMYB12 | AtMYB50   | 27.05 | 122 | 87  | 3 | 13  | 372 | 12 | 128 | 1.00E-11 | 57.8 |
| TcMYB12 | AtMYB107  | 30.43 | 92  | 62  | 2 | 13  | 282 | 12 | 103 | 2.00E-11 | 57   |
| TcMYB12 | ATMYB13   | 30.53 | 95  | 64  | 2 | 4   | 282 | 9  | 103 | 2.00E-11 | 56.2 |
| TcMYB12 | AtMYB22   | 32.89 | 76  | 51  | 1 | 28  | 255 | 57 | 131 | 3.00E-11 | 56.2 |
| TcMYB12 | AtMYB22   | 45.45 | 44  | 23  | 1 | 169 | 297 | 52 | 95  | 2.00E-06 | 41.6 |
| TcMYB12 | ATMYB72   | 27.17 | 92  | 65  | 2 | 13  | 282 | 14 | 105 | 3.00E-11 | 56.6 |
| TcMYB12 | ATMYB65   | 30.53 | 95  | 64  | 2 | 4   | 282 | 38 | 132 | 3.00E-11 | 57.4 |
| TcMYB12 | ATMYB67   | 23.93 | 117 | 87  | 3 | 13  | 357 | 22 | 133 | 4.00E-11 | 56.2 |
| TcMYB12 | ATMYB120  | 30.85 | 94  | 63  | 2 | 7   | 282 | 24 | 117 | 4.00E-11 | 57   |
| TcMYB12 | AtMYB1    | 26.8  | 97  | 70  | 1 | 22  | 309 | 56 | 152 | 4.00E-11 | 56.6 |
| TcMYB12 | ATMYB33   | 31.52 | 92  | 61  | 2 | 13  | 282 | 32 | 123 | 5.00E-11 | 56.6 |
| TcMYB12 | AtMYB104  | 33.33 | 87  | 56  | 2 | 28  | 282 | 21 | 107 | 6.00E-11 | 56.2 |
| TcMYB12 | AtMYB32   | 30.34 | 89  | 60  | 2 | 22  | 282 | 15 | 103 | 6.00E-11 | 55.5 |
| TcMYB12 | ATMYB14   | 29.35 | 92  | 63  | 2 | 13  | 282 | 12 | 103 | 6.00E-11 | 55.1 |
| TcMYB12 | ATMYB102  | 29.35 | 92  | 63  | 2 | 13  | 282 | 12 | 103 | 7.00E-11 | 55.8 |
| TcMYB12 | AtMYB40   | 24.5  | 151 | 111 | 4 | 4   | 447 | 9  | 158 | 7.00E-11 | 55.1 |
| TcMYB12 | ATMYB87   | 31.18 | 93  | 61  | 3 | 4   | 273 | 9  | 101 | 7.00E-11 | 55.5 |
| TcMYB12 | AtMYB83   | 23.87 | 155 | 112 | 5 | 13  | 459 | 30 | 175 | 8.00E-11 | 55.5 |
| TcMYB12 | AtMYB51   | 29.35 | 92  | 63  | 2 | 13  | 282 | 13 | 104 | 9.00E-11 | 55.5 |
| TcMYB12 | AtMYB79   | 31.46 | 89  | 59  | 2 | 22  | 282 | 9  | 97  | 9.00E-11 | 54.7 |
| TcMYB12 | ATMYB101  | 32.98 | 94  | 59  | 3 | 13  | 282 | 18 | 109 | 9.00E-11 | 55.8 |
| TcMYB12 | AtMYB85   | 24.14 | 145 | 108 | 3 | 4   | 432 | 9  | 152 | 1.00E-10 | 54.7 |
| TcMYB12 | AtMYB76   | 26.04 | 192 | 133 | 8 | 13  | 561 | 12 | 195 | 1.00E-10 | 55.1 |
| TcMYB12 | ATMYB86   | 23.77 | 122 | 91  | 3 | 13  | 372 | 12 | 128 | 1.00E-10 | 55.1 |
| TcMYB12 | ATMYB61   | 24.03 | 154 | 115 | 4 | 13  | 468 | 12 | 149 | 1.00E-10 | 55.1 |
| TcMYB12 | ATMYB11   | 27.07 | 133 | 88  | 3 | 4   | 375 | 9  | 141 | 1.00E-10 | 54.7 |
| TcMYB12 | AtMYB27   | 28.26 | 92  | 64  | 2 | 13  | 282 | 9  | 100 | 2.00E-10 | 53.5 |
| TcMYB12 | AtMYB81   | 30.34 | 89  | 60  | 2 | 22  | 282 | 23 | 111 | 2.00E-10 | 54.7 |
| TcMYB12 | ATMYB29   | 24.68 | 158 | 105 | 4 | 13  | 444 | 12 | 168 | 2.00E-10 | 54.3 |
| TcMYB12 | ATMYB106  | 26.04 | 96  | 70  | 1 | 13  | 297 | 55 | 150 | 2.00E-10 | 54.3 |
| TcMYB12 | ATMYB63   | 26.35 | 148 | 105 | 5 | 13  | 444 | 14 | 144 | 3.00E-10 | 53.5 |
| TcMYB12 | ATMYB25   | 31.76 | 85  | 57  | 1 | 22  | 273 | 51 | 135 | 3.00E-10 | 53.9 |
| TcMYB12 | AtMYB6    | 27.42 | 124 | 88  | 3 | 22  | 387 | 15 | 123 | 3.00E-10 | 52.8 |
| TcMYB12 | ATMYB71   | 30.34 | 89  | 60  | 2 | 22  | 282 | 21 | 109 | 4.00E-10 | 52.8 |
| TcMYB12 | AtMYB41   | 29.35 | 92  | 63  | 2 | 13  | 282 | 12 | 103 | 5.00E-10 | 52.8 |
| TcMYB12 | ATMYB16   | 24.24 | 99  | 74  | 1 | 4   | 297 | 9  | 107 | 6.00E-10 | 52.8 |
| TcMYB12 | AtMYB74   | 29.35 | 92  | 63  | 2 | 13  | 282 | 13 | 104 | 8.00E-10 | 52.4 |
| TcMYB12 | ATMYB2    | 31.52 | 92  | 61  | 2 | 13  | 282 | 20 | 111 | 8.00E-10 | 52   |
| TcMYB12 | ATMYB58   | 24.06 | 133 | 99  | 2 | 13  | 405 | 14 | 146 | 8.00E-10 | 52   |
| TcMYB12 | MYB8      | 23.81 | 147 | 110 | 3 | 22  | 456 | 15 | 146 | 8.00E-10 | 51.2 |
| TcMYB12 | ATMYB55   | 25.18 | 139 | 90  | 4 | 13  | 387 | 12 | 135 | 8.00E-10 | 52.4 |
| TcMYB12 | ATMYB28   | 25.78 | 128 | 94  | 2 | 13  | 393 | 12 | 135 | 9.00E-10 | 52.4 |
| TcMYB12 | AtMYB47   | 26.83 | 82  | 59  | 1 | 13  | 255 | 12 | 93  | 1.00E-09 | 51.6 |
| TcMYB12 | ATMYB35   | 25.23 | 107 | 78  | 2 | 13  | 327 | 12 | 118 | 1.00E-09 | 51.6 |
| TcMYB12 | ATMYB111  | 29.47 | 95  | 65  | 2 | 4   | 282 | 9  | 103 | 1.00E-09 | 51.6 |
| TcMYB12 | ATMYB12   | 28.42 | 95  | 66  | 2 | 4   | 282 | 9  | 103 | 2.00E-09 | 51.6 |
| TcMYB12 | AtMYB103  | 27.17 | 92  | 65  | 2 | 13  | 282 | 12 | 103 | 2.00E-09 | 51.2 |
| TcMYB12 | AtMYB43   | 23.78 | 164 | 114 | 5 | 4   | 462 | 9  | 171 | 2.00E-09 | 50.8 |
| TcMYB12 | ATMYB37   | 32.22 | 90  | 58  | 3 | 13  | 273 | 12 | 101 | 2.00E-09 | 50.8 |
| TcMYB12 | ATMYB57   | 26.09 | 92  | 66  | 2 | 13  | 282 | 25 | 116 | 2.00E-09 | 49.7 |
| TcMYB12 | AtMYB36   | 33.33 | 90  | 57  | 3 | 13  | 273 | 12 | 101 | 3.00E-09 | 50.8 |
| TcMYB12 | AtMYB42   | 25.89 | 112 | 81  | 2 | 4   | 333 | 9  | 120 | 3.00E-09 | 50.4 |
| TcMYB12 | ATMYB59-3 | 30.77 | 91  | 59  | 3 | 22  | 282 | 11 | 99  | 3.00E-09 | 49.7 |
| TcMYB12 | ATMYB48   | 30.77 | 91  | 59  | 3 | 22  | 282 | 10 | 98  | 4.00E-09 | 49.7 |

|         |           |       |     |     |    |     |      |    |     |          |      |
|---------|-----------|-------|-----|-----|----|-----|------|----|-----|----------|------|
| TcMYB12 | ATMYB26   | 25.74 | 101 | 64  | 2  | 13  | 282  | 12 | 112 | 5.00E-09 | 50.1 |
| TcMYB12 | ATMYB46   | 23.91 | 92  | 68  | 2  | 13  | 282  | 18 | 109 | 6.00E-09 | 49.3 |
| TcMYB12 | AtMYB112  | 29.17 | 96  | 66  | 2  | 1   | 282  | 28 | 123 | 6.00E-09 | 48.9 |
| TcMYB12 | ATMYB38   | 32.22 | 90  | 58  | 3  | 13  | 273  | 12 | 101 | 7.00E-09 | 49.3 |
| TcMYB12 | AtMYB62   | 26.09 | 92  | 66  | 2  | 13  | 282  | 19 | 110 | 9.00E-09 | 48.9 |
| TcMYB12 | AtMYB24   | 27.17 | 92  | 65  | 2  | 13  | 282  | 17 | 108 | 2.00E-08 | 47.4 |
| TcMYB12 | ATMYB68   | 31.11 | 90  | 59  | 3  | 13  | 273  | 12 | 101 | 5.00E-08 | 47   |
| TcMYB12 | ATMYB80   | 25.84 | 89  | 64  | 2  | 13  | 273  | 12 | 100 | 5.00E-08 | 46.6 |
| TcMYB12 | ATMYB3    | 27.17 | 92  | 65  | 2  | 13  | 282  | 20 | 111 | 6.00E-08 | 45.8 |
| TcMYB12 | AtMYB108  | 28.26 | 92  | 64  | 2  | 13  | 282  | 19 | 110 | 7.00E-08 | 46.2 |
| TcMYB12 | ATMYB84   | 24.59 | 122 | 77  | 4  | 13  | 333  | 12 | 133 | 1.00E-07 | 45.4 |
| TcMYB12 | AtMYB116  | 29.07 | 86  | 59  | 2  | 22  | 273  | 21 | 106 | 1.00E-07 | 45.1 |
| TcMYB12 | ATMYB78   | 24.24 | 99  | 74  | 2  | 13  | 306  | 26 | 120 | 3.00E-07 | 44.3 |
| TcMYB12 | AtMYB20   | 21.74 | 138 | 106 | 3  | 4   | 411  | 9  | 141 | 8.00E-07 | 42.7 |
| TcMYB12 | ATMYB99   | 25.78 | 128 | 93  | 4  | 88  | 465  | 45 | 154 | 2.00E-06 | 41.2 |
| TcMYB13 | ATMYB65   | 39.9  | 406 | 214 | 11 | 94  | 1221 | 35 | 422 | 7.00E-78 | 244  |
| TcMYB13 | ATMYB33   | 42.74 | 358 | 182 | 11 | 103 | 1107 | 29 | 378 | 8.00E-75 | 236  |
| TcMYB13 | ATMYB101  | 40.92 | 369 | 187 | 12 | 103 | 1116 | 15 | 344 | 5.00E-70 | 222  |
| TcMYB13 | AtMYB81   | 39.19 | 370 | 205 | 13 | 109 | 1158 | 19 | 364 | 1.00E-66 | 212  |
| TcMYB13 | AtMYB97   | 69.34 | 137 | 41  | 1  | 91  | 498  | 12 | 148 | 7.00E-65 | 206  |
| TcMYB13 | ATMYB120  | 38.3  | 389 | 234 | 8  | 100 | 1248 | 22 | 389 | 2.00E-63 | 206  |
| TcMYB13 | ATMYB92   | 65.38 | 104 | 36  | 0  | 112 | 423  | 12 | 115 | 5.00E-47 | 157  |
| TcMYB13 | ATMYB102  | 64.42 | 104 | 37  | 0  | 112 | 423  | 12 | 115 | 5.00E-47 | 158  |
| TcMYB13 | AtMYB74   | 63.46 | 104 | 38  | 0  | 112 | 423  | 13 | 116 | 8.00E-47 | 157  |
| TcMYB13 | AtMYB9    | 62.5  | 104 | 39  | 0  | 112 | 423  | 12 | 115 | 3.00E-46 | 155  |
| TcMYB13 | AtMYB49   | 36.7  | 267 | 156 | 8  | 112 | 873  | 12 | 250 | 4.00E-46 | 155  |
| TcMYB13 | ATMYB71   | 56.3  | 119 | 47  | 1  | 91  | 432  | 6  | 124 | 4.00E-46 | 153  |
| TcMYB13 | ATMYB3    | 45.24 | 168 | 92  | 2  | 112 | 615  | 12 | 153 | 4.00E-46 | 153  |
| TcMYB13 | AtMYB51   | 41.32 | 242 | 126 | 8  | 112 | 789  | 13 | 252 | 8.00E-46 | 155  |
| TcMYB13 | AtMYB17   | 63.46 | 104 | 38  | 0  | 112 | 423  | 12 | 115 | 8.00E-46 | 153  |
| TcMYB13 | AtMYB41   | 60.58 | 104 | 41  | 0  | 112 | 423  | 12 | 115 | 1.00E-45 | 152  |
| TcMYB13 | AtMYB53   | 62.5  | 104 | 39  | 0  | 112 | 423  | 12 | 115 | 2.00E-45 | 153  |
| TcMYB13 | AtMYB107  | 60.58 | 104 | 41  | 0  | 112 | 423  | 12 | 115 | 2.00E-45 | 153  |
| TcMYB13 | ATMYB34   | 40.79 | 228 | 125 | 9  | 112 | 765  | 12 | 214 | 3.00E-45 | 152  |
| TcMYB13 | ATMYB14   | 58.65 | 104 | 43  | 0  | 112 | 423  | 12 | 115 | 3.00E-45 | 150  |
| TcMYB13 | AtMYB79   | 60    | 105 | 42  | 0  | 115 | 429  | 7  | 111 | 4.00E-45 | 150  |
| TcMYB13 | ATMYB13   | 60.58 | 104 | 41  | 0  | 112 | 423  | 12 | 115 | 6.00E-45 | 149  |
| TcMYB13 | AtMYB24   | 55.36 | 112 | 46  | 1  | 97  | 420  | 8  | 119 | 9.00E-45 | 148  |
| TcMYB13 | AtMYB93   | 62.5  | 104 | 39  | 0  | 112 | 423  | 12 | 115 | 1.00E-44 | 152  |
| TcMYB13 | ATMYB15   | 47.77 | 157 | 82  | 2  | 112 | 582  | 12 | 158 | 2.00E-44 | 149  |
| TcMYB13 | ATMYB3    | 54.87 | 113 | 46  | 1  | 97  | 420  | 10 | 122 | 2.00E-44 | 147  |
| TcMYB13 | AtMYB6    | 61.76 | 102 | 39  | 0  | 118 | 423  | 14 | 115 | 3.00E-44 | 147  |
| TcMYB13 | MYB8      | 59.62 | 104 | 42  | 0  | 112 | 423  | 12 | 115 | 6.00E-44 | 145  |
| TcMYB13 | ATMYB57   | 54.63 | 108 | 49  | 0  | 106 | 429  | 23 | 130 | 8.00E-44 | 145  |
| TcMYB13 | ATMYB66   | 54.05 | 111 | 51  | 0  | 91  | 423  | 9  | 119 | 1.00E-43 | 145  |
| TcMYB13 | ATMYB106  | 53.28 | 122 | 57  | 1  | 58  | 423  | 43 | 158 | 2.00E-43 | 149  |
| TcMYB13 | ATMYB122  | 38.25 | 251 | 142 | 8  | 112 | 825  | 12 | 249 | 2.00E-43 | 148  |
| TcMYB13 | ATMYB95   | 45.18 | 166 | 85  | 3  | 112 | 591  | 12 | 172 | 3.00E-43 | 145  |
| TcMYB13 | ATMYB121  | 44.65 | 159 | 88  | 1  | 115 | 591  | 28 | 183 | 4.00E-43 | 145  |
| TcMYB13 | ATMYB28   | 36.78 | 242 | 143 | 5  | 103 | 798  | 9  | 224 | 4.00E-43 | 148  |
| TcMYB13 | MYB7      | 59.62 | 104 | 42  | 0  | 112 | 423  | 12 | 115 | 4.00E-43 | 145  |
| TcMYB13 | ATMYB16   | 59.62 | 104 | 42  | 0  | 112 | 423  | 12 | 115 | 5.00E-43 | 147  |
| TcMYB13 | AtMYB116  | 53.1  | 113 | 53  | 0  | 91  | 429  | 11 | 123 | 6.00E-43 | 145  |
| TcMYB13 | ATMYB94   | 58.65 | 104 | 43  | 0  | 112 | 423  | 12 | 115 | 1.00E-42 | 146  |
| TcMYB13 | AtMYB60   | 58.65 | 104 | 43  | 0  | 112 | 423  | 12 | 115 | 2.00E-42 | 144  |
| TcMYB13 | AtMYB43   | 37.5  | 232 | 126 | 7  | 112 | 750  | 12 | 236 | 2.00E-42 | 145  |
| TcMYB13 | ATMYB5    | 56.73 | 104 | 45  | 0  | 112 | 423  | 23 | 126 | 2.00E-42 | 143  |
| TcMYB13 | ATMYB86   | 57.55 | 106 | 45  | 0  | 112 | 429  | 12 | 117 | 2.00E-42 | 145  |
| TcMYB13 | AtMYB85   | 47.33 | 150 | 78  | 4  | 112 | 558  | 12 | 145 | 3.00E-42 | 143  |
| TcMYB13 | ATMYB29   | 58.49 | 106 | 44  | 0  | 103 | 420  | 9  | 114 | 3.00E-42 | 145  |
| TcMYB13 | ATMYB96   | 57.69 | 104 | 44  | 0  | 112 | 423  | 12 | 115 | 3.00E-42 | 145  |
| TcMYB13 | ATMYB4    | 60.78 | 102 | 40  | 0  | 118 | 423  | 14 | 115 | 3.00E-42 | 143  |
| TcMYB13 | ATMYB23   | 41.21 | 165 | 97  | 2  | 85  | 579  | 3  | 163 | 3.00E-42 | 141  |
| TcMYB13 | AtMYB50   | 58.65 | 104 | 43  | 0  | 112 | 423  | 12 | 115 | 3.00E-42 | 144  |
| TcMYB13 | AtMYB32   | 59.8  | 102 | 41  | 0  | 118 | 423  | 14 | 115 | 4.00E-42 | 143  |
| TcMYB13 | ATMYB63   | 58.65 | 104 | 43  | 0  | 112 | 423  | 14 | 117 | 4.00E-42 | 143  |
| TcMYB13 | AtMYB36   | 59.43 | 106 | 42  | 1  | 109 | 423  | 11 | 116 | 5.00E-42 | 144  |
| TcMYB13 | ATMYB30   | 57.55 | 106 | 45  | 0  | 106 | 423  | 10 | 115 | 6.00E-42 | 144  |
| TcMYB13 | AtMYB76   | 57.01 | 107 | 46  | 0  | 103 | 423  | 9  | 115 | 6.00E-42 | 144  |
| TcMYB13 | AtMYB42   | 56.73 | 104 | 45  | 0  | 112 | 423  | 12 | 115 | 9.00E-42 | 142  |
| TcMYB13 | ATMYB59-3 | 54.87 | 113 | 50  | 1  | 115 | 450  | 9  | 121 | 1.00E-41 | 140  |
| TcMYB13 | ATMYB87   | 58.49 | 106 | 43  | 1  | 109 | 423  | 11 | 116 | 1.00E-41 | 142  |
| TcMYB13 | ATMYB72   | 57.69 | 104 | 44  | 0  | 112 | 423  | 14 | 117 | 1.00E-41 | 142  |
| TcMYB13 | ATMYB61   | 57.69 | 104 | 44  | 0  | 112 | 423  | 12 | 115 | 2.00E-41 | 144  |
| TcMYB13 | ATMYB48   | 54.87 | 113 | 50  | 1  | 115 | 450  | 8  | 120 | 2.00E-41 | 140  |
| TcMYB13 | AtMYB20   | 54.72 | 106 | 48  | 0  | 112 | 429  | 12 | 117 | 2.00E-41 | 141  |
| TcMYB13 | ATMYB58   | 55.77 | 104 | 46  | 0  | 112 | 423  | 14 | 117 | 4.00E-41 | 140  |
| TcMYB13 | ATMYB11   | 56.73 | 104 | 45  | 0  | 112 | 423  | 12 | 115 | 5.00E-41 | 142  |
| TcMYB13 | AtMYB82   | 48.76 | 121 | 62  | 0  | 100 | 462  | 8  | 128 | 5.00E-41 | 137  |
| TcMYB13 | ATMYB12   | 55.77 | 104 | 46  | 0  | 112 | 423  | 12 | 115 | 6.00E-41 | 142  |

|         |          |       |     |     |    |     |      |     |     |          |      |
|---------|----------|-------|-----|-----|----|-----|------|-----|-----|----------|------|
| TcMYB13 | ATMYB99  | 54.05 | 111 | 44  | 1  | 112 | 423  | 13  | 123 | 7.00E-41 | 139  |
| TcMYB13 | AtMYB62  | 53.77 | 106 | 49  | 0  | 112 | 429  | 19  | 124 | 7.00E-41 | 140  |
| TcMYB13 | ATMYB31  | 56.73 | 104 | 45  | 0  | 112 | 423  | 12  | 115 | 1.00E-40 | 140  |
| TcMYB13 | ATMYB46  | 55.77 | 104 | 46  | 0  | 112 | 423  | 18  | 121 | 1.00E-40 | 139  |
| TcMYB13 | AtMYB104 | 32.51 | 366 | 231 | 15 | 118 | 1167 | 18  | 338 | 2.00E-40 | 141  |
| TcMYB13 | ATMYB0   | 55.34 | 103 | 46  | 0  | 115 | 423  | 15  | 117 | 2.00E-40 | 137  |
| TcMYB13 | AtMYB47  | 42.44 | 172 | 86  | 4  | 112 | 588  | 12  | 183 | 2.00E-40 | 138  |
| TcMYB13 | AtMYB112 | 52.83 | 106 | 50  | 0  | 112 | 429  | 32  | 137 | 2.00E-40 | 137  |
| TcMYB13 | ATMYB123 | 54.81 | 104 | 47  | 0  | 112 | 423  | 14  | 117 | 2.00E-40 | 138  |
| TcMYB13 | ATMYB80  | 55.24 | 105 | 47  | 0  | 109 | 423  | 11  | 115 | 2.00E-40 | 139  |
| TcMYB13 | ATMYB68  | 59.43 | 106 | 42  | 1  | 109 | 423  | 11  | 116 | 2.00E-40 | 140  |
| TcMYB13 | ATMYB35  | 54.29 | 105 | 48  | 0  | 109 | 423  | 11  | 115 | 5.00E-40 | 138  |
| TcMYB13 | ATMYB84  | 58.49 | 106 | 43  | 1  | 109 | 423  | 11  | 116 | 6.00E-40 | 138  |
| TcMYB13 | AtMYB83  | 33.46 | 269 | 130 | 6  | 91  | 750  | 23  | 290 | 7.00E-40 | 139  |
| TcMYB13 | AtMYB103 | 42.07 | 164 | 86  | 3  | 112 | 576  | 12  | 163 | 1.00E-39 | 139  |
| TcMYB13 | AtMYB108 | 53.77 | 106 | 49  | 0  | 112 | 429  | 19  | 124 | 1.00E-39 | 137  |
| TcMYB13 | ATMYB38  | 43.29 | 164 | 89  | 3  | 109 | 588  | 11  | 152 | 1.00E-39 | 137  |
| TcMYB13 | ATMYB2   | 52.83 | 106 | 50  | 0  | 112 | 429  | 20  | 125 | 1.00E-39 | 136  |
| TcMYB13 | AtMYB10  | 55.77 | 104 | 46  | 0  | 112 | 423  | 14  | 117 | 2.00E-39 | 134  |
| TcMYB13 | ATMYB111 | 55.77 | 104 | 46  | 0  | 112 | 423  | 12  | 115 | 5.00E-39 | 136  |
| TcMYB13 | ATMYB37  | 56.19 | 105 | 45  | 1  | 112 | 423  | 12  | 116 | 5.00E-39 | 136  |
| TcMYB13 | ATMYB55  | 53.39 | 118 | 43  | 1  | 112 | 429  | 12  | 129 | 5.00E-39 | 136  |
| TcMYB13 | ATMYB67  | 50.93 | 108 | 53  | 0  | 100 | 423  | 18  | 125 | 8.00E-39 | 135  |
| TcMYB13 | ATMYB26  | 39.66 | 174 | 96  | 4  | 112 | 606  | 12  | 176 | 3.00E-38 | 135  |
| TcMYB13 | AtMYB40  | 47.33 | 131 | 68  | 1  | 112 | 501  | 12  | 142 | 3.00E-38 | 132  |
| TcMYB13 | AtMYB27  | 53.7  | 108 | 50  | 0  | 109 | 432  | 8   | 115 | 8.00E-38 | 130  |
| TcMYB13 | AtMYB114 | 47.27 | 110 | 58  | 0  | 94  | 423  | 2   | 111 | 2.00E-37 | 126  |
| TcMYB13 | ATMYB75  | 47.27 | 110 | 58  | 0  | 94  | 423  | 2   | 111 | 4.00E-36 | 126  |
| TcMYB13 | AtMYB45  | 54.9  | 102 | 46  | 0  | 115 | 420  | 19  | 120 | 5.00E-36 | 126  |
| TcMYB13 | AtMYB19  | 34.56 | 217 | 131 | 4  | 115 | 732  | 13  | 210 | 9.00E-36 | 125  |
| TcMYB13 | ATMYB78  | 45.83 | 120 | 51  | 1  | 112 | 429  | 26  | 145 | 4.00E-35 | 125  |
| TcMYB13 | ATMYB90  | 45.13 | 113 | 62  | 0  | 94  | 432  | 2   | 114 | 8.00E-35 | 122  |
| TcMYB13 | AtMYB113 | 48.08 | 104 | 54  | 0  | 112 | 423  | 8   | 111 | 1.00E-34 | 122  |
| TcMYB13 | AtMYB18  | 50.49 | 103 | 51  | 0  | 115 | 423  | 11  | 113 | 1.00E-32 | 117  |
| TcMYB13 | AtMYB109 | 53.51 | 114 | 50  | 3  | 91  | 423  | 45  | 156 | 3.00E-31 | 116  |
| TcMYB13 | AtMYB98  | 44.72 | 123 | 66  | 2  | 109 | 471  | 214 | 335 | 1.00E-30 | 115  |
| TcMYB13 | ATMYB119 | 49.12 | 114 | 57  | 3  | 94  | 432  | 97  | 207 | 1.00E-30 | 115  |
| TcMYB13 | ATMYB73  | 51.96 | 102 | 49  | 1  | 118 | 423  | 13  | 113 | 2.00E-30 | 112  |
| TcMYB13 | AtMYB70  | 50.94 | 106 | 52  | 1  | 118 | 435  | 13  | 117 | 3.00E-30 | 112  |
| TcMYB13 | AtMYB1   | 50.88 | 114 | 54  | 2  | 88  | 423  | 43  | 155 | 1.00E-29 | 112  |
| TcMYB13 | ATMYB77  | 49.53 | 107 | 54  | 1  | 118 | 438  | 6   | 111 | 1.00E-29 | 110  |
| TcMYB13 | ATMYB25  | 50.91 | 110 | 53  | 2  | 97  | 423  | 43  | 150 | 1.00E-29 | 111  |
| TcMYB13 | AtMYB64  | 50    | 106 | 52  | 3  | 118 | 432  | 105 | 207 | 2.00E-29 | 111  |
| TcMYB13 | ATMYB118 | 47.22 | 108 | 57  | 2  | 109 | 432  | 186 | 291 | 2.00E-28 | 108  |
| TcMYB13 | AtMYB115 | 47.06 | 102 | 53  | 2  | 118 | 420  | 158 | 257 | 5.00E-28 | 106  |
| TcMYB13 | ATMYB44  | 50    | 102 | 51  | 1  | 118 | 423  | 6   | 106 | 7.00E-28 | 105  |
| TcMYB13 | AtMYB117 | 36.36 | 154 | 97  | 3  | 112 | 570  | 96  | 243 | 2.00E-27 | 104  |
| TcMYB13 | AtMYB56  | 42.65 | 136 | 74  | 3  | 79  | 474  | 78  | 212 | 3.00E-27 | 103  |
| TcMYB13 | AtMYB100 | 46.23 | 106 | 56  | 2  | 112 | 426  | 24  | 127 | 4.00E-27 | 101  |
| TcMYB13 | ATMYB105 | 42.98 | 114 | 64  | 2  | 91  | 429  | 98  | 209 | 1.00E-26 | 102  |
| TcMYB13 | ATMYB54  | 45.71 | 105 | 56  | 2  | 118 | 429  | 6   | 108 | 5.00E-26 | 98.6 |
| TcMYB13 | ATMYB110 | 46.15 | 104 | 56  | 1  | 118 | 429  | 67  | 169 | 6.00E-26 | 99.8 |
| TcMYB13 | ATMYB52  | 44.64 | 112 | 61  | 2  | 118 | 450  | 5   | 114 | 8.00E-26 | 98.2 |
| TcMYB13 | ATMYB69  | 45.87 | 109 | 57  | 2  | 109 | 429  | 16  | 121 | 8.00E-26 | 98.2 |
| TcMYB13 | AtMYB22  | 40.95 | 105 | 62  | 2  | 112 | 426  | 52  | 154 | 4.00E-22 | 87.8 |
| TcMYB13 | ATMYB91  | 37.86 | 103 | 62  | 1  | 127 | 429  | 7   | 109 | 4.00E-21 | 86.7 |
| TcMYB13 | AtMYB89  | 39.81 | 103 | 59  | 2  | 121 | 420  | 57  | 155 | 3.00E-19 | 78.2 |
| TcMYB13 | AtMYB124 | 32.67 | 101 | 68  | 1  | 127 | 429  | 28  | 127 | 2.00E-16 | 73.2 |
| TcMYB13 | ATMYB88  | 31.37 | 102 | 69  | 2  | 127 | 429  | 33  | 132 | 9.00E-15 | 68.2 |
| TcMYB14 | AtMYB85  | 55.71 | 219 | 86  | 3  | 1   | 624  | 1   | 217 | 9.00E-86 | 250  |
| TcMYB14 | AtMYB20  | 47.72 | 285 | 124 | 6  | 1   | 780  | 1   | 277 | 7.00E-84 | 246  |
| TcMYB14 | AtMYB43  | 61.34 | 194 | 72  | 3  | 1   | 573  | 1   | 190 | 1.00E-83 | 247  |
| TcMYB14 | AtMYB42  | 78.63 | 131 | 28  | 0  | 1   | 393  | 1   | 131 | 1.00E-79 | 236  |
| TcMYB14 | AtMYB40  | 52.79 | 197 | 91  | 3  | 1   | 585  | 1   | 194 | 2.00E-72 | 216  |
| TcMYB14 | ATMYB99  | 71.21 | 132 | 31  | 1  | 4   | 378  | 3   | 134 | 3.00E-70 | 210  |
| TcMYB14 | ATMYB16  | 69.92 | 133 | 40  | 0  | 1   | 399  | 1   | 133 | 1.00E-69 | 211  |
| TcMYB14 | AtMYB107 | 70.23 | 131 | 39  | 0  | 1   | 393  | 1   | 131 | 2.00E-69 | 211  |
| TcMYB14 | AtMYB17  | 72.09 | 129 | 36  | 0  | 1   | 387  | 1   | 129 | 3.00E-69 | 209  |
| TcMYB14 | AtMYB50  | 55.61 | 187 | 82  | 4  | 1   | 558  | 1   | 178 | 2.00E-67 | 205  |
| TcMYB14 | ATMYB92  | 59.51 | 163 | 58  | 2  | 1   | 465  | 1   | 163 | 6.00E-67 | 204  |
| TcMYB14 | AtMYB9   | 67.94 | 131 | 42  | 0  | 1   | 393  | 1   | 131 | 7.00E-67 | 204  |
| TcMYB14 | AtMYB93  | 67.94 | 131 | 42  | 0  | 1   | 393  | 1   | 131 | 1.00E-66 | 204  |
| TcMYB14 | AtMYB53  | 67.18 | 131 | 43  | 0  | 1   | 393  | 1   | 131 | 5.00E-66 | 201  |
| TcMYB14 | ATMYB61  | 44.8  | 250 | 132 | 4  | 1   | 732  | 1   | 226 | 8.00E-66 | 202  |
| TcMYB14 | AtMYB6   | 63.77 | 138 | 50  | 0  | 1   | 414  | 1   | 138 | 9.00E-66 | 198  |
| TcMYB14 | ATMYB102 | 70.31 | 128 | 38  | 0  | 1   | 384  | 1   | 128 | 1.00E-65 | 202  |
| TcMYB14 | AtMYB41  | 67.65 | 136 | 44  | 0  | 1   | 408  | 1   | 136 | 1.00E-65 | 199  |
| TcMYB14 | ATMYB106 | 64.75 | 139 | 49  | 0  | 13  | 429  | 48  | 186 | 8.00E-65 | 201  |
| TcMYB14 | AtMYB74  | 69.77 | 129 | 38  | 1  | 1   | 384  | 1   | 129 | 2.00E-64 | 198  |
| TcMYB14 | AtMYB32  | 59.86 | 147 | 59  | 1  | 1   | 441  | 1   | 146 | 3.00E-64 | 196  |

|         |           |       |     |     |   |    |     |     |     |          |     |
|---------|-----------|-------|-----|-----|---|----|-----|-----|-----|----------|-----|
| TcMYB14 | ATMYB86   | 68.22 | 129 | 41  | 0 | 1  | 387 | 1   | 129 | 7.00E-64 | 197 |
| TcMYB14 | ATMYB4    | 53.23 | 186 | 86  | 3 | 1  | 555 | 1   | 170 | 2.00E-63 | 194 |
| TcMYB14 | MYB7      | 63.64 | 132 | 48  | 0 | 1  | 396 | 1   | 132 | 2.00E-63 | 193 |
| TcMYB14 | ATMYB5    | 60.56 | 142 | 56  | 0 | 13 | 438 | 16  | 157 | 1.00E-62 | 191 |
| TcMYB14 | ATMYB28   | 61.64 | 146 | 55  | 1 | 1  | 435 | 1   | 146 | 2.00E-62 | 194 |
| TcMYB14 | MYB8      | 59.57 | 141 | 57  | 0 | 1  | 423 | 1   | 141 | 3.00E-62 | 188 |
| TcMYB14 | AtMYB49   | 40.6  | 266 | 151 | 3 | 1  | 777 | 1   | 252 | 5.00E-62 | 191 |
| TcMYB14 | ATMYB13   | 48    | 200 | 101 | 2 | 1  | 591 | 1   | 183 | 7.00E-62 | 189 |
| TcMYB14 | ATMYB80   | 65.38 | 130 | 45  | 0 | 1  | 390 | 1   | 130 | 7.00E-62 | 191 |
| TcMYB14 | ATMYB35   | 41.54 | 260 | 150 | 5 | 1  | 774 | 1   | 247 | 1.00E-61 | 191 |
| TcMYB14 | ATMYB3    | 62.88 | 132 | 49  | 0 | 1  | 396 | 1   | 132 | 2.00E-61 | 188 |
| TcMYB14 | ATMYB29   | 60.14 | 143 | 57  | 0 | 1  | 429 | 1   | 143 | 2.00E-60 | 188 |
| TcMYB14 | AtMYB76   | 46.23 | 199 | 107 | 0 | 1  | 597 | 1   | 199 | 1.00E-59 | 186 |
| TcMYB14 | ATMYB67   | 41.7  | 247 | 143 | 6 | 1  | 738 | 12  | 240 | 3.00E-59 | 184 |
| TcMYB14 | ATMYB14   | 66.1  | 118 | 40  | 0 | 1  | 354 | 1   | 118 | 2.00E-58 | 180 |
| TcMYB14 | AtMYB51   | 54.32 | 162 | 69  | 2 | 1  | 471 | 1   | 162 | 2.00E-58 | 183 |
| TcMYB14 | ATMYB15   | 68.1  | 116 | 37  | 0 | 1  | 348 | 1   | 116 | 9.00E-58 | 179 |
| TcMYB14 | ATMYB111  | 56.08 | 148 | 64  | 1 | 1  | 441 | 1   | 148 | 3.00E-57 | 180 |
| TcMYB14 | ATMYB12   | 67.24 | 116 | 38  | 0 | 1  | 348 | 1   | 116 | 3.00E-57 | 181 |
| TcMYB14 | ATMYB58   | 47    | 200 | 106 | 3 | 4  | 603 | 4   | 168 | 4.00E-57 | 177 |
| TcMYB14 | ATMYB34   | 58.96 | 134 | 55  | 0 | 1  | 402 | 1   | 134 | 6.00E-57 | 177 |
| TcMYB14 | AtMYB10   | 44.86 | 214 | 110 | 5 | 7  | 624 | 5   | 212 | 2.00E-56 | 174 |
| TcMYB14 | ATMYB55   | 60.14 | 143 | 45  | 1 | 1  | 393 | 1   | 143 | 3.00E-56 | 177 |
| TcMYB14 | ATMYB63   | 49.16 | 179 | 90  | 2 | 4  | 537 | 4   | 177 | 1.00E-55 | 174 |
| TcMYB14 | ATMYB11   | 65.52 | 116 | 40  | 0 | 1  | 348 | 1   | 116 | 1.00E-55 | 176 |
| TcMYB14 | ATMYB72   | 58.33 | 144 | 60  | 1 | 4  | 435 | 4   | 137 | 1.00E-55 | 174 |
| TcMYB14 | ATMYB122  | 54.49 | 156 | 71  | 1 | 1  | 468 | 1   | 155 | 5.00E-55 | 174 |
| TcMYB14 | AtMYB47   | 36.7  | 267 | 137 | 5 | 1  | 705 | 1   | 267 | 7.00E-55 | 171 |
| TcMYB14 | AtMYB60   | 62.3  | 122 | 46  | 0 | 1  | 366 | 1   | 122 | 3.00E-54 | 170 |
| TcMYB14 | ATMYB30   | 57.24 | 145 | 59  | 1 | 1  | 426 | 1   | 145 | 5.00E-54 | 171 |
| TcMYB14 | AtMYB103  | 61.86 | 118 | 45  | 0 | 1  | 354 | 1   | 118 | 7.00E-54 | 172 |
| TcMYB14 | ATMYB94   | 52.26 | 155 | 74  | 1 | 1  | 465 | 1   | 143 | 2.00E-53 | 170 |
| TcMYB14 | ATMYB96   | 45.07 | 213 | 106 | 3 | 1  | 606 | 1   | 213 | 1.00E-52 | 168 |
| TcMYB14 | ATMYB31   | 63.03 | 119 | 44  | 0 | 1  | 357 | 1   | 119 | 2.00E-52 | 167 |
| TcMYB14 | ATMYB26   | 60.32 | 126 | 41  | 1 | 1  | 351 | 1   | 126 | 3.00E-52 | 167 |
| TcMYB14 | ATMYB95   | 59.38 | 128 | 52  | 0 | 1  | 384 | 1   | 128 | 8.00E-52 | 164 |
| TcMYB14 | ATMYB3    | 38.97 | 213 | 123 | 3 | 34 | 651 | 20  | 224 | 1.00E-50 | 159 |
| TcMYB14 | AtMYB24   | 42.42 | 198 | 114 | 3 | 34 | 627 | 17  | 205 | 1.00E-49 | 156 |
| TcMYB14 | AtMYB83   | 36.43 | 269 | 154 | 6 | 22 | 777 | 26  | 281 | 1.00E-49 | 160 |
| TcMYB14 | ATMYB46   | 56.2  | 137 | 59  | 1 | 34 | 441 | 18  | 154 | 2.00E-49 | 158 |
| TcMYB14 | AtMYB116  | 57.89 | 114 | 48  | 0 | 37 | 378 | 19  | 132 | 4.00E-48 | 154 |
| TcMYB14 | ATMYB84   | 60.17 | 118 | 46  | 1 | 1  | 351 | 1   | 118 | 4.00E-48 | 155 |
| TcMYB14 | AtMYB79   | 42.51 | 207 | 91  | 3 | 37 | 573 | 7   | 209 | 5.00E-48 | 154 |
| TcMYB14 | AtMYB62   | 40.59 | 202 | 120 | 3 | 34 | 639 | 19  | 197 | 6.00E-48 | 154 |
| TcMYB14 | ATMYB38   | 51.39 | 144 | 68  | 2 | 1  | 426 | 1   | 144 | 9.00E-48 | 154 |
| TcMYB14 | AtMYB108  | 60    | 115 | 46  | 0 | 22 | 366 | 15  | 129 | 1.00E-47 | 154 |
| TcMYB14 | ATMYB68   | 59.32 | 118 | 47  | 1 | 1  | 351 | 1   | 118 | 2.00E-47 | 155 |
| TcMYB14 | ATMYB37   | 56.91 | 123 | 52  | 1 | 1  | 366 | 1   | 123 | 3.00E-47 | 154 |
| TcMYB14 | AtMYB36   | 45.98 | 174 | 93  | 3 | 1  | 519 | 1   | 154 | 4.00E-47 | 153 |
| TcMYB14 | ATMYB101  | 45.25 | 179 | 97  | 4 | 31 | 564 | 17  | 184 | 6.00E-47 | 156 |
| TcMYB14 | ATMYB57   | 40.7  | 199 | 117 | 4 | 34 | 627 | 25  | 193 | 6.00E-47 | 149 |
| TcMYB14 | AtMYB19   | 58.12 | 117 | 49  | 1 | 4  | 354 | 5   | 118 | 9.00E-47 | 150 |
| TcMYB14 | ATMYB71   | 62.86 | 105 | 39  | 0 | 31 | 345 | 17  | 121 | 9.00E-47 | 150 |
| TcMYB14 | ATMYB87   | 38.11 | 244 | 140 | 7 | 1  | 699 | 1   | 228 | 2.00E-46 | 151 |
| TcMYB14 | ATMYB48   | 37.61 | 234 | 146 | 4 | 31 | 732 | 6   | 215 | 5.00E-46 | 148 |
| TcMYB14 | AtMYB112  | 53.54 | 127 | 51  | 2 | 25 | 381 | 29  | 155 | 1.00E-45 | 147 |
| TcMYB14 | ATMYB120  | 43.65 | 181 | 97  | 2 | 34 | 561 | 26  | 205 | 1.00E-44 | 151 |
| TcMYB14 | ATMYB59-3 | 61.17 | 103 | 40  | 0 | 37 | 345 | 9   | 111 | 2.00E-44 | 143 |
| TcMYB14 | AtMYB18   | 39.8  | 201 | 119 | 4 | 37 | 633 | 11  | 204 | 1.00E-43 | 143 |
| TcMYB14 | ATMYB121  | 59.62 | 104 | 42  | 0 | 31 | 342 | 26  | 129 | 1.00E-43 | 142 |
| TcMYB14 | ATMYB33   | 57.41 | 108 | 46  | 0 | 22 | 345 | 28  | 135 | 2.00E-43 | 147 |
| TcMYB14 | ATMYB123  | 42.46 | 179 | 97  | 3 | 34 | 552 | 14  | 181 | 9.00E-43 | 140 |
| TcMYB14 | ATMYB65   | 57.69 | 104 | 44  | 0 | 34 | 345 | 41  | 144 | 1.00E-42 | 145 |
| TcMYB14 | ATMYB23   | 39.33 | 178 | 92  | 3 | 37 | 522 | 13  | 190 | 2.00E-42 | 138 |
| TcMYB14 | ATMYB2    | 52.59 | 116 | 55  | 0 | 34 | 381 | 20  | 135 | 8.00E-42 | 138 |
| TcMYB14 | ATMYB66   | 57.69 | 104 | 44  | 0 | 37 | 348 | 17  | 120 | 9.00E-42 | 135 |
| TcMYB14 | AtMYB97   | 53.57 | 112 | 52  | 1 | 28 | 363 | 17  | 127 | 9.00E-41 | 138 |
| TcMYB14 | AtMYB27   | 58.65 | 104 | 43  | 0 | 34 | 345 | 9   | 112 | 3.00E-40 | 133 |
| TcMYB14 | ATMYB0    | 54.29 | 105 | 48  | 0 | 37 | 351 | 15  | 119 | 4.00E-40 | 132 |
| TcMYB14 | AtMYB81   | 52.21 | 113 | 54  | 1 | 25 | 363 | 17  | 128 | 5.00E-40 | 137 |
| TcMYB14 | AtMYB114  | 56.19 | 105 | 46  | 0 | 31 | 345 | 7   | 111 | 5.00E-40 | 129 |
| TcMYB14 | ATMYB78   | 48.06 | 129 | 53  | 1 | 22 | 366 | 22  | 150 | 7.00E-40 | 134 |
| TcMYB14 | AtMYB82   | 54.81 | 104 | 47  | 0 | 34 | 345 | 12  | 115 | 1.00E-39 | 130 |
| TcMYB14 | AtMYB45   | 53.92 | 102 | 47  | 0 | 37 | 342 | 19  | 120 | 2.00E-39 | 131 |
| TcMYB14 | ATMYB75   | 56.19 | 105 | 46  | 0 | 31 | 345 | 7   | 111 | 2.00E-38 | 128 |
| TcMYB14 | ATMYB90   | 57.14 | 105 | 45  | 0 | 31 | 345 | 7   | 111 | 3.00E-38 | 128 |
| TcMYB14 | AtMYB113  | 54.29 | 105 | 48  | 0 | 31 | 345 | 7   | 111 | 8.00E-37 | 124 |
| TcMYB14 | ATMYB119  | 33.7  | 181 | 119 | 4 | 34 | 573 | 103 | 265 | 1.00E-29 | 108 |
| TcMYB14 | AtMYB104  | 46.88 | 96  | 51  | 0 | 40 | 327 | 18  | 113 | 1.00E-28 | 105 |
| TcMYB14 | AtMYB64   | 47.42 | 97  | 50  | 2 | 40 | 327 | 105 | 199 | 1.00E-28 | 105 |

|         |           |       |     |     |   |     |     |     |     |          |      |
|---------|-----------|-------|-----|-----|---|-----|-----|-----|-----|----------|------|
| TcMYB14 | AtMYB109  | 35.96 | 178 | 89  | 5 | 40  | 498 | 56  | 230 | 4.00E-27 | 101  |
| TcMYB14 | AtMYB98   | 42.34 | 111 | 63  | 2 | 25  | 354 | 212 | 320 | 5.00E-27 | 101  |
| TcMYB14 | ATMYB73   | 46.6  | 103 | 54  | 2 | 40  | 345 | 13  | 113 | 7.00E-27 | 99.8 |
| TcMYB14 | ATMYB25   | 47.57 | 103 | 53  | 2 | 40  | 345 | 50  | 150 | 3.00E-26 | 98.6 |
| TcMYB14 | AtMYB70   | 46.6  | 103 | 54  | 2 | 40  | 345 | 13  | 113 | 4.00E-26 | 97.4 |
| TcMYB14 | ATMYB118  | 43.7  | 119 | 64  | 3 | 7   | 354 | 176 | 292 | 5.00E-26 | 99   |
| TcMYB14 | ATMYB118  | 24.68 | 77  | 51  | 3 | 151 | 360 | 169 | 243 | 8.00E-05 | 35.8 |
| TcMYB14 | ATMYB77   | 43.69 | 103 | 57  | 2 | 40  | 345 | 6   | 106 | 7.00E-26 | 96.7 |
| TcMYB14 | ATMYB44   | 43.69 | 103 | 57  | 2 | 40  | 345 | 6   | 106 | 3.00E-25 | 95.1 |
| TcMYB14 | AtMYB1    | 43.81 | 105 | 58  | 2 | 40  | 351 | 55  | 157 | 2.00E-24 | 94   |
| TcMYB14 | AtMYB1    | 31.03 | 58  | 39  | 1 | 184 | 354 | 50  | 107 | 6.00E-04 | 33.1 |
| TcMYB14 | AtMYB115  | 41.67 | 96  | 56  | 1 | 40  | 327 | 158 | 252 | 5.00E-24 | 92.4 |
| TcMYB14 | AtMYB100  | 26.58 | 222 | 138 | 7 | 25  | 615 | 21  | 234 | 4.00E-23 | 87.8 |
| TcMYB14 | ATMYB105  | 40.74 | 108 | 63  | 2 | 25  | 345 | 102 | 207 | 5.00E-23 | 89.4 |
| TcMYB14 | ATMYB52   | 40.78 | 103 | 60  | 2 | 40  | 345 | 5   | 105 | 7.00E-22 | 84.7 |
| TcMYB14 | AtMYB117  | 40.95 | 105 | 61  | 2 | 34  | 345 | 96  | 198 | 8.00E-22 | 86.3 |
| TcMYB14 | ATMYB54   | 40.78 | 103 | 60  | 2 | 40  | 345 | 6   | 106 | 9.00E-22 | 84.3 |
| TcMYB14 | AtMYB56   | 37.25 | 102 | 64  | 1 | 40  | 345 | 93  | 193 | 9.00E-20 | 80.1 |
| TcMYB14 | ATMYB91   | 36.63 | 101 | 62  | 1 | 49  | 345 | 7   | 107 | 2.00E-19 | 79.7 |
| TcMYB14 | ATMYB110  | 35.58 | 104 | 66  | 2 | 40  | 348 | 67  | 168 | 3.00E-19 | 78.6 |
| TcMYB14 | ATMYB69   | 34.21 | 114 | 74  | 3 | 7   | 345 | 13  | 119 | 6.00E-19 | 76.6 |
| TcMYB14 | AtMYB22   | 35.29 | 102 | 66  | 1 | 25  | 330 | 49  | 148 | 1.00E-18 | 75.9 |
| TcMYB14 | ATMYB88   | 37.37 | 99  | 62  | 1 | 49  | 345 | 33  | 130 | 1.00E-16 | 71.6 |
| TcMYB14 | AtMYB89   | 30.91 | 110 | 76  | 1 | 43  | 372 | 57  | 165 | 2.00E-16 | 68.6 |
| TcMYB14 | AtMYB124  | 37.37 | 99  | 62  | 1 | 49  | 345 | 28  | 125 | 4.00E-16 | 70.1 |
| TcMYB15 | ATMYB105  | 78.63 | 131 | 28  | 1 | 124 | 516 | 90  | 219 | 1.00E-70 | 218  |
| TcMYB15 | AtMYB117  | 70.55 | 146 | 41  | 1 | 85  | 516 | 65  | 210 | 5.00E-70 | 217  |
| TcMYB15 | AtMYB56   | 59.51 | 163 | 66  | 0 | 106 | 594 | 69  | 231 | 9.00E-67 | 207  |
| TcMYB15 | ATMYB52   | 76.32 | 114 | 27  | 0 | 169 | 510 | 2   | 115 | 5.00E-64 | 198  |
| TcMYB15 | ATMYB54   | 65.97 | 144 | 49  | 1 | 169 | 600 | 3   | 144 | 6.00E-64 | 197  |
| TcMYB15 | ATMYB110  | 66.67 | 135 | 45  | 1 | 109 | 513 | 45  | 178 | 1.00E-61 | 194  |
| TcMYB15 | ATMYB69   | 73.58 | 106 | 28  | 0 | 172 | 489 | 17  | 122 | 4.00E-56 | 177  |
| TcMYB15 | AtMYB89   | 52.14 | 140 | 67  | 1 | 76  | 495 | 33  | 161 | 4.00E-47 | 152  |
| TcMYB15 | AtMYB109  | 45.89 | 146 | 79  | 2 | 61  | 498 | 42  | 162 | 6.00E-41 | 142  |
| TcMYB15 | ATMYB25   | 55.24 | 105 | 47  | 0 | 178 | 492 | 50  | 154 | 7.00E-40 | 138  |
| TcMYB15 | ATMYB44   | 55.45 | 101 | 45  | 0 | 178 | 480 | 6   | 106 | 9.00E-39 | 134  |
| TcMYB15 | AtMYB70   | 55.45 | 101 | 45  | 0 | 178 | 480 | 13  | 113 | 1.00E-37 | 131  |
| TcMYB15 | AtMYB1    | 45.39 | 141 | 77  | 2 | 61  | 483 | 26  | 156 | 7.00E-37 | 130  |
| TcMYB15 | ATMYB73   | 52.48 | 101 | 48  | 0 | 178 | 480 | 13  | 113 | 1.00E-36 | 128  |
| TcMYB15 | ATMYB77   | 52.48 | 101 | 48  | 0 | 178 | 480 | 6   | 106 | 6.00E-36 | 126  |
| TcMYB15 | ATMYB119  | 42.07 | 145 | 79  | 2 | 79  | 498 | 73  | 216 | 3.00E-32 | 119  |
| TcMYB15 | ATMYB66   | 34.22 | 187 | 108 | 5 | 178 | 693 | 18  | 203 | 9.00E-32 | 112  |
| TcMYB15 | AtMYB64   | 44.44 | 135 | 75  | 1 | 178 | 582 | 105 | 227 | 2.00E-30 | 114  |
| TcMYB15 | ATMYB23   | 48.04 | 102 | 52  | 1 | 178 | 480 | 14  | 115 | 1.00E-29 | 107  |
| TcMYB15 | ATMYB118  | 47.17 | 106 | 56  | 0 | 178 | 495 | 189 | 294 | 6.00E-29 | 109  |
| TcMYB15 | ATMYB67   | 45.31 | 128 | 63  | 3 | 130 | 492 | 3   | 129 | 1.00E-28 | 106  |
| TcMYB15 | ATMYB0    | 47.06 | 102 | 53  | 1 | 178 | 480 | 16  | 117 | 1.00E-28 | 104  |
| TcMYB15 | AtMYB115  | 43.12 | 109 | 62  | 0 | 151 | 477 | 149 | 257 | 1.00E-28 | 107  |
| TcMYB15 | ATMYB15   | 35.75 | 179 | 98  | 5 | 178 | 663 | 14  | 187 | 2.00E-28 | 105  |
| TcMYB15 | AtMYB10   | 46.3  | 108 | 56  | 2 | 178 | 495 | 16  | 122 | 2.00E-28 | 104  |
| TcMYB15 | AtMYB100  | 45.45 | 99  | 53  | 2 | 184 | 477 | 28  | 125 | 3.00E-28 | 103  |
| TcMYB15 | AtMYB103  | 47.01 | 117 | 60  | 2 | 178 | 522 | 14  | 129 | 3.00E-28 | 106  |
| TcMYB15 | ATMYB63   | 46.3  | 108 | 56  | 2 | 178 | 495 | 16  | 122 | 3.00E-28 | 105  |
| TcMYB15 | ATMYB121  | 41.26 | 143 | 77  | 3 | 160 | 567 | 23  | 164 | 5.00E-28 | 104  |
| TcMYB15 | AtMYB19   | 47.12 | 104 | 53  | 2 | 178 | 483 | 14  | 116 | 8.00E-28 | 103  |
| TcMYB15 | AtMYB27   | 44.25 | 113 | 61  | 3 | 178 | 510 | 11  | 120 | 8.00E-28 | 102  |
| TcMYB15 | AtMYB98   | 42.37 | 118 | 68  | 0 | 178 | 531 | 217 | 334 | 2.00E-27 | 105  |
| TcMYB15 | AtMYB18   | 37.31 | 134 | 82  | 2 | 178 | 573 | 12  | 144 | 4.00E-27 | 102  |
| TcMYB15 | ATMYB58   | 36.03 | 136 | 86  | 1 | 178 | 582 | 16  | 151 | 4.00E-27 | 101  |
| TcMYB15 | AtMYB51   | 47.06 | 102 | 53  | 1 | 178 | 480 | 15  | 116 | 4.00E-27 | 103  |
| TcMYB15 | AtMYB104  | 39.68 | 126 | 75  | 1 | 178 | 552 | 18  | 143 | 5.00E-27 | 103  |
| TcMYB15 | AtMYB45   | 34.97 | 163 | 95  | 4 | 178 | 633 | 20  | 181 | 6.00E-27 | 100  |
| TcMYB15 | AtMYB82   | 46.08 | 102 | 54  | 1 | 178 | 480 | 14  | 115 | 1.00E-26 | 98.6 |
| TcMYB15 | ATMYB13   | 38.82 | 152 | 83  | 5 | 178 | 603 | 14  | 164 | 2.00E-26 | 99.4 |
| TcMYB15 | ATMYB80   | 46.6  | 103 | 53  | 2 | 178 | 480 | 14  | 115 | 2.00E-26 | 100  |
| TcMYB15 | AtMYB97   | 38.73 | 142 | 86  | 2 | 178 | 600 | 21  | 159 | 3.00E-26 | 101  |
| TcMYB15 | ATMYB35   | 39.39 | 132 | 79  | 2 | 178 | 570 | 14  | 143 | 4.00E-26 | 99.8 |
| TcMYB15 | ATMYB33   | 34.36 | 163 | 106 | 2 | 85  | 570 | 10  | 165 | 5.00E-26 | 102  |
| TcMYB15 | ATMYB72   | 44.04 | 109 | 59  | 2 | 178 | 498 | 16  | 123 | 6.00E-26 | 99   |
| TcMYB15 | AtMYB40   | 45.71 | 105 | 55  | 2 | 178 | 486 | 14  | 117 | 8.00E-26 | 97.8 |
| TcMYB15 | AtMYB81   | 41.22 | 131 | 76  | 2 | 115 | 504 | 9   | 131 | 9.00E-26 | 100  |
| TcMYB15 | ATMYB101  | 41.73 | 127 | 72  | 3 | 157 | 531 | 13  | 134 | 1.00E-25 | 100  |
| TcMYB15 | AtMYB53   | 47.57 | 103 | 52  | 2 | 178 | 480 | 14  | 115 | 1.00E-25 | 98.6 |
| TcMYB15 | ATMYB59-3 | 37.93 | 145 | 88  | 3 | 178 | 606 | 10  | 152 | 1.00E-25 | 96.7 |
| TcMYB15 | ATMYB48   | 44.86 | 107 | 57  | 2 | 178 | 492 | 9   | 114 | 2.00E-25 | 96.7 |
| TcMYB15 | ATMYB46   | 40    | 115 | 67  | 2 | 160 | 498 | 14  | 127 | 2.00E-25 | 97.1 |
| TcMYB15 | AtMYB49   | 45.1  | 102 | 55  | 1 | 178 | 480 | 14  | 115 | 3.00E-25 | 97.4 |
| TcMYB15 | AtMYB41   | 44.12 | 102 | 56  | 1 | 178 | 480 | 14  | 115 | 3.00E-25 | 96.7 |
| TcMYB15 | AtMYB36   | 40    | 140 | 82  | 5 | 178 | 591 | 14  | 142 | 4.00E-25 | 97.4 |
| TcMYB15 | ATMYB68   | 37.76 | 143 | 84  | 4 | 178 | 591 | 14  | 152 | 4.00E-25 | 97.8 |

|         |          |       |     |     |   |     |     |    |     |          |      |
|---------|----------|-------|-----|-----|---|-----|-----|----|-----|----------|------|
| TcMYB15 | ATMYB95  | 43.69 | 103 | 56  | 2 | 178 | 480 | 14 | 115 | 5.00E-25 | 95.9 |
| TcMYB15 | ATMYB122 | 46.88 | 96  | 50  | 1 | 178 | 462 | 14 | 109 | 5.00E-25 | 97.1 |
| TcMYB15 | ATMYB120 | 36.91 | 149 | 93  | 3 | 61  | 504 | 7  | 137 | 5.00E-25 | 99   |
| TcMYB15 | ATMYB34  | 41.38 | 116 | 67  | 2 | 148 | 492 | 9  | 119 | 5.00E-25 | 96.3 |
| TcMYB15 | AtMYB79  | 40.8  | 125 | 72  | 2 | 178 | 546 | 8  | 131 | 6.00E-25 | 95.5 |
| TcMYB15 | ATMYB65  | 35    | 140 | 86  | 2 | 100 | 504 | 13 | 152 | 6.00E-25 | 99   |
| TcMYB15 | ATMYB5   | 42.45 | 106 | 60  | 1 | 178 | 492 | 25 | 130 | 8.00E-25 | 94.7 |
| TcMYB15 | AtMYB114 | 40.78 | 103 | 60  | 1 | 178 | 483 | 10 | 112 | 8.00E-25 | 91.7 |
| TcMYB15 | ATMYB86  | 42.99 | 107 | 59  | 2 | 178 | 492 | 14 | 119 | 9.00E-25 | 96.7 |
| TcMYB15 | AtMYB32  | 38.93 | 131 | 78  | 2 | 178 | 564 | 14 | 143 | 1.00E-24 | 95.1 |
| TcMYB15 | ATMYB3   | 45.63 | 103 | 54  | 2 | 178 | 480 | 14 | 115 | 1.00E-24 | 94.7 |
| TcMYB15 | MYB8     | 42.16 | 102 | 58  | 1 | 178 | 480 | 14 | 115 | 1.00E-24 | 93.6 |
| TcMYB15 | ATMYB61  | 37.93 | 145 | 87  | 4 | 178 | 603 | 14 | 151 | 1.00E-24 | 96.7 |
| TcMYB15 | AtMYB107 | 45.1  | 102 | 55  | 1 | 178 | 480 | 14 | 115 | 1.00E-24 | 95.9 |
| TcMYB15 | ATMYB92  | 46.6  | 103 | 53  | 2 | 178 | 480 | 14 | 115 | 1.00E-24 | 95.9 |
| TcMYB15 | AtMYB9   | 45.1  | 102 | 55  | 1 | 178 | 480 | 14 | 115 | 1.00E-24 | 95.9 |
| TcMYB15 | ATMYB71  | 39.84 | 123 | 72  | 2 | 178 | 540 | 20 | 141 | 2.00E-24 | 94.4 |
| TcMYB15 | ATMYB84  | 43.69 | 103 | 56  | 2 | 178 | 480 | 14 | 116 | 2.00E-24 | 95.1 |
| TcMYB15 | AtMYB116 | 37.88 | 132 | 80  | 3 | 148 | 537 | 13 | 140 | 2.00E-24 | 94.4 |
| TcMYB15 | ATMYB14  | 42.61 | 115 | 64  | 2 | 178 | 516 | 14 | 127 | 2.00E-24 | 93.6 |
| TcMYB15 | AtMYB74  | 44.66 | 103 | 55  | 2 | 178 | 480 | 15 | 116 | 3.00E-24 | 94.7 |
| TcMYB15 | ATMYB123 | 36.55 | 145 | 91  | 4 | 178 | 609 | 16 | 141 | 4.00E-24 | 93.2 |
| TcMYB15 | ATMYB4   | 44.66 | 103 | 55  | 2 | 178 | 480 | 14 | 115 | 4.00E-24 | 93.6 |
| TcMYB15 | ATMYB55  | 33.14 | 175 | 84  | 5 | 178 | 603 | 14 | 185 | 4.00E-24 | 94.7 |
| TcMYB15 | AtMYB22  | 32.39 | 142 | 90  | 3 | 103 | 510 | 23 | 163 | 6.00E-24 | 92.4 |
| TcMYB15 | AtMYB50  | 43.69 | 103 | 56  | 2 | 178 | 480 | 14 | 115 | 6.00E-24 | 93.6 |
| TcMYB15 | ATMYB2   | 47.37 | 95  | 49  | 1 | 178 | 459 | 22 | 116 | 9.00E-24 | 92.4 |
| TcMYB15 | ATMYB28  | 43.4  | 106 | 59  | 1 | 178 | 492 | 14 | 119 | 9.00E-24 | 94   |
| TcMYB15 | AtMYB83  | 41.67 | 108 | 62  | 1 | 178 | 498 | 32 | 139 | 1.00E-23 | 93.6 |
| TcMYB15 | AtMYB17  | 44.66 | 103 | 55  | 2 | 178 | 480 | 14 | 115 | 1.00E-23 | 92.8 |
| TcMYB15 | ATMYB75  | 40.78 | 103 | 60  | 1 | 178 | 483 | 10 | 112 | 1.00E-23 | 91.7 |
| TcMYB15 | AtMYB47  | 40.78 | 103 | 59  | 2 | 178 | 480 | 14 | 115 | 1.00E-23 | 92   |
| TcMYB15 | ATMYB106 | 44.66 | 103 | 55  | 2 | 178 | 480 | 57 | 158 | 1.00E-23 | 94   |
| TcMYB15 | AtMYB6   | 42.72 | 103 | 57  | 2 | 178 | 480 | 14 | 115 | 1.00E-23 | 91.3 |
| TcMYB15 | AtMYB112 | 41.44 | 111 | 64  | 2 | 130 | 459 | 19 | 128 | 1.00E-23 | 91.3 |
| TcMYB15 | ATMYB90  | 34.9  | 149 | 93  | 2 | 178 | 612 | 10 | 158 | 1.00E-23 | 91.3 |
| TcMYB15 | ATMYB94  | 41.67 | 108 | 62  | 1 | 178 | 498 | 14 | 121 | 2.00E-23 | 92.8 |
| TcMYB15 | ATMYB30  | 36.69 | 139 | 87  | 2 | 178 | 591 | 14 | 146 | 2.00E-23 | 92.4 |
| TcMYB15 | ATMYB102 | 44.66 | 103 | 55  | 2 | 178 | 480 | 14 | 115 | 3.00E-23 | 92.4 |
| TcMYB15 | AtMYB62  | 34.87 | 152 | 87  | 4 | 178 | 597 | 21 | 171 | 3.00E-23 | 91.3 |
| TcMYB15 | MYB7     | 41.75 | 103 | 58  | 2 | 178 | 480 | 14 | 115 | 4.00E-23 | 90.5 |
| TcMYB15 | AtMYB93  | 43.14 | 102 | 57  | 1 | 178 | 480 | 14 | 115 | 4.00E-23 | 92   |
| TcMYB15 | ATMYB38  | 43.69 | 103 | 56  | 2 | 178 | 480 | 14 | 116 | 5.00E-23 | 90.9 |
| TcMYB15 | ATMYB16  | 42.16 | 102 | 58  | 1 | 178 | 480 | 14 | 115 | 5.00E-23 | 91.3 |
| TcMYB15 | ATMYB96  | 38.06 | 134 | 80  | 2 | 178 | 570 | 14 | 147 | 5.00E-23 | 91.7 |
| TcMYB15 | AtMYB60  | 37.14 | 140 | 78  | 3 | 178 | 567 | 14 | 153 | 6.00E-23 | 90.1 |
| TcMYB15 | AtMYB43  | 39.2  | 125 | 74  | 2 | 178 | 546 | 14 | 137 | 7.00E-23 | 90.9 |
| TcMYB15 | AtMYB76  | 45.1  | 102 | 55  | 1 | 178 | 480 | 14 | 115 | 8.00E-23 | 90.9 |
| TcMYB15 | ATMYB31  | 44.12 | 102 | 56  | 1 | 178 | 480 | 14 | 115 | 1.00E-22 | 90.5 |
| TcMYB15 | AtMYB113 | 38.68 | 106 | 64  | 1 | 178 | 492 | 10 | 115 | 1.00E-22 | 88.6 |
| TcMYB15 | ATMYB57  | 29.89 | 174 | 120 | 4 | 178 | 693 | 27 | 188 | 1.00E-22 | 87.4 |
| TcMYB15 | ATMYB3   | 41.28 | 109 | 63  | 2 | 178 | 501 | 22 | 129 | 2.00E-22 | 87.8 |
| TcMYB15 | AtMYB108 | 43.52 | 108 | 59  | 3 | 142 | 459 | 12 | 115 | 2.00E-22 | 89.7 |
| TcMYB15 | ATMYB111 | 37.14 | 140 | 87  | 2 | 178 | 594 | 14 | 151 | 2.00E-22 | 89.7 |
| TcMYB15 | ATMYB29  | 45.83 | 96  | 51  | 1 | 178 | 462 | 14 | 109 | 3.00E-22 | 89.4 |
| TcMYB15 | ATMYB37  | 40    | 110 | 63  | 2 | 178 | 498 | 14 | 122 | 4.00E-22 | 88.6 |
| TcMYB15 | AtMYB20  | 41.51 | 106 | 60  | 2 | 178 | 489 | 14 | 118 | 8.00E-22 | 87   |
| TcMYB15 | AtMYB42  | 42.72 | 103 | 57  | 2 | 178 | 480 | 14 | 115 | 9.00E-22 | 87   |
| TcMYB15 | ATMYB11  | 34.56 | 136 | 76  | 2 | 178 | 546 | 14 | 149 | 2.00E-21 | 87   |
| TcMYB15 | AtMYB85  | 42.72 | 103 | 57  | 2 | 178 | 480 | 14 | 115 | 2.00E-21 | 85.5 |
| TcMYB15 | AtMYB24  | 42.11 | 95  | 54  | 1 | 178 | 459 | 19 | 113 | 2.00E-21 | 84.3 |
| TcMYB15 | ATMYB26  | 39.64 | 111 | 57  | 2 | 178 | 480 | 14 | 124 | 2.00E-21 | 87   |
| TcMYB15 | ATMYB12  | 40.2  | 102 | 60  | 1 | 178 | 480 | 14 | 115 | 4.00E-21 | 86.3 |
| TcMYB15 | ATMYB88  | 36.89 | 103 | 65  | 0 | 187 | 495 | 33 | 135 | 6.00E-21 | 86.7 |
| TcMYB15 | ATMYB87  | 38.83 | 103 | 61  | 2 | 178 | 480 | 14 | 116 | 7.00E-21 | 84.7 |
| TcMYB15 | AtMYB124 | 36.89 | 103 | 65  | 0 | 187 | 495 | 28 | 130 | 9.00E-21 | 85.9 |
| TcMYB15 | ATMYB99  | 42.73 | 110 | 54  | 4 | 178 | 480 | 15 | 123 | 3.00E-20 | 82   |
| TcMYB15 | ATMYB91  | 35.9  | 117 | 72  | 1 | 178 | 519 | 4  | 120 | 6.00E-20 | 82.8 |
| TcMYB15 | ATMYB78  | 34.51 | 142 | 78  | 4 | 79  | 459 | 2  | 136 | 1.00E-19 | 81.3 |
| TcMYB16 | AtMYB20  | 84.62 | 130 | 20  | 0 | 1   | 390 | 1  | 130 | 2.00E-84 | 252  |
| TcMYB16 | AtMYB43  | 75.69 | 144 | 35  | 0 | 1   | 432 | 1  | 144 | 9.00E-83 | 249  |
| TcMYB16 | AtMYB42  | 65    | 180 | 62  | 2 | 1   | 537 | 1  | 179 | 1.00E-82 | 248  |
| TcMYB16 | AtMYB85  | 58.14 | 215 | 73  | 4 | 1   | 594 | 1  | 214 | 1.00E-82 | 247  |
| TcMYB16 | AtMYB40  | 56.04 | 207 | 88  | 3 | 1   | 612 | 1  | 202 | 1.00E-77 | 234  |
| TcMYB16 | AtMYB107 | 75.19 | 133 | 33  | 0 | 1   | 399 | 1  | 133 | 2.00E-71 | 219  |
| TcMYB16 | AtMYB9   | 72.93 | 133 | 36  | 0 | 1   | 399 | 1  | 133 | 1.00E-69 | 216  |
| TcMYB16 | ATMYB16  | 60.36 | 169 | 67  | 3 | 1   | 507 | 1  | 166 | 1.00E-69 | 215  |
| TcMYB16 | ATMYB99  | 58.52 | 176 | 57  | 2 | 4   | 483 | 3  | 178 | 2.00E-69 | 212  |
| TcMYB16 | AtMYB93  | 45.29 | 276 | 134 | 4 | 1   | 777 | 1  | 271 | 4.00E-69 | 215  |
| TcMYB16 | AtMYB17  | 70.54 | 129 | 38  | 0 | 1   | 387 | 1  | 129 | 4.00E-68 | 211  |

|         |          |       |     |     |   |    |     |    |     |          |     |
|---------|----------|-------|-----|-----|---|----|-----|----|-----|----------|-----|
| TcMYB16 | ATMYB102 | 70.99 | 131 | 38  | 0 | 1  | 393 | 1  | 131 | 1.00E-66 | 208 |
| TcMYB16 | AtMYB6   | 69.47 | 131 | 40  | 0 | 1  | 393 | 1  | 131 | 1.00E-66 | 204 |
| TcMYB16 | ATMYB106 | 53.8  | 184 | 81  | 3 | 13 | 552 | 48 | 228 | 2.00E-66 | 209 |
| TcMYB16 | AtMYB41  | 49.32 | 219 | 94  | 2 | 1  | 606 | 1  | 219 | 4.00E-66 | 205 |
| TcMYB16 | ATMYB61  | 55.85 | 188 | 71  | 2 | 1  | 528 | 1  | 188 | 5.00E-66 | 207 |
| TcMYB16 | ATMYB92  | 69.47 | 131 | 40  | 0 | 1  | 393 | 1  | 131 | 6.00E-66 | 206 |
| TcMYB16 | AtMYB53  | 68.42 | 133 | 42  | 0 | 1  | 399 | 1  | 133 | 6.00E-66 | 205 |
| TcMYB16 | AtMYB50  | 49.25 | 201 | 101 | 2 | 1  | 600 | 1  | 194 | 4.00E-65 | 203 |
| TcMYB16 | ATMYB4   | 67.18 | 131 | 43  | 0 | 1  | 393 | 1  | 131 | 6.00E-65 | 202 |
| TcMYB16 | MYB7     | 66.41 | 131 | 44  | 0 | 1  | 393 | 1  | 131 | 2.00E-64 | 200 |
| TcMYB16 | AtMYB74  | 70.45 | 132 | 38  | 1 | 1  | 393 | 1  | 132 | 3.00E-64 | 201 |
| TcMYB16 | AtMYB32  | 55.25 | 181 | 81  | 3 | 1  | 543 | 1  | 171 | 5.00E-64 | 199 |
| TcMYB16 | MYB8     | 67.18 | 131 | 43  | 0 | 1  | 393 | 1  | 131 | 6.00E-64 | 197 |
| TcMYB16 | ATMYB86  | 66.67 | 138 | 45  | 1 | 1  | 411 | 1  | 138 | 1.00E-63 | 201 |
| TcMYB16 | ATMYB3   | 65.41 | 133 | 46  | 0 | 1  | 399 | 1  | 133 | 7.00E-63 | 196 |
| TcMYB16 | ATMYB15  | 50.49 | 206 | 81  | 4 | 1  | 555 | 1  | 200 | 4.00E-62 | 194 |
| TcMYB16 | ATMYB5   | 66.4  | 125 | 42  | 0 | 13 | 387 | 16 | 140 | 1.00E-61 | 192 |
| TcMYB16 | ATMYB80  | 59.86 | 147 | 55  | 1 | 1  | 429 | 1  | 147 | 1.00E-61 | 194 |
| TcMYB16 | ATMYB28  | 58.44 | 154 | 64  | 1 | 1  | 462 | 1  | 151 | 4.00E-61 | 194 |
| TcMYB16 | AtMYB76  | 49.75 | 201 | 101 | 3 | 1  | 603 | 1  | 187 | 1.00E-60 | 192 |
| TcMYB16 | AtMYB49  | 67.97 | 128 | 41  | 0 | 1  | 384 | 1  | 128 | 5.00E-60 | 190 |
| TcMYB16 | ATMYB29  | 52.06 | 194 | 81  | 4 | 1  | 546 | 1  | 188 | 5.00E-60 | 191 |
| TcMYB16 | ATMYB13  | 49.22 | 193 | 94  | 2 | 1  | 567 | 1  | 175 | 9.00E-60 | 187 |
| TcMYB16 | ATMYB35  | 58.5  | 147 | 60  | 1 | 1  | 438 | 1  | 147 | 2.00E-59 | 189 |
| TcMYB16 | ATMYB122 | 44.25 | 226 | 111 | 1 | 1  | 633 | 1  | 226 | 8.00E-59 | 187 |
| TcMYB16 | AtMYB51  | 50.77 | 195 | 95  | 3 | 1  | 582 | 1  | 193 | 2.00E-58 | 187 |
| TcMYB16 | ATMYB55  | 51.31 | 191 | 77  | 3 | 1  | 525 | 1  | 190 | 3.00E-58 | 186 |
| TcMYB16 | ATMYB14  | 69.49 | 118 | 36  | 0 | 1  | 354 | 1  | 118 | 1.00E-57 | 182 |
| TcMYB16 | ATMYB34  | 57.33 | 150 | 59  | 1 | 1  | 435 | 1  | 150 | 2.00E-57 | 182 |
| TcMYB16 | ATMYB111 | 68.1  | 116 | 37  | 0 | 1  | 348 | 1  | 116 | 3.00E-57 | 184 |
| TcMYB16 | ATMYB12  | 44.2  | 224 | 79  | 3 | 1  | 534 | 1  | 224 | 3.00E-57 | 184 |
| TcMYB16 | ATMYB67  | 46.7  | 182 | 97  | 1 | 16 | 561 | 16 | 194 | 4.00E-57 | 182 |
| TcMYB16 | ATMYB11  | 45.5  | 222 | 116 | 4 | 1  | 651 | 1  | 214 | 6.00E-57 | 183 |
| TcMYB16 | ATMYB58  | 69.57 | 115 | 35  | 0 | 4  | 348 | 4  | 118 | 4.00E-56 | 179 |
| TcMYB16 | AtMYB10  | 56.16 | 146 | 64  | 0 | 7  | 444 | 5  | 150 | 5.00E-56 | 177 |
| TcMYB16 | ATMYB72  | 40.07 | 287 | 129 | 7 | 4  | 735 | 4  | 289 | 1.00E-55 | 178 |
| TcMYB16 | AtMYB47  | 43.72 | 215 | 108 | 3 | 1  | 606 | 1  | 214 | 2.00E-55 | 177 |
| TcMYB16 | ATMYB63  | 68.7  | 115 | 36  | 0 | 4  | 348 | 4  | 118 | 4.00E-55 | 177 |
| TcMYB16 | ATMYB96  | 41.3  | 247 | 140 | 6 | 1  | 726 | 1  | 206 | 9.00E-55 | 177 |
| TcMYB16 | ATMYB94  | 45.16 | 217 | 117 | 5 | 1  | 645 | 1  | 194 | 2.00E-54 | 176 |
| TcMYB16 | AtMYB103 | 48.6  | 179 | 92  | 1 | 1  | 537 | 1  | 178 | 3.00E-54 | 177 |
| TcMYB16 | ATMYB30  | 55.86 | 145 | 64  | 1 | 1  | 435 | 1  | 143 | 3.00E-54 | 175 |
| TcMYB16 | AtMYB60  | 63.11 | 122 | 45  | 0 | 1  | 366 | 1  | 122 | 5.00E-54 | 173 |
| TcMYB16 | ATMYB31  | 64.66 | 116 | 41  | 0 | 1  | 348 | 1  | 116 | 6.00E-52 | 169 |
| TcMYB16 | ATMYB95  | 41.67 | 216 | 111 | 4 | 1  | 603 | 1  | 215 | 5.00E-51 | 165 |
| TcMYB16 | ATMYB26  | 63.2  | 125 | 37  | 1 | 1  | 348 | 1  | 125 | 8.00E-51 | 167 |
| TcMYB16 | ATMYB46  | 67.59 | 108 | 35  | 0 | 34 | 357 | 18 | 125 | 2.00E-49 | 161 |
| TcMYB16 | AtMYB83  | 65.45 | 110 | 38  | 0 | 22 | 351 | 26 | 135 | 3.00E-48 | 160 |
| TcMYB16 | ATMYB84  | 61.54 | 117 | 44  | 1 | 1  | 348 | 1  | 117 | 2.00E-47 | 157 |
| TcMYB16 | AtMYB19  | 66.99 | 103 | 34  | 0 | 37 | 345 | 13 | 115 | 2.00E-47 | 155 |
| TcMYB16 | ATMYB71  | 43.28 | 201 | 114 | 2 | 31 | 633 | 17 | 196 | 6.00E-47 | 154 |
| TcMYB16 | AtMYB108 | 39.41 | 203 | 112 | 2 | 22 | 597 | 15 | 216 | 2.00E-46 | 155 |
| TcMYB16 | ATMYB3   | 44.39 | 187 | 98  | 3 | 34 | 576 | 20 | 198 | 3.00E-46 | 151 |
| TcMYB16 | AtMYB79  | 66.67 | 105 | 35  | 0 | 37 | 351 | 7  | 111 | 6.00E-46 | 152 |
| TcMYB16 | ATMYB68  | 60.68 | 117 | 45  | 1 | 1  | 348 | 1  | 117 | 6.00E-46 | 155 |
| TcMYB16 | AtMYB36  | 53.1  | 145 | 67  | 3 | 1  | 432 | 1  | 141 | 6.00E-46 | 154 |
| TcMYB16 | ATMYB57  | 57.76 | 116 | 49  | 0 | 34 | 381 | 25 | 140 | 9.00E-46 | 149 |
| TcMYB16 | AtMYB62  | 43.98 | 191 | 105 | 3 | 34 | 600 | 19 | 189 | 1.00E-45 | 152 |
| TcMYB16 | ATMYB37  | 45.11 | 184 | 87  | 5 | 1  | 510 | 1  | 182 | 1.00E-45 | 153 |
| TcMYB16 | ATMYB87  | 58.97 | 117 | 47  | 1 | 1  | 348 | 1  | 117 | 2.00E-45 | 152 |
| TcMYB16 | ATMYB38  | 46.06 | 165 | 82  | 3 | 1  | 474 | 1  | 165 | 2.00E-45 | 151 |
| TcMYB16 | ATMYB101 | 45.56 | 180 | 98  | 4 | 31 | 570 | 17 | 185 | 5.00E-45 | 155 |
| TcMYB16 | AtMYB18  | 65.05 | 103 | 36  | 0 | 37 | 345 | 11 | 113 | 1.00E-44 | 149 |
| TcMYB16 | AtMYB112 | 57.02 | 114 | 49  | 0 | 25 | 366 | 29 | 142 | 1.00E-44 | 147 |
| TcMYB16 | AtMYB116 | 56.52 | 115 | 50  | 0 | 37 | 381 | 19 | 133 | 3.00E-44 | 148 |
| TcMYB16 | ATMYB33  | 59.65 | 114 | 46  | 1 | 22 | 363 | 28 | 140 | 1.00E-43 | 151 |
| TcMYB16 | ATMYB120 | 61.68 | 107 | 41  | 0 | 34 | 354 | 26 | 132 | 2.00E-43 | 151 |
| TcMYB16 | ATMYB121 | 61.68 | 107 | 41  | 0 | 31 | 351 | 26 | 132 | 3.00E-43 | 145 |
| TcMYB16 | AtMYB24  | 59.63 | 109 | 44  | 0 | 34 | 360 | 17 | 125 | 3.00E-43 | 143 |
| TcMYB16 | AtMYB81  | 47.3  | 148 | 78  | 2 | 25 | 468 | 17 | 162 | 6.00E-43 | 148 |
| TcMYB16 | ATMYB65  | 60    | 110 | 44  | 1 | 34 | 363 | 41 | 149 | 2.00E-42 | 149 |
| TcMYB16 | ATMYB23  | 59.62 | 104 | 42  | 0 | 37 | 348 | 13 | 116 | 2.00E-42 | 141 |
| TcMYB16 | ATMYB66  | 59.62 | 104 | 42  | 0 | 37 | 348 | 17 | 120 | 2.00E-42 | 140 |
| TcMYB16 | ATMYB0   | 58.65 | 104 | 43  | 0 | 37 | 348 | 15 | 118 | 4.00E-42 | 140 |
| TcMYB16 | ATMYB75  | 40.29 | 206 | 111 | 3 | 31 | 612 | 7  | 212 | 5.00E-42 | 141 |
| TcMYB16 | ATMYB2   | 38.58 | 197 | 89  | 3 | 34 | 528 | 20 | 216 | 9.00E-42 | 141 |
| TcMYB16 | ATMYB123 | 58.88 | 107 | 44  | 0 | 34 | 354 | 14 | 120 | 1.00E-41 | 140 |
| TcMYB16 | AtMYB82  | 41.71 | 175 | 87  | 4 | 34 | 513 | 12 | 186 | 1.00E-41 | 138 |
| TcMYB16 | AtMYB114 | 56.3  | 119 | 44  | 1 | 31 | 363 | 7  | 125 | 2.00E-41 | 135 |
| TcMYB16 | AtMYB97  | 59.05 | 105 | 43  | 0 | 28 | 342 | 17 | 121 | 4.00E-41 | 142 |

|         |           |       |     |     |    |     |     |     |     |          |      |
|---------|-----------|-------|-----|-----|----|-----|-----|-----|-----|----------|------|
| TcMYB16 | ATMYB48   | 60    | 105 | 42  | 0  | 31  | 345 | 6   | 110 | 4.00E-41 | 139  |
| TcMYB16 | ATMYB59-3 | 61.17 | 103 | 40  | 0  | 37  | 345 | 9   | 111 | 5.00E-41 | 138  |
| TcMYB16 | AtMYB45   | 57.84 | 102 | 43  | 0  | 37  | 342 | 19  | 120 | 5.00E-41 | 139  |
| TcMYB16 | ATMYB90   | 60.95 | 105 | 41  | 0  | 31  | 345 | 7   | 111 | 2.00E-40 | 137  |
| TcMYB16 | AtMYB27   | 57.69 | 104 | 44  | 0  | 34  | 345 | 9   | 112 | 1.00E-39 | 134  |
| TcMYB16 | AtMYB113  | 42.41 | 191 | 96  | 4  | 1   | 531 | 1   | 186 | 7.00E-39 | 132  |
| TcMYB16 | ATMYB78   | 48.06 | 129 | 53  | 1  | 22  | 366 | 22  | 150 | 8.00E-38 | 132  |
| TcMYB16 | AtMYB64   | 36.51 | 189 | 114 | 5  | 40  | 588 | 105 | 288 | 5.00E-30 | 112  |
| TcMYB16 | AtMYB104  | 44.54 | 119 | 66  | 2  | 40  | 396 | 18  | 134 | 1.00E-29 | 111  |
| TcMYB16 | ATMYB119  | 47.79 | 113 | 53  | 3  | 34  | 354 | 103 | 213 | 2.00E-28 | 108  |
| TcMYB16 | ATMYB119  | 23.13 | 134 | 92  | 4  | 190 | 558 | 102 | 230 | 2.00E-04 | 35   |
| TcMYB16 | AtMYB98   | 45.05 | 111 | 60  | 2  | 25  | 354 | 212 | 320 | 3.00E-27 | 104  |
| TcMYB16 | ATMYB25   | 48.54 | 103 | 52  | 2  | 40  | 345 | 50  | 150 | 1.00E-26 | 102  |
| TcMYB16 | ATMYB44   | 40.46 | 131 | 73  | 4  | 40  | 417 | 6   | 134 | 6.00E-26 | 99.4 |
| TcMYB16 | AtMYB115  | 41.51 | 106 | 62  | 2  | 40  | 357 | 158 | 261 | 9.00E-26 | 99.8 |
| TcMYB16 | ATMYB118  | 43.24 | 111 | 62  | 2  | 25  | 354 | 184 | 292 | 2.00E-25 | 99.8 |
| TcMYB16 | ATMYB118  | 25.33 | 75  | 51  | 2  | 151 | 360 | 169 | 243 | 3.00E-05 | 38.1 |
| TcMYB16 | AtMYB109  | 41.48 | 135 | 70  | 4  | 40  | 417 | 56  | 188 | 3.00E-25 | 99   |
| TcMYB16 | ATMYB73   | 44.66 | 103 | 56  | 2  | 40  | 345 | 13  | 113 | 9.00E-25 | 96.3 |
| TcMYB16 | AtMYB1    | 45.63 | 103 | 55  | 2  | 40  | 345 | 55  | 155 | 2.00E-24 | 96.3 |
| TcMYB16 | AtMYB1    | 31.88 | 69  | 46  | 1  | 184 | 387 | 50  | 118 | 7.00E-04 | 33.5 |
| TcMYB16 | ATMYB77   | 43.69 | 103 | 57  | 2  | 40  | 345 | 6   | 106 | 2.00E-24 | 94.7 |
| TcMYB16 | AtMYB70   | 44.66 | 103 | 56  | 2  | 40  | 345 | 13  | 113 | 9.00E-24 | 93.2 |
| TcMYB16 | AtMYB100  | 41.18 | 119 | 67  | 3  | 25  | 372 | 21  | 137 | 2.00E-23 | 90.9 |
| TcMYB16 | ATMYB52   | 42.72 | 103 | 58  | 2  | 40  | 345 | 5   | 105 | 1.00E-22 | 89   |
| TcMYB16 | ATMYB105  | 34.53 | 139 | 90  | 2  | 25  | 438 | 102 | 238 | 1.00E-22 | 90.1 |
| TcMYB16 | ATMYB54   | 41.51 | 106 | 61  | 2  | 40  | 354 | 6   | 109 | 2.00E-22 | 88.2 |
| TcMYB16 | AtMYB117  | 31.55 | 168 | 104 | 4  | 34  | 504 | 96  | 258 | 9.00E-22 | 88.2 |
| TcMYB16 | ATMYB110  | 36.79 | 106 | 66  | 2  | 40  | 354 | 67  | 170 | 7.00E-20 | 82   |
| TcMYB16 | AtMYB22   | 34.82 | 112 | 73  | 1  | 25  | 360 | 49  | 158 | 2.00E-19 | 80.1 |
| TcMYB16 | ATMYB91   | 38.61 | 101 | 60  | 1  | 49  | 345 | 7   | 107 | 4.00E-19 | 80.5 |
| TcMYB16 | ATMYB69   | 36.11 | 108 | 68  | 2  | 25  | 345 | 14  | 119 | 9.00E-19 | 77.8 |
| TcMYB16 | AtMYB56   | 26.67 | 180 | 132 | 3  | 40  | 579 | 93  | 250 | 2.00E-18 | 78.2 |
| TcMYB16 | AtMYB89   | 33.65 | 104 | 69  | 1  | 43  | 354 | 57  | 159 | 1.00E-16 | 70.5 |
| TcMYB16 | AtMYB124  | 27.54 | 334 | 213 | 13 | 49  | 963 | 28  | 340 | 2.00E-16 | 73.2 |
| TcMYB16 | ATMYB88   | 38.61 | 101 | 62  | 1  | 49  | 351 | 33  | 132 | 2.00E-15 | 70.1 |
| TcMYB17 | MYB8      | 58.39 | 137 | 56  | 1  | 16  | 423 | 4   | 140 | 5.00E-57 | 176  |
| TcMYB17 | ATMYB3    | 41.53 | 248 | 141 | 4  | 16  | 747 | 4   | 231 | 2.00E-56 | 176  |
| TcMYB17 | ATMYB4    | 59.71 | 139 | 53  | 1  | 16  | 423 | 4   | 142 | 3.00E-56 | 176  |
| TcMYB17 | AtMYB6    | 50.3  | 165 | 82  | 1  | 16  | 510 | 4   | 163 | 4.00E-56 | 174  |
| TcMYB17 | ATMYB121  | 61.24 | 129 | 48  | 1  | 43  | 423 | 28  | 156 | 5.00E-56 | 175  |
| TcMYB17 | ATMYB13   | 60.43 | 139 | 52  | 1  | 22  | 429 | 6   | 144 | 9.00E-55 | 171  |
| TcMYB17 | AtMYB32   | 64.96 | 117 | 41  | 0  | 16  | 366 | 4   | 120 | 1.00E-54 | 172  |
| TcMYB17 | AtMYB79   | 42.51 | 207 | 117 | 2  | 43  | 657 | 7   | 209 | 1.00E-54 | 171  |
| TcMYB17 | MYB7      | 64.1  | 117 | 42  | 0  | 16  | 366 | 4   | 120 | 2.00E-54 | 171  |
| TcMYB17 | ATMYB5    | 40.35 | 228 | 131 | 4  | 1   | 669 | 10  | 232 | 4.00E-54 | 169  |
| TcMYB17 | AtMYB41   | 64.96 | 117 | 41  | 0  | 16  | 366 | 4   | 120 | 1.00E-53 | 169  |
| TcMYB17 | AtMYB107  | 65.81 | 117 | 40  | 0  | 16  | 366 | 4   | 120 | 1.00E-53 | 170  |
| TcMYB17 | ATMYB71   | 46.55 | 174 | 92  | 2  | 43  | 561 | 19  | 190 | 2.00E-53 | 168  |
| TcMYB17 | ATMYB102  | 66.67 | 117 | 39  | 0  | 16  | 366 | 4   | 120 | 3.00E-53 | 170  |
| TcMYB17 | AtMYB108  | 42.6  | 223 | 127 | 5  | 40  | 705 | 19  | 235 | 3.00E-53 | 169  |
| TcMYB17 | ATMYB3    | 58.33 | 120 | 50  | 0  | 4   | 363 | 8   | 127 | 3.00E-53 | 166  |
| TcMYB17 | AtMYB24   | 59.32 | 118 | 48  | 0  | 37  | 390 | 16  | 133 | 8.00E-53 | 165  |
| TcMYB17 | AtMYB74   | 66.09 | 115 | 39  | 0  | 22  | 366 | 7   | 121 | 2.00E-52 | 167  |
| TcMYB17 | AtMYB9    | 64.96 | 117 | 41  | 0  | 16  | 366 | 4   | 120 | 2.00E-52 | 167  |
| TcMYB17 | ATMYB66   | 53.79 | 145 | 61  | 3  | 1   | 417 | 1   | 141 | 7.00E-52 | 162  |
| TcMYB17 | AtMYB112  | 46.24 | 173 | 92  | 3  | 37  | 552 | 31  | 195 | 8.00E-52 | 163  |
| TcMYB17 | ATMYB48   | 46.2  | 171 | 92  | 2  | 43  | 555 | 8   | 153 | 8.00E-52 | 164  |
| TcMYB17 | ATMYB58   | 57.5  | 120 | 51  | 0  | 22  | 381 | 8   | 127 | 2.00E-51 | 163  |
| TcMYB17 | ATMYB63   | 56.49 | 131 | 56  | 1  | 22  | 411 | 8   | 138 | 2.00E-51 | 164  |
| TcMYB17 | ATMYB59-3 | 62.86 | 105 | 39  | 0  | 43  | 357 | 9   | 113 | 2.00E-51 | 162  |
| TcMYB17 | ATMYB106  | 64.96 | 117 | 41  | 0  | 16  | 366 | 47  | 163 | 3.00E-51 | 166  |
| TcMYB17 | ATMYB14   | 59.06 | 127 | 49  | 1  | 22  | 393 | 6   | 132 | 4.00E-51 | 162  |
| TcMYB17 | ATMYB12   | 57.86 | 140 | 53  | 2  | 22  | 423 | 6   | 145 | 4.00E-51 | 165  |
| TcMYB17 | AtMYB49   | 62.39 | 117 | 44  | 0  | 16  | 366 | 4   | 120 | 9.00E-51 | 163  |
| TcMYB17 | AtMYB51   | 44.44 | 207 | 114 | 5  | 22  | 639 | 7   | 197 | 2.00E-50 | 163  |
| TcMYB17 | ATMYB57   | 57.63 | 118 | 50  | 0  | 16  | 369 | 17  | 134 | 2.00E-50 | 158  |
| TcMYB17 | ATMYB23   | 53.57 | 140 | 65  | 2  | 10  | 429 | 2   | 138 | 3.00E-50 | 158  |
| TcMYB17 | ATMYB111  | 64.86 | 111 | 39  | 0  | 22  | 354 | 6   | 116 | 6.00E-50 | 161  |
| TcMYB17 | ATMYB2    | 51.43 | 140 | 67  | 1  | 1   | 417 | 7   | 146 | 8.00E-50 | 159  |
| TcMYB17 | ATMYB16   | 63.25 | 117 | 43  | 0  | 16  | 366 | 4   | 120 | 8.00E-50 | 160  |
| TcMYB17 | AtMYB10   | 52.52 | 139 | 64  | 1  | 1   | 411 | 1   | 139 | 9.00E-50 | 158  |
| TcMYB17 | ATMYB30   | 43.08 | 195 | 90  | 1  | 22  | 543 | 6   | 200 | 1.00E-49 | 160  |
| TcMYB17 | AtMYB62   | 58.33 | 120 | 49  | 1  | 25  | 381 | 14  | 133 | 1.00E-49 | 159  |
| TcMYB17 | ATMYB11   | 66.67 | 111 | 37  | 0  | 22  | 354 | 6   | 116 | 1.00E-49 | 160  |
| TcMYB17 | ATMYB86   | 63.48 | 115 | 42  | 0  | 22  | 366 | 6   | 120 | 1.00E-49 | 160  |
| TcMYB17 | ATMYB29   | 42.73 | 227 | 108 | 7  | 22  | 636 | 7   | 223 | 3.00E-49 | 159  |
| TcMYB17 | ATMYB67   | 54.62 | 130 | 51  | 1  | 1   | 366 | 1   | 130 | 4.00E-49 | 158  |
| TcMYB17 | AtMYB53   | 60.68 | 117 | 46  | 0  | 16  | 366 | 4   | 120 | 4.00E-49 | 158  |
| TcMYB17 | ATMYB123  | 60.17 | 118 | 47  | 0  | 1   | 354 | 1   | 118 | 4.00E-49 | 157  |

|         |          |       |     |     |   |     |     |     |     |          |      |
|---------|----------|-------|-----|-----|---|-----|-----|-----|-----|----------|------|
| TcMYB17 | AtMYB17  | 62.61 | 115 | 43  | 0 | 22  | 366 | 6   | 120 | 4.00E-49 | 158  |
| TcMYB17 | AtMYB116 | 58.47 | 118 | 48  | 1 | 28  | 378 | 14  | 131 | 6.00E-49 | 157  |
| TcMYB17 | AtMYB85  | 59.13 | 115 | 47  | 0 | 22  | 366 | 6   | 120 | 7.00E-49 | 156  |
| TcMYB17 | AtMYB93  | 62.39 | 117 | 44  | 0 | 16  | 366 | 4   | 120 | 8.00E-49 | 159  |
| TcMYB17 | ATMYB15  | 63.72 | 113 | 41  | 0 | 22  | 360 | 6   | 118 | 1.00E-48 | 156  |
| TcMYB17 | AtMYB50  | 60.87 | 115 | 45  | 0 | 22  | 366 | 6   | 120 | 1.00E-48 | 157  |
| TcMYB17 | ATMYB96  | 58.54 | 123 | 48  | 1 | 22  | 381 | 6   | 128 | 2.00E-48 | 158  |
| TcMYB17 | ATMYB61  | 56.59 | 129 | 53  | 1 | 22  | 399 | 6   | 134 | 2.00E-48 | 158  |
| TcMYB17 | AtMYB20  | 59.13 | 115 | 47  | 0 | 22  | 366 | 6   | 120 | 3.00E-48 | 155  |
| TcMYB17 | ATMYB31  | 58.54 | 123 | 51  | 0 | 22  | 390 | 6   | 128 | 4.00E-48 | 156  |
| TcMYB17 | ATMYB92  | 58.97 | 117 | 48  | 0 | 16  | 366 | 4   | 120 | 6.00E-48 | 156  |
| TcMYB17 | ATMYB94  | 59.48 | 116 | 47  | 0 | 22  | 369 | 6   | 121 | 8.00E-48 | 155  |
| TcMYB17 | AtMYB60  | 56.15 | 130 | 57  | 0 | 22  | 411 | 6   | 135 | 8.00E-48 | 154  |
| TcMYB17 | ATMYB78  | 48.34 | 151 | 63  | 2 | 10  | 417 | 16  | 166 | 8.00E-48 | 155  |
| TcMYB17 | ATMYB72  | 56.3  | 119 | 52  | 0 | 22  | 378 | 8   | 126 | 9.00E-48 | 154  |
| TcMYB17 | AtMYB42  | 61.26 | 111 | 43  | 0 | 22  | 354 | 6   | 116 | 9.00E-48 | 154  |
| TcMYB17 | AtMYB83  | 43.24 | 185 | 103 | 1 | 31  | 579 | 27  | 211 | 1.00E-47 | 155  |
| TcMYB17 | AtMYB43  | 50.7  | 142 | 61  | 1 | 22  | 420 | 6   | 147 | 2.00E-47 | 154  |
| TcMYB17 | ATMYB28  | 60    | 115 | 46  | 1 | 22  | 366 | 7   | 120 | 3.00E-47 | 155  |
| TcMYB17 | ATMYB34  | 49.66 | 145 | 73  | 2 | 22  | 456 | 7   | 145 | 3.00E-47 | 153  |
| TcMYB17 | ATMYB0   | 57.14 | 119 | 51  | 1 | 28  | 384 | 10  | 126 | 4.00E-47 | 150  |
| TcMYB17 | AtMYB76  | 58.33 | 120 | 50  | 1 | 7   | 366 | 2   | 120 | 5.00E-47 | 154  |
| TcMYB17 | ATMYB80  | 58.26 | 115 | 48  | 0 | 22  | 366 | 6   | 120 | 2.00E-46 | 152  |
| TcMYB17 | ATMYB46  | 58.77 | 114 | 47  | 0 | 37  | 378 | 17  | 130 | 2.00E-46 | 150  |
| TcMYB17 | AtMYB103 | 59.82 | 112 | 45  | 0 | 22  | 357 | 6   | 117 | 2.00E-46 | 153  |
| TcMYB17 | AtMYB82  | 52.52 | 139 | 64  | 2 | 28  | 438 | 6   | 143 | 2.00E-46 | 148  |
| TcMYB17 | ATMYB95  | 41.1  | 219 | 129 | 4 | 40  | 696 | 12  | 194 | 3.00E-46 | 150  |
| TcMYB17 | ATMYB122 | 59.13 | 115 | 47  | 0 | 22  | 366 | 6   | 120 | 5.00E-46 | 151  |
| TcMYB17 | ATMYB99  | 55.74 | 122 | 47  | 1 | 22  | 366 | 7   | 128 | 5.00E-46 | 148  |
| TcMYB17 | ATMYB35  | 42.25 | 187 | 100 | 3 | 22  | 558 | 6   | 192 | 6.00E-46 | 150  |
| TcMYB17 | AtMYB27  | 60.36 | 111 | 42  | 1 | 40  | 366 | 9   | 119 | 6.00E-46 | 148  |
| TcMYB17 | ATMYB101 | 42.44 | 172 | 98  | 3 | 40  | 552 | 18  | 187 | 1.00E-45 | 153  |
| TcMYB17 | ATMYB55  | 41.71 | 199 | 104 | 3 | 22  | 582 | 6   | 192 | 1.00E-44 | 147  |
| TcMYB17 | AtMYB40  | 57.39 | 115 | 49  | 0 | 22  | 366 | 6   | 120 | 2.00E-44 | 145  |
| TcMYB17 | ATMYB26  | 46.98 | 149 | 67  | 2 | 22  | 432 | 6   | 154 | 3.00E-44 | 147  |
| TcMYB17 | ATMYB37  | 54.17 | 120 | 54  | 1 | 22  | 378 | 6   | 125 | 3.00E-44 | 146  |
| TcMYB17 | AtMYB47  | 35.63 | 247 | 157 | 4 | 40  | 774 | 12  | 230 | 4.00E-44 | 144  |
| TcMYB17 | AtMYB36  | 57.14 | 112 | 47  | 1 | 22  | 354 | 6   | 117 | 5.00E-44 | 145  |
| TcMYB17 | AtMYB97  | 47.68 | 151 | 69  | 3 | 40  | 462 | 19  | 168 | 9.00E-44 | 146  |
| TcMYB17 | ATMYB68  | 49.26 | 136 | 68  | 1 | 22  | 426 | 6   | 141 | 9.00E-44 | 146  |
| TcMYB17 | ATMYB87  | 34.31 | 239 | 117 | 4 | 22  | 618 | 6   | 244 | 2.00E-43 | 143  |
| TcMYB17 | AtMYB19  | 53.49 | 129 | 59  | 1 | 31  | 414 | 9   | 137 | 2.00E-43 | 142  |
| TcMYB17 | ATMYB84  | 57.02 | 114 | 48  | 1 | 22  | 360 | 6   | 119 | 2.00E-43 | 143  |
| TcMYB17 | AtMYB18  | 55.81 | 129 | 57  | 1 | 43  | 429 | 11  | 133 | 2.00E-43 | 142  |
| TcMYB17 | ATMYB120 | 57.55 | 106 | 45  | 0 | 40  | 357 | 26  | 131 | 4.00E-42 | 144  |
| TcMYB17 | ATMYB65  | 52.21 | 113 | 51  | 1 | 22  | 351 | 32  | 144 | 5.00E-42 | 144  |
| TcMYB17 | ATMYB38  | 55.36 | 112 | 49  | 1 | 22  | 354 | 6   | 117 | 2.00E-41 | 138  |
| TcMYB17 | AtMYB114 | 55.77 | 104 | 46  | 0 | 40  | 351 | 8   | 111 | 5.00E-41 | 132  |
| TcMYB17 | AtMYB45  | 57.55 | 106 | 45  | 0 | 31  | 348 | 15  | 120 | 6.00E-41 | 135  |
| TcMYB17 | AtMYB113 | 41.67 | 156 | 91  | 2 | 40  | 507 | 8   | 157 | 9.00E-41 | 135  |
| TcMYB17 | AtMYB81  | 54.46 | 112 | 51  | 1 | 31  | 366 | 17  | 127 | 1.00E-40 | 139  |
| TcMYB17 | ATMYB90  | 49.61 | 127 | 64  | 1 | 40  | 420 | 8   | 130 | 3.00E-40 | 134  |
| TcMYB17 | ATMYB75  | 55.77 | 104 | 46  | 0 | 40  | 351 | 8   | 111 | 4.00E-40 | 133  |
| TcMYB17 | ATMYB33  | 51.3  | 115 | 56  | 1 | 7   | 351 | 25  | 135 | 4.00E-40 | 139  |
| TcMYB17 | ATMYB119 | 44.62 | 130 | 64  | 3 | 40  | 405 | 103 | 230 | 6.00E-31 | 112  |
| TcMYB17 | AtMYB64  | 32    | 225 | 135 | 5 | 46  | 666 | 105 | 324 | 2.00E-30 | 111  |
| TcMYB17 | AtMYB70  | 47.66 | 107 | 56  | 1 | 46  | 366 | 13  | 118 | 1.00E-29 | 107  |
| TcMYB17 | AtMYB104 | 43.86 | 114 | 64  | 1 | 25  | 366 | 11  | 123 | 9.00E-29 | 106  |
| TcMYB17 | ATMYB73  | 45.79 | 107 | 58  | 1 | 46  | 366 | 13  | 118 | 1.00E-28 | 104  |
| TcMYB17 | ATMYB44  | 42.61 | 115 | 66  | 1 | 46  | 390 | 6   | 119 | 5.00E-28 | 102  |
| TcMYB17 | AtMYB98  | 42.24 | 116 | 67  | 2 | 4   | 351 | 204 | 317 | 7.00E-28 | 104  |
| TcMYB17 | AtMYB98  | 35.48 | 62  | 39  | 1 | 175 | 357 | 207 | 268 | 2.00E-08 | 47.4 |
| TcMYB17 | AtMYB109 | 47.27 | 110 | 55  | 2 | 46  | 366 | 56  | 164 | 7.00E-28 | 103  |
| TcMYB17 | AtMYB115 | 40.68 | 118 | 70  | 2 | 28  | 381 | 152 | 267 | 3.00E-27 | 101  |
| TcMYB17 | ATMYB77  | 35.33 | 167 | 107 | 4 | 46  | 543 | 6   | 168 | 5.00E-27 | 100  |
| TcMYB17 | ATMYB118 | 44.95 | 109 | 59  | 2 | 28  | 351 | 183 | 289 | 5.00E-27 | 102  |
| TcMYB17 | ATMYB118 | 26.39 | 72  | 51  | 2 | 190 | 399 | 184 | 255 | 4.00E-06 | 40   |
| TcMYB17 | ATMYB25  | 46.73 | 107 | 56  | 2 | 34  | 351 | 45  | 150 | 1.00E-26 | 100  |
| TcMYB17 | AtMYB1   | 45.1  | 102 | 56  | 1 | 46  | 351 | 55  | 155 | 4.00E-26 | 99   |
| TcMYB17 | AtMYB1   | 32.86 | 70  | 45  | 2 | 205 | 408 | 55  | 124 | 1.00E-04 | 35   |
| TcMYB17 | ATMYB105 | 37.59 | 133 | 82  | 3 | 25  | 420 | 100 | 226 | 7.00E-25 | 94.7 |
| TcMYB17 | AtMYB117 | 41.74 | 115 | 65  | 3 | 13  | 351 | 86  | 198 | 1.00E-24 | 94.7 |
| TcMYB17 | AtMYB100 | 39.13 | 115 | 70  | 2 | 16  | 360 | 16  | 128 | 1.00E-24 | 92   |
| TcMYB17 | ATMYB54  | 35.1  | 151 | 97  | 3 | 46  | 495 | 6   | 148 | 3.00E-24 | 91.3 |
| TcMYB17 | ATMYB91  | 37.39 | 115 | 70  | 1 | 55  | 393 | 7   | 121 | 5.00E-24 | 92.8 |
| TcMYB17 | AtMYB56  | 31.25 | 160 | 110 | 2 | 46  | 525 | 93  | 244 | 4.00E-23 | 89.7 |
| TcMYB17 | ATMYB52  | 46.88 | 96  | 50  | 2 | 46  | 330 | 5   | 98  | 5.00E-23 | 88.2 |
| TcMYB17 | ATMYB110 | 37.5  | 104 | 65  | 1 | 46  | 357 | 67  | 169 | 2.00E-22 | 87.8 |
| TcMYB17 | ATMYB69  | 33.58 | 134 | 89  | 1 | 28  | 429 | 13  | 145 | 3.00E-21 | 83.2 |
| TcMYB17 | AtMYB22  | 36.52 | 115 | 73  | 3 | 16  | 360 | 44  | 155 | 1.00E-20 | 82   |

|         |           |       |     |     |    |    |      |    |     |          |      |
|---------|-----------|-------|-----|-----|----|----|------|----|-----|----------|------|
| TcMYB17 | AtMYB89   | 35.29 | 119 | 75  | 2  | 28 | 378  | 50 | 167 | 1.00E-20 | 80.5 |
| TcMYB17 | AtMYB124  | 25.82 | 213 | 155 | 4  | 55 | 684  | 28 | 224 | 3.00E-19 | 79.7 |
| TcMYB17 | ATMYB88   | 34.31 | 102 | 67  | 1  | 55 | 360  | 33 | 133 | 3.00E-16 | 70.9 |
| TcMYB18 | ATMYB33   | 36.6  | 530 | 311 | 17 | 19 | 1533 | 29 | 514 | 9.00E-80 | 251  |
| TcMYB18 | ATMYB65   | 35.41 | 545 | 311 | 17 | 10 | 1521 | 35 | 547 | 5.00E-79 | 250  |
| TcMYB18 | ATMYB101  | 34.26 | 540 | 320 | 19 | 19 | 1533 | 15 | 490 | 1.00E-69 | 224  |
| TcMYB18 | AtMYB81   | 39.19 | 370 | 205 | 13 | 25 | 1074 | 19 | 364 | 1.00E-65 | 212  |
| TcMYB18 | AtMYB97   | 69.34 | 137 | 41  | 1  | 7  | 414  | 12 | 148 | 6.00E-64 | 206  |
| TcMYB18 | ATMYB120  | 37.77 | 376 | 224 | 8  | 16 | 1113 | 22 | 377 | 4.00E-62 | 205  |
| TcMYB18 | ATMYB92   | 65.38 | 104 | 36  | 0  | 28 | 339  | 12 | 115 | 3.00E-46 | 157  |
| TcMYB18 | ATMYB102  | 64.42 | 104 | 37  | 0  | 28 | 339  | 12 | 115 | 3.00E-46 | 158  |
| TcMYB18 | AtMYB74   | 63.46 | 104 | 38  | 0  | 28 | 339  | 13 | 116 | 4.00E-46 | 157  |
| TcMYB18 | AtMYB9    | 62.5  | 104 | 39  | 0  | 28 | 339  | 12 | 115 | 1.00E-45 | 155  |
| TcMYB18 | AtMYB49   | 36.7  | 267 | 156 | 8  | 28 | 789  | 12 | 250 | 2.00E-45 | 155  |
| TcMYB18 | ATMYB71   | 56.3  | 119 | 47  | 1  | 7  | 348  | 6  | 124 | 2.00E-45 | 153  |
| TcMYB18 | ATMYB3    | 45.24 | 168 | 92  | 2  | 28 | 531  | 12 | 153 | 2.00E-45 | 153  |
| TcMYB18 | AtMYB51   | 41.32 | 242 | 126 | 8  | 28 | 705  | 13 | 252 | 4.00E-45 | 155  |
| TcMYB18 | AtMYB17   | 63.46 | 104 | 38  | 0  | 28 | 339  | 12 | 115 | 4.00E-45 | 153  |
| TcMYB18 | AtMYB41   | 60.58 | 104 | 41  | 0  | 28 | 339  | 12 | 115 | 5.00E-45 | 152  |
| TcMYB18 | AtMYB53   | 62.5  | 104 | 39  | 0  | 28 | 339  | 12 | 115 | 8.00E-45 | 153  |
| TcMYB18 | AtMYB107  | 60.58 | 104 | 41  | 0  | 28 | 339  | 12 | 115 | 1.00E-44 | 153  |
| TcMYB18 | ATMYB34   | 40.79 | 228 | 125 | 9  | 28 | 681  | 12 | 214 | 1.00E-44 | 152  |
| TcMYB18 | ATMYB14   | 58.65 | 104 | 43  | 0  | 28 | 339  | 12 | 115 | 2.00E-44 | 150  |
| TcMYB18 | AtMYB79   | 60    | 105 | 42  | 0  | 31 | 345  | 7  | 111 | 2.00E-44 | 150  |
| TcMYB18 | ATMYB13   | 60.58 | 104 | 41  | 0  | 28 | 339  | 12 | 115 | 3.00E-44 | 149  |
| TcMYB18 | AtMYB24   | 55.36 | 112 | 46  | 1  | 13 | 336  | 8  | 119 | 4.00E-44 | 148  |
| TcMYB18 | AtMYB93   | 62.5  | 104 | 39  | 0  | 28 | 339  | 12 | 115 | 5.00E-44 | 152  |
| TcMYB18 | ATMYB15   | 47.77 | 157 | 82  | 2  | 28 | 498  | 12 | 158 | 1.00E-43 | 149  |
| TcMYB18 | ATMYB3    | 54.87 | 113 | 46  | 1  | 13 | 336  | 10 | 122 | 1.00E-43 | 147  |
| TcMYB18 | AtMYB6    | 61.76 | 102 | 39  | 0  | 34 | 339  | 14 | 115 | 2.00E-43 | 147  |
| TcMYB18 | MYB8      | 59.62 | 104 | 42  | 0  | 28 | 339  | 12 | 115 | 3.00E-43 | 145  |
| TcMYB18 | ATMYB57   | 54.63 | 108 | 49  | 0  | 22 | 345  | 23 | 130 | 3.00E-43 | 145  |
| TcMYB18 | ATMYB66   | 54.05 | 111 | 51  | 0  | 7  | 339  | 9  | 119 | 4.00E-43 | 145  |
| TcMYB18 | ATMYB122  | 38.25 | 251 | 142 | 8  | 28 | 741  | 12 | 249 | 9.00E-43 | 148  |
| TcMYB18 | ATMYB95   | 45.18 | 166 | 85  | 3  | 28 | 507  | 12 | 172 | 1.00E-42 | 145  |
| TcMYB18 | ATMYB121  | 44.65 | 159 | 88  | 1  | 31 | 507  | 28 | 183 | 2.00E-42 | 145  |
| TcMYB18 | MYB7      | 59.62 | 104 | 42  | 0  | 28 | 339  | 12 | 115 | 2.00E-42 | 145  |
| TcMYB18 | ATMYB28   | 36.78 | 242 | 143 | 5  | 19 | 714  | 9  | 224 | 2.00E-42 | 148  |
| TcMYB18 | ATMYB16   | 59.62 | 104 | 42  | 0  | 28 | 339  | 12 | 115 | 2.00E-42 | 147  |
| TcMYB18 | ATMYB106  | 59.62 | 104 | 42  | 0  | 28 | 339  | 55 | 158 | 2.00E-42 | 148  |
| TcMYB18 | AtMYB116  | 53.1  | 113 | 53  | 0  | 7  | 345  | 11 | 123 | 3.00E-42 | 145  |
| TcMYB18 | ATMYB94   | 58.65 | 104 | 43  | 0  | 28 | 339  | 12 | 115 | 5.00E-42 | 146  |
| TcMYB18 | AtMYB60   | 58.65 | 104 | 43  | 0  | 28 | 339  | 12 | 115 | 7.00E-42 | 144  |
| TcMYB18 | AtMYB43   | 37.5  | 232 | 126 | 7  | 28 | 666  | 12 | 236 | 8.00E-42 | 145  |
| TcMYB18 | ATMYB5    | 56.73 | 104 | 45  | 0  | 28 | 339  | 23 | 126 | 8.00E-42 | 143  |
| TcMYB18 | ATMYB86   | 57.55 | 106 | 45  | 0  | 28 | 345  | 12 | 117 | 1.00E-41 | 145  |
| TcMYB18 | AtMYB85   | 47.33 | 150 | 78  | 4  | 28 | 474  | 12 | 145 | 1.00E-41 | 143  |
| TcMYB18 | ATMYB23   | 41.21 | 165 | 97  | 2  | 1  | 495  | 3  | 163 | 1.00E-41 | 141  |
| TcMYB18 | ATMYB29   | 58.49 | 106 | 44  | 0  | 19 | 336  | 9  | 114 | 1.00E-41 | 145  |
| TcMYB18 | ATMYB4    | 60.78 | 102 | 40  | 0  | 34 | 339  | 14 | 115 | 1.00E-41 | 143  |
| TcMYB18 | ATMYB96   | 57.69 | 104 | 44  | 0  | 28 | 339  | 12 | 115 | 1.00E-41 | 145  |
| TcMYB18 | AtMYB50   | 58.65 | 104 | 43  | 0  | 28 | 339  | 12 | 115 | 2.00E-41 | 144  |
| TcMYB18 | AtMYB32   | 59.8  | 102 | 41  | 0  | 34 | 339  | 14 | 115 | 2.00E-41 | 143  |
| TcMYB18 | ATMYB63   | 58.65 | 104 | 43  | 0  | 28 | 339  | 14 | 117 | 2.00E-41 | 143  |
| TcMYB18 | AtMYB36   | 59.43 | 106 | 42  | 1  | 25 | 339  | 11 | 116 | 2.00E-41 | 144  |
| TcMYB18 | ATMYB30   | 57.55 | 106 | 45  | 0  | 22 | 339  | 10 | 115 | 3.00E-41 | 144  |
| TcMYB18 | AtMYB76   | 57.01 | 107 | 46  | 0  | 19 | 339  | 9  | 115 | 3.00E-41 | 144  |
| TcMYB18 | ATMYB59-3 | 54.87 | 113 | 50  | 1  | 31 | 366  | 9  | 121 | 4.00E-41 | 140  |
| TcMYB18 | AtMYB42   | 56.73 | 104 | 45  | 0  | 28 | 339  | 12 | 115 | 4.00E-41 | 142  |
| TcMYB18 | ATMYB87   | 58.49 | 106 | 43  | 1  | 25 | 339  | 11 | 116 | 5.00E-41 | 142  |
| TcMYB18 | ATMYB72   | 57.69 | 104 | 44  | 0  | 28 | 339  | 14 | 117 | 5.00E-41 | 142  |
| TcMYB18 | ATMYB61   | 57.69 | 104 | 44  | 0  | 28 | 339  | 12 | 115 | 7.00E-41 | 144  |
| TcMYB18 | ATMYB48   | 54.87 | 113 | 50  | 1  | 31 | 366  | 8  | 120 | 7.00E-41 | 140  |
| TcMYB18 | AtMYB20   | 54.72 | 106 | 48  | 0  | 28 | 345  | 12 | 117 | 1.00E-40 | 141  |
| TcMYB18 | ATMYB58   | 55.77 | 104 | 46  | 0  | 28 | 339  | 14 | 117 | 2.00E-40 | 140  |
| TcMYB18 | AtMYB104  | 31.68 | 404 | 260 | 17 | 34 | 1197 | 18 | 367 | 2.00E-40 | 143  |
| TcMYB18 | ATMYB11   | 56.73 | 104 | 45  | 0  | 28 | 339  | 12 | 115 | 2.00E-40 | 142  |
| TcMYB18 | AtMYB82   | 48.76 | 121 | 62  | 0  | 16 | 378  | 8  | 128 | 2.00E-40 | 137  |
| TcMYB18 | ATMYB99   | 54.05 | 111 | 44  | 1  | 28 | 339  | 13 | 123 | 3.00E-40 | 139  |
| TcMYB18 | ATMYB12   | 55.77 | 104 | 46  | 0  | 28 | 339  | 12 | 115 | 3.00E-40 | 142  |
| TcMYB18 | AtMYB62   | 53.77 | 106 | 49  | 0  | 28 | 345  | 19 | 124 | 3.00E-40 | 140  |
| TcMYB18 | ATMYB31   | 56.73 | 104 | 45  | 0  | 28 | 339  | 12 | 115 | 4.00E-40 | 140  |
| TcMYB18 | ATMYB46   | 55.77 | 104 | 46  | 0  | 28 | 339  | 18 | 121 | 5.00E-40 | 139  |
| TcMYB18 | ATMYB0    | 55.34 | 103 | 46  | 0  | 31 | 339  | 15 | 117 | 6.00E-40 | 137  |
| TcMYB18 | AtMYB47   | 42.44 | 172 | 86  | 4  | 28 | 504  | 12 | 183 | 7.00E-40 | 138  |
| TcMYB18 | AtMYB112  | 52.83 | 106 | 50  | 0  | 28 | 345  | 32 | 137 | 7.00E-40 | 137  |
| TcMYB18 | ATMYB123  | 54.81 | 104 | 47  | 0  | 28 | 339  | 14 | 117 | 7.00E-40 | 138  |
| TcMYB18 | ATMYB80   | 55.24 | 105 | 47  | 0  | 25 | 339  | 11 | 115 | 9.00E-40 | 139  |
| TcMYB18 | ATMYB68   | 59.43 | 106 | 42  | 1  | 25 | 339  | 11 | 116 | 1.00E-39 | 140  |
| TcMYB18 | ATMYB35   | 54.29 | 105 | 48  | 0  | 25 | 339  | 11 | 115 | 2.00E-39 | 138  |

|         |           |       |     |     |    |    |      |     |     |          |      |
|---------|-----------|-------|-----|-----|----|----|------|-----|-----|----------|------|
| TcMYB18 | ATMYB84   | 58.49 | 106 | 43  | 1  | 25 | 339  | 11  | 116 | 3.00E-39 | 138  |
| TcMYB18 | AtMYB83   | 33.46 | 269 | 130 | 6  | 7  | 666  | 23  | 290 | 3.00E-39 | 139  |
| TcMYB18 | AtMYB108  | 53.77 | 106 | 49  | 0  | 28 | 345  | 19  | 124 | 5.00E-39 | 137  |
| TcMYB18 | AtMYB103  | 42.07 | 164 | 86  | 3  | 28 | 492  | 12  | 163 | 5.00E-39 | 139  |
| TcMYB18 | ATMYB38   | 43.29 | 164 | 89  | 3  | 25 | 504  | 11  | 152 | 5.00E-39 | 137  |
| TcMYB18 | ATMYB2    | 52.83 | 106 | 50  | 0  | 28 | 345  | 20  | 125 | 5.00E-39 | 136  |
| TcMYB18 | AtMYB10   | 55.77 | 104 | 46  | 0  | 28 | 339  | 14  | 117 | 8.00E-39 | 134  |
| TcMYB18 | ATMYB111  | 55.77 | 104 | 46  | 0  | 28 | 339  | 12  | 115 | 2.00E-38 | 136  |
| TcMYB18 | ATMYB37   | 56.19 | 105 | 45  | 1  | 28 | 339  | 12  | 116 | 2.00E-38 | 136  |
| TcMYB18 | ATMYB55   | 53.39 | 118 | 43  | 1  | 28 | 345  | 12  | 129 | 2.00E-38 | 136  |
| TcMYB18 | ATMYB67   | 50.93 | 108 | 53  | 0  | 16 | 339  | 18  | 125 | 3.00E-38 | 135  |
| TcMYB18 | AtMYB40   | 47.33 | 131 | 68  | 1  | 28 | 417  | 12  | 142 | 1.00E-37 | 132  |
| TcMYB18 | ATMYB26   | 39.66 | 174 | 96  | 4  | 28 | 522  | 12  | 176 | 1.00E-37 | 135  |
| TcMYB18 | AtMYB27   | 53.7  | 108 | 50  | 0  | 25 | 348  | 8   | 115 | 3.00E-37 | 130  |
| TcMYB18 | AtMYB114  | 47.27 | 110 | 58  | 0  | 10 | 339  | 2   | 111 | 7.00E-37 | 126  |
| TcMYB18 | ATMYB75   | 47.27 | 110 | 58  | 0  | 10 | 339  | 2   | 111 | 1.00E-35 | 126  |
| TcMYB18 | AtMYB45   | 54.9  | 102 | 46  | 0  | 31 | 336  | 19  | 120 | 2.00E-35 | 126  |
| TcMYB18 | AtMYB19   | 34.56 | 217 | 131 | 4  | 31 | 648  | 13  | 210 | 3.00E-35 | 125  |
| TcMYB18 | ATMYB78   | 45.83 | 120 | 51  | 1  | 28 | 345  | 26  | 145 | 1.00E-34 | 125  |
| TcMYB18 | ATMYB90   | 45.13 | 113 | 62  | 0  | 10 | 348  | 2   | 114 | 2.00E-34 | 122  |
| TcMYB18 | AtMYB113  | 48.08 | 104 | 54  | 0  | 28 | 339  | 8   | 111 | 3.00E-34 | 122  |
| TcMYB18 | AtMYB18   | 50.49 | 103 | 51  | 0  | 31 | 339  | 11  | 113 | 3.00E-32 | 117  |
| TcMYB18 | AtMYB109  | 53.51 | 114 | 50  | 3  | 7  | 339  | 45  | 156 | 9.00E-31 | 116  |
| TcMYB18 | AtMYB98   | 44.72 | 123 | 66  | 2  | 25 | 387  | 214 | 335 | 3.00E-30 | 115  |
| TcMYB18 | ATMYB119  | 49.12 | 114 | 57  | 3  | 10 | 348  | 97  | 207 | 3.00E-30 | 115  |
| TcMYB18 | ATMYB73   | 51.96 | 102 | 49  | 1  | 34 | 339  | 13  | 113 | 6.00E-30 | 112  |
| TcMYB18 | AtMYB70   | 50.94 | 106 | 52  | 1  | 34 | 351  | 13  | 117 | 6.00E-30 | 112  |
| TcMYB18 | AtMYB1    | 50.88 | 114 | 54  | 2  | 4  | 339  | 43  | 155 | 2.00E-29 | 112  |
| TcMYB18 | ATMYB77   | 49.53 | 107 | 54  | 1  | 34 | 354  | 6   | 111 | 3.00E-29 | 110  |
| TcMYB18 | ATMYB25   | 50.91 | 110 | 53  | 2  | 13 | 339  | 43  | 150 | 3.00E-29 | 111  |
| TcMYB18 | AtMYB64   | 50    | 106 | 52  | 3  | 34 | 348  | 105 | 207 | 5.00E-29 | 111  |
| TcMYB18 | ATMYB118  | 47.22 | 108 | 57  | 2  | 25 | 348  | 186 | 291 | 5.00E-28 | 108  |
| TcMYB18 | AtMYB115  | 47.06 | 102 | 53  | 2  | 34 | 336  | 158 | 257 | 1.00E-27 | 106  |
| TcMYB18 | ATMYB44   | 50    | 102 | 51  | 1  | 34 | 339  | 6   | 106 | 2.00E-27 | 105  |
| TcMYB18 | AtMYB117  | 36.36 | 154 | 97  | 3  | 28 | 486  | 96  | 243 | 5.00E-27 | 104  |
| TcMYB18 | AtMYB100  | 46.23 | 106 | 56  | 2  | 28 | 342  | 24  | 127 | 9.00E-27 | 101  |
| TcMYB18 | AtMYB56   | 42.54 | 134 | 73  | 3  | 1  | 390  | 80  | 212 | 1.00E-26 | 103  |
| TcMYB18 | ATMYB105  | 42.98 | 114 | 64  | 2  | 7  | 345  | 98  | 209 | 3.00E-26 | 102  |
| TcMYB18 | ATMYB54   | 45.71 | 105 | 56  | 2  | 34 | 345  | 6   | 108 | 9.00E-26 | 98.6 |
| TcMYB18 | ATMYB110  | 46.15 | 104 | 56  | 1  | 34 | 345  | 67  | 169 | 1.00E-25 | 99.8 |
| TcMYB18 | ATMYB52   | 44.64 | 112 | 61  | 2  | 34 | 366  | 5   | 114 | 1.00E-25 | 98.2 |
| TcMYB18 | ATMYB69   | 45.87 | 109 | 57  | 2  | 25 | 345  | 16  | 121 | 1.00E-25 | 98.2 |
| TcMYB18 | AtMYB22   | 40.95 | 105 | 62  | 2  | 28 | 342  | 52  | 154 | 7.00E-22 | 87.8 |
| TcMYB18 | ATMYB91   | 37.86 | 103 | 62  | 1  | 43 | 345  | 7   | 109 | 7.00E-21 | 86.7 |
| TcMYB18 | AtMYB89   | 39.81 | 103 | 59  | 2  | 37 | 336  | 57  | 155 | 4.00E-19 | 78.2 |
| TcMYB18 | AtMYB124  | 32.67 | 101 | 68  | 1  | 43 | 345  | 28  | 127 | 3.00E-16 | 73.2 |
| TcMYB18 | ATMYB88   | 31.37 | 102 | 69  | 2  | 43 | 345  | 33  | 132 | 1.00E-14 | 68.2 |
| TcMYB19 | AtMYB109  | 38.84 | 363 | 216 | 11 | 10 | 1080 | 47  | 335 | 6.00E-68 | 216  |
| TcMYB19 | ATMYB25   | 33.41 | 419 | 272 | 13 | 13 | 1248 | 42  | 362 | 2.00E-56 | 184  |
| TcMYB19 | AtMYB1    | 36.67 | 360 | 224 | 10 | 7  | 1074 | 46  | 325 | 1.00E-55 | 183  |
| TcMYB19 | ATMYB44   | 55.47 | 137 | 61  | 1  | 28 | 438  | 3   | 111 | 6.00E-46 | 155  |
| TcMYB19 | ATMYB73   | 57.58 | 132 | 56  | 1  | 28 | 423  | 10  | 113 | 6.00E-46 | 155  |
| TcMYB19 | AtMYB70   | 57.04 | 135 | 58  | 1  | 28 | 432  | 10  | 116 | 1.00E-45 | 154  |
| TcMYB19 | ATMYB77   | 54.07 | 135 | 62  | 1  | 28 | 432  | 3   | 109 | 3.00E-44 | 150  |
| TcMYB19 | ATMYB54   | 44.19 | 129 | 72  | 1  | 37 | 423  | 6   | 106 | 6.00E-34 | 120  |
| TcMYB19 | ATMYB52   | 43.41 | 129 | 73  | 1  | 37 | 423  | 5   | 105 | 5.00E-33 | 118  |
| TcMYB19 | AtMYB117  | 43.08 | 130 | 74  | 1  | 37 | 426  | 98  | 199 | 7.00E-32 | 118  |
| TcMYB19 | ATMYB69   | 42.64 | 129 | 74  | 1  | 37 | 423  | 19  | 119 | 1.00E-31 | 115  |
| TcMYB19 | ATMYB105  | 42.31 | 130 | 75  | 1  | 37 | 426  | 107 | 208 | 3.00E-31 | 115  |
| TcMYB19 | ATMYB118  | 40.62 | 160 | 95  | 2  | 34 | 513  | 188 | 319 | 4.00E-31 | 117  |
| TcMYB19 | AtMYB56   | 42.64 | 129 | 74  | 1  | 37 | 423  | 93  | 193 | 2.00E-30 | 113  |
| TcMYB19 | AtMYB98   | 42.75 | 131 | 75  | 2  | 34 | 426  | 216 | 318 | 2.00E-30 | 115  |
| TcMYB19 | ATMYB110  | 40.31 | 129 | 77  | 1  | 37 | 423  | 67  | 167 | 3.00E-28 | 106  |
| TcMYB19 | ATMYB119  | 31.88 | 207 | 123 | 6  | 34 | 600  | 104 | 281 | 4.00E-28 | 108  |
| TcMYB19 | AtMYB51   | 35.67 | 171 | 107 | 4  | 37 | 540  | 15  | 156 | 5.00E-28 | 107  |
| TcMYB19 | ATMYB121  | 32.75 | 229 | 143 | 7  | 37 | 690  | 29  | 218 | 7.00E-28 | 105  |
| TcMYB19 | AtMYB64   | 41.54 | 130 | 76  | 2  | 34 | 423  | 104 | 205 | 7.00E-28 | 107  |
| TcMYB19 | AtMYB27   | 35.98 | 189 | 116 | 6  | 37 | 588  | 11  | 170 | 1.00E-26 | 100  |
| TcMYB19 | ATMYB59-3 | 32.32 | 198 | 128 | 4  | 25 | 600  | 6   | 174 | 2.00E-26 | 100  |
| TcMYB19 | AtMYB115  | 38.28 | 128 | 79  | 1  | 37 | 420  | 158 | 257 | 2.00E-26 | 102  |
| TcMYB19 | ATMYB48   | 40.46 | 131 | 76  | 3  | 37 | 423  | 9   | 110 | 5.00E-26 | 99.4 |
| TcMYB19 | ATMYB48   | 31.48 | 54  | 37  | 1  | 37 | 198  | 62  | 114 | 3.00E-04 | 34.7 |
| TcMYB19 | ATMYB66   | 32.76 | 232 | 137 | 8  | 7  | 645  | 8   | 199 | 5.00E-26 | 97.8 |
| TcMYB19 | AtMYB17   | 39.26 | 135 | 80  | 3  | 37 | 435  | 14  | 119 | 8.00E-26 | 99.8 |
| TcMYB19 | AtMYB19   | 33.85 | 192 | 125 | 4  | 4  | 573  | 3   | 162 | 1.00E-25 | 98.6 |
| TcMYB19 | ATMYB63   | 33.33 | 186 | 115 | 4  | 37 | 567  | 16  | 169 | 3.00E-25 | 98.2 |
| TcMYB19 | AtMYB45   | 33.33 | 192 | 126 | 4  | 25 | 594  | 16  | 168 | 3.00E-25 | 97.4 |
| TcMYB19 | ATMYB15   | 35.2  | 196 | 120 | 6  | 37 | 603  | 14  | 180 | 4.00E-25 | 97.4 |
| TcMYB19 | AtMYB107  | 40.15 | 137 | 79  | 3  | 37 | 438  | 14  | 122 | 5.00E-25 | 97.8 |
| TcMYB19 | ATMYB96   | 37.04 | 162 | 93  | 4  | 37 | 495  | 14  | 143 | 8.00E-25 | 97.8 |

|         |          |       |     |     |   |    |     |    |     |          |      |
|---------|----------|-------|-----|-----|---|----|-----|----|-----|----------|------|
| TcMYB19 | AtMYB36  | 40.15 | 137 | 80  | 3 | 37 | 441 | 14 | 122 | 9.00E-25 | 97.4 |
| TcMYB19 | AtMYB10  | 33.69 | 187 | 120 | 6 | 37 | 585 | 16 | 168 | 1.00E-24 | 95.1 |
| TcMYB19 | ATMYB5   | 40.76 | 157 | 89  | 5 | 37 | 495 | 25 | 153 | 1.00E-24 | 95.1 |
| TcMYB19 | AtMYB47  | 38.03 | 142 | 85  | 3 | 37 | 453 | 14 | 127 | 1.00E-24 | 95.5 |
| TcMYB19 | ATMYB31  | 34.76 | 164 | 102 | 4 | 37 | 513 | 14 | 144 | 2.00E-24 | 96.7 |
| TcMYB19 | ATMYB101 | 31.96 | 194 | 124 | 5 | 37 | 594 | 20 | 184 | 2.00E-24 | 98.6 |
| TcMYB19 | AtMYB9   | 40.88 | 137 | 78  | 3 | 37 | 438 | 14 | 122 | 2.00E-24 | 96.7 |
| TcMYB19 | AtMYB93  | 40.15 | 137 | 79  | 3 | 37 | 438 | 14 | 122 | 2.00E-24 | 96.7 |
| TcMYB19 | ATMYB30  | 34.71 | 170 | 105 | 4 | 37 | 528 | 14 | 151 | 3.00E-24 | 95.5 |
| TcMYB19 | AtMYB74  | 39.42 | 137 | 80  | 3 | 37 | 438 | 15 | 123 | 4.00E-24 | 95.5 |
| TcMYB19 | ATMYB95  | 37.84 | 148 | 89  | 3 | 37 | 471 | 14 | 133 | 4.00E-24 | 94.4 |
| TcMYB19 | ATMYB72  | 36.36 | 187 | 114 | 7 | 37 | 582 | 16 | 169 | 4.00E-24 | 94.7 |
| TcMYB19 | ATMYB120 | 40.31 | 129 | 76  | 2 | 37 | 420 | 28 | 128 | 4.00E-24 | 97.4 |
| TcMYB19 | AtMYB89  | 35.43 | 127 | 82  | 1 | 40 | 420 | 57 | 155 | 4.00E-24 | 92   |
| TcMYB19 | AtMYB53  | 39.85 | 133 | 78  | 3 | 37 | 429 | 14 | 117 | 5.00E-24 | 94.7 |
| TcMYB19 | AtMYB97  | 34.38 | 160 | 103 | 3 | 4  | 477 | 10 | 141 | 6.00E-24 | 95.9 |
| TcMYB19 | AtMYB60  | 40.3  | 134 | 75  | 3 | 37 | 423 | 14 | 115 | 6.00E-24 | 94   |
| TcMYB19 | AtMYB18  | 40.58 | 138 | 80  | 4 | 22 | 429 | 7  | 115 | 6.00E-24 | 94   |
| TcMYB19 | ATMYB67  | 34.07 | 182 | 115 | 6 | 22 | 552 | 18 | 165 | 7.00E-24 | 94.4 |
| TcMYB19 | ATMYB3   | 40.15 | 137 | 79  | 3 | 37 | 438 | 14 | 122 | 7.00E-24 | 93.2 |
| TcMYB19 | ATMYB122 | 35.12 | 168 | 106 | 4 | 37 | 531 | 14 | 153 | 7.00E-24 | 94.7 |
| TcMYB19 | AtMYB81  | 37.32 | 142 | 87  | 3 | 37 | 456 | 22 | 135 | 8.00E-24 | 95.9 |
| TcMYB19 | ATMYB14  | 29.52 | 210 | 143 | 6 | 37 | 651 | 14 | 183 | 9.00E-24 | 92.8 |
| TcMYB19 | AtMYB50  | 40.4  | 151 | 85  | 5 | 37 | 474 | 14 | 135 | 1.00E-23 | 93.6 |
| TcMYB19 | ATMYB34  | 39.19 | 148 | 86  | 4 | 37 | 468 | 14 | 133 | 1.00E-23 | 93.2 |
| TcMYB19 | ATMYB94  | 38.81 | 134 | 77  | 3 | 37 | 423 | 14 | 115 | 2.00E-23 | 93.6 |
| TcMYB19 | AtMYB41  | 37.96 | 137 | 82  | 3 | 37 | 438 | 14 | 122 | 2.00E-23 | 92.4 |
| TcMYB19 | ATMYB92  | 37.59 | 133 | 81  | 3 | 37 | 429 | 14 | 117 | 3.00E-23 | 93.2 |
| TcMYB19 | ATMYB106 | 37.18 | 156 | 91  | 4 | 37 | 483 | 57 | 184 | 3.00E-23 | 94   |
| TcMYB19 | ATMYB35  | 30.05 | 213 | 135 | 5 | 37 | 633 | 14 | 195 | 3.00E-23 | 92.8 |
| TcMYB19 | ATMYB65  | 39.23 | 130 | 78  | 2 | 37 | 423 | 43 | 144 | 3.00E-23 | 95.1 |
| TcMYB19 | ATMYB13  | 32.12 | 193 | 124 | 6 | 37 | 594 | 14 | 165 | 3.00E-23 | 91.3 |
| TcMYB19 | ATMYB80  | 36.57 | 134 | 84  | 2 | 37 | 435 | 14 | 119 | 3.00E-23 | 92.8 |
| TcMYB19 | ATMYB102 | 39.42 | 137 | 80  | 3 | 37 | 438 | 14 | 122 | 3.00E-23 | 93.2 |
| TcMYB19 | AtMYB49  | 36.49 | 148 | 91  | 3 | 4  | 438 | 3  | 122 | 4.00E-23 | 92.4 |
| TcMYB19 | ATMYB87  | 39.85 | 133 | 78  | 3 | 37 | 429 | 14 | 118 | 4.00E-23 | 92   |
| TcMYB19 | ATMYB84  | 32.95 | 176 | 108 | 5 | 37 | 534 | 14 | 159 | 4.00E-23 | 92   |
| TcMYB19 | MYB8     | 38.69 | 137 | 81  | 3 | 37 | 438 | 14 | 122 | 7.00E-23 | 89.4 |
| TcMYB19 | MYB8     | 31.17 | 77  | 53  | 3 | 37 | 267 | 67 | 137 | 6.00E-04 | 33.5 |
| TcMYB19 | AtMYB116 | 34.69 | 147 | 93  | 3 | 7  | 438 | 10 | 128 | 7.00E-23 | 90.9 |
| TcMYB19 | ATMYB55  | 33.69 | 187 | 104 | 5 | 37 | 537 | 14 | 171 | 7.00E-23 | 92   |
| TcMYB19 | ATMYB33  | 39.23 | 130 | 78  | 2 | 37 | 423 | 34 | 135 | 1.00E-22 | 93.2 |
| TcMYB19 | AtMYB42  | 33.14 | 172 | 113 | 5 | 37 | 546 | 14 | 151 | 1.00E-22 | 90.5 |
| TcMYB19 | ATMYB37  | 39.85 | 133 | 78  | 3 | 37 | 429 | 14 | 118 | 1.00E-22 | 91.3 |
| TcMYB19 | AtMYB83  | 34.92 | 189 | 122 | 4 | 10 | 573 | 23 | 175 | 1.00E-22 | 91.3 |
| TcMYB19 | AtMYB24  | 36.69 | 139 | 86  | 3 | 10 | 420 | 9  | 119 | 1.00E-22 | 88.6 |
| TcMYB19 | ATMYB4   | 36.53 | 167 | 100 | 5 | 37 | 519 | 14 | 151 | 1.00E-22 | 90.1 |
| TcMYB19 | ATMYB23  | 37.41 | 139 | 85  | 3 | 13 | 423 | 6  | 115 | 1.00E-22 | 88.6 |
| TcMYB19 | AtMYB6   | 32.81 | 192 | 116 | 5 | 37 | 573 | 14 | 177 | 1.00E-22 | 89   |
| TcMYB19 | ATMYB46  | 31.38 | 188 | 128 | 4 | 37 | 597 | 20 | 175 | 2.00E-22 | 89.4 |
| TcMYB19 | ATMYB16  | 36.54 | 156 | 90  | 4 | 37 | 477 | 14 | 141 | 3.00E-22 | 90.1 |
| TcMYB19 | AtMYB104 | 35.66 | 143 | 89  | 4 | 37 | 456 | 18 | 131 | 4.00E-22 | 90.5 |
| TcMYB19 | ATMYB38  | 39.1  | 133 | 79  | 3 | 37 | 429 | 14 | 118 | 4.00E-22 | 89   |
| TcMYB19 | ATMYB68  | 33.92 | 171 | 111 | 5 | 37 | 543 | 14 | 151 | 4.00E-22 | 90.1 |
| TcMYB19 | AtMYB82  | 37.4  | 131 | 80  | 3 | 37 | 423 | 14 | 115 | 6.00E-22 | 86.3 |
| TcMYB19 | ATMYB71  | 38.17 | 131 | 79  | 3 | 37 | 423 | 20 | 121 | 9.00E-22 | 87.4 |
| TcMYB19 | MYB7     | 38.69 | 137 | 81  | 3 | 37 | 438 | 14 | 122 | 9.00E-22 | 87.4 |
| TcMYB19 | MYB7     | 30.23 | 86  | 60  | 2 | 37 | 294 | 67 | 147 | 2.00E-04 | 35   |
| TcMYB19 | ATMYB2   | 38.46 | 130 | 79  | 2 | 37 | 423 | 22 | 123 | 1.00E-21 | 87.4 |
| TcMYB19 | AtMYB32  | 36.36 | 165 | 94  | 4 | 25 | 486 | 10 | 146 | 1.00E-21 | 87.4 |
| TcMYB19 | ATMYB26  | 28.91 | 256 | 167 | 7 | 37 | 759 | 14 | 237 | 1.00E-21 | 89   |
| TcMYB19 | ATMYB123 | 38.52 | 135 | 81  | 4 | 25 | 423 | 12 | 117 | 1.00E-21 | 87   |
| TcMYB19 | AtMYB20  | 31.84 | 179 | 118 | 5 | 37 | 561 | 14 | 163 | 1.00E-21 | 87.4 |
| TcMYB19 | AtMYB103 | 38.17 | 131 | 79  | 3 | 37 | 423 | 14 | 115 | 1.00E-21 | 88.6 |
| TcMYB19 | ATMYB61  | 39.69 | 131 | 77  | 3 | 37 | 423 | 14 | 115 | 2.00E-21 | 88.2 |
| TcMYB19 | ATMYB61  | 31.48 | 54  | 37  | 1 | 37 | 198 | 67 | 119 | 7.00E-04 | 33.9 |
| TcMYB19 | ATMYB0   | 36.57 | 134 | 83  | 3 | 37 | 432 | 16 | 120 | 2.00E-21 | 85.5 |
| TcMYB19 | ATMYB86  | 38.93 | 131 | 78  | 3 | 37 | 423 | 14 | 115 | 2.00E-21 | 87.8 |
| TcMYB19 | ATMYB28  | 36.81 | 163 | 95  | 5 | 22 | 486 | 9  | 139 | 2.00E-21 | 87.8 |
| TcMYB19 | ATMYB3   | 30.73 | 179 | 122 | 3 | 7  | 537 | 12 | 162 | 3.00E-21 | 85.1 |
| TcMYB19 | AtMYB40  | 37.68 | 138 | 82  | 5 | 37 | 438 | 14 | 122 | 3.00E-21 | 85.9 |
| TcMYB19 | AtMYB100 | 28.81 | 177 | 114 | 4 | 46 | 540 | 29 | 177 | 3.00E-21 | 85.1 |
| TcMYB19 | AtMYB79  | 29.56 | 203 | 134 | 5 | 37 | 618 | 8  | 181 | 4.00E-21 | 85.5 |
| TcMYB19 | AtMYB76  | 32.18 | 202 | 127 | 6 | 22 | 597 | 9  | 178 | 4.00E-21 | 86.7 |
| TcMYB19 | ATMYB58  | 34.38 | 160 | 104 | 2 | 37 | 513 | 16 | 147 | 5.00E-21 | 85.5 |
| TcMYB19 | ATMYB57  | 37.21 | 129 | 80  | 2 | 37 | 420 | 27 | 127 | 6.00E-21 | 83.6 |
| TcMYB19 | AtMYB85  | 38.41 | 138 | 81  | 5 | 37 | 438 | 14 | 122 | 7.00E-21 | 84.7 |
| TcMYB19 | ATMYB29  | 35.33 | 167 | 91  | 4 | 22 | 471 | 9  | 143 | 4.00E-20 | 84   |
| TcMYB19 | AtMYB114 | 34.35 | 131 | 85  | 3 | 37 | 426 | 10 | 112 | 4.00E-20 | 79.3 |
| TcMYB19 | AtMYB43  | 31.64 | 177 | 112 | 6 | 37 | 540 | 14 | 161 | 1.00E-19 | 82   |

|         |           |       |     |     |   |     |      |     |     |          |      |
|---------|-----------|-------|-----|-----|---|-----|------|-----|-----|----------|------|
| TcMYB19 | ATMYB111  | 37.69 | 130 | 80  | 2 | 37  | 423  | 14  | 115 | 2.00E-19 | 81.6 |
| TcMYB19 | ATMYB12   | 36.92 | 130 | 81  | 2 | 37  | 423  | 14  | 115 | 3.00E-19 | 81.6 |
| TcMYB19 | ATMYB99   | 37.58 | 149 | 78  | 6 | 37  | 438  | 15  | 130 | 4.00E-19 | 79.3 |
| TcMYB19 | AtMYB62   | 32.87 | 143 | 93  | 4 | 4   | 423  | 9   | 122 | 4.00E-19 | 80.1 |
| TcMYB19 | ATMYB11   | 36.84 | 133 | 83  | 2 | 37  | 432  | 14  | 118 | 4.00E-19 | 80.9 |
| TcMYB19 | ATMYB90   | 34.35 | 131 | 85  | 3 | 37  | 426  | 10  | 112 | 5.00E-19 | 79   |
| TcMYB19 | ATMYB75   | 33.59 | 131 | 86  | 3 | 37  | 426  | 10  | 112 | 7.00E-19 | 78.6 |
| TcMYB19 | AtMYB113  | 34.35 | 131 | 85  | 3 | 37  | 426  | 10  | 112 | 9.00E-19 | 78.2 |
| TcMYB19 | AtMYB112  | 34.11 | 129 | 84  | 3 | 37  | 420  | 34  | 134 | 4.00E-18 | 76.3 |
| TcMYB19 | AtMYB108  | 33.57 | 143 | 92  | 4 | 1   | 420  | 8   | 121 | 6.00E-18 | 77   |
| TcMYB19 | AtMYB22   | 28.02 | 182 | 131 | 6 | 37  | 582  | 54  | 199 | 1.00E-17 | 75.1 |
| TcMYB19 | ATMYB88   | 30.5  | 141 | 98  | 2 | 1   | 423  | 18  | 130 | 4.00E-17 | 75.9 |
| TcMYB19 | AtMYB124  | 30.56 | 144 | 96  | 3 | 4   | 423  | 10  | 125 | 8.00E-17 | 74.7 |
| TcMYB19 | AtMYB124  | 33.33 | 57  | 38  | 1 | 37  | 207  | 77  | 132 | 2.00E-04 | 35.8 |
| TcMYB19 | ATMYB78   | 34.11 | 129 | 84  | 3 | 37  | 420  | 28  | 142 | 9.00E-16 | 70.5 |
| TcMYB19 | ATMYB91   | 27.32 | 183 | 124 | 4 | 46  | 567  | 7   | 161 | 4.00E-15 | 68.9 |
| TcMYB20 | ATMYB105  | 78.63 | 131 | 28  | 1 | 295 | 687  | 90  | 219 | 1.00E-70 | 218  |
| TcMYB20 | AtMYB117  | 70.55 | 146 | 41  | 1 | 256 | 687  | 65  | 210 | 6.00E-70 | 217  |
| TcMYB20 | AtMYB56   | 49.53 | 212 | 87  | 2 | 190 | 765  | 20  | 231 | 6.00E-67 | 208  |
| TcMYB20 | ATMYB52   | 76.32 | 114 | 27  | 0 | 340 | 681  | 2   | 115 | 7.00E-64 | 198  |
| TcMYB20 | ATMYB54   | 65.97 | 144 | 49  | 1 | 340 | 771  | 3   | 144 | 8.00E-64 | 197  |
| TcMYB20 | ATMYB110  | 39.86 | 296 | 178 | 7 | 280 | 1167 | 45  | 304 | 1.00E-62 | 197  |
| TcMYB20 | ATMYB69   | 73.58 | 106 | 28  | 0 | 343 | 660  | 17  | 122 | 5.00E-56 | 177  |
| TcMYB20 | AtMYB89   | 52.14 | 140 | 67  | 1 | 247 | 666  | 33  | 161 | 5.00E-47 | 152  |
| TcMYB20 | ATMYB25   | 55.24 | 105 | 47  | 0 | 349 | 663  | 50  | 154 | 8.00E-40 | 138  |
| TcMYB20 | AtMYB109  | 52.17 | 115 | 55  | 1 | 325 | 669  | 50  | 162 | 1.00E-39 | 139  |
| TcMYB20 | ATMYB44   | 55.45 | 101 | 45  | 0 | 349 | 651  | 6   | 106 | 1.00E-38 | 134  |
| TcMYB20 | AtMYB70   | 55.45 | 101 | 45  | 0 | 349 | 651  | 13  | 113 | 1.00E-37 | 131  |
| TcMYB20 | AtMYB1    | 43.42 | 152 | 86  | 2 | 199 | 654  | 9   | 156 | 9.00E-37 | 130  |
| TcMYB20 | ATMYB73   | 52.48 | 101 | 48  | 0 | 349 | 651  | 13  | 113 | 2.00E-36 | 128  |
| TcMYB20 | ATMYB77   | 52.48 | 101 | 48  | 0 | 349 | 651  | 6   | 106 | 8.00E-36 | 126  |
| TcMYB20 | ATMYB119  | 42.07 | 145 | 79  | 2 | 250 | 669  | 73  | 216 | 3.00E-32 | 119  |
| TcMYB20 | AtMYB64   | 44.44 | 135 | 75  | 1 | 349 | 753  | 105 | 227 | 2.00E-30 | 114  |
| TcMYB20 | ATMYB23   | 48.04 | 102 | 52  | 1 | 349 | 651  | 14  | 115 | 2.00E-29 | 107  |
| TcMYB20 | ATMYB66   | 42.42 | 132 | 66  | 3 | 349 | 714  | 18  | 149 | 2.00E-29 | 106  |
| TcMYB20 | ATMYB15   | 32.74 | 226 | 135 | 5 | 349 | 975  | 14  | 238 | 3.00E-29 | 108  |
| TcMYB20 | ATMYB118  | 47.17 | 106 | 56  | 0 | 349 | 666  | 189 | 294 | 7.00E-29 | 109  |
| TcMYB20 | ATMYB67   | 45.31 | 128 | 63  | 3 | 301 | 663  | 3   | 129 | 1.00E-28 | 106  |
| TcMYB20 | ATMYB0    | 47.06 | 102 | 53  | 1 | 349 | 651  | 16  | 117 | 1.00E-28 | 104  |
| TcMYB20 | AtMYB115  | 43.12 | 109 | 62  | 0 | 322 | 648  | 149 | 257 | 2.00E-28 | 107  |
| TcMYB20 | AtMYB10   | 46.3  | 108 | 56  | 2 | 349 | 666  | 16  | 122 | 2.00E-28 | 104  |
| TcMYB20 | AtMYB100  | 45.45 | 99  | 53  | 2 | 355 | 648  | 28  | 125 | 3.00E-28 | 103  |
| TcMYB20 | AtMYB103  | 47.01 | 117 | 60  | 2 | 349 | 693  | 14  | 129 | 4.00E-28 | 106  |
| TcMYB20 | ATMYB63   | 46.3  | 108 | 56  | 2 | 349 | 666  | 16  | 122 | 4.00E-28 | 105  |
| TcMYB20 | ATMYB121  | 41.26 | 143 | 77  | 3 | 331 | 738  | 23  | 164 | 5.00E-28 | 104  |
| TcMYB20 | AtMYB45   | 33.71 | 175 | 105 | 4 | 349 | 840  | 20  | 193 | 7.00E-28 | 103  |
| TcMYB20 | AtMYB19   | 47.12 | 104 | 53  | 2 | 349 | 654  | 14  | 116 | 9.00E-28 | 103  |
| TcMYB20 | AtMYB27   | 44.25 | 113 | 61  | 3 | 349 | 681  | 11  | 120 | 9.00E-28 | 102  |
| TcMYB20 | AtMYB18   | 31.78 | 214 | 137 | 5 | 349 | 963  | 12  | 211 | 1.00E-27 | 103  |
| TcMYB20 | AtMYB98   | 42.37 | 118 | 68  | 0 | 349 | 702  | 217 | 334 | 2.00E-27 | 105  |
| TcMYB20 | ATMYB58   | 36.03 | 136 | 86  | 1 | 349 | 753  | 16  | 151 | 5.00E-27 | 101  |
| TcMYB20 | AtMYB51   | 47.06 | 102 | 53  | 1 | 349 | 651  | 15  | 116 | 5.00E-27 | 103  |
| TcMYB20 | AtMYB104  | 39.68 | 126 | 75  | 1 | 349 | 723  | 18  | 143 | 5.00E-27 | 103  |
| TcMYB20 | AtMYB82   | 46.08 | 102 | 54  | 1 | 349 | 651  | 14  | 115 | 1.00E-26 | 98.6 |
| TcMYB20 | ATMYB13   | 38.82 | 152 | 83  | 5 | 349 | 774  | 14  | 164 | 2.00E-26 | 99.4 |
| TcMYB20 | ATMYB80   | 46.6  | 103 | 53  | 2 | 349 | 651  | 14  | 115 | 3.00E-26 | 100  |
| TcMYB20 | AtMYB97   | 38.73 | 142 | 86  | 2 | 349 | 771  | 21  | 159 | 4.00E-26 | 101  |
| TcMYB20 | ATMYB35   | 39.39 | 132 | 79  | 2 | 349 | 741  | 14  | 143 | 5.00E-26 | 99.8 |
| TcMYB20 | ATMYB33   | 34.36 | 163 | 106 | 2 | 256 | 741  | 10  | 165 | 5.00E-26 | 102  |
| TcMYB20 | ATMYB72   | 44.04 | 109 | 59  | 2 | 349 | 669  | 16  | 123 | 7.00E-26 | 99   |
| TcMYB20 | AtMYB40   | 45.71 | 105 | 55  | 2 | 349 | 657  | 14  | 117 | 9.00E-26 | 97.8 |
| TcMYB20 | AtMYB81   | 41.22 | 131 | 76  | 2 | 286 | 675  | 9   | 131 | 1.00E-25 | 100  |
| TcMYB20 | ATMYB101  | 41.73 | 127 | 72  | 3 | 328 | 702  | 13  | 134 | 1.00E-25 | 100  |
| TcMYB20 | AtMYB53   | 47.57 | 103 | 52  | 2 | 349 | 651  | 14  | 115 | 1.00E-25 | 98.6 |
| TcMYB20 | ATMYB59-3 | 37.93 | 145 | 88  | 3 | 349 | 777  | 10  | 152 | 1.00E-25 | 96.7 |
| TcMYB20 | ATMYB48   | 44.86 | 107 | 57  | 2 | 349 | 663  | 9   | 114 | 2.00E-25 | 96.7 |
| TcMYB20 | ATMYB46   | 40    | 115 | 67  | 2 | 331 | 669  | 14  | 127 | 2.00E-25 | 97.1 |
| TcMYB20 | AtMYB49   | 45.1  | 102 | 55  | 1 | 349 | 651  | 14  | 115 | 3.00E-25 | 97.4 |
| TcMYB20 | AtMYB41   | 44.12 | 102 | 56  | 1 | 349 | 651  | 14  | 115 | 3.00E-25 | 96.7 |
| TcMYB20 | AtMYB36   | 40    | 140 | 82  | 5 | 349 | 762  | 14  | 142 | 4.00E-25 | 97.4 |
| TcMYB20 | AtMYB50   | 30.83 | 240 | 161 | 8 | 349 | 1053 | 14  | 226 | 4.00E-25 | 97.1 |
| TcMYB20 | ATMYB68   | 37.76 | 143 | 84  | 4 | 349 | 762  | 14  | 152 | 5.00E-25 | 97.8 |
| TcMYB20 | ATMYB95   | 43.69 | 103 | 56  | 2 | 349 | 651  | 14  | 115 | 5.00E-25 | 95.9 |
| TcMYB20 | ATMYB122  | 46.88 | 96  | 50  | 1 | 349 | 633  | 14  | 109 | 6.00E-25 | 97.1 |
| TcMYB20 | ATMYB34   | 41.38 | 116 | 67  | 2 | 319 | 663  | 9   | 119 | 6.00E-25 | 96.3 |
| TcMYB20 | AtMYB79   | 40.8  | 125 | 72  | 2 | 349 | 717  | 8   | 131 | 6.00E-25 | 95.5 |
| TcMYB20 | ATMYB65   | 35    | 140 | 86  | 2 | 271 | 675  | 13  | 152 | 6.00E-25 | 99   |
| TcMYB20 | ATMYB5    | 42.45 | 106 | 60  | 1 | 349 | 663  | 25  | 130 | 9.00E-25 | 94.7 |
| TcMYB20 | AtMYB114  | 40.78 | 103 | 60  | 1 | 349 | 654  | 10  | 112 | 9.00E-25 | 91.7 |
| TcMYB20 | ATMYB86   | 42.99 | 107 | 59  | 2 | 349 | 663  | 14  | 119 | 1.00E-24 | 96.7 |

|         |          |       |     |     |    |     |      |    |     |          |      |
|---------|----------|-------|-----|-----|----|-----|------|----|-----|----------|------|
| TcMYB20 | AtMYB32  | 38.93 | 131 | 78  | 2  | 349 | 735  | 14 | 143 | 1.00E-24 | 95.1 |
| TcMYB20 | ATMYB3   | 45.63 | 103 | 54  | 2  | 349 | 651  | 14 | 115 | 1.00E-24 | 94.7 |
| TcMYB20 | MYB8     | 42.16 | 102 | 58  | 1  | 349 | 651  | 14 | 115 | 1.00E-24 | 93.6 |
| TcMYB20 | ATMYB61  | 37.93 | 145 | 87  | 4  | 349 | 774  | 14 | 151 | 1.00E-24 | 96.7 |
| TcMYB20 | AtMYB107 | 45.1  | 102 | 55  | 1  | 349 | 651  | 14 | 115 | 1.00E-24 | 95.9 |
| TcMYB20 | ATMYB120 | 36.24 | 149 | 94  | 3  | 232 | 675  | 4  | 137 | 1.00E-24 | 97.8 |
| TcMYB20 | ATMYB92  | 46.6  | 103 | 53  | 2  | 349 | 651  | 14 | 115 | 1.00E-24 | 95.9 |
| TcMYB20 | AtMYB9   | 45.1  | 102 | 55  | 1  | 349 | 651  | 14 | 115 | 1.00E-24 | 95.9 |
| TcMYB20 | ATMYB71  | 39.84 | 123 | 72  | 2  | 349 | 711  | 20 | 141 | 2.00E-24 | 94.4 |
| TcMYB20 | ATMYB84  | 43.69 | 103 | 56  | 2  | 349 | 651  | 14 | 116 | 2.00E-24 | 95.1 |
| TcMYB20 | AtMYB116 | 37.88 | 132 | 80  | 3  | 319 | 708  | 13 | 140 | 2.00E-24 | 94.4 |
| TcMYB20 | ATMYB14  | 42.61 | 115 | 64  | 2  | 349 | 687  | 14 | 127 | 2.00E-24 | 93.6 |
| TcMYB20 | AtMYB74  | 44.66 | 103 | 55  | 2  | 349 | 651  | 15 | 116 | 3.00E-24 | 94.7 |
| TcMYB20 | ATMYB123 | 36.55 | 145 | 91  | 4  | 349 | 780  | 16 | 141 | 4.00E-24 | 93.2 |
| TcMYB20 | ATMYB4   | 44.66 | 103 | 55  | 2  | 349 | 651  | 14 | 115 | 4.00E-24 | 93.6 |
| TcMYB20 | ATMYB55  | 33.14 | 175 | 84  | 5  | 349 | 774  | 14 | 185 | 4.00E-24 | 94.7 |
| TcMYB20 | AtMYB22  | 32.39 | 142 | 90  | 3  | 274 | 681  | 23 | 163 | 7.00E-24 | 92.4 |
| TcMYB20 | ATMYB2   | 47.37 | 95  | 49  | 1  | 349 | 630  | 22 | 116 | 1.00E-23 | 92.4 |
| TcMYB20 | ATMYB28  | 43.4  | 106 | 59  | 1  | 349 | 663  | 14 | 119 | 1.00E-23 | 94   |
| TcMYB20 | AtMYB83  | 41.67 | 108 | 62  | 1  | 349 | 669  | 32 | 139 | 1.00E-23 | 93.6 |
| TcMYB20 | AtMYB17  | 44.66 | 103 | 55  | 2  | 349 | 651  | 14 | 115 | 1.00E-23 | 92.8 |
| TcMYB20 | ATMYB75  | 40.78 | 103 | 60  | 1  | 349 | 654  | 10 | 112 | 1.00E-23 | 91.7 |
| TcMYB20 | AtMYB47  | 40.78 | 103 | 59  | 2  | 349 | 651  | 14 | 115 | 1.00E-23 | 92   |
| TcMYB20 | AtMYB6   | 42.72 | 103 | 57  | 2  | 349 | 651  | 14 | 115 | 1.00E-23 | 91.3 |
| TcMYB20 | ATMYB106 | 44.66 | 103 | 55  | 2  | 349 | 651  | 57 | 158 | 1.00E-23 | 94   |
| TcMYB20 | AtMYB112 | 41.44 | 111 | 64  | 2  | 301 | 630  | 19 | 128 | 1.00E-23 | 91.3 |
| TcMYB20 | ATMYB90  | 34.9  | 149 | 93  | 2  | 349 | 783  | 10 | 158 | 2.00E-23 | 91.3 |
| TcMYB20 | ATMYB94  | 41.67 | 108 | 62  | 1  | 349 | 669  | 14 | 121 | 2.00E-23 | 92.8 |
| TcMYB20 | ATMYB30  | 36.69 | 139 | 87  | 2  | 349 | 762  | 14 | 146 | 2.00E-23 | 92.4 |
| TcMYB20 | ATMYB102 | 44.66 | 103 | 55  | 2  | 349 | 651  | 14 | 115 | 3.00E-23 | 92.4 |
| TcMYB20 | ATMYB96  | 30.87 | 230 | 149 | 5  | 349 | 1008 | 14 | 241 | 3.00E-23 | 92.4 |
| TcMYB20 | AtMYB62  | 34.87 | 152 | 87  | 4  | 349 | 768  | 21 | 171 | 3.00E-23 | 91.3 |
| TcMYB20 | MYB7     | 41.75 | 103 | 58  | 2  | 349 | 651  | 14 | 115 | 4.00E-23 | 90.5 |
| TcMYB20 | AtMYB93  | 43.14 | 102 | 57  | 1  | 349 | 651  | 14 | 115 | 5.00E-23 | 92   |
| TcMYB20 | ATMYB38  | 43.69 | 103 | 56  | 2  | 349 | 651  | 14 | 116 | 5.00E-23 | 90.9 |
| TcMYB20 | ATMYB16  | 42.16 | 102 | 58  | 1  | 349 | 651  | 14 | 115 | 5.00E-23 | 91.3 |
| TcMYB20 | AtMYB76  | 32.77 | 177 | 109 | 4  | 349 | 849  | 14 | 187 | 6.00E-23 | 91.3 |
| TcMYB20 | AtMYB60  | 37.14 | 140 | 78  | 3  | 349 | 738  | 14 | 153 | 7.00E-23 | 90.1 |
| TcMYB20 | AtMYB43  | 39.2  | 125 | 74  | 2  | 349 | 717  | 14 | 137 | 8.00E-23 | 90.9 |
| TcMYB20 | ATMYB31  | 44.12 | 102 | 56  | 1  | 349 | 651  | 14 | 115 | 1.00E-22 | 90.5 |
| TcMYB20 | ATMYB3   | 36.73 | 147 | 92  | 4  | 235 | 672  | 5  | 129 | 1.00E-22 | 88.2 |
| TcMYB20 | AtMYB113 | 38.68 | 106 | 64  | 1  | 349 | 663  | 10 | 115 | 1.00E-22 | 88.6 |
| TcMYB20 | ATMYB57  | 31.14 | 167 | 113 | 3  | 349 | 843  | 27 | 183 | 2.00E-22 | 87.4 |
| TcMYB20 | AtMYB108 | 43.52 | 108 | 59  | 3  | 313 | 630  | 12 | 115 | 2.00E-22 | 89.7 |
| TcMYB20 | ATMYB111 | 37.14 | 140 | 87  | 2  | 349 | 765  | 14 | 151 | 2.00E-22 | 89.7 |
| TcMYB20 | ATMYB29  | 45.83 | 96  | 51  | 1  | 349 | 633  | 14 | 109 | 3.00E-22 | 89.4 |
| TcMYB20 | ATMYB37  | 40    | 110 | 63  | 2  | 349 | 669  | 14 | 122 | 5.00E-22 | 88.6 |
| TcMYB20 | ATMYB87  | 29.65 | 226 | 143 | 7  | 349 | 978  | 14 | 238 | 5.00E-22 | 88.2 |
| TcMYB20 | AtMYB20  | 41.51 | 106 | 60  | 2  | 349 | 660  | 14 | 118 | 9.00E-22 | 87   |
| TcMYB20 | AtMYB42  | 42.72 | 103 | 57  | 2  | 349 | 651  | 14 | 115 | 9.00E-22 | 87   |
| TcMYB20 | ATMYB11  | 34.56 | 136 | 76  | 2  | 349 | 717  | 14 | 149 | 2.00E-21 | 87   |
| TcMYB20 | AtMYB24  | 42.11 | 95  | 54  | 1  | 349 | 630  | 19 | 113 | 2.00E-21 | 84.3 |
| TcMYB20 | AtMYB85  | 42.72 | 103 | 57  | 2  | 349 | 651  | 14 | 115 | 2.00E-21 | 85.5 |
| TcMYB20 | ATMYB26  | 39.64 | 111 | 57  | 2  | 349 | 651  | 14 | 124 | 2.00E-21 | 87   |
| TcMYB20 | ATMYB12  | 40.2  | 102 | 60  | 1  | 349 | 651  | 14 | 115 | 5.00E-21 | 86.3 |
| TcMYB20 | ATMYB88  | 36.89 | 103 | 65  | 0  | 358 | 666  | 33 | 135 | 7.00E-21 | 86.7 |
| TcMYB20 | AtMYB124 | 36.89 | 103 | 65  | 0  | 358 | 666  | 28 | 130 | 1.00E-20 | 85.9 |
| TcMYB20 | ATMYB99  | 42.73 | 110 | 54  | 4  | 349 | 651  | 15 | 123 | 3.00E-20 | 82   |
| TcMYB20 | ATMYB91  | 35.9  | 117 | 72  | 1  | 349 | 690  | 4  | 120 | 7.00E-20 | 82.8 |
| TcMYB20 | ATMYB78  | 34.51 | 142 | 78  | 4  | 250 | 630  | 2  | 136 | 1.00E-19 | 81.3 |
| TcMYB21 | ATMYB33  | 41.99 | 412 | 220 | 14 | 43  | 1221 | 4  | 374 | 1.00E-83 | 259  |
| TcMYB21 | ATMYB65  | 42.71 | 377 | 207 | 9  | 118 | 1221 | 41 | 387 | 3.00E-82 | 256  |
| TcMYB21 | ATMYB120 | 66.87 | 163 | 52  | 2  | 67  | 549  | 9  | 167 | 7.00E-71 | 226  |
| TcMYB21 | ATMYB101 | 54.63 | 216 | 77  | 3  | 118 | 702  | 18 | 229 | 2.00E-70 | 224  |
| TcMYB21 | AtMYB81  | 55.91 | 186 | 78  | 3  | 91  | 636  | 7  | 188 | 5.00E-67 | 213  |
| TcMYB21 | AtMYB97  | 71.32 | 136 | 39  | 1  | 91  | 498  | 10 | 142 | 2.00E-66 | 210  |
| TcMYB21 | AtMYB74  | 47.75 | 178 | 89  | 4  | 118 | 639  | 13 | 187 | 2.00E-49 | 164  |
| TcMYB21 | ATMYB5   | 41.75 | 194 | 106 | 4  | 118 | 678  | 23 | 209 | 4.00E-49 | 160  |
| TcMYB21 | AtMYB17  | 65.38 | 104 | 36  | 0  | 118 | 429  | 12 | 115 | 1.00E-48 | 161  |
| TcMYB21 | ATMYB102 | 65.38 | 104 | 36  | 0  | 118 | 429  | 12 | 115 | 2.00E-48 | 162  |
| TcMYB21 | ATMYB15  | 40.09 | 222 | 132 | 5  | 118 | 780  | 12 | 215 | 2.00E-48 | 160  |
| TcMYB21 | AtMYB107 | 65.38 | 104 | 36  | 0  | 118 | 429  | 12 | 115 | 3.00E-48 | 160  |
| TcMYB21 | ATMYB66  | 43.68 | 174 | 89  | 1  | 79  | 573  | 3  | 176 | 5.00E-48 | 156  |
| TcMYB21 | ATMYB3   | 63.46 | 104 | 38  | 0  | 118 | 429  | 12 | 115 | 6.00E-48 | 158  |
| TcMYB21 | AtMYB41  | 61.54 | 104 | 40  | 0  | 118 | 429  | 12 | 115 | 8.00E-48 | 158  |
| TcMYB21 | ATMYB96  | 35.86 | 290 | 143 | 6  | 118 | 858  | 12 | 301 | 2.00E-47 | 159  |
| TcMYB21 | AtMYB9   | 62.62 | 107 | 40  | 0  | 118 | 438  | 12 | 118 | 2.00E-47 | 159  |
| TcMYB21 | AtMYB6   | 65.69 | 102 | 35  | 0  | 124 | 429  | 14 | 115 | 3.00E-47 | 155  |
| TcMYB21 | MYB8     | 62.5  | 104 | 39  | 0  | 118 | 429  | 12 | 115 | 6.00E-47 | 154  |
| TcMYB21 | ATMYB14  | 59.63 | 109 | 44  | 0  | 118 | 444  | 12 | 120 | 9.00E-47 | 154  |

|         |           |       |     |     |    |     |      |     |     |          |     |
|---------|-----------|-------|-----|-----|----|-----|------|-----|-----|----------|-----|
| TcMYB21 | AtMYB79   | 62.86 | 105 | 39  | 0  | 121 | 435  | 7   | 111 | 1.00E-46 | 154 |
| TcMYB21 | ATMYB57   | 60.19 | 108 | 43  | 0  | 112 | 435  | 23  | 130 | 1.00E-46 | 152 |
| TcMYB21 | MYB7      | 63.46 | 104 | 38  | 0  | 118 | 429  | 12  | 115 | 2.00E-46 | 154 |
| TcMYB21 | AtMYB32   | 47.34 | 169 | 88  | 3  | 124 | 627  | 14  | 162 | 2.00E-46 | 154 |
| TcMYB21 | ATMYB3    | 39.69 | 194 | 112 | 2  | 79  | 645  | 2   | 187 | 3.00E-46 | 152 |
| TcMYB21 | ATMYB106  | 51.8  | 139 | 66  | 2  | 118 | 531  | 55  | 190 | 5.00E-46 | 156 |
| TcMYB21 | ATMYB71   | 44.32 | 176 | 92  | 2  | 121 | 630  | 19  | 194 | 9.00E-46 | 152 |
| TcMYB21 | ATMYB4    | 64.71 | 102 | 36  | 0  | 124 | 429  | 14  | 115 | 9.00E-46 | 153 |
| TcMYB21 | ATMYB92   | 63.46 | 104 | 38  | 0  | 118 | 429  | 12  | 115 | 1.00E-45 | 154 |
| TcMYB21 | ATMYB121  | 38.49 | 239 | 136 | 5  | 121 | 804  | 28  | 245 | 1.00E-45 | 152 |
| TcMYB21 | AtMYB53   | 61.54 | 104 | 40  | 0  | 118 | 429  | 12  | 115 | 2.00E-45 | 153 |
| TcMYB21 | ATMYB13   | 47.47 | 158 | 83  | 3  | 118 | 591  | 12  | 154 | 2.00E-45 | 151 |
| TcMYB21 | ATMYB29   | 45.18 | 197 | 104 | 7  | 103 | 681  | 8   | 192 | 2.00E-45 | 153 |
| TcMYB21 | ATMYB28   | 52.08 | 144 | 68  | 3  | 103 | 531  | 8   | 147 | 2.00E-45 | 154 |
| TcMYB21 | AtMYB51   | 54.07 | 135 | 60  | 2  | 118 | 516  | 13  | 147 | 2.00E-45 | 154 |
| TcMYB21 | AtMYB24   | 54.31 | 116 | 53  | 0  | 79  | 426  | 4   | 119 | 3.00E-45 | 149 |
| TcMYB21 | ATMYB16   | 60.58 | 104 | 41  | 0  | 118 | 429  | 12  | 115 | 4.00E-45 | 152 |
| TcMYB21 | AtMYB49   | 55.56 | 126 | 53  | 2  | 118 | 486  | 12  | 137 | 4.00E-45 | 152 |
| TcMYB21 | ATMYB30   | 60.38 | 106 | 42  | 0  | 112 | 429  | 10  | 115 | 5.00E-45 | 152 |
| TcMYB21 | AtMYB76   | 47.68 | 151 | 64  | 2  | 103 | 510  | 8   | 157 | 5.00E-45 | 152 |
| TcMYB21 | AtMYB50   | 48.59 | 142 | 70  | 2  | 118 | 534  | 12  | 153 | 7.00E-45 | 151 |
| TcMYB21 | ATMYB94   | 58.88 | 107 | 44  | 0  | 118 | 438  | 12  | 118 | 1.00E-44 | 151 |
| TcMYB21 | AtMYB60   | 61.54 | 104 | 40  | 0  | 118 | 429  | 12  | 115 | 1.00E-44 | 150 |
| TcMYB21 | ATMYB58   | 41.34 | 179 | 105 | 2  | 118 | 654  | 14  | 184 | 1.00E-44 | 149 |
| TcMYB21 | ATMYB63   | 42.62 | 183 | 96  | 3  | 118 | 639  | 14  | 194 | 2.00E-44 | 150 |
| TcMYB21 | AtMYB93   | 61.54 | 104 | 40  | 0  | 118 | 429  | 12  | 115 | 2.00E-44 | 152 |
| TcMYB21 | ATMYB86   | 54.33 | 127 | 57  | 2  | 118 | 495  | 12  | 135 | 3.00E-44 | 150 |
| TcMYB21 | ATMYB31   | 60.58 | 104 | 41  | 0  | 118 | 429  | 12  | 115 | 8.00E-44 | 149 |
| TcMYB21 | ATMYB34   | 59.81 | 107 | 43  | 0  | 118 | 438  | 12  | 118 | 9.00E-44 | 148 |
| TcMYB21 | ATMYB23   | 57.28 | 103 | 44  | 0  | 121 | 429  | 13  | 115 | 1.00E-43 | 145 |
| TcMYB21 | AtMYB20   | 53.17 | 126 | 57  | 2  | 118 | 489  | 12  | 137 | 1.00E-43 | 147 |
| TcMYB21 | ATMYB99   | 52.55 | 137 | 54  | 4  | 118 | 495  | 13  | 146 | 1.00E-43 | 146 |
| TcMYB21 | AtMYB116  | 50.83 | 120 | 59  | 1  | 79  | 438  | 6   | 124 | 3.00E-43 | 146 |
| TcMYB21 | AtMYB43   | 52.99 | 134 | 61  | 2  | 118 | 513  | 12  | 145 | 3.00E-43 | 147 |
| TcMYB21 | AtMYB85   | 50    | 140 | 68  | 3  | 118 | 531  | 12  | 150 | 3.00E-43 | 145 |
| TcMYB21 | ATMYB87   | 58.49 | 106 | 43  | 1  | 115 | 429  | 11  | 116 | 4.00E-43 | 146 |
| TcMYB21 | ATMYB46   | 57.01 | 107 | 46  | 0  | 118 | 438  | 18  | 124 | 5.00E-43 | 145 |
| TcMYB21 | AtMYB62   | 51.64 | 122 | 59  | 1  | 73  | 438  | 6   | 125 | 5.00E-43 | 145 |
| TcMYB21 | ATMYB61   | 58.88 | 107 | 44  | 0  | 118 | 438  | 12  | 118 | 7.00E-43 | 147 |
| TcMYB21 | ATMYB80   | 56.19 | 105 | 46  | 0  | 115 | 429  | 11  | 115 | 1.00E-42 | 145 |
| TcMYB21 | ATMYB67   | 49.28 | 138 | 69  | 2  | 106 | 516  | 18  | 152 | 1.00E-42 | 145 |
| TcMYB21 | AtMYB42   | 58.65 | 104 | 43  | 0  | 118 | 429  | 12  | 115 | 1.00E-42 | 144 |
| TcMYB21 | AtMYB82   | 52.14 | 117 | 53  | 1  | 106 | 447  | 8   | 124 | 2.00E-42 | 142 |
| TcMYB21 | ATMYB111  | 57.69 | 104 | 44  | 0  | 118 | 429  | 12  | 115 | 2.00E-42 | 145 |
| TcMYB21 | ATMYB0    | 57.28 | 103 | 44  | 0  | 121 | 429  | 15  | 117 | 2.00E-42 | 142 |
| TcMYB21 | ATMYB72   | 40    | 190 | 102 | 4  | 118 | 651  | 14  | 199 | 5.00E-42 | 143 |
| TcMYB21 | ATMYB95   | 57.69 | 104 | 44  | 0  | 118 | 429  | 12  | 115 | 5.00E-42 | 142 |
| TcMYB21 | AtMYB83   | 42.24 | 161 | 90  | 2  | 94  | 567  | 22  | 169 | 6.00E-42 | 144 |
| TcMYB21 | ATMYB122  | 47.74 | 155 | 76  | 3  | 118 | 567  | 12  | 166 | 6.00E-42 | 144 |
| TcMYB21 | AtMYB112  | 52.83 | 106 | 50  | 0  | 118 | 435  | 32  | 137 | 7.00E-42 | 141 |
| TcMYB21 | AtMYB108  | 54.21 | 107 | 49  | 0  | 118 | 438  | 19  | 125 | 1.00E-41 | 143 |
| TcMYB21 | ATMYB12   | 55.77 | 104 | 46  | 0  | 118 | 429  | 12  | 115 | 1.00E-41 | 144 |
| TcMYB21 | ATMYB59-3 | 54.87 | 113 | 50  | 1  | 121 | 456  | 9   | 121 | 2.00E-41 | 140 |
| TcMYB21 | ATMYB84   | 44.65 | 159 | 73  | 2  | 115 | 546  | 11  | 169 | 2.00E-41 | 142 |
| TcMYB21 | ATMYB2    | 54.72 | 106 | 48  | 0  | 118 | 435  | 20  | 125 | 2.00E-41 | 141 |
| TcMYB21 | AtMYB36   | 47.22 | 144 | 71  | 3  | 115 | 531  | 11  | 146 | 2.00E-41 | 142 |
| TcMYB21 | ATMYB123  | 54.81 | 104 | 47  | 0  | 118 | 429  | 14  | 117 | 3.00E-41 | 140 |
| TcMYB21 | ATMYB35   | 54.29 | 105 | 48  | 0  | 115 | 429  | 11  | 115 | 3.00E-41 | 142 |
| TcMYB21 | ATMYB11   | 54.81 | 104 | 47  | 0  | 118 | 429  | 12  | 115 | 4.00E-41 | 142 |
| TcMYB21 | ATMYB48   | 53.98 | 113 | 51  | 1  | 121 | 456  | 8   | 120 | 5.00E-41 | 139 |
| TcMYB21 | ATMYB55   | 55.08 | 118 | 41  | 1  | 118 | 435  | 12  | 129 | 9.00E-41 | 141 |
| TcMYB21 | AtMYB40   | 48.15 | 135 | 67  | 2  | 118 | 513  | 12  | 146 | 1.00E-40 | 139 |
| TcMYB21 | AtMYB10   | 56.73 | 104 | 45  | 0  | 118 | 429  | 14  | 117 | 1.00E-40 | 138 |
| TcMYB21 | AtMYB103  | 55.14 | 107 | 48  | 0  | 118 | 438  | 12  | 118 | 2.00E-40 | 141 |
| TcMYB21 | ATMYB68   | 28.38 | 377 | 239 | 10 | 115 | 1152 | 11  | 371 | 2.00E-40 | 141 |
| TcMYB21 | AtMYB47   | 40.7  | 172 | 99  | 3  | 118 | 624  | 12  | 180 | 1.00E-39 | 136 |
| TcMYB21 | ATMYB26   | 52.21 | 113 | 45  | 1  | 118 | 429  | 12  | 124 | 2.00E-39 | 138 |
| TcMYB21 | ATMYB38   | 48.12 | 133 | 68  | 2  | 115 | 510  | 11  | 142 | 2.00E-39 | 136 |
| TcMYB21 | AtMYB104  | 52.99 | 117 | 55  | 0  | 124 | 474  | 18  | 134 | 2.00E-39 | 138 |
| TcMYB21 | AtMYB114  | 48.6  | 107 | 55  | 0  | 109 | 429  | 5   | 111 | 3.00E-39 | 131 |
| TcMYB21 | ATMYB37   | 54.29 | 105 | 47  | 1  | 118 | 429  | 12  | 116 | 2.00E-38 | 135 |
| TcMYB21 | AtMYB45   | 37.69 | 199 | 115 | 4  | 121 | 690  | 19  | 205 | 2.00E-38 | 133 |
| TcMYB21 | AtMYB27   | 53.77 | 106 | 49  | 0  | 115 | 432  | 8   | 113 | 2.00E-37 | 129 |
| TcMYB21 | ATMYB75   | 47.66 | 107 | 56  | 0  | 109 | 429  | 5   | 111 | 2.00E-37 | 129 |
| TcMYB21 | ATMYB78   | 46.28 | 121 | 51  | 1  | 118 | 438  | 26  | 146 | 6.00E-37 | 130 |
| TcMYB21 | AtMYB113  | 48.08 | 104 | 54  | 0  | 118 | 429  | 8   | 111 | 2.00E-36 | 127 |
| TcMYB21 | AtMYB19   | 52.29 | 109 | 52  | 0  | 121 | 447  | 13  | 121 | 2.00E-36 | 127 |
| TcMYB21 | ATMYB90   | 47.66 | 107 | 56  | 0  | 109 | 429  | 5   | 111 | 5.00E-36 | 126 |
| TcMYB21 | AtMYB18   | 50.49 | 103 | 51  | 0  | 121 | 429  | 11  | 113 | 2.00E-33 | 120 |
| TcMYB21 | AtMYB98   | 45.93 | 135 | 72  | 4  | 31  | 432  | 195 | 317 | 2.00E-32 | 120 |

|         |          |       |     |     |    |     |      |     |     |          |      |
|---------|----------|-------|-----|-----|----|-----|------|-----|-----|----------|------|
| TcMYB21 | AtMYB1   | 44.97 | 149 | 69  | 3  | 22  | 429  | 9   | 155 | 3.00E-32 | 119  |
| TcMYB21 | AtMYB70  | 53.92 | 102 | 47  | 1  | 124 | 429  | 13  | 113 | 8.00E-32 | 116  |
| TcMYB21 | ATMYB119 | 50.46 | 109 | 53  | 3  | 109 | 432  | 100 | 205 | 2.00E-31 | 117  |
| TcMYB21 | ATMYB73  | 51.96 | 102 | 49  | 1  | 124 | 429  | 13  | 113 | 3.00E-31 | 115  |
| TcMYB21 | ATMYB118 | 44.53 | 137 | 76  | 2  | 115 | 525  | 186 | 320 | 4.00E-31 | 116  |
| TcMYB21 | AtMYB109 | 50.44 | 113 | 55  | 2  | 94  | 429  | 46  | 156 | 1.00E-30 | 114  |
| TcMYB21 | AtMYB115 | 43.48 | 138 | 76  | 4  | 19  | 426  | 129 | 257 | 2.00E-30 | 113  |
| TcMYB21 | AtMYB64  | 50    | 104 | 51  | 3  | 124 | 432  | 105 | 205 | 8.00E-30 | 112  |
| TcMYB21 | ATMYB77  | 47.66 | 107 | 56  | 1  | 124 | 444  | 6   | 111 | 6.00E-29 | 108  |
| TcMYB21 | ATMYB44  | 50    | 102 | 51  | 1  | 124 | 429  | 6   | 106 | 6.00E-29 | 108  |
| TcMYB21 | AtMYB100 | 36.17 | 188 | 116 | 5  | 118 | 669  | 24  | 205 | 7.00E-29 | 106  |
| TcMYB21 | ATMYB25  | 49.54 | 109 | 54  | 2  | 106 | 429  | 44  | 150 | 1.00E-28 | 108  |
| TcMYB21 | AtMYB117 | 41.73 | 139 | 75  | 3  | 55  | 453  | 70  | 206 | 3.00E-28 | 107  |
| TcMYB21 | ATMYB105 | 45.22 | 115 | 62  | 2  | 97  | 438  | 98  | 210 | 3.00E-28 | 106  |
| TcMYB21 | AtMYB56  | 48.57 | 105 | 54  | 1  | 124 | 438  | 93  | 196 | 4.00E-28 | 106  |
| TcMYB21 | ATMYB52  | 46.96 | 115 | 60  | 2  | 124 | 465  | 5   | 117 | 5.00E-28 | 104  |
| TcMYB21 | ATMYB69  | 45.87 | 109 | 58  | 2  | 115 | 438  | 16  | 122 | 7.00E-28 | 103  |
| TcMYB21 | ATMYB54  | 37.42 | 155 | 95  | 4  | 124 | 582  | 6   | 152 | 6.00E-27 | 101  |
| TcMYB21 | ATMYB110 | 42.19 | 128 | 74  | 2  | 55  | 438  | 48  | 170 | 2.00E-26 | 101  |
| TcMYB21 | AtMYB22  | 40.3  | 134 | 80  | 3  | 37  | 438  | 30  | 156 | 2.00E-25 | 97.4 |
| TcMYB21 | ATMYB91  | 40.38 | 104 | 60  | 1  | 133 | 438  | 7   | 110 | 8.00E-24 | 94.7 |
| TcMYB21 | AtMYB89  | 36.09 | 133 | 82  | 3  | 127 | 516  | 57  | 178 | 2.00E-19 | 78.6 |
| TcMYB21 | AtMYB124 | 34.65 | 101 | 66  | 1  | 133 | 435  | 28  | 127 | 2.00E-17 | 76.3 |
| TcMYB21 | ATMYB88  | 31.68 | 101 | 69  | 1  | 133 | 435  | 33  | 132 | 2.00E-15 | 70.1 |
| TcMYB22 | AtMYB17  | 63.26 | 215 | 79  | 2  | 1   | 645  | 1   | 205 | 7.00E-97 | 283  |
| TcMYB22 | ATMYB16  | 69.23 | 169 | 51  | 2  | 1   | 504  | 1   | 167 | 2.00E-85 | 255  |
| TcMYB22 | ATMYB106 | 41.64 | 365 | 201 | 11 | 10  | 1068 | 47  | 374 | 5.00E-85 | 256  |
| TcMYB22 | AtMYB9   | 43.55 | 310 | 161 | 6  | 1   | 888  | 1   | 305 | 4.00E-77 | 234  |
| TcMYB22 | AtMYB93  | 39.47 | 342 | 183 | 8  | 1   | 954  | 1   | 332 | 3.00E-75 | 230  |
| TcMYB22 | AtMYB107 | 74.05 | 131 | 34  | 0  | 1   | 393  | 1   | 131 | 3.00E-74 | 226  |
| TcMYB22 | ATMYB102 | 57.98 | 188 | 73  | 2  | 1   | 546  | 1   | 188 | 8.00E-74 | 226  |
| TcMYB22 | ATMYB92  | 74.81 | 131 | 33  | 0  | 1   | 393  | 1   | 131 | 4.00E-73 | 224  |
| TcMYB22 | AtMYB49  | 41.25 | 320 | 165 | 6  | 1   | 891  | 1   | 314 | 7.00E-70 | 215  |
| TcMYB22 | AtMYB53  | 60.61 | 165 | 65  | 0  | 1   | 495  | 1   | 165 | 8.00E-70 | 214  |
| TcMYB22 | AtMYB74  | 72.31 | 130 | 35  | 1  | 1   | 387  | 1   | 130 | 8.00E-70 | 215  |
| TcMYB22 | AtMYB41  | 68.99 | 129 | 40  | 0  | 1   | 387  | 1   | 129 | 1.00E-68 | 211  |
| TcMYB22 | AtMYB85  | 46.29 | 229 | 115 | 3  | 1   | 663  | 1   | 224 | 3.00E-68 | 209  |
| TcMYB22 | ATMYB3   | 63.04 | 138 | 51  | 0  | 1   | 414  | 1   | 138 | 6.00E-67 | 205  |
| TcMYB22 | ATMYB4   | 61.64 | 146 | 56  | 0  | 1   | 438  | 1   | 146 | 7.00E-67 | 206  |
| TcMYB22 | AtMYB6   | 59.6  | 151 | 54  | 1  | 1   | 432  | 1   | 151 | 1.00E-66 | 204  |
| TcMYB22 | AtMYB43  | 65.07 | 146 | 51  | 0  | 1   | 438  | 1   | 146 | 2.00E-66 | 206  |
| TcMYB22 | MYB8     | 66.67 | 126 | 42  | 0  | 1   | 378  | 1   | 126 | 3.00E-66 | 202  |
| TcMYB22 | ATMYB34  | 41.41 | 297 | 158 | 9  | 1   | 843  | 1   | 289 | 8.00E-66 | 204  |
| TcMYB22 | MYB7     | 63.31 | 139 | 51  | 0  | 1   | 417  | 1   | 139 | 1.00E-65 | 202  |
| TcMYB22 | AtMYB42  | 70.31 | 128 | 38  | 0  | 1   | 384  | 1   | 128 | 1.00E-65 | 203  |
| TcMYB22 | ATMYB5   | 61.54 | 143 | 48  | 1  | 10  | 417  | 15  | 157 | 3.00E-65 | 201  |
| TcMYB22 | AtMYB32  | 65.91 | 132 | 45  | 0  | 1   | 396  | 1   | 132 | 3.00E-65 | 201  |
| TcMYB22 | ATMYB13  | 75.86 | 116 | 28  | 0  | 1   | 348  | 1   | 116 | 4.00E-65 | 200  |
| TcMYB22 | ATMYB15  | 57.8  | 173 | 73  | 2  | 1   | 519  | 1   | 168 | 6.00E-65 | 201  |
| TcMYB22 | ATMYB14  | 74.14 | 116 | 30  | 0  | 1   | 348  | 1   | 116 | 2.00E-64 | 199  |
| TcMYB22 | AtMYB20  | 67.69 | 130 | 42  | 0  | 1   | 390  | 1   | 130 | 3.00E-64 | 199  |
| TcMYB22 | ATMYB28  | 56.71 | 164 | 59  | 1  | 1   | 456  | 1   | 164 | 3.00E-63 | 199  |
| TcMYB22 | AtMYB51  | 67.72 | 127 | 40  | 1  | 1   | 378  | 1   | 127 | 7.00E-63 | 198  |
| TcMYB22 | ATMYB61  | 51.02 | 196 | 92  | 1  | 1   | 576  | 1   | 196 | 1.00E-62 | 198  |
| TcMYB22 | ATMYB31  | 37.87 | 301 | 169 | 4  | 1   | 849  | 1   | 299 | 6.00E-62 | 195  |
| TcMYB22 | ATMYB80  | 64.62 | 130 | 46  | 0  | 1   | 390  | 1   | 130 | 1.00E-61 | 194  |
| TcMYB22 | ATMYB30  | 53.71 | 175 | 80  | 3  | 1   | 522  | 1   | 172 | 4.00E-61 | 192  |
| TcMYB22 | ATMYB122 | 66.67 | 126 | 42  | 0  | 1   | 378  | 1   | 126 | 5.00E-61 | 192  |
| TcMYB22 | ATMYB29  | 63.24 | 136 | 50  | 0  | 1   | 408  | 1   | 136 | 5.00E-61 | 192  |
| TcMYB22 | ATMYB96  | 37.37 | 297 | 174 | 7  | 1   | 855  | 1   | 291 | 6.00E-61 | 193  |
| TcMYB22 | ATMYB86  | 34.67 | 323 | 200 | 6  | 1   | 936  | 1   | 291 | 6.00E-61 | 193  |
| TcMYB22 | AtMYB50  | 64.12 | 131 | 47  | 0  | 1   | 393  | 1   | 131 | 8.00E-61 | 191  |
| TcMYB22 | AtMYB40  | 50.27 | 187 | 90  | 2  | 1   | 552  | 1   | 180 | 1.00E-60 | 189  |
| TcMYB22 | AtMYB60  | 71.55 | 116 | 33  | 0  | 1   | 348  | 1   | 116 | 5.00E-60 | 188  |
| TcMYB22 | ATMYB12  | 48.63 | 183 | 94  | 0  | 1   | 549  | 1   | 183 | 7.00E-60 | 191  |
| TcMYB22 | ATMYB94  | 35.67 | 342 | 195 | 9  | 1   | 951  | 1   | 323 | 7.00E-60 | 189  |
| TcMYB22 | AtMYB76  | 65.62 | 128 | 44  | 0  | 1   | 384  | 1   | 128 | 8.00E-60 | 189  |
| TcMYB22 | ATMYB35  | 51.43 | 175 | 85  | 2  | 1   | 525  | 1   | 162 | 9.00E-60 | 189  |
| TcMYB22 | ATMYB11  | 70.69 | 116 | 34  | 0  | 1   | 348  | 1   | 116 | 1.00E-59 | 189  |
| TcMYB22 | ATMYB111 | 68.97 | 116 | 36  | 0  | 1   | 348  | 1   | 116 | 2.00E-59 | 189  |
| TcMYB22 | ATMYB63  | 55.76 | 165 | 72  | 2  | 4   | 495  | 4   | 167 | 3.00E-59 | 187  |
| TcMYB22 | ATMYB99  | 61.36 | 132 | 44  | 1  | 4   | 378  | 3   | 134 | 7.00E-59 | 184  |
| TcMYB22 | ATMYB95  | 61.19 | 134 | 52  | 0  | 1   | 402  | 1   | 134 | 2.00E-58 | 184  |
| TcMYB22 | ATMYB58  | 69.57 | 115 | 35  | 0  | 4   | 348  | 4   | 118 | 3.00E-58 | 183  |
| TcMYB22 | ATMYB55  | 59.33 | 150 | 49  | 2  | 1   | 414  | 1   | 148 | 1.00E-56 | 182  |
| TcMYB22 | ATMYB72  | 68.7  | 115 | 36  | 0  | 4   | 348  | 4   | 118 | 2.00E-56 | 179  |
| TcMYB22 | ATMYB67  | 64.46 | 121 | 43  | 0  | 16  | 378  | 16  | 136 | 5.00E-56 | 179  |
| TcMYB22 | AtMYB10  | 54.11 | 146 | 67  | 0  | 7   | 444  | 5   | 150 | 5.00E-55 | 174  |
| TcMYB22 | AtMYB47  | 60.16 | 128 | 51  | 0  | 1   | 384  | 1   | 128 | 2.00E-54 | 173  |
| TcMYB22 | AtMYB103 | 55.88 | 136 | 60  | 0  | 1   | 408  | 1   | 136 | 6.00E-53 | 172  |

|         |           |       |     |     |   |     |     |     |     |          |      |
|---------|-----------|-------|-----|-----|---|-----|-----|-----|-----|----------|------|
| TcMYB22 | ATMYB37   | 41.81 | 232 | 132 | 3 | 1   | 687 | 1   | 219 | 2.00E-52 | 170  |
| TcMYB22 | ATMYB87   | 62.71 | 118 | 43  | 1 | 1   | 351 | 1   | 118 | 2.00E-52 | 169  |
| TcMYB22 | ATMYB101  | 65.18 | 112 | 39  | 0 | 10  | 345 | 10  | 121 | 8.00E-51 | 170  |
| TcMYB22 | AtMYB36   | 63.56 | 118 | 42  | 1 | 1   | 351 | 1   | 118 | 1.00E-50 | 166  |
| TcMYB22 | ATMYB26   | 57.94 | 126 | 44  | 1 | 1   | 351 | 1   | 126 | 2.00E-50 | 166  |
| TcMYB22 | ATMYB38   | 54.11 | 146 | 62  | 2 | 1   | 423 | 1   | 146 | 3.00E-50 | 163  |
| TcMYB22 | ATMYB84   | 61.86 | 118 | 44  | 1 | 1   | 351 | 1   | 118 | 3.00E-49 | 161  |
| TcMYB22 | ATMYB66   | 63.46 | 104 | 38  | 0 | 37  | 348 | 17  | 120 | 5.00E-49 | 157  |
| TcMYB22 | ATMYB23   | 43.39 | 189 | 104 | 3 | 37  | 594 | 13  | 197 | 6.00E-49 | 157  |
| TcMYB22 | ATMYB68   | 61.86 | 118 | 44  | 1 | 1   | 351 | 1   | 118 | 8.00E-49 | 162  |
| TcMYB22 | ATMYB123  | 58.59 | 128 | 53  | 1 | 34  | 417 | 14  | 130 | 4.00E-48 | 157  |
| TcMYB22 | AtMYB24   | 57.5  | 120 | 51  | 0 | 34  | 393 | 17  | 136 | 8.00E-48 | 154  |
| TcMYB22 | AtMYB83   | 51.72 | 145 | 70  | 1 | 34  | 468 | 30  | 169 | 8.00E-48 | 158  |
| TcMYB22 | ATMYB46   | 62.96 | 108 | 40  | 0 | 34  | 357 | 18  | 125 | 9.00E-48 | 156  |
| TcMYB22 | ATMYB71   | 56.45 | 124 | 54  | 1 | 31  | 402 | 17  | 136 | 1.00E-47 | 156  |
| TcMYB22 | AtMYB79   | 64.08 | 103 | 37  | 0 | 37  | 345 | 7   | 109 | 3.00E-47 | 154  |
| TcMYB22 | ATMYB0    | 59.05 | 105 | 43  | 0 | 37  | 351 | 15  | 119 | 5.00E-46 | 150  |
| TcMYB22 | ATMYB120  | 63.64 | 110 | 40  | 1 | 34  | 363 | 26  | 134 | 7.00E-46 | 157  |
| TcMYB22 | ATMYB121  | 40.43 | 188 | 111 | 3 | 22  | 582 | 23  | 193 | 9.00E-46 | 151  |
| TcMYB22 | AtMYB81   | 58.41 | 113 | 47  | 1 | 25  | 363 | 17  | 128 | 1.00E-45 | 155  |
| TcMYB22 | ATMYB3    | 61.68 | 107 | 41  | 0 | 34  | 354 | 20  | 126 | 1.00E-45 | 149  |
| TcMYB22 | AtMYB82   | 59.62 | 104 | 42  | 0 | 34  | 345 | 12  | 115 | 2.00E-45 | 148  |
| TcMYB22 | AtMYB114  | 59.05 | 105 | 43  | 0 | 31  | 345 | 7   | 111 | 2.00E-45 | 145  |
| TcMYB22 | ATMYB33   | 51.47 | 136 | 66  | 2 | 34  | 441 | 32  | 164 | 6.00E-45 | 154  |
| TcMYB22 | AtMYB97   | 61.17 | 103 | 40  | 0 | 34  | 342 | 19  | 121 | 9.00E-45 | 151  |
| TcMYB22 | ATMYB65   | 58.65 | 104 | 43  | 0 | 34  | 345 | 41  | 144 | 2.00E-44 | 154  |
| TcMYB22 | ATMYB75   | 59.05 | 105 | 43  | 0 | 31  | 345 | 7   | 111 | 4.00E-44 | 146  |
| TcMYB22 | ATMYB57   | 60.95 | 105 | 41  | 0 | 34  | 348 | 25  | 129 | 9.00E-44 | 144  |
| TcMYB22 | AtMYB116  | 53.51 | 114 | 53  | 0 | 37  | 378 | 19  | 132 | 2.00E-43 | 145  |
| TcMYB22 | AtMYB113  | 55.65 | 115 | 51  | 1 | 1   | 345 | 1   | 111 | 2.00E-43 | 144  |
| TcMYB22 | ATMYB90   | 58.1  | 105 | 44  | 0 | 31  | 345 | 7   | 111 | 2.00E-42 | 141  |
| TcMYB22 | AtMYB112  | 56.25 | 112 | 47  | 1 | 25  | 354 | 29  | 140 | 2.00E-41 | 139  |
| TcMYB22 | AtMYB19   | 58.49 | 106 | 44  | 0 | 37  | 354 | 13  | 118 | 3.00E-41 | 139  |
| TcMYB22 | AtMYB62   | 52.63 | 114 | 54  | 0 | 34  | 375 | 19  | 132 | 3.00E-41 | 139  |
| TcMYB22 | ATMYB48   | 57.14 | 105 | 45  | 0 | 31  | 345 | 6   | 110 | 7.00E-41 | 137  |
| TcMYB22 | ATMYB59-3 | 57.28 | 103 | 44  | 0 | 37  | 345 | 9   | 111 | 2.00E-40 | 136  |
| TcMYB22 | AtMYB108  | 53.91 | 115 | 53  | 0 | 22  | 366 | 15  | 129 | 2.00E-40 | 138  |
| TcMYB22 | AtMYB18   | 57.55 | 106 | 45  | 0 | 37  | 354 | 11  | 116 | 3.00E-40 | 137  |
| TcMYB22 | ATMYB2    | 49.58 | 119 | 60  | 0 | 22  | 378 | 16  | 134 | 3.00E-40 | 136  |
| TcMYB22 | AtMYB45   | 55.88 | 102 | 45  | 0 | 37  | 342 | 19  | 120 | 6.00E-40 | 135  |
| TcMYB22 | AtMYB27   | 58.65 | 104 | 43  | 0 | 34  | 345 | 9   | 112 | 7.00E-40 | 134  |
| TcMYB22 | ATMYB78   | 29.65 | 317 | 202 | 8 | 22  | 909 | 22  | 295 | 2.00E-37 | 130  |
| TcMYB22 | AtMYB104  | 41.73 | 139 | 81  | 1 | 40  | 456 | 18  | 155 | 9.00E-36 | 127  |
| TcMYB22 | AtMYB109  | 40.28 | 144 | 66  | 3 | 40  | 411 | 56  | 197 | 6.00E-30 | 111  |
| TcMYB22 | AtMYB64   | 27.04 | 307 | 210 | 8 | 40  | 918 | 105 | 391 | 1.00E-29 | 110  |
| TcMYB22 | ATMYB77   | 48.04 | 102 | 53  | 1 | 40  | 345 | 6   | 106 | 2.00E-29 | 108  |
| TcMYB22 | ATMYB73   | 49.02 | 102 | 52  | 1 | 40  | 345 | 13  | 113 | 2.00E-29 | 108  |
| TcMYB22 | AtMYB98   | 44.44 | 108 | 60  | 1 | 22  | 345 | 211 | 317 | 4.00E-29 | 109  |
| TcMYB22 | AtMYB98   | 34.48 | 58  | 37  | 1 | 169 | 339 | 207 | 264 | 8.00E-07 | 42.7 |
| TcMYB22 | AtMYB70   | 50    | 102 | 51  | 1 | 40  | 345 | 13  | 113 | 7.00E-29 | 107  |
| TcMYB22 | ATMYB118  | 45.37 | 108 | 59  | 1 | 22  | 345 | 183 | 289 | 3.00E-28 | 107  |
| TcMYB22 | ATMYB118  | 31.67 | 60  | 40  | 1 | 184 | 360 | 184 | 243 | 1.00E-06 | 42.4 |
| TcMYB22 | ATMYB119  | 43.27 | 104 | 59  | 1 | 34  | 345 | 103 | 205 | 7.00E-28 | 106  |
| TcMYB22 | ATMYB119  | 27.03 | 74  | 53  | 1 | 199 | 417 | 105 | 178 | 1.00E-04 | 36.2 |
| TcMYB22 | ATMYB25   | 48.54 | 103 | 52  | 2 | 40  | 345 | 50  | 150 | 1.00E-27 | 104  |
| TcMYB22 | ATMYB44   | 47.06 | 102 | 54  | 1 | 40  | 345 | 6   | 106 | 1.00E-27 | 103  |
| TcMYB22 | ATMYB54   | 40.43 | 141 | 75  | 4 | 40  | 435 | 6   | 144 | 3.00E-27 | 101  |
| TcMYB22 | AtMYB1    | 32.34 | 201 | 116 | 4 | 40  | 582 | 55  | 242 | 6.00E-27 | 103  |
| TcMYB22 | AtMYB115  | 33.91 | 174 | 115 | 5 | 40  | 561 | 158 | 316 | 1.00E-26 | 101  |
| TcMYB22 | ATMYB52   | 45.1  | 102 | 56  | 1 | 40  | 345 | 5   | 105 | 1.00E-25 | 96.7 |
| TcMYB22 | ATMYB69   | 39.81 | 108 | 65  | 1 | 22  | 345 | 13  | 119 | 9.00E-24 | 91.7 |
| TcMYB22 | ATMYB105  | 41.12 | 107 | 63  | 1 | 25  | 345 | 102 | 207 | 1.00E-23 | 92.8 |
| TcMYB22 | AtMYB100  | 42.72 | 103 | 59  | 1 | 22  | 330 | 20  | 121 | 1.00E-23 | 90.9 |
| TcMYB22 | AtMYB117  | 42.31 | 104 | 60  | 1 | 34  | 345 | 96  | 198 | 6.00E-23 | 91.3 |
| TcMYB22 | ATMYB110  | 35.34 | 133 | 80  | 2 | 40  | 420 | 67  | 198 | 4.00E-22 | 88.2 |
| TcMYB22 | AtMYB56   | 39.22 | 102 | 62  | 1 | 40  | 345 | 93  | 193 | 1.00E-20 | 84.3 |
| TcMYB22 | ATMYB91   | 36.63 | 101 | 62  | 1 | 49  | 345 | 7   | 107 | 1.00E-19 | 82   |
| TcMYB22 | AtMYB124  | 39    | 100 | 61  | 1 | 46  | 345 | 27  | 125 | 1.00E-19 | 82.4 |
| TcMYB22 | AtMYB22   | 36.89 | 103 | 65  | 2 | 22  | 330 | 48  | 148 | 8.00E-19 | 77.8 |
| TcMYB22 | ATMYB88   | 37    | 100 | 63  | 1 | 46  | 345 | 32  | 130 | 2.00E-18 | 79   |
| TcMYB22 | AtMYB89   | 36    | 100 | 64  | 1 | 43  | 342 | 57  | 155 | 4.00E-18 | 74.3 |
| TcMYB23 | ATMYB67   | 73.72 | 137 | 36  | 0 | 10  | 420 | 14  | 150 | 4.00E-76 | 229  |
| TcMYB23 | AtMYB50   | 62.28 | 167 | 58  | 2 | 1   | 486 | 1   | 167 | 2.00E-75 | 228  |
| TcMYB23 | ATMYB61   | 62.15 | 177 | 51  | 2 | 1   | 483 | 1   | 177 | 9.00E-75 | 228  |
| TcMYB23 | ATMYB86   | 78.74 | 127 | 27  | 0 | 1   | 381 | 1   | 127 | 3.00E-74 | 226  |
| TcMYB23 | ATMYB55   | 68.21 | 151 | 36  | 1 | 1   | 417 | 1   | 151 | 2.00E-73 | 223  |
| TcMYB23 | ATMYB26   | 73.61 | 144 | 29  | 1 | 1   | 405 | 1   | 144 | 3.00E-73 | 224  |
| TcMYB23 | AtMYB103  | 67.12 | 146 | 48  | 1 | 1   | 438 | 1   | 144 | 3.00E-71 | 219  |
| TcMYB23 | AtMYB32   | 55.84 | 154 | 68  | 1 | 1   | 462 | 1   | 150 | 5.00E-63 | 194  |
| TcMYB23 | ATMYB3    | 61.07 | 131 | 51  | 0 | 1   | 393 | 1   | 131 | 9.00E-62 | 191  |

|         |          |       |     |     |   |    |     |    |     |          |     |
|---------|----------|-------|-----|-----|---|----|-----|----|-----|----------|-----|
| TcMYB23 | MYB7     | 58.04 | 143 | 60  | 1 | 1  | 429 | 1  | 142 | 2.00E-61 | 190 |
| TcMYB23 | AtMYB6   | 58.09 | 136 | 57  | 0 | 1  | 408 | 1  | 136 | 3.00E-61 | 189 |
| TcMYB23 | AtMYB85  | 59.86 | 142 | 56  | 1 | 1  | 423 | 1  | 142 | 1.00E-60 | 188 |
| TcMYB23 | ATMYB4   | 56.83 | 139 | 60  | 0 | 1  | 417 | 1  | 139 | 9.00E-60 | 186 |
| TcMYB23 | AtMYB42  | 56.38 | 149 | 65  | 0 | 1  | 447 | 1  | 149 | 1.00E-59 | 186 |
| TcMYB23 | ATMYB16  | 57.75 | 142 | 58  | 1 | 1  | 420 | 1  | 142 | 1.00E-59 | 187 |
| TcMYB23 | AtMYB107 | 60.63 | 127 | 50  | 0 | 1  | 381 | 1  | 127 | 3.00E-59 | 186 |
| TcMYB23 | ATMYB106 | 59.12 | 137 | 54  | 1 | 16 | 420 | 49 | 185 | 4.00E-59 | 188 |
| TcMYB23 | ATMYB46  | 63.64 | 143 | 50  | 2 | 28 | 450 | 16 | 155 | 5.00E-59 | 184 |
| TcMYB23 | AtMYB49  | 50.58 | 172 | 81  | 2 | 1  | 504 | 1  | 167 | 1.00E-58 | 184 |
| TcMYB23 | AtMYB83  | 70.94 | 117 | 31  | 1 | 7  | 348 | 18 | 134 | 5.00E-58 | 184 |
| TcMYB23 | MYB8     | 52.98 | 151 | 68  | 1 | 1  | 444 | 1  | 151 | 1.00E-57 | 179 |
| TcMYB23 | AtMYB53  | 37.38 | 321 | 193 | 9 | 1  | 939 | 1  | 302 | 2.00E-57 | 181 |
| TcMYB23 | AtMYB17  | 60.63 | 127 | 50  | 0 | 1  | 381 | 1  | 127 | 2.00E-57 | 181 |
| TcMYB23 | AtMYB93  | 61.42 | 127 | 49  | 0 | 1  | 381 | 1  | 127 | 2.00E-57 | 183 |
| TcMYB23 | ATMYB35  | 60.31 | 131 | 52  | 0 | 1  | 393 | 1  | 131 | 6.00E-57 | 180 |
| TcMYB23 | AtMYB74  | 61.42 | 127 | 48  | 1 | 1  | 378 | 1  | 127 | 9.00E-57 | 180 |
| TcMYB23 | AtMYB9   | 59.06 | 127 | 52  | 0 | 1  | 381 | 1  | 127 | 3.00E-56 | 179 |
| TcMYB23 | ATMYB102 | 61.11 | 126 | 49  | 0 | 1  | 378 | 1  | 126 | 3.00E-56 | 179 |
| TcMYB23 | AtMYB41  | 43.66 | 213 | 107 | 4 | 1  | 600 | 1  | 208 | 3.00E-56 | 177 |
| TcMYB23 | AtMYB20  | 57.14 | 140 | 60  | 1 | 1  | 420 | 1  | 136 | 5.00E-56 | 177 |
| TcMYB23 | ATMYB80  | 60.63 | 127 | 50  | 0 | 1  | 381 | 1  | 127 | 3.00E-55 | 176 |
| TcMYB23 | ATMYB28  | 36.54 | 312 | 177 | 9 | 1  | 873 | 1  | 308 | 3.00E-55 | 177 |
| TcMYB23 | AtMYB43  | 53.85 | 143 | 66  | 0 | 1  | 429 | 1  | 143 | 3.00E-55 | 176 |
| TcMYB23 | AtMYB45  | 48.81 | 168 | 83  | 3 | 22 | 516 | 14 | 178 | 2.00E-54 | 172 |
| TcMYB23 | ATMYB29  | 42.03 | 207 | 120 | 2 | 1  | 621 | 1  | 200 | 3.00E-54 | 174 |
| TcMYB23 | ATMYB92  | 58.27 | 127 | 53  | 0 | 1  | 381 | 1  | 127 | 6.00E-54 | 173 |
| TcMYB23 | ATMYB14  | 45.63 | 206 | 96  | 5 | 1  | 570 | 1  | 200 | 2.00E-53 | 169 |
| TcMYB23 | ATMYB34  | 53.1  | 145 | 66  | 1 | 16 | 444 | 6  | 150 | 3.00E-53 | 170 |
| TcMYB23 | ATMYB95  | 56.62 | 136 | 59  | 1 | 1  | 408 | 1  | 132 | 3.00E-53 | 169 |
| TcMYB23 | ATMYB5   | 51.7  | 147 | 71  | 1 | 16 | 456 | 17 | 160 | 5.00E-53 | 168 |
| TcMYB23 | AtMYB40  | 56.93 | 137 | 59  | 0 | 1  | 411 | 1  | 137 | 5.00E-53 | 168 |
| TcMYB23 | ATMYB72  | 54    | 150 | 65  | 1 | 4  | 441 | 4  | 153 | 9.00E-53 | 169 |
| TcMYB23 | AtMYB51  | 52    | 150 | 67  | 2 | 16 | 450 | 6  | 155 | 1.00E-52 | 170 |
| TcMYB23 | AtMYB19  | 60    | 130 | 52  | 1 | 25 | 414 | 9  | 133 | 3.00E-52 | 166 |
| TcMYB23 | ATMYB99  | 44.89 | 176 | 77  | 2 | 4  | 471 | 3  | 178 | 3.00E-52 | 166 |
| TcMYB23 | ATMYB58  | 51.97 | 152 | 73  | 2 | 4  | 459 | 4  | 153 | 4.00E-52 | 166 |
| TcMYB23 | ATMYB15  | 60.34 | 116 | 46  | 0 | 1  | 348 | 1  | 116 | 1.00E-51 | 165 |
| TcMYB23 | ATMYB63  | 63.48 | 115 | 42  | 0 | 4  | 348 | 4  | 118 | 3.00E-51 | 165 |
| TcMYB23 | ATMYB13  | 48.17 | 164 | 81  | 1 | 1  | 480 | 1  | 164 | 3.00E-51 | 163 |
| TcMYB23 | ATMYB12  | 51.66 | 151 | 73  | 2 | 1  | 453 | 1  | 141 | 9.00E-51 | 166 |
| TcMYB23 | AtMYB10  | 52.59 | 135 | 64  | 0 | 16 | 420 | 8  | 142 | 1.00E-50 | 161 |
| TcMYB23 | ATMYB111 | 60.17 | 118 | 47  | 0 | 1  | 354 | 1  | 118 | 1.00E-50 | 164 |
| TcMYB23 | AtMYB18  | 58.14 | 129 | 54  | 1 | 28 | 414 | 8  | 135 | 3.00E-50 | 162 |
| TcMYB23 | AtMYB76  | 55.12 | 127 | 57  | 0 | 1  | 381 | 1  | 127 | 4.00E-50 | 163 |
| TcMYB23 | ATMYB37  | 49.1  | 167 | 73  | 3 | 1  | 465 | 1  | 161 | 7.00E-50 | 162 |
| TcMYB23 | ATMYB122 | 58.2  | 122 | 51  | 0 | 16 | 381 | 6  | 127 | 4.00E-49 | 160 |
| TcMYB23 | AtMYB47  | 54.26 | 129 | 59  | 0 | 1  | 387 | 1  | 129 | 4.00E-49 | 158 |
| TcMYB23 | ATMYB94  | 48.67 | 150 | 67  | 1 | 1  | 420 | 1  | 150 | 4.00E-48 | 157 |
| TcMYB23 | AtMYB36  | 50.35 | 141 | 69  | 1 | 1  | 420 | 1  | 141 | 9.00E-48 | 157 |
| TcMYB23 | ATMYB11  | 57.76 | 116 | 49  | 0 | 1  | 348 | 1  | 116 | 2.00E-47 | 156 |
| TcMYB23 | ATMYB31  | 58.12 | 117 | 49  | 0 | 1  | 351 | 1  | 117 | 3.00E-47 | 155 |
| TcMYB23 | AtMYB112 | 46.21 | 145 | 78  | 0 | 31 | 465 | 31 | 175 | 5.00E-47 | 152 |
| TcMYB23 | ATMYB66  | 62.5  | 104 | 39  | 0 | 37 | 348 | 17 | 120 | 9.00E-47 | 150 |
| TcMYB23 | ATMYB30  | 50.36 | 139 | 65  | 1 | 16 | 420 | 6  | 144 | 1.00E-46 | 153 |
| TcMYB23 | AtMYB60  | 56.9  | 116 | 50  | 0 | 1  | 348 | 1  | 116 | 2.00E-46 | 152 |
| TcMYB23 | ATMYB96  | 57.76 | 116 | 49  | 0 | 1  | 348 | 1  | 116 | 2.00E-46 | 154 |
| TcMYB23 | ATMYB57  | 56.03 | 116 | 51  | 0 | 34 | 381 | 25 | 140 | 3.00E-46 | 149 |
| TcMYB23 | ATMYB23  | 45.24 | 168 | 81  | 3 | 25 | 495 | 9  | 171 | 3.00E-46 | 149 |
| TcMYB23 | ATMYB123 | 61.11 | 108 | 42  | 0 | 25 | 348 | 11 | 118 | 3.00E-46 | 150 |
| TcMYB23 | ATMYB68  | 34.88 | 258 | 160 | 6 | 1  | 750 | 1  | 246 | 6.00E-46 | 153 |
| TcMYB23 | AtMYB82  | 61.68 | 107 | 41  | 0 | 25 | 345 | 9  | 115 | 1.00E-45 | 147 |
| TcMYB23 | AtMYB24  | 58.18 | 110 | 46  | 0 | 31 | 360 | 16 | 125 | 2.00E-45 | 147 |
| TcMYB23 | ATMYB0   | 58.33 | 108 | 45  | 0 | 28 | 351 | 12 | 119 | 3.00E-45 | 147 |
| TcMYB23 | ATMYB84  | 55.08 | 118 | 52  | 1 | 1  | 351 | 1  | 118 | 4.00E-45 | 149 |
| TcMYB23 | ATMYB38  | 54.62 | 119 | 53  | 1 | 1  | 354 | 1  | 119 | 6.00E-45 | 148 |
| TcMYB23 | ATMYB3   | 60.58 | 104 | 41  | 0 | 31 | 342 | 19 | 122 | 1.00E-44 | 145 |
| TcMYB23 | ATMYB87  | 49.01 | 151 | 70  | 4 | 1  | 432 | 1  | 149 | 3.00E-44 | 147 |
| TcMYB23 | ATMYB121 | 41.94 | 186 | 99  | 3 | 25 | 555 | 24 | 208 | 6.00E-44 | 145 |
| TcMYB23 | AtMYB108 | 35.21 | 213 | 128 | 1 | 22 | 630 | 15 | 227 | 3.00E-43 | 144 |
| TcMYB23 | AtMYB79  | 63.11 | 103 | 38  | 0 | 37 | 345 | 7  | 109 | 4.00E-43 | 142 |
| TcMYB23 | AtMYB81  | 57.55 | 106 | 45  | 0 | 25 | 342 | 17 | 122 | 5.00E-43 | 146 |
| TcMYB23 | AtMYB116 | 46.32 | 136 | 73  | 0 | 37 | 444 | 19 | 154 | 7.00E-43 | 142 |
| TcMYB23 | ATMYB33  | 60.58 | 104 | 41  | 0 | 34 | 345 | 32 | 135 | 1.00E-42 | 147 |
| TcMYB23 | ATMYB71  | 62.14 | 103 | 39  | 0 | 37 | 345 | 19 | 121 | 3.00E-42 | 140 |
| TcMYB23 | ATMYB65  | 55.26 | 114 | 51  | 0 | 4  | 345 | 31 | 144 | 6.00E-42 | 145 |
| TcMYB23 | ATMYB101 | 50.79 | 126 | 62  | 1 | 34 | 411 | 18 | 142 | 1.00E-41 | 144 |
| TcMYB23 | ATMYB120 | 55.93 | 118 | 52  | 1 | 34 | 387 | 26 | 142 | 3.00E-41 | 143 |
| TcMYB23 | AtMYB97  | 47.3  | 148 | 71  | 2 | 34 | 456 | 19 | 165 | 7.00E-41 | 140 |
| TcMYB23 | AtMYB62  | 43.88 | 139 | 78  | 0 | 28 | 444 | 17 | 155 | 9.00E-41 | 137 |

|         |           |       |     |     |   |     |     |     |     |          |      |
|---------|-----------|-------|-----|-----|---|-----|-----|-----|-----|----------|------|
| TcMYB23 | ATMYB2    | 47.83 | 115 | 60  | 0 | 34  | 378 | 20  | 134 | 9.00E-41 | 137  |
| TcMYB23 | AtMYB114  | 55.77 | 104 | 46  | 0 | 34  | 345 | 8   | 111 | 9.00E-41 | 132  |
| TcMYB23 | ATMYB78   | 48.46 | 130 | 53  | 1 | 34  | 381 | 26  | 155 | 2.00E-39 | 134  |
| TcMYB23 | AtMYB27   | 52.25 | 111 | 53  | 0 | 25  | 357 | 6   | 116 | 4.00E-39 | 131  |
| TcMYB23 | ATMYB75   | 53.85 | 104 | 48  | 0 | 34  | 345 | 8   | 111 | 2.00E-38 | 130  |
| TcMYB23 | ATMYB59-3 | 53.27 | 107 | 50  | 0 | 25  | 345 | 5   | 111 | 4.00E-38 | 129  |
| TcMYB23 | ATMYB90   | 54.81 | 104 | 47  | 0 | 34  | 345 | 8   | 111 | 4.00E-38 | 129  |
| TcMYB23 | ATMYB48   | 54.37 | 103 | 47  | 0 | 37  | 345 | 8   | 110 | 3.00E-37 | 127  |
| TcMYB23 | AtMYB113  | 52.88 | 104 | 49  | 0 | 34  | 345 | 8   | 111 | 6.00E-37 | 126  |
| TcMYB23 | AtMYB104  | 32.35 | 272 | 181 | 7 | 25  | 831 | 13  | 256 | 4.00E-35 | 124  |
| TcMYB23 | ATMYB73   | 42.54 | 134 | 77  | 1 | 40  | 441 | 13  | 145 | 2.00E-30 | 110  |
| TcMYB23 | AtMYB115  | 49.02 | 102 | 52  | 1 | 25  | 330 | 153 | 253 | 3.00E-30 | 110  |
| TcMYB23 | ATMYB119  | 47.06 | 102 | 54  | 1 | 40  | 345 | 105 | 205 | 1.00E-29 | 110  |
| TcMYB23 | ATMYB118  | 46.3  | 108 | 57  | 2 | 25  | 345 | 184 | 289 | 2.00E-29 | 109  |
| TcMYB23 | ATMYB118  | 27.27 | 55  | 39  | 1 | 199 | 360 | 189 | 243 | 2.00E-04 | 35   |
| TcMYB23 | AtMYB98   | 46.73 | 107 | 57  | 1 | 25  | 345 | 212 | 317 | 5.00E-29 | 108  |
| TcMYB23 | AtMYB64   | 43.4  | 106 | 60  | 1 | 28  | 345 | 101 | 205 | 1.00E-28 | 107  |
| TcMYB23 | ATMYB44   | 50    | 102 | 51  | 1 | 40  | 345 | 6   | 106 | 4.00E-28 | 103  |
| TcMYB23 | ATMYB25   | 50.93 | 108 | 52  | 3 | 25  | 345 | 46  | 150 | 1.00E-27 | 103  |
| TcMYB23 | AtMYB70   | 41.43 | 140 | 76  | 2 | 40  | 441 | 13  | 151 | 2.00E-27 | 102  |
| TcMYB23 | ATMYB105  | 44.54 | 119 | 65  | 3 | 4   | 357 | 98  | 211 | 5.00E-27 | 101  |
| TcMYB23 | ATMYB77   | 49.02 | 102 | 52  | 1 | 40  | 345 | 6   | 106 | 6.00E-27 | 100  |
| TcMYB23 | AtMYB109  | 51.46 | 103 | 49  | 2 | 40  | 345 | 56  | 156 | 6.00E-27 | 102  |
| TcMYB23 | AtMYB1    | 48.08 | 104 | 54  | 1 | 40  | 351 | 55  | 157 | 2.00E-26 | 100  |
| TcMYB23 | ATMYB52   | 45.1  | 102 | 56  | 1 | 40  | 345 | 5   | 105 | 5.00E-26 | 97.1 |
| TcMYB23 | ATMYB54   | 46.6  | 103 | 54  | 2 | 40  | 345 | 6   | 106 | 2.00E-25 | 95.1 |
| TcMYB23 | AtMYB117  | 45.63 | 103 | 55  | 2 | 40  | 345 | 98  | 198 | 3.00E-25 | 97.1 |
| TcMYB23 | AtMYB100  | 37.07 | 116 | 73  | 1 | 25  | 372 | 21  | 135 | 1.00E-24 | 92.8 |
| TcMYB23 | ATMYB69   | 40.87 | 115 | 67  | 2 | 4   | 345 | 6   | 119 | 3.00E-24 | 92.4 |
| TcMYB23 | AtMYB56   | 40.74 | 108 | 64  | 1 | 22  | 345 | 87  | 193 | 3.00E-23 | 90.9 |
| TcMYB23 | ATMYB110  | 40.57 | 106 | 63  | 1 | 40  | 357 | 67  | 171 | 6.00E-23 | 89.7 |
| TcMYB23 | ATMYB88   | 38.66 | 119 | 72  | 2 | 10  | 363 | 19  | 136 | 6.00E-22 | 88.6 |
| TcMYB23 | AtMYB124  | 33.57 | 140 | 93  | 2 | 49  | 468 | 28  | 164 | 4.00E-21 | 85.9 |
| TcMYB23 | AtMYB22   | 36.21 | 116 | 74  | 2 | 25  | 372 | 49  | 162 | 9.00E-21 | 82.8 |
| TcMYB23 | ATMYB91   | 41.24 | 97  | 55  | 1 | 40  | 324 | 4   | 100 | 1.00E-18 | 78.2 |
| TcMYB23 | AtMYB89   | 36.04 | 111 | 71  | 1 | 25  | 357 | 51  | 160 | 2.00E-18 | 75.1 |
| TcMYB24 | AtMYB93   | 52.56 | 293 | 103 | 8 | 1   | 771 | 1   | 292 | 3.00E-89 | 269  |
| TcMYB24 | ATMYB16   | 69.61 | 181 | 48  | 3 | 1   | 522 | 1   | 181 | 5.00E-87 | 262  |
| TcMYB24 | AtMYB107  | 83.97 | 131 | 21  | 0 | 1   | 393 | 1   | 131 | 1.00E-84 | 255  |
| TcMYB24 | AtMYB9    | 85.5  | 131 | 19  | 0 | 1   | 393 | 1   | 131 | 3.00E-84 | 255  |
| TcMYB24 | ATMYB106  | 66.67 | 180 | 53  | 3 | 10  | 528 | 47  | 225 | 2.00E-83 | 254  |
| TcMYB24 | ATMYB92   | 60.66 | 211 | 64  | 5 | 1   | 576 | 1   | 211 | 2.00E-80 | 245  |
| TcMYB24 | AtMYB53   | 77.24 | 145 | 33  | 0 | 1   | 435 | 1   | 145 | 9.00E-80 | 243  |
| TcMYB24 | ATMYB102  | 74.83 | 143 | 36  | 1 | 1   | 429 | 1   | 141 | 2.00E-79 | 243  |
| TcMYB24 | AtMYB17   | 54.27 | 234 | 88  | 5 | 1   | 645 | 1   | 233 | 1.00E-78 | 239  |
| TcMYB24 | AtMYB74   | 75    | 144 | 35  | 2 | 1   | 429 | 1   | 142 | 1.00E-78 | 240  |
| TcMYB24 | AtMYB41   | 56.22 | 217 | 87  | 4 | 1   | 627 | 1   | 216 | 2.00E-78 | 238  |
| TcMYB24 | AtMYB49   | 72.03 | 143 | 40  | 1 | 1   | 429 | 1   | 141 | 4.00E-73 | 226  |
| TcMYB24 | AtMYB85   | 73.44 | 128 | 34  | 0 | 1   | 384 | 1   | 128 | 1.00E-68 | 213  |
| TcMYB24 | MYB8      | 66.19 | 139 | 43  | 1 | 1   | 405 | 1   | 139 | 2.00E-67 | 207  |
| TcMYB24 | AtMYB6    | 69.29 | 127 | 39  | 0 | 1   | 381 | 1   | 127 | 3.00E-67 | 207  |
| TcMYB24 | AtMYB43   | 70.23 | 131 | 39  | 0 | 1   | 393 | 1   | 131 | 3.00E-67 | 211  |
| TcMYB24 | ATMYB29   | 65.07 | 146 | 51  | 0 | 1   | 438 | 1   | 146 | 3.00E-66 | 208  |
| TcMYB24 | ATMYB28   | 65.52 | 145 | 50  | 0 | 1   | 435 | 1   | 145 | 4.00E-66 | 209  |
| TcMYB24 | MYB7      | 67.72 | 127 | 41  | 0 | 1   | 381 | 1   | 127 | 5.00E-66 | 206  |
| TcMYB24 | ATMYB4    | 67.97 | 128 | 41  | 0 | 1   | 384 | 1   | 128 | 6.00E-66 | 206  |
| TcMYB24 | AtMYB32   | 68.75 | 128 | 40  | 0 | 1   | 384 | 1   | 128 | 6.00E-66 | 206  |
| TcMYB24 | AtMYB20   | 69.53 | 128 | 39  | 0 | 1   | 384 | 1   | 128 | 1.00E-65 | 205  |
| TcMYB24 | ATMYB3    | 67.72 | 127 | 41  | 0 | 1   | 381 | 1   | 127 | 3.00E-65 | 203  |
| TcMYB24 | AtMYB42   | 68.42 | 133 | 42  | 0 | 1   | 399 | 1   | 133 | 3.00E-65 | 204  |
| TcMYB24 | ATMYB34   | 71.09 | 128 | 37  | 0 | 1   | 384 | 1   | 128 | 5.00E-65 | 204  |
| TcMYB24 | AtMYB51   | 70.31 | 128 | 37  | 1 | 1   | 381 | 1   | 128 | 2.00E-64 | 204  |
| TcMYB24 | AtMYB76   | 70.31 | 128 | 38  | 0 | 1   | 384 | 1   | 128 | 4.00E-64 | 203  |
| TcMYB24 | ATMYB14   | 75    | 116 | 29  | 0 | 1   | 348 | 1   | 116 | 5.00E-64 | 200  |
| TcMYB24 | ATMYB5    | 67.2  | 125 | 41  | 0 | 10  | 384 | 15  | 139 | 7.00E-64 | 199  |
| TcMYB24 | ATMYB80   | 58.23 | 158 | 66  | 2 | 1   | 474 | 1   | 153 | 4.00E-63 | 200  |
| TcMYB24 | ATMYB122  | 67.18 | 131 | 43  | 0 | 1   | 393 | 1   | 131 | 8.00E-63 | 199  |
| TcMYB24 | ATMYB30   | 48.39 | 217 | 107 | 4 | 1   | 636 | 1   | 215 | 3.00E-62 | 197  |
| TcMYB24 | ATMYB15   | 72.41 | 116 | 32  | 0 | 1   | 348 | 1   | 116 | 1.00E-61 | 195  |
| TcMYB24 | ATMYB72   | 73.04 | 115 | 31  | 0 | 4   | 348 | 4   | 118 | 7.00E-61 | 193  |
| TcMYB24 | AtMYB50   | 63.64 | 132 | 48  | 0 | 1   | 396 | 1   | 132 | 2.00E-60 | 193  |
| TcMYB24 | ATMYB13   | 74.14 | 116 | 30  | 0 | 1   | 348 | 1   | 116 | 2.00E-60 | 191  |
| TcMYB24 | ATMYB99   | 63.91 | 133 | 41  | 1 | 4   | 381 | 3   | 135 | 2.00E-60 | 190  |
| TcMYB24 | ATMYB86   | 66.41 | 128 | 43  | 0 | 1   | 384 | 1   | 128 | 4.00E-60 | 193  |
| TcMYB24 | ATMYB94   | 69.75 | 119 | 36  | 0 | 1   | 357 | 1   | 119 | 5.00E-60 | 192  |
| TcMYB24 | AtMYB40   | 61.36 | 132 | 51  | 0 | 1   | 396 | 1   | 132 | 5.00E-60 | 190  |
| TcMYB24 | AtMYB60   | 60.69 | 145 | 57  | 1 | 1   | 435 | 1   | 142 | 6.00E-60 | 190  |
| TcMYB24 | ATMYB63   | 70.94 | 117 | 34  | 0 | 4   | 354 | 4   | 120 | 9.00E-60 | 190  |
| TcMYB24 | ATMYB61   | 64.39 | 132 | 47  | 0 | 1   | 396 | 1   | 132 | 2.00E-59 | 192  |
| TcMYB24 | ATMYB35   | 59.7  | 134 | 54  | 0 | 1   | 402 | 1   | 134 | 2.00E-59 | 190  |

|         |           |       |     |     |   |     |     |     |     |          |      |
|---------|-----------|-------|-----|-----|---|-----|-----|-----|-----|----------|------|
| TcMYB24 | ATMYB96   | 69.83 | 116 | 35  | 0 | 1   | 348 | 1   | 116 | 5.00E-59 | 190  |
| TcMYB24 | ATMYB58   | 70.43 | 115 | 34  | 0 | 4   | 348 | 4   | 118 | 3.00E-58 | 186  |
| TcMYB24 | ATMYB95   | 63.85 | 130 | 47  | 0 | 1   | 390 | 1   | 130 | 4.00E-58 | 185  |
| TcMYB24 | ATMYB31   | 67.23 | 119 | 39  | 0 | 1   | 357 | 1   | 119 | 5.00E-58 | 187  |
| TcMYB24 | ATMYB67   | 63.64 | 121 | 44  | 0 | 16  | 378 | 16  | 136 | 4.00E-57 | 184  |
| TcMYB24 | AtMYB10   | 65.55 | 119 | 41  | 0 | 7   | 363 | 5   | 123 | 7.00E-57 | 181  |
| TcMYB24 | ATMYB55   | 59.03 | 144 | 47  | 1 | 1   | 396 | 1   | 144 | 4.00E-56 | 182  |
| TcMYB24 | ATMYB111  | 67.24 | 116 | 38  | 0 | 1   | 348 | 1   | 116 | 4.00E-56 | 182  |
| TcMYB24 | ATMYB12   | 66.38 | 116 | 39  | 0 | 1   | 348 | 1   | 116 | 2.00E-55 | 181  |
| TcMYB24 | AtMYB47   | 61.72 | 128 | 49  | 0 | 1   | 384 | 1   | 128 | 9.00E-55 | 176  |
| TcMYB24 | ATMYB11   | 66.38 | 116 | 39  | 0 | 1   | 348 | 1   | 116 | 4.00E-54 | 177  |
| TcMYB24 | AtMYB103  | 58.59 | 128 | 53  | 0 | 1   | 384 | 1   | 128 | 7.00E-53 | 174  |
| TcMYB24 | ATMYB37   | 61.79 | 123 | 46  | 1 | 1   | 366 | 1   | 123 | 2.00E-52 | 172  |
| TcMYB24 | ATMYB38   | 54    | 150 | 64  | 2 | 1   | 435 | 1   | 150 | 2.00E-52 | 171  |
| TcMYB24 | AtMYB36   | 65.25 | 118 | 40  | 1 | 1   | 351 | 1   | 118 | 2.00E-51 | 170  |
| TcMYB24 | ATMYB26   | 57.94 | 126 | 44  | 1 | 1   | 351 | 1   | 126 | 7.00E-51 | 169  |
| TcMYB24 | ATMYB84   | 63.56 | 118 | 42  | 1 | 1   | 351 | 1   | 118 | 4.00E-50 | 166  |
| TcMYB24 | ATMYB68   | 63.56 | 118 | 42  | 1 | 1   | 351 | 1   | 118 | 5.00E-50 | 167  |
| TcMYB24 | ATMYB87   | 60.17 | 118 | 46  | 1 | 1   | 351 | 1   | 118 | 2.00E-48 | 161  |
| TcMYB24 | ATMYB33   | 58.54 | 123 | 40  | 1 | 10  | 345 | 13  | 135 | 3.00E-48 | 166  |
| TcMYB24 | AtMYB83   | 66.67 | 105 | 35  | 0 | 34  | 348 | 30  | 134 | 2.00E-47 | 159  |
| TcMYB24 | ATMYB101  | 64.76 | 105 | 37  | 0 | 31  | 345 | 17  | 121 | 9.00E-47 | 161  |
| TcMYB24 | ATMYB65   | 65.38 | 104 | 36  | 0 | 34  | 345 | 41  | 144 | 1.00E-46 | 162  |
| TcMYB24 | ATMYB46   | 62.04 | 108 | 41  | 0 | 34  | 357 | 18  | 125 | 2.00E-46 | 155  |
| TcMYB24 | ATMYB71   | 63.55 | 107 | 39  | 0 | 25  | 345 | 15  | 121 | 1.00E-45 | 152  |
| TcMYB24 | ATMYB123  | 63.81 | 105 | 38  | 0 | 34  | 348 | 14  | 118 | 1.00E-45 | 152  |
| TcMYB24 | ATMYB66   | 58.88 | 107 | 44  | 0 | 28  | 348 | 14  | 120 | 2.00E-45 | 150  |
| TcMYB24 | AtMYB114  | 61.9  | 105 | 40  | 0 | 31  | 345 | 7   | 111 | 2.00E-45 | 147  |
| TcMYB24 | AtMYB24   | 60.55 | 109 | 43  | 0 | 34  | 360 | 17  | 125 | 5.00E-45 | 149  |
| TcMYB24 | AtMYB79   | 65.05 | 103 | 36  | 0 | 37  | 345 | 7   | 109 | 7.00E-45 | 150  |
| TcMYB24 | AtMYB19   | 65.09 | 106 | 37  | 0 | 37  | 354 | 13  | 118 | 8.00E-45 | 150  |
| TcMYB24 | ATMYB23   | 57.41 | 108 | 46  | 0 | 25  | 348 | 9   | 116 | 1.00E-44 | 148  |
| TcMYB24 | AtMYB81   | 57.63 | 118 | 46  | 2 | 22  | 363 | 12  | 128 | 1.00E-44 | 154  |
| TcMYB24 | ATMYB120  | 61.82 | 110 | 42  | 1 | 34  | 363 | 26  | 134 | 2.00E-44 | 155  |
| TcMYB24 | ATMYB121  | 62.26 | 106 | 40  | 0 | 25  | 342 | 24  | 129 | 4.00E-44 | 149  |
| TcMYB24 | ATMYB3    | 56.67 | 120 | 52  | 0 | 4   | 363 | 10  | 129 | 7.00E-44 | 146  |
| TcMYB24 | AtMYB112  | 62.14 | 103 | 39  | 0 | 34  | 342 | 32  | 134 | 8.00E-44 | 147  |
| TcMYB24 | ATMYB57   | 53.33 | 120 | 56  | 0 | 22  | 381 | 21  | 140 | 1.00E-43 | 145  |
| TcMYB24 | AtMYB108  | 58.26 | 115 | 48  | 0 | 22  | 366 | 15  | 129 | 1.00E-43 | 149  |
| TcMYB24 | AtMYB82   | 56.64 | 113 | 46  | 1 | 16  | 345 | 3   | 115 | 1.00E-43 | 145  |
| TcMYB24 | ATMYB75   | 60.95 | 105 | 41  | 0 | 31  | 345 | 7   | 111 | 2.00E-43 | 146  |
| TcMYB24 | AtMYB18   | 63.21 | 106 | 39  | 0 | 37  | 354 | 11  | 116 | 3.00E-43 | 146  |
| TcMYB24 | AtMYB113  | 57.39 | 115 | 49  | 1 | 1   | 345 | 1   | 111 | 7.00E-43 | 144  |
| TcMYB24 | AtMYB45   | 52.67 | 131 | 62  | 1 | 37  | 429 | 19  | 148 | 1.00E-42 | 144  |
| TcMYB24 | ATMYB0    | 56.19 | 105 | 46  | 0 | 37  | 351 | 15  | 119 | 1.00E-42 | 143  |
| TcMYB24 | AtMYB97   | 59.22 | 103 | 42  | 0 | 34  | 342 | 19  | 121 | 4.00E-42 | 146  |
| TcMYB24 | ATMYB90   | 60    | 105 | 42  | 0 | 31  | 345 | 7   | 111 | 4.00E-42 | 142  |
| TcMYB24 | AtMYB116  | 54.78 | 115 | 52  | 0 | 37  | 381 | 19  | 133 | 6.00E-42 | 143  |
| TcMYB24 | ATMYB2    | 50.43 | 115 | 57  | 0 | 22  | 366 | 16  | 130 | 2.00E-40 | 139  |
| TcMYB24 | AtMYB62   | 53.91 | 115 | 53  | 0 | 22  | 366 | 15  | 129 | 4.00E-40 | 138  |
| TcMYB24 | AtMYB27   | 57.94 | 107 | 45  | 0 | 25  | 345 | 6   | 112 | 2.00E-39 | 135  |
| TcMYB24 | ATMYB48   | 55.14 | 107 | 48  | 0 | 25  | 345 | 4   | 110 | 5.00E-39 | 134  |
| TcMYB24 | ATMYB78   | 49.61 | 129 | 51  | 1 | 22  | 366 | 22  | 150 | 3.00E-38 | 134  |
| TcMYB24 | ATMYB59-3 | 55.34 | 103 | 46  | 0 | 37  | 345 | 9   | 111 | 5.00E-38 | 131  |
| TcMYB24 | AtMYB104  | 49.07 | 108 | 55  | 1 | 40  | 363 | 18  | 124 | 1.00E-31 | 117  |
| TcMYB24 | ATMYB73   | 50.98 | 102 | 50  | 1 | 40  | 345 | 13  | 113 | 1.00E-30 | 113  |
| TcMYB24 | AtMYB70   | 50.98 | 102 | 50  | 1 | 40  | 345 | 13  | 113 | 4.00E-30 | 111  |
| TcMYB24 | ATMYB44   | 50    | 102 | 51  | 1 | 40  | 345 | 6   | 106 | 8.00E-30 | 110  |
| TcMYB24 | ATMYB77   | 49.02 | 102 | 52  | 1 | 40  | 345 | 6   | 106 | 9.00E-29 | 107  |
| TcMYB24 | ATMYB25   | 42.07 | 145 | 81  | 3 | 40  | 465 | 50  | 192 | 1.00E-28 | 108  |
| TcMYB24 | AtMYB115  | 36.42 | 173 | 105 | 6 | 40  | 543 | 158 | 321 | 3.00E-28 | 107  |
| TcMYB24 | AtMYB1    | 47.22 | 108 | 53  | 2 | 40  | 351 | 55  | 157 | 2.00E-27 | 105  |
| TcMYB24 | ATMYB54   | 43.51 | 131 | 73  | 3 | 40  | 429 | 6   | 128 | 2.00E-27 | 102  |
| TcMYB24 | ATMYB119  | 47.62 | 105 | 54  | 2 | 34  | 345 | 103 | 205 | 3.00E-27 | 105  |
| TcMYB24 | ATMYB119  | 27.27 | 55  | 39  | 1 | 199 | 360 | 105 | 159 | 9.00E-04 | 33.5 |
| TcMYB24 | AtMYB98   | 41.18 | 136 | 78  | 3 | 34  | 435 | 215 | 341 | 6.00E-27 | 104  |
| TcMYB24 | ATMYB52   | 47.57 | 103 | 53  | 2 | 40  | 345 | 5   | 105 | 1.00E-26 | 100  |
| TcMYB24 | AtMYB64   | 45.63 | 103 | 55  | 2 | 40  | 345 | 105 | 205 | 3.00E-26 | 102  |
| TcMYB24 | AtMYB109  | 48.54 | 103 | 52  | 2 | 40  | 345 | 56  | 156 | 7.00E-26 | 101  |
| TcMYB24 | ATMYB118  | 44.12 | 102 | 57  | 1 | 40  | 345 | 189 | 289 | 2.00E-25 | 100  |
| TcMYB24 | ATMYB118  | 30    | 60  | 41  | 1 | 184 | 360 | 184 | 243 | 2.00E-04 | 35.4 |
| TcMYB24 | ATMYB69   | 38.05 | 113 | 70  | 2 | 7   | 345 | 13  | 119 | 5.00E-24 | 93.2 |
| TcMYB24 | AtMYB56   | 44.12 | 102 | 57  | 1 | 40  | 345 | 93  | 193 | 1.00E-23 | 94   |
| TcMYB24 | ATMYB105  | 42.86 | 105 | 59  | 2 | 34  | 345 | 105 | 207 | 1.00E-23 | 94   |
| TcMYB24 | AtMYB117  | 43.81 | 105 | 58  | 2 | 34  | 345 | 96  | 198 | 2.00E-23 | 94   |
| TcMYB24 | AtMYB100  | 43.69 | 103 | 57  | 2 | 25  | 330 | 21  | 121 | 2.00E-22 | 88.6 |
| TcMYB24 | ATMYB110  | 40    | 105 | 63  | 1 | 40  | 354 | 67  | 170 | 3.00E-21 | 86.7 |
| TcMYB24 | AtMYB22   | 38.24 | 102 | 63  | 2 | 25  | 330 | 49  | 148 | 4.00E-19 | 79.3 |
| TcMYB24 | AtMYB22   | 25    | 52  | 39  | 0 | 184 | 339 | 49  | 100 | 2.00E-04 | 35   |
| TcMYB24 | AtMYB89   | 38    | 100 | 62  | 1 | 43  | 342 | 57  | 155 | 4.00E-18 | 75.1 |

|         |          |       |     |     |   |    |     |    |     |          |      |
|---------|----------|-------|-----|-----|---|----|-----|----|-----|----------|------|
| TcMYB24 | ATMYB91  | 35.64 | 101 | 63  | 1 | 49 | 345 | 7  | 107 | 6.00E-18 | 77.4 |
| TcMYB24 | ATMYB88  | 38.38 | 99  | 61  | 1 | 49 | 345 | 33 | 130 | 3.00E-17 | 75.9 |
| TcMYB24 | AtMYB124 | 40.4  | 99  | 59  | 1 | 49 | 345 | 28 | 125 | 5.00E-17 | 75.1 |
| TcMYB25 | AtMYB17  | 40    | 240 | 116 | 7 | 7  | 642 | 44 | 283 | 1.00E-47 | 153  |
| TcMYB25 | AtMYB85  | 45.51 | 178 | 78  | 3 | 7  | 483 | 44 | 221 | 5.00E-47 | 151  |
| TcMYB25 | ATMYB92  | 49.11 | 169 | 86  | 2 | 7  | 513 | 44 | 208 | 1.00E-46 | 152  |
| TcMYB25 | AtMYB9   | 37.5  | 264 | 123 | 7 | 7  | 672 | 44 | 299 | 2.00E-46 | 151  |
| TcMYB25 | AtMYB74  | 39.04 | 251 | 141 | 6 | 7  | 723 | 45 | 283 | 4.00E-46 | 150  |
| TcMYB25 | ATMYB102 | 71.84 | 103 | 25  | 1 | 7  | 303 | 44 | 146 | 7.00E-46 | 150  |
| TcMYB25 | AtMYB49  | 52.76 | 163 | 69  | 5 | 7  | 471 | 44 | 201 | 1.00E-45 | 149  |
| TcMYB25 | MYB7     | 55.12 | 127 | 56  | 1 | 4  | 381 | 43 | 169 | 1.00E-45 | 147  |
| TcMYB25 | AtMYB53  | 80.72 | 83  | 16  | 0 | 7  | 255 | 44 | 126 | 1.00E-45 | 149  |
| TcMYB25 | AtMYB107 | 78.31 | 83  | 18  | 0 | 7  | 255 | 44 | 126 | 1.00E-45 | 149  |
| TcMYB25 | AtMYB41  | 78.57 | 84  | 18  | 0 | 7  | 258 | 44 | 127 | 4.00E-45 | 146  |
| TcMYB25 | AtMYB32  | 66.35 | 104 | 35  | 0 | 4  | 315 | 43 | 146 | 5.00E-45 | 146  |
| TcMYB25 | ATMYB15  | 44.44 | 207 | 99  | 7 | 7  | 579 | 44 | 234 | 7.00E-45 | 146  |
| TcMYB25 | ATMYB3   | 60.34 | 116 | 46  | 0 | 4  | 351 | 43 | 158 | 4.00E-44 | 143  |
| TcMYB25 | AtMYB6   | 73.81 | 84  | 22  | 0 | 4  | 255 | 43 | 126 | 8.00E-44 | 142  |
| TcMYB25 | ATMYB4   | 73.81 | 84  | 22  | 0 | 4  | 255 | 43 | 126 | 1.00E-43 | 143  |
| TcMYB25 | ATMYB16  | 78.31 | 83  | 18  | 0 | 7  | 255 | 44 | 126 | 3.00E-43 | 143  |
| TcMYB25 | ATMYB14  | 84.93 | 73  | 11  | 0 | 7  | 225 | 44 | 116 | 3.00E-43 | 140  |
| TcMYB25 | ATMYB106 | 78.31 | 83  | 18  | 0 | 7  | 255 | 87 | 169 | 4.00E-43 | 144  |
| TcMYB25 | ATMYB5   | 73.49 | 83  | 22  | 0 | 7  | 255 | 55 | 137 | 6.00E-43 | 140  |
| TcMYB25 | AtMYB20  | 75.9  | 83  | 20  | 0 | 7  | 255 | 44 | 126 | 7.00E-43 | 140  |
| TcMYB25 | AtMYB42  | 50.68 | 148 | 65  | 2 | 7  | 426 | 44 | 180 | 1.00E-42 | 140  |
| TcMYB25 | ATMYB13  | 42.51 | 207 | 117 | 6 | 7  | 621 | 44 | 227 | 1.00E-42 | 139  |
| TcMYB25 | ATMYB58  | 40.09 | 212 | 120 | 5 | 7  | 621 | 46 | 232 | 2.00E-42 | 139  |
| TcMYB25 | MYB8     | 70.24 | 84  | 25  | 0 | 4  | 255 | 43 | 126 | 2.00E-42 | 137  |
| TcMYB25 | ATMYB99  | 73.49 | 83  | 22  | 0 | 7  | 255 | 52 | 134 | 2.00E-42 | 138  |
| TcMYB25 | AtMYB10  | 67.01 | 97  | 27  | 1 | 7  | 282 | 46 | 142 | 3.00E-42 | 138  |
| TcMYB25 | AtMYB43  | 75.9  | 83  | 20  | 0 | 7  | 255 | 44 | 126 | 3.00E-42 | 140  |
| TcMYB25 | AtMYB93  | 75.9  | 83  | 20  | 0 | 7  | 255 | 44 | 126 | 3.00E-42 | 141  |
| TcMYB25 | ATMYB28  | 46.75 | 169 | 90  | 3 | 7  | 513 | 44 | 199 | 5.00E-42 | 140  |
| TcMYB25 | ATMYB61  | 75.9  | 83  | 20  | 0 | 7  | 255 | 44 | 126 | 1.00E-41 | 139  |
| TcMYB25 | ATMYB72  | 70.21 | 94  | 25  | 1 | 7  | 279 | 46 | 139 | 3.00E-41 | 137  |
| TcMYB25 | ATMYB35  | 59.13 | 115 | 46  | 3 | 7  | 348 | 44 | 151 | 4.00E-41 | 137  |
| TcMYB25 | ATMYB122 | 45.2  | 177 | 78  | 3 | 7  | 480 | 44 | 218 | 7.00E-41 | 137  |
| TcMYB25 | AtMYB51  | 73.49 | 83  | 22  | 0 | 7  | 255 | 45 | 127 | 8.00E-41 | 137  |
| TcMYB25 | ATMYB86  | 75.9  | 83  | 20  | 0 | 7  | 255 | 44 | 126 | 1.00E-40 | 136  |
| TcMYB25 | AtMYB50  | 72.29 | 83  | 23  | 0 | 7  | 255 | 44 | 126 | 2.00E-40 | 135  |
| TcMYB25 | AtMYB76  | 49.03 | 155 | 79  | 3 | 7  | 471 | 44 | 188 | 2.00E-40 | 135  |
| TcMYB25 | ATMYB80  | 64.58 | 96  | 34  | 1 | 7  | 294 | 44 | 136 | 3.00E-40 | 135  |
| TcMYB25 | AtMYB40  | 64.84 | 91  | 32  | 0 | 7  | 279 | 44 | 134 | 6.00E-40 | 132  |
| TcMYB25 | ATMYB95  | 51.59 | 126 | 61  | 0 | 7  | 384 | 44 | 169 | 2.00E-39 | 131  |
| TcMYB25 | ATMYB63  | 80.82 | 73  | 14  | 0 | 7  | 225 | 46 | 118 | 2.00E-39 | 132  |
| TcMYB25 | ATMYB34  | 72.29 | 83  | 23  | 0 | 7  | 255 | 44 | 126 | 3.00E-39 | 131  |
| TcMYB25 | ATMYB29  | 47.85 | 163 | 78  | 4 | 7  | 474 | 44 | 206 | 4.00E-39 | 132  |
| TcMYB25 | ATMYB67  | 50    | 124 | 62  | 1 | 7  | 378 | 54 | 176 | 6.00E-39 | 131  |
| TcMYB25 | ATMYB55  | 73.17 | 82  | 22  | 0 | 10 | 255 | 57 | 138 | 1.00E-38 | 131  |
| TcMYB25 | AtMYB47  | 35.56 | 225 | 140 | 5 | 7  | 666 | 44 | 246 | 3.00E-38 | 128  |
| TcMYB25 | AtMYB83  | 79.45 | 73  | 15  | 0 | 7  | 225 | 62 | 134 | 7.00E-38 | 129  |
| TcMYB25 | ATMYB46  | 43.43 | 175 | 97  | 4 | 7  | 525 | 50 | 203 | 1.00E-37 | 127  |
| TcMYB25 | ATMYB23  | 56.07 | 107 | 44  | 1 | 10 | 321 | 45 | 151 | 1.00E-36 | 123  |
| TcMYB25 | ATMYB11  | 75.34 | 73  | 18  | 0 | 7  | 225 | 44 | 116 | 3.00E-36 | 125  |
| TcMYB25 | ATMYB123 | 78.08 | 73  | 16  | 0 | 7  | 225 | 46 | 118 | 4.00E-36 | 122  |
| TcMYB25 | ATMYB12  | 38.73 | 204 | 118 | 7 | 7  | 597 | 44 | 231 | 9.00E-36 | 124  |
| TcMYB25 | ATMYB66  | 70.83 | 72  | 21  | 0 | 10 | 225 | 49 | 120 | 1.00E-35 | 120  |
| TcMYB25 | AtMYB103 | 73.97 | 73  | 19  | 0 | 7  | 225 | 44 | 116 | 7.00E-35 | 122  |
| TcMYB25 | ATMYB37  | 39.41 | 170 | 103 | 1 | 1  | 510 | 43 | 211 | 9.00E-35 | 120  |
| TcMYB25 | AtMYB60  | 70.51 | 78  | 23  | 0 | 10 | 243 | 45 | 122 | 9.00E-35 | 119  |
| TcMYB25 | AtMYB82  | 70.83 | 72  | 21  | 0 | 7  | 222 | 44 | 115 | 1.00E-34 | 117  |
| TcMYB25 | ATMYB101 | 45.03 | 151 | 83  | 4 | 7  | 459 | 50 | 190 | 2.00E-34 | 122  |
| TcMYB25 | ATMYB0   | 67.12 | 73  | 24  | 0 | 10 | 228 | 47 | 119 | 2.00E-34 | 117  |
| TcMYB25 | ATMYB111 | 71.23 | 73  | 21  | 0 | 7  | 225 | 44 | 116 | 2.00E-34 | 120  |
| TcMYB25 | ATMYB31  | 73.33 | 75  | 20  | 0 | 10 | 234 | 45 | 119 | 2.00E-34 | 119  |
| TcMYB25 | ATMYB30  | 69.23 | 78  | 24  | 0 | 10 | 243 | 45 | 122 | 4.00E-34 | 119  |
| TcMYB25 | AtMYB19  | 45.89 | 146 | 76  | 1 | 7  | 435 | 44 | 189 | 5.00E-34 | 117  |
| TcMYB25 | AtMYB24  | 59.34 | 91  | 37  | 1 | 4  | 276 | 48 | 135 | 1.00E-33 | 115  |
| TcMYB25 | ATMYB94  | 70.67 | 75  | 22  | 0 | 10 | 234 | 45 | 119 | 3.00E-33 | 117  |
| TcMYB25 | ATMYB3   | 50    | 124 | 61  | 3 | 4  | 372 | 51 | 169 | 6.00E-33 | 113  |
| TcMYB25 | AtMYB114 | 64.86 | 74  | 26  | 0 | 1  | 222 | 38 | 111 | 6.00E-33 | 110  |
| TcMYB25 | ATMYB96  | 69.33 | 75  | 23  | 0 | 10 | 234 | 45 | 119 | 7.00E-33 | 116  |
| TcMYB25 | ATMYB26  | 69.44 | 72  | 22  | 0 | 13 | 228 | 55 | 126 | 9.00E-33 | 116  |
| TcMYB25 | AtMYB79  | 70.83 | 72  | 21  | 0 | 7  | 222 | 38 | 109 | 9.00E-33 | 114  |
| TcMYB25 | ATMYB71  | 70.83 | 72  | 21  | 0 | 7  | 222 | 50 | 121 | 2.00E-32 | 113  |
| TcMYB25 | ATMYB68  | 69.86 | 73  | 22  | 0 | 10 | 228 | 46 | 118 | 4.00E-32 | 114  |
| TcMYB25 | ATMYB84  | 68.49 | 73  | 23  | 0 | 10 | 228 | 46 | 118 | 5.00E-32 | 113  |
| TcMYB25 | AtMYB62  | 33.6  | 247 | 161 | 8 | 7  | 738 | 51 | 279 | 6.00E-32 | 112  |
| TcMYB25 | AtMYB36  | 68.49 | 73  | 23  | 0 | 10 | 228 | 46 | 118 | 7.00E-32 | 113  |
| TcMYB25 | ATMYB38  | 51.4  | 107 | 44  | 1 | 7  | 303 | 45 | 151 | 1.00E-31 | 112  |

|         |           |       |     |     |   |    |     |     |     |          |      |
|---------|-----------|-------|-----|-----|---|----|-----|-----|-----|----------|------|
| TcMYB25 | AtMYB116  | 57.14 | 84  | 36  | 0 | 4  | 255 | 49  | 132 | 1.00E-31 | 111  |
| TcMYB25 | ATMYB120  | 66.23 | 77  | 26  | 1 | 10 | 240 | 59  | 134 | 2.00E-31 | 114  |
| TcMYB25 | ATMYB57   | 64.86 | 74  | 26  | 0 | 4  | 225 | 56  | 129 | 2.00E-31 | 108  |
| TcMYB25 | AtMYB18   | 57.61 | 92  | 39  | 0 | 7  | 282 | 42  | 133 | 2.00E-31 | 110  |
| TcMYB25 | AtMYB97   | 64.47 | 76  | 27  | 1 | 13 | 240 | 53  | 127 | 3.00E-31 | 112  |
| TcMYB25 | AtMYB81   | 56.25 | 96  | 38  | 2 | 7  | 282 | 52  | 146 | 4.00E-31 | 112  |
| TcMYB25 | ATMYB87   | 65.75 | 73  | 25  | 0 | 10 | 228 | 46  | 118 | 6.00E-31 | 110  |
| TcMYB25 | ATMYB2    | 36.84 | 171 | 97  | 3 | 4  | 483 | 51  | 220 | 9.00E-31 | 108  |
| TcMYB25 | ATMYB75   | 65.28 | 72  | 25  | 0 | 7  | 222 | 40  | 111 | 1.00E-30 | 108  |
| TcMYB25 | ATMYB90   | 63.51 | 74  | 27  | 0 | 1  | 222 | 38  | 111 | 1.00E-30 | 108  |
| TcMYB25 | ATMYB121  | 69.01 | 71  | 22  | 0 | 7  | 219 | 59  | 129 | 1.00E-30 | 108  |
| TcMYB25 | ATMYB59-3 | 62.5  | 72  | 27  | 0 | 7  | 222 | 40  | 111 | 2.00E-30 | 107  |
| TcMYB25 | AtMYB27   | 33.94 | 221 | 145 | 6 | 1  | 660 | 39  | 235 | 2.00E-30 | 107  |
| TcMYB25 | ATMYB48   | 62.5  | 72  | 27  | 0 | 7  | 222 | 39  | 110 | 2.00E-30 | 107  |
| TcMYB25 | ATMYB33   | 65.71 | 70  | 24  | 0 | 13 | 222 | 66  | 135 | 3.00E-30 | 111  |
| TcMYB25 | AtMYB113  | 60.81 | 74  | 29  | 0 | 1  | 222 | 38  | 111 | 1.00E-29 | 105  |
| TcMYB25 | ATMYB65   | 62.86 | 70  | 26  | 0 | 13 | 222 | 75  | 144 | 3.00E-29 | 108  |
| TcMYB25 | AtMYB112  | 59.76 | 82  | 31  | 1 | 4  | 243 | 63  | 144 | 4.00E-29 | 103  |
| TcMYB25 | AtMYB108  | 60.76 | 79  | 31  | 0 | 7  | 243 | 51  | 129 | 4.00E-29 | 105  |
| TcMYB25 | AtMYB45   | 60.27 | 73  | 29  | 0 | 1  | 219 | 48  | 120 | 1.00E-27 | 100  |
| TcMYB25 | ATMYB78   | 50.54 | 93  | 32  | 1 | 7  | 243 | 58  | 150 | 3.00E-24 | 92.4 |
| TcMYB25 | AtMYB104  | 41.44 | 111 | 59  | 3 | 10 | 324 | 49  | 158 | 1.00E-22 | 88.6 |
| TcMYB25 | ATMYB77   | 40.48 | 126 | 75  | 3 | 19 | 396 | 39  | 160 | 2.00E-22 | 87   |
| TcMYB25 | ATMYB25   | 58.82 | 68  | 28  | 0 | 19 | 222 | 83  | 150 | 4.00E-22 | 87   |
| TcMYB25 | AtMYB98   | 52.94 | 68  | 32  | 0 | 19 | 222 | 250 | 317 | 6.00E-22 | 87   |
| TcMYB25 | AtMYB98   | 32.76 | 58  | 38  | 1 | 46 | 216 | 207 | 264 | 2.00E-06 | 40.8 |
| TcMYB25 | ATMYB73   | 55.88 | 68  | 30  | 0 | 19 | 222 | 46  | 113 | 9.00E-22 | 85.5 |
| TcMYB25 | ATMYB73   | 36.17 | 47  | 29  | 1 | 76 | 213 | 13  | 59  | 5.00E-04 | 33.1 |
| TcMYB25 | ATMYB44   | 33.33 | 159 | 71  | 3 | 19 | 390 | 39  | 197 | 1.00E-21 | 85.1 |
| TcMYB25 | AtMYB1    | 54.29 | 70  | 32  | 0 | 19 | 228 | 88  | 157 | 2.00E-21 | 85.5 |
| TcMYB25 | AtMYB1    | 36.21 | 58  | 36  | 1 | 61 | 231 | 50  | 107 | 2.00E-05 | 37.4 |
| TcMYB25 | AtMYB70   | 54.41 | 68  | 31  | 0 | 19 | 222 | 46  | 113 | 3.00E-21 | 84   |
| TcMYB25 | AtMYB70   | 32.73 | 55  | 36  | 1 | 76 | 237 | 13  | 67  | 2.00E-04 | 34.3 |
| TcMYB25 | ATMYB118  | 47.06 | 85  | 43  | 1 | 19 | 267 | 222 | 306 | 4.00E-21 | 84.7 |
| TcMYB25 | ATMYB118  | 30    | 60  | 41  | 1 | 61 | 237 | 184 | 243 | 8.00E-06 | 38.9 |
| TcMYB25 | AtMYB115  | 52.17 | 69  | 33  | 1 | 19 | 225 | 191 | 258 | 6.00E-21 | 83.6 |
| TcMYB25 | AtMYB115  | 26.23 | 61  | 43  | 2 | 49 | 225 | 148 | 208 | 3.00E-05 | 37   |
| TcMYB25 | ATMYB119  | 50    | 68  | 34  | 0 | 19 | 222 | 138 | 205 | 1.00E-20 | 83.6 |
| TcMYB25 | ATMYB119  | 29.09 | 55  | 38  | 1 | 76 | 237 | 105 | 159 | 6.00E-05 | 36.2 |
| TcMYB25 | AtMYB100  | 33.54 | 161 | 102 | 6 | 19 | 486 | 59  | 205 | 1.00E-20 | 80.9 |
| TcMYB25 | ATMYB54   | 54.41 | 68  | 31  | 0 | 19 | 222 | 39  | 106 | 2.00E-20 | 80.5 |
| TcMYB25 | ATMYB54   | 33.96 | 53  | 34  | 1 | 76 | 231 | 6   | 58  | 6.00E-05 | 35.8 |
| TcMYB25 | AtMYB109  | 55.88 | 68  | 30  | 0 | 19 | 222 | 89  | 156 | 3.00E-20 | 82   |
| TcMYB25 | AtMYB109  | 35.85 | 53  | 33  | 1 | 76 | 231 | 56  | 108 | 0.001    | 32.3 |
| TcMYB25 | ATMYB52   | 54.41 | 68  | 31  | 0 | 19 | 222 | 38  | 105 | 3.00E-20 | 80.1 |
| TcMYB25 | ATMYB52   | 32.08 | 53  | 35  | 1 | 76 | 231 | 5   | 57  | 3.00E-04 | 33.5 |
| TcMYB25 | AtMYB64   | 48.53 | 68  | 35  | 0 | 19 | 222 | 138 | 205 | 1.00E-19 | 80.5 |
| TcMYB25 | AtMYB64   | 29.41 | 51  | 35  | 1 | 67 | 216 | 102 | 152 | 1.00E-04 | 35   |
| TcMYB25 | ATMYB69   | 43.27 | 104 | 52  | 2 | 19 | 309 | 52  | 154 | 2.00E-19 | 78.2 |
| TcMYB25 | ATMYB105  | 36.89 | 122 | 60  | 2 | 19 | 333 | 140 | 261 | 4.00E-19 | 78.2 |
| TcMYB25 | AtMYB117  | 50    | 68  | 34  | 0 | 19 | 222 | 131 | 198 | 7.00E-19 | 77.8 |
| TcMYB25 | ATMYB110  | 47.83 | 69  | 36  | 0 | 19 | 225 | 100 | 168 | 3.00E-18 | 75.5 |
| TcMYB25 | AtMYB56   | 47.06 | 68  | 36  | 0 | 19 | 222 | 126 | 193 | 2.00E-17 | 73.6 |
| TcMYB25 | AtMYB22   | 44.44 | 63  | 35  | 0 | 19 | 207 | 86  | 148 | 7.00E-17 | 70.9 |
| TcMYB25 | AtMYB124  | 47.69 | 65  | 34  | 0 | 28 | 222 | 61  | 125 | 7.00E-16 | 69.3 |
| TcMYB25 | ATMYB88   | 47.69 | 65  | 34  | 0 | 28 | 222 | 66  | 130 | 8.00E-16 | 69.3 |
| TcMYB25 | AtMYB89   | 45.07 | 71  | 39  | 1 | 19 | 231 | 89  | 158 | 2.00E-15 | 65.9 |
| TcMYB25 | ATMYB91   | 41.43 | 70  | 41  | 0 | 13 | 222 | 38  | 107 | 5.00E-15 | 66.6 |
| TcMYB26 | ATMYB67   | 65.81 | 117 | 40  | 0 | 4  | 354 | 9   | 125 | 9.00E-58 | 177  |
| TcMYB26 | AtMYB103  | 55.13 | 156 | 69  | 2 | 19 | 483 | 4   | 155 | 3.00E-56 | 176  |
| TcMYB26 | ATMYB15   | 42.55 | 188 | 108 | 1 | 25 | 588 | 6   | 192 | 3.00E-53 | 165  |
| TcMYB26 | ATMYB26   | 63.64 | 121 | 35  | 1 | 19 | 354 | 4   | 124 | 3.00E-53 | 167  |
| TcMYB26 | AtMYB50   | 64.29 | 112 | 40  | 0 | 19 | 354 | 4   | 115 | 4.00E-53 | 166  |
| TcMYB26 | ATMYB61   | 63.39 | 112 | 41  | 0 | 19 | 354 | 4   | 115 | 4.00E-52 | 165  |
| TcMYB26 | AtMYB41   | 53.25 | 154 | 70  | 2 | 25 | 480 | 6   | 157 | 5.00E-52 | 162  |
| TcMYB26 | ATMYB86   | 64.29 | 112 | 40  | 0 | 19 | 354 | 4   | 115 | 5.00E-52 | 164  |
| TcMYB26 | ATMYB72   | 50.3  | 165 | 82  | 1 | 25 | 519 | 8   | 170 | 7.00E-52 | 162  |
| TcMYB26 | AtMYB107  | 62.73 | 110 | 41  | 0 | 25 | 354 | 6   | 115 | 1.00E-51 | 162  |
| TcMYB26 | ATMYB13   | 42    | 200 | 101 | 3 | 25 | 579 | 6   | 205 | 2.00E-51 | 159  |
| TcMYB26 | ATMYB58   | 65.45 | 110 | 38  | 0 | 25 | 354 | 8   | 117 | 2.00E-51 | 160  |
| TcMYB26 | ATMYB63   | 53.52 | 142 | 63  | 1 | 25 | 441 | 8   | 149 | 7.00E-51 | 159  |
| TcMYB26 | ATMYB16   | 62.73 | 110 | 41  | 0 | 25 | 354 | 6   | 115 | 8.00E-51 | 160  |
| TcMYB26 | ATMYB106  | 62.73 | 110 | 41  | 0 | 25 | 354 | 49  | 158 | 9.00E-51 | 162  |
| TcMYB26 | ATMYB102  | 62.73 | 110 | 41  | 0 | 25 | 354 | 6   | 115 | 1.00E-50 | 160  |
| TcMYB26 | ATMYB96   | 44.26 | 183 | 80  | 3 | 25 | 507 | 6   | 188 | 2.00E-50 | 160  |
| TcMYB26 | AtMYB74   | 63.96 | 111 | 39  | 1 | 25 | 354 | 6   | 116 | 2.00E-50 | 159  |
| TcMYB26 | ATMYB3    | 61.82 | 110 | 42  | 0 | 25 | 354 | 6   | 115 | 3.00E-50 | 157  |
| TcMYB26 | ATMYB30   | 42.86 | 196 | 94  | 2 | 25 | 558 | 6   | 201 | 4.00E-50 | 158  |
| TcMYB26 | ATMYB14   | 60.5  | 119 | 41  | 1 | 25 | 363 | 6   | 124 | 5.00E-50 | 156  |
| TcMYB26 | ATMYB55   | 58.87 | 124 | 39  | 1 | 19 | 354 | 4   | 127 | 6.00E-50 | 159  |

|         |           |       |     |     |   |    |     |    |     |          |     |
|---------|-----------|-------|-----|-----|---|----|-----|----|-----|----------|-----|
| TcMYB26 | ATMYB34   | 60.91 | 110 | 43  | 0 | 25 | 354 | 6  | 115 | 6.00E-50 | 157 |
| TcMYB26 | ATMYB80   | 60.18 | 113 | 45  | 0 | 25 | 363 | 6  | 118 | 1.00E-49 | 157 |
| TcMYB26 | AtMYB9    | 61.82 | 110 | 42  | 0 | 25 | 354 | 6  | 115 | 2.00E-49 | 157 |
| TcMYB26 | AtMYB83   | 51.37 | 146 | 69  | 1 | 31 | 462 | 26 | 171 | 3.00E-49 | 157 |
| TcMYB26 | AtMYB93   | 61.82 | 110 | 42  | 0 | 25 | 354 | 6  | 115 | 3.00E-49 | 157 |
| TcMYB26 | AtMYB49   | 65.38 | 104 | 36  | 0 | 43 | 354 | 12 | 115 | 6.00E-49 | 155 |
| TcMYB26 | ATMYB94   | 60.91 | 110 | 43  | 0 | 25 | 354 | 6  | 115 | 9.00E-49 | 155 |
| TcMYB26 | MYB7      | 59.09 | 110 | 45  | 0 | 25 | 354 | 6  | 115 | 1.00E-48 | 153 |
| TcMYB26 | AtMYB32   | 60    | 110 | 44  | 0 | 25 | 354 | 6  | 115 | 3.00E-48 | 152 |
| TcMYB26 | AtMYB6    | 58.18 | 110 | 46  | 0 | 25 | 354 | 6  | 115 | 3.00E-48 | 151 |
| TcMYB26 | MYB8      | 46.95 | 164 | 82  | 3 | 25 | 501 | 6  | 166 | 3.00E-48 | 150 |
| TcMYB26 | AtMYB51   | 58.18 | 110 | 46  | 0 | 25 | 354 | 7  | 116 | 4.00E-48 | 154 |
| TcMYB26 | ATMYB4    | 59.09 | 110 | 45  | 0 | 25 | 354 | 6  | 115 | 4.00E-48 | 152 |
| TcMYB26 | AtMYB53   | 64.42 | 104 | 37  | 0 | 43 | 354 | 12 | 115 | 4.00E-48 | 153 |
| TcMYB26 | ATMYB111  | 58.47 | 118 | 49  | 0 | 25 | 378 | 6  | 123 | 6.00E-48 | 153 |
| TcMYB26 | ATMYB37   | 57.03 | 128 | 54  | 1 | 25 | 405 | 6  | 133 | 6.00E-48 | 153 |
| TcMYB26 | ATMYB31   | 60.91 | 110 | 43  | 0 | 25 | 354 | 6  | 115 | 6.00E-48 | 153 |
| TcMYB26 | AtMYB19   | 63.55 | 107 | 39  | 0 | 34 | 354 | 9  | 115 | 7.00E-48 | 151 |
| TcMYB26 | ATMYB95   | 63.46 | 104 | 38  | 0 | 43 | 354 | 12 | 115 | 8.00E-48 | 151 |
| TcMYB26 | ATMYB28   | 59.09 | 110 | 45  | 0 | 25 | 354 | 6  | 115 | 1.00E-47 | 153 |
| TcMYB26 | ATMYB29   | 59.63 | 109 | 44  | 0 | 25 | 351 | 6  | 114 | 2.00E-47 | 152 |
| TcMYB26 | AtMYB60   | 59.09 | 110 | 45  | 0 | 25 | 354 | 6  | 115 | 2.00E-47 | 150 |
| TcMYB26 | ATMYB46   | 52.63 | 133 | 59  | 1 | 37 | 423 | 16 | 148 | 2.00E-47 | 150 |
| TcMYB26 | AtMYB17   | 59.09 | 110 | 45  | 0 | 25 | 354 | 6  | 115 | 3.00E-47 | 150 |
| TcMYB26 | ATMYB92   | 61.54 | 104 | 40  | 0 | 43 | 354 | 12 | 115 | 5.00E-47 | 150 |
| TcMYB26 | ATMYB5    | 58.18 | 110 | 46  | 0 | 25 | 354 | 17 | 126 | 7.00E-47 | 148 |
| TcMYB26 | ATMYB122  | 56.88 | 109 | 47  | 0 | 25 | 351 | 6  | 114 | 7.00E-47 | 150 |
| TcMYB26 | AtMYB10   | 57.02 | 121 | 52  | 1 | 25 | 387 | 8  | 127 | 8.00E-47 | 147 |
| TcMYB26 | ATMYB12   | 58.77 | 114 | 47  | 0 | 25 | 366 | 6  | 119 | 9.00E-47 | 151 |
| TcMYB26 | ATMYB38   | 60.36 | 111 | 43  | 1 | 25 | 354 | 6  | 116 | 9.00E-47 | 149 |
| TcMYB26 | ATMYB35   | 56.36 | 110 | 48  | 0 | 25 | 354 | 6  | 115 | 2.00E-46 | 149 |
| TcMYB26 | AtMYB76   | 57.8  | 109 | 46  | 0 | 28 | 354 | 7  | 115 | 3.00E-46 | 149 |
| TcMYB26 | ATMYB84   | 61.26 | 111 | 42  | 1 | 25 | 354 | 6  | 116 | 5.00E-46 | 147 |
| TcMYB26 | ATMYB11   | 57.02 | 114 | 49  | 0 | 25 | 366 | 6  | 119 | 1.00E-45 | 147 |
| TcMYB26 | AtMYB36   | 58.62 | 116 | 47  | 1 | 25 | 369 | 6  | 121 | 2.00E-45 | 147 |
| TcMYB26 | AtMYB18   | 63.11 | 103 | 38  | 0 | 46 | 354 | 11 | 113 | 2.00E-45 | 145 |
| TcMYB26 | ATMYB66   | 56.19 | 105 | 46  | 0 | 46 | 360 | 17 | 121 | 2.00E-45 | 142 |
| TcMYB26 | ATMYB123  | 60.75 | 107 | 42  | 0 | 34 | 354 | 11 | 117 | 3.00E-45 | 144 |
| TcMYB26 | AtMYB82   | 57.94 | 107 | 45  | 0 | 34 | 354 | 9  | 115 | 3.00E-45 | 142 |
| TcMYB26 | ATMYB23   | 40.64 | 187 | 111 | 2 | 13 | 573 | 2  | 158 | 6.00E-45 | 142 |
| TcMYB26 | AtMYB45   | 57.01 | 107 | 46  | 0 | 31 | 351 | 14 | 120 | 6.00E-45 | 143 |
| TcMYB26 | AtMYB42   | 58.18 | 110 | 46  | 0 | 25 | 354 | 6  | 115 | 8.00E-45 | 144 |
| TcMYB26 | ATMYB87   | 58.56 | 111 | 45  | 1 | 25 | 354 | 6  | 116 | 9.00E-45 | 144 |
| TcMYB26 | ATMYB68   | 60.36 | 111 | 43  | 1 | 25 | 354 | 6  | 116 | 2.00E-44 | 145 |
| TcMYB26 | AtMYB47   | 59.62 | 104 | 42  | 0 | 43 | 354 | 12 | 115 | 4.00E-44 | 141 |
| TcMYB26 | AtMYB85   | 56.36 | 110 | 48  | 0 | 25 | 354 | 6  | 115 | 8.00E-44 | 140 |
| TcMYB26 | AtMYB20   | 56.36 | 110 | 48  | 0 | 25 | 354 | 6  | 115 | 8.00E-44 | 141 |
| TcMYB26 | AtMYB43   | 57.27 | 110 | 47  | 0 | 25 | 354 | 6  | 115 | 8.00E-44 | 142 |
| TcMYB26 | AtMYB112  | 44.38 | 169 | 78  | 3 | 43 | 501 | 32 | 200 | 7.00E-43 | 137 |
| TcMYB26 | ATMYB0    | 54.37 | 103 | 47  | 0 | 46 | 354 | 15 | 117 | 1.00E-42 | 136 |
| TcMYB26 | AtMYB24   | 53.39 | 118 | 52  | 1 | 43 | 387 | 17 | 134 | 2.00E-42 | 135 |
| TcMYB26 | AtMYB40   | 54.55 | 110 | 50  | 0 | 25 | 354 | 6  | 115 | 2.00E-42 | 137 |
| TcMYB26 | AtMYB108  | 43.29 | 164 | 92  | 1 | 43 | 531 | 19 | 182 | 3.00E-42 | 138 |
| TcMYB26 | ATMYB3    | 58.25 | 103 | 43  | 0 | 43 | 351 | 20 | 122 | 5.00E-42 | 135 |
| TcMYB26 | ATMYB57   | 54.37 | 103 | 47  | 0 | 43 | 351 | 25 | 127 | 3.00E-41 | 132 |
| TcMYB26 | ATMYB65   | 54.46 | 112 | 50  | 1 | 22 | 354 | 33 | 144 | 3.00E-41 | 139 |
| TcMYB26 | ATMYB33   | 57.14 | 105 | 45  | 0 | 40 | 354 | 31 | 135 | 4.00E-41 | 139 |
| TcMYB26 | AtMYB81   | 53.77 | 106 | 49  | 0 | 34 | 351 | 17 | 122 | 5.00E-41 | 137 |
| TcMYB26 | ATMYB121  | 47.01 | 134 | 69  | 2 | 7  | 402 | 18 | 148 | 2.00E-40 | 132 |
| TcMYB26 | AtMYB114  | 49.54 | 109 | 55  | 0 | 31 | 357 | 4  | 112 | 6.00E-40 | 127 |
| TcMYB26 | ATMYB101  | 52.83 | 106 | 50  | 0 | 37 | 354 | 16 | 121 | 6.00E-40 | 135 |
| TcMYB26 | AtMYB79   | 56.31 | 103 | 45  | 0 | 46 | 354 | 7  | 109 | 1.00E-39 | 130 |
| TcMYB26 | ATMYB99   | 48.72 | 117 | 53  | 1 | 25 | 354 | 7  | 123 | 1.00E-39 | 129 |
| TcMYB26 | ATMYB71   | 55.34 | 103 | 46  | 0 | 46 | 354 | 19 | 121 | 1.00E-38 | 127 |
| TcMYB26 | AtMYB97   | 54.37 | 103 | 47  | 0 | 43 | 351 | 19 | 121 | 2.00E-38 | 129 |
| TcMYB26 | ATMYB75   | 48.62 | 109 | 56  | 0 | 31 | 357 | 4  | 112 | 6.00E-38 | 125 |
| TcMYB26 | ATMYB2    | 40.91 | 154 | 87  | 3 | 43 | 492 | 20 | 167 | 8.00E-38 | 125 |
| TcMYB26 | ATMYB90   | 48.62 | 109 | 56  | 0 | 31 | 357 | 4  | 112 | 3.00E-37 | 123 |
| TcMYB26 | ATMYB120  | 53.4  | 103 | 48  | 0 | 43 | 351 | 26 | 128 | 3.00E-37 | 128 |
| TcMYB26 | AtMYB113  | 46.79 | 109 | 58  | 0 | 31 | 357 | 4  | 112 | 7.00E-37 | 122 |
| TcMYB26 | AtMYB27   | 51.4  | 107 | 52  | 0 | 34 | 354 | 6  | 112 | 1.00E-36 | 121 |
| TcMYB26 | ATMYB78   | 50.43 | 117 | 44  | 1 | 43 | 351 | 26 | 142 | 2.00E-36 | 122 |
| TcMYB26 | AtMYB116  | 50.49 | 103 | 51  | 0 | 46 | 354 | 19 | 121 | 9.00E-36 | 120 |
| TcMYB26 | AtMYB62   | 50.96 | 104 | 51  | 0 | 43 | 354 | 19 | 122 | 9.00E-36 | 120 |
| TcMYB26 | ATMYB59-3 | 34.43 | 183 | 120 | 3 | 46 | 594 | 9  | 171 | 1.00E-35 | 119 |
| TcMYB26 | ATMYB48   | 46.6  | 103 | 55  | 0 | 46 | 354 | 8  | 110 | 7.00E-35 | 117 |
| TcMYB26 | AtMYB104  | 42.2  | 109 | 63  | 0 | 34 | 360 | 13 | 121 | 2.00E-32 | 113 |
| TcMYB26 | ATMYB105  | 44.62 | 130 | 69  | 3 | 16 | 396 | 93 | 218 | 4.00E-30 | 106 |
| TcMYB26 | ATMYB119  | 39.1  | 133 | 80  | 2 | 7  | 402 | 91 | 221 | 5.00E-29 | 105 |
| TcMYB26 | ATMYB73   | 50    | 102 | 51  | 1 | 49 | 354 | 13 | 113 | 9.00E-29 | 102 |

|         |           |       |     |     |   |     |     |     |     |          |      |
|---------|-----------|-------|-----|-----|---|-----|-----|-----|-----|----------|------|
| TcMYB26 | AtMYB64   | 39.84 | 128 | 76  | 3 | 49  | 429 | 105 | 224 | 2.00E-28 | 103  |
| TcMYB26 | AtMYB64   | 30.77 | 52  | 33  | 2 | 202 | 348 | 103 | 152 | 5.00E-04 | 32.7 |
| TcMYB26 | AtMYB109  | 45.99 | 137 | 66  | 4 | 37  | 423 | 52  | 186 | 2.00E-28 | 102  |
| TcMYB26 | ATMYB52   | 39.69 | 131 | 69  | 2 | 49  | 411 | 5   | 134 | 4.00E-28 | 99.8 |
| TcMYB26 | ATMYB44   | 46.36 | 110 | 55  | 2 | 49  | 366 | 6   | 110 | 4.00E-28 | 100  |
| TcMYB26 | AtMYB115  | 41.51 | 106 | 62  | 1 | 34  | 351 | 153 | 257 | 4.00E-28 | 101  |
| TcMYB26 | AtMYB1    | 35.88 | 170 | 99  | 2 | 49  | 528 | 55  | 223 | 4.00E-28 | 102  |
| TcMYB26 | ATMYB69   | 42.28 | 123 | 69  | 3 | 34  | 396 | 14  | 134 | 7.00E-28 | 99   |
| TcMYB26 | AtMYB70   | 47.62 | 105 | 55  | 1 | 49  | 363 | 13  | 116 | 1.00E-27 | 99.8 |
| TcMYB26 | AtMYB117  | 47.06 | 102 | 54  | 1 | 49  | 354 | 98  | 198 | 2.00E-27 | 99.8 |
| TcMYB26 | ATMYB54   | 47.92 | 96  | 50  | 1 | 49  | 336 | 6   | 100 | 3.00E-27 | 97.1 |
| TcMYB26 | ATMYB25   | 48.04 | 102 | 53  | 1 | 49  | 354 | 50  | 150 | 5.00E-27 | 99   |
| TcMYB26 | ATMYB77   | 36.05 | 147 | 94  | 1 | 49  | 489 | 6   | 151 | 2.00E-26 | 96.3 |
| TcMYB26 | ATMYB118  | 38.26 | 115 | 71  | 1 | 13  | 357 | 177 | 290 | 6.00E-26 | 96.7 |
| TcMYB26 | ATMYB110  | 41.74 | 115 | 67  | 2 | 10  | 354 | 59  | 167 | 3.00E-25 | 93.2 |
| TcMYB26 | AtMYB56   | 44    | 100 | 56  | 1 | 37  | 336 | 89  | 187 | 4.00E-25 | 93.2 |
| TcMYB26 | AtMYB98   | 40.19 | 107 | 64  | 1 | 34  | 354 | 212 | 317 | 1.00E-24 | 93.2 |
| TcMYB26 | AtMYB89   | 37.17 | 113 | 71  | 1 | 13  | 351 | 44  | 155 | 2.00E-22 | 83.2 |
| TcMYB26 | AtMYB100  | 38.1  | 105 | 62  | 2 | 58  | 363 | 29  | 132 | 3.00E-22 | 84   |
| TcMYB26 | ATMYB91   | 31.85 | 157 | 98  | 2 | 46  | 489 | 3   | 159 | 6.00E-21 | 82   |
| TcMYB26 | AtMYB22   | 33.04 | 112 | 72  | 2 | 34  | 360 | 49  | 158 | 7.00E-18 | 72.4 |
| TcMYB26 | ATMYB88   | 37.37 | 99  | 62  | 1 | 58  | 354 | 33  | 130 | 9.00E-18 | 73.6 |
| TcMYB26 | AtMYB124  | 36.36 | 99  | 63  | 1 | 58  | 354 | 28  | 125 | 2.00E-17 | 72.4 |
| TcMYB27 | AtMYB56   | 44.92 | 236 | 110 | 4 | 37  | 684 | 88  | 322 | 1.00E-58 | 181  |
| TcMYB27 | AtMYB117  | 70.18 | 114 | 33  | 1 | 49  | 387 | 97  | 210 | 1.00E-57 | 179  |
| TcMYB27 | ATMYB105  | 71.68 | 113 | 31  | 1 | 52  | 387 | 107 | 219 | 3.00E-57 | 178  |
| TcMYB27 | ATMYB54   | 60.16 | 128 | 44  | 1 | 43  | 405 | 3   | 130 | 4.00E-53 | 164  |
| TcMYB27 | ATMYB110  | 36.23 | 265 | 130 | 6 | 4   | 681 | 46  | 304 | 1.00E-52 | 165  |
| TcMYB27 | ATMYB69   | 40.51 | 237 | 116 | 5 | 46  | 681 | 17  | 247 | 2.00E-52 | 163  |
| TcMYB27 | ATMYB52   | 66.02 | 103 | 35  | 0 | 43  | 351 | 2   | 104 | 2.00E-51 | 160  |
| TcMYB27 | AtMYB89   | 61.62 | 99  | 38  | 0 | 55  | 351 | 57  | 155 | 3.00E-44 | 140  |
| TcMYB27 | ATMYB44   | 57.89 | 95  | 40  | 0 | 52  | 336 | 6   | 100 | 4.00E-39 | 130  |
| TcMYB27 | ATMYB73   | 55.79 | 95  | 42  | 0 | 52  | 336 | 13  | 107 | 2.00E-38 | 129  |
| TcMYB27 | AtMYB70   | 50.89 | 112 | 55  | 1 | 1   | 336 | 1   | 107 | 3.00E-37 | 125  |
| TcMYB27 | ATMYB77   | 38.1  | 168 | 94  | 2 | 52  | 525 | 6   | 173 | 8.00E-37 | 124  |
| TcMYB27 | AtMYB109  | 44.93 | 138 | 74  | 2 | 52  | 459 | 56  | 193 | 2.00E-36 | 125  |
| TcMYB27 | AtMYB1    | 54.74 | 95  | 43  | 0 | 52  | 336 | 55  | 149 | 9.00E-36 | 123  |
| TcMYB27 | ATMYB25   | 51.58 | 95  | 46  | 0 | 52  | 336 | 50  | 144 | 1.00E-33 | 117  |
| TcMYB27 | ATMYB119  | 39.16 | 143 | 87  | 2 | 4   | 432 | 92  | 220 | 5.00E-31 | 111  |
| TcMYB27 | ATMYB72   | 32.85 | 207 | 119 | 6 | 52  | 612 | 16  | 215 | 2.00E-30 | 107  |
| TcMYB27 | AtMYB64   | 40.16 | 127 | 76  | 1 | 52  | 432 | 105 | 220 | 2.00E-30 | 109  |
| TcMYB27 | ATMYB118  | 45.13 | 113 | 62  | 1 | 52  | 390 | 189 | 299 | 4.00E-30 | 108  |
| TcMYB27 | AtMYB115  | 33.52 | 176 | 101 | 2 | 31  | 510 | 151 | 326 | 6.00E-30 | 107  |
| TcMYB27 | ATMYB66   | 36.94 | 157 | 98  | 3 | 52  | 519 | 18  | 157 | 2.00E-29 | 102  |
| TcMYB27 | ATMYB63   | 34.97 | 183 | 94  | 4 | 52  | 525 | 16  | 197 | 2.00E-29 | 104  |
| TcMYB27 | ATMYB23   | 30.57 | 193 | 117 | 2 | 52  | 579 | 14  | 206 | 2.00E-29 | 102  |
| TcMYB27 | AtMYB82   | 43.55 | 124 | 69  | 2 | 52  | 420 | 14  | 126 | 3.00E-29 | 102  |
| TcMYB27 | AtMYB10   | 40.46 | 131 | 76  | 2 | 52  | 438 | 16  | 145 | 4.00E-29 | 102  |
| TcMYB27 | ATMYB35   | 48.96 | 96  | 48  | 1 | 52  | 336 | 14  | 109 | 4.00E-29 | 104  |
| TcMYB27 | AtMYB100  | 48.39 | 93  | 48  | 0 | 58  | 336 | 28  | 120 | 6.00E-29 | 102  |
| TcMYB27 | AtMYB36   | 39.33 | 150 | 89  | 3 | 52  | 495 | 14  | 162 | 7.00E-29 | 103  |
| TcMYB27 | AtMYB19   | 43.94 | 132 | 72  | 4 | 1   | 390 | 1   | 126 | 9.00E-29 | 102  |
| TcMYB27 | AtMYB45   | 36    | 175 | 111 | 5 | 52  | 573 | 20  | 170 | 2.00E-28 | 101  |
| TcMYB27 | ATMYB121  | 36.67 | 150 | 93  | 2 | 34  | 477 | 23  | 171 | 2.00E-28 | 101  |
| TcMYB27 | AtMYB27   | 45.37 | 108 | 57  | 2 | 52  | 369 | 11  | 117 | 3.00E-28 | 100  |
| TcMYB27 | ATMYB84   | 40.58 | 138 | 80  | 4 | 52  | 459 | 14  | 144 | 4.00E-28 | 101  |
| TcMYB27 | ATMYB15   | 35.17 | 145 | 93  | 1 | 52  | 483 | 14  | 158 | 5.00E-28 | 100  |
| TcMYB27 | AtMYB114  | 44.95 | 109 | 59  | 1 | 37  | 360 | 5   | 113 | 5.00E-28 | 97.1 |
| TcMYB27 | ATMYB80   | 47.92 | 96  | 49  | 1 | 52  | 336 | 14  | 109 | 9.00E-28 | 100  |
| TcMYB27 | ATMYB13   | 31    | 200 | 133 | 5 | 52  | 636 | 14  | 199 | 1.00E-27 | 99   |
| TcMYB27 | ATMYB68   | 40.58 | 138 | 80  | 4 | 52  | 459 | 14  | 144 | 1.00E-27 | 101  |
| TcMYB27 | ATMYB67   | 35.44 | 158 | 100 | 2 | 52  | 519 | 24  | 180 | 1.00E-27 | 100  |
| TcMYB27 | ATMYB0    | 45.54 | 101 | 54  | 1 | 52  | 351 | 16  | 116 | 2.00E-27 | 98.2 |
| TcMYB27 | ATMYB123  | 37.6  | 125 | 77  | 2 | 52  | 423 | 16  | 138 | 2.00E-27 | 98.6 |
| TcMYB27 | ATMYB46   | 39.72 | 141 | 83  | 3 | 34  | 450 | 14  | 152 | 2.00E-27 | 99   |
| TcMYB27 | AtMYB98   | 45.71 | 105 | 57  | 1 | 52  | 366 | 217 | 319 | 3.00E-27 | 100  |
| TcMYB27 | AtMYB18   | 45.83 | 96  | 51  | 1 | 52  | 336 | 12  | 107 | 3.00E-27 | 98.6 |
| TcMYB27 | ATMYB14   | 37.59 | 141 | 83  | 3 | 52  | 459 | 14  | 152 | 4.00E-27 | 97.8 |
| TcMYB27 | ATMYB58   | 36.6  | 153 | 94  | 3 | 52  | 501 | 16  | 168 | 4.00E-27 | 98.2 |
| TcMYB27 | ATMYB4    | 30.92 | 207 | 141 | 7 | 52  | 666 | 14  | 197 | 1.00E-26 | 97.1 |
| TcMYB27 | ATMYB122  | 34.55 | 165 | 105 | 2 | 52  | 537 | 14  | 178 | 3.00E-26 | 97.1 |
| TcMYB27 | ATMYB75   | 44.95 | 109 | 59  | 1 | 37  | 360 | 5   | 113 | 4.00E-26 | 95.1 |
| TcMYB27 | ATMYB37   | 32.23 | 211 | 124 | 6 | 52  | 627 | 14  | 223 | 4.00E-26 | 96.7 |
| TcMYB27 | ATMYB59-3 | 38.06 | 134 | 81  | 3 | 52  | 447 | 10  | 132 | 4.00E-26 | 94.7 |
| TcMYB27 | ATMYB48   | 34.81 | 158 | 101 | 3 | 52  | 519 | 9   | 154 | 4.00E-26 | 95.1 |
| TcMYB27 | AtMYB112  | 41.38 | 116 | 67  | 1 | 52  | 396 | 34  | 149 | 6.00E-26 | 94.4 |
| TcMYB27 | AtMYB41   | 46.39 | 97  | 50  | 2 | 52  | 336 | 14  | 109 | 7.00E-26 | 95.1 |
| TcMYB27 | ATMYB88   | 27.31 | 216 | 139 | 3 | 61  | 654 | 33  | 248 | 7.00E-26 | 97.4 |
| TcMYB27 | ATMYB88   | 33.9  | 59  | 39  | 1 | 52  | 228 | 82  | 139 | 2.00E-05 | 37   |
| TcMYB27 | AtMYB83   | 30.57 | 193 | 121 | 4 | 52  | 591 | 32  | 224 | 8.00E-26 | 95.9 |

|         |           |       |     |     |   |     |      |     |     |           |      |
|---------|-----------|-------|-----|-----|---|-----|------|-----|-----|-----------|------|
| TcMYB27 | AtMYB124  | 31.29 | 163 | 103 | 3 | 61  | 522  | 28  | 187 | 1.00E-25  | 96.3 |
| TcMYB27 | AtMYB124  | 28.79 | 66  | 47  | 1 | 52  | 249  | 77  | 141 | 8.00E-05  | 35.4 |
| TcMYB27 | ATMYB71   | 32.58 | 178 | 118 | 4 | 52  | 579  | 20  | 192 | 1.00E-25  | 94   |
| TcMYB27 | AtMYB74   | 44.79 | 96  | 52  | 1 | 52  | 336  | 15  | 110 | 2.00E-25  | 94.7 |
| TcMYB27 | AtMYB104  | 39.62 | 106 | 63  | 1 | 22  | 336  | 8   | 113 | 2.00E-25  | 95.5 |
| TcMYB27 | AtMYB43   | 35.76 | 165 | 86  | 5 | 52  | 486  | 14  | 177 | 2.00E-25  | 94.7 |
| TcMYB27 | ATMYB87   | 36.05 | 147 | 92  | 4 | 52  | 486  | 14  | 155 | 2.00E-25  | 94.4 |
| TcMYB27 | ATMYB90   | 42.5  | 120 | 67  | 2 | 37  | 390  | 5   | 124 | 2.00E-25  | 93.2 |
| TcMYB27 | AtMYB53   | 40.74 | 135 | 78  | 3 | 52  | 450  | 14  | 142 | 2.00E-25  | 94.4 |
| TcMYB27 | ATMYB34   | 46.88 | 96  | 50  | 1 | 52  | 336  | 14  | 109 | 2.00E-25  | 94   |
| TcMYB27 | AtMYB51   | 45.83 | 96  | 51  | 1 | 52  | 336  | 15  | 110 | 3.00E-25  | 94.4 |
| TcMYB27 | ATMYB38   | 39.72 | 141 | 83  | 4 | 52  | 468  | 14  | 149 | 9.00E-25  | 92.4 |
| TcMYB27 | ATMYB92   | 47.42 | 97  | 49  | 2 | 52  | 336  | 14  | 109 | 1.00E-24  | 92.8 |
| TcMYB27 | ATMYB2    | 46.32 | 95  | 50  | 1 | 52  | 333  | 22  | 116 | 1.00E-24  | 91.7 |
| TcMYB27 | AtMYB79   | 36.23 | 138 | 86  | 3 | 52  | 459  | 8   | 143 | 1.00E-24  | 91.3 |
| TcMYB27 | AtMYB6    | 35.25 | 139 | 88  | 3 | 52  | 462  | 14  | 147 | 2.00E-24  | 90.1 |
| TcMYB27 | AtMYB49   | 44.79 | 96  | 52  | 1 | 52  | 336  | 14  | 109 | 2.00E-24  | 91.7 |
| TcMYB27 | AtMYB22   | 40.52 | 116 | 64  | 2 | 4   | 336  | 33  | 147 | 3.00E-24  | 90.1 |
| TcMYB27 | ATMYB3    | 44.33 | 97  | 52  | 2 | 52  | 336  | 14  | 109 | 3.00E-24  | 90.1 |
| TcMYB27 | AtMYB62   | 29.55 | 247 | 142 | 8 | 4   | 648  | 12  | 250 | 4.00E-24  | 90.5 |
| TcMYB27 | ATMYB61   | 33.95 | 162 | 91  | 4 | 52  | 489  | 14  | 174 | 4.00E-24  | 91.7 |
| TcMYB27 | AtMYB103  | 27.96 | 211 | 137 | 3 | 52  | 639  | 14  | 224 | 4.00E-24  | 91.7 |
| TcMYB27 | AtMYB50   | 37.86 | 140 | 74  | 4 | 52  | 432  | 14  | 149 | 4.00E-24  | 90.9 |
| TcMYB27 | AtMYB32   | 43.75 | 96  | 53  | 1 | 52  | 336  | 14  | 109 | 4.00E-24  | 90.1 |
| TcMYB27 | ATMYB55   | 30.85 | 188 | 100 | 5 | 52  | 525  | 14  | 196 | 4.00E-24  | 91.3 |
| TcMYB27 | ATMYB57   | 31.98 | 172 | 115 | 5 | 52  | 561  | 27  | 191 | 5.00E-24  | 88.6 |
| TcMYB27 | ATMYB94   | 30.81 | 198 | 131 | 4 | 52  | 627  | 14  | 196 | 5.00E-24  | 90.9 |
| TcMYB27 | AtMYB113  | 42.86 | 105 | 58  | 2 | 52  | 360  | 10  | 114 | 5.00E-24  | 89.4 |
| TcMYB27 | ATMYB26   | 32.94 | 170 | 93  | 4 | 52  | 498  | 14  | 180 | 5.00E-24  | 91.3 |
| TcMYB27 | ATMYB86   | 44.33 | 97  | 52  | 2 | 52  | 336  | 14  | 109 | 6.00E-24  | 90.9 |
| TcMYB27 | ATMYB5    | 42.71 | 96  | 54  | 1 | 52  | 336  | 25  | 120 | 8.00E-24  | 89   |
| TcMYB27 | AtMYB76   | 33.51 | 194 | 109 | 5 | 52  | 573  | 14  | 203 | 1.00E-23  | 90.1 |
| TcMYB27 | AtMYB107  | 43.75 | 96  | 53  | 1 | 52  | 336  | 14  | 109 | 1.00E-23  | 89.7 |
| TcMYB27 | AtMYB40   | 44.33 | 97  | 52  | 2 | 52  | 336  | 14  | 109 | 1.00E-23  | 88.6 |
| TcMYB27 | AtMYB9    | 43.75 | 96  | 53  | 1 | 52  | 336  | 14  | 109 | 2.00E-23  | 89.4 |
| TcMYB27 | MYB8      | 39.58 | 96  | 57  | 1 | 52  | 336  | 14  | 109 | 2.00E-23  | 87   |
| TcMYB27 | ATMYB95   | 40.62 | 96  | 56  | 1 | 52  | 336  | 14  | 109 | 2.00E-23  | 88.2 |
| TcMYB27 | ATMYB102  | 43.75 | 96  | 53  | 1 | 52  | 336  | 14  | 109 | 3.00E-23  | 89   |
| TcMYB27 | AtMYB108  | 40.17 | 117 | 68  | 2 | 52  | 396  | 21  | 136 | 3.00E-23  | 88.6 |
| TcMYB27 | MYB7      | 41.24 | 97  | 55  | 2 | 52  | 336  | 14  | 109 | 6.00E-23  | 87   |
| TcMYB27 | ATMYB106  | 30.16 | 189 | 112 | 5 | 52  | 558  | 57  | 245 | 6.00E-23  | 88.6 |
| TcMYB27 | ATMYB28   | 35.17 | 145 | 82  | 2 | 52  | 450  | 14  | 158 | 9.00E-23  | 87.8 |
| TcMYB27 | ATMYB16   | 43.3  | 97  | 53  | 2 | 52  | 336  | 14  | 109 | 1.00E-22  | 87   |
| TcMYB27 | AtMYB93   | 43.75 | 96  | 53  | 1 | 52  | 336  | 14  | 109 | 1.00E-22  | 87.4 |
| TcMYB27 | ATMYB65   | 41.67 | 96  | 55  | 1 | 52  | 336  | 43  | 138 | 2.00E-22  | 87.8 |
| TcMYB27 | AtMYB97   | 35.43 | 127 | 75  | 2 | 52  | 411  | 21  | 147 | 3.00E-22  | 86.7 |
| TcMYB27 | ATMYB30   | 34.78 | 138 | 89  | 2 | 52  | 462  | 14  | 140 | 3.00E-22  | 85.9 |
| TcMYB27 | AtMYB60   | 32.24 | 152 | 97  | 3 | 52  | 489  | 14  | 154 | 3.00E-22  | 85.1 |
| TcMYB27 | AtMYB47   | 37.5  | 96  | 59  | 1 | 52  | 336  | 14  | 109 | 4.00E-22  | 84.7 |
| TcMYB27 | ATMYB96   | 35.46 | 141 | 87  | 3 | 52  | 462  | 14  | 143 | 4.00E-22  | 85.9 |
| TcMYB27 | ATMYB29   | 44.79 | 96  | 52  | 1 | 52  | 336  | 14  | 109 | 5.00E-22  | 85.5 |
| TcMYB27 | AtMYB116  | 30.22 | 225 | 154 | 7 | 4   | 669  | 8   | 201 | 5.00E-22  | 84.7 |
| TcMYB27 | AtMYB85   | 32.07 | 184 | 121 | 4 | 52  | 591  | 14  | 194 | 5.00E-22  | 84.3 |
| TcMYB27 | ATMYB101  | 30.49 | 164 | 106 | 3 | 52  | 519  | 20  | 182 | 6.00E-22  | 86.3 |
| TcMYB27 | AtMYB24   | 30.94 | 181 | 106 | 5 | 52  | 537  | 19  | 199 | 1.00E-21  | 82.4 |
| TcMYB27 | AtMYB81   | 41.67 | 96  | 55  | 1 | 52  | 336  | 22  | 117 | 2.00E-21  | 84.7 |
| TcMYB27 | AtMYB42   | 43.3  | 97  | 53  | 2 | 52  | 336  | 14  | 109 | 3.00E-21  | 82.8 |
| TcMYB27 | ATMYB31   | 34.51 | 142 | 89  | 3 | 52  | 465  | 14  | 144 | 3.00E-21  | 83.2 |
| TcMYB27 | AtMYB20   | 29.28 | 222 | 127 | 5 | 52  | 627  | 14  | 234 | 5.00E-21  | 82   |
| TcMYB27 | ATMYB3    | 33.59 | 128 | 84  | 1 | 52  | 432  | 22  | 149 | 7.00E-21  | 80.5 |
| TcMYB27 | ATMYB33   | 40.62 | 96  | 56  | 1 | 52  | 336  | 34  | 129 | 7.00E-21  | 83.2 |
| TcMYB27 | AtMYB17   | 41.24 | 97  | 55  | 2 | 52  | 336  | 14  | 109 | 2.00E-20  | 80.5 |
| TcMYB27 | ATMYB111  | 38.54 | 96  | 58  | 1 | 52  | 336  | 14  | 109 | 2.00E-20  | 80.9 |
| TcMYB27 | ATMYB78   | 33.14 | 175 | 87  | 6 | 52  | 486  | 28  | 200 | 1.00E-19  | 78.6 |
| TcMYB27 | ATMYB120  | 26.67 | 180 | 115 | 2 | 52  | 540  | 28  | 207 | 2.00E-19  | 79.3 |
| TcMYB27 | ATMYB11   | 37.5  | 96  | 59  | 1 | 52  | 336  | 14  | 109 | 2.00E-19  | 78.2 |
| TcMYB27 | ATMYB12   | 37.5  | 96  | 59  | 1 | 52  | 336  | 14  | 109 | 3.00E-19  | 78.2 |
| TcMYB27 | ATMYB99   | 34.31 | 137 | 82  | 4 | 52  | 438  | 15  | 149 | 4.00E-19  | 76.3 |
| TcMYB27 | ATMYB91   | 28.75 | 160 | 109 | 3 | 52  | 516  | 4   | 154 | 6.00E-19  | 77   |
| TcMYB28 | ATMYB91   | 45.41 | 392 | 211 | 9 | 1   | 1167 | 1   | 358 | 3.00E-109 | 319  |
| TcMYB28 | ATMYB48   | 28.87 | 239 | 141 | 6 | 19  | 648  | 12  | 242 | 7.00E-29  | 106  |
| TcMYB28 | AtMYB82   | 41.23 | 114 | 67  | 1 | 7   | 348  | 13  | 124 | 1.00E-28  | 104  |
| TcMYB28 | AtMYB97   | 29.23 | 284 | 187 | 5 | 19  | 828  | 24  | 278 | 2.00E-28  | 108  |
| TcMYB28 | ATMYB120  | 31.09 | 238 | 145 | 4 | 19  | 675  | 31  | 260 | 2.00E-28  | 109  |
| TcMYB28 | ATMYB120  | 29.05 | 148 | 92  | 4 | 322 | 726  | 229 | 375 | 8.00E-06  | 40   |
| TcMYB28 | ATMYB59-3 | 42.24 | 116 | 66  | 2 | 19  | 363  | 13  | 126 | 3.00E-28  | 104  |
| TcMYB28 | ATMYB57   | 38.46 | 130 | 71  | 2 | 19  | 381  | 30  | 157 | 1.00E-27  | 102  |
| TcMYB28 | AtMYB79   | 36.17 | 141 | 90  | 2 | 19  | 441  | 11  | 145 | 5.00E-27  | 101  |
| TcMYB28 | AtMYB116  | 41.96 | 112 | 65  | 1 | 19  | 354  | 23  | 132 | 8.00E-27  | 101  |
| TcMYB28 | ATMYB96   | 28.24 | 255 | 175 | 6 | 19  | 759  | 17  | 264 | 1.00E-26  | 102  |

|         |          |       |     |     |    |     |     |     |     |          |      |
|---------|----------|-------|-----|-----|----|-----|-----|-----|-----|----------|------|
| TcMYB28 | ATMYB63  | 38.97 | 136 | 77  | 4  | 7   | 396 | 15  | 148 | 2.00E-26 | 100  |
| TcMYB28 | AtMYB76  | 36.25 | 160 | 102 | 2  | 19  | 498 | 17  | 172 | 3.00E-26 | 101  |
| TcMYB28 | ATMYB101 | 42.72 | 103 | 59  | 1  | 19  | 327 | 23  | 123 | 3.00E-26 | 102  |
| TcMYB28 | AtMYB19  | 39.52 | 124 | 72  | 2  | 4   | 366 | 9   | 130 | 4.00E-26 | 99.4 |
| TcMYB28 | AtMYB51  | 30.04 | 273 | 181 | 9  | 19  | 807 | 18  | 271 | 4.00E-26 | 100  |
| TcMYB28 | ATMYB30  | 27.24 | 257 | 181 | 4  | 19  | 771 | 17  | 247 | 5.00E-26 | 100  |
| TcMYB28 | ATMYB80  | 40.95 | 105 | 62  | 1  | 7   | 321 | 13  | 115 | 7.00E-26 | 99.8 |
| TcMYB28 | ATMYB121 | 37.72 | 114 | 71  | 1  | 19  | 360 | 32  | 143 | 8.00E-26 | 98.6 |
| TcMYB28 | ATMYB66  | 37.19 | 121 | 76  | 1  | 19  | 381 | 21  | 139 | 9.00E-26 | 96.7 |
| TcMYB28 | AtMYB45  | 38.58 | 127 | 74  | 3  | 4   | 372 | 15  | 139 | 1.00E-25 | 97.8 |
| TcMYB28 | AtMYB60  | 38.66 | 119 | 73  | 1  | 19  | 375 | 17  | 133 | 1.00E-25 | 98.2 |
| TcMYB28 | ATMYB75  | 35.33 | 167 | 101 | 5  | 19  | 498 | 13  | 171 | 2.00E-25 | 97.1 |
| TcMYB28 | AtMYB62  | 36.05 | 147 | 89  | 3  | 10  | 435 | 21  | 156 | 2.00E-25 | 97.8 |
| TcMYB28 | ATMYB71  | 40.57 | 106 | 63  | 1  | 19  | 336 | 23  | 126 | 2.00E-25 | 97.4 |
| TcMYB28 | ATMYB37  | 37.97 | 158 | 89  | 3  | 7   | 453 | 13  | 169 | 2.00E-25 | 98.6 |
| TcMYB28 | AtMYB81  | 30.85 | 201 | 120 | 4  | 19  | 564 | 25  | 223 | 2.00E-25 | 99.8 |
| TcMYB28 | AtMYB50  | 32.38 | 210 | 114 | 6  | 19  | 564 | 17  | 224 | 3.00E-25 | 97.8 |
| TcMYB28 | AtMYB24  | 35.07 | 134 | 85  | 2  | 19  | 414 | 22  | 153 | 4.00E-25 | 95.1 |
| TcMYB28 | ATMYB90  | 39.83 | 118 | 71  | 1  | 19  | 372 | 13  | 128 | 5.00E-25 | 95.9 |
| TcMYB28 | ATMYB0   | 32.9  | 155 | 94  | 2  | 19  | 453 | 19  | 171 | 6.00E-25 | 95.1 |
| TcMYB28 | ATMYB65  | 41.75 | 103 | 60  | 1  | 19  | 327 | 46  | 146 | 6.00E-25 | 99.4 |
| TcMYB28 | AtMYB27  | 41.51 | 106 | 62  | 1  | 10  | 327 | 11  | 114 | 7.00E-25 | 95.1 |
| TcMYB28 | ATMYB33  | 41.75 | 103 | 60  | 1  | 19  | 327 | 37  | 137 | 8.00E-25 | 99   |
| TcMYB28 | AtMYB114 | 39.67 | 121 | 73  | 2  | 19  | 381 | 13  | 130 | 8.00E-25 | 92   |
| TcMYB28 | AtMYB112 | 39.62 | 106 | 64  | 1  | 10  | 327 | 34  | 137 | 1.00E-24 | 94.7 |
| TcMYB28 | ATMYB84  | 33.33 | 165 | 105 | 4  | 19  | 498 | 17  | 178 | 1.00E-24 | 95.9 |
| TcMYB28 | AtMYB36  | 34.09 | 176 | 115 | 4  | 19  | 543 | 17  | 178 | 1.00E-24 | 96.3 |
| TcMYB28 | ATMYB31  | 31.67 | 240 | 151 | 10 | 19  | 699 | 17  | 239 | 2.00E-24 | 95.9 |
| TcMYB28 | ATMYB3   | 38.53 | 109 | 67  | 1  | 19  | 345 | 25  | 131 | 2.00E-24 | 93.6 |
| TcMYB28 | ATMYB14  | 34.69 | 147 | 90  | 3  | 7   | 429 | 13  | 155 | 2.00E-24 | 94   |
| TcMYB28 | ATMYB94  | 27.49 | 251 | 153 | 6  | 19  | 684 | 17  | 264 | 3.00E-24 | 95.5 |
| TcMYB28 | AtMYB74  | 32.04 | 181 | 107 | 3  | 19  | 513 | 18  | 196 | 3.00E-24 | 95.1 |
| TcMYB28 | ATMYB102 | 33.14 | 175 | 82  | 3  | 19  | 438 | 17  | 189 | 3.00E-24 | 95.5 |
| TcMYB28 | AtMYB17  | 44.55 | 101 | 56  | 1  | 19  | 321 | 17  | 115 | 4.00E-24 | 94.4 |
| TcMYB28 | ATMYB3   | 34.85 | 132 | 83  | 2  | 19  | 405 | 17  | 146 | 5.00E-24 | 93.2 |
| TcMYB28 | ATMYB123 | 38.02 | 121 | 72  | 2  | 10  | 363 | 16  | 134 | 5.00E-24 | 93.2 |
| TcMYB28 | AtMYB103 | 37.7  | 122 | 76  | 1  | 7   | 372 | 13  | 132 | 5.00E-24 | 95.1 |
| TcMYB28 | ATMYB2   | 38.83 | 103 | 63  | 1  | 19  | 327 | 25  | 125 | 7.00E-24 | 93.2 |
| TcMYB28 | ATMYB119 | 37.07 | 116 | 73  | 1  | 16  | 363 | 107 | 219 | 7.00E-24 | 95.5 |
| TcMYB28 | ATMYB119 | 29.49 | 78  | 51  | 2  | 175 | 396 | 105 | 182 | 6.00E-04 | 33.9 |
| TcMYB28 | ATMYB61  | 28.47 | 281 | 191 | 8  | 19  | 831 | 17  | 284 | 7.00E-24 | 94.7 |
| TcMYB28 | ATMYB86  | 27.65 | 217 | 155 | 3  | 19  | 663 | 17  | 227 | 8.00E-24 | 94.4 |
| TcMYB28 | AtMYB53  | 41.58 | 101 | 59  | 1  | 19  | 321 | 17  | 115 | 9.00E-24 | 93.6 |
| TcMYB28 | AtMYB113 | 39.83 | 118 | 71  | 1  | 19  | 372 | 13  | 128 | 1.00E-23 | 92   |
| TcMYB28 | ATMYB67  | 28.57 | 203 | 133 | 5  | 7   | 579 | 23  | 207 | 1.00E-23 | 93.2 |
| TcMYB28 | ATMYB92  | 26.58 | 237 | 173 | 3  | 19  | 726 | 17  | 247 | 1.00E-23 | 93.6 |
| TcMYB28 | AtMYB98  | 42.86 | 105 | 60  | 1  | 16  | 330 | 219 | 320 | 1.00E-23 | 94.7 |
| TcMYB28 | AtMYB98  | 32.38 | 105 | 70  | 2  | 25  | 336 | 169 | 271 | 9.00E-10 | 52.4 |
| TcMYB28 | ATMYB28  | 34.16 | 161 | 101 | 3  | 19  | 486 | 17  | 168 | 1.00E-23 | 94   |
| TcMYB28 | ATMYB55  | 38.76 | 129 | 69  | 2  | 19  | 375 | 17  | 143 | 1.00E-23 | 93.6 |
| TcMYB28 | AtMYB18  | 35.77 | 137 | 77  | 3  | 7   | 384 | 8   | 142 | 1.00E-23 | 92.4 |
| TcMYB28 | ATMYB5   | 33.58 | 137 | 81  | 3  | 7   | 387 | 24  | 158 | 1.00E-23 | 91.7 |
| TcMYB28 | ATMYB26  | 28.17 | 252 | 169 | 7  | 7   | 726 | 13  | 243 | 2.00E-23 | 93.6 |
| TcMYB28 | ATMYB38  | 28.31 | 219 | 148 | 3  | 7   | 636 | 13  | 230 | 2.00E-23 | 92.4 |
| TcMYB28 | AtMYB41  | 39.66 | 116 | 70  | 1  | 19  | 366 | 17  | 130 | 2.00E-23 | 92   |
| TcMYB28 | AtMYB104 | 39.25 | 107 | 65  | 1  | 10  | 330 | 18  | 122 | 2.00E-23 | 93.6 |
| TcMYB28 | ATMYB23  | 38.61 | 101 | 62  | 1  | 19  | 321 | 17  | 115 | 2.00E-23 | 90.5 |
| TcMYB28 | AtMYB107 | 39.6  | 101 | 61  | 1  | 19  | 321 | 17  | 115 | 3.00E-23 | 92.4 |
| TcMYB28 | ATMYB46  | 41.03 | 117 | 67  | 2  | 19  | 363 | 23  | 137 | 3.00E-23 | 91.7 |
| TcMYB28 | AtMYB108 | 38.89 | 108 | 66  | 1  | 7   | 330 | 20  | 125 | 3.00E-23 | 92.4 |
| TcMYB28 | ATMYB122 | 38.4  | 125 | 77  | 1  | 19  | 393 | 17  | 139 | 3.00E-23 | 92.4 |
| TcMYB28 | ATMYB15  | 40    | 105 | 63  | 1  | 7   | 321 | 13  | 115 | 4.00E-23 | 91.3 |
| TcMYB28 | AtMYB64  | 40    | 105 | 63  | 1  | 16  | 330 | 107 | 208 | 5.00E-23 | 92.8 |
| TcMYB28 | AtMYB64  | 28.57 | 70  | 49  | 1  | 130 | 336 | 90  | 159 | 2.00E-04 | 35.4 |
| TcMYB28 | AtMYB9   | 39.6  | 101 | 61  | 1  | 19  | 321 | 17  | 115 | 6.00E-23 | 91.7 |
| TcMYB28 | MYB8     | 31.45 | 124 | 85  | 1  | 19  | 390 | 17  | 138 | 6.00E-23 | 89   |
| TcMYB28 | AtMYB49  | 40.59 | 101 | 60  | 1  | 19  | 321 | 17  | 115 | 9.00E-23 | 90.9 |
| TcMYB28 | AtMYB10  | 38.89 | 108 | 66  | 1  | 7   | 330 | 15  | 120 | 1.00E-22 | 89   |
| TcMYB28 | ATMYB16  | 37.5  | 112 | 70  | 1  | 19  | 354 | 17  | 126 | 2.00E-22 | 90.1 |
| TcMYB28 | ATMYB29  | 35.15 | 165 | 107 | 4  | 19  | 513 | 17  | 161 | 2.00E-22 | 90.1 |
| TcMYB28 | ATMYB34  | 40.18 | 112 | 67  | 1  | 19  | 354 | 17  | 126 | 2.00E-22 | 89.4 |
| TcMYB28 | ATMYB106 | 37.5  | 112 | 70  | 1  | 19  | 354 | 60  | 169 | 2.00E-22 | 90.5 |
| TcMYB28 | AtMYB93  | 40.59 | 101 | 60  | 1  | 19  | 321 | 17  | 115 | 3.00E-22 | 90.1 |
| TcMYB28 | ATMYB58  | 37.27 | 110 | 69  | 1  | 7   | 336 | 15  | 122 | 3.00E-22 | 88.6 |
| TcMYB28 | ATMYB95  | 37.29 | 118 | 74  | 1  | 19  | 372 | 17  | 132 | 5.00E-22 | 87.8 |
| TcMYB28 | ATMYB4   | 42.27 | 97  | 56  | 1  | 19  | 309 | 17  | 111 | 6.00E-22 | 87.8 |
| TcMYB28 | ATMYB118 | 37.04 | 108 | 68  | 1  | 16  | 339 | 191 | 295 | 6.00E-22 | 89.7 |
| TcMYB28 | AtMYB42  | 38.98 | 118 | 72  | 1  | 1   | 354 | 11  | 126 | 1.00E-21 | 87   |
| TcMYB28 | ATMYB12  | 37.14 | 105 | 66  | 1  | 7   | 321 | 13  | 115 | 1.00E-21 | 88.2 |
| TcMYB28 | AtMYB32  | 36.61 | 112 | 71  | 1  | 19  | 354 | 17  | 126 | 1.00E-21 | 86.7 |

|         |           |       |     |     |    |     |      |     |     |          |      |
|---------|-----------|-------|-----|-----|----|-----|------|-----|-----|----------|------|
| TcMYB28 | AtMYB85   | 40.18 | 112 | 67  | 1  | 19  | 354  | 17  | 126 | 2.00E-21 | 86.3 |
| TcMYB28 | MYB7      | 36.61 | 112 | 71  | 1  | 19  | 354  | 17  | 126 | 2.00E-21 | 86.3 |
| TcMYB28 | ATMYB72   | 33.61 | 119 | 79  | 1  | 7   | 363  | 15  | 131 | 2.00E-21 | 86.7 |
| TcMYB28 | ATMYB68   | 38.79 | 116 | 66  | 3  | 19  | 351  | 17  | 130 | 3.00E-21 | 87   |
| TcMYB28 | AtMYB20   | 36.97 | 119 | 75  | 1  | 19  | 375  | 17  | 133 | 4.00E-21 | 85.5 |
| TcMYB28 | ATMYB87   | 38.24 | 102 | 62  | 2  | 19  | 321  | 17  | 116 | 7.00E-21 | 85.1 |
| TcMYB28 | ATMYB105  | 30    | 180 | 120 | 4  | 10  | 531  | 107 | 263 | 7.00E-21 | 85.5 |
| TcMYB28 | AtMYB56   | 38.32 | 107 | 66  | 1  | 10  | 330  | 93  | 196 | 9.00E-21 | 85.1 |
| TcMYB28 | AtMYB47   | 36.44 | 118 | 75  | 2  | 1   | 354  | 12  | 126 | 1.00E-20 | 84   |
| TcMYB28 | AtMYB83   | 35.65 | 115 | 74  | 1  | 19  | 363  | 35  | 147 | 1.00E-20 | 85.1 |
| TcMYB28 | AtMYB6    | 33.93 | 112 | 74  | 1  | 19  | 354  | 17  | 126 | 1.00E-20 | 83.2 |
| TcMYB28 | AtMYB117  | 28.33 | 180 | 129 | 2  | 10  | 549  | 98  | 272 | 1.00E-20 | 85.1 |
| TcMYB28 | ATMYB35   | 36.36 | 121 | 75  | 2  | 19  | 375  | 17  | 135 | 2.00E-20 | 84.3 |
| TcMYB28 | ATMYB13   | 34.29 | 140 | 92  | 3  | 19  | 438  | 17  | 143 | 2.00E-20 | 82.8 |
| TcMYB28 | AtMYB115  | 38.61 | 101 | 62  | 1  | 16  | 318  | 160 | 257 | 2.00E-20 | 84.3 |
| TcMYB28 | ATMYB25   | 42.42 | 99  | 57  | 1  | 4   | 300  | 48  | 143 | 3.00E-20 | 84   |
| TcMYB28 | ATMYB52   | 33.62 | 116 | 77  | 1  | 1   | 348  | 2   | 114 | 4.00E-20 | 82   |
| TcMYB28 | ATMYB69   | 33.61 | 119 | 79  | 1  | 7   | 363  | 18  | 133 | 4.00E-20 | 82   |
| TcMYB28 | AtMYB43   | 39.29 | 112 | 68  | 1  | 19  | 354  | 17  | 126 | 6.00E-20 | 82.8 |
| TcMYB28 | ATMYB111  | 33.33 | 105 | 70  | 1  | 7   | 321  | 13  | 115 | 7.00E-20 | 82.8 |
| TcMYB28 | ATMYB11   | 34.29 | 105 | 69  | 1  | 7   | 321  | 13  | 115 | 9.00E-20 | 82.4 |
| TcMYB28 | ATMYB73   | 40.43 | 94  | 56  | 1  | 19  | 300  | 16  | 106 | 1.00E-19 | 82   |
| TcMYB28 | ATMYB78   | 33.88 | 121 | 66  | 2  | 10  | 330  | 28  | 146 | 1.00E-19 | 82   |
| TcMYB28 | ATMYB110  | 33.33 | 129 | 86  | 1  | 10  | 396  | 67  | 192 | 2.00E-19 | 80.9 |
| TcMYB28 | ATMYB54   | 33.63 | 113 | 75  | 1  | 1   | 339  | 3   | 112 | 3.00E-19 | 79.3 |
| TcMYB28 | AtMYB70   | 39.81 | 103 | 58  | 2  | 4   | 300  | 7   | 106 | 3.00E-19 | 80.5 |
| TcMYB28 | AtMYB109  | 32.84 | 134 | 90  | 1  | 4   | 405  | 54  | 184 | 5.00E-19 | 80.9 |
| TcMYB28 | ATMYB99   | 37.74 | 106 | 61  | 1  | 19  | 321  | 18  | 123 | 5.00E-19 | 78.6 |
| TcMYB28 | ATMYB77   | 22.65 | 287 | 218 | 4  | 19  | 867  | 9   | 265 | 2.00E-18 | 78.2 |
| TcMYB28 | ATMYB44   | 27.35 | 234 | 164 | 5  | 19  | 702  | 9   | 221 | 2.00E-18 | 77.8 |
| TcMYB28 | AtMYB1    | 39.36 | 94  | 57  | 1  | 19  | 300  | 58  | 148 | 3.00E-18 | 78.2 |
| TcMYB28 | AtMYB40   | 33.62 | 116 | 77  | 1  | 7   | 354  | 13  | 126 | 8.00E-18 | 75.5 |
| TcMYB28 | AtMYB100  | 27.52 | 149 | 108 | 2  | 7   | 453  | 25  | 167 | 2.00E-17 | 73.9 |
| TcMYB28 | ATMYB88   | 29.77 | 131 | 88  | 2  | 4   | 384  | 24  | 151 | 3.00E-16 | 72.8 |
| TcMYB28 | AtMYB22   | 30    | 120 | 84  | 2  | 10  | 369  | 54  | 169 | 9.00E-16 | 69.3 |
| TcMYB28 | AtMYB124  | 28.12 | 128 | 86  | 3  | 4   | 369  | 19  | 143 | 1.00E-14 | 67.8 |
| TcMYB28 | AtMYB89   | 32.98 | 94  | 63  | 1  | 19  | 300  | 59  | 149 | 1.00E-13 | 62   |
| TcMYB29 | AtMYB124  | 34.43 | 517 | 332 | 14 | 58  | 1587 | 19  | 436 | 6.00E-75 | 237  |
| TcMYB29 | ATMYB88   | 32.31 | 523 | 346 | 12 | 43  | 1587 | 19  | 484 | 4.00E-73 | 233  |
| TcMYB29 | ATMYB118  | 42.24 | 116 | 67  | 0  | 85  | 432  | 192 | 307 | 5.00E-33 | 123  |
| TcMYB29 | ATMYB118  | 27.5  | 120 | 85  | 3  | 88  | 441  | 144 | 259 | 2.00E-07 | 45.4 |
| TcMYB29 | ATMYB119  | 38.76 | 129 | 73  | 1  | 85  | 453  | 108 | 236 | 7.00E-30 | 114  |
| TcMYB29 | AtMYB64   | 47.06 | 102 | 54  | 0  | 85  | 390  | 108 | 209 | 1.00E-29 | 113  |
| TcMYB29 | AtMYB64   | 29.73 | 74  | 51  | 1  | 232 | 450  | 105 | 178 | 7.00E-05 | 37.4 |
| TcMYB29 | AtMYB100  | 32.47 | 194 | 117 | 4  | 58  | 597  | 20  | 213 | 8.00E-28 | 104  |
| TcMYB29 | AtMYB115  | 42.99 | 107 | 61  | 0  | 85  | 405  | 161 | 267 | 2.00E-27 | 105  |
| TcMYB29 | AtMYB115  | 29.01 | 131 | 92  | 2  | 232 | 621  | 158 | 281 | 1.00E-08 | 48.9 |
| TcMYB29 | AtMYB98   | 45.1  | 102 | 56  | 0  | 85  | 390  | 220 | 321 | 3.00E-26 | 103  |
| TcMYB29 | AtMYB98   | 28.57 | 84  | 59  | 1  | 202 | 450  | 207 | 290 | 4.00E-08 | 47.8 |
| TcMYB29 | AtMYB98   | 34.38 | 64  | 42  | 2  | 43  | 234  | 262 | 320 | 4.00E-05 | 38.1 |
| TcMYB29 | AtMYB70   | 38.89 | 126 | 76  | 1  | 58  | 432  | 7   | 132 | 6.00E-26 | 100  |
| TcMYB29 | AtMYB79   | 38.46 | 130 | 78  | 3  | 85  | 468  | 11  | 137 | 1.00E-25 | 99   |
| TcMYB29 | ATMYB66   | 46.85 | 111 | 53  | 3  | 85  | 399  | 21  | 131 | 9.00E-25 | 94.7 |
| TcMYB29 | ATMYB121  | 35.38 | 130 | 83  | 1  | 85  | 471  | 32  | 161 | 2.00E-24 | 95.9 |
| TcMYB29 | ATMYB73   | 41.12 | 107 | 62  | 1  | 58  | 375  | 7   | 113 | 3.00E-24 | 96.3 |
| TcMYB29 | ATMYB77   | 44.23 | 104 | 57  | 1  | 67  | 375  | 3   | 106 | 1.00E-23 | 94   |
| TcMYB29 | ATMYB0    | 43.97 | 116 | 58  | 3  | 85  | 411  | 19  | 134 | 1.00E-23 | 92   |
| TcMYB29 | ATMYB71   | 35.66 | 129 | 82  | 2  | 85  | 468  | 23  | 149 | 2.00E-23 | 92.4 |
| TcMYB29 | ATMYB59-3 | 41.75 | 103 | 59  | 1  | 85  | 390  | 13  | 115 | 3.00E-23 | 91.3 |
| TcMYB29 | ATMYB48   | 42.72 | 103 | 58  | 1  | 85  | 390  | 12  | 114 | 3.00E-23 | 91.7 |
| TcMYB29 | ATMYB110  | 41.9  | 105 | 60  | 1  | 85  | 396  | 70  | 174 | 6.00E-23 | 92   |
| TcMYB29 | ATMYB2    | 31.84 | 179 | 119 | 4  | 7   | 534  | 4   | 175 | 6.00E-23 | 91.3 |
| TcMYB29 | ATMYB23   | 46    | 100 | 52  | 2  | 85  | 378  | 17  | 116 | 1.00E-22 | 89.4 |
| TcMYB29 | ATMYB44   | 44.23 | 104 | 57  | 1  | 67  | 375  | 3   | 106 | 1.00E-22 | 91.3 |
| TcMYB29 | ATMYB3    | 34.31 | 137 | 89  | 3  | 85  | 492  | 25  | 157 | 2.00E-22 | 88.6 |
| TcMYB29 | ATMYB35   | 44.12 | 102 | 56  | 2  | 85  | 387  | 17  | 115 | 2.00E-22 | 90.5 |
| TcMYB29 | ATMYB35   | 33.33 | 66  | 44  | 2  | 52  | 249  | 63  | 123 | 2.00E-04 | 35.4 |
| TcMYB29 | AtMYB116  | 36.04 | 111 | 70  | 1  | 85  | 414  | 23  | 133 | 2.00E-22 | 89.7 |
| TcMYB29 | ATMYB105  | 36.19 | 105 | 67  | 0  | 85  | 399  | 110 | 214 | 3.00E-22 | 90.5 |
| TcMYB29 | AtMYB1    | 39.47 | 114 | 67  | 1  | 64  | 399  | 51  | 164 | 3.00E-22 | 91.3 |
| TcMYB29 | ATMYB123  | 33.8  | 142 | 86  | 3  | 85  | 486  | 19  | 160 | 4.00E-22 | 88.6 |
| TcMYB29 | AtMYB89   | 32.58 | 132 | 89  | 1  | 7   | 402  | 34  | 164 | 6.00E-22 | 86.3 |
| TcMYB29 | ATMYB46   | 34.87 | 152 | 94  | 3  | 85  | 525  | 23  | 174 | 8.00E-22 | 88.2 |
| TcMYB29 | AtMYB82   | 40.87 | 115 | 67  | 2  | 85  | 426  | 17  | 129 | 8.00E-22 | 86.3 |
| TcMYB29 | AtMYB109  | 42.27 | 97  | 56  | 0  | 85  | 375  | 59  | 155 | 1.00E-21 | 89.7 |
| TcMYB29 | AtMYB109  | 39.06 | 64  | 37  | 2  | 232 | 417  | 56  | 119 | 3.00E-06 | 41.6 |
| TcMYB29 | AtMYB109  | 33.33 | 48  | 32  | 1  | 85  | 228  | 111 | 157 | 3.00E-04 | 35.4 |
| TcMYB29 | AtMYB117  | 37.5  | 104 | 65  | 0  | 85  | 396  | 101 | 204 | 1.00E-21 | 89   |
| TcMYB29 | AtMYB117  | 32.81 | 64  | 41  | 2  | 232 | 417  | 98  | 161 | 3.00E-05 | 38.5 |
| TcMYB29 | AtMYB27   | 39.05 | 105 | 62  | 2  | 85  | 393  | 14  | 117 | 1.00E-21 | 86.7 |

|         |          |       |     |     |   |     |     |    |     |          |      |
|---------|----------|-------|-----|-----|---|-----|-----|----|-----|----------|------|
| TcMYB29 | AtMYB62  | 36.04 | 111 | 70  | 1 | 85  | 414 | 24 | 134 | 2.00E-21 | 87.4 |
| TcMYB29 | ATMYB69  | 36.61 | 112 | 71  | 0 | 85  | 420 | 22 | 133 | 2.00E-21 | 86.3 |
| TcMYB29 | AtMYB22  | 31.34 | 134 | 92  | 2 | 4   | 405 | 34 | 162 | 2.00E-21 | 86.3 |
| TcMYB29 | AtMYB22  | 31.51 | 73  | 50  | 0 | 232 | 450 | 54 | 126 | 9.00E-07 | 42.7 |
| TcMYB29 | AtMYB112 | 33.82 | 136 | 89  | 2 | 10  | 414 | 22 | 147 | 3.00E-21 | 85.5 |
| TcMYB29 | AtMYB24  | 44.44 | 90  | 49  | 1 | 85  | 351 | 22 | 111 | 5.00E-21 | 84.3 |
| TcMYB29 | ATMYB57  | 36.97 | 119 | 74  | 1 | 85  | 438 | 30 | 148 | 6.00E-21 | 84   |
| TcMYB29 | ATMYB61  | 39.81 | 108 | 64  | 1 | 85  | 405 | 17 | 124 | 8.00E-21 | 86.7 |
| TcMYB29 | ATMYB14  | 32.17 | 143 | 88  | 3 | 85  | 486 | 17 | 157 | 1.00E-20 | 84.3 |
| TcMYB29 | ATMYB13  | 32.09 | 134 | 88  | 3 | 85  | 477 | 17 | 149 | 1.00E-20 | 84   |
| TcMYB29 | ATMYB52  | 37.86 | 103 | 64  | 0 | 85  | 393 | 8  | 110 | 2.00E-20 | 83.6 |
| TcMYB29 | ATMYB52  | 31.25 | 64  | 42  | 2 | 232 | 417 | 5  | 68  | 3.00E-05 | 38.1 |
| TcMYB29 | ATMYB67  | 25.84 | 209 | 147 | 4 | 85  | 687 | 27 | 234 | 2.00E-20 | 84.3 |
| TcMYB29 | AtMYB83  | 41.28 | 109 | 60  | 2 | 85  | 399 | 35 | 140 | 3.00E-20 | 84.7 |
| TcMYB29 | ATMYB65  | 34.78 | 138 | 79  | 4 | 4   | 384 | 10 | 146 | 5.00E-20 | 85.5 |
| TcMYB29 | ATMYB54  | 36.89 | 103 | 65  | 0 | 85  | 393 | 9  | 111 | 5.00E-20 | 82   |
| TcMYB29 | MYB7     | 25.78 | 256 | 177 | 8 | 85  | 813 | 17 | 248 | 8.00E-20 | 82   |
| TcMYB29 | AtMYB50  | 34.97 | 143 | 88  | 2 | 85  | 498 | 17 | 159 | 9.00E-20 | 82.8 |
| TcMYB29 | AtMYB103 | 37.72 | 114 | 70  | 1 | 85  | 423 | 17 | 130 | 9.00E-20 | 83.6 |
| TcMYB29 | ATMYB87  | 33.85 | 130 | 84  | 2 | 85  | 468 | 17 | 146 | 1.00E-19 | 82.4 |
| TcMYB29 | ATMYB3   | 34.13 | 126 | 81  | 2 | 85  | 456 | 17 | 142 | 1.00E-19 | 81.3 |
| TcMYB29 | ATMYB86  | 40.78 | 103 | 59  | 2 | 85  | 387 | 17 | 119 | 1.00E-19 | 82.8 |
| TcMYB29 | ATMYB80  | 41.35 | 104 | 60  | 2 | 85  | 393 | 17 | 117 | 2.00E-19 | 82   |
| TcMYB29 | ATMYB80  | 31.17 | 77  | 51  | 3 | 85  | 309 | 70 | 136 | 4.00E-04 | 34.7 |
| TcMYB29 | AtMYB108 | 35.14 | 111 | 71  | 1 | 85  | 414 | 24 | 134 | 2.00E-19 | 82   |
| TcMYB29 | ATMYB33  | 38.61 | 101 | 61  | 1 | 85  | 384 | 37 | 137 | 2.00E-19 | 83.6 |
| TcMYB29 | AtMYB10  | 32.17 | 143 | 94  | 4 | 85  | 504 | 19 | 158 | 2.00E-19 | 80.1 |
| TcMYB29 | ATMYB5   | 32.88 | 146 | 86  | 3 | 85  | 486 | 28 | 173 | 3.00E-19 | 80.1 |
| TcMYB29 | ATMYB34  | 39.81 | 103 | 61  | 1 | 85  | 390 | 17 | 119 | 3.00E-19 | 80.9 |
| TcMYB29 | ATMYB34  | 31.48 | 54  | 35  | 2 | 85  | 240 | 70 | 120 | 5.00E-04 | 34.3 |
| TcMYB29 | AtMYB32  | 34.68 | 124 | 66  | 2 | 85  | 411 | 17 | 140 | 3.00E-19 | 80.5 |
| TcMYB29 | ATMYB101 | 34.65 | 101 | 65  | 1 | 85  | 384 | 23 | 123 | 4.00E-19 | 82.4 |
| TcMYB29 | ATMYB25  | 38.78 | 98  | 59  | 1 | 85  | 375 | 53 | 150 | 5.00E-19 | 81.3 |
| TcMYB29 | ATMYB58  | 37.96 | 108 | 66  | 2 | 85  | 405 | 19 | 123 | 5.00E-19 | 79.7 |
| TcMYB29 | AtMYB9   | 36.73 | 98  | 61  | 1 | 85  | 375 | 17 | 114 | 7.00E-19 | 80.5 |
| TcMYB29 | AtMYB41  | 36.73 | 98  | 61  | 1 | 85  | 375 | 17 | 114 | 8.00E-19 | 79.3 |
| TcMYB29 | AtMYB41  | 29.41 | 68  | 46  | 3 | 52  | 249 | 63 | 123 | 3.00E-04 | 35   |
| TcMYB29 | ATMYB15  | 32.84 | 134 | 89  | 2 | 85  | 483 | 17 | 147 | 9.00E-19 | 79.3 |
| TcMYB29 | AtMYB56  | 37.23 | 94  | 59  | 0 | 85  | 366 | 96 | 189 | 1.00E-18 | 79.7 |
| TcMYB29 | AtMYB56  | 27.71 | 83  | 57  | 3 | 169 | 408 | 71 | 153 | 6.00E-04 | 34.3 |
| TcMYB29 | ATMYB26  | 39.25 | 107 | 55  | 1 | 85  | 375 | 17 | 123 | 1.00E-18 | 80.1 |
| TcMYB29 | AtMYB47  | 33.58 | 137 | 87  | 3 | 85  | 483 | 17 | 153 | 1.00E-18 | 78.6 |
| TcMYB29 | ATMYB94  | 32.19 | 146 | 95  | 3 | 85  | 510 | 17 | 161 | 2.00E-18 | 79.3 |
| TcMYB29 | ATMYB12  | 41    | 100 | 57  | 2 | 85  | 378 | 17 | 116 | 2.00E-18 | 79.7 |
| TcMYB29 | AtMYB6   | 35.96 | 114 | 71  | 2 | 85  | 420 | 17 | 130 | 2.00E-18 | 77.4 |
| TcMYB29 | AtMYB45  | 33.09 | 136 | 89  | 3 | 85  | 486 | 23 | 156 | 2.00E-18 | 77.8 |
| TcMYB29 | ATMYB63  | 31.48 | 162 | 108 | 4 | 85  | 561 | 19 | 179 | 2.00E-18 | 78.2 |
| TcMYB29 | AtMYB107 | 36.73 | 98  | 61  | 1 | 85  | 375 | 17 | 114 | 2.00E-18 | 78.6 |
| TcMYB29 | AtMYB36  | 34.31 | 137 | 86  | 3 | 85  | 483 | 17 | 153 | 3.00E-18 | 78.6 |
| TcMYB29 | ATMYB92  | 38    | 100 | 60  | 2 | 85  | 378 | 17 | 116 | 3.00E-18 | 78.6 |
| TcMYB29 | AtMYB74  | 37.76 | 98  | 60  | 1 | 85  | 375 | 18 | 115 | 3.00E-18 | 78.2 |
| TcMYB29 | AtMYB74  | 31.82 | 66  | 45  | 2 | 52  | 249 | 64 | 124 | 4.00E-04 | 34.7 |
| TcMYB29 | AtMYB60  | 31.82 | 132 | 89  | 3 | 85  | 477 | 17 | 142 | 4.00E-18 | 77.4 |
| TcMYB29 | ATMYB4   | 41.18 | 102 | 56  | 3 | 85  | 378 | 17 | 116 | 4.00E-18 | 77.4 |
| TcMYB29 | ATMYB4   | 24.21 | 95  | 70  | 3 | 85  | 363 | 70 | 157 | 7.00E-05 | 37   |
| TcMYB29 | ATMYB95  | 36.89 | 103 | 63  | 2 | 85  | 387 | 17 | 119 | 4.00E-18 | 77   |
| TcMYB29 | MYB8     | 30.67 | 150 | 87  | 3 | 85  | 483 | 17 | 166 | 5.00E-18 | 75.5 |
| TcMYB29 | AtMYB93  | 39    | 100 | 59  | 2 | 85  | 378 | 17 | 116 | 7.00E-18 | 77.8 |
| TcMYB29 | AtMYB114 | 34.21 | 114 | 74  | 2 | 85  | 423 | 13 | 125 | 7.00E-18 | 73.2 |
| TcMYB29 | ATMYB84  | 31.08 | 148 | 100 | 2 | 85  | 522 | 17 | 164 | 7.00E-18 | 77   |
| TcMYB29 | AtMYB19  | 38    | 100 | 59  | 2 | 85  | 375 | 17 | 114 | 7.00E-18 | 76.3 |
| TcMYB29 | AtMYB97  | 32.35 | 102 | 68  | 1 | 85  | 387 | 24 | 125 | 8.00E-18 | 77.8 |
| TcMYB29 | AtMYB51  | 32.09 | 134 | 89  | 2 | 85  | 480 | 18 | 151 | 8.00E-18 | 77.4 |
| TcMYB29 | AtMYB18  | 34.51 | 113 | 73  | 1 | 85  | 420 | 15 | 127 | 9.00E-18 | 76.3 |
| TcMYB29 | AtMYB40  | 37.86 | 103 | 62  | 3 | 85  | 387 | 17 | 115 | 9.00E-18 | 75.9 |
| TcMYB29 | AtMYB53  | 39    | 100 | 59  | 2 | 85  | 378 | 17 | 116 | 9.00E-18 | 76.6 |
| TcMYB29 | AtMYB53  | 33.33 | 54  | 36  | 1 | 88  | 249 | 72 | 123 | 3.00E-04 | 35   |
| TcMYB29 | AtMYB81  | 33.66 | 101 | 66  | 1 | 85  | 384 | 25 | 125 | 1.00E-17 | 77.8 |
| TcMYB29 | ATMYB72  | 37.04 | 108 | 65  | 3 | 85  | 399 | 19 | 125 | 1.00E-17 | 76.3 |
| TcMYB29 | ATMYB11  | 38    | 100 | 60  | 2 | 85  | 378 | 17 | 116 | 1.00E-17 | 76.6 |
| TcMYB29 | ATMYB102 | 36.73 | 98  | 61  | 1 | 85  | 375 | 17 | 114 | 3.00E-17 | 75.9 |
| TcMYB29 | AtMYB17  | 37.37 | 99  | 60  | 2 | 85  | 375 | 17 | 114 | 3.00E-17 | 75.1 |
| TcMYB29 | ATMYB37  | 39.09 | 110 | 65  | 3 | 85  | 408 | 17 | 123 | 3.00E-17 | 75.5 |
| TcMYB29 | ATMYB78  | 33.6  | 125 | 68  | 2 | 85  | 414 | 31 | 155 | 3.00E-17 | 75.1 |
| TcMYB29 | ATMYB122 | 36.89 | 103 | 64  | 1 | 85  | 390 | 17 | 119 | 4.00E-17 | 75.1 |
| TcMYB29 | ATMYB122 | 35.85 | 53  | 34  | 2 | 91  | 249 | 73 | 123 | 3.00E-05 | 38.5 |
| TcMYB29 | ATMYB68  | 36.94 | 111 | 68  | 3 | 85  | 411 | 17 | 124 | 4.00E-17 | 75.5 |
| TcMYB29 | ATMYB111 | 37    | 100 | 61  | 2 | 85  | 378 | 17 | 116 | 4.00E-17 | 75.1 |
| TcMYB29 | ATMYB55  | 34.55 | 110 | 59  | 1 | 85  | 375 | 17 | 126 | 6.00E-17 | 74.7 |
| TcMYB29 | ATMYB55  | 31.75 | 63  | 43  | 1 | 85  | 273 | 82 | 143 | 1.00E-04 | 36.6 |

|         |          |       |     |     |    |     |     |     |     |          |      |
|---------|----------|-------|-----|-----|----|-----|-----|-----|-----|----------|------|
| TcMYB29 | AtMYB49  | 35.71 | 98  | 62  | 1  | 85  | 375 | 17  | 114 | 6.00E-17 | 74.3 |
| TcMYB29 | ATMYB96  | 36.75 | 117 | 73  | 3  | 85  | 432 | 17  | 131 | 6.00E-17 | 74.7 |
| TcMYB29 | AtMYB113 | 32.59 | 135 | 88  | 3  | 82  | 477 | 12  | 138 | 1.00E-16 | 72.4 |
| TcMYB29 | ATMYB75  | 38.71 | 93  | 56  | 1  | 85  | 360 | 13  | 105 | 1.00E-16 | 72.4 |
| TcMYB29 | ATMYB75  | 37.5  | 48  | 30  | 2  | 88  | 231 | 68  | 113 | 8.00E-04 | 33.5 |
| TcMYB29 | ATMYB38  | 37.86 | 103 | 62  | 3  | 85  | 387 | 17  | 116 | 1.00E-16 | 73.2 |
| TcMYB29 | AtMYB104 | 34.31 | 102 | 66  | 1  | 85  | 387 | 21  | 122 | 1.00E-16 | 73.9 |
| TcMYB29 | ATMYB91  | 31.71 | 123 | 80  | 2  | 85  | 441 | 7   | 129 | 2.00E-16 | 73.6 |
| TcMYB29 | ATMYB29  | 27.52 | 218 | 146 | 3  | 85  | 702 | 17  | 231 | 2.00E-16 | 73.2 |
| TcMYB29 | ATMYB120 | 33.33 | 99  | 65  | 1  | 85  | 378 | 31  | 129 | 2.00E-16 | 74.3 |
| TcMYB29 | ATMYB28  | 37.76 | 98  | 60  | 1  | 85  | 375 | 17  | 114 | 3.00E-16 | 72.8 |
| TcMYB29 | ATMYB28  | 31.58 | 57  | 37  | 2  | 85  | 249 | 70  | 123 | 4.00E-04 | 34.7 |
| TcMYB29 | AtMYB76  | 38.78 | 98  | 59  | 1  | 85  | 375 | 17  | 114 | 3.00E-16 | 72.4 |
| TcMYB29 | AtMYB20  | 36.89 | 103 | 62  | 3  | 85  | 384 | 17  | 118 | 3.00E-16 | 71.6 |
| TcMYB29 | AtMYB20  | 24.41 | 127 | 86  | 5  | 142 | 492 | 88  | 201 | 2.00E-04 | 35.8 |
| TcMYB29 | ATMYB90  | 37.74 | 106 | 65  | 2  | 85  | 399 | 13  | 115 | 4.00E-16 | 70.9 |
| TcMYB29 | ATMYB16  | 32.31 | 130 | 79  | 4  | 85  | 447 | 17  | 145 | 4.00E-16 | 72   |
| TcMYB29 | AtMYB42  | 33.9  | 118 | 77  | 2  | 85  | 435 | 17  | 131 | 6.00E-16 | 70.9 |
| TcMYB29 | ATMYB31  | 34.17 | 120 | 75  | 3  | 85  | 432 | 17  | 136 | 7.00E-16 | 71.2 |
| TcMYB29 | AtMYB85  | 27.75 | 173 | 117 | 4  | 85  | 579 | 17  | 182 | 9.00E-16 | 70.1 |
| TcMYB29 | ATMYB106 | 34.69 | 98  | 63  | 1  | 85  | 375 | 60  | 157 | 1.00E-15 | 71.2 |
| TcMYB29 | ATMYB30  | 30.09 | 113 | 78  | 2  | 85  | 420 | 17  | 128 | 2.00E-15 | 69.7 |
| TcMYB29 | ATMYB99  | 33.04 | 115 | 58  | 2  | 175 | 462 | 56  | 170 | 5.00E-15 | 67.4 |
| TcMYB29 | AtMYB43  | 36.89 | 103 | 62  | 3  | 85  | 384 | 17  | 118 | 3.00E-14 | 66.2 |
| TcMYB29 | AtMYB43  | 28.57 | 91  | 65  | 2  | 142 | 414 | 88  | 163 | 2.00E-04 | 35.4 |
| TcMYB30 | ATMYB73  | 50.22 | 229 | 113 | 3  | 22  | 705 | 7   | 213 | 2.00E-71 | 216  |
| TcMYB30 | AtMYB70  | 48.55 | 241 | 116 | 5  | 22  | 720 | 7   | 233 | 1.00E-68 | 209  |
| TcMYB30 | ATMYB77  | 47.11 | 225 | 116 | 3  | 31  | 696 | 3   | 218 | 1.00E-65 | 201  |
| TcMYB30 | ATMYB44  | 46.61 | 236 | 119 | 3  | 31  | 717 | 3   | 214 | 8.00E-64 | 196  |
| TcMYB30 | AtMYB109 | 68.93 | 103 | 32  | 0  | 34  | 342 | 54  | 156 | 2.00E-51 | 167  |
| TcMYB30 | AtMYB109 | 21.33 | 225 | 175 | 10 | 202 | 870 | 58  | 260 | 3.00E-04 | 34.3 |
| TcMYB30 | AtMYB1   | 68.27 | 104 | 33  | 0  | 31  | 342 | 52  | 155 | 6.00E-49 | 160  |
| TcMYB30 | ATMYB25  | 60.55 | 109 | 43  | 0  | 16  | 342 | 42  | 150 | 3.00E-46 | 152  |
| TcMYB30 | ATMYB54  | 55.45 | 101 | 45  | 0  | 40  | 342 | 6   | 106 | 1.00E-41 | 137  |
| TcMYB30 | ATMYB52  | 52.48 | 101 | 48  | 0  | 40  | 342 | 5   | 105 | 6.00E-40 | 133  |
| TcMYB30 | AtMYB117 | 52.83 | 106 | 50  | 0  | 40  | 357 | 98  | 203 | 1.00E-39 | 135  |
| TcMYB30 | AtMYB56  | 56.44 | 101 | 44  | 0  | 40  | 342 | 93  | 193 | 3.00E-39 | 133  |
| TcMYB30 | ATMYB105 | 54.46 | 101 | 46  | 0  | 40  | 342 | 107 | 207 | 6.00E-39 | 132  |
| TcMYB30 | ATMYB69  | 52.48 | 101 | 48  | 0  | 40  | 342 | 19  | 119 | 1.00E-38 | 129  |
| TcMYB30 | ATMYB110 | 47.32 | 112 | 57  | 1  | 13  | 342 | 56  | 167 | 3.00E-35 | 122  |
| TcMYB30 | AtMYB64  | 39.33 | 150 | 80  | 2  | 37  | 453 | 104 | 253 | 3.00E-33 | 119  |
| TcMYB30 | ATMYB119 | 40.97 | 144 | 81  | 2  | 7   | 426 | 94  | 237 | 4.00E-33 | 119  |
| TcMYB30 | AtMYB98  | 46.96 | 115 | 61  | 0  | 4   | 348 | 205 | 319 | 6.00E-33 | 118  |
| TcMYB30 | AtMYB47  | 39.63 | 164 | 90  | 3  | 40  | 504 | 14  | 177 | 7.00E-33 | 115  |
| TcMYB30 | ATMYB118 | 49.11 | 112 | 57  | 0  | 13  | 348 | 180 | 291 | 1.00E-32 | 117  |
| TcMYB30 | ATMYB34  | 52.94 | 102 | 47  | 1  | 40  | 342 | 14  | 115 | 2.00E-32 | 114  |
| TcMYB30 | AtMYB49  | 48.7  | 115 | 58  | 1  | 1   | 342 | 1   | 115 | 2.00E-32 | 115  |
| TcMYB30 | ATMYB121 | 52.48 | 101 | 47  | 1  | 40  | 339 | 29  | 129 | 2.00E-32 | 114  |
| TcMYB30 | ATMYB96  | 33.61 | 241 | 150 | 8  | 22  | 714 | 8   | 228 | 4.00E-32 | 115  |
| TcMYB30 | AtMYB51  | 34.86 | 218 | 128 | 4  | 40  | 651 | 15  | 232 | 5.00E-32 | 114  |
| TcMYB30 | ATMYB92  | 50.98 | 102 | 49  | 1  | 40  | 342 | 14  | 115 | 5.00E-32 | 114  |
| TcMYB30 | ATMYB80  | 50    | 104 | 51  | 1  | 40  | 348 | 14  | 117 | 8.00E-32 | 113  |
| TcMYB30 | AtMYB97  | 52.48 | 101 | 47  | 1  | 40  | 339 | 21  | 121 | 9.00E-32 | 114  |
| TcMYB30 | ATMYB46  | 41.38 | 145 | 84  | 2  | 40  | 471 | 20  | 158 | 1.00E-31 | 112  |
| TcMYB30 | AtMYB41  | 51.96 | 102 | 48  | 1  | 40  | 342 | 14  | 115 | 1.00E-31 | 112  |
| TcMYB30 | ATMYB31  | 31.12 | 241 | 155 | 6  | 22  | 711 | 8   | 239 | 1.00E-31 | 113  |
| TcMYB30 | ATMYB23  | 46.96 | 115 | 60  | 1  | 1   | 342 | 1   | 115 | 1.00E-31 | 110  |
| TcMYB30 | ATMYB95  | 51.96 | 102 | 48  | 1  | 40  | 342 | 14  | 115 | 2.00E-31 | 111  |
| TcMYB30 | AtMYB89  | 45.45 | 99  | 54  | 0  | 43  | 339 | 57  | 155 | 2.00E-31 | 109  |
| TcMYB30 | AtMYB60  | 43.41 | 129 | 68  | 3  | 40  | 411 | 14  | 126 | 2.00E-31 | 111  |
| TcMYB30 | ATMYB94  | 39.47 | 152 | 82  | 5  | 40  | 465 | 14  | 159 | 3.00E-31 | 112  |
| TcMYB30 | ATMYB14  | 50.96 | 104 | 50  | 1  | 40  | 348 | 14  | 117 | 4.00E-31 | 110  |
| TcMYB30 | ATMYB35  | 51.96 | 102 | 48  | 1  | 40  | 342 | 14  | 115 | 4.00E-31 | 111  |
| TcMYB30 | ATMYB63  | 48.18 | 110 | 56  | 1  | 40  | 366 | 16  | 125 | 5.00E-31 | 110  |
| TcMYB30 | ATMYB63  | 25.97 | 77  | 57  | 1  | 31  | 261 | 66  | 141 | 4.00E-04 | 33.5 |
| TcMYB30 | ATMYB30  | 35.18 | 199 | 105 | 6  | 40  | 564 | 14  | 201 | 6.00E-31 | 111  |
| TcMYB30 | AtMYB107 | 50    | 102 | 50  | 1  | 40  | 342 | 14  | 115 | 1.00E-30 | 110  |
| TcMYB30 | ATMYB106 | 51.96 | 102 | 48  | 1  | 40  | 342 | 57  | 158 | 1.00E-30 | 111  |
| TcMYB30 | AtMYB115 | 41.86 | 129 | 75  | 1  | 40  | 426 | 158 | 279 | 2.00E-30 | 110  |
| TcMYB30 | AtMYB82  | 49.02 | 102 | 51  | 1  | 40  | 342 | 14  | 115 | 2.00E-30 | 107  |
| TcMYB30 | ATMYB66  | 50    | 102 | 50  | 1  | 40  | 342 | 18  | 119 | 2.00E-30 | 107  |
| TcMYB30 | ATMYB13  | 44.19 | 129 | 70  | 3  | 22  | 402 | 8   | 127 | 2.00E-30 | 108  |
| TcMYB30 | ATMYB26  | 47.83 | 115 | 50  | 2  | 40  | 354 | 14  | 128 | 2.00E-30 | 110  |
| TcMYB30 | AtMYB74  | 50.98 | 102 | 49  | 1  | 40  | 342 | 15  | 116 | 3.00E-30 | 109  |
| TcMYB30 | ATMYB48  | 46.3  | 108 | 57  | 2  | 22  | 342 | 4   | 110 | 3.00E-30 | 107  |
| TcMYB30 | ATMYB16  | 50.98 | 102 | 49  | 1  | 40  | 342 | 14  | 115 | 3.00E-30 | 109  |
| TcMYB30 | ATMYB101 | 50.98 | 102 | 49  | 1  | 40  | 342 | 20  | 121 | 3.00E-30 | 111  |
| TcMYB30 | AtMYB53  | 45.22 | 115 | 62  | 1  | 1   | 342 | 1   | 115 | 3.00E-30 | 108  |
| TcMYB30 | AtMYB79  | 49.07 | 108 | 54  | 2  | 22  | 342 | 3   | 109 | 4.00E-30 | 107  |
| TcMYB30 | AtMYB45  | 38.41 | 164 | 100 | 3  | 40  | 528 | 20  | 172 | 4.00E-30 | 107  |

|         |           |       |     |     |   |     |      |     |     |           |      |
|---------|-----------|-------|-----|-----|---|-----|------|-----|-----|-----------|------|
| TcMYB30 | ATMYB72   | 44.19 | 129 | 68  | 4 | 40  | 414  | 16  | 143 | 4.00E-30  | 108  |
| TcMYB30 | ATMYB59-3 | 45.1  | 102 | 55  | 1 | 40  | 342  | 10  | 111 | 4.00E-30  | 107  |
| TcMYB30 | AtMYB17   | 48.54 | 103 | 51  | 2 | 40  | 342  | 14  | 115 | 5.00E-30  | 108  |
| TcMYB30 | AtMYB9    | 50.98 | 102 | 49  | 1 | 40  | 342  | 14  | 115 | 7.00E-30  | 108  |
| TcMYB30 | ATMYB122  | 49.5  | 101 | 50  | 1 | 40  | 339  | 14  | 114 | 1.00E-29  | 108  |
| TcMYB30 | AtMYB6    | 48.21 | 112 | 57  | 1 | 22  | 354  | 8   | 119 | 1.00E-29  | 105  |
| TcMYB30 | AtMYB62   | 33.7  | 181 | 119 | 4 | 7   | 546  | 10  | 171 | 1.00E-29  | 107  |
| TcMYB30 | ATMYB4    | 49.07 | 108 | 54  | 1 | 22  | 342  | 8   | 115 | 2.00E-29  | 106  |
| TcMYB30 | AtMYB93   | 48.04 | 102 | 52  | 1 | 40  | 342  | 14  | 115 | 2.00E-29  | 107  |
| TcMYB30 | MYB8      | 45.37 | 108 | 58  | 1 | 22  | 342  | 8   | 115 | 3.00E-29  | 103  |
| TcMYB30 | ATMYB3    | 47.22 | 108 | 56  | 1 | 22  | 342  | 8   | 115 | 3.00E-29  | 105  |
| TcMYB30 | ATMYB0    | 44.17 | 120 | 65  | 2 | 40  | 393  | 16  | 135 | 4.00E-29  | 104  |
| TcMYB30 | AtMYB83   | 50.47 | 107 | 52  | 1 | 40  | 357  | 32  | 138 | 4.00E-29  | 106  |
| TcMYB30 | ATMYB71   | 44.55 | 110 | 60  | 1 | 40  | 366  | 20  | 129 | 4.00E-29  | 105  |
| TcMYB30 | ATMYB102  | 50    | 102 | 50  | 1 | 40  | 342  | 14  | 115 | 5.00E-29  | 106  |
| TcMYB30 | ATMYB15   | 31.58 | 209 | 137 | 3 | 22  | 630  | 8   | 199 | 6.00E-29  | 105  |
| TcMYB30 | AtMYB32   | 41.72 | 151 | 87  | 2 | 40  | 489  | 14  | 155 | 7.00E-29  | 104  |
| TcMYB30 | AtMYB116  | 43.52 | 108 | 60  | 1 | 22  | 342  | 14  | 121 | 8.00E-29  | 104  |
| TcMYB30 | ATMYB67   | 49.02 | 102 | 51  | 1 | 40  | 342  | 24  | 125 | 9.00E-29  | 105  |
| TcMYB30 | ATMYB37   | 49.51 | 103 | 50  | 2 | 40  | 342  | 14  | 116 | 9.00E-29  | 105  |
| TcMYB30 | AtMYB36   | 47.57 | 103 | 52  | 2 | 40  | 342  | 14  | 116 | 1.00E-28  | 105  |
| TcMYB30 | ATMYB65   | 47.06 | 102 | 53  | 1 | 40  | 342  | 43  | 144 | 1.00E-28  | 107  |
| TcMYB30 | ATMYB38   | 49.51 | 103 | 50  | 2 | 40  | 342  | 14  | 116 | 1.00E-28  | 104  |
| TcMYB30 | AtMYB18   | 46.09 | 115 | 61  | 2 | 1   | 342  | 1   | 113 | 2.00E-28  | 103  |
| TcMYB30 | ATMYB87   | 45.95 | 111 | 58  | 2 | 40  | 366  | 14  | 124 | 2.00E-28  | 104  |
| TcMYB30 | ATMYB123  | 48.15 | 108 | 55  | 2 | 22  | 342  | 12  | 117 | 2.00E-28  | 103  |
| TcMYB30 | ATMYB61   | 35.09 | 171 | 110 | 2 | 40  | 549  | 14  | 179 | 2.00E-28  | 105  |
| TcMYB30 | MYB7      | 49.02 | 102 | 51  | 1 | 40  | 342  | 14  | 115 | 2.00E-28  | 103  |
| TcMYB30 | AtMYB103  | 50    | 102 | 50  | 1 | 40  | 342  | 14  | 115 | 2.00E-28  | 105  |
| TcMYB30 | ATMYB120  | 49.5  | 101 | 50  | 1 | 40  | 339  | 28  | 128 | 2.00E-28  | 106  |
| TcMYB30 | ATMYB2    | 44.35 | 115 | 63  | 2 | 22  | 363  | 16  | 129 | 2.00E-28  | 103  |
| TcMYB30 | ATMYB58   | 33.5  | 206 | 133 | 4 | 40  | 645  | 16  | 189 | 5.00E-28  | 102  |
| TcMYB30 | AtMYB27   | 45.63 | 103 | 54  | 2 | 40  | 342  | 11  | 112 | 6.00E-28  | 101  |
| TcMYB30 | ATMYB33   | 47.06 | 102 | 53  | 1 | 40  | 342  | 34  | 135 | 1.00E-27  | 104  |
| TcMYB30 | AtMYB81   | 48.51 | 101 | 51  | 1 | 40  | 339  | 22  | 122 | 1.00E-27  | 103  |
| TcMYB30 | ATMYB11   | 48.15 | 108 | 55  | 1 | 22  | 342  | 8   | 115 | 2.00E-27  | 102  |
| TcMYB30 | ATMYB68   | 47.57 | 103 | 52  | 2 | 40  | 342  | 14  | 116 | 2.00E-27  | 102  |
| TcMYB30 | ATMYB86   | 49.02 | 102 | 51  | 1 | 40  | 342  | 14  | 115 | 2.00E-27  | 102  |
| TcMYB30 | AtMYB10   | 46.6  | 103 | 53  | 2 | 40  | 342  | 16  | 117 | 2.00E-27  | 99.8 |
| TcMYB30 | ATMYB84   | 46.6  | 103 | 53  | 2 | 40  | 342  | 14  | 116 | 2.00E-27  | 101  |
| TcMYB30 | ATMYB3    | 43.12 | 109 | 61  | 1 | 16  | 339  | 14  | 122 | 3.00E-27  | 99.4 |
| TcMYB30 | ATMYB55   | 37.65 | 162 | 77  | 4 | 40  | 453  | 14  | 171 | 3.00E-27  | 101  |
| TcMYB30 | AtMYB19   | 45.61 | 114 | 58  | 3 | 13  | 342  | 3   | 115 | 3.00E-27  | 100  |
| TcMYB30 | AtMYB24   | 44.55 | 101 | 55  | 1 | 40  | 339  | 19  | 119 | 5.00E-27  | 98.2 |
| TcMYB30 | ATMYB28   | 48.04 | 102 | 52  | 1 | 40  | 342  | 14  | 115 | 5.00E-27  | 101  |
| TcMYB30 | ATMYB5    | 47.06 | 102 | 53  | 1 | 40  | 342  | 25  | 126 | 6.00E-27  | 99   |
| TcMYB30 | AtMYB50   | 47.06 | 102 | 53  | 1 | 40  | 342  | 14  | 115 | 7.00E-27  | 100  |
| TcMYB30 | ATMYB12   | 33.83 | 201 | 112 | 5 | 22  | 561  | 8   | 207 | 8.00E-27  | 100  |
| TcMYB30 | ATMYB57   | 46.53 | 101 | 53  | 1 | 40  | 339  | 27  | 127 | 9.00E-27  | 97.4 |
| TcMYB30 | ATMYB111  | 47.22 | 108 | 56  | 1 | 22  | 342  | 8   | 115 | 1.00E-26  | 99.8 |
| TcMYB30 | AtMYB76   | 47.06 | 102 | 53  | 1 | 40  | 342  | 14  | 115 | 2.00E-26  | 99.4 |
| TcMYB30 | AtMYB100  | 41.51 | 106 | 61  | 3 | 25  | 339  | 23  | 125 | 2.00E-26  | 97.1 |
| TcMYB30 | ATMYB29   | 47.52 | 101 | 52  | 1 | 40  | 339  | 14  | 114 | 3.00E-26  | 99   |
| TcMYB30 | AtMYB112  | 41.51 | 106 | 61  | 1 | 25  | 339  | 29  | 134 | 3.00E-26  | 97.1 |
| TcMYB30 | AtMYB40   | 38.17 | 131 | 72  | 3 | 40  | 405  | 14  | 143 | 3.00E-26  | 97.4 |
| TcMYB30 | AtMYB108  | 42.99 | 107 | 60  | 1 | 22  | 339  | 15  | 121 | 3.00E-26  | 98.6 |
| TcMYB30 | AtMYB104  | 45.1  | 102 | 54  | 2 | 40  | 339  | 18  | 118 | 3.00E-26  | 99.4 |
| TcMYB30 | AtMYB20   | 38.64 | 132 | 72  | 3 | 22  | 390  | 8   | 138 | 2.00E-25  | 95.5 |
| TcMYB30 | AtMYB114  | 41.18 | 102 | 59  | 1 | 40  | 342  | 10  | 111 | 9.00E-25  | 90.1 |
| TcMYB30 | AtMYB42   | 44.12 | 102 | 56  | 1 | 40  | 342  | 14  | 115 | 2.00E-24  | 92.8 |
| TcMYB30 | AtMYB85   | 44.12 | 102 | 56  | 1 | 40  | 342  | 14  | 115 | 8.00E-24  | 90.9 |
| TcMYB30 | ATMYB75   | 37.29 | 118 | 73  | 2 | 40  | 390  | 10  | 124 | 1.00E-23  | 90.1 |
| TcMYB30 | AtMYB43   | 41.28 | 109 | 62  | 2 | 22  | 342  | 8   | 115 | 4.00E-23  | 90.1 |
| TcMYB30 | ATMYB78   | 37.1  | 124 | 63  | 2 | 13  | 339  | 19  | 142 | 9.00E-23  | 89   |
| TcMYB30 | ATMYB88   | 36.89 | 103 | 65  | 0 | 49  | 357  | 33  | 135 | 1.00E-22  | 89.7 |
| TcMYB30 | ATMYB88   | 30.16 | 63  | 44  | 1 | 40  | 228  | 82  | 143 | 2.00E-05  | 37.7 |
| TcMYB30 | ATMYB90   | 40.2  | 102 | 60  | 1 | 40  | 342  | 10  | 111 | 2.00E-22  | 86.7 |
| TcMYB30 | AtMYB22   | 33.77 | 151 | 86  | 4 | 31  | 441  | 51  | 199 | 2.00E-22  | 86.7 |
| TcMYB30 | ATMYB99   | 41.74 | 115 | 59  | 2 | 22  | 342  | 9   | 123 | 3.00E-22  | 86.3 |
| TcMYB30 | AtMYB113  | 39.62 | 106 | 59  | 2 | 40  | 342  | 10  | 111 | 3.00E-22  | 86.3 |
| TcMYB30 | AtMYB124  | 33.33 | 123 | 82  | 1 | 49  | 417  | 28  | 143 | 6.00E-22  | 87.8 |
| TcMYB30 | AtMYB124  | 30.56 | 72  | 50  | 1 | 40  | 255  | 77  | 147 | 5.00E-06  | 39.7 |
| TcMYB30 | ATMYB91   | 29.2  | 226 | 155 | 4 | 49  | 711  | 7   | 216 | 1.00E-21  | 86.3 |
| TcMYB31 | ATMYB91   | 45.15 | 392 | 212 | 9 | 1   | 1167 | 1   | 358 | 6.00E-109 | 318  |
| TcMYB31 | ATMYB48   | 28.87 | 239 | 141 | 6 | 19  | 648  | 12  | 242 | 5.00E-29  | 106  |
| TcMYB31 | AtMYB82   | 41.23 | 114 | 67  | 1 | 7   | 348  | 13  | 124 | 8.00E-29  | 104  |
| TcMYB31 | ATMYB120  | 31.09 | 238 | 145 | 4 | 19  | 675  | 31  | 260 | 2.00E-28  | 109  |
| TcMYB31 | ATMYB120  | 29.05 | 148 | 92  | 4 | 322 | 726  | 229 | 375 | 7.00E-06  | 40   |
| TcMYB31 | ATMYB59-3 | 42.24 | 116 | 66  | 2 | 19  | 363  | 13  | 126 | 2.00E-28  | 104  |
| TcMYB31 | AtMYB97   | 32.08 | 240 | 149 | 5 | 19  | 696  | 24  | 234 | 5.00E-28  | 106  |

|         |          |       |     |     |    |     |     |     |     |          |      |
|---------|----------|-------|-----|-----|----|-----|-----|-----|-----|----------|------|
| TcMYB31 | ATMYB57  | 38.46 | 130 | 71  | 2  | 19  | 381 | 30  | 157 | 8.00E-28 | 102  |
| TcMYB31 | AtMYB79  | 36.17 | 141 | 90  | 2  | 19  | 441 | 11  | 145 | 4.00E-27 | 101  |
| TcMYB31 | AtMYB116 | 41.96 | 112 | 65  | 1  | 19  | 354 | 23  | 132 | 6.00E-27 | 101  |
| TcMYB31 | ATMYB96  | 28.24 | 255 | 175 | 6  | 19  | 759 | 17  | 264 | 9.00E-27 | 102  |
| TcMYB31 | ATMYB63  | 38.97 | 136 | 77  | 4  | 7   | 396 | 15  | 148 | 2.00E-26 | 100  |
| TcMYB31 | AtMYB76  | 36.25 | 160 | 102 | 2  | 19  | 498 | 17  | 172 | 2.00E-26 | 101  |
| TcMYB31 | ATMYB101 | 42.72 | 103 | 59  | 1  | 19  | 327 | 23  | 123 | 3.00E-26 | 102  |
| TcMYB31 | AtMYB19  | 39.52 | 124 | 72  | 2  | 4   | 366 | 9   | 130 | 3.00E-26 | 99.4 |
| TcMYB31 | AtMYB51  | 30.04 | 273 | 181 | 9  | 19  | 807 | 18  | 271 | 3.00E-26 | 100  |
| TcMYB31 | ATMYB30  | 27.24 | 257 | 181 | 4  | 19  | 771 | 17  | 247 | 4.00E-26 | 100  |
| TcMYB31 | ATMYB80  | 40.95 | 105 | 62  | 1  | 7   | 321 | 13  | 115 | 5.00E-26 | 99.8 |
| TcMYB31 | ATMYB121 | 37.72 | 114 | 71  | 1  | 19  | 360 | 32  | 143 | 7.00E-26 | 98.6 |
| TcMYB31 | ATMYB66  | 37.19 | 121 | 76  | 1  | 19  | 381 | 21  | 139 | 7.00E-26 | 96.7 |
| TcMYB31 | AtMYB45  | 38.58 | 127 | 74  | 3  | 4   | 372 | 15  | 139 | 9.00E-26 | 97.8 |
| TcMYB31 | AtMYB60  | 38.66 | 119 | 73  | 1  | 19  | 375 | 17  | 133 | 1.00E-25 | 98.2 |
| TcMYB31 | ATMYB75  | 35.33 | 167 | 101 | 5  | 19  | 498 | 13  | 171 | 1.00E-25 | 97.1 |
| TcMYB31 | AtMYB62  | 36.05 | 147 | 89  | 3  | 10  | 435 | 21  | 156 | 1.00E-25 | 97.8 |
| TcMYB31 | ATMYB71  | 40.57 | 106 | 63  | 1  | 19  | 336 | 23  | 126 | 2.00E-25 | 97.4 |
| TcMYB31 | ATMYB37  | 37.97 | 158 | 89  | 3  | 7   | 453 | 13  | 169 | 2.00E-25 | 98.6 |
| TcMYB31 | AtMYB81  | 30.85 | 201 | 120 | 4  | 19  | 564 | 25  | 223 | 2.00E-25 | 99.8 |
| TcMYB31 | AtMYB50  | 32.38 | 210 | 114 | 6  | 19  | 564 | 17  | 224 | 2.00E-25 | 97.8 |
| TcMYB31 | AtMYB24  | 35.07 | 134 | 85  | 2  | 19  | 414 | 22  | 153 | 3.00E-25 | 95.1 |
| TcMYB31 | ATMYB90  | 39.83 | 118 | 71  | 1  | 19  | 372 | 13  | 128 | 4.00E-25 | 95.9 |
| TcMYB31 | ATMYB0   | 32.9  | 155 | 94  | 2  | 19  | 453 | 19  | 171 | 5.00E-25 | 95.1 |
| TcMYB31 | ATMYB65  | 41.75 | 103 | 60  | 1  | 19  | 327 | 46  | 146 | 5.00E-25 | 99.4 |
| TcMYB31 | AtMYB27  | 41.51 | 106 | 62  | 1  | 10  | 327 | 11  | 114 | 6.00E-25 | 95.1 |
| TcMYB31 | ATMYB94  | 25.71 | 319 | 208 | 8  | 19  | 888 | 17  | 317 | 6.00E-25 | 97.1 |
| TcMYB31 | ATMYB33  | 41.75 | 103 | 60  | 1  | 19  | 327 | 37  | 137 | 6.00E-25 | 99   |
| TcMYB31 | AtMYB114 | 39.67 | 121 | 73  | 2  | 19  | 381 | 13  | 130 | 7.00E-25 | 92   |
| TcMYB31 | AtMYB112 | 39.62 | 106 | 64  | 1  | 10  | 327 | 34  | 137 | 9.00E-25 | 94.7 |
| TcMYB31 | ATMYB84  | 33.33 | 165 | 105 | 4  | 19  | 498 | 17  | 178 | 1.00E-24 | 95.9 |
| TcMYB31 | AtMYB36  | 34.09 | 176 | 115 | 4  | 19  | 543 | 17  | 178 | 1.00E-24 | 96.3 |
| TcMYB31 | ATMYB31  | 31.67 | 240 | 151 | 10 | 19  | 699 | 17  | 239 | 1.00E-24 | 95.9 |
| TcMYB31 | ATMYB3   | 38.53 | 109 | 67  | 1  | 19  | 345 | 25  | 131 | 2.00E-24 | 93.6 |
| TcMYB31 | ATMYB14  | 34.69 | 147 | 90  | 3  | 7   | 429 | 13  | 155 | 2.00E-24 | 94   |
| TcMYB31 | AtMYB74  | 32.04 | 181 | 107 | 3  | 19  | 513 | 18  | 196 | 2.00E-24 | 95.1 |
| TcMYB31 | ATMYB102 | 33.14 | 175 | 82  | 3  | 19  | 438 | 17  | 189 | 3.00E-24 | 95.5 |
| TcMYB31 | AtMYB17  | 44.55 | 101 | 56  | 1  | 19  | 321 | 17  | 115 | 3.00E-24 | 94.4 |
| TcMYB31 | ATMYB3   | 34.85 | 132 | 83  | 2  | 19  | 405 | 17  | 146 | 4.00E-24 | 93.2 |
| TcMYB31 | ATMYB123 | 38.02 | 121 | 72  | 2  | 10  | 363 | 16  | 134 | 4.00E-24 | 93.2 |
| TcMYB31 | AtMYB103 | 37.7  | 122 | 76  | 1  | 7   | 372 | 13  | 132 | 4.00E-24 | 95.1 |
| TcMYB31 | ATMYB2   | 38.83 | 103 | 63  | 1  | 19  | 327 | 25  | 125 | 5.00E-24 | 93.2 |
| TcMYB31 | ATMYB119 | 37.07 | 116 | 73  | 1  | 16  | 363 | 107 | 219 | 5.00E-24 | 95.5 |
| TcMYB31 | ATMYB119 | 29.49 | 78  | 51  | 2  | 175 | 396 | 105 | 182 | 6.00E-04 | 33.9 |
| TcMYB31 | ATMYB86  | 27.65 | 217 | 155 | 3  | 19  | 663 | 17  | 227 | 7.00E-24 | 94.4 |
| TcMYB31 | AtMYB53  | 41.58 | 101 | 59  | 1  | 19  | 321 | 17  | 115 | 7.00E-24 | 93.6 |
| TcMYB31 | AtMYB113 | 39.83 | 118 | 71  | 1  | 19  | 372 | 13  | 128 | 8.00E-24 | 92   |
| TcMYB31 | ATMYB67  | 28.57 | 203 | 133 | 5  | 7   | 579 | 23  | 207 | 9.00E-24 | 93.2 |
| TcMYB31 | ATMYB92  | 26.58 | 237 | 173 | 3  | 19  | 726 | 17  | 247 | 1.00E-23 | 93.6 |
| TcMYB31 | AtMYB98  | 42.86 | 105 | 60  | 1  | 16  | 330 | 219 | 320 | 1.00E-23 | 94.7 |
| TcMYB31 | AtMYB98  | 32.38 | 105 | 70  | 2  | 25  | 336 | 169 | 271 | 8.00E-10 | 52.4 |
| TcMYB31 | ATMYB61  | 28.47 | 281 | 191 | 8  | 19  | 831 | 17  | 284 | 1.00E-23 | 94   |
| TcMYB31 | ATMYB28  | 34.16 | 161 | 101 | 3  | 19  | 486 | 17  | 168 | 1.00E-23 | 94   |
| TcMYB31 | ATMYB55  | 38.76 | 129 | 69  | 2  | 19  | 375 | 17  | 143 | 1.00E-23 | 93.6 |
| TcMYB31 | AtMYB18  | 35.77 | 137 | 77  | 3  | 7   | 384 | 8   | 142 | 1.00E-23 | 92.4 |
| TcMYB31 | ATMYB5   | 33.58 | 137 | 81  | 3  | 7   | 387 | 24  | 158 | 1.00E-23 | 91.7 |
| TcMYB31 | ATMYB26  | 28.17 | 252 | 169 | 7  | 7   | 726 | 13  | 243 | 1.00E-23 | 93.6 |
| TcMYB31 | ATMYB38  | 28.31 | 219 | 148 | 3  | 7   | 636 | 13  | 230 | 1.00E-23 | 92.4 |
| TcMYB31 | AtMYB41  | 39.66 | 116 | 70  | 1  | 19  | 366 | 17  | 130 | 2.00E-23 | 92   |
| TcMYB31 | AtMYB104 | 39.25 | 107 | 65  | 1  | 10  | 330 | 18  | 122 | 2.00E-23 | 93.6 |
| TcMYB31 | ATMYB23  | 38.61 | 101 | 62  | 1  | 19  | 321 | 17  | 115 | 2.00E-23 | 90.5 |
| TcMYB31 | AtMYB107 | 39.6  | 101 | 61  | 1  | 19  | 321 | 17  | 115 | 2.00E-23 | 92.4 |
| TcMYB31 | ATMYB46  | 41.03 | 117 | 67  | 2  | 19  | 363 | 23  | 137 | 2.00E-23 | 91.7 |
| TcMYB31 | AtMYB108 | 38.89 | 108 | 66  | 1  | 7   | 330 | 20  | 125 | 2.00E-23 | 92.4 |
| TcMYB31 | ATMYB122 | 38.4  | 125 | 77  | 1  | 19  | 393 | 17  | 139 | 2.00E-23 | 92.4 |
| TcMYB31 | ATMYB15  | 40    | 105 | 63  | 1  | 7   | 321 | 13  | 115 | 3.00E-23 | 91.3 |
| TcMYB31 | AtMYB64  | 40    | 105 | 63  | 1  | 16  | 330 | 107 | 208 | 4.00E-23 | 92.8 |
| TcMYB31 | AtMYB64  | 28.57 | 70  | 49  | 1  | 130 | 336 | 90  | 159 | 2.00E-04 | 35.4 |
| TcMYB31 | AtMYB9   | 39.6  | 101 | 61  | 1  | 19  | 321 | 17  | 115 | 5.00E-23 | 91.7 |
| TcMYB31 | MYB8     | 31.45 | 124 | 85  | 1  | 19  | 390 | 17  | 138 | 5.00E-23 | 89   |
| TcMYB31 | AtMYB49  | 40.59 | 101 | 60  | 1  | 19  | 321 | 17  | 115 | 7.00E-23 | 90.9 |
| TcMYB31 | AtMYB10  | 38.89 | 108 | 66  | 1  | 7   | 330 | 15  | 120 | 9.00E-23 | 89   |
| TcMYB31 | ATMYB16  | 37.5  | 112 | 70  | 1  | 19  | 354 | 17  | 126 | 1.00E-22 | 90.1 |
| TcMYB31 | ATMYB29  | 35.15 | 165 | 107 | 4  | 19  | 513 | 17  | 161 | 2.00E-22 | 90.1 |
| TcMYB31 | ATMYB34  | 40.18 | 112 | 67  | 1  | 19  | 354 | 17  | 126 | 2.00E-22 | 89.4 |
| TcMYB31 | ATMYB106 | 37.5  | 112 | 70  | 1  | 19  | 354 | 60  | 169 | 2.00E-22 | 90.5 |
| TcMYB31 | AtMYB93  | 40.59 | 101 | 60  | 1  | 19  | 321 | 17  | 115 | 2.00E-22 | 90.1 |
| TcMYB31 | ATMYB58  | 37.27 | 110 | 69  | 1  | 7   | 336 | 15  | 122 | 2.00E-22 | 88.6 |
| TcMYB31 | ATMYB95  | 37.29 | 118 | 74  | 1  | 19  | 372 | 17  | 132 | 4.00E-22 | 87.8 |
| TcMYB31 | ATMYB4   | 42.27 | 97  | 56  | 1  | 19  | 309 | 17  | 111 | 5.00E-22 | 87.8 |

|         |          |       |     |     |   |    |      |     |     |          |      |
|---------|----------|-------|-----|-----|---|----|------|-----|-----|----------|------|
| TcMYB31 | ATMYB118 | 37.04 | 108 | 68  | 1 | 16 | 339  | 191 | 295 | 5.00E-22 | 89.7 |
| TcMYB31 | AtMYB42  | 38.98 | 118 | 72  | 1 | 1  | 354  | 11  | 126 | 1.00E-21 | 87   |
| TcMYB31 | ATMYB12  | 37.14 | 105 | 66  | 1 | 7  | 321  | 13  | 115 | 1.00E-21 | 88.2 |
| TcMYB31 | AtMYB32  | 36.61 | 112 | 71  | 1 | 19 | 354  | 17  | 126 | 1.00E-21 | 86.7 |
| TcMYB31 | AtMYB85  | 40.18 | 112 | 67  | 1 | 19 | 354  | 17  | 126 | 1.00E-21 | 86.3 |
| TcMYB31 | MYB7     | 36.61 | 112 | 71  | 1 | 19 | 354  | 17  | 126 | 1.00E-21 | 86.3 |
| TcMYB31 | ATMYB72  | 33.61 | 119 | 79  | 1 | 7  | 363  | 15  | 131 | 2.00E-21 | 86.7 |
| TcMYB31 | ATMYB68  | 38.79 | 116 | 66  | 3 | 19 | 351  | 17  | 130 | 3.00E-21 | 87   |
| TcMYB31 | AtMYB20  | 36.97 | 119 | 75  | 1 | 19 | 375  | 17  | 133 | 3.00E-21 | 85.5 |
| TcMYB31 | ATMYB105 | 30    | 180 | 120 | 4 | 10 | 531  | 107 | 263 | 6.00E-21 | 85.5 |
| TcMYB31 | ATMYB87  | 38.24 | 102 | 62  | 2 | 19 | 321  | 17  | 116 | 6.00E-21 | 85.1 |
| TcMYB31 | AtMYB56  | 38.32 | 107 | 66  | 1 | 10 | 330  | 93  | 196 | 7.00E-21 | 85.1 |
| TcMYB31 | AtMYB47  | 36.44 | 118 | 75  | 2 | 1  | 354  | 12  | 126 | 9.00E-21 | 84   |
| TcMYB31 | AtMYB83  | 35.65 | 115 | 74  | 1 | 19 | 363  | 35  | 147 | 9.00E-21 | 85.1 |
| TcMYB31 | AtMYB6   | 33.93 | 112 | 74  | 1 | 19 | 354  | 17  | 126 | 1.00E-20 | 83.2 |
| TcMYB31 | AtMYB117 | 28.33 | 180 | 129 | 2 | 10 | 549  | 98  | 272 | 1.00E-20 | 85.1 |
| TcMYB31 | ATMYB35  | 36.36 | 121 | 75  | 2 | 19 | 375  | 17  | 135 | 1.00E-20 | 84.3 |
| TcMYB31 | ATMYB13  | 34.29 | 140 | 92  | 3 | 19 | 438  | 17  | 143 | 2.00E-20 | 82.8 |
| TcMYB31 | AtMYB115 | 38.61 | 101 | 62  | 1 | 16 | 318  | 160 | 257 | 2.00E-20 | 84.3 |
| TcMYB31 | ATMYB25  | 42.42 | 99  | 57  | 1 | 4  | 300  | 48  | 143 | 3.00E-20 | 84   |
| TcMYB31 | ATMYB52  | 33.62 | 116 | 77  | 1 | 1  | 348  | 2   | 114 | 3.00E-20 | 82   |
| TcMYB31 | ATMYB69  | 33.61 | 119 | 79  | 1 | 7  | 363  | 18  | 133 | 3.00E-20 | 82   |
| TcMYB31 | AtMYB43  | 39.29 | 112 | 68  | 1 | 19 | 354  | 17  | 126 | 5.00E-20 | 82.8 |
| TcMYB31 | ATMYB111 | 33.33 | 105 | 70  | 1 | 7  | 321  | 13  | 115 | 6.00E-20 | 82.8 |
| TcMYB31 | ATMYB11  | 34.29 | 105 | 69  | 1 | 7  | 321  | 13  | 115 | 8.00E-20 | 82.4 |
| TcMYB31 | ATMYB73  | 40.43 | 94  | 56  | 1 | 19 | 300  | 16  | 106 | 8.00E-20 | 82   |
| TcMYB31 | ATMYB78  | 33.88 | 121 | 66  | 2 | 10 | 330  | 28  | 146 | 8.00E-20 | 82   |
| TcMYB31 | ATMYB110 | 33.33 | 129 | 86  | 1 | 10 | 396  | 67  | 192 | 2.00E-19 | 80.9 |
| TcMYB31 | ATMYB54  | 33.63 | 113 | 75  | 1 | 1  | 339  | 3   | 112 | 2.00E-19 | 79.3 |
| TcMYB31 | AtMYB70  | 39.81 | 103 | 58  | 2 | 4  | 300  | 7   | 106 | 2.00E-19 | 80.5 |
| TcMYB31 | AtMYB109 | 32.84 | 134 | 90  | 1 | 4  | 405  | 54  | 184 | 4.00E-19 | 80.9 |
| TcMYB31 | ATMYB99  | 37.74 | 106 | 61  | 1 | 19 | 321  | 18  | 123 | 5.00E-19 | 78.6 |
| TcMYB31 | ATMYB44  | 27.35 | 234 | 164 | 5 | 19 | 702  | 9   | 221 | 2.00E-18 | 77.8 |
| TcMYB31 | AtMYB1   | 39.36 | 94  | 57  | 1 | 19 | 300  | 58  | 148 | 3.00E-18 | 78.2 |
| TcMYB31 | ATMYB77  | 22.65 | 287 | 218 | 4 | 19 | 867  | 9   | 265 | 3.00E-18 | 77   |
| TcMYB31 | AtMYB40  | 33.62 | 116 | 77  | 1 | 7  | 354  | 13  | 126 | 7.00E-18 | 75.5 |
| TcMYB31 | AtMYB100 | 27.52 | 149 | 108 | 2 | 7  | 453  | 25  | 167 | 2.00E-17 | 73.9 |
| TcMYB31 | ATMYB88  | 29.77 | 131 | 88  | 2 | 4  | 384  | 24  | 151 | 2.00E-16 | 72.8 |
| TcMYB31 | AtMYB22  | 30    | 120 | 84  | 2 | 10 | 369  | 54  | 169 | 8.00E-16 | 69.3 |
| TcMYB31 | AtMYB124 | 28.12 | 128 | 86  | 3 | 4  | 369  | 19  | 143 | 9.00E-15 | 67.8 |
| TcMYB31 | AtMYB89  | 32.98 | 94  | 63  | 1 | 19 | 300  | 59  | 149 | 1.00E-13 | 62   |
| TcMYB32 | ATMYB14  | 81.9  | 116 | 21  | 0 | 1  | 348  | 1   | 116 | 1.00E-71 | 219  |
| TcMYB32 | AtMYB107 | 74.4  | 125 | 32  | 0 | 1  | 375  | 1   | 125 | 2.00E-70 | 218  |
| TcMYB32 | AtMYB9   | 75.2  | 125 | 31  | 0 | 1  | 375  | 1   | 125 | 1.00E-69 | 216  |
| TcMYB32 | ATMYB15  | 81.03 | 116 | 22  | 0 | 1  | 348  | 1   | 116 | 2.00E-69 | 214  |
| TcMYB32 | ATMYB13  | 54.9  | 204 | 81  | 4 | 1  | 579  | 1   | 192 | 8.00E-69 | 211  |
| TcMYB32 | AtMYB85  | 62.5  | 160 | 59  | 2 | 1  | 477  | 1   | 158 | 2.00E-68 | 211  |
| TcMYB32 | ATMYB102 | 37.32 | 343 | 213 | 8 | 1  | 1023 | 1   | 316 | 3.00E-68 | 213  |
| TcMYB32 | AtMYB17  | 70.15 | 134 | 40  | 0 | 1  | 402  | 1   | 134 | 4.00E-68 | 211  |
| TcMYB32 | AtMYB42  | 57.14 | 182 | 74  | 1 | 1  | 534  | 1   | 182 | 6.00E-68 | 211  |
| TcMYB32 | AtMYB93  | 45.56 | 259 | 127 | 5 | 1  | 735  | 1   | 252 | 7.00E-68 | 213  |
| TcMYB32 | AtMYB41  | 74.4  | 125 | 32  | 0 | 1  | 375  | 1   | 125 | 1.00E-67 | 210  |
| TcMYB32 | AtMYB74  | 72.66 | 128 | 34  | 1 | 1  | 381  | 1   | 128 | 3.00E-67 | 210  |
| TcMYB32 | ATMYB16  | 68.12 | 138 | 44  | 0 | 1  | 414  | 1   | 138 | 4.00E-67 | 210  |
| TcMYB32 | ATMYB58  | 78.26 | 115 | 25  | 0 | 4  | 348  | 4   | 118 | 3.00E-66 | 206  |
| TcMYB32 | ATMYB92  | 50.7  | 213 | 87  | 4 | 1  | 585  | 1   | 207 | 5.00E-65 | 204  |
| TcMYB32 | ATMYB106 | 68.89 | 135 | 37  | 1 | 10 | 399  | 47  | 181 | 2.00E-64 | 205  |
| TcMYB32 | AtMYB43  | 72.8  | 125 | 34  | 0 | 1  | 375  | 1   | 125 | 2.00E-64 | 203  |
| TcMYB32 | AtMYB53  | 56.07 | 173 | 66  | 2 | 1  | 489  | 1   | 173 | 4.00E-64 | 201  |
| TcMYB32 | ATMYB72  | 69.23 | 130 | 40  | 1 | 4  | 393  | 4   | 128 | 4.00E-63 | 198  |
| TcMYB32 | ATMYB5   | 69.42 | 121 | 37  | 0 | 13 | 375  | 16  | 136 | 6.00E-63 | 196  |
| TcMYB32 | AtMYB20  | 69.6  | 125 | 38  | 0 | 1  | 375  | 1   | 125 | 8.00E-63 | 197  |
| TcMYB32 | AtMYB10  | 68.5  | 127 | 40  | 0 | 7  | 387  | 5   | 131 | 2.00E-62 | 195  |
| TcMYB32 | ATMYB63  | 74.78 | 115 | 29  | 0 | 4  | 348  | 4   | 118 | 6.00E-62 | 195  |
| TcMYB32 | AtMYB6   | 66.4  | 125 | 42  | 0 | 1  | 375  | 1   | 125 | 1.00E-61 | 192  |
| TcMYB32 | MYB8     | 64    | 125 | 45  | 0 | 1  | 375  | 1   | 125 | 3.00E-61 | 191  |
| TcMYB32 | ATMYB3   | 64.06 | 128 | 46  | 0 | 1  | 384  | 1   | 128 | 9.00E-61 | 191  |
| TcMYB32 | AtMYB49  | 56.55 | 168 | 72  | 2 | 1  | 501  | 1   | 166 | 1.00E-60 | 193  |
| TcMYB32 | MYB7     | 64.8  | 125 | 44  | 0 | 1  | 375  | 1   | 125 | 4.00E-60 | 190  |
| TcMYB32 | ATMYB4   | 64.8  | 125 | 44  | 0 | 1  | 375  | 1   | 125 | 5.00E-60 | 190  |
| TcMYB32 | AtMYB32  | 65.6  | 125 | 43  | 0 | 1  | 375  | 1   | 125 | 6.00E-60 | 189  |
| TcMYB32 | ATMYB28  | 53.23 | 186 | 78  | 3 | 1  | 531  | 1   | 183 | 7.00E-60 | 192  |
| TcMYB32 | ATMYB12  | 68.1  | 116 | 37  | 0 | 1  | 348  | 1   | 116 | 2.00E-58 | 188  |
| TcMYB32 | AtMYB51  | 65.08 | 126 | 43  | 1 | 1  | 375  | 1   | 126 | 5.00E-58 | 187  |
| TcMYB32 | ATMYB11  | 68.1  | 116 | 37  | 0 | 1  | 348  | 1   | 116 | 6.00E-58 | 186  |
| TcMYB32 | AtMYB60  | 65.57 | 122 | 42  | 0 | 1  | 366  | 1   | 122 | 8.00E-58 | 184  |
| TcMYB32 | AtMYB40  | 64.8  | 125 | 44  | 0 | 1  | 375  | 1   | 125 | 2.00E-57 | 182  |
| TcMYB32 | ATMYB111 | 66.38 | 116 | 39  | 0 | 1  | 348  | 1   | 116 | 2.00E-57 | 185  |
| TcMYB32 | ATMYB34  | 64.8  | 125 | 44  | 0 | 1  | 375  | 1   | 125 | 2.00E-57 | 183  |
| TcMYB32 | ATMYB94  | 68.07 | 119 | 38  | 0 | 1  | 357  | 1   | 119 | 3.00E-57 | 184  |

|         |           |       |     |     |   |     |     |     |     |          |      |
|---------|-----------|-------|-----|-----|---|-----|-----|-----|-----|----------|------|
| TcMYB32 | ATMYB30   | 52.05 | 171 | 78  | 1 | 1   | 501 | 1   | 171 | 4.00E-57 | 184  |
| TcMYB32 | ATMYB99   | 61.83 | 131 | 43  | 1 | 4   | 375 | 3   | 133 | 5.00E-57 | 181  |
| TcMYB32 | ATMYB31   | 67.5  | 120 | 39  | 0 | 1   | 360 | 1   | 120 | 5.00E-57 | 184  |
| TcMYB32 | ATMYB80   | 64    | 125 | 45  | 0 | 1   | 375 | 1   | 125 | 5.00E-57 | 183  |
| TcMYB32 | ATMYB122  | 64    | 125 | 45  | 0 | 1   | 375 | 1   | 125 | 1.00E-56 | 182  |
| TcMYB32 | ATMYB29   | 50    | 188 | 94  | 1 | 1   | 564 | 1   | 176 | 1.00E-56 | 182  |
| TcMYB32 | ATMYB96   | 66.39 | 119 | 40  | 0 | 1   | 357 | 1   | 119 | 3.00E-56 | 182  |
| TcMYB32 | AtMYB76   | 65.6  | 125 | 43  | 0 | 1   | 375 | 1   | 125 | 4.00E-56 | 181  |
| TcMYB32 | ATMYB86   | 65.6  | 125 | 43  | 0 | 1   | 375 | 1   | 125 | 9.00E-56 | 181  |
| TcMYB32 | ATMYB35   | 61.6  | 125 | 48  | 0 | 1   | 375 | 1   | 125 | 2.00E-55 | 179  |
| TcMYB32 | ATMYB61   | 63.2  | 125 | 46  | 0 | 1   | 375 | 1   | 125 | 1.00E-54 | 178  |
| TcMYB32 | AtMYB50   | 60.8  | 125 | 49  | 0 | 1   | 375 | 1   | 125 | 1.00E-53 | 174  |
| TcMYB32 | ATMYB37   | 55.03 | 149 | 66  | 2 | 1   | 444 | 1   | 148 | 1.00E-52 | 172  |
| TcMYB32 | ATMYB95   | 51.92 | 156 | 75  | 0 | 1   | 468 | 1   | 156 | 1.00E-52 | 170  |
| TcMYB32 | ATMYB55   | 40.16 | 244 | 129 | 5 | 1   | 681 | 1   | 237 | 1.00E-52 | 172  |
| TcMYB32 | ATMYB67   | 53.96 | 139 | 64  | 0 | 16  | 432 | 16  | 154 | 2.00E-52 | 171  |
| TcMYB32 | AtMYB103  | 49.71 | 173 | 86  | 2 | 1   | 516 | 1   | 169 | 3.00E-52 | 172  |
| TcMYB32 | ATMYB87   | 63.56 | 118 | 42  | 1 | 1   | 351 | 1   | 118 | 5.00E-52 | 170  |
| TcMYB32 | ATMYB84   | 64.41 | 118 | 41  | 1 | 1   | 351 | 1   | 118 | 3.00E-51 | 168  |
| TcMYB32 | ATMYB68   | 65.25 | 118 | 40  | 1 | 1   | 351 | 1   | 118 | 4.00E-51 | 169  |
| TcMYB32 | AtMYB36   | 64.41 | 118 | 41  | 1 | 1   | 351 | 1   | 118 | 1.00E-50 | 167  |
| TcMYB32 | ATMYB38   | 56.43 | 140 | 53  | 2 | 1   | 396 | 1   | 140 | 6.00E-50 | 164  |
| TcMYB32 | ATMYB26   | 57.94 | 126 | 44  | 1 | 1   | 351 | 1   | 126 | 1.00E-49 | 165  |
| TcMYB32 | AtMYB47   | 58.4  | 125 | 52  | 0 | 1   | 375 | 1   | 125 | 2.00E-49 | 162  |
| TcMYB32 | ATMYB66   | 47.24 | 163 | 86  | 2 | 37  | 525 | 17  | 174 | 1.00E-47 | 155  |
| TcMYB32 | ATMYB123  | 67.62 | 105 | 34  | 0 | 34  | 348 | 14  | 118 | 1.00E-47 | 157  |
| TcMYB32 | AtMYB24   | 48.45 | 161 | 83  | 1 | 34  | 516 | 17  | 175 | 5.00E-47 | 154  |
| TcMYB32 | ATMYB23   | 60.58 | 104 | 41  | 0 | 37  | 348 | 13  | 116 | 9.00E-47 | 153  |
| TcMYB32 | ATMYB46   | 62.96 | 108 | 40  | 0 | 34  | 357 | 18  | 125 | 2.00E-46 | 154  |
| TcMYB32 | ATMYB101  | 60    | 105 | 42  | 0 | 31  | 345 | 17  | 121 | 7.00E-46 | 158  |
| TcMYB32 | AtMYB83   | 60.55 | 109 | 43  | 0 | 22  | 348 | 26  | 134 | 8.00E-46 | 154  |
| TcMYB32 | AtMYB82   | 60.75 | 107 | 42  | 0 | 25  | 345 | 9   | 115 | 1.00E-45 | 149  |
| TcMYB32 | AtMYB108  | 59.13 | 115 | 47  | 0 | 22  | 366 | 15  | 129 | 5.00E-45 | 152  |
| TcMYB32 | ATMYB3    | 56.52 | 115 | 50  | 0 | 34  | 378 | 20  | 134 | 8.00E-45 | 148  |
| TcMYB32 | ATMYB0    | 57.14 | 105 | 45  | 0 | 37  | 351 | 15  | 119 | 2.00E-44 | 147  |
| TcMYB32 | AtMYB79   | 58.41 | 113 | 47  | 1 | 37  | 375 | 7   | 114 | 8.00E-44 | 147  |
| TcMYB32 | AtMYB116  | 57.27 | 110 | 47  | 0 | 37  | 366 | 19  | 128 | 1.00E-43 | 147  |
| TcMYB32 | ATMYB71   | 59.05 | 105 | 43  | 0 | 31  | 345 | 17  | 121 | 1.00E-43 | 146  |
| TcMYB32 | AtMYB114  | 58.1  | 105 | 44  | 0 | 31  | 345 | 7   | 111 | 3.00E-43 | 141  |
| TcMYB32 | ATMYB33   | 57.41 | 108 | 46  | 0 | 22  | 345 | 28  | 135 | 3.00E-43 | 151  |
| TcMYB32 | AtMYB62   | 44.85 | 165 | 91  | 1 | 34  | 528 | 19  | 177 | 3.00E-43 | 146  |
| TcMYB32 | ATMYB48   | 50.78 | 128 | 61  | 1 | 31  | 408 | 6   | 133 | 8.00E-43 | 144  |
| TcMYB32 | ATMYB121  | 59.43 | 106 | 43  | 0 | 25  | 342 | 24  | 129 | 9.00E-43 | 144  |
| TcMYB32 | AtMYB112  | 57.66 | 111 | 47  | 0 | 34  | 366 | 32  | 142 | 1.00E-42 | 143  |
| TcMYB32 | ATMYB120  | 59.81 | 107 | 43  | 1 | 34  | 354 | 26  | 131 | 3.00E-42 | 149  |
| TcMYB32 | ATMYB75   | 58.1  | 105 | 44  | 0 | 31  | 345 | 7   | 111 | 3.00E-42 | 142  |
| TcMYB32 | ATMYB57   | 58.1  | 105 | 44  | 0 | 34  | 348 | 25  | 129 | 6.00E-42 | 140  |
| TcMYB32 | ATMYB65   | 57.69 | 104 | 44  | 0 | 34  | 345 | 41  | 144 | 6.00E-42 | 148  |
| TcMYB32 | ATMYB2    | 55.86 | 111 | 49  | 0 | 34  | 366 | 20  | 130 | 6.00E-42 | 142  |
| TcMYB32 | AtMYB97   | 56.31 | 103 | 45  | 0 | 34  | 342 | 19  | 121 | 1.00E-41 | 144  |
| TcMYB32 | ATMYB59-3 | 52.99 | 117 | 53  | 1 | 37  | 381 | 9   | 125 | 1.00E-41 | 140  |
| TcMYB32 | AtMYB81   | 55.66 | 106 | 47  | 0 | 25  | 342 | 17  | 122 | 2.00E-41 | 144  |
| TcMYB32 | AtMYB19   | 58.18 | 110 | 46  | 0 | 25  | 354 | 9   | 118 | 3.00E-41 | 140  |
| TcMYB32 | AtMYB113  | 53.91 | 115 | 53  | 1 | 1   | 345 | 1   | 111 | 9.00E-41 | 138  |
| TcMYB32 | ATMYB90   | 57.14 | 105 | 45  | 0 | 31  | 345 | 7   | 111 | 1.00E-40 | 138  |
| TcMYB32 | ATMYB78   | 50.39 | 129 | 50  | 1 | 22  | 366 | 22  | 150 | 4.00E-39 | 136  |
| TcMYB32 | AtMYB18   | 56.6  | 106 | 46  | 0 | 37  | 354 | 11  | 116 | 2.00E-38 | 133  |
| TcMYB32 | AtMYB27   | 58.65 | 104 | 43  | 0 | 34  | 345 | 9   | 112 | 3.00E-38 | 131  |
| TcMYB32 | AtMYB45   | 53.92 | 102 | 47  | 0 | 37  | 342 | 19  | 120 | 2.00E-37 | 130  |
| TcMYB32 | AtMYB104  | 43.93 | 107 | 60  | 1 | 40  | 360 | 18  | 120 | 1.00E-28 | 108  |
| TcMYB32 | AtMYB1    | 40.85 | 142 | 68  | 2 | 40  | 417 | 55  | 195 | 3.00E-28 | 107  |
| TcMYB32 | AtMYB115  | 35.58 | 163 | 98  | 4 | 34  | 501 | 156 | 316 | 5.00E-28 | 106  |
| TcMYB32 | ATMYB77   | 46.08 | 102 | 55  | 1 | 40  | 345 | 6   | 106 | 1.00E-27 | 104  |
| TcMYB32 | ATMYB25   | 48.54 | 103 | 52  | 2 | 40  | 345 | 50  | 150 | 2.00E-27 | 105  |
| TcMYB32 | AtMYB98   | 42.86 | 112 | 64  | 1 | 25  | 360 | 212 | 322 | 4.00E-27 | 105  |
| TcMYB32 | AtMYB109  | 48.54 | 103 | 52  | 2 | 40  | 345 | 56  | 156 | 4.00E-27 | 104  |
| TcMYB32 | ATMYB73   | 46.08 | 102 | 55  | 1 | 40  | 345 | 13  | 113 | 6.00E-27 | 102  |
| TcMYB32 | AtMYB70   | 46.08 | 102 | 55  | 1 | 40  | 345 | 13  | 113 | 9.00E-27 | 102  |
| TcMYB32 | ATMYB44   | 35.98 | 164 | 82  | 3 | 40  | 462 | 6   | 168 | 1.00E-26 | 101  |
| TcMYB32 | ATMYB118  | 41.8  | 122 | 71  | 1 | 25  | 390 | 184 | 304 | 1.00E-26 | 103  |
| TcMYB32 | ATMYB119  | 41.12 | 107 | 63  | 1 | 40  | 360 | 105 | 210 | 2.00E-26 | 103  |
| TcMYB32 | ATMYB54   | 43.33 | 120 | 64  | 3 | 40  | 387 | 6   | 123 | 5.00E-26 | 98.6 |
| TcMYB32 | ATMYB52   | 44.34 | 106 | 59  | 1 | 28  | 345 | 1   | 105 | 2.00E-25 | 97.1 |
| TcMYB32 | ATMYB52   | 32.08 | 53  | 35  | 1 | 199 | 354 | 5   | 57  | 6.00E-04 | 33.5 |
| TcMYB32 | AtMYB64   | 39.25 | 107 | 65  | 1 | 40  | 360 | 105 | 210 | 6.00E-25 | 98.6 |
| TcMYB32 | ATMYB105  | 42.06 | 107 | 62  | 1 | 25  | 345 | 102 | 207 | 2.00E-23 | 92.8 |
| TcMYB32 | ATMYB69   | 36.59 | 123 | 78  | 1 | 25  | 393 | 14  | 135 | 4.00E-23 | 90.5 |
| TcMYB32 | AtMYB117  | 42.16 | 102 | 59  | 1 | 40  | 345 | 98  | 198 | 4.00E-22 | 89.7 |
| TcMYB32 | AtMYB100  | 41.18 | 102 | 60  | 1 | 25  | 330 | 21  | 121 | 5.00E-22 | 87   |
| TcMYB32 | AtMYB56   | 41.18 | 102 | 60  | 1 | 40  | 345 | 93  | 193 | 3.00E-21 | 86.7 |

|         |           |       |     |     |   |    |      |     |     |          |      |
|---------|-----------|-------|-----|-----|---|----|------|-----|-----|----------|------|
| TcMYB32 | ATMYB110  | 39.81 | 103 | 62  | 1 | 40 | 348  | 67  | 168 | 4.00E-21 | 85.9 |
| TcMYB32 | AtMYB89   | 39.42 | 104 | 63  | 2 | 43 | 354  | 57  | 158 | 3.00E-19 | 78.2 |
| TcMYB32 | ATMYB88   | 41.41 | 99  | 58  | 1 | 49 | 345  | 33  | 130 | 4.00E-19 | 81.6 |
| TcMYB32 | AtMYB124  | 40.4  | 99  | 59  | 1 | 49 | 345  | 28  | 125 | 1.00E-18 | 79.7 |
| TcMYB32 | ATMYB91   | 35.24 | 105 | 66  | 1 | 37 | 345  | 3   | 107 | 2.00E-18 | 78.6 |
| TcMYB32 | AtMYB22   | 36.27 | 102 | 65  | 2 | 25 | 330  | 49  | 148 | 1.00E-17 | 75.1 |
| TcMYB33 | ATMYB73   | 41.81 | 342 | 196 | 7 | 22 | 1038 | 7   | 305 | 2.00E-78 | 236  |
| TcMYB33 | AtMYB70   | 43.08 | 318 | 172 | 9 | 22 | 948  | 7   | 273 | 1.00E-70 | 216  |
| TcMYB33 | ATMYB44   | 40.25 | 323 | 177 | 7 | 31 | 951  | 3   | 278 | 1.00E-67 | 208  |
| TcMYB33 | ATMYB77   | 38.39 | 310 | 188 | 5 | 31 | 951  | 3   | 271 | 5.00E-67 | 206  |
| TcMYB33 | AtMYB109  | 68.93 | 103 | 32  | 0 | 34 | 342  | 54  | 156 | 1.00E-50 | 167  |
| TcMYB33 | AtMYB1    | 33.72 | 347 | 220 | 9 | 31 | 1041 | 52  | 351 | 3.00E-49 | 163  |
| TcMYB33 | ATMYB25   | 60.55 | 109 | 43  | 0 | 16 | 342  | 42  | 150 | 1.00E-45 | 152  |
| TcMYB33 | ATMYB54   | 55.45 | 101 | 45  | 0 | 40 | 342  | 6   | 106 | 5.00E-41 | 137  |
| TcMYB33 | ATMYB52   | 52.48 | 101 | 48  | 0 | 40 | 342  | 5   | 105 | 2.00E-39 | 133  |
| TcMYB33 | AtMYB117  | 52.83 | 106 | 50  | 0 | 40 | 357  | 98  | 203 | 6.00E-39 | 135  |
| TcMYB33 | AtMYB56   | 56.44 | 101 | 44  | 0 | 40 | 342  | 93  | 193 | 1.00E-38 | 133  |
| TcMYB33 | ATMYB105  | 54.46 | 101 | 46  | 0 | 40 | 342  | 107 | 207 | 2.00E-38 | 132  |
| TcMYB33 | ATMYB69   | 52.48 | 101 | 48  | 0 | 40 | 342  | 19  | 119 | 5.00E-38 | 129  |
| TcMYB33 | ATMYB110  | 47.32 | 112 | 57  | 1 | 13 | 342  | 56  | 167 | 1.00E-34 | 122  |
| TcMYB33 | AtMYB64   | 39.33 | 150 | 80  | 2 | 37 | 453  | 104 | 253 | 1.00E-32 | 119  |
| TcMYB33 | ATMYB119  | 40.97 | 144 | 81  | 2 | 7  | 426  | 94  | 237 | 2.00E-32 | 119  |
| TcMYB33 | AtMYB98   | 46.96 | 115 | 61  | 0 | 4  | 348  | 205 | 319 | 2.00E-32 | 118  |
| TcMYB33 | AtMYB47   | 39.63 | 164 | 90  | 3 | 40 | 504  | 14  | 177 | 2.00E-32 | 115  |
| TcMYB33 | ATMYB118  | 49.11 | 112 | 57  | 0 | 13 | 348  | 180 | 291 | 4.00E-32 | 117  |
| TcMYB33 | ATMYB34   | 52.94 | 102 | 47  | 1 | 40 | 342  | 14  | 115 | 6.00E-32 | 114  |
| TcMYB33 | AtMYB49   | 48.7  | 115 | 58  | 1 | 1  | 342  | 1   | 115 | 7.00E-32 | 115  |
| TcMYB33 | ATMYB121  | 52.48 | 101 | 47  | 1 | 40 | 339  | 29  | 129 | 8.00E-32 | 114  |
| TcMYB33 | ATMYB92   | 50.98 | 102 | 49  | 1 | 40 | 342  | 14  | 115 | 2.00E-31 | 114  |
| TcMYB33 | ATMYB96   | 32.78 | 241 | 153 | 7 | 22 | 717  | 8   | 228 | 2.00E-31 | 114  |
| TcMYB33 | ATMYB80   | 50    | 104 | 51  | 1 | 40 | 348  | 14  | 117 | 3.00E-31 | 113  |
| TcMYB33 | AtMYB97   | 52.48 | 101 | 47  | 1 | 40 | 339  | 21  | 121 | 3.00E-31 | 114  |
| TcMYB33 | ATMYB46   | 41.38 | 145 | 84  | 2 | 40 | 471  | 20  | 158 | 3.00E-31 | 112  |
| TcMYB33 | AtMYB41   | 51.96 | 102 | 48  | 1 | 40 | 342  | 14  | 115 | 3.00E-31 | 112  |
| TcMYB33 | ATMYB23   | 46.96 | 115 | 60  | 1 | 1  | 342  | 1   | 115 | 4.00E-31 | 110  |
| TcMYB33 | AtMYB51   | 51.96 | 102 | 48  | 1 | 40 | 342  | 15  | 116 | 5.00E-31 | 113  |
| TcMYB33 | ATMYB95   | 51.96 | 102 | 48  | 1 | 40 | 342  | 14  | 115 | 5.00E-31 | 111  |
| TcMYB33 | AtMYB89   | 45.45 | 99  | 54  | 0 | 43 | 339  | 57  | 155 | 6.00E-31 | 109  |
| TcMYB33 | AtMYB60   | 43.41 | 129 | 68  | 3 | 40 | 411  | 14  | 126 | 6.00E-31 | 111  |
| TcMYB33 | ATMYB31   | 30.77 | 273 | 173 | 9 | 22 | 792  | 8   | 268 | 8.00E-31 | 112  |
| TcMYB33 | ATMYB94   | 39.47 | 152 | 82  | 5 | 40 | 465  | 14  | 159 | 9.00E-31 | 112  |
| TcMYB33 | ATMYB14   | 50.96 | 104 | 50  | 1 | 40 | 348  | 14  | 117 | 1.00E-30 | 110  |
| TcMYB33 | ATMYB35   | 51.96 | 102 | 48  | 1 | 40 | 342  | 14  | 115 | 1.00E-30 | 111  |
| TcMYB33 | ATMYB63   | 48.18 | 110 | 56  | 1 | 40 | 366  | 16  | 125 | 2.00E-30 | 110  |
| TcMYB33 | ATMYB63   | 25.97 | 77  | 57  | 1 | 31 | 261  | 66  | 141 | 5.00E-04 | 33.5 |
| TcMYB33 | AtMYB107  | 50    | 102 | 50  | 1 | 40 | 342  | 14  | 115 | 4.00E-30 | 110  |
| TcMYB33 | ATMYB30   | 35.18 | 199 | 105 | 6 | 40 | 564  | 14  | 201 | 4.00E-30 | 110  |
| TcMYB33 | ATMYB106  | 51.96 | 102 | 48  | 1 | 40 | 342  | 57  | 158 | 4.00E-30 | 111  |
| TcMYB33 | AtMYB115  | 41.86 | 129 | 75  | 1 | 40 | 426  | 158 | 279 | 5.00E-30 | 110  |
| TcMYB33 | AtMYB82   | 49.02 | 102 | 51  | 1 | 40 | 342  | 14  | 115 | 5.00E-30 | 107  |
| TcMYB33 | ATMYB66   | 50    | 102 | 50  | 1 | 40 | 342  | 18  | 119 | 6.00E-30 | 107  |
| TcMYB33 | ATMYB13   | 44.19 | 129 | 70  | 3 | 22 | 402  | 8   | 127 | 6.00E-30 | 108  |
| TcMYB33 | ATMYB26   | 47.83 | 115 | 50  | 2 | 40 | 354  | 14  | 128 | 8.00E-30 | 110  |
| TcMYB33 | ATMYB48   | 46.3  | 108 | 57  | 2 | 22 | 342  | 4   | 110 | 1.00E-29 | 107  |
| TcMYB33 | AtMYB74   | 50.98 | 102 | 49  | 1 | 40 | 342  | 15  | 116 | 1.00E-29 | 109  |
| TcMYB33 | ATMYB16   | 50.98 | 102 | 49  | 1 | 40 | 342  | 14  | 115 | 1.00E-29 | 109  |
| TcMYB33 | AtMYB53   | 45.22 | 115 | 62  | 1 | 1  | 342  | 1   | 115 | 1.00E-29 | 108  |
| TcMYB33 | ATMYB101  | 50.98 | 102 | 49  | 1 | 40 | 342  | 20  | 121 | 1.00E-29 | 111  |
| TcMYB33 | AtMYB79   | 49.07 | 108 | 54  | 2 | 22 | 342  | 3   | 109 | 1.00E-29 | 107  |
| TcMYB33 | AtMYB45   | 38.41 | 164 | 100 | 3 | 40 | 528  | 20  | 172 | 1.00E-29 | 107  |
| TcMYB33 | ATMYB72   | 44.19 | 129 | 68  | 4 | 40 | 414  | 16  | 143 | 1.00E-29 | 108  |
| TcMYB33 | ATMYB59-3 | 45.1  | 102 | 55  | 1 | 40 | 342  | 10  | 111 | 1.00E-29 | 107  |
| TcMYB33 | AtMYB17   | 48.54 | 103 | 51  | 2 | 40 | 342  | 14  | 115 | 2.00E-29 | 108  |
| TcMYB33 | AtMYB9    | 50.98 | 102 | 49  | 1 | 40 | 342  | 14  | 115 | 2.00E-29 | 108  |
| TcMYB33 | AtMYB6    | 35.91 | 181 | 115 | 3 | 22 | 561  | 8   | 177 | 2.00E-29 | 106  |
| TcMYB33 | ATMYB122  | 49.5  | 101 | 50  | 1 | 40 | 339  | 14  | 114 | 3.00E-29 | 108  |
| TcMYB33 | AtMYB62   | 33.7  | 181 | 119 | 4 | 7  | 546  | 10  | 171 | 4.00E-29 | 107  |
| TcMYB33 | ATMYB4    | 49.07 | 108 | 54  | 1 | 22 | 342  | 8   | 115 | 6.00E-29 | 106  |
| TcMYB33 | AtMYB93   | 48.04 | 102 | 52  | 1 | 40 | 342  | 14  | 115 | 7.00E-29 | 107  |
| TcMYB33 | MYB8      | 45.37 | 108 | 58  | 1 | 22 | 342  | 8   | 115 | 1.00E-28 | 103  |
| TcMYB33 | ATMYB3    | 47.22 | 108 | 56  | 1 | 22 | 342  | 8   | 115 | 1.00E-28 | 105  |
| TcMYB33 | ATMYB0    | 44.17 | 120 | 65  | 2 | 40 | 393  | 16  | 135 | 1.00E-28 | 104  |
| TcMYB33 | ATMYB71   | 44.55 | 110 | 60  | 1 | 40 | 366  | 20  | 129 | 1.00E-28 | 105  |
| TcMYB33 | AtMYB83   | 50.47 | 107 | 52  | 1 | 40 | 357  | 32  | 138 | 1.00E-28 | 106  |
| TcMYB33 | ATMYB102  | 50    | 102 | 50  | 1 | 40 | 342  | 14  | 115 | 1.00E-28 | 106  |
| TcMYB33 | AtMYB32   | 41.72 | 151 | 87  | 2 | 40 | 489  | 14  | 155 | 2.00E-28 | 104  |
| TcMYB33 | AtMYB116  | 43.52 | 108 | 60  | 1 | 22 | 342  | 14  | 121 | 2.00E-28 | 104  |
| TcMYB33 | ATMYB67   | 49.02 | 102 | 51  | 1 | 40 | 342  | 24  | 125 | 3.00E-28 | 105  |
| TcMYB33 | ATMYB37   | 49.51 | 103 | 50  | 2 | 40 | 342  | 14  | 116 | 3.00E-28 | 105  |
| TcMYB33 | ATMYB15   | 46.3  | 108 | 57  | 1 | 22 | 342  | 8   | 115 | 3.00E-28 | 104  |

|         |          |       |     |     |   |    |     |    |     |          |      |
|---------|----------|-------|-----|-----|---|----|-----|----|-----|----------|------|
| TcMYB33 | AtMYB36  | 47.57 | 103 | 52  | 2 | 40 | 342 | 14 | 116 | 4.00E-28 | 105  |
| TcMYB33 | ATMYB38  | 49.51 | 103 | 50  | 2 | 40 | 342 | 14 | 116 | 4.00E-28 | 104  |
| TcMYB33 | AtMYB18  | 46.09 | 115 | 61  | 2 | 1  | 342 | 1  | 113 | 5.00E-28 | 103  |
| TcMYB33 | ATMYB65  | 47.06 | 102 | 53  | 1 | 40 | 342 | 43 | 144 | 5.00E-28 | 107  |
| TcMYB33 | ATMYB87  | 45.95 | 111 | 58  | 2 | 40 | 366 | 14 | 124 | 5.00E-28 | 104  |
| TcMYB33 | ATMYB123 | 48.15 | 108 | 55  | 2 | 22 | 342 | 12 | 117 | 5.00E-28 | 103  |
| TcMYB33 | MYB7     | 49.02 | 102 | 51  | 1 | 40 | 342 | 14 | 115 | 7.00E-28 | 103  |
| TcMYB33 | AtMYB103 | 50    | 102 | 50  | 1 | 40 | 342 | 14 | 115 | 7.00E-28 | 105  |
| TcMYB33 | ATMYB2   | 44.35 | 115 | 63  | 2 | 22 | 363 | 16 | 129 | 7.00E-28 | 103  |
| TcMYB33 | ATMYB120 | 49.5  | 101 | 50  | 1 | 40 | 339 | 28 | 128 | 7.00E-28 | 106  |
| TcMYB33 | ATMYB58  | 33.96 | 212 | 136 | 5 | 40 | 663 | 16 | 194 | 1.00E-27 | 102  |
| TcMYB33 | ATMYB61  | 35.09 | 171 | 110 | 2 | 40 | 549 | 14 | 179 | 1.00E-27 | 104  |
| TcMYB33 | AtMYB27  | 45.63 | 103 | 54  | 2 | 40 | 342 | 11 | 112 | 2.00E-27 | 101  |
| TcMYB33 | AtMYB81  | 48.51 | 101 | 51  | 1 | 40 | 339 | 22 | 122 | 3.00E-27 | 103  |
| TcMYB33 | ATMYB33  | 47.06 | 102 | 53  | 1 | 40 | 342 | 34 | 135 | 3.00E-27 | 104  |
| TcMYB33 | ATMYB11  | 48.15 | 108 | 55  | 1 | 22 | 342 | 8  | 115 | 4.00E-27 | 102  |
| TcMYB33 | ATMYB68  | 47.57 | 103 | 52  | 2 | 40 | 342 | 14 | 116 | 5.00E-27 | 102  |
| TcMYB33 | ATMYB86  | 49.02 | 102 | 51  | 1 | 40 | 342 | 14 | 115 | 5.00E-27 | 102  |
| TcMYB33 | AtMYB10  | 46.6  | 103 | 53  | 2 | 40 | 342 | 16 | 117 | 7.00E-27 | 99.8 |
| TcMYB33 | ATMYB84  | 46.6  | 103 | 53  | 2 | 40 | 342 | 14 | 116 | 7.00E-27 | 101  |
| TcMYB33 | ATMYB3   | 43.12 | 109 | 61  | 1 | 16 | 339 | 14 | 122 | 7.00E-27 | 99.4 |
| TcMYB33 | AtMYB19  | 45.61 | 114 | 58  | 3 | 13 | 342 | 3  | 115 | 9.00E-27 | 100  |
| TcMYB33 | ATMYB55  | 37.65 | 162 | 77  | 4 | 40 | 453 | 14 | 171 | 9.00E-27 | 101  |
| TcMYB33 | AtMYB24  | 44.55 | 101 | 55  | 1 | 40 | 339 | 19 | 119 | 1.00E-26 | 98.2 |
| TcMYB33 | ATMYB28  | 48.04 | 102 | 52  | 1 | 40 | 342 | 14 | 115 | 2.00E-26 | 101  |
| TcMYB33 | ATMYB5   | 47.06 | 102 | 53  | 1 | 40 | 342 | 25 | 126 | 2.00E-26 | 99   |
| TcMYB33 | AtMYB50  | 47.06 | 102 | 53  | 1 | 40 | 342 | 14 | 115 | 2.00E-26 | 100  |
| TcMYB33 | ATMYB57  | 46.53 | 101 | 53  | 1 | 40 | 339 | 27 | 127 | 2.00E-26 | 97.4 |
| TcMYB33 | ATMYB111 | 47.22 | 108 | 56  | 1 | 22 | 342 | 8  | 115 | 4.00E-26 | 99.8 |
| TcMYB33 | ATMYB12  | 46.3  | 108 | 57  | 1 | 22 | 342 | 8  | 115 | 4.00E-26 | 100  |
| TcMYB33 | ATMYB12  | 25.23 | 107 | 77  | 2 | 31 | 342 | 64 | 169 | 1.00E-04 | 35.8 |
| TcMYB33 | AtMYB76  | 47.06 | 102 | 53  | 1 | 40 | 342 | 14 | 115 | 5.00E-26 | 99.4 |
| TcMYB33 | AtMYB100 | 41.51 | 106 | 61  | 3 | 25 | 339 | 23 | 125 | 6.00E-26 | 97.1 |
| TcMYB33 | ATMYB29  | 47.52 | 101 | 52  | 1 | 40 | 339 | 14 | 114 | 7.00E-26 | 99   |
| TcMYB33 | AtMYB112 | 41.51 | 106 | 61  | 1 | 25 | 339 | 29 | 134 | 7.00E-26 | 97.1 |
| TcMYB33 | AtMYB40  | 38.17 | 131 | 72  | 3 | 40 | 405 | 14 | 143 | 8.00E-26 | 97.4 |
| TcMYB33 | AtMYB108 | 42.99 | 107 | 60  | 1 | 22 | 339 | 15 | 121 | 8.00E-26 | 98.6 |
| TcMYB33 | AtMYB104 | 45.1  | 102 | 54  | 2 | 40 | 339 | 18 | 118 | 9.00E-26 | 99.4 |
| TcMYB33 | AtMYB20  | 38.64 | 132 | 72  | 3 | 22 | 390 | 8  | 138 | 5.00E-25 | 95.5 |
| TcMYB33 | AtMYB114 | 41.18 | 102 | 59  | 1 | 40 | 342 | 10 | 111 | 2.00E-24 | 90.1 |
| TcMYB33 | AtMYB42  | 44.12 | 102 | 56  | 1 | 40 | 342 | 14 | 115 | 5.00E-24 | 92.8 |
| TcMYB33 | AtMYB85  | 44.12 | 102 | 56  | 1 | 40 | 342 | 14 | 115 | 2.00E-23 | 90.9 |
| TcMYB33 | ATMYB75  | 37.29 | 118 | 73  | 2 | 40 | 390 | 10 | 124 | 3.00E-23 | 90.1 |
| TcMYB33 | AtMYB43  | 41.28 | 109 | 62  | 2 | 22 | 342 | 8  | 115 | 9.00E-23 | 90.1 |
| TcMYB33 | ATMYB78  | 37.1  | 124 | 63  | 2 | 13 | 339 | 19 | 142 | 2.00E-22 | 89   |
| TcMYB33 | ATMYB88  | 36.89 | 103 | 65  | 0 | 49 | 357 | 33 | 135 | 4.00E-22 | 89.7 |
| TcMYB33 | ATMYB88  | 30.16 | 63  | 44  | 1 | 40 | 228 | 82 | 143 | 3.00E-05 | 37.7 |
| TcMYB33 | ATMYB90  | 40.2  | 102 | 60  | 1 | 40 | 342 | 10 | 111 | 5.00E-22 | 86.7 |
| TcMYB33 | AtMYB22  | 33.77 | 151 | 86  | 4 | 31 | 441 | 51 | 199 | 5.00E-22 | 86.7 |
| TcMYB33 | ATMYB99  | 41.74 | 115 | 59  | 2 | 22 | 342 | 9  | 123 | 6.00E-22 | 86.3 |
| TcMYB33 | AtMYB113 | 39.62 | 106 | 59  | 2 | 40 | 342 | 10 | 111 | 6.00E-22 | 86.3 |
| TcMYB33 | ATMYB91  | 29.07 | 227 | 156 | 4 | 49 | 714 | 7  | 216 | 1.00E-21 | 87.4 |
| TcMYB33 | AtMYB124 | 33.33 | 123 | 82  | 1 | 49 | 417 | 28 | 143 | 1.00E-21 | 87.8 |
| TcMYB33 | AtMYB124 | 30.56 | 72  | 50  | 1 | 40 | 255 | 77 | 147 | 7.00E-06 | 39.7 |
| TcMYB34 | AtMYB20  | 84.62 | 130 | 20  | 0 | 1  | 390 | 1  | 130 | 3.00E-85 | 253  |
| TcMYB34 | AtMYB85  | 56.22 | 217 | 89  | 3 | 1  | 633 | 1  | 208 | 4.00E-84 | 249  |
| TcMYB34 | AtMYB43  | 78.52 | 135 | 29  | 0 | 1  | 405 | 1  | 135 | 8.00E-82 | 245  |
| TcMYB34 | AtMYB42  | 71.43 | 161 | 40  | 3 | 1  | 465 | 1  | 160 | 3.00E-81 | 242  |
| TcMYB34 | ATMYB99  | 57.89 | 190 | 72  | 3 | 4  | 549 | 3  | 188 | 5.00E-73 | 220  |
| TcMYB34 | AtMYB40  | 71.64 | 134 | 37  | 1 | 1  | 399 | 1  | 134 | 2.00E-71 | 216  |
| TcMYB34 | AtMYB107 | 55.17 | 203 | 86  | 5 | 1  | 594 | 1  | 198 | 1.00E-69 | 214  |
| TcMYB34 | AtMYB17  | 74.42 | 129 | 33  | 0 | 1  | 387 | 1  | 129 | 2.00E-69 | 213  |
| TcMYB34 | AtMYB9   | 62.05 | 166 | 61  | 3 | 1  | 492 | 1  | 165 | 2.00E-69 | 214  |
| TcMYB34 | ATMYB16  | 55.32 | 188 | 81  | 2 | 1  | 555 | 1  | 181 | 3.00E-69 | 213  |
| TcMYB34 | ATMYB102 | 72.52 | 131 | 36  | 0 | 1  | 393 | 1  | 131 | 1.00E-67 | 209  |
| TcMYB34 | AtMYB93  | 60.24 | 166 | 66  | 2 | 1  | 498 | 1  | 162 | 2.00E-67 | 209  |
| TcMYB34 | AtMYB41  | 70.99 | 131 | 38  | 0 | 1  | 393 | 1  | 131 | 2.00E-66 | 204  |
| TcMYB34 | AtMYB6   | 47.01 | 234 | 105 | 5 | 1  | 645 | 1  | 223 | 1.00E-65 | 201  |
| TcMYB34 | AtMYB74  | 70.45 | 132 | 38  | 1 | 1  | 393 | 1  | 132 | 2.00E-65 | 203  |
| TcMYB34 | AtMYB50  | 50.23 | 217 | 102 | 4 | 1  | 633 | 1  | 205 | 5.00E-65 | 202  |
| TcMYB34 | ATMYB4   | 56.14 | 171 | 74  | 2 | 1  | 510 | 1  | 167 | 1.00E-64 | 199  |
| TcMYB34 | ATMYB92  | 49.28 | 207 | 105 | 2 | 1  | 621 | 1  | 203 | 2.00E-64 | 201  |
| TcMYB34 | ATMYB106 | 59.26 | 162 | 66  | 1 | 13 | 498 | 48 | 202 | 5.00E-64 | 201  |
| TcMYB34 | MYB8     | 52.97 | 185 | 80  | 3 | 1  | 534 | 1  | 175 | 5.00E-64 | 196  |
| TcMYB34 | AtMYB53  | 66.41 | 131 | 44  | 0 | 1  | 393 | 1  | 131 | 6.00E-64 | 199  |
| TcMYB34 | ATMYB86  | 54.29 | 175 | 80  | 1 | 1  | 525 | 1  | 158 | 1.00E-63 | 199  |
| TcMYB34 | ATMYB3   | 58.12 | 160 | 67  | 1 | 1  | 480 | 1  | 152 | 2.00E-63 | 196  |
| TcMYB34 | MYB7     | 65.19 | 135 | 47  | 0 | 1  | 405 | 1  | 135 | 2.00E-63 | 196  |
| TcMYB34 | AtMYB32  | 59.21 | 152 | 62  | 0 | 1  | 456 | 1  | 152 | 2.00E-63 | 196  |
| TcMYB34 | ATMYB61  | 67.18 | 131 | 43  | 0 | 1  | 393 | 1  | 131 | 3.00E-61 | 194  |

|         |           |       |     |     |    |     |     |     |     |          |      |
|---------|-----------|-------|-----|-----|----|-----|-----|-----|-----|----------|------|
| TcMYB34 | ATMYB80   | 53.37 | 178 | 66  | 3  | 1   | 483 | 1   | 178 | 4.00E-61 | 192  |
| TcMYB34 | ATMYB5    | 66.4  | 125 | 42  | 0  | 13  | 387 | 16  | 140 | 2.00E-60 | 187  |
| TcMYB34 | AtMYB49   | 68.75 | 128 | 40  | 0  | 1   | 384 | 1   | 128 | 3.00E-60 | 189  |
| TcMYB34 | ATMYB13   | 49.74 | 189 | 95  | 2  | 1   | 567 | 1   | 173 | 8.00E-60 | 186  |
| TcMYB34 | ATMYB28   | 62.88 | 132 | 49  | 0  | 1   | 396 | 1   | 132 | 2.00E-59 | 189  |
| TcMYB34 | ATMYB15   | 46.27 | 201 | 96  | 2  | 1   | 567 | 1   | 199 | 5.00E-59 | 185  |
| TcMYB34 | ATMYB29   | 64.62 | 130 | 46  | 0  | 1   | 390 | 1   | 130 | 2.00E-58 | 185  |
| TcMYB34 | ATMYB14   | 46.01 | 213 | 109 | 4  | 1   | 621 | 1   | 194 | 3.00E-58 | 182  |
| TcMYB34 | AtMYB76   | 45.73 | 199 | 107 | 2  | 1   | 594 | 1   | 197 | 4.00E-58 | 184  |
| TcMYB34 | ATMYB34   | 42.92 | 240 | 128 | 5  | 1   | 693 | 1   | 226 | 2.00E-57 | 181  |
| TcMYB34 | ATMYB35   | 45    | 220 | 115 | 4  | 1   | 642 | 1   | 212 | 5.00E-57 | 181  |
| TcMYB34 | ATMYB111  | 67.24 | 116 | 38  | 0  | 1   | 348 | 1   | 116 | 3.00E-56 | 180  |
| TcMYB34 | ATMYB63   | 50.85 | 177 | 86  | 2  | 4   | 531 | 4   | 175 | 6.00E-56 | 177  |
| TcMYB34 | ATMYB58   | 67.24 | 116 | 38  | 0  | 4   | 351 | 4   | 119 | 1.00E-55 | 176  |
| TcMYB34 | AtMYB51   | 63.78 | 127 | 45  | 1  | 1   | 378 | 1   | 127 | 1.00E-55 | 178  |
| TcMYB34 | ATMYB12   | 67.24 | 116 | 38  | 0  | 1   | 348 | 1   | 116 | 2.00E-55 | 179  |
| TcMYB34 | ATMYB67   | 63.64 | 121 | 44  | 0  | 16  | 378 | 16  | 136 | 2.00E-55 | 177  |
| TcMYB34 | ATMYB11   | 37.25 | 306 | 187 | 6  | 1   | 903 | 1   | 271 | 2.00E-55 | 177  |
| TcMYB34 | ATMYB122  | 61.83 | 131 | 50  | 0  | 1   | 393 | 1   | 131 | 1.00E-54 | 176  |
| TcMYB34 | ATMYB55   | 61.59 | 138 | 41  | 1  | 1   | 378 | 1   | 138 | 1.00E-54 | 176  |
| TcMYB34 | ATMYB72   | 66.38 | 116 | 39  | 0  | 4   | 351 | 4   | 119 | 1.00E-54 | 174  |
| TcMYB34 | ATMYB94   | 65.55 | 119 | 41  | 0  | 1   | 357 | 1   | 119 | 3.00E-54 | 174  |
| TcMYB34 | AtMYB60   | 63.93 | 122 | 44  | 0  | 1   | 366 | 1   | 122 | 4.00E-54 | 172  |
| TcMYB34 | AtMYB10   | 63.03 | 119 | 44  | 0  | 7   | 363 | 5   | 123 | 6.00E-54 | 171  |
| TcMYB34 | ATMYB30   | 63.93 | 122 | 44  | 0  | 1   | 366 | 1   | 122 | 6.00E-53 | 171  |
| TcMYB34 | ATMYB96   | 43.12 | 218 | 124 | 2  | 1   | 654 | 1   | 184 | 7.00E-53 | 171  |
| TcMYB34 | ATMYB31   | 65.55 | 119 | 41  | 0  | 1   | 357 | 1   | 119 | 8.00E-53 | 171  |
| TcMYB34 | ATMYB95   | 55.1  | 147 | 66  | 0  | 1   | 441 | 1   | 147 | 1.00E-52 | 168  |
| TcMYB34 | AtMYB47   | 58.82 | 136 | 56  | 1  | 1   | 408 | 1   | 135 | 2.00E-52 | 167  |
| TcMYB34 | AtMYB103  | 50.31 | 161 | 78  | 2  | 1   | 477 | 1   | 161 | 3.00E-52 | 170  |
| TcMYB34 | ATMYB26   | 62.4  | 125 | 38  | 1  | 1   | 348 | 1   | 125 | 8.00E-51 | 166  |
| TcMYB34 | ATMYB46   | 66.67 | 108 | 36  | 0  | 34  | 357 | 18  | 125 | 2.00E-48 | 158  |
| TcMYB34 | ATMYB38   | 54.74 | 137 | 60  | 2  | 1   | 405 | 1   | 137 | 1.00E-47 | 156  |
| TcMYB34 | AtMYB19   | 43.27 | 208 | 88  | 5  | 37  | 570 | 13  | 216 | 2.00E-47 | 154  |
| TcMYB34 | ATMYB84   | 60.68 | 117 | 45  | 1  | 1   | 348 | 1   | 117 | 4.00E-47 | 155  |
| TcMYB34 | ATMYB68   | 60.68 | 117 | 45  | 1  | 1   | 348 | 1   | 117 | 4.00E-47 | 157  |
| TcMYB34 | ATMYB37   | 59.83 | 117 | 46  | 1  | 1   | 348 | 1   | 117 | 6.00E-47 | 155  |
| TcMYB34 | AtMYB36   | 59.83 | 117 | 46  | 1  | 1   | 348 | 1   | 117 | 2.00E-46 | 154  |
| TcMYB34 | AtMYB83   | 62.39 | 109 | 41  | 0  | 22  | 348 | 26  | 134 | 6.00E-46 | 153  |
| TcMYB34 | ATMYB71   | 63.81 | 105 | 38  | 0  | 31  | 345 | 17  | 121 | 7.00E-46 | 150  |
| TcMYB34 | AtMYB79   | 64.08 | 103 | 37  | 0  | 37  | 345 | 7   | 109 | 3.00E-45 | 149  |
| TcMYB34 | AtMYB108  | 57.39 | 115 | 49  | 0  | 22  | 366 | 15  | 129 | 5.00E-45 | 150  |
| TcMYB34 | ATMYB87   | 57.26 | 117 | 49  | 1  | 1   | 348 | 1   | 117 | 1.00E-44 | 149  |
| TcMYB34 | ATMYB57   | 55.65 | 115 | 51  | 0  | 34  | 378 | 25  | 139 | 1.00E-44 | 145  |
| TcMYB34 | AtMYB18   | 64.08 | 103 | 37  | 0  | 37  | 345 | 11  | 113 | 2.00E-44 | 147  |
| TcMYB34 | ATMYB33   | 39.57 | 235 | 129 | 9  | 22  | 687 | 28  | 235 | 2.00E-44 | 152  |
| TcMYB34 | ATMYB101  | 58.62 | 116 | 48  | 1  | 31  | 378 | 17  | 131 | 4.00E-44 | 151  |
| TcMYB34 | ATMYB121  | 62.5  | 104 | 39  | 0  | 31  | 342 | 26  | 129 | 5.00E-44 | 146  |
| TcMYB34 | AtMYB62   | 57.66 | 111 | 47  | 0  | 34  | 366 | 19  | 129 | 6.00E-44 | 146  |
| TcMYB34 | ATMYB3    | 50    | 134 | 67  | 1  | 34  | 435 | 20  | 151 | 1.00E-43 | 143  |
| TcMYB34 | AtMYB116  | 55.26 | 114 | 51  | 0  | 37  | 378 | 19  | 132 | 2.00E-43 | 145  |
| TcMYB34 | AtMYB24   | 56.88 | 109 | 47  | 0  | 34  | 360 | 17  | 125 | 2.00E-43 | 142  |
| TcMYB34 | ATMYB123  | 60.75 | 107 | 42  | 0  | 34  | 354 | 14  | 120 | 2.00E-43 | 144  |
| TcMYB34 | ATMYB66   | 60.58 | 104 | 41  | 0  | 37  | 348 | 17  | 120 | 4.00E-43 | 141  |
| TcMYB34 | AtMYB112  | 55.26 | 114 | 51  | 0  | 25  | 366 | 29  | 142 | 4.00E-43 | 142  |
| TcMYB34 | ATMYB23   | 60.58 | 104 | 41  | 0  | 37  | 348 | 13  | 116 | 5.00E-43 | 142  |
| TcMYB34 | ATMYB120  | 59.02 | 122 | 50  | 2  | 34  | 399 | 26  | 145 | 6.00E-43 | 149  |
| TcMYB34 | ATMYB65   | 59.62 | 104 | 42  | 0  | 34  | 345 | 41  | 144 | 2.00E-42 | 147  |
| TcMYB34 | ATMYB0    | 57.69 | 104 | 44  | 0  | 37  | 348 | 15  | 118 | 9.00E-42 | 139  |
| TcMYB34 | AtMYB81   | 42.44 | 172 | 94  | 3  | 25  | 525 | 17  | 185 | 2.00E-41 | 143  |
| TcMYB34 | AtMYB97   | 58.04 | 112 | 47  | 1  | 28  | 363 | 17  | 127 | 3.00E-41 | 142  |
| TcMYB34 | ATMYB48   | 59.05 | 105 | 43  | 0  | 31  | 345 | 6   | 110 | 3.00E-41 | 138  |
| TcMYB34 | ATMYB59-3 | 60.19 | 103 | 41  | 0  | 37  | 345 | 9   | 111 | 3.00E-41 | 137  |
| TcMYB34 | AtMYB45   | 57.84 | 102 | 43  | 0  | 37  | 342 | 19  | 120 | 6.00E-41 | 137  |
| TcMYB34 | ATMYB2    | 34.51 | 255 | 140 | 6  | 34  | 717 | 20  | 262 | 2.00E-40 | 137  |
| TcMYB34 | AtMYB114  | 59.05 | 105 | 43  | 0  | 31  | 345 | 7   | 111 | 2.00E-40 | 132  |
| TcMYB34 | AtMYB82   | 49.24 | 132 | 58  | 1  | 34  | 402 | 12  | 143 | 2.00E-40 | 134  |
| TcMYB34 | ATMYB75   | 38.74 | 191 | 109 | 2  | 31  | 579 | 7   | 196 | 6.00E-40 | 134  |
| TcMYB34 | ATMYB90   | 60    | 105 | 42  | 0  | 31  | 345 | 7   | 111 | 2.00E-39 | 133  |
| TcMYB34 | AtMYB27   | 57.69 | 104 | 44  | 0  | 34  | 345 | 9   | 112 | 7.00E-39 | 131  |
| TcMYB34 | AtMYB113  | 54.78 | 115 | 52  | 1  | 1   | 345 | 1   | 111 | 9.00E-38 | 129  |
| TcMYB34 | ATMYB78   | 44.96 | 129 | 57  | 1  | 22  | 366 | 22  | 150 | 5.00E-37 | 129  |
| TcMYB34 | AtMYB104  | 39.87 | 153 | 92  | 3  | 40  | 498 | 18  | 160 | 2.00E-31 | 115  |
| TcMYB34 | AtMYB64   | 45.28 | 106 | 57  | 2  | 40  | 354 | 105 | 208 | 5.00E-29 | 108  |
| TcMYB34 | ATMYB119  | 46.3  | 108 | 57  | 2  | 34  | 354 | 103 | 208 | 1.00E-28 | 108  |
| TcMYB34 | ATMYB119  | 22.39 | 67  | 52  | 0  | 211 | 411 | 110 | 176 | 3.00E-05 | 37.7 |
| TcMYB34 | AtMYB98   | 45.05 | 111 | 60  | 2  | 25  | 354 | 212 | 320 | 3.00E-28 | 107  |
| TcMYB34 | ATMYB118  | 43.38 | 136 | 74  | 4  | 25  | 423 | 184 | 309 | 1.00E-27 | 105  |
| TcMYB34 | ATMYB25   | 45.54 | 112 | 60  | 2  | 40  | 372 | 50  | 159 | 1.00E-25 | 98.6 |
| TcMYB34 | ATMYB44   | 30.03 | 293 | 167 | 10 | 40  | 804 | 6   | 293 | 2.00E-25 | 97.4 |

|         |          |       |     |     |    |     |      |     |     |          |      |
|---------|----------|-------|-----|-----|----|-----|------|-----|-----|----------|------|
| TcMYB34 | ATMYB73  | 45.37 | 108 | 58  | 2  | 40  | 360  | 13  | 118 | 2.00E-25 | 97.4 |
| TcMYB34 | AtMYB109 | 48.54 | 103 | 52  | 2  | 40  | 345  | 56  | 156 | 3.00E-25 | 98.2 |
| TcMYB34 | AtMYB70  | 45.37 | 108 | 58  | 2  | 40  | 360  | 13  | 118 | 2.00E-24 | 94.7 |
| TcMYB34 | AtMYB1   | 45.63 | 103 | 55  | 2  | 40  | 345  | 55  | 155 | 2.00E-24 | 95.9 |
| TcMYB34 | AtMYB1   | 21.88 | 192 | 138 | 4  | 184 | 723  | 50  | 236 | 2.00E-05 | 38.5 |
| TcMYB34 | ATMYB77  | 43.81 | 105 | 58  | 2  | 40  | 351  | 6   | 108 | 2.00E-24 | 94.4 |
| TcMYB34 | AtMYB115 | 42.71 | 96  | 55  | 1  | 40  | 327  | 158 | 252 | 5.00E-24 | 94   |
| TcMYB34 | AtMYB100 | 33.71 | 178 | 117 | 5  | 25  | 555  | 21  | 175 | 1.00E-23 | 90.9 |
| TcMYB34 | ATMYB105 | 40.74 | 108 | 63  | 2  | 25  | 345  | 102 | 207 | 3.00E-22 | 88.6 |
| TcMYB34 | ATMYB54  | 41.75 | 103 | 59  | 2  | 40  | 345  | 6   | 106 | 8.00E-22 | 85.9 |
| TcMYB34 | ATMYB52  | 40.78 | 103 | 60  | 2  | 40  | 345  | 5   | 105 | 2.00E-21 | 85.1 |
| TcMYB34 | AtMYB117 | 41.9  | 105 | 60  | 2  | 34  | 345  | 96  | 198 | 4.00E-21 | 85.9 |
| TcMYB34 | ATMYB110 | 38.46 | 104 | 63  | 2  | 40  | 348  | 67  | 168 | 8.00E-20 | 81.3 |
| TcMYB34 | AtMYB22  | 33.04 | 112 | 75  | 1  | 25  | 360  | 49  | 158 | 4.00E-19 | 78.6 |
| TcMYB34 | AtMYB56  | 37.25 | 102 | 64  | 1  | 40  | 345  | 93  | 193 | 5.00E-19 | 79.3 |
| TcMYB34 | ATMYB69  | 37.04 | 108 | 67  | 2  | 25  | 345  | 14  | 119 | 2.00E-18 | 76.6 |
| TcMYB34 | ATMYB91  | 38.61 | 101 | 60  | 1  | 49  | 345  | 7   | 107 | 2.00E-18 | 78.2 |
| TcMYB34 | AtMYB89  | 35.42 | 96  | 62  | 1  | 43  | 330  | 57  | 151 | 1.00E-15 | 67.4 |
| TcMYB34 | AtMYB124 | 37.37 | 99  | 62  | 1  | 49  | 345  | 28  | 125 | 3.00E-14 | 65.9 |
| TcMYB34 | ATMYB88  | 37.37 | 99  | 62  | 1  | 49  | 345  | 33  | 130 | 7.00E-14 | 64.7 |
| TcMYB35 | ATMYB65  | 38.36 | 451 | 262 | 13 | 13  | 1317 | 12  | 414 | 5.00E-79 | 251  |
| TcMYB35 | ATMYB33  | 40.83 | 436 | 244 | 15 | 43  | 1308 | 8   | 412 | 1.00E-78 | 249  |
| TcMYB35 | ATMYB101 | 39.51 | 405 | 233 | 9  | 106 | 1284 | 15  | 369 | 2.00E-73 | 234  |
| TcMYB35 | ATMYB120 | 60    | 190 | 57  | 3  | 64  | 576  | 9   | 188 | 6.00E-71 | 229  |
| TcMYB35 | AtMYB81  | 38.4  | 401 | 232 | 13 | 112 | 1269 | 19  | 367 | 4.00E-67 | 216  |
| TcMYB35 | AtMYB97  | 61.96 | 163 | 62  | 1  | 88  | 576  | 10  | 154 | 7.00E-67 | 214  |
| TcMYB35 | ATMYB102 | 34.19 | 351 | 218 | 11 | 115 | 1128 | 12  | 322 | 2.00E-50 | 169  |
| TcMYB35 | AtMYB74  | 51.33 | 150 | 70  | 2  | 115 | 555  | 13  | 162 | 4.00E-49 | 165  |
| TcMYB35 | AtMYB9   | 38.91 | 239 | 136 | 5  | 115 | 801  | 12  | 246 | 5.00E-49 | 165  |
| TcMYB35 | AtMYB107 | 66.35 | 104 | 35  | 0  | 115 | 426  | 12  | 115 | 6.00E-48 | 162  |
| TcMYB35 | ATMYB66  | 43.18 | 176 | 83  | 2  | 76  | 552  | 3   | 178 | 1.00E-47 | 157  |
| TcMYB35 | AtMYB17  | 64.42 | 104 | 37  | 0  | 115 | 426  | 12  | 115 | 1.00E-47 | 160  |
| TcMYB35 | AtMYB41  | 45.98 | 174 | 91  | 3  | 115 | 627  | 12  | 182 | 5.00E-47 | 158  |
| TcMYB35 | ATMYB3   | 63.46 | 104 | 38  | 0  | 115 | 426  | 12  | 115 | 6.00E-47 | 157  |
| TcMYB35 | ATMYB15  | 38.14 | 236 | 142 | 5  | 115 | 810  | 12  | 231 | 1.00E-46 | 157  |
| TcMYB35 | AtMYB6   | 65.69 | 102 | 35  | 0  | 121 | 426  | 14  | 115 | 1.00E-46 | 155  |
| TcMYB35 | MYB8     | 62.5  | 104 | 39  | 0  | 115 | 426  | 12  | 115 | 2.00E-46 | 154  |
| TcMYB35 | ATMYB5   | 50.74 | 136 | 63  | 3  | 115 | 510  | 23  | 155 | 5.00E-46 | 154  |
| TcMYB35 | ATMYB67  | 43.75 | 176 | 98  | 2  | 103 | 627  | 18  | 190 | 6.00E-46 | 156  |
| TcMYB35 | MYB7     | 63.46 | 104 | 38  | 0  | 115 | 426  | 12  | 115 | 6.00E-46 | 155  |
| TcMYB35 | ATMYB13  | 50.33 | 153 | 75  | 3  | 115 | 570  | 12  | 150 | 2.00E-45 | 153  |
| TcMYB35 | ATMYB57  | 48.59 | 142 | 73  | 1  | 109 | 534  | 23  | 142 | 2.00E-45 | 151  |
| TcMYB35 | AtMYB79  | 61.9  | 105 | 40  | 0  | 118 | 432  | 7   | 111 | 3.00E-45 | 153  |
| TcMYB35 | ATMYB63  | 47.37 | 152 | 75  | 1  | 115 | 555  | 14  | 165 | 3.00E-45 | 154  |
| TcMYB35 | ATMYB4   | 64.71 | 102 | 36  | 0  | 121 | 426  | 14  | 115 | 3.00E-45 | 153  |
| TcMYB35 | ATMYB14  | 48.05 | 154 | 80  | 1  | 115 | 576  | 12  | 164 | 5.00E-45 | 152  |
| TcMYB35 | ATMYB92  | 63.46 | 104 | 38  | 0  | 115 | 426  | 12  | 115 | 9.00E-45 | 154  |
| TcMYB35 | ATMYB58  | 42.16 | 185 | 97  | 4  | 115 | 639  | 14  | 182 | 1.00E-44 | 152  |
| TcMYB35 | ATMYB71  | 56.3  | 119 | 46  | 1  | 94  | 432  | 5   | 123 | 1.00E-44 | 151  |
| TcMYB35 | ATMYB121 | 47.71 | 153 | 80  | 1  | 118 | 576  | 28  | 178 | 1.00E-44 | 151  |
| TcMYB35 | AtMYB32  | 62.75 | 102 | 38  | 0  | 121 | 426  | 14  | 115 | 2.00E-44 | 151  |
| TcMYB35 | ATMYB3   | 41.42 | 169 | 95  | 2  | 94  | 588  | 13  | 181 | 3.00E-44 | 149  |
| TcMYB35 | AtMYB53  | 60.58 | 104 | 41  | 0  | 115 | 426  | 12  | 115 | 3.00E-44 | 151  |
| TcMYB35 | AtMYB49  | 61.54 | 104 | 40  | 0  | 115 | 426  | 12  | 115 | 8.00E-44 | 150  |
| TcMYB35 | ATMYB30  | 59.43 | 106 | 43  | 0  | 109 | 426  | 10  | 115 | 9.00E-44 | 150  |
| TcMYB35 | AtMYB51  | 42.08 | 202 | 115 | 5  | 115 | 714  | 13  | 194 | 9.00E-44 | 151  |
| TcMYB35 | ATMYB16  | 59.62 | 104 | 42  | 0  | 115 | 426  | 12  | 115 | 1.00E-43 | 150  |
| TcMYB35 | ATMYB106 | 60.58 | 104 | 41  | 0  | 115 | 426  | 55  | 158 | 1.00E-43 | 152  |
| TcMYB35 | AtMYB60  | 45.64 | 149 | 81  | 1  | 115 | 561  | 12  | 152 | 1.00E-43 | 149  |
| TcMYB35 | AtMYB93  | 61.54 | 104 | 40  | 0  | 115 | 426  | 12  | 115 | 1.00E-43 | 151  |
| TcMYB35 | ATMYB28  | 47.44 | 156 | 78  | 3  | 106 | 561  | 9   | 164 | 2.00E-43 | 150  |
| TcMYB35 | AtMYB24  | 52.94 | 119 | 50  | 1  | 85  | 423  | 1   | 119 | 4.00E-43 | 145  |
| TcMYB35 | ATMYB29  | 60.38 | 106 | 42  | 0  | 106 | 423  | 9   | 114 | 5.00E-43 | 149  |
| TcMYB35 | ATMYB86  | 53.54 | 127 | 58  | 2  | 115 | 492  | 12  | 135 | 5.00E-43 | 149  |
| TcMYB35 | ATMYB23  | 57.28 | 103 | 44  | 0  | 118 | 426  | 13  | 115 | 6.00E-43 | 145  |
| TcMYB35 | AtMYB20  | 57.94 | 107 | 45  | 0  | 115 | 435  | 12  | 118 | 6.00E-43 | 147  |
| TcMYB35 | AtMYB116 | 52.63 | 114 | 54  | 0  | 94  | 435  | 11  | 124 | 6.00E-43 | 147  |
| TcMYB35 | AtMYB50  | 60.58 | 104 | 41  | 0  | 115 | 426  | 12  | 115 | 7.00E-43 | 148  |
| TcMYB35 | AtMYB76  | 58.88 | 107 | 44  | 0  | 106 | 426  | 9   | 115 | 9.00E-43 | 148  |
| TcMYB35 | ATMYB34  | 58.88 | 107 | 44  | 0  | 115 | 435  | 12  | 118 | 1.00E-42 | 147  |
| TcMYB35 | ATMYB99  | 51.49 | 134 | 57  | 2  | 115 | 492  | 13  | 146 | 1.00E-42 | 145  |
| TcMYB35 | ATMYB96  | 47.52 | 141 | 74  | 1  | 115 | 537  | 12  | 142 | 1.00E-42 | 148  |
| TcMYB35 | ATMYB31  | 59.62 | 104 | 42  | 0  | 115 | 426  | 12  | 115 | 1.00E-42 | 147  |
| TcMYB35 | AtMYB103 | 43.53 | 170 | 94  | 3  | 115 | 618  | 12  | 174 | 2.00E-42 | 148  |
| TcMYB35 | ATMYB94  | 57.01 | 107 | 46  | 0  | 115 | 435  | 12  | 118 | 4.00E-42 | 146  |
| TcMYB35 | ATMYB46  | 42.11 | 171 | 99  | 2  | 115 | 627  | 18  | 174 | 4.00E-42 | 145  |
| TcMYB35 | AtMYB43  | 53.91 | 128 | 57  | 2  | 115 | 492  | 12  | 139 | 5.00E-42 | 146  |
| TcMYB35 | ATMYB111 | 57.69 | 104 | 44  | 0  | 115 | 426  | 12  | 115 | 5.00E-42 | 146  |
| TcMYB35 | ATMYB0   | 43.51 | 154 | 87  | 1  | 79  | 540  | 2   | 154 | 6.00E-42 | 143  |
| TcMYB35 | ATMYB87  | 58.49 | 106 | 43  | 1  | 112 | 426  | 11  | 116 | 6.00E-42 | 145  |

|         |           |       |     |     |    |     |      |     |     |          |      |
|---------|-----------|-------|-----|-----|----|-----|------|-----|-----|----------|------|
| TcMYB35 | AtMYB85   | 57.69 | 104 | 44  | 0  | 115 | 426  | 12  | 115 | 8.00E-42 | 144  |
| TcMYB35 | ATMYB80   | 36.62 | 213 | 126 | 5  | 112 | 723  | 11  | 221 | 1.00E-41 | 145  |
| TcMYB35 | ATMYB61   | 35.9  | 312 | 195 | 13 | 115 | 1035 | 12  | 291 | 1.00E-41 | 146  |
| TcMYB35 | ATMYB72   | 46.38 | 138 | 73  | 1  | 115 | 525  | 14  | 151 | 2.00E-41 | 144  |
| TcMYB35 | ATMYB123  | 55.77 | 104 | 46  | 0  | 115 | 426  | 14  | 117 | 2.00E-41 | 142  |
| TcMYB35 | AtMYB62   | 55.14 | 107 | 48  | 0  | 115 | 435  | 19  | 125 | 2.00E-41 | 143  |
| TcMYB35 | AtMYB82   | 52.14 | 117 | 53  | 1  | 103 | 444  | 8   | 124 | 2.00E-41 | 140  |
| TcMYB35 | AtMYB112  | 50    | 120 | 60  | 1  | 115 | 474  | 32  | 147 | 2.00E-41 | 142  |
| TcMYB35 | AtMYB42   | 57.69 | 104 | 44  | 0  | 115 | 426  | 12  | 115 | 3.00E-41 | 143  |
| TcMYB35 | ATMYB48   | 37.93 | 203 | 93  | 4  | 118 | 627  | 8   | 210 | 4.00E-41 | 141  |
| TcMYB35 | AtMYB108  | 51.67 | 120 | 58  | 1  | 115 | 474  | 19  | 134 | 6.00E-41 | 143  |
| TcMYB35 | ATMYB95   | 56.36 | 110 | 48  | 1  | 97  | 426  | 8   | 115 | 6.00E-41 | 141  |
| TcMYB35 | ATMYB122  | 45.12 | 164 | 82  | 3  | 115 | 582  | 12  | 175 | 1.00E-40 | 142  |
| TcMYB35 | AtMYB36   | 51.06 | 141 | 64  | 4  | 112 | 519  | 11  | 146 | 1.00E-40 | 142  |
| TcMYB35 | ATMYB12   | 55.77 | 104 | 46  | 0  | 115 | 426  | 12  | 115 | 1.00E-40 | 143  |
| TcMYB35 | ATMYB2    | 54.72 | 106 | 48  | 0  | 115 | 432  | 20  | 125 | 1.00E-40 | 140  |
| TcMYB35 | AtMYB83   | 44.37 | 151 | 75  | 2  | 115 | 540  | 30  | 180 | 1.00E-40 | 142  |
| TcMYB35 | ATMYB35   | 54.29 | 105 | 48  | 0  | 112 | 426  | 11  | 115 | 1.00E-40 | 142  |
| TcMYB35 | ATMYB55   | 55.08 | 118 | 41  | 1  | 115 | 432  | 12  | 129 | 1.00E-40 | 142  |
| TcMYB35 | AtMYB40   | 50.38 | 131 | 64  | 2  | 115 | 504  | 12  | 139 | 2.00E-40 | 140  |
| TcMYB35 | ATMYB59-3 | 53.98 | 113 | 51  | 1  | 118 | 453  | 9   | 121 | 2.00E-40 | 139  |
| TcMYB35 | AtMYB104  | 41.57 | 166 | 95  | 1  | 121 | 612  | 18  | 183 | 3.00E-40 | 142  |
| TcMYB35 | AtMYB10   | 56.73 | 104 | 45  | 0  | 115 | 426  | 14  | 117 | 4.00E-40 | 138  |
| TcMYB35 | ATMYB11   | 54.81 | 104 | 47  | 0  | 115 | 426  | 12  | 115 | 5.00E-40 | 141  |
| TcMYB35 | AtMYB47   | 40.57 | 175 | 102 | 3  | 97  | 615  | 8   | 180 | 6.00E-40 | 139  |
| TcMYB35 | ATMYB84   | 58.49 | 106 | 43  | 1  | 112 | 426  | 11  | 116 | 8.00E-40 | 139  |
| TcMYB35 | ATMYB68   | 57.55 | 106 | 44  | 1  | 112 | 426  | 11  | 116 | 3.00E-39 | 139  |
| TcMYB35 | ATMYB26   | 41.67 | 156 | 82  | 2  | 115 | 555  | 12  | 158 | 1.00E-38 | 137  |
| TcMYB35 | AtMYB114  | 49.04 | 104 | 53  | 0  | 115 | 426  | 8   | 111 | 3.00E-38 | 130  |
| TcMYB35 | ATMYB38   | 54.72 | 106 | 47  | 1  | 112 | 426  | 11  | 116 | 3.00E-38 | 135  |
| TcMYB35 | ATMYB37   | 53.33 | 105 | 48  | 1  | 115 | 426  | 12  | 116 | 2.00E-37 | 134  |
| TcMYB35 | AtMYB45   | 45.83 | 144 | 68  | 2  | 118 | 519  | 19  | 162 | 3.00E-37 | 131  |
| TcMYB35 | AtMYB19   | 46.62 | 133 | 71  | 0  | 118 | 516  | 13  | 145 | 1.00E-36 | 129  |
| TcMYB35 | ATMYB75   | 48.08 | 104 | 54  | 0  | 115 | 426  | 8   | 111 | 2.00E-36 | 128  |
| TcMYB35 | AtMYB27   | 52.83 | 106 | 50  | 0  | 112 | 429  | 8   | 113 | 2.00E-36 | 128  |
| TcMYB35 | ATMYB78   | 44.78 | 134 | 60  | 2  | 115 | 474  | 26  | 155 | 3.00E-36 | 130  |
| TcMYB35 | AtMYB113  | 48.08 | 104 | 54  | 0  | 115 | 426  | 8   | 111 | 8.00E-36 | 127  |
| TcMYB35 | ATMYB90   | 48.08 | 104 | 54  | 0  | 115 | 426  | 8   | 111 | 4.00E-35 | 125  |
| TcMYB35 | AtMYB18   | 50.49 | 103 | 51  | 0  | 118 | 426  | 11  | 113 | 8.00E-33 | 119  |
| TcMYB35 | AtMYB98   | 46.21 | 132 | 70  | 4  | 37  | 429  | 197 | 317 | 1.00E-31 | 119  |
| TcMYB35 | AtMYB70   | 52.94 | 102 | 48  | 1  | 121 | 426  | 13  | 113 | 8.00E-31 | 114  |
| TcMYB35 | ATMYB119  | 50.47 | 107 | 52  | 3  | 112 | 429  | 102 | 205 | 2.00E-30 | 116  |
| TcMYB35 | ATMYB118  | 42.86 | 140 | 79  | 4  | 112 | 528  | 186 | 312 | 2.00E-30 | 115  |
| TcMYB35 | ATMYB73   | 50.98 | 102 | 50  | 1  | 121 | 426  | 13  | 113 | 3.00E-30 | 113  |
| TcMYB35 | AtMYB1    | 53.92 | 102 | 47  | 1  | 121 | 426  | 55  | 155 | 6.00E-30 | 114  |
| TcMYB35 | AtMYB109  | 39.41 | 170 | 99  | 5  | 103 | 600  | 47  | 204 | 7.00E-30 | 114  |
| TcMYB35 | AtMYB115  | 50.5  | 101 | 50  | 1  | 121 | 423  | 158 | 257 | 7.00E-30 | 113  |
| TcMYB35 | AtMYB64   | 50    | 104 | 51  | 3  | 121 | 429  | 105 | 205 | 3.00E-29 | 112  |
| TcMYB35 | AtMYB100  | 34.72 | 193 | 113 | 5  | 79  | 618  | 17  | 203 | 1.00E-28 | 106  |
| TcMYB35 | ATMYB25   | 46.4  | 125 | 65  | 3  | 58  | 426  | 28  | 150 | 1.00E-28 | 109  |
| TcMYB35 | ATMYB77   | 46.73 | 107 | 57  | 1  | 121 | 441  | 6   | 111 | 5.00E-28 | 106  |
| TcMYB35 | ATMYB44   | 49.02 | 102 | 52  | 1  | 121 | 426  | 6   | 106 | 5.00E-28 | 106  |
| TcMYB35 | ATMYB105  | 37.35 | 166 | 90  | 4  | 94  | 549  | 98  | 259 | 8.00E-28 | 106  |
| TcMYB35 | ATMYB54   | 32.32 | 198 | 131 | 5  | 121 | 705  | 6   | 198 | 9.00E-28 | 104  |
| TcMYB35 | ATMYB52   | 46.96 | 115 | 60  | 2  | 121 | 462  | 5   | 117 | 1.00E-27 | 104  |
| TcMYB35 | AtMYB117  | 46.02 | 113 | 60  | 2  | 115 | 450  | 96  | 206 | 3.00E-27 | 105  |
| TcMYB35 | ATMYB110  | 34.64 | 179 | 117 | 3  | 31  | 567  | 41  | 201 | 3.00E-27 | 104  |
| TcMYB35 | AtMYB56   | 43.9  | 123 | 67  | 2  | 73  | 435  | 75  | 196 | 1.00E-26 | 103  |
| TcMYB35 | ATMYB69   | 44.44 | 108 | 60  | 1  | 112 | 435  | 16  | 122 | 6.00E-26 | 99.4 |
| TcMYB35 | AtMYB22   | 29.91 | 224 | 148 | 5  | 34  | 678  | 29  | 245 | 1.00E-24 | 95.9 |
| TcMYB35 | ATMYB91   | 40.38 | 104 | 60  | 1  | 130 | 435  | 7   | 110 | 2.00E-23 | 94.4 |
| TcMYB35 | AtMYB89   | 39    | 100 | 61  | 1  | 124 | 423  | 57  | 155 | 5.00E-19 | 77.8 |
| TcMYB35 | AtMYB124  | 34.65 | 101 | 66  | 1  | 130 | 432  | 28  | 127 | 3.00E-17 | 76.3 |
| TcMYB35 | ATMYB88   | 30.08 | 133 | 89  | 3  | 46  | 432  | 4   | 132 | 2.00E-15 | 70.9 |
| TcMYB36 | ATMYB65   | 38.36 | 451 | 262 | 13 | 13  | 1317 | 12  | 414 | 2.00E-79 | 251  |
| TcMYB36 | ATMYB33   | 42.96 | 398 | 214 | 14 | 43  | 1197 | 8   | 374 | 9.00E-79 | 248  |
| TcMYB36 | ATMYB101  | 40.25 | 395 | 224 | 9  | 106 | 1254 | 15  | 359 | 8.00E-74 | 234  |
| TcMYB36 | ATMYB120  | 60    | 190 | 57  | 3  | 64  | 576  | 9   | 188 | 2.00E-71 | 229  |
| TcMYB36 | AtMYB81   | 37.77 | 413 | 242 | 13 | 112 | 1305 | 19  | 379 | 4.00E-68 | 218  |
| TcMYB36 | AtMYB97   | 61.96 | 163 | 62  | 1  | 88  | 576  | 10  | 154 | 3.00E-67 | 214  |
| TcMYB36 | ATMYB102  | 34.19 | 351 | 218 | 11 | 115 | 1128 | 12  | 322 | 1.00E-50 | 169  |
| TcMYB36 | AtMYB74   | 51.33 | 150 | 70  | 2  | 115 | 555  | 13  | 162 | 2.00E-49 | 165  |
| TcMYB36 | AtMYB9    | 38.91 | 239 | 136 | 5  | 115 | 801  | 12  | 246 | 2.00E-49 | 165  |
| TcMYB36 | AtMYB107  | 66.35 | 104 | 35  | 0  | 115 | 426  | 12  | 115 | 3.00E-48 | 162  |
| TcMYB36 | ATMYB66   | 43.18 | 176 | 83  | 2  | 76  | 552  | 3   | 178 | 5.00E-48 | 157  |
| TcMYB36 | AtMYB17   | 64.42 | 104 | 37  | 0  | 115 | 426  | 12  | 115 | 7.00E-48 | 160  |
| TcMYB36 | AtMYB41   | 45.98 | 174 | 91  | 3  | 115 | 627  | 12  | 182 | 2.00E-47 | 158  |
| TcMYB36 | ATMYB3    | 63.46 | 104 | 38  | 0  | 115 | 426  | 12  | 115 | 3.00E-47 | 157  |
| TcMYB36 | ATMYB15   | 38.14 | 236 | 142 | 5  | 115 | 810  | 12  | 231 | 5.00E-47 | 157  |
| TcMYB36 | AtMYB6    | 65.69 | 102 | 35  | 0  | 121 | 426  | 14  | 115 | 7.00E-47 | 155  |

|         |           |       |     |     |    |     |      |    |     |          |     |
|---------|-----------|-------|-----|-----|----|-----|------|----|-----|----------|-----|
| TcMYB36 | MYB8      | 62.5  | 104 | 39  | 0  | 115 | 426  | 12 | 115 | 1.00E-46 | 154 |
| TcMYB36 | ATMYB5    | 50.74 | 136 | 63  | 3  | 115 | 510  | 23 | 155 | 3.00E-46 | 154 |
| TcMYB36 | ATMYB67   | 43.75 | 176 | 98  | 2  | 103 | 627  | 18 | 190 | 3.00E-46 | 156 |
| TcMYB36 | MYB7      | 63.46 | 104 | 38  | 0  | 115 | 426  | 12 | 115 | 3.00E-46 | 155 |
| TcMYB36 | ATMYB13   | 50.33 | 153 | 75  | 3  | 115 | 570  | 12 | 150 | 9.00E-46 | 153 |
| TcMYB36 | ATMYB57   | 48.59 | 142 | 73  | 1  | 109 | 534  | 23 | 142 | 1.00E-45 | 151 |
| TcMYB36 | AtMYB79   | 61.9  | 105 | 40  | 0  | 118 | 432  | 7  | 111 | 1.00E-45 | 153 |
| TcMYB36 | ATMYB63   | 47.37 | 152 | 75  | 1  | 115 | 555  | 14 | 165 | 2.00E-45 | 154 |
| TcMYB36 | ATMYB4    | 64.71 | 102 | 36  | 0  | 121 | 426  | 14 | 115 | 2.00E-45 | 153 |
| TcMYB36 | ATMYB14   | 48.05 | 154 | 80  | 1  | 115 | 576  | 12 | 164 | 3.00E-45 | 152 |
| TcMYB36 | ATMYB92   | 63.46 | 104 | 38  | 0  | 115 | 426  | 12 | 115 | 5.00E-45 | 154 |
| TcMYB36 | ATMYB58   | 42.16 | 185 | 97  | 4  | 115 | 639  | 14 | 182 | 5.00E-45 | 152 |
| TcMYB36 | ATMYB71   | 56.3  | 119 | 46  | 1  | 94  | 432  | 5  | 123 | 7.00E-45 | 151 |
| TcMYB36 | ATMYB121  | 47.71 | 153 | 80  | 1  | 118 | 576  | 28 | 178 | 8.00E-45 | 151 |
| TcMYB36 | AtMYB32   | 62.75 | 102 | 38  | 0  | 121 | 426  | 14 | 115 | 1.00E-44 | 151 |
| TcMYB36 | ATMYB3    | 41.42 | 169 | 95  | 2  | 94  | 588  | 13 | 181 | 1.00E-44 | 149 |
| TcMYB36 | AtMYB53   | 60.58 | 104 | 41  | 0  | 115 | 426  | 12 | 115 | 2.00E-44 | 151 |
| TcMYB36 | AtMYB49   | 61.54 | 104 | 40  | 0  | 115 | 426  | 12 | 115 | 4.00E-44 | 150 |
| TcMYB36 | ATMYB30   | 59.43 | 106 | 43  | 0  | 109 | 426  | 10 | 115 | 5.00E-44 | 150 |
| TcMYB36 | AtMYB51   | 42.08 | 202 | 115 | 5  | 115 | 714  | 13 | 194 | 5.00E-44 | 151 |
| TcMYB36 | ATMYB16   | 59.62 | 104 | 42  | 0  | 115 | 426  | 12 | 115 | 5.00E-44 | 150 |
| TcMYB36 | ATMYB106  | 60.58 | 104 | 41  | 0  | 115 | 426  | 55 | 158 | 6.00E-44 | 152 |
| TcMYB36 | AtMYB60   | 45.64 | 149 | 81  | 1  | 115 | 561  | 12 | 152 | 6.00E-44 | 149 |
| TcMYB36 | AtMYB93   | 61.54 | 104 | 40  | 0  | 115 | 426  | 12 | 115 | 7.00E-44 | 151 |
| TcMYB36 | ATMYB28   | 47.44 | 156 | 78  | 3  | 106 | 561  | 9  | 164 | 1.00E-43 | 150 |
| TcMYB36 | AtMYB24   | 52.94 | 119 | 50  | 1  | 85  | 423  | 1  | 119 | 2.00E-43 | 145 |
| TcMYB36 | ATMYB29   | 60.38 | 106 | 42  | 0  | 106 | 423  | 9  | 114 | 2.00E-43 | 149 |
| TcMYB36 | ATMYB86   | 53.54 | 127 | 58  | 2  | 115 | 492  | 12 | 135 | 3.00E-43 | 149 |
| TcMYB36 | ATMYB23   | 57.28 | 103 | 44  | 0  | 118 | 426  | 13 | 115 | 3.00E-43 | 145 |
| TcMYB36 | AtMYB20   | 57.94 | 107 | 45  | 0  | 115 | 435  | 12 | 118 | 3.00E-43 | 147 |
| TcMYB36 | AtMYB116  | 52.63 | 114 | 54  | 0  | 94  | 435  | 11 | 124 | 4.00E-43 | 147 |
| TcMYB36 | AtMYB50   | 60.58 | 104 | 41  | 0  | 115 | 426  | 12 | 115 | 4.00E-43 | 148 |
| TcMYB36 | AtMYB76   | 58.88 | 107 | 44  | 0  | 106 | 426  | 9  | 115 | 5.00E-43 | 148 |
| TcMYB36 | ATMYB34   | 58.88 | 107 | 44  | 0  | 115 | 435  | 12 | 118 | 7.00E-43 | 147 |
| TcMYB36 | ATMYB96   | 47.52 | 141 | 74  | 1  | 115 | 537  | 12 | 142 | 7.00E-43 | 148 |
| TcMYB36 | ATMYB99   | 51.49 | 134 | 57  | 2  | 115 | 492  | 13 | 146 | 7.00E-43 | 145 |
| TcMYB36 | ATMYB31   | 59.62 | 104 | 42  | 0  | 115 | 426  | 12 | 115 | 8.00E-43 | 147 |
| TcMYB36 | AtMYB103  | 43.53 | 170 | 94  | 3  | 115 | 618  | 12 | 174 | 1.00E-42 | 148 |
| TcMYB36 | ATMYB94   | 57.01 | 107 | 46  | 0  | 115 | 435  | 12 | 118 | 2.00E-42 | 146 |
| TcMYB36 | ATMYB46   | 42.11 | 171 | 99  | 2  | 115 | 627  | 18 | 174 | 2.00E-42 | 145 |
| TcMYB36 | AtMYB43   | 53.91 | 128 | 57  | 2  | 115 | 492  | 12 | 139 | 3.00E-42 | 146 |
| TcMYB36 | ATMYB111  | 57.69 | 104 | 44  | 0  | 115 | 426  | 12 | 115 | 3.00E-42 | 146 |
| TcMYB36 | ATMYB0    | 43.51 | 154 | 87  | 1  | 79  | 540  | 2  | 154 | 3.00E-42 | 143 |
| TcMYB36 | ATMYB87   | 58.49 | 106 | 43  | 1  | 112 | 426  | 11 | 116 | 3.00E-42 | 145 |
| TcMYB36 | AtMYB85   | 57.69 | 104 | 44  | 0  | 115 | 426  | 12 | 115 | 5.00E-42 | 144 |
| TcMYB36 | ATMYB80   | 36.62 | 213 | 126 | 5  | 112 | 723  | 11 | 221 | 6.00E-42 | 145 |
| TcMYB36 | ATMYB61   | 35.9  | 312 | 195 | 13 | 115 | 1035 | 12 | 291 | 7.00E-42 | 146 |
| TcMYB36 | ATMYB72   | 46.38 | 138 | 73  | 1  | 115 | 525  | 14 | 151 | 1.00E-41 | 144 |
| TcMYB36 | ATMYB123  | 55.77 | 104 | 46  | 0  | 115 | 426  | 14 | 117 | 1.00E-41 | 142 |
| TcMYB36 | AtMYB62   | 55.14 | 107 | 48  | 0  | 115 | 435  | 19 | 125 | 1.00E-41 | 143 |
| TcMYB36 | AtMYB82   | 52.14 | 117 | 53  | 1  | 103 | 444  | 8  | 124 | 1.00E-41 | 140 |
| TcMYB36 | AtMYB112  | 50    | 120 | 60  | 1  | 115 | 474  | 32 | 147 | 1.00E-41 | 142 |
| TcMYB36 | AtMYB42   | 57.69 | 104 | 44  | 0  | 115 | 426  | 12 | 115 | 1.00E-41 | 143 |
| TcMYB36 | ATMYB48   | 37.93 | 203 | 93  | 4  | 118 | 627  | 8  | 210 | 3.00E-41 | 141 |
| TcMYB36 | AtMYB108  | 51.67 | 120 | 58  | 1  | 115 | 474  | 19 | 134 | 3.00E-41 | 143 |
| TcMYB36 | ATMYB95   | 56.36 | 110 | 48  | 1  | 97  | 426  | 8  | 115 | 4.00E-41 | 141 |
| TcMYB36 | ATMYB122  | 45.12 | 164 | 82  | 3  | 115 | 582  | 12 | 175 | 6.00E-41 | 142 |
| TcMYB36 | AtMYB36   | 51.06 | 141 | 64  | 4  | 112 | 519  | 11 | 146 | 6.00E-41 | 142 |
| TcMYB36 | ATMYB12   | 55.77 | 104 | 46  | 0  | 115 | 426  | 12 | 115 | 7.00E-41 | 143 |
| TcMYB36 | ATMYB2    | 54.72 | 106 | 48  | 0  | 115 | 432  | 20 | 125 | 7.00E-41 | 140 |
| TcMYB36 | AtMYB83   | 44.37 | 151 | 75  | 2  | 115 | 540  | 30 | 180 | 8.00E-41 | 142 |
| TcMYB36 | ATMYB35   | 54.29 | 105 | 48  | 0  | 112 | 426  | 11 | 115 | 8.00E-41 | 142 |
| TcMYB36 | ATMYB55   | 55.08 | 118 | 41  | 1  | 115 | 432  | 12 | 129 | 8.00E-41 | 142 |
| TcMYB36 | AtMYB40   | 50.38 | 131 | 64  | 2  | 115 | 504  | 12 | 139 | 1.00E-40 | 140 |
| TcMYB36 | ATMYB59-3 | 53.98 | 113 | 51  | 1  | 118 | 453  | 9  | 121 | 1.00E-40 | 139 |
| TcMYB36 | AtMYB104  | 41.57 | 166 | 95  | 1  | 121 | 612  | 18 | 183 | 2.00E-40 | 142 |
| TcMYB36 | AtMYB10   | 56.73 | 104 | 45  | 0  | 115 | 426  | 14 | 117 | 2.00E-40 | 138 |
| TcMYB36 | ATMYB11   | 54.81 | 104 | 47  | 0  | 115 | 426  | 12 | 115 | 3.00E-40 | 141 |
| TcMYB36 | AtMYB47   | 40.57 | 175 | 102 | 3  | 97  | 615  | 8  | 180 | 3.00E-40 | 139 |
| TcMYB36 | ATMYB84   | 58.49 | 106 | 43  | 1  | 112 | 426  | 11 | 116 | 5.00E-40 | 139 |
| TcMYB36 | ATMYB68   | 57.55 | 106 | 44  | 1  | 112 | 426  | 11 | 116 | 2.00E-39 | 139 |
| TcMYB36 | ATMYB26   | 41.67 | 156 | 82  | 2  | 115 | 555  | 12 | 158 | 8.00E-39 | 137 |
| TcMYB36 | AtMYB114  | 49.04 | 104 | 53  | 0  | 115 | 426  | 8  | 111 | 2.00E-38 | 130 |
| TcMYB36 | ATMYB38   | 54.72 | 106 | 47  | 1  | 112 | 426  | 11 | 116 | 2.00E-38 | 135 |
| TcMYB36 | ATMYB37   | 53.33 | 105 | 48  | 1  | 115 | 426  | 12 | 116 | 1.00E-37 | 134 |
| TcMYB36 | AtMYB45   | 45.83 | 144 | 68  | 2  | 118 | 519  | 19 | 162 | 2.00E-37 | 131 |
| TcMYB36 | AtMYB19   | 46.62 | 133 | 71  | 0  | 118 | 516  | 13 | 145 | 9.00E-37 | 129 |
| TcMYB36 | ATMYB75   | 48.08 | 104 | 54  | 0  | 115 | 426  | 8  | 111 | 1.00E-36 | 128 |
| TcMYB36 | AtMYB27   | 52.83 | 106 | 50  | 0  | 112 | 429  | 8  | 113 | 1.00E-36 | 128 |
| TcMYB36 | ATMYB78   | 44.78 | 134 | 60  | 2  | 115 | 474  | 26 | 155 | 2.00E-36 | 130 |

|         |           |       |     |     |   |     |     |     |     |          |      |
|---------|-----------|-------|-----|-----|---|-----|-----|-----|-----|----------|------|
| TcMYB36 | AtMYB113  | 48.08 | 104 | 54  | 0 | 115 | 426 | 8   | 111 | 5.00E-36 | 127  |
| TcMYB36 | ATMYB90   | 48.08 | 104 | 54  | 0 | 115 | 426 | 8   | 111 | 3.00E-35 | 125  |
| TcMYB36 | AtMYB18   | 50.49 | 103 | 51  | 0 | 118 | 426 | 11  | 113 | 5.00E-33 | 119  |
| TcMYB36 | AtMYB98   | 46.21 | 132 | 70  | 4 | 37  | 429 | 197 | 317 | 9.00E-32 | 119  |
| TcMYB36 | AtMYB70   | 52.94 | 102 | 48  | 1 | 121 | 426 | 13  | 113 | 6.00E-31 | 114  |
| TcMYB36 | ATMYB119  | 50.47 | 107 | 52  | 3 | 112 | 429 | 102 | 205 | 1.00E-30 | 116  |
| TcMYB36 | ATMYB118  | 42.86 | 140 | 79  | 4 | 112 | 528 | 186 | 312 | 2.00E-30 | 115  |
| TcMYB36 | ATMYB73   | 50.98 | 102 | 50  | 1 | 121 | 426 | 13  | 113 | 2.00E-30 | 113  |
| TcMYB36 | AtMYB1    | 53.92 | 102 | 47  | 1 | 121 | 426 | 55  | 155 | 4.00E-30 | 114  |
| TcMYB36 | AtMYB109  | 39.41 | 170 | 99  | 5 | 103 | 600 | 47  | 204 | 5.00E-30 | 114  |
| TcMYB36 | AtMYB115  | 50.5  | 101 | 50  | 1 | 121 | 423 | 158 | 257 | 5.00E-30 | 113  |
| TcMYB36 | AtMYB64   | 50    | 104 | 51  | 3 | 121 | 429 | 105 | 205 | 2.00E-29 | 112  |
| TcMYB36 | ATMYB25   | 46.4  | 125 | 65  | 3 | 58  | 426 | 28  | 150 | 9.00E-29 | 109  |
| TcMYB36 | AtMYB100  | 34.72 | 193 | 113 | 5 | 79  | 618 | 17  | 203 | 9.00E-29 | 106  |
| TcMYB36 | ATMYB77   | 46.73 | 107 | 57  | 1 | 121 | 441 | 6   | 111 | 4.00E-28 | 106  |
| TcMYB36 | ATMYB44   | 49.02 | 102 | 52  | 1 | 121 | 426 | 6   | 106 | 4.00E-28 | 106  |
| TcMYB36 | ATMYB105  | 37.35 | 166 | 90  | 4 | 94  | 549 | 98  | 259 | 6.00E-28 | 106  |
| TcMYB36 | ATMYB54   | 32.32 | 198 | 131 | 5 | 121 | 705 | 6   | 198 | 7.00E-28 | 104  |
| TcMYB36 | ATMYB52   | 46.96 | 115 | 60  | 2 | 121 | 462 | 5   | 117 | 8.00E-28 | 104  |
| TcMYB36 | AtMYB117  | 46.02 | 113 | 60  | 2 | 115 | 450 | 96  | 206 | 2.00E-27 | 105  |
| TcMYB36 | ATMYB110  | 34.64 | 179 | 117 | 3 | 31  | 567 | 41  | 201 | 2.00E-27 | 104  |
| TcMYB36 | AtMYB56   | 43.9  | 123 | 67  | 2 | 73  | 435 | 75  | 196 | 9.00E-27 | 103  |
| TcMYB36 | ATMYB69   | 44.44 | 108 | 60  | 1 | 112 | 435 | 16  | 122 | 5.00E-26 | 99.4 |
| TcMYB36 | AtMYB22   | 29.91 | 224 | 148 | 5 | 34  | 678 | 29  | 245 | 9.00E-25 | 95.9 |
| TcMYB36 | ATMYB91   | 40.38 | 104 | 60  | 1 | 130 | 435 | 7   | 110 | 2.00E-23 | 94.4 |
| TcMYB36 | AtMYB89   | 39    | 100 | 61  | 1 | 124 | 423 | 57  | 155 | 5.00E-19 | 77.8 |
| TcMYB36 | AtMYB124  | 34.65 | 101 | 66  | 1 | 130 | 432 | 28  | 127 | 3.00E-17 | 76.3 |
| TcMYB36 | ATMYB88   | 30.08 | 133 | 89  | 3 | 46  | 432 | 4   | 132 | 2.00E-15 | 70.9 |
| TcMYB37 | ATMYB77   | 44.1  | 229 | 115 | 5 | 4   | 651 | 16  | 211 | 3.00E-56 | 179  |
| TcMYB37 | ATMYB44   | 43.57 | 241 | 130 | 8 | 4   | 708 | 16  | 221 | 5.00E-54 | 173  |
| TcMYB37 | ATMYB73   | 43.57 | 241 | 128 | 5 | 13  | 711 | 26  | 223 | 2.00E-53 | 172  |
| TcMYB37 | AtMYB109  | 44.06 | 202 | 113 | 3 | 10  | 615 | 68  | 262 | 8.00E-51 | 167  |
| TcMYB37 | AtMYB70   | 79.31 | 87  | 18  | 0 | 16  | 276 | 27  | 113 | 7.00E-46 | 152  |
| TcMYB37 | AtMYB70   | 23.94 | 213 | 124 | 7 | 136 | 660 | 15  | 224 | 5.00E-08 | 46.2 |
| TcMYB37 | AtMYB1    | 41.46 | 205 | 119 | 4 | 10  | 621 | 67  | 261 | 9.00E-45 | 151  |
| TcMYB37 | ATMYB25   | 68.54 | 89  | 28  | 0 | 10  | 276 | 62  | 150 | 3.00E-41 | 141  |
| TcMYB37 | ATMYB54   | 46.61 | 118 | 58  | 1 | 16  | 354 | 20  | 137 | 3.00E-35 | 122  |
| TcMYB37 | ATMYB105  | 45.08 | 122 | 67  | 0 | 13  | 378 | 120 | 241 | 3.00E-34 | 122  |
| TcMYB37 | AtMYB117  | 47.41 | 116 | 58  | 1 | 13  | 351 | 111 | 226 | 7.00E-34 | 121  |
| TcMYB37 | ATMYB52   | 53.41 | 88  | 41  | 0 | 13  | 276 | 18  | 105 | 1.00E-33 | 118  |
| TcMYB37 | ATMYB69   | 54.55 | 88  | 40  | 0 | 13  | 276 | 32  | 119 | 6.00E-33 | 116  |
| TcMYB37 | AtMYB98   | 47.15 | 123 | 65  | 0 | 13  | 381 | 230 | 352 | 7.00E-33 | 120  |
| TcMYB37 | AtMYB56   | 55.68 | 88  | 39  | 0 | 13  | 276 | 106 | 193 | 2.00E-32 | 117  |
| TcMYB37 | ATMYB110  | 31.39 | 223 | 148 | 4 | 4   | 657 | 77  | 277 | 9.00E-32 | 114  |
| TcMYB37 | ATMYB48   | 36.77 | 155 | 94  | 5 | 19  | 471 | 24  | 172 | 6.00E-30 | 108  |
| TcMYB37 | ATMYB119  | 40.32 | 124 | 74  | 1 | 13  | 384 | 118 | 229 | 1.00E-28 | 108  |
| TcMYB37 | AtMYB64   | 44.04 | 109 | 61  | 1 | 13  | 339 | 118 | 222 | 4.00E-28 | 106  |
| TcMYB37 | AtMYB64   | 37.78 | 45  | 27  | 1 | 139 | 270 | 108 | 152 | 1.00E-04 | 35.8 |
| TcMYB37 | ATMYB118  | 47.75 | 111 | 57  | 2 | 13  | 342 | 202 | 311 | 5.00E-28 | 106  |
| TcMYB37 | AtMYB9    | 28.67 | 286 | 170 | 8 | 19  | 774 | 29  | 307 | 3.00E-27 | 103  |
| TcMYB37 | ATMYB59-3 | 45.63 | 103 | 54  | 2 | 19  | 321 | 25  | 126 | 4.00E-27 | 100  |
| TcMYB37 | AtMYB41   | 33.95 | 215 | 132 | 5 | 31  | 645 | 33  | 241 | 5.00E-27 | 101  |
| TcMYB37 | ATMYB28   | 37.66 | 154 | 79  | 4 | 73  | 483 | 48  | 200 | 7.00E-27 | 102  |
| TcMYB37 | ATMYB95   | 46.43 | 112 | 60  | 1 | 73  | 408 | 48  | 158 | 8.00E-27 | 100  |
| TcMYB37 | AtMYB97   | 48.15 | 108 | 48  | 2 | 19  | 318 | 36  | 143 | 1.00E-26 | 102  |
| TcMYB37 | AtMYB27   | 35.98 | 164 | 103 | 3 | 13  | 498 | 24  | 168 | 1.00E-26 | 99.4 |
| TcMYB37 | ATMYB67   | 46.43 | 112 | 57  | 3 | 31  | 357 | 43  | 153 | 1.00E-26 | 100  |
| TcMYB37 | ATMYB63   | 39.61 | 154 | 86  | 5 | 19  | 459 | 31  | 180 | 2.00E-26 | 99.8 |
| TcMYB37 | AtMYB115  | 49.43 | 87  | 44  | 0 | 13  | 273 | 171 | 257 | 3.00E-26 | 100  |
| TcMYB37 | AtMYB115  | 31.11 | 45  | 30  | 1 | 139 | 270 | 161 | 205 | 8.00E-04 | 33.1 |
| TcMYB37 | ATMYB35   | 40.77 | 130 | 74  | 3 | 31  | 411 | 33  | 162 | 3.00E-26 | 99.8 |
| TcMYB37 | ATMYB46   | 34.46 | 177 | 115 | 3 | 43  | 570 | 43  | 193 | 5.00E-26 | 98.6 |
| TcMYB37 | AtMYB100  | 51.81 | 83  | 39  | 1 | 28  | 273 | 43  | 125 | 7.00E-26 | 97.1 |
| TcMYB37 | ATMYB65   | 52.22 | 90  | 42  | 1 | 19  | 285 | 58  | 147 | 7.00E-26 | 101  |
| TcMYB37 | ATMYB101  | 50.54 | 93  | 45  | 1 | 10  | 285 | 32  | 124 | 7.00E-26 | 100  |
| TcMYB37 | AtMYB51   | 42.02 | 119 | 68  | 3 | 73  | 426 | 49  | 158 | 8.00E-26 | 99.4 |
| TcMYB37 | AtMYB36   | 44.86 | 107 | 56  | 2 | 40  | 351 | 37  | 143 | 8.00E-26 | 99   |
| TcMYB37 | ATMYB72   | 42.47 | 146 | 76  | 5 | 19  | 432 | 31  | 168 | 1.00E-25 | 97.8 |
| TcMYB37 | ATMYB26   | 49.45 | 91  | 46  | 0 | 73  | 345 | 57  | 147 | 2.00E-25 | 98.2 |
| TcMYB37 | ATMYB120  | 54.65 | 86  | 38  | 1 | 19  | 273 | 43  | 128 | 3.00E-25 | 99.4 |
| TcMYB37 | AtMYB89   | 43.68 | 87  | 49  | 0 | 13  | 273 | 69  | 155 | 3.00E-25 | 94   |
| TcMYB37 | ATMYB121  | 38.67 | 150 | 90  | 5 | 13  | 456 | 42  | 182 | 6.00E-25 | 95.5 |
| TcMYB37 | AtMYB47   | 42.02 | 119 | 65  | 2 | 73  | 417 | 48  | 165 | 7.00E-25 | 95.1 |
| TcMYB37 | ATMYB37   | 51.52 | 99  | 46  | 2 | 19  | 309 | 29  | 127 | 7.00E-25 | 96.3 |
| TcMYB37 | ATMYB33   | 51.11 | 90  | 43  | 1 | 19  | 285 | 49  | 138 | 7.00E-25 | 98.2 |
| TcMYB37 | AtMYB17   | 50.55 | 91  | 43  | 2 | 19  | 285 | 29  | 118 | 8.00E-25 | 95.5 |
| TcMYB37 | AtMYB83   | 43.22 | 118 | 67  | 2 | 73  | 426 | 66  | 175 | 2.00E-24 | 95.5 |
| TcMYB37 | ATMYB34   | 56.25 | 80  | 35  | 1 | 73  | 312 | 48  | 126 | 2.00E-24 | 94.4 |
| TcMYB37 | ATMYB57   | 38.03 | 142 | 85  | 3 | 43  | 459 | 50  | 191 | 3.00E-24 | 92   |
| TcMYB37 | AtMYB50   | 33.77 | 154 | 98  | 4 | 19  | 468 | 29  | 181 | 3.00E-24 | 94.4 |

|         |          |       |     |     |   |     |     |    |     |          |      |
|---------|----------|-------|-----|-----|---|-----|-----|----|-----|----------|------|
| TcMYB37 | AtMYB10  | 34.36 | 195 | 124 | 6 | 25  | 597 | 33 | 210 | 4.00E-24 | 92.4 |
| TcMYB37 | ATMYB102 | 41.04 | 134 | 77  | 3 | 19  | 414 | 29 | 159 | 4.00E-24 | 94.4 |
| TcMYB37 | ATMYB29  | 35.77 | 137 | 88  | 2 | 73  | 483 | 48 | 182 | 5.00E-24 | 94   |
| TcMYB37 | ATMYB80  | 50.6  | 83  | 40  | 1 | 31  | 276 | 33 | 115 | 6.00E-24 | 93.6 |
| TcMYB37 | ATMYB4   | 46.6  | 103 | 54  | 1 | 73  | 378 | 48 | 150 | 6.00E-24 | 92.8 |
| TcMYB37 | ATMYB3   | 49.47 | 95  | 44  | 2 | 73  | 345 | 48 | 142 | 7.00E-24 | 92   |
| TcMYB37 | ATMYB92  | 48.89 | 90  | 44  | 2 | 19  | 282 | 29 | 117 | 9.00E-24 | 93.2 |
| TcMYB37 | ATMYB123 | 43.97 | 116 | 65  | 2 | 73  | 420 | 50 | 159 | 1.00E-23 | 91.7 |
| TcMYB37 | AtMYB103 | 42.5  | 120 | 69  | 1 | 73  | 432 | 48 | 163 | 1.00E-23 | 93.6 |
| TcMYB37 | ATMYB38  | 46    | 100 | 52  | 2 | 19  | 312 | 29 | 128 | 1.00E-23 | 92.4 |
| TcMYB37 | AtMYB74  | 49    | 100 | 49  | 2 | 31  | 324 | 34 | 133 | 1.00E-23 | 92.8 |
| TcMYB37 | ATMYB58  | 37.97 | 158 | 96  | 6 | 19  | 486 | 31 | 173 | 1.00E-23 | 91.7 |
| TcMYB37 | AtMYB6   | 37.4  | 131 | 76  | 2 | 73  | 447 | 48 | 178 | 2.00E-23 | 90.5 |
| TcMYB37 | MYB8     | 33.33 | 141 | 92  | 2 | 31  | 447 | 33 | 173 | 2.00E-23 | 89.7 |
| TcMYB37 | ATMYB66  | 37.98 | 129 | 61  | 3 | 19  | 348 | 33 | 160 | 2.00E-23 | 89.4 |
| TcMYB37 | AtMYB60  | 37.4  | 131 | 76  | 3 | 19  | 393 | 29 | 155 | 3.00E-23 | 90.9 |
| TcMYB37 | ATMYB14  | 35.07 | 134 | 85  | 2 | 31  | 426 | 33 | 165 | 3.00E-23 | 90.1 |
| TcMYB37 | AtMYB19  | 49.43 | 87  | 44  | 1 | 73  | 333 | 48 | 133 | 3.00E-23 | 90.5 |
| TcMYB37 | AtMYB79  | 47.62 | 84  | 42  | 2 | 31  | 276 | 27 | 109 | 4.00E-23 | 90.1 |
| TcMYB37 | ATMYB61  | 48.91 | 92  | 45  | 3 | 43  | 312 | 37 | 126 | 5.00E-23 | 91.7 |
| TcMYB37 | AtMYB76  | 55.71 | 70  | 31  | 0 | 73  | 282 | 48 | 117 | 5.00E-23 | 91.3 |
| TcMYB37 | ATMYB3   | 40    | 110 | 65  | 3 | 43  | 369 | 45 | 152 | 5.00E-23 | 89   |
| TcMYB37 | AtMYB82  | 50    | 88  | 42  | 2 | 19  | 276 | 29 | 115 | 6.00E-23 | 88.2 |
| TcMYB37 | ATMYB122 | 50    | 86  | 42  | 1 | 19  | 273 | 29 | 114 | 6.00E-23 | 90.9 |
| TcMYB37 | AtMYB53  | 48.89 | 90  | 44  | 2 | 19  | 282 | 29 | 117 | 6.00E-23 | 90.5 |
| TcMYB37 | MYB7     | 51.9  | 79  | 37  | 1 | 73  | 306 | 48 | 126 | 6.00E-23 | 89.7 |
| TcMYB37 | ATMYB106 | 43.86 | 114 | 61  | 3 | 19  | 351 | 72 | 185 | 8.00E-23 | 91.3 |
| TcMYB37 | ATMYB71  | 43.3  | 97  | 53  | 3 | 19  | 303 | 35 | 127 | 8.00E-23 | 89.4 |
| TcMYB37 | ATMYB86  | 46.15 | 104 | 54  | 3 | 43  | 348 | 37 | 138 | 1.00E-22 | 90.5 |
| TcMYB37 | AtMYB18  | 48.35 | 91  | 38  | 1 | 73  | 318 | 46 | 136 | 1.00E-22 | 89.4 |
| TcMYB37 | ATMYB13  | 40.74 | 135 | 75  | 4 | 31  | 420 | 33 | 151 | 1.00E-22 | 88.6 |
| TcMYB37 | AtMYB85  | 32.95 | 173 | 97  | 3 | 73  | 534 | 48 | 219 | 1.00E-22 | 89   |
| TcMYB37 | AtMYB32  | 46.81 | 94  | 49  | 1 | 73  | 351 | 48 | 141 | 1.00E-22 | 89   |
| TcMYB37 | AtMYB49  | 47.19 | 89  | 46  | 1 | 19  | 282 | 29 | 117 | 2.00E-22 | 89.4 |
| TcMYB37 | AtMYB81  | 48.84 | 86  | 43  | 1 | 19  | 273 | 37 | 122 | 2.00E-22 | 90.5 |
| TcMYB37 | ATMYB31  | 27.38 | 252 | 173 | 8 | 19  | 744 | 29 | 242 | 2.00E-22 | 89.4 |
| TcMYB37 | AtMYB42  | 51.9  | 79  | 37  | 1 | 73  | 306 | 48 | 126 | 3.00E-22 | 88.2 |
| TcMYB37 | ATMYB111 | 33.52 | 176 | 94  | 3 | 10  | 468 | 26 | 201 | 3.00E-22 | 89   |
| TcMYB37 | AtMYB107 | 46.07 | 89  | 47  | 1 | 19  | 282 | 29 | 117 | 3.00E-22 | 88.6 |
| TcMYB37 | AtMYB116 | 39.22 | 102 | 61  | 2 | 10  | 312 | 32 | 132 | 4.00E-22 | 87.8 |
| TcMYB37 | ATMYB23  | 48.81 | 84  | 41  | 2 | 31  | 276 | 33 | 115 | 6.00E-22 | 85.9 |
| TcMYB37 | ATMYB87  | 43.88 | 98  | 53  | 2 | 19  | 306 | 29 | 126 | 7.00E-22 | 87.4 |
| TcMYB37 | ATMYB16  | 49.43 | 87  | 43  | 1 | 19  | 276 | 29 | 115 | 9.00E-22 | 87.4 |
| TcMYB37 | AtMYB45  | 40.38 | 104 | 60  | 2 | 19  | 324 | 35 | 137 | 9.00E-22 | 86.3 |
| TcMYB37 | ATMYB0   | 38.98 | 118 | 71  | 2 | 31  | 381 | 35 | 148 | 9.00E-22 | 85.5 |
| TcMYB37 | ATMYB15  | 36.77 | 155 | 78  | 5 | 31  | 435 | 33 | 186 | 1.00E-21 | 86.7 |
| TcMYB37 | ATMYB94  | 30.99 | 171 | 113 | 5 | 19  | 516 | 29 | 180 | 1.00E-21 | 87.4 |
| TcMYB37 | AtMYB62  | 31.9  | 163 | 86  | 5 | 31  | 444 | 40 | 197 | 2.00E-21 | 85.9 |
| TcMYB37 | AtMYB24  | 31.45 | 159 | 95  | 4 | 43  | 477 | 42 | 199 | 2.00E-21 | 84.3 |
| TcMYB37 | ATMYB55  | 57.35 | 68  | 29  | 0 | 73  | 276 | 60 | 127 | 2.00E-21 | 86.7 |
| TcMYB37 | AtMYB22  | 45.12 | 82  | 45  | 0 | 28  | 273 | 71 | 152 | 2.00E-21 | 85.1 |
| TcMYB37 | ATMYB5   | 41.96 | 112 | 63  | 3 | 19  | 348 | 40 | 144 | 3.00E-21 | 84.7 |
| TcMYB37 | ATMYB30  | 39.2  | 125 | 65  | 4 | 19  | 360 | 29 | 148 | 3.00E-21 | 85.9 |
| TcMYB37 | ATMYB99  | 52.86 | 70  | 33  | 0 | 73  | 282 | 56 | 125 | 3.00E-21 | 84.3 |
| TcMYB37 | ATMYB68  | 48.78 | 82  | 41  | 1 | 40  | 282 | 37 | 118 | 4.00E-21 | 86.3 |
| TcMYB37 | AtMYB20  | 51.47 | 68  | 33  | 0 | 73  | 276 | 48 | 115 | 6.00E-21 | 84.3 |
| TcMYB37 | AtMYB40  | 38.68 | 106 | 62  | 3 | 43  | 351 | 37 | 141 | 6.00E-21 | 84   |
| TcMYB37 | AtMYB93  | 41.67 | 108 | 61  | 2 | 19  | 336 | 29 | 136 | 2.00E-20 | 84.3 |
| TcMYB37 | AtMYB112 | 30.87 | 149 | 79  | 3 | 31  | 405 | 53 | 200 | 2.00E-20 | 82.4 |
| TcMYB37 | ATMYB12  | 44.83 | 87  | 47  | 1 | 19  | 276 | 29 | 115 | 2.00E-20 | 84.3 |
| TcMYB37 | ATMYB84  | 46.34 | 82  | 43  | 1 | 40  | 282 | 37 | 118 | 2.00E-20 | 83.6 |
| TcMYB37 | ATMYB11  | 44.83 | 87  | 47  | 1 | 19  | 276 | 29 | 115 | 2.00E-20 | 84   |
| TcMYB37 | AtMYB104 | 45.98 | 87  | 45  | 2 | 19  | 273 | 33 | 118 | 2.00E-20 | 84.3 |
| TcMYB37 | AtMYB43  | 52.94 | 68  | 32  | 0 | 73  | 276 | 48 | 115 | 2.00E-20 | 83.6 |
| TcMYB37 | ATMYB96  | 32.81 | 128 | 81  | 3 | 19  | 387 | 29 | 140 | 6.00E-20 | 82.4 |
| TcMYB37 | AtMYB108 | 45.78 | 83  | 43  | 2 | 31  | 273 | 40 | 121 | 6.00E-20 | 82   |
| TcMYB37 | ATMYB2   | 45.24 | 84  | 44  | 2 | 31  | 276 | 41 | 123 | 2.00E-19 | 79.7 |
| TcMYB37 | AtMYB114 | 40    | 90  | 53  | 1 | 13  | 279 | 23 | 112 | 4.00E-19 | 75.9 |
| TcMYB37 | ATMYB88  | 31.37 | 153 | 98  | 3 | 31  | 468 | 49 | 199 | 2.00E-18 | 79   |
| TcMYB37 | ATMYB75  | 39.36 | 94  | 52  | 2 | 13  | 279 | 23 | 112 | 8.00E-18 | 74.7 |
| TcMYB37 | ATMYB90  | 31.33 | 150 | 102 | 2 | 19  | 465 | 25 | 163 | 2.00E-17 | 73.9 |
| TcMYB37 | AtMYB113 | 38.3  | 94  | 53  | 2 | 13  | 279 | 23 | 112 | 2.00E-17 | 73.6 |
| TcMYB37 | AtMYB124 | 37.8  | 82  | 51  | 0 | 31  | 276 | 44 | 125 | 3.00E-17 | 75.1 |
| TcMYB37 | ATMYB78  | 41.98 | 81  | 33  | 1 | 73  | 273 | 62 | 142 | 4.00E-16 | 70.9 |
| TcMYB37 | ATMYB91  | 37.23 | 94  | 56  | 1 | 19  | 291 | 19 | 112 | 1.00E-15 | 70.1 |
| TcMYB38 | AtMYB117 | 65.32 | 173 | 60  | 2 | 262 | 780 | 61 | 225 | 1.00E-73 | 229  |
| TcMYB38 | ATMYB105 | 60.53 | 190 | 64  | 4 | 196 | 732 | 30 | 219 | 1.00E-73 | 228  |
| TcMYB38 | AtMYB56  | 68.79 | 141 | 43  | 2 | 316 | 735 | 66 | 204 | 7.00E-64 | 202  |
| TcMYB38 | ATMYB110 | 55.88 | 170 | 72  | 2 | 298 | 798 | 36 | 201 | 2.00E-63 | 201  |
| TcMYB38 | ATMYB54  | 79.82 | 109 | 22  | 0 | 385 | 711 | 3  | 111 | 8.00E-63 | 197  |

|         |           |       |     |     |    |     |      |     |     |          |      |
|---------|-----------|-------|-----|-----|----|-----|------|-----|-----|----------|------|
| TcMYB38 | ATMYB52   | 77.98 | 109 | 24  | 0  | 385 | 711  | 2   | 110 | 1.00E-62 | 196  |
| TcMYB38 | ATMYB69   | 65.62 | 128 | 44  | 1  | 334 | 717  | 1   | 126 | 3.00E-57 | 182  |
| TcMYB38 | AtMYB89   | 61.68 | 107 | 41  | 0  | 397 | 717  | 57  | 163 | 5.00E-45 | 148  |
| TcMYB38 | ATMYB44   | 59.41 | 101 | 41  | 0  | 394 | 696  | 6   | 106 | 2.00E-40 | 140  |
| TcMYB38 | AtMYB109  | 58.65 | 104 | 43  | 0  | 394 | 705  | 56  | 159 | 5.00E-40 | 141  |
| TcMYB38 | ATMYB25   | 54.39 | 114 | 52  | 0  | 364 | 705  | 40  | 153 | 5.00E-39 | 137  |
| TcMYB38 | AtMYB70   | 57.43 | 101 | 43  | 0  | 394 | 696  | 13  | 113 | 2.00E-38 | 134  |
| TcMYB38 | ATMYB73   | 56.44 | 101 | 44  | 0  | 394 | 696  | 13  | 113 | 2.00E-38 | 134  |
| TcMYB38 | ATMYB77   | 56.44 | 101 | 44  | 0  | 394 | 696  | 6   | 106 | 6.00E-38 | 133  |
| TcMYB38 | AtMYB1    | 51.85 | 108 | 52  | 0  | 394 | 717  | 55  | 162 | 4.00E-36 | 130  |
| TcMYB38 | AtMYB115  | 37.78 | 180 | 107 | 5  | 385 | 909  | 155 | 325 | 4.00E-32 | 118  |
| TcMYB38 | ATMYB119  | 37.02 | 181 | 101 | 3  | 325 | 828  | 88  | 262 | 1.00E-31 | 118  |
| TcMYB38 | AtMYB98   | 37.65 | 162 | 101 | 2  | 274 | 759  | 183 | 338 | 7.00E-31 | 116  |
| TcMYB38 | AtMYB64   | 49.11 | 112 | 57  | 1  | 394 | 729  | 105 | 213 | 3.00E-30 | 114  |
| TcMYB38 | ATMYB15   | 30.09 | 216 | 141 | 4  | 370 | 987  | 6   | 213 | 6.00E-30 | 110  |
| TcMYB38 | ATMYB23   | 45.13 | 113 | 59  | 2  | 394 | 723  | 14  | 126 | 7.00E-30 | 108  |
| TcMYB38 | AtMYB103  | 39.15 | 189 | 113 | 6  | 370 | 930  | 7   | 182 | 7.00E-30 | 112  |
| TcMYB38 | ATMYB72   | 35.87 | 184 | 112 | 5  | 370 | 903  | 9   | 188 | 2.00E-29 | 109  |
| TcMYB38 | ATMYB67   | 49.55 | 111 | 54  | 3  | 370 | 696  | 17  | 125 | 2.00E-29 | 109  |
| TcMYB38 | ATMYB63   | 36.36 | 165 | 99  | 4  | 370 | 846  | 9   | 171 | 3.00E-29 | 108  |
| TcMYB38 | ATMYB66   | 47.06 | 102 | 53  | 1  | 394 | 696  | 18  | 119 | 4.00E-29 | 106  |
| TcMYB38 | ATMYB118  | 42.11 | 133 | 74  | 3  | 322 | 711  | 162 | 291 | 8.00E-29 | 110  |
| TcMYB38 | ATMYB0    | 44.64 | 112 | 60  | 2  | 394 | 723  | 16  | 127 | 1.00E-28 | 105  |
| TcMYB38 | AtMYB10   | 44.83 | 116 | 62  | 3  | 370 | 711  | 9   | 122 | 5.00E-28 | 104  |
| TcMYB38 | AtMYB45   | 35.57 | 149 | 91  | 3  | 394 | 825  | 20  | 168 | 6.00E-28 | 104  |
| TcMYB38 | AtMYB50   | 35.16 | 182 | 105 | 5  | 367 | 873  | 5   | 184 | 6.00E-28 | 105  |
| TcMYB38 | AtMYB18   | 44.44 | 108 | 59  | 1  | 394 | 714  | 12  | 119 | 6.00E-28 | 105  |
| TcMYB38 | AtMYB114  | 43.64 | 110 | 61  | 1  | 373 | 699  | 3   | 112 | 7.00E-28 | 100  |
| TcMYB38 | AtMYB100  | 46.46 | 99  | 52  | 2  | 400 | 693  | 28  | 125 | 8.00E-28 | 103  |
| TcMYB38 | AtMYB19   | 47.12 | 104 | 53  | 2  | 394 | 699  | 14  | 116 | 1.00E-27 | 103  |
| TcMYB38 | ATMYB35   | 34.67 | 199 | 123 | 7  | 370 | 945  | 7   | 194 | 2.00E-27 | 104  |
| TcMYB38 | ATMYB121  | 40.48 | 126 | 74  | 1  | 376 | 750  | 23  | 148 | 2.00E-27 | 103  |
| TcMYB38 | ATMYB101  | 28.57 | 315 | 211 | 11 | 394 | 1296 | 20  | 321 | 3.00E-27 | 106  |
| TcMYB38 | AtMYB82   | 47.06 | 102 | 53  | 1  | 394 | 696  | 14  | 115 | 4.00E-27 | 100  |
| TcMYB38 | AtMYB27   | 38.67 | 150 | 90  | 5  | 394 | 837  | 11  | 144 | 4.00E-27 | 101  |
| TcMYB38 | ATMYB86   | 35.54 | 166 | 105 | 4  | 367 | 858  | 5   | 159 | 5.00E-27 | 103  |
| TcMYB38 | AtMYB6    | 32.43 | 185 | 115 | 6  | 373 | 897  | 2   | 180 | 6.00E-27 | 101  |
| TcMYB38 | ATMYB80   | 43.64 | 110 | 61  | 1  | 370 | 696  | 6   | 115 | 6.00E-27 | 103  |
| TcMYB38 | AtMYB97   | 40.88 | 137 | 77  | 2  | 364 | 762  | 11  | 147 | 6.00E-27 | 104  |
| TcMYB38 | ATMYB61   | 26.91 | 327 | 227 | 8  | 367 | 1311 | 5   | 313 | 6.00E-27 | 103  |
| TcMYB38 | AtMYB51   | 46.08 | 102 | 54  | 1  | 394 | 696  | 15  | 116 | 7.00E-27 | 103  |
| TcMYB38 | AtMYB36   | 34.59 | 185 | 115 | 4  | 394 | 930  | 14  | 195 | 7.00E-27 | 103  |
| TcMYB38 | AtMYB9    | 28.79 | 264 | 176 | 8  | 373 | 1128 | 2   | 258 | 8.00E-27 | 103  |
| TcMYB38 | ATMYB58   | 44.55 | 110 | 60  | 2  | 370 | 696  | 9   | 117 | 9.00E-27 | 101  |
| TcMYB38 | AtMYB53   | 49.51 | 103 | 50  | 2  | 394 | 696  | 14  | 115 | 9.00E-27 | 102  |
| TcMYB38 | ATMYB75   | 43.64 | 110 | 61  | 1  | 373 | 699  | 3   | 112 | 1.00E-26 | 100  |
| TcMYB38 | ATMYB13   | 32.97 | 182 | 120 | 4  | 394 | 933  | 14  | 174 | 1.00E-26 | 100  |
| TcMYB38 | AtMYB41   | 44.35 | 115 | 57  | 3  | 373 | 696  | 2   | 115 | 1.00E-26 | 101  |
| TcMYB38 | ATMYB65   | 34.15 | 164 | 86  | 2  | 367 | 792  | 34  | 197 | 2.00E-26 | 104  |
| TcMYB38 | ATMYB122  | 45.19 | 104 | 56  | 1  | 370 | 678  | 6   | 109 | 3.00E-26 | 101  |
| TcMYB38 | MYB8      | 31.52 | 184 | 120 | 5  | 373 | 906  | 2   | 178 | 6.00E-26 | 97.8 |
| TcMYB38 | AtMYB104  | 41.23 | 114 | 66  | 2  | 364 | 702  | 8   | 118 | 7.00E-26 | 101  |
| TcMYB38 | AtMYB49   | 46.08 | 102 | 54  | 1  | 394 | 696  | 14  | 115 | 7.00E-26 | 100  |
| TcMYB38 | ATMYB34   | 40.65 | 123 | 72  | 1  | 370 | 735  | 6   | 128 | 9.00E-26 | 99.4 |
| TcMYB38 | ATMYB55   | 40    | 125 | 62  | 2  | 367 | 702  | 5   | 129 | 1.00E-25 | 100  |
| TcMYB38 | ATMYB120  | 30.69 | 202 | 130 | 4  | 394 | 969  | 28  | 228 | 1.00E-25 | 102  |
| TcMYB38 | ATMYB92   | 48.54 | 103 | 51  | 2  | 394 | 696  | 14  | 115 | 1.00E-25 | 99.8 |
| TcMYB38 | AtMYB40   | 39.85 | 133 | 75  | 3  | 394 | 777  | 14  | 145 | 1.00E-25 | 98.2 |
| TcMYB38 | AtMYB107  | 34.36 | 195 | 119 | 7  | 370 | 927  | 7   | 195 | 1.00E-25 | 99.4 |
| TcMYB38 | ATMYB90   | 39.67 | 121 | 72  | 1  | 373 | 732  | 3   | 123 | 2.00E-25 | 97.4 |
| TcMYB38 | ATMYB33   | 36.6  | 153 | 77  | 3  | 394 | 792  | 34  | 186 | 2.00E-25 | 101  |
| TcMYB38 | ATMYB71   | 38.93 | 131 | 76  | 3  | 394 | 774  | 20  | 149 | 2.00E-25 | 97.8 |
| TcMYB38 | ATMYB46   | 40.52 | 116 | 68  | 1  | 367 | 711  | 11  | 126 | 2.00E-25 | 97.8 |
| TcMYB38 | ATMYB26   | 40.32 | 124 | 64  | 2  | 367 | 708  | 5   | 128 | 3.00E-25 | 99.4 |
| TcMYB38 | AtMYB81   | 45.37 | 108 | 58  | 1  | 382 | 702  | 18  | 125 | 3.00E-25 | 100  |
| TcMYB38 | ATMYB3    | 41.23 | 114 | 61  | 2  | 373 | 696  | 2   | 115 | 4.00E-25 | 96.7 |
| TcMYB38 | AtMYB74   | 41.82 | 110 | 63  | 1  | 370 | 696  | 7   | 116 | 5.00E-25 | 97.8 |
| TcMYB38 | AtMYB76   | 34.24 | 184 | 118 | 3  | 394 | 936  | 14  | 196 | 6.00E-25 | 97.8 |
| TcMYB38 | ATMYB28   | 27.04 | 307 | 216 | 7  | 394 | 1290 | 14  | 300 | 6.00E-25 | 98.2 |
| TcMYB38 | ATMYB59-3 | 43.4  | 106 | 58  | 2  | 394 | 705  | 10  | 114 | 7.00E-25 | 95.5 |
| TcMYB38 | ATMYB48   | 44.34 | 106 | 57  | 2  | 394 | 705  | 9   | 113 | 7.00E-25 | 95.9 |
| TcMYB38 | ATMYB123  | 36.3  | 135 | 85  | 2  | 394 | 795  | 16  | 139 | 8.00E-25 | 95.9 |
| TcMYB38 | ATMYB4    | 35.57 | 149 | 89  | 4  | 373 | 798  | 2   | 144 | 9.00E-25 | 96.3 |
| TcMYB38 | ATMYB5    | 32.12 | 165 | 108 | 3  | 394 | 876  | 25  | 189 | 9.00E-25 | 95.5 |
| TcMYB38 | ATMYB37   | 33.51 | 188 | 122 | 6  | 370 | 924  | 7   | 191 | 1.00E-24 | 97.1 |
| TcMYB38 | ATMYB102  | 42.73 | 110 | 62  | 1  | 370 | 696  | 6   | 115 | 1.00E-24 | 97.1 |
| TcMYB38 | AtMYB79   | 38.57 | 140 | 68  | 3  | 394 | 759  | 8   | 146 | 2.00E-24 | 94.7 |
| TcMYB38 | ATMYB95   | 41.18 | 102 | 59  | 1  | 394 | 696  | 14  | 115 | 2.00E-24 | 94.7 |
| TcMYB38 | AtMYB93   | 42.98 | 114 | 59  | 2  | 373 | 696  | 2   | 115 | 3.00E-24 | 96.3 |
| TcMYB38 | ATMYB84   | 44.66 | 103 | 55  | 2  | 394 | 696  | 14  | 116 | 3.00E-24 | 95.1 |

|         |          |       |     |     |    |     |      |    |     |          |      |
|---------|----------|-------|-----|-----|----|-----|------|----|-----|----------|------|
| TcMYB38 | AtMYB32  | 41.23 | 114 | 61  | 2  | 373 | 696  | 2  | 115 | 4.00E-24 | 94.4 |
| TcMYB38 | ATMYB14  | 41.07 | 112 | 63  | 2  | 370 | 696  | 6  | 115 | 4.00E-24 | 93.6 |
| TcMYB38 | AtMYB108 | 28.45 | 232 | 153 | 7  | 316 | 972  | 2  | 216 | 4.00E-24 | 95.1 |
| TcMYB38 | ATMYB16  | 41.74 | 115 | 60  | 3  | 373 | 696  | 2  | 115 | 6.00E-24 | 94.7 |
| TcMYB38 | AtMYB113 | 40.95 | 105 | 61  | 1  | 394 | 705  | 10 | 114 | 7.00E-24 | 92.8 |
| TcMYB38 | ATMYB68  | 34.42 | 154 | 93  | 4  | 394 | 831  | 14 | 167 | 1.00E-23 | 94.7 |
| TcMYB38 | AtMYB43  | 40.8  | 125 | 72  | 2  | 394 | 762  | 14 | 137 | 1.00E-23 | 94   |
| TcMYB38 | AtMYB112 | 29.46 | 224 | 155 | 6  | 316 | 978  | 18 | 199 | 1.00E-23 | 92   |
| TcMYB38 | ATMYB2   | 46.32 | 95  | 50  | 1  | 394 | 675  | 22 | 116 | 2.00E-23 | 92.4 |
| TcMYB38 | ATMYB106 | 38.6  | 114 | 69  | 1  | 358 | 696  | 45 | 158 | 2.00E-23 | 94.4 |
| TcMYB38 | AtMYB62  | 38.89 | 126 | 75  | 2  | 334 | 705  | 1  | 125 | 2.00E-23 | 92.4 |
| TcMYB38 | AtMYB17  | 44.66 | 103 | 55  | 2  | 394 | 696  | 14 | 115 | 3.00E-23 | 92.4 |
| TcMYB38 | ATMYB87  | 25.33 | 300 | 202 | 9  | 370 | 1203 | 6  | 295 | 3.00E-23 | 92.4 |
| TcMYB38 | AtMYB83  | 41.67 | 108 | 62  | 1  | 394 | 714  | 32 | 139 | 3.00E-23 | 92.8 |
| TcMYB38 | MYB7     | 38.6  | 114 | 64  | 2  | 373 | 696  | 2  | 115 | 4.00E-23 | 91.3 |
| TcMYB38 | AtMYB60  | 40.71 | 113 | 66  | 1  | 394 | 729  | 14 | 126 | 5.00E-23 | 91.3 |
| TcMYB38 | AtMYB47  | 38.24 | 102 | 62  | 1  | 394 | 696  | 14 | 115 | 5.00E-23 | 90.9 |
| TcMYB38 | ATMYB96  | 29.89 | 184 | 127 | 2  | 394 | 939  | 14 | 197 | 7.00E-23 | 92   |
| TcMYB38 | AtMYB22  | 36.36 | 132 | 84  | 2  | 298 | 693  | 27 | 152 | 8.00E-23 | 90.1 |
| TcMYB38 | ATMYB38  | 43.69 | 103 | 56  | 2  | 394 | 696  | 14 | 116 | 8.00E-23 | 90.9 |
| TcMYB38 | AtMYB116 | 27.86 | 201 | 139 | 4  | 394 | 978  | 20 | 206 | 9.00E-23 | 90.5 |
| TcMYB38 | ATMYB94  | 41.9  | 105 | 60  | 1  | 394 | 705  | 14 | 118 | 1.00E-22 | 91.3 |
| TcMYB38 | ATMYB29  | 46.88 | 96  | 50  | 1  | 394 | 678  | 14 | 109 | 1.00E-22 | 91.3 |
| TcMYB38 | AtMYB20  | 28.38 | 222 | 127 | 5  | 394 | 963  | 14 | 231 | 1.00E-22 | 90.1 |
| TcMYB38 | AtMYB42  | 31.44 | 194 | 130 | 6  | 370 | 942  | 6  | 184 | 2.00E-22 | 89.7 |
| TcMYB38 | ATMYB3   | 28.37 | 215 | 147 | 5  | 394 | 1017 | 22 | 226 | 2.00E-22 | 88.2 |
| TcMYB38 | ATMYB88  | 33.57 | 140 | 91  | 1  | 316 | 729  | 2  | 141 | 3.00E-22 | 91.3 |
| TcMYB38 | AtMYB85  | 37.25 | 153 | 94  | 5  | 394 | 846  | 14 | 158 | 4.00E-22 | 88.2 |
| TcMYB38 | ATMYB30  | 42.16 | 102 | 58  | 1  | 394 | 696  | 14 | 115 | 6.00E-22 | 89   |
| TcMYB38 | ATMYB57  | 40.74 | 108 | 62  | 2  | 394 | 711  | 27 | 133 | 9.00E-22 | 85.9 |
| TcMYB38 | ATMYB31  | 42.16 | 102 | 58  | 1  | 394 | 696  | 14 | 115 | 1.00E-21 | 88.2 |
| TcMYB38 | AtMYB24  | 41.05 | 95  | 55  | 1  | 394 | 675  | 19 | 113 | 4.00E-21 | 84.3 |
| TcMYB38 | AtMYB124 | 37.86 | 103 | 64  | 0  | 403 | 711  | 28 | 130 | 4.00E-21 | 87.8 |
| TcMYB38 | ATMYB111 | 40.2  | 102 | 60  | 1  | 394 | 696  | 14 | 115 | 4.00E-21 | 86.7 |
| TcMYB38 | ATMYB91  | 34.15 | 123 | 78  | 1  | 394 | 753  | 4  | 126 | 5.00E-21 | 86.7 |
| TcMYB38 | ATMYB12  | 39.22 | 102 | 61  | 1  | 394 | 696  | 14 | 115 | 2.00E-20 | 84.7 |
| TcMYB38 | ATMYB11  | 39.22 | 102 | 61  | 1  | 394 | 696  | 14 | 115 | 3.00E-20 | 84.3 |
| TcMYB38 | ATMYB99  | 36.76 | 136 | 77  | 4  | 394 | 774  | 15 | 144 | 6.00E-19 | 78.6 |
| TcMYB38 | ATMYB78  | 31.43 | 140 | 81  | 2  | 394 | 768  | 28 | 167 | 7.00E-19 | 79.7 |
| TcMYB39 | ATMYB31  | 47.56 | 328 | 157 | 8  | 1   | 939  | 1  | 308 | 8.00E-97 | 283  |
| TcMYB39 | ATMYB94  | 45.24 | 347 | 162 | 7  | 1   | 957  | 1  | 320 | 1.00E-96 | 283  |
| TcMYB39 | ATMYB96  | 46.11 | 360 | 153 | 10 | 1   | 957  | 1  | 341 | 6.00E-94 | 276  |
| TcMYB39 | ATMYB30  | 47.34 | 338 | 154 | 8  | 1   | 942  | 1  | 307 | 8.00E-93 | 273  |
| TcMYB39 | AtMYB60  | 44.51 | 319 | 173 | 5  | 1   | 945  | 1  | 261 | 3.00E-87 | 257  |
| TcMYB39 | ATMYB16  | 45.98 | 224 | 105 | 6  | 1   | 624  | 1  | 223 | 1.00E-63 | 198  |
| TcMYB39 | ATMYB106 | 41.95 | 267 | 155 | 5  | 10  | 810  | 47 | 300 | 7.00E-61 | 192  |
| TcMYB39 | AtMYB17  | 38.14 | 291 | 151 | 5  | 1   | 786  | 1  | 287 | 2.00E-60 | 189  |
| TcMYB39 | ATMYB14  | 66.1  | 118 | 40  | 0  | 1   | 354  | 1  | 118 | 1.00E-59 | 185  |
| TcMYB39 | AtMYB107 | 64.66 | 116 | 41  | 0  | 1   | 348  | 1  | 116 | 2.00E-58 | 184  |
| TcMYB39 | ATMYB13  | 44.13 | 213 | 114 | 1  | 1   | 624  | 1  | 213 | 4.00E-58 | 181  |
| TcMYB39 | AtMYB41  | 67.24 | 116 | 38  | 0  | 1   | 348  | 1  | 116 | 4.00E-58 | 182  |
| TcMYB39 | AtMYB9   | 33.24 | 343 | 203 | 5  | 1   | 951  | 1  | 330 | 7.00E-58 | 183  |
| TcMYB39 | AtMYB32  | 38.02 | 263 | 155 | 3  | 1   | 765  | 1  | 262 | 5.00E-57 | 179  |
| TcMYB39 | AtMYB74  | 45.73 | 199 | 105 | 3  | 1   | 588  | 1  | 192 | 5.00E-57 | 181  |
| TcMYB39 | ATMYB15  | 61.24 | 129 | 48  | 1  | 1   | 381  | 1  | 129 | 1.00E-56 | 179  |
| TcMYB39 | ATMYB72  | 48.84 | 172 | 88  | 2  | 4   | 519  | 4  | 168 | 2.00E-55 | 176  |
| TcMYB39 | ATMYB12  | 40.87 | 208 | 111 | 3  | 1   | 588  | 1  | 208 | 2.00E-55 | 178  |
| TcMYB39 | AtMYB93  | 63.79 | 116 | 42  | 0  | 1   | 348  | 1  | 116 | 2.00E-55 | 177  |
| TcMYB39 | ATMYB102 | 62.18 | 119 | 45  | 0  | 1   | 357  | 1  | 119 | 9.00E-55 | 176  |
| TcMYB39 | AtMYB49  | 36.69 | 278 | 168 | 3  | 1   | 810  | 1  | 277 | 1.00E-54 | 174  |
| TcMYB39 | ATMYB3   | 62.07 | 116 | 44  | 0  | 1   | 348  | 1  | 116 | 4.00E-54 | 171  |
| TcMYB39 | ATMYB34  | 63.56 | 118 | 43  | 0  | 1   | 354  | 1  | 118 | 9.00E-54 | 171  |
| TcMYB39 | AtMYB43  | 40.08 | 247 | 135 | 5  | 1   | 702  | 1  | 237 | 1.00E-53 | 172  |
| TcMYB39 | MYB8     | 62.07 | 116 | 44  | 0  | 1   | 348  | 1  | 116 | 1.00E-53 | 168  |
| TcMYB39 | AtMYB6   | 62.93 | 116 | 43  | 0  | 1   | 348  | 1  | 116 | 1.00E-53 | 169  |
| TcMYB39 | MYB7     | 37.64 | 263 | 149 | 9  | 1   | 744  | 1  | 248 | 2.00E-53 | 170  |
| TcMYB39 | ATMYB80  | 62.93 | 116 | 43  | 0  | 1   | 348  | 1  | 116 | 3.00E-53 | 171  |
| TcMYB39 | ATMYB28  | 37.46 | 283 | 176 | 6  | 1   | 846  | 1  | 256 | 3.00E-53 | 172  |
| TcMYB39 | ATMYB92  | 62.07 | 116 | 44  | 0  | 1   | 348  | 1  | 116 | 4.00E-53 | 171  |
| TcMYB39 | ATMYB63  | 36.31 | 314 | 196 | 7  | 4   | 933  | 4  | 291 | 5.00E-53 | 169  |
| TcMYB39 | AtMYB20  | 59.66 | 119 | 48  | 0  | 1   | 357  | 1  | 119 | 5.00E-53 | 169  |
| TcMYB39 | ATMYB35  | 32.29 | 319 | 196 | 7  | 1   | 897  | 1  | 281 | 2.00E-52 | 169  |
| TcMYB39 | ATMYB11  | 59.06 | 127 | 51  | 1  | 1   | 378  | 1  | 127 | 2.00E-52 | 169  |
| TcMYB39 | ATMYB87  | 59.69 | 129 | 51  | 1  | 1   | 384  | 1  | 129 | 4.00E-52 | 167  |
| TcMYB39 | ATMYB4   | 61.21 | 116 | 45  | 0  | 1   | 348  | 1  | 116 | 4.00E-52 | 167  |
| TcMYB39 | AtMYB53  | 61.21 | 116 | 45  | 0  | 1   | 348  | 1  | 116 | 6.00E-52 | 167  |
| TcMYB39 | AtMYB51  | 63.87 | 119 | 42  | 1  | 1   | 354  | 1  | 119 | 6.00E-52 | 168  |
| TcMYB39 | AtMYB36  | 52.56 | 156 | 67  | 3  | 1   | 447  | 1  | 156 | 1.00E-51 | 167  |
| TcMYB39 | ATMYB38  | 58.09 | 136 | 56  | 1  | 1   | 405  | 1  | 136 | 2.00E-51 | 165  |
| TcMYB39 | ATMYB111 | 59.48 | 116 | 47  | 0  | 1   | 348  | 1  | 116 | 4.00E-51 | 166  |

|         |           |       |     |     |    |     |     |     |     |          |      |
|---------|-----------|-------|-----|-----|----|-----|-----|-----|-----|----------|------|
| TcMYB39 | ATMYB68   | 50.94 | 159 | 72  | 3  | 1   | 459 | 1   | 156 | 1.00E-50 | 166  |
| TcMYB39 | ATMYB5    | 59.29 | 113 | 46  | 0  | 10  | 348 | 15  | 127 | 1.00E-50 | 162  |
| TcMYB39 | AtMYB85   | 58.82 | 119 | 49  | 0  | 1   | 357 | 1   | 119 | 2.00E-50 | 162  |
| TcMYB39 | AtMYB42   | 58.33 | 120 | 50  | 0  | 1   | 360 | 1   | 120 | 2.00E-50 | 162  |
| TcMYB39 | AtMYB10   | 55.64 | 133 | 59  | 0  | 7   | 405 | 5   | 137 | 2.00E-50 | 161  |
| TcMYB39 | ATMYB37   | 58.46 | 130 | 53  | 1  | 1   | 387 | 1   | 130 | 2.00E-50 | 164  |
| TcMYB39 | ATMYB29   | 61.21 | 116 | 45  | 0  | 1   | 348 | 1   | 116 | 2.00E-50 | 164  |
| TcMYB39 | ATMYB122  | 41.07 | 224 | 107 | 5  | 1   | 597 | 1   | 223 | 4.00E-50 | 163  |
| TcMYB39 | AtMYB76   | 39.69 | 257 | 137 | 5  | 1   | 717 | 1   | 247 | 5.00E-50 | 163  |
| TcMYB39 | ATMYB84   | 62.39 | 117 | 43  | 1  | 1   | 348 | 1   | 117 | 1.00E-49 | 161  |
| TcMYB39 | ATMYB58   | 59.13 | 115 | 47  | 0  | 4   | 348 | 4   | 118 | 1.00E-49 | 160  |
| TcMYB39 | ATMYB95   | 61.86 | 118 | 45  | 0  | 1   | 354 | 1   | 118 | 2.00E-49 | 159  |
| TcMYB39 | ATMYB86   | 34.22 | 301 | 192 | 6  | 1   | 885 | 1   | 276 | 4.00E-49 | 161  |
| TcMYB39 | ATMYB101  | 34.57 | 269 | 162 | 6  | 31  | 795 | 17  | 277 | 6.00E-49 | 164  |
| TcMYB39 | AtMYB40   | 38.37 | 245 | 147 | 5  | 1   | 723 | 1   | 230 | 8.00E-49 | 157  |
| TcMYB39 | AtMYB103  | 58.47 | 118 | 49  | 0  | 1   | 354 | 1   | 118 | 2.00E-48 | 160  |
| TcMYB39 | ATMYB99   | 56    | 125 | 48  | 1  | 4   | 357 | 3   | 127 | 8.00E-48 | 154  |
| TcMYB39 | AtMYB47   | 59.32 | 118 | 48  | 0  | 1   | 354 | 1   | 118 | 1.00E-47 | 155  |
| TcMYB39 | ATMYB71   | 33.9  | 295 | 193 | 10 | 31  | 909 | 17  | 268 | 1.00E-47 | 155  |
| TcMYB39 | AtMYB50   | 36    | 275 | 168 | 7  | 1   | 801 | 1   | 263 | 1.00E-46 | 153  |
| TcMYB39 | ATMYB61   | 57.63 | 118 | 50  | 0  | 1   | 354 | 1   | 118 | 3.00E-46 | 154  |
| TcMYB39 | ATMYB120  | 32.14 | 252 | 171 | 2  | 34  | 789 | 26  | 274 | 3.00E-45 | 154  |
| TcMYB39 | ATMYB67   | 36.09 | 266 | 159 | 7  | 16  | 780 | 16  | 239 | 5.00E-45 | 149  |
| TcMYB39 | ATMYB26   | 52    | 125 | 51  | 1  | 1   | 348 | 1   | 125 | 9.00E-45 | 150  |
| TcMYB39 | ATMYB66   | 57.69 | 104 | 44  | 0  | 37  | 348 | 17  | 120 | 1.00E-44 | 145  |
| TcMYB39 | ATMYB121  | 41.62 | 185 | 108 | 2  | 31  | 585 | 26  | 185 | 3.00E-44 | 146  |
| TcMYB39 | ATMYB23   | 57.69 | 104 | 44  | 0  | 37  | 348 | 13  | 116 | 4.00E-44 | 144  |
| TcMYB39 | AtMYB82   | 47.89 | 142 | 59  | 2  | 34  | 414 | 12  | 149 | 5.00E-44 | 143  |
| TcMYB39 | ATMYB0    | 44.67 | 150 | 82  | 2  | 37  | 483 | 15  | 158 | 1.00E-43 | 143  |
| TcMYB39 | ATMYB3    | 53.85 | 117 | 54  | 0  | 4   | 354 | 10  | 126 | 2.00E-43 | 142  |
| TcMYB39 | AtMYB79   | 46.63 | 163 | 82  | 2  | 37  | 510 | 7   | 169 | 2.00E-43 | 143  |
| TcMYB39 | AtMYB81   | 41.75 | 194 | 111 | 6  | 25  | 600 | 17  | 189 | 6.00E-43 | 146  |
| TcMYB39 | AtMYB113  | 40.3  | 201 | 119 | 6  | 1   | 600 | 1   | 181 | 6.00E-43 | 142  |
| TcMYB39 | ATMYB123  | 55.45 | 110 | 49  | 0  | 34  | 363 | 14  | 123 | 8.00E-43 | 142  |
| TcMYB39 | AtMYB114  | 47.69 | 130 | 68  | 1  | 31  | 420 | 7   | 132 | 9.00E-43 | 138  |
| TcMYB39 | ATMYB33   | 56.48 | 108 | 47  | 0  | 22  | 345 | 28  | 135 | 9.00E-43 | 147  |
| TcMYB39 | AtMYB24   | 41.28 | 172 | 92  | 3  | 34  | 522 | 17  | 185 | 1.00E-42 | 140  |
| TcMYB39 | ATMYB65   | 56.73 | 104 | 45  | 0  | 34  | 345 | 41  | 144 | 1.00E-42 | 147  |
| TcMYB39 | ATMYB46   | 39    | 200 | 120 | 3  | 34  | 627 | 18  | 214 | 1.00E-42 | 142  |
| TcMYB39 | AtMYB97   | 57.14 | 105 | 45  | 0  | 28  | 342 | 17  | 121 | 2.00E-42 | 144  |
| TcMYB39 | ATMYB57   | 40.44 | 183 | 102 | 3  | 34  | 561 | 25  | 197 | 3.00E-42 | 139  |
| TcMYB39 | AtMYB83   | 44.44 | 153 | 79  | 1  | 22  | 462 | 26  | 178 | 5.00E-42 | 142  |
| TcMYB39 | ATMYB2    | 53.91 | 115 | 53  | 0  | 34  | 378 | 20  | 134 | 7.00E-42 | 140  |
| TcMYB39 | AtMYB108  | 38.62 | 189 | 114 | 2  | 22  | 582 | 15  | 195 | 2.00E-41 | 140  |
| TcMYB39 | AtMYB116  | 50.42 | 119 | 59  | 0  | 37  | 393 | 19  | 137 | 3.00E-41 | 138  |
| TcMYB39 | ATMYB48   | 50.89 | 112 | 55  | 0  | 31  | 366 | 6   | 117 | 3.00E-41 | 137  |
| TcMYB39 | ATMYB59-3 | 51.82 | 110 | 53  | 0  | 37  | 366 | 9   | 118 | 4.00E-41 | 137  |
| TcMYB39 | AtMYB112  | 43.31 | 157 | 89  | 1  | 25  | 495 | 29  | 177 | 5.00E-41 | 137  |
| TcMYB39 | AtMYB62   | 38.03 | 213 | 127 | 6  | 34  | 657 | 19  | 209 | 7.00E-41 | 137  |
| TcMYB39 | ATMYB55   | 50.39 | 129 | 52  | 1  | 1   | 351 | 1   | 129 | 7.00E-41 | 139  |
| TcMYB39 | ATMYB75   | 54.29 | 105 | 48  | 0  | 31  | 345 | 7   | 111 | 1.00E-39 | 133  |
| TcMYB39 | ATMYB90   | 47.69 | 130 | 68  | 1  | 31  | 420 | 7   | 133 | 2.00E-39 | 133  |
| TcMYB39 | AtMYB45   | 45.04 | 131 | 64  | 1  | 37  | 405 | 19  | 149 | 4.00E-39 | 132  |
| TcMYB39 | AtMYB19   | 41.38 | 174 | 99  | 2  | 37  | 549 | 13  | 180 | 5.00E-39 | 132  |
| TcMYB39 | AtMYB18   | 35.06 | 251 | 160 | 5  | 37  | 780 | 11  | 254 | 4.00E-37 | 127  |
| TcMYB39 | ATMYB78   | 41.36 | 162 | 81  | 2  | 22  | 465 | 22  | 175 | 5.00E-37 | 128  |
| TcMYB39 | AtMYB27   | 50.96 | 104 | 51  | 0  | 34  | 345 | 9   | 112 | 4.00E-33 | 115  |
| TcMYB39 | AtMYB104  | 42.61 | 115 | 66  | 1  | 40  | 384 | 18  | 131 | 6.00E-30 | 110  |
| TcMYB39 | AtMYB70   | 50    | 102 | 51  | 1  | 40  | 345 | 13  | 113 | 8.00E-30 | 108  |
| TcMYB39 | ATMYB73   | 47.06 | 102 | 54  | 1  | 40  | 345 | 13  | 113 | 2.00E-28 | 105  |
| TcMYB39 | AtMYB109  | 47.17 | 106 | 56  | 1  | 40  | 357 | 56  | 160 | 5.00E-28 | 105  |
| TcMYB39 | ATMYB25   | 45.1  | 102 | 56  | 1  | 40  | 345 | 50  | 150 | 6.00E-28 | 104  |
| TcMYB39 | AtMYB1    | 49.02 | 102 | 52  | 1  | 40  | 345 | 55  | 155 | 6.00E-28 | 105  |
| TcMYB39 | ATMYB77   | 46.08 | 102 | 55  | 1  | 40  | 345 | 6   | 106 | 1.00E-26 | 100  |
| TcMYB39 | ATMYB44   | 45.1  | 102 | 56  | 1  | 40  | 345 | 6   | 106 | 6.00E-26 | 98.2 |
| TcMYB39 | ATMYB118  | 43.93 | 107 | 60  | 1  | 25  | 345 | 184 | 289 | 1.00E-25 | 99.4 |
| TcMYB39 | ATMYB118  | 34.48 | 58  | 37  | 1  | 184 | 354 | 184 | 241 | 7.00E-07 | 42.7 |
| TcMYB39 | ATMYB119  | 30.09 | 226 | 156 | 5  | 40  | 711 | 105 | 319 | 1.00E-25 | 99   |
| TcMYB39 | ATMYB105  | 39.13 | 115 | 70  | 1  | 25  | 369 | 102 | 215 | 4.00E-25 | 96.3 |
| TcMYB39 | AtMYB115  | 39.09 | 110 | 67  | 2  | 34  | 363 | 156 | 263 | 9.00E-25 | 95.9 |
| TcMYB39 | AtMYB98   | 40.95 | 105 | 62  | 1  | 40  | 354 | 217 | 320 | 9.00E-25 | 96.7 |
| TcMYB39 | AtMYB117  | 33.56 | 149 | 93  | 2  | 40  | 468 | 98  | 245 | 1.00E-24 | 95.5 |
| TcMYB39 | ATMYB54   | 39.45 | 109 | 66  | 1  | 40  | 366 | 6   | 113 | 1.00E-24 | 93.2 |
| TcMYB39 | ATMYB69   | 39.09 | 110 | 67  | 1  | 25  | 354 | 14  | 122 | 3.00E-24 | 92.4 |
| TcMYB39 | ATMYB52   | 42.16 | 102 | 59  | 1  | 40  | 345 | 5   | 105 | 8.00E-24 | 91.3 |
| TcMYB39 | AtMYB56   | 39.5  | 119 | 72  | 2  | 4   | 360 | 82  | 198 | 1.00E-23 | 92.4 |
| TcMYB39 | AtMYB64   | 38.1  | 105 | 65  | 1  | 40  | 354 | 105 | 208 | 3.00E-23 | 92.4 |
| TcMYB39 | ATMYB91   | 38.46 | 104 | 62  | 1  | 49  | 354 | 7   | 110 | 6.00E-23 | 90.9 |
| TcMYB39 | AtMYB124  | 39.6  | 101 | 61  | 1  | 49  | 351 | 28  | 127 | 3.00E-21 | 86.7 |
| TcMYB39 | ATMYB110  | 34.96 | 123 | 80  | 2  | 40  | 408 | 67  | 184 | 3.00E-21 | 85.1 |

|         |          |       |     |     |   |    |     |    |     |          |      |
|---------|----------|-------|-----|-----|---|----|-----|----|-----|----------|------|
| TcMYB39 | ATMYB88  | 39.6  | 101 | 61  | 1 | 49 | 351 | 33 | 132 | 6.00E-21 | 85.9 |
| TcMYB39 | AtMYB89  | 36.54 | 104 | 66  | 1 | 43 | 354 | 57 | 159 | 1.00E-20 | 81.3 |
| TcMYB39 | AtMYB100 | 39.45 | 109 | 66  | 2 | 25 | 351 | 21 | 127 | 5.00E-20 | 80.5 |
| TcMYB39 | AtMYB22  | 23.36 | 214 | 152 | 6 | 25 | 630 | 49 | 255 | 3.00E-19 | 78.6 |
| TcMYB40 | ATMYB15  | 50.8  | 250 | 107 | 7 | 1  | 702 | 1  | 234 | 5.00E-76 | 228  |
| TcMYB40 | AtMYB17  | 44.17 | 283 | 130 | 7 | 1  | 765 | 1  | 283 | 1.00E-75 | 227  |
| TcMYB40 | AtMYB9   | 39.32 | 351 | 171 | 9 | 1  | 927 | 1  | 331 | 1.00E-74 | 226  |
| TcMYB40 | AtMYB107 | 76.98 | 126 | 29  | 0 | 1  | 378 | 1  | 126 | 7.00E-74 | 223  |
| TcMYB40 | ATMYB14  | 82.76 | 116 | 20  | 0 | 1  | 348 | 1  | 116 | 9.00E-73 | 218  |
| TcMYB40 | ATMYB102 | 43.04 | 309 | 162 | 8 | 1  | 885 | 1  | 280 | 1.00E-72 | 221  |
| TcMYB40 | AtMYB85  | 50.23 | 221 | 91  | 3 | 1  | 606 | 1  | 221 | 9.00E-72 | 216  |
| TcMYB40 | ATMYB16  | 74.6  | 126 | 32  | 0 | 1  | 378 | 1  | 126 | 5.00E-71 | 216  |
| TcMYB40 | AtMYB41  | 74.8  | 127 | 32  | 0 | 1  | 381 | 1  | 127 | 8.00E-71 | 214  |
| TcMYB40 | AtMYB74  | 43.05 | 295 | 155 | 7 | 1  | 846 | 1  | 283 | 1.00E-70 | 215  |
| TcMYB40 | AtMYB93  | 74.6  | 126 | 32  | 0 | 1  | 378 | 1  | 126 | 2.00E-70 | 216  |
| TcMYB40 | ATMYB13  | 47.2  | 250 | 130 | 6 | 1  | 744 | 1  | 227 | 1.00E-69 | 210  |
| TcMYB40 | ATMYB58  | 45.28 | 254 | 132 | 5 | 4  | 744 | 4  | 232 | 6.00E-69 | 209  |
| TcMYB40 | ATMYB92  | 50    | 212 | 106 | 2 | 1  | 636 | 1  | 208 | 2.00E-68 | 210  |
| TcMYB40 | ATMYB5   | 72.13 | 122 | 34  | 0 | 13 | 378 | 16 | 137 | 3.00E-68 | 206  |
| TcMYB40 | ATMYB106 | 73.98 | 123 | 32  | 0 | 10 | 378 | 47 | 169 | 8.00E-68 | 210  |
| TcMYB40 | AtMYB53  | 73.02 | 126 | 34  | 0 | 1  | 378 | 1  | 126 | 1.00E-67 | 207  |
| TcMYB40 | AtMYB42  | 54.97 | 191 | 78  | 2 | 1  | 549 | 1  | 180 | 1.00E-67 | 206  |
| TcMYB40 | AtMYB43  | 74.6  | 126 | 32  | 0 | 1  | 378 | 1  | 126 | 4.00E-67 | 206  |
| TcMYB40 | AtMYB20  | 73.02 | 126 | 34  | 0 | 1  | 378 | 1  | 126 | 1.00E-66 | 203  |
| TcMYB40 | ATMYB3   | 58.23 | 158 | 66  | 0 | 1  | 474 | 1  | 158 | 4.00E-66 | 201  |
| TcMYB40 | MYB7     | 53.85 | 169 | 77  | 1 | 1  | 504 | 1  | 169 | 5.00E-66 | 201  |
| TcMYB40 | ATMYB72  | 69.12 | 136 | 39  | 1 | 4  | 402 | 4  | 139 | 2.00E-65 | 201  |
| TcMYB40 | AtMYB6   | 68.25 | 126 | 40  | 0 | 1  | 378 | 1  | 126 | 2.00E-65 | 199  |
| TcMYB40 | MYB8     | 66.67 | 126 | 42  | 0 | 1  | 378 | 1  | 126 | 3.00E-65 | 197  |
| TcMYB40 | AtMYB32  | 63.01 | 146 | 54  | 0 | 1  | 438 | 1  | 146 | 3.00E-65 | 199  |
| TcMYB40 | AtMYB10  | 65.94 | 138 | 42  | 1 | 7  | 405 | 5  | 142 | 1.00E-64 | 197  |
| TcMYB40 | ATMYB4   | 66.67 | 126 | 42  | 0 | 1  | 378 | 1  | 126 | 5.00E-64 | 197  |
| TcMYB40 | ATMYB63  | 76.52 | 115 | 27  | 0 | 4  | 348 | 4  | 118 | 2.00E-63 | 196  |
| TcMYB40 | AtMYB49  | 51.46 | 206 | 92  | 5 | 1  | 594 | 1  | 201 | 2.00E-63 | 196  |
| TcMYB40 | AtMYB40  | 64.93 | 134 | 47  | 0 | 1  | 402 | 1  | 134 | 3.00E-62 | 191  |
| TcMYB40 | ATMYB122 | 47.27 | 220 | 97  | 3 | 1  | 603 | 1  | 218 | 4.00E-62 | 193  |
| TcMYB40 | ATMYB28  | 48.11 | 212 | 110 | 3 | 1  | 636 | 1  | 199 | 5.00E-62 | 194  |
| TcMYB40 | AtMYB51  | 66.93 | 127 | 41  | 1 | 1  | 378 | 1  | 127 | 1.00E-61 | 192  |
| TcMYB40 | ATMYB12  | 43.72 | 247 | 132 | 7 | 1  | 720 | 1  | 231 | 3.00E-61 | 192  |
| TcMYB40 | ATMYB34  | 66.67 | 126 | 42  | 0 | 1  | 378 | 1  | 126 | 5.00E-61 | 189  |
| TcMYB40 | ATMYB111 | 70.69 | 116 | 34  | 0 | 1  | 348 | 1  | 116 | 6.00E-61 | 191  |
| TcMYB40 | ATMYB35  | 56.33 | 158 | 68  | 3 | 1  | 471 | 1  | 151 | 2.00E-60 | 189  |
| TcMYB40 | ATMYB80  | 61.15 | 139 | 54  | 1 | 1  | 417 | 1  | 136 | 2.00E-60 | 189  |
| TcMYB40 | ATMYB29  | 37.13 | 334 | 171 | 9 | 1  | 885 | 1  | 334 | 2.00E-60 | 189  |
| TcMYB40 | AtMYB60  | 67.21 | 122 | 40  | 0 | 1  | 366 | 1  | 122 | 4.00E-60 | 187  |
| TcMYB40 | ATMYB11  | 69.83 | 116 | 35  | 0 | 1  | 348 | 1  | 116 | 7.00E-60 | 188  |
| TcMYB40 | ATMYB99  | 62.88 | 132 | 42  | 1 | 4  | 378 | 3  | 134 | 1.00E-59 | 184  |
| TcMYB40 | ATMYB61  | 66.67 | 126 | 42  | 0 | 1  | 378 | 1  | 126 | 4.00E-59 | 187  |
| TcMYB40 | ATMYB94  | 67.23 | 119 | 39  | 0 | 1  | 357 | 1  | 119 | 2.00E-58 | 184  |
| TcMYB40 | ATMYB30  | 67.21 | 122 | 40  | 0 | 1  | 366 | 1  | 122 | 3.00E-58 | 183  |
| TcMYB40 | AtMYB76  | 48.99 | 198 | 101 | 3 | 1  | 594 | 1  | 188 | 3.00E-58 | 184  |
| TcMYB40 | ATMYB86  | 66.67 | 126 | 42  | 0 | 1  | 378 | 1  | 126 | 3.00E-58 | 184  |
| TcMYB40 | ATMYB31  | 67.23 | 119 | 39  | 0 | 1  | 357 | 1  | 119 | 9.00E-58 | 182  |
| TcMYB40 | ATMYB96  | 65.55 | 119 | 41  | 0 | 1  | 357 | 1  | 119 | 3.00E-57 | 181  |
| TcMYB40 | AtMYB50  | 62.7  | 126 | 47  | 0 | 1  | 378 | 1  | 126 | 4.00E-57 | 180  |
| TcMYB40 | ATMYB95  | 50.89 | 169 | 83  | 0 | 1  | 507 | 1  | 169 | 7.00E-57 | 178  |
| TcMYB40 | AtMYB47  | 37.69 | 268 | 162 | 5 | 1  | 789 | 1  | 246 | 1.00E-54 | 172  |
| TcMYB40 | ATMYB67  | 48.77 | 162 | 83  | 1 | 16 | 501 | 16 | 176 | 2.00E-54 | 172  |
| TcMYB40 | ATMYB55  | 59.42 | 138 | 44  | 1 | 1  | 378 | 1  | 138 | 7.00E-54 | 172  |
| TcMYB40 | ATMYB37  | 42.92 | 212 | 120 | 2 | 1  | 633 | 1  | 211 | 3.00E-53 | 170  |
| TcMYB40 | ATMYB87  | 61.86 | 118 | 44  | 1 | 1  | 351 | 1  | 118 | 2.00E-52 | 167  |
| TcMYB40 | ATMYB84  | 63.56 | 118 | 42  | 1 | 1  | 351 | 1  | 118 | 1.00E-51 | 166  |
| TcMYB40 | ATMYB38  | 53.64 | 151 | 61  | 2 | 1  | 426 | 1  | 151 | 3.00E-51 | 164  |
| TcMYB40 | ATMYB68  | 64.41 | 118 | 41  | 1 | 1  | 351 | 1  | 118 | 3.00E-51 | 166  |
| TcMYB40 | AtMYB103 | 62.07 | 116 | 44  | 0 | 1  | 348 | 1  | 116 | 2.00E-50 | 164  |
| TcMYB40 | AtMYB36  | 63.56 | 118 | 42  | 1 | 1  | 351 | 1  | 118 | 2.00E-50 | 163  |
| TcMYB40 | ATMYB23  | 53.24 | 139 | 62  | 1 | 37 | 444 | 13 | 151 | 7.00E-50 | 158  |
| TcMYB40 | ATMYB123 | 70.48 | 105 | 31  | 0 | 34 | 348 | 14 | 118 | 7.00E-50 | 159  |
| TcMYB40 | ATMYB26  | 57.94 | 126 | 44  | 1 | 1  | 351 | 1  | 126 | 2.00E-49 | 162  |
| TcMYB40 | ATMYB101 | 46.2  | 184 | 99  | 4 | 31 | 582 | 17 | 190 | 2.00E-49 | 164  |
| TcMYB40 | ATMYB66  | 62.5  | 104 | 39  | 0 | 37 | 348 | 17 | 120 | 1.00E-48 | 154  |
| TcMYB40 | AtMYB83  | 64.22 | 109 | 39  | 0 | 22 | 348 | 26 | 134 | 4.00E-48 | 157  |
| TcMYB40 | ATMYB46  | 42.51 | 207 | 117 | 4 | 34 | 648 | 18 | 203 | 6.00E-48 | 155  |
| TcMYB40 | AtMYB82  | 61.68 | 107 | 41  | 0 | 25 | 345 | 9  | 115 | 2.00E-47 | 151  |
| TcMYB40 | AtMYB24  | 57.38 | 122 | 52  | 1 | 34 | 399 | 17 | 135 | 8.00E-47 | 150  |
| TcMYB40 | ATMYB120 | 61.82 | 110 | 42  | 1 | 34 | 363 | 26 | 134 | 3.00E-46 | 156  |
| TcMYB40 | ATMYB0   | 59.05 | 105 | 43  | 0 | 37 | 351 | 15 | 119 | 5.00E-46 | 149  |
| TcMYB40 | ATMYB3   | 50.32 | 155 | 76  | 3 | 34 | 495 | 20 | 169 | 6.00E-46 | 148  |
| TcMYB40 | AtMYB114 | 60    | 105 | 42  | 0 | 31 | 345 | 7  | 111 | 1.00E-45 | 145  |
| TcMYB40 | ATMYB71  | 60.95 | 105 | 41  | 0 | 31 | 345 | 17 | 121 | 1.00E-45 | 149  |

|         |           |       |     |     |   |     |     |     |     |          |      |
|---------|-----------|-------|-----|-----|---|-----|-----|-----|-----|----------|------|
| TcMYB40 | AtMYB79   | 62.14 | 103 | 39  | 0 | 37  | 345 | 7   | 109 | 2.00E-45 | 148  |
| TcMYB40 | ATMYB33   | 59.26 | 108 | 44  | 0 | 22  | 345 | 28  | 135 | 4.00E-45 | 153  |
| TcMYB40 | AtMYB81   | 52.67 | 131 | 58  | 2 | 25  | 405 | 17  | 146 | 5.00E-45 | 151  |
| TcMYB40 | AtMYB116  | 55.26 | 114 | 51  | 0 | 37  | 378 | 19  | 132 | 2.00E-44 | 146  |
| TcMYB40 | AtMYB62   | 35.48 | 279 | 177 | 8 | 34  | 861 | 19  | 279 | 2.00E-44 | 146  |
| TcMYB40 | AtMYB108  | 58.26 | 115 | 48  | 0 | 22  | 366 | 15  | 129 | 6.00E-44 | 146  |
| TcMYB40 | ATMYB75   | 59.05 | 105 | 43  | 0 | 31  | 345 | 7   | 111 | 7.00E-44 | 144  |
| TcMYB40 | ATMYB121  | 59.43 | 106 | 43  | 0 | 25  | 342 | 24  | 129 | 1.00E-43 | 144  |
| TcMYB40 | ATMYB65   | 59.62 | 104 | 42  | 0 | 34  | 345 | 41  | 144 | 1.00E-43 | 150  |
| TcMYB40 | AtMYB19   | 44.75 | 181 | 97  | 1 | 25  | 558 | 9   | 189 | 2.00E-43 | 143  |
| TcMYB40 | AtMYB97   | 57.27 | 110 | 47  | 1 | 34  | 363 | 19  | 127 | 2.00E-43 | 146  |
| TcMYB40 | ATMYB90   | 59.05 | 105 | 43  | 0 | 31  | 345 | 7   | 111 | 2.00E-43 | 142  |
| TcMYB40 | ATMYB2    | 37.62 | 202 | 115 | 3 | 34  | 606 | 20  | 220 | 3.00E-43 | 143  |
| TcMYB40 | ATMYB57   | 58.1  | 105 | 44  | 0 | 34  | 348 | 25  | 129 | 1.00E-42 | 139  |
| TcMYB40 | AtMYB113  | 54.78 | 115 | 52  | 1 | 1   | 345 | 1   | 111 | 2.00E-42 | 140  |
| TcMYB40 | AtMYB112  | 55.75 | 113 | 48  | 1 | 34  | 366 | 32  | 144 | 7.00E-42 | 138  |
| TcMYB40 | ATMYB48   | 55.24 | 105 | 47  | 0 | 31  | 345 | 6   | 110 | 1.00E-41 | 138  |
| TcMYB40 | ATMYB59-3 | 55.34 | 103 | 46  | 0 | 37  | 345 | 9   | 111 | 3.00E-41 | 136  |
| TcMYB40 | AtMYB18   | 52.85 | 123 | 58  | 0 | 37  | 405 | 11  | 133 | 2.00E-40 | 135  |
| TcMYB40 | AtMYB27   | 35.46 | 251 | 161 | 6 | 34  | 783 | 9   | 235 | 3.00E-40 | 134  |
| TcMYB40 | AtMYB45   | 54.9  | 102 | 46  | 0 | 37  | 342 | 19  | 120 | 3.00E-38 | 129  |
| TcMYB40 | ATMYB78   | 30.32 | 310 | 198 | 8 | 22  | 897 | 22  | 308 | 1.00E-37 | 129  |
| TcMYB40 | AtMYB104  | 38.78 | 147 | 84  | 3 | 25  | 447 | 13  | 158 | 8.00E-31 | 112  |
| TcMYB40 | ATMYB77   | 39.38 | 160 | 97  | 4 | 40  | 519 | 6   | 160 | 2.00E-29 | 107  |
| TcMYB40 | ATMYB73   | 48.04 | 102 | 53  | 1 | 40  | 345 | 13  | 113 | 6.00E-29 | 106  |
| TcMYB40 | AtMYB1    | 47.22 | 108 | 53  | 2 | 40  | 351 | 55  | 157 | 6.00E-29 | 107  |
| TcMYB40 | AtMYB1    | 36.21 | 58  | 36  | 1 | 184 | 354 | 50  | 107 | 3.00E-05 | 37.4 |
| TcMYB40 | AtMYB70   | 47.06 | 102 | 54  | 1 | 40  | 345 | 13  | 113 | 9.00E-29 | 105  |
| TcMYB40 | AtMYB70   | 32.73 | 55  | 36  | 1 | 199 | 360 | 13  | 67  | 4.00E-04 | 33.9 |
| TcMYB40 | AtMYB98   | 45.79 | 107 | 58  | 1 | 25  | 345 | 212 | 317 | 4.00E-28 | 105  |
| TcMYB40 | AtMYB115  | 44.66 | 103 | 57  | 2 | 40  | 348 | 158 | 258 | 7.00E-28 | 103  |
| TcMYB40 | ATMYB44   | 33.16 | 193 | 94  | 4 | 40  | 513 | 6   | 197 | 1.00E-27 | 102  |
| TcMYB40 | ATMYB25   | 48.54 | 103 | 52  | 2 | 40  | 345 | 50  | 150 | 2.00E-27 | 103  |
| TcMYB40 | ATMYB25   | 32.08 | 53  | 35  | 1 | 199 | 354 | 50  | 102 | 9.00E-04 | 32.7 |
| TcMYB40 | AtMYB109  | 47.57 | 103 | 53  | 2 | 40  | 345 | 56  | 156 | 4.00E-27 | 102  |
| TcMYB40 | ATMYB118  | 41.13 | 124 | 71  | 2 | 25  | 390 | 184 | 306 | 4.00E-27 | 102  |
| TcMYB40 | ATMYB119  | 43.27 | 104 | 59  | 1 | 34  | 345 | 103 | 205 | 8.00E-27 | 102  |
| TcMYB40 | ATMYB119  | 29.09 | 55  | 38  | 1 | 199 | 360 | 105 | 159 | 1.00E-04 | 35.8 |
| TcMYB40 | ATMYB52   | 45.28 | 106 | 58  | 1 | 28  | 345 | 1   | 105 | 6.00E-26 | 96.7 |
| TcMYB40 | ATMYB52   | 32.08 | 53  | 35  | 1 | 199 | 354 | 5   | 57  | 5.00E-04 | 33.1 |
| TcMYB40 | ATMYB54   | 47.57 | 103 | 53  | 2 | 40  | 345 | 6   | 106 | 7.00E-26 | 96.3 |
| TcMYB40 | ATMYB54   | 33.96 | 53  | 34  | 1 | 199 | 354 | 6   | 58  | 9.00E-05 | 35.4 |
| TcMYB40 | AtMYB64   | 41.18 | 102 | 60  | 1 | 40  | 345 | 105 | 205 | 4.00E-25 | 97.1 |
| TcMYB40 | ATMYB69   | 38.46 | 143 | 81  | 3 | 25  | 432 | 14  | 154 | 4.00E-24 | 91.7 |
| TcMYB40 | ATMYB105  | 34.78 | 161 | 88  | 3 | 25  | 456 | 102 | 261 | 2.00E-23 | 91.3 |
| TcMYB40 | AtMYB117  | 43.27 | 104 | 59  | 1 | 34  | 345 | 96  | 198 | 9.00E-23 | 89.7 |
| TcMYB40 | AtMYB100  | 31    | 200 | 133 | 7 | 25  | 609 | 21  | 205 | 3.00E-22 | 86.3 |
| TcMYB40 | ATMYB110  | 40.78 | 103 | 61  | 1 | 40  | 348 | 67  | 168 | 2.00E-21 | 85.1 |
| TcMYB40 | AtMYB56   | 41.18 | 102 | 60  | 1 | 40  | 345 | 93  | 193 | 4.00E-21 | 84.7 |
| TcMYB40 | ATMYB88   | 42.42 | 99  | 57  | 1 | 49  | 345 | 33  | 130 | 3.00E-20 | 83.2 |
| TcMYB40 | ATMYB91   | 35.24 | 105 | 66  | 1 | 37  | 345 | 3   | 107 | 2.00E-19 | 80.1 |
| TcMYB40 | AtMYB124  | 41.41 | 99  | 58  | 1 | 49  | 345 | 28  | 125 | 2.00E-19 | 80.5 |
| TcMYB40 | AtMYB89   | 40.38 | 104 | 62  | 2 | 43  | 354 | 57  | 158 | 3.00E-19 | 77   |
| TcMYB40 | AtMYB22   | 35.29 | 102 | 66  | 2 | 25  | 330 | 49  | 148 | 4.00E-17 | 72.4 |
| TcMYB41 | ATMYB59-3 | 59.68 | 62  | 24  | 1 | 25  | 207 | 53  | 114 | 7.00E-23 | 84.7 |
| TcMYB41 | ATMYB48   | 59.68 | 62  | 24  | 1 | 25  | 207 | 52  | 113 | 1.00E-22 | 84.7 |
| TcMYB41 | AtMYB108  | 52.56 | 78  | 37  | 0 | 40  | 273 | 70  | 147 | 2.00E-22 | 85.1 |
| TcMYB41 | AtMYB62   | 43.43 | 99  | 53  | 2 | 34  | 321 | 68  | 166 | 9.00E-22 | 82.8 |
| TcMYB41 | ATMYB2    | 56.34 | 71  | 31  | 1 | 40  | 252 | 71  | 137 | 3.00E-21 | 81.3 |
| TcMYB41 | AtMYB116  | 38.24 | 102 | 63  | 0 | 34  | 339 | 67  | 168 | 4.00E-21 | 80.9 |
| TcMYB41 | AtMYB27   | 56.67 | 60  | 26  | 0 | 40  | 219 | 60  | 119 | 8.00E-21 | 79.3 |
| TcMYB41 | AtMYB79   | 52    | 75  | 35  | 1 | 25  | 246 | 51  | 125 | 8.00E-21 | 79.7 |
| TcMYB41 | ATMYB3    | 57.89 | 57  | 24  | 0 | 40  | 210 | 71  | 127 | 9.00E-21 | 79   |
| TcMYB41 | ATMYB71   | 47.78 | 90  | 44  | 2 | 25  | 285 | 63  | 152 | 9.00E-21 | 79.7 |
| TcMYB41 | AtMYB24   | 57.63 | 59  | 25  | 0 | 40  | 216 | 68  | 126 | 1.00E-20 | 78.6 |
| TcMYB41 | AtMYB112  | 46.15 | 78  | 42  | 0 | 40  | 273 | 83  | 160 | 2.00E-20 | 78.6 |
| TcMYB41 | ATMYB3    | 66.67 | 54  | 18  | 0 | 40  | 201 | 63  | 116 | 4.00E-20 | 77.8 |
| TcMYB41 | MYB7      | 60    | 60  | 23  | 1 | 25  | 201 | 57  | 116 | 5.00E-20 | 77.8 |
| TcMYB41 | ATMYB57   | 55.93 | 59  | 26  | 0 | 40  | 216 | 76  | 134 | 5.00E-20 | 76.6 |
| TcMYB41 | ATMYB121  | 54.41 | 68  | 30  | 1 | 25  | 225 | 72  | 139 | 5.00E-20 | 77.8 |
| TcMYB41 | AtMYB32   | 61.67 | 60  | 22  | 1 | 25  | 201 | 57  | 116 | 7.00E-20 | 77.4 |
| TcMYB41 | ATMYB4    | 60    | 60  | 23  | 1 | 25  | 201 | 57  | 116 | 8.00E-20 | 77.4 |
| TcMYB41 | MYB8      | 60    | 60  | 23  | 1 | 25  | 201 | 57  | 116 | 1.00E-19 | 75.9 |
| TcMYB41 | AtMYB6    | 58.33 | 60  | 24  | 1 | 25  | 201 | 57  | 116 | 2.00E-19 | 75.9 |
| TcMYB41 | ATMYB63   | 53.12 | 64  | 29  | 1 | 25  | 213 | 59  | 122 | 2.00E-19 | 76.6 |
| TcMYB41 | AtMYB10   | 53.12 | 64  | 29  | 1 | 25  | 213 | 59  | 122 | 4.00E-19 | 74.7 |
| TcMYB41 | ATMYB66   | 50.75 | 67  | 29  | 1 | 34  | 222 | 65  | 131 | 9.00E-19 | 73.2 |
| TcMYB41 | ATMYB33   | 64.15 | 53  | 19  | 0 | 40  | 198 | 83  | 135 | 1.00E-18 | 75.5 |
| TcMYB41 | ATMYB78   | 43.48 | 92  | 38  | 1 | 40  | 273 | 77  | 168 | 2.00E-18 | 74.3 |
| TcMYB41 | AtMYB97   | 63.46 | 52  | 19  | 0 | 40  | 195 | 70  | 121 | 2.00E-18 | 74.7 |

|         |          |       |     |    |   |    |     |     |     |          |      |
|---------|----------|-------|-----|----|---|----|-----|-----|-----|----------|------|
| TcMYB41 | AtMYB85  | 55.36 | 56  | 25 | 0 | 40 | 207 | 63  | 118 | 2.00E-18 | 73.6 |
| TcMYB41 | ATMYB86  | 54.84 | 62  | 27 | 1 | 25 | 207 | 57  | 118 | 3.00E-18 | 73.9 |
| TcMYB41 | ATMYB120 | 57.14 | 56  | 24 | 0 | 40 | 207 | 77  | 132 | 3.00E-18 | 74.3 |
| TcMYB41 | ATMYB12  | 67.31 | 52  | 17 | 0 | 46 | 201 | 65  | 116 | 4.00E-18 | 73.6 |
| TcMYB41 | AtMYB9   | 40.54 | 111 | 64 | 3 | 40 | 366 | 63  | 167 | 4.00E-18 | 73.2 |
| TcMYB41 | ATMYB111 | 67.31 | 52  | 17 | 0 | 46 | 201 | 65  | 116 | 5.00E-18 | 73.2 |
| TcMYB41 | AtMYB83  | 52.24 | 67  | 31 | 1 | 25 | 222 | 75  | 141 | 5.00E-18 | 73.2 |
| TcMYB41 | ATMYB99  | 59.26 | 54  | 22 | 0 | 40 | 201 | 71  | 124 | 5.00E-18 | 72   |
| TcMYB41 | ATMYB14  | 53.23 | 62  | 28 | 1 | 25 | 207 | 57  | 118 | 5.00E-18 | 72   |
| TcMYB41 | ATMYB61  | 56.45 | 62  | 26 | 1 | 25 | 207 | 57  | 118 | 5.00E-18 | 73.2 |
| TcMYB41 | ATMYB30  | 55.93 | 59  | 26 | 0 | 40 | 216 | 63  | 121 | 6.00E-18 | 72.8 |
| TcMYB41 | ATMYB96  | 57.63 | 59  | 25 | 0 | 40 | 216 | 63  | 121 | 7.00E-18 | 72.8 |
| TcMYB41 | ATMYB58  | 47.76 | 67  | 34 | 1 | 25 | 222 | 59  | 125 | 7.00E-18 | 72   |
| TcMYB41 | ATMYB65  | 58.49 | 53  | 22 | 0 | 40 | 198 | 92  | 144 | 7.00E-18 | 73.2 |
| TcMYB41 | AtMYB50  | 56.45 | 62  | 26 | 1 | 25 | 207 | 57  | 118 | 7.00E-18 | 72.4 |
| TcMYB41 | ATMYB46  | 50.77 | 65  | 31 | 1 | 25 | 216 | 63  | 127 | 7.00E-18 | 72   |
| TcMYB41 | ATMYB15  | 56.14 | 57  | 25 | 0 | 34 | 204 | 61  | 117 | 8.00E-18 | 72   |
| TcMYB41 | AtMYB60  | 36.63 | 101 | 64 | 0 | 40 | 342 | 63  | 163 | 1.00E-17 | 71.6 |
| TcMYB41 | ATMYB101 | 56.6  | 53  | 23 | 0 | 40 | 198 | 69  | 121 | 1.00E-17 | 72.4 |
| TcMYB41 | AtMYB20  | 55.36 | 56  | 25 | 0 | 40 | 207 | 63  | 118 | 1.00E-17 | 71.2 |
| TcMYB41 | AtMYB107 | 59.26 | 54  | 22 | 0 | 40 | 201 | 63  | 116 | 1.00E-17 | 71.6 |
| TcMYB41 | ATMYB94  | 54.24 | 59  | 27 | 0 | 40 | 216 | 63  | 121 | 2.00E-17 | 71.6 |
| TcMYB41 | ATMYB23  | 40.4  | 99  | 51 | 2 | 34 | 306 | 61  | 156 | 2.00E-17 | 70.1 |
| TcMYB41 | ATMYB13  | 49.25 | 67  | 33 | 1 | 25 | 222 | 57  | 123 | 2.00E-17 | 70.5 |
| TcMYB41 | AtMYB42  | 57.14 | 56  | 24 | 0 | 40 | 207 | 63  | 118 | 2.00E-17 | 70.9 |
| TcMYB41 | AtMYB19  | 53.97 | 63  | 28 | 1 | 25 | 210 | 57  | 119 | 2.00E-17 | 70.5 |
| TcMYB41 | ATMYB80  | 57.41 | 54  | 23 | 0 | 40 | 201 | 63  | 116 | 3.00E-17 | 70.9 |
| TcMYB41 | ATMYB123 | 55.36 | 56  | 25 | 0 | 40 | 207 | 65  | 120 | 3.00E-17 | 70.1 |
| TcMYB41 | ATMYB5   | 59.26 | 54  | 22 | 0 | 40 | 201 | 74  | 127 | 4.00E-17 | 69.7 |
| TcMYB41 | AtMYB74  | 55.36 | 56  | 25 | 0 | 40 | 207 | 64  | 119 | 4.00E-17 | 70.5 |
| TcMYB41 | ATMYB11  | 63.46 | 52  | 19 | 0 | 46 | 201 | 65  | 116 | 4.00E-17 | 70.5 |
| TcMYB41 | ATMYB55  | 54.1  | 61  | 27 | 1 | 25 | 204 | 69  | 129 | 4.00E-17 | 70.5 |
| TcMYB41 | ATMYB0   | 51.79 | 56  | 27 | 0 | 34 | 201 | 63  | 118 | 5.00E-17 | 68.9 |
| TcMYB41 | AtMYB43  | 50    | 62  | 30 | 1 | 25 | 207 | 57  | 118 | 7.00E-17 | 69.7 |
| TcMYB41 | AtMYB81  | 55.17 | 58  | 25 | 1 | 25 | 195 | 65  | 122 | 7.00E-17 | 70.1 |
| TcMYB41 | ATMYB31  | 57.41 | 54  | 23 | 0 | 40 | 201 | 63  | 116 | 1.00E-16 | 69.3 |
| TcMYB41 | ATMYB102 | 55.56 | 54  | 24 | 0 | 40 | 201 | 63  | 116 | 1.00E-16 | 69.3 |
| TcMYB41 | AtMYB103 | 51.61 | 62  | 29 | 1 | 25 | 207 | 57  | 118 | 1.00E-16 | 69.3 |
| TcMYB41 | AtMYB53  | 31.91 | 141 | 94 | 3 | 40 | 456 | 63  | 197 | 1.00E-16 | 68.9 |
| TcMYB41 | AtMYB40  | 52.46 | 61  | 28 | 1 | 25 | 204 | 57  | 117 | 2.00E-16 | 68.2 |
| TcMYB41 | ATMYB35  | 51.79 | 56  | 27 | 0 | 40 | 207 | 63  | 118 | 2.00E-16 | 68.2 |
| TcMYB41 | AtMYB82  | 54.72 | 53  | 24 | 0 | 40 | 198 | 63  | 115 | 3.00E-16 | 66.6 |
| TcMYB41 | AtMYB41  | 50.88 | 57  | 28 | 0 | 40 | 210 | 63  | 119 | 3.00E-16 | 67.8 |
| TcMYB41 | AtMYB51  | 53.57 | 56  | 26 | 0 | 40 | 207 | 64  | 119 | 3.00E-16 | 68.2 |
| TcMYB41 | ATMYB26  | 50    | 60  | 29 | 1 | 25 | 201 | 66  | 125 | 3.00E-16 | 68.2 |
| TcMYB41 | AtMYB18  | 52.38 | 63  | 29 | 1 | 25 | 210 | 55  | 117 | 4.00E-16 | 67.4 |
| TcMYB41 | ATMYB25  | 54.55 | 55  | 25 | 0 | 34 | 198 | 96  | 150 | 4.00E-16 | 67.8 |
| TcMYB41 | ATMYB92  | 55.56 | 54  | 24 | 0 | 40 | 201 | 63  | 116 | 7.00E-16 | 67   |
| TcMYB41 | ATMYB72  | 44.78 | 67  | 36 | 1 | 25 | 222 | 59  | 125 | 7.00E-16 | 66.6 |
| TcMYB41 | AtMYB17  | 53.7  | 54  | 25 | 0 | 40 | 201 | 63  | 116 | 8.00E-16 | 66.6 |
| TcMYB41 | AtMYB45  | 50    | 60  | 29 | 1 | 25 | 201 | 63  | 122 | 8.00E-16 | 66.2 |
| TcMYB41 | ATMYB87  | 57.41 | 54  | 23 | 0 | 40 | 201 | 64  | 117 | 8.00E-16 | 66.6 |
| TcMYB41 | ATMYB106 | 55.36 | 56  | 25 | 0 | 40 | 207 | 106 | 161 | 8.00E-16 | 67   |
| TcMYB41 | ATMYB28  | 50    | 58  | 29 | 0 | 34 | 207 | 61  | 118 | 1.00E-15 | 66.6 |
| TcMYB41 | AtMYB49  | 45.07 | 71  | 37 | 1 | 40 | 246 | 63  | 133 | 1.00E-15 | 66.2 |
| TcMYB41 | ATMYB16  | 53.57 | 56  | 26 | 0 | 40 | 207 | 63  | 118 | 2.00E-15 | 65.9 |
| TcMYB41 | ATMYB84  | 55.56 | 54  | 24 | 0 | 40 | 201 | 64  | 117 | 2.00E-15 | 65.5 |
| TcMYB41 | AtMYB76  | 50    | 56  | 28 | 0 | 34 | 201 | 61  | 116 | 3.00E-15 | 65.1 |
| TcMYB41 | ATMYB67  | 43.33 | 60  | 33 | 1 | 25 | 201 | 67  | 126 | 4.00E-15 | 64.7 |
| TcMYB41 | AtMYB93  | 55.56 | 54  | 24 | 0 | 40 | 201 | 63  | 116 | 5.00E-15 | 64.7 |
| TcMYB41 | ATMYB68  | 53.7  | 54  | 25 | 0 | 40 | 201 | 64  | 117 | 7.00E-15 | 64.3 |
| TcMYB41 | AtMYB36  | 51.85 | 54  | 26 | 0 | 40 | 201 | 64  | 117 | 8.00E-15 | 63.9 |
| TcMYB41 | ATMYB29  | 53.7  | 54  | 25 | 0 | 34 | 195 | 61  | 114 | 8.00E-15 | 63.9 |
| TcMYB41 | ATMYB37  | 48.28 | 58  | 30 | 0 | 40 | 213 | 64  | 121 | 1.00E-14 | 63.2 |
| TcMYB41 | AtMYB114 | 49.09 | 55  | 28 | 0 | 34 | 198 | 57  | 111 | 2.00E-14 | 60.5 |
| TcMYB41 | AtMYB113 | 34.29 | 105 | 59 | 1 | 34 | 318 | 57  | 161 | 3.00E-14 | 61.6 |
| TcMYB41 | ATMYB34  | 48.21 | 56  | 29 | 0 | 40 | 207 | 63  | 118 | 3.00E-14 | 62   |
| TcMYB41 | AtMYB98  | 36.11 | 72  | 46 | 0 | 40 | 255 | 265 | 336 | 5.00E-14 | 62   |
| TcMYB41 | AtMYB98  | 38.78 | 49  | 29 | 1 | 64 | 207 | 221 | 269 | 1.00E-06 | 40.4 |
| TcMYB41 | ATMYB90  | 49.09 | 55  | 28 | 0 | 34 | 198 | 57  | 111 | 6.00E-14 | 60.8 |
| TcMYB41 | ATMYB38  | 50    | 54  | 27 | 0 | 40 | 201 | 64  | 117 | 6.00E-14 | 61.2 |
| TcMYB41 | ATMYB122 | 33.33 | 90  | 39 | 1 | 1  | 207 | 29  | 118 | 7.00E-14 | 61.2 |
| TcMYB41 | ATMYB75  | 49.09 | 55  | 28 | 0 | 34 | 198 | 57  | 111 | 1.00E-13 | 60.1 |
| TcMYB41 | ATMYB95  | 44.64 | 56  | 31 | 0 | 40 | 207 | 63  | 118 | 3.00E-13 | 59.3 |
| TcMYB41 | AtMYB100 | 36.99 | 73  | 46 | 1 | 40 | 258 | 74  | 145 | 3.00E-13 | 58.9 |
| TcMYB41 | AtMYB100 | 24.56 | 57  | 42 | 1 | 46 | 213 | 24  | 80  | 4.00E-04 | 32.3 |
| TcMYB41 | AtMYB104 | 48.15 | 54  | 28 | 0 | 34 | 195 | 65  | 118 | 3.00E-13 | 59.7 |
| TcMYB41 | ATMYB118 | 38.33 | 60  | 37 | 0 | 40 | 219 | 237 | 296 | 1.00E-12 | 57.8 |
| TcMYB41 | ATMYB105 | 37.5  | 64  | 40 | 0 | 34 | 225 | 153 | 216 | 3.00E-12 | 56.6 |
| TcMYB41 | AtMYB47  | 37.93 | 58  | 36 | 0 | 34 | 207 | 61  | 118 | 3.00E-12 | 56.2 |

|         |          |       |     |     |   |    |     |     |     |          |      |
|---------|----------|-------|-----|-----|---|----|-----|-----|-----|----------|------|
| TcMYB41 | AtMYB109 | 45.45 | 55  | 30  | 0 | 34 | 198 | 102 | 156 | 4.00E-12 | 56.2 |
| TcMYB41 | AtMYB117 | 37.5  | 64  | 40  | 0 | 34 | 225 | 144 | 207 | 5.00E-12 | 55.8 |
| TcMYB41 | AtMYB70  | 40.32 | 62  | 37  | 0 | 34 | 219 | 59  | 120 | 9.00E-12 | 55.1 |
| TcMYB41 | ATMYB73  | 38.46 | 65  | 40  | 1 | 34 | 228 | 59  | 121 | 9.00E-12 | 55.1 |
| TcMYB41 | ATMYB119 | 41.07 | 56  | 33  | 0 | 40 | 207 | 153 | 208 | 1.00E-11 | 54.7 |
| TcMYB41 | ATMYB54  | 37.88 | 66  | 41  | 0 | 34 | 231 | 52  | 117 | 2.00E-11 | 53.9 |
| TcMYB41 | AtMYB64  | 41.07 | 56  | 33  | 0 | 40 | 207 | 153 | 208 | 2.00E-11 | 54.3 |
| TcMYB41 | ATMYB77  | 51.16 | 43  | 21  | 0 | 70 | 198 | 64  | 106 | 3.00E-11 | 53.5 |
| TcMYB41 | AtMYB115 | 38.46 | 52  | 32  | 0 | 40 | 195 | 206 | 257 | 3.00E-11 | 53.5 |
| TcMYB41 | AtMYB89  | 35.82 | 67  | 43  | 0 | 13 | 213 | 95  | 161 | 5.00E-11 | 52   |
| TcMYB41 | AtMYB1   | 45.28 | 53  | 29  | 0 | 40 | 198 | 103 | 155 | 7.00E-11 | 52.8 |
| TcMYB41 | ATMYB44  | 40    | 55  | 33  | 0 | 34 | 198 | 52  | 106 | 8.00E-11 | 52.4 |
| TcMYB41 | ATMYB91  | 31.25 | 64  | 44  | 0 | 34 | 225 | 53  | 116 | 2.00E-10 | 51.6 |
| TcMYB41 | AtMYB22  | 36.21 | 58  | 37  | 1 | 40 | 213 | 101 | 157 | 2.00E-10 | 51.2 |
| TcMYB41 | ATMYB110 | 40.68 | 59  | 35  | 1 | 37 | 213 | 115 | 172 | 2.00E-10 | 51.2 |
| TcMYB41 | ATMYB52  | 39.34 | 61  | 37  | 0 | 34 | 216 | 51  | 111 | 2.00E-10 | 50.8 |
| TcMYB41 | AtMYB56  | 30.3  | 66  | 46  | 0 | 34 | 231 | 139 | 204 | 5.00E-10 | 50.1 |
| TcMYB41 | ATMYB69  | 36.36 | 55  | 35  | 0 | 34 | 198 | 65  | 119 | 8.00E-09 | 46.2 |
| TcMYB41 | AtMYB124 | 44    | 50  | 28  | 0 | 49 | 198 | 76  | 125 | 8.00E-09 | 46.6 |
| TcMYB41 | ATMYB88  | 44    | 50  | 28  | 0 | 49 | 198 | 81  | 130 | 9.00E-09 | 46.6 |
| TcMYB42 | ATMYB123 | 66.67 | 111 | 32  | 1 | 28 | 345 | 43  | 153 | 6.00E-47 | 149  |
| TcMYB42 | ATMYB5   | 73.86 | 88  | 22  | 1 | 28 | 288 | 52  | 139 | 9.00E-45 | 143  |
| TcMYB42 | AtMYB6   | 61.11 | 108 | 34  | 1 | 28 | 327 | 41  | 148 | 1.00E-44 | 142  |
| TcMYB42 | ATMYB4   | 53.33 | 135 | 57  | 2 | 28 | 414 | 41  | 175 | 6.00E-44 | 142  |
| TcMYB42 | ATMYB66  | 47.4  | 154 | 78  | 2 | 31 | 483 | 46  | 199 | 2.00E-43 | 138  |
| TcMYB42 | ATMYB12  | 61.82 | 110 | 42  | 0 | 28 | 357 | 41  | 150 | 2.00E-43 | 142  |
| TcMYB42 | ATMYB3   | 78.95 | 76  | 16  | 0 | 28 | 255 | 41  | 116 | 3.00E-43 | 139  |
| TcMYB42 | AtMYB114 | 60.78 | 102 | 40  | 1 | 28 | 333 | 37  | 136 | 6.00E-43 | 135  |
| TcMYB42 | MYB7     | 77.22 | 79  | 18  | 0 | 28 | 264 | 41  | 119 | 1.00E-42 | 138  |
| TcMYB42 | MYB8     | 72.15 | 79  | 22  | 0 | 28 | 264 | 41  | 119 | 6.00E-42 | 134  |
| TcMYB42 | ATMYB111 | 80.26 | 76  | 15  | 0 | 28 | 255 | 41  | 116 | 7.00E-42 | 138  |
| TcMYB42 | AtMYB32  | 74.68 | 79  | 20  | 0 | 28 | 264 | 41  | 119 | 1.00E-41 | 135  |
| TcMYB42 | ATMYB75  | 43.9  | 164 | 89  | 3 | 28 | 510 | 37  | 197 | 7.00E-41 | 133  |
| TcMYB42 | ATMYB23  | 76    | 75  | 18  | 0 | 31 | 255 | 42  | 116 | 9.00E-41 | 132  |
| TcMYB42 | AtMYB107 | 55.93 | 118 | 46  | 1 | 28 | 363 | 41  | 158 | 1.00E-40 | 134  |
| TcMYB42 | AtMYB82  | 59.26 | 108 | 40  | 2 | 31 | 342 | 42  | 148 | 2.00E-40 | 130  |
| TcMYB42 | AtMYB49  | 70.79 | 89  | 20  | 1 | 28 | 276 | 41  | 129 | 3.00E-40 | 133  |
| TcMYB42 | ATMYB13  | 57.52 | 113 | 48  | 1 | 28 | 366 | 41  | 147 | 5.00E-40 | 130  |
| TcMYB42 | AtMYB9   | 57.52 | 113 | 42  | 1 | 28 | 348 | 41  | 153 | 5.00E-40 | 133  |
| TcMYB42 | ATMYB0   | 73.33 | 75  | 20  | 0 | 31 | 255 | 44  | 118 | 6.00E-40 | 130  |
| TcMYB42 | ATMYB90  | 60.78 | 102 | 40  | 1 | 28 | 333 | 37  | 137 | 8.00E-40 | 130  |
| TcMYB42 | ATMYB11  | 76.32 | 76  | 18  | 0 | 28 | 255 | 41  | 116 | 2.00E-39 | 131  |
| TcMYB42 | AtMYB85  | 38.84 | 224 | 112 | 8 | 28 | 624 | 41  | 264 | 3.00E-39 | 129  |
| TcMYB42 | AtMYB113 | 67.9  | 81  | 26  | 0 | 28 | 270 | 37  | 117 | 5.00E-39 | 128  |
| TcMYB42 | AtMYB53  | 75    | 76  | 19  | 0 | 28 | 255 | 41  | 116 | 6.00E-39 | 129  |
| TcMYB42 | AtMYB74  | 73.68 | 76  | 20  | 0 | 28 | 255 | 42  | 117 | 1.00E-38 | 129  |
| TcMYB42 | AtMYB42  | 65.22 | 92  | 32  | 0 | 28 | 303 | 41  | 132 | 1.00E-38 | 128  |
| TcMYB42 | ATMYB15  | 65.12 | 86  | 30  | 0 | 28 | 285 | 41  | 126 | 2.00E-38 | 127  |
| TcMYB42 | ATMYB86  | 60.36 | 111 | 37  | 2 | 28 | 339 | 41  | 151 | 2.00E-38 | 129  |
| TcMYB42 | ATMYB80  | 65.48 | 84  | 29  | 0 | 4  | 255 | 33  | 116 | 2.00E-38 | 128  |
| TcMYB42 | ATMYB102 | 75    | 76  | 19  | 0 | 28 | 255 | 41  | 116 | 3.00E-38 | 129  |
| TcMYB42 | ATMYB58  | 68.35 | 79  | 25  | 0 | 28 | 264 | 43  | 121 | 4.00E-38 | 126  |
| TcMYB42 | ATMYB84  | 70    | 80  | 24  | 0 | 28 | 267 | 42  | 121 | 5.00E-38 | 127  |
| TcMYB42 | AtMYB41  | 64.44 | 90  | 31  | 1 | 28 | 294 | 41  | 130 | 5.00E-38 | 126  |
| TcMYB42 | AtMYB17  | 73.68 | 76  | 20  | 0 | 28 | 255 | 41  | 116 | 7.00E-38 | 126  |
| TcMYB42 | ATMYB92  | 73.68 | 76  | 20  | 0 | 28 | 255 | 41  | 116 | 8.00E-38 | 127  |
| TcMYB42 | ATMYB61  | 48.89 | 135 | 65  | 1 | 28 | 420 | 41  | 175 | 1.00E-37 | 127  |
| TcMYB42 | ATMYB46  | 72    | 75  | 21  | 0 | 31 | 255 | 48  | 122 | 2.00E-37 | 125  |
| TcMYB42 | ATMYB35  | 65.48 | 84  | 29  | 0 | 4  | 255 | 33  | 116 | 2.00E-37 | 125  |
| TcMYB42 | ATMYB14  | 72.37 | 76  | 21  | 0 | 28 | 255 | 41  | 116 | 3.00E-37 | 124  |
| TcMYB42 | AtMYB50  | 69.62 | 79  | 24  | 0 | 28 | 264 | 41  | 119 | 3.00E-37 | 125  |
| TcMYB42 | ATMYB34  | 69.62 | 79  | 24  | 0 | 28 | 264 | 41  | 119 | 5.00E-37 | 124  |
| TcMYB42 | AtMYB51  | 72.15 | 79  | 22  | 0 | 28 | 264 | 42  | 120 | 6.00E-37 | 125  |
| TcMYB42 | ATMYB16  | 63.44 | 93  | 28  | 1 | 28 | 288 | 41  | 133 | 7.00E-37 | 124  |
| TcMYB42 | ATMYB106 | 73.68 | 76  | 20  | 0 | 28 | 255 | 84  | 159 | 1.00E-36 | 125  |
| TcMYB42 | ATMYB68  | 67.5  | 80  | 26  | 0 | 28 | 267 | 42  | 121 | 1.00E-36 | 125  |
| TcMYB42 | AtMYB83  | 70.13 | 77  | 23  | 0 | 31 | 261 | 60  | 136 | 2.00E-36 | 124  |
| TcMYB42 | ATMYB72  | 64.04 | 89  | 31  | 1 | 28 | 291 | 43  | 131 | 3.00E-36 | 122  |
| TcMYB42 | AtMYB103 | 69.74 | 76  | 23  | 0 | 28 | 255 | 41  | 116 | 3.00E-36 | 124  |
| TcMYB42 | ATMYB99  | 71.05 | 76  | 22  | 0 | 28 | 255 | 49  | 124 | 4.00E-36 | 120  |
| TcMYB42 | ATMYB63  | 68.42 | 76  | 24  | 0 | 28 | 255 | 43  | 118 | 4.00E-36 | 122  |
| TcMYB42 | ATMYB37  | 62.07 | 87  | 33  | 0 | 25 | 285 | 41  | 127 | 4.00E-36 | 122  |
| TcMYB42 | AtMYB10  | 61.63 | 86  | 33  | 0 | 28 | 285 | 43  | 128 | 4.00E-36 | 120  |
| TcMYB42 | AtMYB36  | 59.55 | 89  | 36  | 0 | 28 | 294 | 42  | 130 | 6.00E-36 | 122  |
| TcMYB42 | ATMYB29  | 69.62 | 79  | 24  | 0 | 28 | 264 | 41  | 119 | 9.00E-36 | 122  |
| TcMYB42 | AtMYB76  | 69.74 | 76  | 23  | 0 | 28 | 255 | 41  | 116 | 9.00E-36 | 122  |
| TcMYB42 | ATMYB67  | 64.47 | 76  | 27  | 0 | 28 | 255 | 51  | 126 | 1.00E-35 | 120  |
| TcMYB42 | ATMYB28  | 69.74 | 76  | 23  | 0 | 28 | 255 | 41  | 116 | 2.00E-35 | 122  |
| TcMYB42 | AtMYB47  | 51.89 | 106 | 51  | 0 | 4  | 321 | 33  | 138 | 2.00E-35 | 119  |
| TcMYB42 | ATMYB57  | 69.33 | 75  | 23  | 0 | 31 | 255 | 55  | 129 | 2.00E-35 | 117  |

|         |           |       |     |     |   |     |     |     |     |          |      |
|---------|-----------|-------|-----|-----|---|-----|-----|-----|-----|----------|------|
| TcMYB42 | ATMYB95   | 52.78 | 108 | 50  | 1 | 4   | 324 | 33  | 140 | 3.00E-35 | 119  |
| TcMYB42 | AtMYB93   | 71.05 | 76  | 22  | 0 | 28  | 255 | 41  | 116 | 3.00E-35 | 121  |
| TcMYB42 | ATMYB122  | 68.35 | 79  | 25  | 0 | 28  | 264 | 41  | 119 | 3.00E-35 | 120  |
| TcMYB42 | ATMYB2    | 63.75 | 80  | 29  | 0 | 31  | 270 | 50  | 129 | 4.00E-35 | 119  |
| TcMYB42 | AtMYB43   | 69.74 | 76  | 23  | 0 | 28  | 255 | 41  | 116 | 4.00E-35 | 120  |
| TcMYB42 | ATMYB55   | 75    | 72  | 18  | 0 | 40  | 255 | 57  | 128 | 4.00E-35 | 120  |
| TcMYB42 | AtMYB20   | 69.74 | 76  | 23  | 0 | 28  | 255 | 41  | 116 | 5.00E-35 | 119  |
| TcMYB42 | ATMYB87   | 62.5  | 80  | 30  | 0 | 28  | 267 | 42  | 121 | 7.00E-35 | 119  |
| TcMYB42 | AtMYB60   | 39.46 | 185 | 109 | 5 | 28  | 573 | 41  | 212 | 5.00E-34 | 116  |
| TcMYB42 | ATMYB3    | 60    | 85  | 34  | 0 | 31  | 285 | 50  | 134 | 5.00E-34 | 114  |
| TcMYB42 | AtMYB40   | 64.1  | 78  | 28  | 0 | 22  | 255 | 39  | 116 | 6.00E-34 | 115  |
| TcMYB42 | AtMYB108  | 40.85 | 164 | 97  | 2 | 37  | 528 | 51  | 203 | 2.00E-33 | 115  |
| TcMYB42 | ATMYB120  | 68    | 75  | 24  | 0 | 31  | 255 | 56  | 130 | 3.00E-33 | 117  |
| TcMYB42 | AtMYB24   | 67.12 | 73  | 24  | 0 | 31  | 249 | 47  | 119 | 4.00E-33 | 112  |
| TcMYB42 | AtMYB112  | 63.75 | 80  | 29  | 0 | 31  | 270 | 62  | 141 | 6.00E-33 | 112  |
| TcMYB42 | ATMYB38   | 59.76 | 82  | 33  | 0 | 28  | 273 | 42  | 123 | 7.00E-33 | 113  |
| TcMYB42 | AtMYB116  | 64.94 | 77  | 27  | 0 | 22  | 252 | 45  | 121 | 7.00E-33 | 113  |
| TcMYB42 | AtMYB62   | 37    | 200 | 124 | 6 | 31  | 624 | 49  | 238 | 8.00E-33 | 113  |
| TcMYB42 | AtMYB79   | 68.92 | 74  | 23  | 0 | 31  | 252 | 36  | 109 | 9.00E-33 | 112  |
| TcMYB42 | ATMYB26   | 61.18 | 85  | 24  | 1 | 28  | 255 | 41  | 125 | 2.00E-32 | 114  |
| TcMYB42 | ATMYB94   | 65.79 | 76  | 26  | 0 | 28  | 255 | 41  | 116 | 2.00E-32 | 113  |
| TcMYB42 | ATMYB59-3 | 59.04 | 83  | 34  | 0 | 31  | 279 | 38  | 120 | 2.00E-32 | 110  |
| TcMYB42 | ATMYB31   | 67.11 | 76  | 25  | 0 | 28  | 255 | 41  | 116 | 3.00E-32 | 112  |
| TcMYB42 | ATMYB101  | 64.86 | 74  | 26  | 0 | 31  | 252 | 48  | 121 | 3.00E-32 | 115  |
| TcMYB42 | AtMYB19   | 62.79 | 86  | 32  | 1 | 28  | 285 | 41  | 125 | 3.00E-32 | 111  |
| TcMYB42 | ATMYB30   | 65.79 | 76  | 26  | 0 | 28  | 255 | 41  | 116 | 3.00E-32 | 112  |
| TcMYB42 | AtMYB18   | 63.86 | 83  | 30  | 0 | 28  | 276 | 39  | 121 | 4.00E-32 | 111  |
| TcMYB42 | ATMYB71   | 69.44 | 72  | 22  | 0 | 37  | 252 | 50  | 121 | 4.00E-32 | 110  |
| TcMYB42 | ATMYB48   | 56.32 | 87  | 38  | 0 | 19  | 279 | 33  | 119 | 4.00E-32 | 110  |
| TcMYB42 | ATMYB96   | 65.79 | 76  | 26  | 0 | 28  | 255 | 41  | 116 | 5.00E-32 | 112  |
| TcMYB42 | AtMYB97   | 65.75 | 73  | 25  | 0 | 31  | 249 | 49  | 121 | 6.00E-32 | 112  |
| TcMYB42 | AtMYB27   | 66.67 | 72  | 24  | 0 | 37  | 252 | 41  | 112 | 1.00E-31 | 108  |
| TcMYB42 | AtMYB81   | 66.2  | 71  | 24  | 0 | 37  | 249 | 52  | 122 | 4.00E-31 | 111  |
| TcMYB42 | ATMYB33   | 63.51 | 74  | 27  | 0 | 31  | 252 | 62  | 135 | 6.00E-31 | 111  |
| TcMYB42 | ATMYB121  | 60.92 | 87  | 32  | 1 | 31  | 285 | 57  | 143 | 7.00E-31 | 107  |
| TcMYB42 | ATMYB65   | 60.81 | 74  | 29  | 0 | 31  | 252 | 71  | 144 | 3.00E-30 | 109  |
| TcMYB42 | AtMYB45   | 54.12 | 85  | 39  | 0 | 28  | 282 | 47  | 131 | 3.00E-29 | 103  |
| TcMYB42 | ATMYB78   | 55.43 | 92  | 27  | 1 | 37  | 270 | 58  | 149 | 9.00E-29 | 103  |
| TcMYB42 | AtMYB104  | 38.52 | 135 | 81  | 4 | 28  | 426 | 45  | 166 | 5.00E-25 | 94   |
| TcMYB42 | AtMYB98   | 50    | 80  | 40  | 1 | 49  | 288 | 250 | 328 | 2.00E-23 | 90.1 |
| TcMYB42 | AtMYB98   | 29.85 | 67  | 46  | 1 | 46  | 243 | 197 | 263 | 9.00E-05 | 35   |
| TcMYB42 | ATMYB105  | 30.11 | 176 | 114 | 5 | 49  | 549 | 140 | 315 | 1.00E-22 | 86.7 |
| TcMYB42 | ATMYB25   | 58.82 | 68  | 28  | 0 | 49  | 252 | 83  | 150 | 1.00E-22 | 87   |
| TcMYB42 | ATMYB54   | 48.68 | 76  | 39  | 0 | 49  | 276 | 39  | 114 | 1.00E-22 | 85.1 |
| TcMYB42 | ATMYB52   | 52.94 | 68  | 32  | 0 | 49  | 252 | 38  | 105 | 6.00E-22 | 83.6 |
| TcMYB42 | AtMYB117  | 52.94 | 68  | 32  | 0 | 49  | 252 | 131 | 198 | 6.00E-22 | 85.1 |
| TcMYB42 | AtMYB100  | 30.22 | 182 | 127 | 5 | 49  | 594 | 59  | 219 | 6.00E-22 | 83.2 |
| TcMYB42 | ATMYB44   | 54.41 | 68  | 31  | 0 | 49  | 252 | 39  | 106 | 1.00E-21 | 83.6 |
| TcMYB42 | ATMYB73   | 54.41 | 68  | 31  | 0 | 49  | 252 | 46  | 113 | 2.00E-21 | 83.6 |
| TcMYB42 | ATMYB73   | 30.3  | 66  | 45  | 1 | 106 | 300 | 13  | 78  | 6.00E-05 | 35.4 |
| TcMYB42 | AtMYB115  | 49.25 | 67  | 34  | 0 | 49  | 249 | 191 | 257 | 2.00E-21 | 83.6 |
| TcMYB42 | AtMYB70   | 52.94 | 68  | 32  | 0 | 49  | 252 | 46  | 113 | 4.00E-21 | 82.4 |
| TcMYB42 | AtMYB1    | 52.94 | 68  | 32  | 0 | 49  | 252 | 88  | 155 | 4.00E-21 | 83.2 |
| TcMYB42 | AtMYB1    | 33.93 | 56  | 36  | 1 | 91  | 255 | 50  | 105 | 2.00E-04 | 33.9 |
| TcMYB42 | ATMYB118  | 51.47 | 68  | 33  | 0 | 49  | 252 | 222 | 289 | 5.00E-21 | 83.2 |
| TcMYB42 | ATMYB118  | 30.77 | 52  | 35  | 1 | 91  | 243 | 184 | 235 | 0.001    | 32   |
| TcMYB42 | AtMYB109  | 55.88 | 68  | 30  | 0 | 49  | 252 | 89  | 156 | 5.00E-21 | 82.8 |
| TcMYB42 | AtMYB109  | 37.04 | 54  | 33  | 1 | 106 | 264 | 56  | 109 | 9.00E-05 | 35   |
| TcMYB42 | AtMYB64   | 45.57 | 79  | 43  | 0 | 49  | 285 | 138 | 216 | 8.00E-21 | 82.4 |
| TcMYB42 | AtMYB64   | 32    | 50  | 33  | 1 | 97  | 243 | 102 | 151 | 5.00E-04 | 32.7 |
| TcMYB42 | ATMYB119  | 50    | 68  | 34  | 0 | 49  | 252 | 138 | 205 | 2.00E-20 | 81.3 |
| TcMYB42 | ATMYB119  | 34.04 | 47  | 30  | 1 | 106 | 243 | 105 | 151 | 2.00E-04 | 34.3 |
| TcMYB42 | ATMYB110  | 49.28 | 69  | 35  | 0 | 49  | 255 | 100 | 168 | 3.00E-20 | 79.7 |
| TcMYB42 | AtMYB56   | 42.68 | 82  | 47  | 0 | 43  | 288 | 124 | 205 | 4.00E-20 | 79.7 |
| TcMYB42 | ATMYB69   | 48.53 | 68  | 35  | 0 | 49  | 252 | 52  | 119 | 6.00E-20 | 78.2 |
| TcMYB42 | ATMYB77   | 50    | 68  | 34  | 0 | 49  | 252 | 39  | 106 | 8.00E-20 | 78.6 |
| TcMYB42 | AtMYB22   | 41.67 | 72  | 42  | 1 | 49  | 264 | 86  | 156 | 4.00E-18 | 73.2 |
| TcMYB42 | AtMYB89   | 39.24 | 79  | 48  | 0 | 49  | 285 | 89  | 167 | 8.00E-17 | 68.6 |
| TcMYB42 | ATMYB91   | 46.03 | 63  | 34  | 0 | 43  | 231 | 38  | 100 | 2.00E-16 | 69.3 |
| TcMYB42 | ATMYB88   | 44.62 | 65  | 36  | 0 | 58  | 252 | 66  | 130 | 9.00E-15 | 65.1 |
| TcMYB42 | AtMYB124  | 43.08 | 65  | 37  | 0 | 58  | 252 | 61  | 125 | 3.00E-14 | 63.5 |
| TcMYB43 | ATMYB105  | 78.63 | 131 | 28  | 1 | 295 | 687 | 90  | 219 | 6.00E-70 | 218  |
| TcMYB43 | AtMYB117  | 70.55 | 146 | 41  | 1 | 256 | 687 | 65  | 210 | 3.00E-69 | 217  |
| TcMYB43 | AtMYB56   | 59.51 | 163 | 66  | 0 | 277 | 765 | 69  | 231 | 5.00E-66 | 207  |
| TcMYB43 | ATMYB52   | 76.32 | 114 | 27  | 0 | 340 | 681 | 2   | 115 | 3.00E-63 | 198  |
| TcMYB43 | ATMYB54   | 65.97 | 144 | 49  | 1 | 340 | 771 | 3   | 144 | 3.00E-63 | 197  |
| TcMYB43 | ATMYB110  | 66.67 | 135 | 45  | 1 | 280 | 684 | 45  | 178 | 6.00E-61 | 194  |
| TcMYB43 | ATMYB69   | 73.58 | 106 | 28  | 0 | 343 | 660 | 17  | 122 | 2.00E-55 | 177  |
| TcMYB43 | AtMYB89   | 52.14 | 140 | 67  | 1 | 247 | 666 | 33  | 161 | 8.00E-47 | 153  |
| TcMYB43 | AtMYB109  | 45.52 | 145 | 79  | 2 | 235 | 669 | 40  | 162 | 2.00E-39 | 139  |

|         |           |       |     |     |   |     |     |     |     |          |      |
|---------|-----------|-------|-----|-----|---|-----|-----|-----|-----|----------|------|
| TcMYB43 | ATMYB25   | 55.24 | 105 | 47  | 0 | 349 | 663 | 50  | 154 | 2.00E-39 | 138  |
| TcMYB43 | ATMYB44   | 55.45 | 101 | 45  | 0 | 349 | 651 | 6   | 106 | 3.00E-38 | 134  |
| TcMYB43 | AtMYB70   | 55.45 | 101 | 45  | 0 | 349 | 651 | 13  | 113 | 3.00E-37 | 131  |
| TcMYB43 | AtMYB1    | 47.06 | 136 | 72  | 2 | 247 | 654 | 24  | 156 | 9.00E-37 | 132  |
| TcMYB43 | ATMYB73   | 52.48 | 101 | 48  | 0 | 349 | 651 | 13  | 113 | 4.00E-36 | 128  |
| TcMYB43 | ATMYB77   | 52.48 | 101 | 48  | 0 | 349 | 651 | 6   | 106 | 2.00E-35 | 126  |
| TcMYB43 | ATMYB119  | 42.07 | 145 | 79  | 2 | 250 | 669 | 73  | 216 | 7.00E-32 | 119  |
| TcMYB43 | ATMYB66   | 34.22 | 187 | 108 | 5 | 349 | 864 | 18  | 203 | 2.00E-31 | 112  |
| TcMYB43 | AtMYB64   | 44.44 | 135 | 75  | 1 | 349 | 753 | 105 | 227 | 4.00E-30 | 114  |
| TcMYB43 | ATMYB23   | 48.04 | 102 | 52  | 1 | 349 | 651 | 14  | 115 | 3.00E-29 | 107  |
| TcMYB43 | ATMYB118  | 47.17 | 106 | 56  | 0 | 349 | 666 | 189 | 294 | 1.00E-28 | 109  |
| TcMYB43 | ATMYB0    | 47.06 | 102 | 53  | 1 | 349 | 651 | 16  | 117 | 3.00E-28 | 104  |
| TcMYB43 | ATMYB67   | 45.31 | 128 | 63  | 3 | 301 | 663 | 3   | 129 | 3.00E-28 | 106  |
| TcMYB43 | AtMYB115  | 43.12 | 109 | 62  | 0 | 322 | 648 | 149 | 257 | 3.00E-28 | 107  |
| TcMYB43 | ATMYB15   | 35.75 | 179 | 98  | 5 | 349 | 834 | 14  | 187 | 5.00E-28 | 105  |
| TcMYB43 | AtMYB10   | 46.3  | 108 | 56  | 2 | 349 | 666 | 16  | 122 | 5.00E-28 | 104  |
| TcMYB43 | AtMYB100  | 45.45 | 99  | 53  | 2 | 355 | 648 | 28  | 125 | 6.00E-28 | 103  |
| TcMYB43 | AtMYB103  | 47.01 | 117 | 60  | 2 | 349 | 693 | 14  | 129 | 7.00E-28 | 106  |
| TcMYB43 | ATMYB63   | 46.3  | 108 | 56  | 2 | 349 | 666 | 16  | 122 | 7.00E-28 | 105  |
| TcMYB43 | ATMYB121  | 41.26 | 143 | 77  | 3 | 331 | 738 | 23  | 164 | 1.00E-27 | 104  |
| TcMYB43 | AtMYB19   | 47.12 | 104 | 53  | 2 | 349 | 654 | 14  | 116 | 2.00E-27 | 103  |
| TcMYB43 | AtMYB27   | 44.25 | 113 | 61  | 3 | 349 | 681 | 11  | 120 | 2.00E-27 | 102  |
| TcMYB43 | AtMYB98   | 42.37 | 118 | 68  | 0 | 349 | 702 | 217 | 334 | 5.00E-27 | 105  |
| TcMYB43 | AtMYB18   | 37.31 | 134 | 82  | 2 | 349 | 744 | 12  | 144 | 7.00E-27 | 102  |
| TcMYB43 | ATMYB58   | 36.03 | 136 | 86  | 1 | 349 | 753 | 16  | 151 | 9.00E-27 | 101  |
| TcMYB43 | AtMYB51   | 47.06 | 102 | 53  | 1 | 349 | 651 | 15  | 116 | 9.00E-27 | 103  |
| TcMYB43 | AtMYB104  | 39.68 | 126 | 75  | 1 | 349 | 723 | 18  | 143 | 1.00E-26 | 103  |
| TcMYB43 | AtMYB45   | 34.97 | 163 | 95  | 4 | 349 | 804 | 20  | 181 | 1.00E-26 | 100  |
| TcMYB43 | AtMYB82   | 46.08 | 102 | 54  | 1 | 349 | 651 | 14  | 115 | 2.00E-26 | 98.6 |
| TcMYB43 | ATMYB13   | 38.82 | 152 | 83  | 5 | 349 | 774 | 14  | 164 | 3.00E-26 | 99.4 |
| TcMYB43 | ATMYB80   | 46.6  | 103 | 53  | 2 | 349 | 651 | 14  | 115 | 5.00E-26 | 100  |
| TcMYB43 | AtMYB97   | 38.73 | 142 | 86  | 2 | 349 | 771 | 21  | 159 | 7.00E-26 | 101  |
| TcMYB43 | ATMYB35   | 39.39 | 132 | 79  | 2 | 349 | 741 | 14  | 143 | 9.00E-26 | 99.8 |
| TcMYB43 | ATMYB72   | 44.04 | 109 | 59  | 2 | 349 | 669 | 16  | 123 | 1.00E-25 | 99   |
| TcMYB43 | AtMYB40   | 45.71 | 105 | 55  | 2 | 349 | 657 | 14  | 117 | 2.00E-25 | 97.8 |
| TcMYB43 | AtMYB81   | 41.22 | 131 | 76  | 2 | 286 | 675 | 9   | 131 | 2.00E-25 | 100  |
| TcMYB43 | AtMYB53   | 47.57 | 103 | 52  | 2 | 349 | 651 | 14  | 115 | 2.00E-25 | 98.6 |
| TcMYB43 | ATMYB101  | 41.73 | 127 | 72  | 3 | 328 | 702 | 13  | 134 | 2.00E-25 | 100  |
| TcMYB43 | ATMYB59-3 | 37.93 | 145 | 88  | 3 | 349 | 777 | 10  | 152 | 2.00E-25 | 96.7 |
| TcMYB43 | ATMYB120  | 36.91 | 149 | 93  | 3 | 232 | 675 | 4   | 137 | 3.00E-25 | 100  |
| TcMYB43 | ATMYB48   | 44.86 | 107 | 57  | 2 | 349 | 663 | 9   | 114 | 4.00E-25 | 96.7 |
| TcMYB43 | ATMYB46   | 40    | 115 | 67  | 2 | 331 | 669 | 14  | 127 | 4.00E-25 | 97.1 |
| TcMYB43 | AtMYB49   | 45.1  | 102 | 55  | 1 | 349 | 651 | 14  | 115 | 6.00E-25 | 97.4 |
| TcMYB43 | AtMYB41   | 44.12 | 102 | 56  | 1 | 349 | 651 | 14  | 115 | 6.00E-25 | 96.7 |
| TcMYB43 | AtMYB36   | 40    | 140 | 82  | 5 | 349 | 762 | 14  | 142 | 7.00E-25 | 97.4 |
| TcMYB43 | ATMYB68   | 37.76 | 143 | 84  | 4 | 349 | 762 | 14  | 152 | 9.00E-25 | 97.8 |
| TcMYB43 | ATMYB95   | 43.69 | 103 | 56  | 2 | 349 | 651 | 14  | 115 | 9.00E-25 | 95.9 |
| TcMYB43 | ATMYB122  | 46.88 | 96  | 50  | 1 | 349 | 633 | 14  | 109 | 1.00E-24 | 97.1 |
| TcMYB43 | ATMYB34   | 41.38 | 116 | 67  | 2 | 319 | 663 | 9   | 119 | 1.00E-24 | 96.3 |
| TcMYB43 | AtMYB79   | 40.8  | 125 | 72  | 2 | 349 | 717 | 8   | 131 | 1.00E-24 | 95.5 |
| TcMYB43 | ATMYB33   | 33.95 | 162 | 106 | 2 | 259 | 741 | 11  | 165 | 1.00E-24 | 99   |
| TcMYB43 | ATMYB65   | 35    | 140 | 86  | 2 | 271 | 675 | 13  | 152 | 1.00E-24 | 99   |
| TcMYB43 | AtMYB114  | 40.78 | 103 | 60  | 1 | 349 | 654 | 10  | 112 | 1.00E-24 | 91.7 |
| TcMYB43 | ATMYB5    | 42.45 | 106 | 60  | 1 | 349 | 663 | 25  | 130 | 2.00E-24 | 94.7 |
| TcMYB43 | ATMYB86   | 42.99 | 107 | 59  | 2 | 349 | 663 | 14  | 119 | 2.00E-24 | 96.7 |
| TcMYB43 | ATMYB3    | 45.63 | 103 | 54  | 2 | 349 | 651 | 14  | 115 | 2.00E-24 | 94.7 |
| TcMYB43 | AtMYB32   | 38.93 | 131 | 78  | 2 | 349 | 735 | 14  | 143 | 2.00E-24 | 95.1 |
| TcMYB43 | MYB8      | 42.16 | 102 | 58  | 1 | 349 | 651 | 14  | 115 | 2.00E-24 | 93.6 |
| TcMYB43 | ATMYB61   | 37.93 | 145 | 87  | 4 | 349 | 774 | 14  | 151 | 2.00E-24 | 96.7 |
| TcMYB43 | AtMYB107  | 45.1  | 102 | 55  | 1 | 349 | 651 | 14  | 115 | 2.00E-24 | 95.9 |
| TcMYB43 | ATMYB92   | 46.6  | 103 | 53  | 2 | 349 | 651 | 14  | 115 | 2.00E-24 | 95.9 |
| TcMYB43 | AtMYB9    | 45.1  | 102 | 55  | 1 | 349 | 651 | 14  | 115 | 3.00E-24 | 95.9 |
| TcMYB43 | ATMYB71   | 39.84 | 123 | 72  | 2 | 349 | 711 | 20  | 141 | 3.00E-24 | 94.4 |
| TcMYB43 | ATMYB84   | 43.69 | 103 | 56  | 2 | 349 | 651 | 14  | 116 | 3.00E-24 | 95.1 |
| TcMYB43 | AtMYB116  | 37.88 | 132 | 80  | 3 | 319 | 708 | 13  | 140 | 4.00E-24 | 94.4 |
| TcMYB43 | ATMYB14   | 42.61 | 115 | 64  | 2 | 349 | 687 | 14  | 127 | 4.00E-24 | 93.6 |
| TcMYB43 | AtMYB74   | 44.66 | 103 | 55  | 2 | 349 | 651 | 15  | 116 | 5.00E-24 | 94.7 |
| TcMYB43 | ATMYB123  | 36.55 | 145 | 91  | 4 | 349 | 780 | 16  | 141 | 6.00E-24 | 93.2 |
| TcMYB43 | ATMYB4    | 44.66 | 103 | 55  | 2 | 349 | 651 | 14  | 115 | 7.00E-24 | 93.6 |
| TcMYB43 | ATMYB55   | 33.14 | 175 | 84  | 5 | 349 | 774 | 14  | 185 | 7.00E-24 | 94.7 |
| TcMYB43 | AtMYB22   | 32.39 | 142 | 90  | 3 | 274 | 681 | 23  | 163 | 1.00E-23 | 92.4 |
| TcMYB43 | AtMYB50   | 43.69 | 103 | 56  | 2 | 349 | 651 | 14  | 115 | 1.00E-23 | 93.6 |
| TcMYB43 | ATMYB2    | 47.37 | 95  | 49  | 1 | 349 | 630 | 22  | 116 | 2.00E-23 | 92.4 |
| TcMYB43 | ATMYB28   | 43.4  | 106 | 59  | 1 | 349 | 663 | 14  | 119 | 2.00E-23 | 94   |
| TcMYB43 | AtMYB17   | 44.66 | 103 | 55  | 2 | 349 | 651 | 14  | 115 | 2.00E-23 | 92.8 |
| TcMYB43 | AtMYB83   | 41.67 | 108 | 62  | 1 | 349 | 669 | 32  | 139 | 2.00E-23 | 93.6 |
| TcMYB43 | ATMYB75   | 40.78 | 103 | 60  | 1 | 349 | 654 | 10  | 112 | 2.00E-23 | 91.7 |
| TcMYB43 | AtMYB47   | 40.78 | 103 | 59  | 2 | 349 | 651 | 14  | 115 | 2.00E-23 | 92   |
| TcMYB43 | AtMYB6    | 42.72 | 103 | 57  | 2 | 349 | 651 | 14  | 115 | 2.00E-23 | 91.3 |
| TcMYB43 | ATMYB106  | 44.66 | 103 | 55  | 2 | 349 | 651 | 57  | 158 | 2.00E-23 | 94   |

|         |           |       |     |     |   |     |     |    |     |          |      |
|---------|-----------|-------|-----|-----|---|-----|-----|----|-----|----------|------|
| TcMYB43 | AtMYB112  | 41.44 | 111 | 64  | 2 | 301 | 630 | 19 | 128 | 2.00E-23 | 91.3 |
| TcMYB43 | ATMYB90   | 34.9  | 149 | 93  | 2 | 349 | 783 | 10 | 158 | 3.00E-23 | 91.3 |
| TcMYB43 | ATMYB94   | 41.67 | 108 | 62  | 1 | 349 | 669 | 14 | 121 | 3.00E-23 | 92.8 |
| TcMYB43 | ATMYB30   | 36.69 | 139 | 87  | 2 | 349 | 762 | 14 | 146 | 3.00E-23 | 92.4 |
| TcMYB43 | ATMYB102  | 44.66 | 103 | 55  | 2 | 349 | 651 | 14 | 115 | 5.00E-23 | 92.4 |
| TcMYB43 | AtMYB62   | 34.87 | 152 | 87  | 4 | 349 | 768 | 21 | 171 | 5.00E-23 | 91.3 |
| TcMYB43 | MYB7      | 41.75 | 103 | 58  | 2 | 349 | 651 | 14 | 115 | 7.00E-23 | 90.5 |
| TcMYB43 | AtMYB93   | 43.14 | 102 | 57  | 1 | 349 | 651 | 14 | 115 | 8.00E-23 | 92   |
| TcMYB43 | ATMYB38   | 43.69 | 103 | 56  | 2 | 349 | 651 | 14 | 116 | 8.00E-23 | 90.9 |
| TcMYB43 | ATMYB16   | 42.16 | 102 | 58  | 1 | 349 | 651 | 14 | 115 | 9.00E-23 | 91.3 |
| TcMYB43 | ATMYB96   | 38.06 | 134 | 80  | 2 | 349 | 741 | 14 | 147 | 9.00E-23 | 91.7 |
| TcMYB43 | AtMYB60   | 37.14 | 140 | 78  | 3 | 349 | 738 | 14 | 153 | 1.00E-22 | 90.1 |
| TcMYB43 | AtMYB43   | 39.2  | 125 | 74  | 2 | 349 | 717 | 14 | 137 | 1.00E-22 | 90.9 |
| TcMYB43 | AtMYB76   | 45.1  | 102 | 55  | 1 | 349 | 651 | 14 | 115 | 1.00E-22 | 90.9 |
| TcMYB43 | ATMYB3    | 36.73 | 147 | 92  | 4 | 235 | 672 | 5  | 129 | 1.00E-22 | 88.6 |
| TcMYB43 | ATMYB31   | 44.12 | 102 | 56  | 1 | 349 | 651 | 14 | 115 | 2.00E-22 | 90.5 |
| TcMYB43 | AtMYB113  | 38.68 | 106 | 64  | 1 | 349 | 663 | 10 | 115 | 2.00E-22 | 88.6 |
| TcMYB43 | ATMYB57   | 29.89 | 174 | 120 | 4 | 349 | 864 | 27 | 188 | 2.00E-22 | 87.4 |
| TcMYB43 | AtMYB108  | 43.52 | 108 | 59  | 3 | 313 | 630 | 12 | 115 | 3.00E-22 | 89.7 |
| TcMYB43 | ATMYB111  | 37.14 | 140 | 87  | 2 | 349 | 765 | 14 | 151 | 4.00E-22 | 89.7 |
| TcMYB43 | ATMYB29   | 45.83 | 96  | 51  | 1 | 349 | 633 | 14 | 109 | 5.00E-22 | 89.4 |
| TcMYB43 | ATMYB37   | 40    | 110 | 63  | 2 | 349 | 669 | 14 | 122 | 8.00E-22 | 88.6 |
| TcMYB43 | AtMYB20   | 41.51 | 106 | 60  | 2 | 349 | 660 | 14 | 118 | 1.00E-21 | 87   |
| TcMYB43 | AtMYB42   | 42.72 | 103 | 57  | 2 | 349 | 651 | 14 | 115 | 1.00E-21 | 87   |
| TcMYB43 | ATMYB11   | 34.56 | 136 | 76  | 2 | 349 | 717 | 14 | 149 | 3.00E-21 | 87   |
| TcMYB43 | AtMYB24   | 42.11 | 95  | 54  | 1 | 349 | 630 | 19 | 113 | 3.00E-21 | 84.3 |
| TcMYB43 | AtMYB85   | 42.72 | 103 | 57  | 2 | 349 | 651 | 14 | 115 | 4.00E-21 | 85.5 |
| TcMYB43 | ATMYB26   | 39.64 | 111 | 57  | 2 | 349 | 651 | 14 | 124 | 4.00E-21 | 87   |
| TcMYB43 | ATMYB12   | 40.2  | 102 | 60  | 1 | 349 | 651 | 14 | 115 | 7.00E-21 | 86.3 |
| TcMYB43 | ATMYB88   | 36.89 | 103 | 65  | 0 | 358 | 666 | 33 | 135 | 1.00E-20 | 86.7 |
| TcMYB43 | ATMYB87   | 38.83 | 103 | 61  | 2 | 349 | 651 | 14 | 116 | 1.00E-20 | 84.7 |
| TcMYB43 | AtMYB124  | 36.89 | 103 | 65  | 0 | 358 | 666 | 28 | 130 | 2.00E-20 | 85.9 |
| TcMYB43 | ATMYB99   | 42.73 | 110 | 54  | 4 | 349 | 651 | 15 | 123 | 4.00E-20 | 82   |
| TcMYB43 | ATMYB91   | 35.9  | 117 | 72  | 1 | 349 | 690 | 4  | 120 | 1.00E-19 | 82.8 |
| TcMYB43 | ATMYB78   | 34.51 | 142 | 78  | 4 | 250 | 630 | 2  | 136 | 2.00E-19 | 81.3 |
| TcMYB44 | AtMYB108  | 79.49 | 78  | 16  | 0 | 10  | 243 | 50 | 127 | 3.00E-42 | 139  |
| TcMYB44 | AtMYB62   | 55.28 | 123 | 46  | 3 | 10  | 351 | 50 | 169 | 5.00E-42 | 137  |
| TcMYB44 | ATMYB3    | 58.18 | 110 | 46  | 1 | 13  | 342 | 52 | 154 | 6.00E-42 | 135  |
| TcMYB44 | ATMYB2    | 70.65 | 92  | 27  | 1 | 13  | 288 | 52 | 142 | 8.00E-42 | 136  |
| TcMYB44 | ATMYB48   | 48.55 | 138 | 70  | 2 | 13  | 423 | 39 | 167 | 3.00E-40 | 132  |
| TcMYB44 | AtMYB112  | 46.43 | 140 | 75  | 1 | 13  | 432 | 64 | 200 | 3.00E-40 | 131  |
| TcMYB44 | ATMYB59-3 | 42.5  | 160 | 75  | 3 | 13  | 441 | 40 | 199 | 4.00E-40 | 131  |
| TcMYB44 | AtMYB24   | 78.87 | 71  | 15  | 0 | 13  | 225 | 49 | 119 | 2.00E-39 | 129  |
| TcMYB44 | AtMYB116  | 69.05 | 84  | 26  | 1 | 13  | 264 | 50 | 130 | 6.00E-39 | 129  |
| TcMYB44 | ATMYB57   | 43.48 | 161 | 89  | 3 | 13  | 489 | 57 | 206 | 3.00E-38 | 125  |
| TcMYB44 | ATMYB78   | 67.39 | 92  | 16  | 1 | 10  | 243 | 57 | 148 | 1.00E-37 | 127  |
| TcMYB44 | ATMYB121  | 72.97 | 74  | 20  | 0 | 10  | 231 | 58 | 131 | 2.00E-37 | 125  |
| TcMYB44 | AtMYB79   | 74.65 | 71  | 18  | 0 | 13  | 225 | 38 | 108 | 1.00E-35 | 120  |
| TcMYB44 | AtMYB27   | 69.86 | 73  | 22  | 0 | 13  | 231 | 41 | 113 | 2.00E-35 | 119  |
| TcMYB44 | ATMYB71   | 74.65 | 71  | 18  | 0 | 13  | 225 | 50 | 120 | 2.00E-35 | 119  |
| TcMYB44 | ATMYB66   | 40.26 | 154 | 88  | 2 | 13  | 462 | 48 | 201 | 1.00E-33 | 113  |
| TcMYB44 | ATMYB23   | 39.07 | 151 | 86  | 2 | 13  | 447 | 44 | 194 | 5.00E-32 | 109  |
| TcMYB44 | AtMYB10   | 47.27 | 110 | 58  | 1 | 13  | 342 | 46 | 151 | 6.00E-32 | 110  |
| TcMYB44 | ATMYB58   | 34.95 | 206 | 118 | 5 | 13  | 582 | 46 | 237 | 8.00E-32 | 110  |
| TcMYB44 | ATMYB63   | 66.67 | 75  | 25  | 0 | 13  | 237 | 46 | 120 | 9.00E-32 | 110  |
| TcMYB44 | AtMYB32   | 67.61 | 71  | 23  | 0 | 13  | 225 | 44 | 114 | 2.00E-31 | 109  |
| TcMYB44 | ATMYB0    | 56.18 | 89  | 39  | 1 | 13  | 279 | 46 | 129 | 2.00E-31 | 108  |
| TcMYB44 | AtMYB40   | 40.58 | 138 | 80  | 2 | 13  | 420 | 44 | 180 | 3.00E-31 | 108  |
| TcMYB44 | AtMYB107  | 65.33 | 75  | 26  | 0 | 13  | 237 | 44 | 118 | 3.00E-31 | 110  |
| TcMYB44 | ATMYB99   | 67.61 | 71  | 23  | 0 | 13  | 225 | 52 | 122 | 5.00E-31 | 107  |
| TcMYB44 | AtMYB19   | 64.79 | 71  | 25  | 0 | 13  | 225 | 44 | 114 | 6.00E-31 | 108  |
| TcMYB44 | ATMYB123  | 64.56 | 79  | 24  | 1 | 13  | 237 | 46 | 124 | 6.00E-31 | 107  |
| TcMYB44 | ATMYB46   | 44.88 | 127 | 70  | 2 | 13  | 393 | 50 | 172 | 7.00E-31 | 108  |
| TcMYB44 | ATMYB14   | 47.54 | 122 | 59  | 3 | 13  | 363 | 44 | 160 | 7.00E-31 | 107  |
| TcMYB44 | AtMYB49   | 67.61 | 71  | 23  | 0 | 13  | 225 | 44 | 114 | 8.00E-31 | 108  |
| TcMYB44 | ATMYB3    | 67.61 | 71  | 23  | 0 | 13  | 225 | 44 | 114 | 9.00E-31 | 107  |
| TcMYB44 | ATMYB29   | 66.2  | 71  | 24  | 0 | 13  | 225 | 44 | 114 | 3.00E-30 | 107  |
| TcMYB44 | ATMYB5    | 67.61 | 71  | 23  | 0 | 13  | 225 | 55 | 125 | 3.00E-30 | 105  |
| TcMYB44 | AtMYB18   | 38.73 | 142 | 86  | 2 | 13  | 435 | 42 | 182 | 3.00E-30 | 106  |
| TcMYB44 | AtMYB76   | 64.79 | 71  | 25  | 0 | 13  | 225 | 44 | 114 | 4.00E-30 | 107  |
| TcMYB44 | AtMYB20   | 66.2  | 71  | 24  | 0 | 13  | 225 | 44 | 114 | 4.00E-30 | 106  |
| TcMYB44 | ATMYB28   | 48.62 | 109 | 49  | 1 | 13  | 318 | 44 | 152 | 4.00E-30 | 107  |
| TcMYB44 | ATMYB12   | 66.2  | 71  | 24  | 0 | 13  | 225 | 44 | 114 | 5.00E-30 | 107  |
| TcMYB44 | ATMYB13   | 42.75 | 138 | 74  | 1 | 13  | 411 | 44 | 181 | 5.00E-30 | 105  |
| TcMYB44 | MYB7      | 66.2  | 71  | 24  | 0 | 13  | 225 | 44 | 114 | 6.00E-30 | 105  |
| TcMYB44 | AtMYB85   | 63.38 | 71  | 26  | 0 | 13  | 225 | 44 | 114 | 8.00E-30 | 105  |
| TcMYB44 | AtMYB83   | 50.94 | 106 | 50  | 2 | 13  | 324 | 62 | 163 | 8.00E-30 | 106  |
| TcMYB44 | AtMYB103  | 66.2  | 71  | 24  | 0 | 13  | 225 | 44 | 114 | 9.00E-30 | 107  |
| TcMYB44 | ATMYB96   | 35.94 | 192 | 123 | 3 | 13  | 588 | 44 | 213 | 9.00E-30 | 106  |
| TcMYB44 | AtMYB51   | 67.61 | 71  | 23  | 0 | 13  | 225 | 45 | 115 | 9.00E-30 | 106  |

|         |          |       |     |     |   |    |     |     |     |          |      |
|---------|----------|-------|-----|-----|---|----|-----|-----|-----|----------|------|
| TcMYB44 | AtMYB82  | 63.38 | 71  | 26  | 0 | 13 | 225 | 44  | 114 | 1.00E-29 | 103  |
| TcMYB44 | ATMYB4   | 66.2  | 71  | 24  | 0 | 13 | 225 | 44  | 114 | 1.00E-29 | 105  |
| TcMYB44 | ATMYB15  | 62.34 | 77  | 29  | 0 | 13 | 243 | 44  | 120 | 1.00E-29 | 105  |
| TcMYB44 | AtMYB6   | 64.79 | 71  | 25  | 0 | 13 | 225 | 44  | 114 | 1.00E-29 | 103  |
| TcMYB44 | AtMYB43  | 66.2  | 71  | 24  | 0 | 13 | 225 | 44  | 114 | 1.00E-29 | 105  |
| TcMYB44 | AtMYB53  | 62.67 | 75  | 28  | 0 | 13 | 237 | 44  | 118 | 1.00E-29 | 105  |
| TcMYB44 | MYB8     | 65.71 | 70  | 24  | 0 | 16 | 225 | 45  | 114 | 1.00E-29 | 103  |
| TcMYB44 | AtMYB9   | 62.67 | 75  | 28  | 0 | 13 | 237 | 44  | 118 | 1.00E-29 | 105  |
| TcMYB44 | ATMYB106 | 64.79 | 71  | 25  | 0 | 13 | 225 | 87  | 157 | 1.00E-29 | 106  |
| TcMYB44 | ATMYB16  | 64.79 | 71  | 25  | 0 | 13 | 225 | 44  | 114 | 2.00E-29 | 105  |
| TcMYB44 | AtMYB42  | 64.79 | 71  | 25  | 0 | 13 | 225 | 44  | 114 | 3.00E-29 | 103  |
| TcMYB44 | ATMYB86  | 35.52 | 183 | 111 | 5 | 13 | 540 | 44  | 223 | 3.00E-29 | 105  |
| TcMYB44 | ATMYB111 | 57.5  | 80  | 34  | 0 | 13 | 252 | 44  | 123 | 4.00E-29 | 104  |
| TcMYB44 | ATMYB33  | 63.01 | 73  | 27  | 0 | 13 | 231 | 64  | 136 | 4.00E-29 | 106  |
| TcMYB44 | AtMYB74  | 63.38 | 71  | 26  | 0 | 13 | 225 | 45  | 115 | 4.00E-29 | 104  |
| TcMYB44 | AtMYB50  | 66.2  | 71  | 24  | 0 | 13 | 225 | 44  | 114 | 7.00E-29 | 103  |
| TcMYB44 | AtMYB45  | 44.76 | 105 | 56  | 1 | 13 | 321 | 50  | 154 | 8.00E-29 | 102  |
| TcMYB44 | ATMYB61  | 64    | 75  | 27  | 0 | 13 | 237 | 44  | 118 | 1.00E-28 | 103  |
| TcMYB44 | ATMYB26  | 63.77 | 69  | 25  | 0 | 19 | 225 | 55  | 123 | 1.00E-28 | 103  |
| TcMYB44 | ATMYB65  | 60.27 | 73  | 29  | 0 | 13 | 231 | 73  | 145 | 1.00E-28 | 105  |
| TcMYB44 | ATMYB11  | 63.38 | 71  | 26  | 0 | 13 | 225 | 44  | 114 | 2.00E-28 | 103  |
| TcMYB44 | AtMYB36  | 52.63 | 95  | 44  | 1 | 16 | 297 | 46  | 140 | 2.00E-28 | 102  |
| TcMYB44 | AtMYB41  | 61.97 | 71  | 27  | 0 | 13 | 225 | 44  | 114 | 2.00E-28 | 101  |
| TcMYB44 | ATMYB94  | 48.18 | 110 | 50  | 3 | 13 | 321 | 44  | 150 | 3.00E-28 | 102  |
| TcMYB44 | ATMYB72  | 43.55 | 124 | 68  | 1 | 13 | 378 | 46  | 169 | 3.00E-28 | 101  |
| TcMYB44 | ATMYB38  | 47.12 | 104 | 55  | 0 | 13 | 324 | 45  | 148 | 3.00E-28 | 101  |
| TcMYB44 | ATMYB87  | 48.54 | 103 | 47  | 1 | 16 | 306 | 46  | 148 | 3.00E-28 | 101  |
| TcMYB44 | ATMYB102 | 61.97 | 71  | 27  | 0 | 13 | 225 | 44  | 114 | 3.00E-28 | 102  |
| TcMYB44 | ATMYB101 | 58.9  | 73  | 30  | 0 | 13 | 231 | 50  | 122 | 3.00E-28 | 103  |
| TcMYB44 | ATMYB67  | 57.75 | 71  | 30  | 0 | 13 | 225 | 54  | 124 | 3.00E-28 | 101  |
| TcMYB44 | ATMYB95  | 39.23 | 130 | 79  | 1 | 13 | 402 | 44  | 172 | 4.00E-28 | 100  |
| TcMYB44 | AtMYB97  | 58.9  | 73  | 30  | 0 | 19 | 237 | 53  | 125 | 4.00E-28 | 102  |
| TcMYB44 | ATMYB31  | 46.02 | 113 | 61  | 1 | 13 | 351 | 44  | 153 | 5.00E-28 | 101  |
| TcMYB44 | ATMYB84  | 43.31 | 127 | 72  | 2 | 16 | 396 | 46  | 150 | 5.00E-28 | 101  |
| TcMYB44 | ATMYB30  | 50.5  | 101 | 45  | 2 | 13 | 300 | 44  | 143 | 6.00E-28 | 101  |
| TcMYB44 | AtMYB17  | 61.97 | 71  | 27  | 0 | 13 | 225 | 44  | 114 | 8.00E-28 | 100  |
| TcMYB44 | AtMYB60  | 43.97 | 116 | 58  | 2 | 13 | 339 | 44  | 159 | 8.00E-28 | 100  |
| TcMYB44 | ATMYB55  | 64.29 | 70  | 25  | 0 | 16 | 225 | 57  | 126 | 9.00E-28 | 101  |
| TcMYB44 | ATMYB92  | 60    | 75  | 30  | 0 | 13 | 237 | 44  | 118 | 1.00E-27 | 100  |
| TcMYB44 | ATMYB120 | 57.33 | 75  | 32  | 0 | 13 | 237 | 58  | 132 | 1.00E-27 | 102  |
| TcMYB44 | ATMYB80  | 59.15 | 71  | 29  | 0 | 13 | 225 | 44  | 114 | 2.00E-27 | 100  |
| TcMYB44 | ATMYB37  | 60.56 | 71  | 28  | 0 | 13 | 225 | 45  | 115 | 2.00E-27 | 100  |
| TcMYB44 | ATMYB34  | 60    | 75  | 30  | 0 | 13 | 237 | 44  | 118 | 3.00E-27 | 99   |
| TcMYB44 | ATMYB122 | 61.97 | 71  | 27  | 0 | 13 | 225 | 44  | 114 | 4.00E-27 | 99.4 |
| TcMYB44 | AtMYB114 | 59.15 | 71  | 29  | 0 | 13 | 225 | 40  | 110 | 4.00E-27 | 94.7 |
| TcMYB44 | AtMYB81  | 57.53 | 73  | 31  | 0 | 13 | 231 | 52  | 124 | 4.00E-27 | 100  |
| TcMYB44 | AtMYB93  | 61.64 | 73  | 28  | 0 | 19 | 237 | 46  | 118 | 4.00E-27 | 99.8 |
| TcMYB44 | ATMYB35  | 34.55 | 165 | 97  | 3 | 13 | 474 | 44  | 208 | 1.00E-26 | 97.8 |
| TcMYB44 | ATMYB68  | 62.86 | 70  | 26  | 0 | 16 | 225 | 46  | 115 | 1.00E-26 | 98.6 |
| TcMYB44 | ATMYB90  | 47.92 | 96  | 50  | 1 | 13 | 300 | 40  | 132 | 1.00E-26 | 96.3 |
| TcMYB44 | ATMYB75  | 59.15 | 71  | 29  | 0 | 13 | 225 | 40  | 110 | 2.00E-26 | 95.5 |
| TcMYB44 | AtMYB113 | 59.15 | 71  | 29  | 0 | 13 | 225 | 40  | 110 | 3.00E-26 | 95.1 |
| TcMYB44 | AtMYB47  | 54.93 | 71  | 32  | 0 | 13 | 225 | 44  | 114 | 9.00E-26 | 94.4 |
| TcMYB44 | AtMYB104 | 52.94 | 68  | 32  | 0 | 13 | 216 | 48  | 115 | 4.00E-22 | 86.3 |
| TcMYB44 | AtMYB70  | 55.22 | 67  | 30  | 0 | 25 | 225 | 46  | 112 | 4.00E-21 | 82.4 |
| TcMYB44 | ATMYB25  | 50.7  | 71  | 35  | 0 | 25 | 237 | 83  | 153 | 1.00E-20 | 82   |
| TcMYB44 | ATMYB54  | 40.86 | 93  | 55  | 0 | 25 | 303 | 39  | 131 | 1.00E-20 | 80.1 |
| TcMYB44 | ATMYB73  | 52.24 | 67  | 32  | 0 | 25 | 225 | 46  | 112 | 3.00E-20 | 80.1 |
| TcMYB44 | ATMYB52  | 57.38 | 61  | 26  | 0 | 25 | 207 | 38  | 98  | 5.00E-20 | 78.6 |
| TcMYB44 | ATMYB44  | 48.61 | 72  | 37  | 0 | 25 | 240 | 39  | 110 | 8.00E-20 | 79   |
| TcMYB44 | AtMYB117 | 43.24 | 74  | 42  | 0 | 25 | 246 | 131 | 204 | 2.00E-19 | 78.6 |
| TcMYB44 | ATMYB105 | 52.46 | 61  | 29  | 0 | 25 | 207 | 140 | 200 | 2.00E-19 | 78.2 |
| TcMYB44 | ATMYB91  | 43.59 | 78  | 44  | 0 | 19 | 252 | 38  | 115 | 2.00E-19 | 78.2 |
| TcMYB44 | AtMYB109 | 41.05 | 95  | 55  | 1 | 25 | 306 | 89  | 183 | 4.00E-19 | 77.8 |
| TcMYB44 | AtMYB115 | 34.48 | 116 | 68  | 2 | 25 | 348 | 191 | 303 | 4.00E-19 | 77.4 |
| TcMYB44 | AtMYB56  | 46.84 | 79  | 36  | 1 | 19 | 237 | 124 | 202 | 4.00E-19 | 77   |
| TcMYB44 | AtMYB1   | 37.14 | 105 | 63  | 1 | 25 | 330 | 88  | 192 | 5.00E-19 | 77.4 |
| TcMYB44 | AtMYB64  | 34.86 | 109 | 71  | 1 | 25 | 351 | 138 | 245 | 8.00E-19 | 77   |
| TcMYB44 | ATMYB77  | 49.25 | 67  | 34  | 0 | 25 | 225 | 39  | 105 | 2.00E-18 | 75.1 |
| TcMYB44 | AtMYB100 | 44.93 | 69  | 38  | 0 | 25 | 231 | 59  | 127 | 2.00E-18 | 73.9 |
| TcMYB44 | ATMYB69  | 45.24 | 84  | 46  | 1 | 25 | 276 | 52  | 131 | 3.00E-18 | 73.9 |
| TcMYB44 | ATMYB119 | 42.47 | 73  | 42  | 0 | 25 | 243 | 138 | 210 | 3.00E-18 | 75.5 |
| TcMYB44 | ATMYB118 | 45.07 | 71  | 39  | 0 | 25 | 237 | 222 | 292 | 3.00E-18 | 75.5 |
| TcMYB44 | AtMYB98  | 41.03 | 78  | 46  | 0 | 25 | 258 | 250 | 327 | 4.00E-18 | 75.1 |
| TcMYB44 | AtMYB98  | 27.94 | 68  | 48  | 1 | 22 | 222 | 197 | 264 | 3.00E-05 | 36.6 |
| TcMYB44 | ATMYB110 | 43.66 | 71  | 40  | 0 | 25 | 237 | 100 | 170 | 2.00E-17 | 72   |
| TcMYB44 | AtMYB89  | 36.67 | 90  | 55  | 1 | 25 | 288 | 89  | 178 | 1.00E-16 | 68.6 |
| TcMYB44 | AtMYB22  | 29.29 | 140 | 89  | 2 | 25 | 414 | 86  | 225 | 3.00E-16 | 68.2 |
| TcMYB44 | AtMYB124 | 36.36 | 99  | 61  | 2 | 25 | 315 | 58  | 155 | 7.00E-15 | 65.5 |
| TcMYB44 | ATMYB88  | 41.33 | 75  | 44  | 1 | 25 | 249 | 63  | 136 | 5.00E-14 | 63.2 |

|         |           |       |     |    |   |    |     |     |     |          |      |
|---------|-----------|-------|-----|----|---|----|-----|-----|-----|----------|------|
| TcMYB45 | AtMYB70   | 58    | 150 | 33 | 2 | 22 | 381 | 7   | 156 | 2.00E-53 | 164  |
| TcMYB45 | ATMYB73   | 57.04 | 142 | 57 | 1 | 22 | 435 | 7   | 148 | 2.00E-52 | 162  |
| TcMYB45 | ATMYB44   | 76.92 | 91  | 21 | 0 | 31 | 303 | 3   | 93  | 5.00E-51 | 158  |
| TcMYB45 | ATMYB77   | 74.73 | 91  | 23 | 0 | 31 | 303 | 3   | 93  | 5.00E-50 | 155  |
| TcMYB45 | AtMYB109  | 65.56 | 90  | 31 | 0 | 34 | 303 | 54  | 143 | 4.00E-43 | 140  |
| TcMYB45 | AtMYB1    | 64.84 | 91  | 32 | 0 | 31 | 303 | 52  | 142 | 6.00E-41 | 134  |
| TcMYB45 | ATMYB25   | 57.29 | 96  | 41 | 0 | 16 | 303 | 42  | 137 | 1.00E-38 | 128  |
| TcMYB45 | ATMYB54   | 55.68 | 88  | 39 | 0 | 40 | 303 | 6   | 93  | 1.00E-36 | 119  |
| TcMYB45 | ATMYB52   | 42.86 | 133 | 71 | 2 | 40 | 423 | 5   | 137 | 2.00E-36 | 119  |
| TcMYB45 | ATMYB69   | 53.41 | 88  | 41 | 0 | 40 | 303 | 19  | 106 | 5.00E-35 | 115  |
| TcMYB45 | ATMYB105  | 56.82 | 88  | 38 | 0 | 40 | 303 | 107 | 194 | 7.00E-35 | 117  |
| TcMYB45 | AtMYB117  | 56.82 | 88  | 38 | 0 | 40 | 303 | 98  | 185 | 1.00E-34 | 117  |
| TcMYB45 | AtMYB56   | 56.82 | 88  | 38 | 0 | 40 | 303 | 93  | 180 | 3.00E-34 | 115  |
| TcMYB45 | ATMYB110  | 47.47 | 99  | 50 | 1 | 13 | 303 | 56  | 154 | 8.00E-31 | 106  |
| TcMYB45 | ATMYB121  | 55.06 | 89  | 39 | 1 | 40 | 303 | 29  | 117 | 1.00E-29 | 102  |
| TcMYB45 | AtMYB49   | 50    | 102 | 50 | 1 | 1  | 303 | 1   | 102 | 3.00E-28 | 99.8 |
| TcMYB45 | ATMYB92   | 51.69 | 89  | 42 | 1 | 40 | 303 | 14  | 102 | 5.00E-28 | 99.4 |
| TcMYB45 | ATMYB23   | 48.04 | 102 | 52 | 1 | 1  | 303 | 1   | 102 | 1.00E-27 | 95.9 |
| TcMYB45 | ATMYB23   | 31.37 | 51  | 35 | 1 | 40 | 192 | 67  | 116 | 4.00E-04 | 32   |
| TcMYB45 | ATMYB34   | 52.81 | 89  | 41 | 1 | 40 | 303 | 14  | 102 | 3.00E-27 | 96.7 |
| TcMYB45 | ATMYB14   | 51.69 | 89  | 42 | 1 | 40 | 303 | 14  | 102 | 4.00E-27 | 95.5 |
| TcMYB45 | AtMYB97   | 51.69 | 89  | 42 | 1 | 40 | 303 | 21  | 109 | 4.00E-27 | 97.8 |
| TcMYB45 | ATMYB80   | 51.69 | 89  | 42 | 1 | 40 | 303 | 14  | 102 | 5.00E-27 | 96.7 |
| TcMYB45 | AtMYB79   | 51.58 | 95  | 45 | 2 | 22 | 303 | 3   | 96  | 5.00E-27 | 95.5 |
| TcMYB45 | AtMYB51   | 52.81 | 89  | 41 | 1 | 40 | 303 | 15  | 103 | 5.00E-27 | 97.1 |
| TcMYB45 | AtMYB60   | 49.46 | 93  | 42 | 2 | 40 | 303 | 14  | 102 | 7.00E-27 | 95.5 |
| TcMYB45 | AtMYB98   | 44    | 100 | 56 | 0 | 4  | 303 | 205 | 304 | 2.00E-26 | 96.3 |
| TcMYB45 | AtMYB98   | 37.21 | 43  | 27 | 1 | 40 | 168 | 269 | 310 | 6.00E-05 | 34.7 |
| TcMYB45 | ATMYB13   | 48.96 | 96  | 47 | 2 | 22 | 303 | 8   | 102 | 2.00E-26 | 93.6 |
| TcMYB45 | ATMYB13   | 30.19 | 53  | 37 | 1 | 40 | 198 | 67  | 118 | 6.00E-04 | 31.6 |
| TcMYB45 | ATMYB118  | 46.39 | 97  | 52 | 0 | 13 | 303 | 180 | 276 | 2.00E-26 | 96.3 |
| TcMYB45 | ATMYB118  | 29.51 | 61  | 43 | 2 | 40 | 222 | 241 | 298 | 9.00E-04 | 31.2 |
| TcMYB45 | ATMYB66   | 51.69 | 89  | 42 | 1 | 40 | 303 | 18  | 106 | 2.00E-26 | 92.4 |
| TcMYB45 | ATMYB66   | 31.37 | 51  | 35 | 1 | 40 | 192 | 71  | 120 | 4.00E-04 | 32   |
| TcMYB45 | ATMYB63   | 50.56 | 89  | 43 | 1 | 40 | 303 | 16  | 104 | 2.00E-26 | 94.4 |
| TcMYB45 | ATMYB63   | 25.97 | 77  | 57 | 1 | 31 | 261 | 66  | 141 | 1.00E-04 | 33.5 |
| TcMYB45 | ATMYB48   | 47.37 | 95  | 49 | 2 | 22 | 303 | 4   | 97  | 2.00E-26 | 93.6 |
| TcMYB45 | ATMYB119  | 42.42 | 99  | 57 | 0 | 7  | 303 | 94  | 192 | 3.00E-26 | 95.9 |
| TcMYB45 | ATMYB119  | 37.21 | 43  | 27 | 1 | 40 | 168 | 157 | 198 | 7.00E-04 | 31.6 |
| TcMYB45 | AtMYB82   | 50.56 | 89  | 43 | 1 | 40 | 303 | 14  | 102 | 3.00E-26 | 92   |
| TcMYB45 | AtMYB82   | 31.48 | 54  | 37 | 1 | 40 | 201 | 67  | 119 | 7.00E-04 | 31.2 |
| TcMYB45 | ATMYB59-3 | 46.07 | 89  | 47 | 1 | 40 | 303 | 10  | 98  | 3.00E-26 | 92.8 |
| TcMYB45 | ATMYB59-3 | 23.08 | 65  | 48 | 2 | 40 | 228 | 63  | 126 | 5.00E-04 | 31.6 |
| TcMYB45 | AtMYB53   | 45.1  | 102 | 55 | 1 | 1  | 303 | 1   | 102 | 4.00E-26 | 94   |
| TcMYB45 | AtMYB107  | 50.56 | 89  | 43 | 1 | 40 | 303 | 14  | 102 | 5.00E-26 | 94   |
| TcMYB45 | ATMYB31   | 46.46 | 99  | 48 | 2 | 22 | 303 | 8   | 102 | 5.00E-26 | 94   |
| TcMYB45 | ATMYB35   | 52.81 | 89  | 41 | 1 | 40 | 303 | 14  | 102 | 6.00E-26 | 93.6 |
| TcMYB45 | AtMYB89   | 43.68 | 87  | 49 | 0 | 43 | 303 | 57  | 143 | 6.00E-26 | 90.9 |
| TcMYB45 | ATMYB46   | 52.81 | 89  | 41 | 1 | 40 | 303 | 20  | 108 | 7.00E-26 | 92.8 |
| TcMYB45 | ATMYB46   | 29.09 | 55  | 39 | 1 | 31 | 195 | 70  | 123 | 6.00E-04 | 31.6 |
| TcMYB45 | ATMYB106  | 51.69 | 89  | 42 | 1 | 40 | 303 | 57  | 145 | 7.00E-26 | 94.4 |
| TcMYB45 | AtMYB116  | 45.26 | 95  | 51 | 1 | 22 | 303 | 14  | 108 | 7.00E-26 | 92.8 |
| TcMYB45 | ATMYB71   | 49.44 | 89  | 44 | 1 | 40 | 303 | 20  | 108 | 8.00E-26 | 92.4 |
| TcMYB45 | AtMYB17   | 47.78 | 90  | 45 | 2 | 40 | 303 | 14  | 102 | 9.00E-26 | 92.8 |
| TcMYB45 | AtMYB41   | 50.56 | 89  | 43 | 1 | 40 | 303 | 14  | 102 | 1.00E-25 | 92.4 |
| TcMYB45 | ATMYB72   | 50    | 90  | 43 | 2 | 40 | 303 | 16  | 104 | 1.00E-25 | 92.4 |
| TcMYB45 | AtMYB64   | 43.82 | 89  | 50 | 0 | 37 | 303 | 104 | 192 | 1.00E-25 | 94   |
| TcMYB45 | AtMYB62   | 44    | 100 | 55 | 1 | 7  | 303 | 10  | 109 | 1.00E-25 | 92   |
| TcMYB45 | AtMYB93   | 48.31 | 89  | 45 | 1 | 40 | 303 | 14  | 102 | 2.00E-25 | 92.8 |
| TcMYB45 | ATMYB101  | 50.56 | 89  | 43 | 1 | 40 | 303 | 20  | 108 | 2.00E-25 | 93.6 |
| TcMYB45 | ATMYB16   | 50.56 | 89  | 43 | 1 | 40 | 303 | 14  | 102 | 3.00E-25 | 92   |
| TcMYB45 | AtMYB45   | 50.56 | 89  | 43 | 1 | 40 | 303 | 20  | 108 | 3.00E-25 | 90.9 |
| TcMYB45 | ATMYB95   | 49.44 | 89  | 44 | 1 | 40 | 303 | 14  | 102 | 3.00E-25 | 90.9 |
| TcMYB45 | ATMYB95   | 25.86 | 58  | 43 | 1 | 40 | 213 | 67  | 123 | 4.00E-04 | 32   |
| TcMYB45 | AtMYB74   | 50.56 | 89  | 43 | 1 | 40 | 303 | 15  | 103 | 4.00E-25 | 91.7 |
| TcMYB45 | ATMYB15   | 46.32 | 95  | 50 | 1 | 22 | 303 | 8   | 102 | 4.00E-25 | 90.9 |
| TcMYB45 | ATMYB15   | 31.67 | 60  | 40 | 2 | 40 | 216 | 67  | 125 | 6.00E-04 | 31.6 |
| TcMYB45 | ATMYB30   | 47.31 | 93  | 44 | 2 | 40 | 303 | 14  | 102 | 5.00E-25 | 91.3 |
| TcMYB45 | ATMYB122  | 49.44 | 89  | 44 | 1 | 40 | 303 | 14  | 102 | 5.00E-25 | 91.3 |
| TcMYB45 | ATMYB0    | 50.56 | 89  | 43 | 1 | 40 | 303 | 16  | 104 | 6.00E-25 | 89.4 |
| TcMYB45 | ATMYB0    | 33.33 | 51  | 34 | 1 | 40 | 192 | 69  | 118 | 2.00E-04 | 33.1 |
| TcMYB45 | ATMYB26   | 50    | 98  | 39 | 2 | 40 | 303 | 14  | 111 | 6.00E-25 | 91.7 |
| TcMYB45 | AtMYB9    | 50.56 | 89  | 43 | 1 | 40 | 303 | 14  | 102 | 6.00E-25 | 91.3 |
| TcMYB45 | ATMYB2    | 47.37 | 95  | 49 | 1 | 22 | 303 | 16  | 110 | 6.00E-25 | 90.1 |
| TcMYB45 | ATMYB102  | 50.56 | 89  | 43 | 1 | 40 | 303 | 14  | 102 | 7.00E-25 | 91.3 |
| TcMYB45 | ATMYB96   | 44.44 | 99  | 50 | 2 | 22 | 303 | 8   | 102 | 7.00E-25 | 91.3 |
| TcMYB45 | AtMYB47   | 47.19 | 89  | 46 | 1 | 40 | 303 | 14  | 102 | 8.00E-25 | 89.7 |
| TcMYB45 | AtMYB115  | 44.32 | 88  | 49 | 0 | 40 | 303 | 158 | 245 | 1.00E-24 | 90.5 |
| TcMYB45 | AtMYB115  | 32.86 | 70  | 47 | 2 | 40 | 249 | 210 | 276 | 5.00E-04 | 32   |
| TcMYB45 | ATMYB67   | 50.56 | 89  | 43 | 1 | 40 | 303 | 24  | 112 | 1.00E-24 | 89.7 |

|         |          |       |     |     |    |     |      |     |     |          |      |
|---------|----------|-------|-----|-----|----|-----|------|-----|-----|----------|------|
| TcMYB45 | ATMYB3   | 44.33 | 97  | 53  | 1  | 16  | 303  | 14  | 110 | 2.00E-24 | 88.2 |
| TcMYB45 | AtMYB27  | 46.67 | 90  | 46  | 2  | 40  | 303  | 11  | 99  | 2.00E-24 | 88.2 |
| TcMYB45 | ATMYB3   | 47.37 | 95  | 49  | 1  | 22  | 303  | 8   | 102 | 2.00E-24 | 88.6 |
| TcMYB45 | ATMYB94  | 46.24 | 93  | 45  | 2  | 40  | 303  | 14  | 102 | 2.00E-24 | 89.7 |
| TcMYB45 | MYB8     | 45.26 | 95  | 51  | 1  | 22  | 303  | 8   | 102 | 2.00E-24 | 87.4 |
| TcMYB45 | ATMYB4   | 48.42 | 95  | 48  | 1  | 22  | 303  | 8   | 102 | 3.00E-24 | 88.6 |
| TcMYB45 | AtMYB18  | 46.08 | 102 | 54  | 2  | 1   | 303  | 1   | 100 | 3.00E-24 | 88.6 |
| TcMYB45 | AtMYB24  | 46.07 | 89  | 47  | 1  | 40  | 303  | 19  | 107 | 3.00E-24 | 87   |
| TcMYB45 | AtMYB36  | 47.78 | 90  | 45  | 2  | 40  | 303  | 14  | 103 | 4.00E-24 | 89   |
| TcMYB45 | ATMYB38  | 50    | 90  | 43  | 2  | 40  | 303  | 14  | 103 | 5.00E-24 | 88.2 |
| TcMYB45 | AtMYB6   | 49.47 | 95  | 47  | 1  | 22  | 303  | 8   | 102 | 5.00E-24 | 87   |
| TcMYB45 | ATMYB120 | 48.31 | 89  | 45  | 1  | 40  | 303  | 28  | 116 | 6.00E-24 | 89.7 |
| TcMYB45 | ATMYB37  | 48.89 | 90  | 44  | 2  | 40  | 303  | 14  | 103 | 7.00E-24 | 88.2 |
| TcMYB45 | AtMYB103 | 50.56 | 89  | 43  | 1  | 40  | 303  | 14  | 102 | 8.00E-24 | 88.6 |
| TcMYB45 | ATMYB65  | 46.07 | 89  | 47  | 1  | 40  | 303  | 43  | 131 | 8.00E-24 | 89.4 |
| TcMYB45 | MYB7     | 49.44 | 89  | 44  | 1  | 40  | 303  | 14  | 102 | 1.00E-23 | 86.7 |
| TcMYB45 | ATMYB87  | 47.78 | 90  | 45  | 2  | 40  | 303  | 14  | 103 | 1.00E-23 | 87   |
| TcMYB45 | ATMYB57  | 47.19 | 89  | 46  | 1  | 40  | 303  | 27  | 115 | 2.00E-23 | 85.1 |
| TcMYB45 | AtMYB81  | 47.19 | 89  | 46  | 1  | 40  | 303  | 22  | 110 | 2.00E-23 | 88.2 |
| TcMYB45 | AtMYB32  | 51.69 | 89  | 42  | 1  | 40  | 303  | 14  | 102 | 2.00E-23 | 86.3 |
| TcMYB45 | AtMYB108 | 44.21 | 95  | 52  | 1  | 22  | 303  | 15  | 109 | 3.00E-23 | 86.7 |
| TcMYB45 | AtMYB112 | 42.55 | 94  | 53  | 1  | 25  | 303  | 29  | 122 | 3.00E-23 | 85.1 |
| TcMYB45 | AtMYB104 | 44.44 | 90  | 48  | 2  | 40  | 303  | 18  | 106 | 3.00E-23 | 87   |
| TcMYB45 | ATMYB58  | 48.31 | 89  | 45  | 1  | 40  | 303  | 16  | 104 | 4.00E-23 | 85.5 |
| TcMYB45 | ATMYB68  | 47.78 | 90  | 45  | 2  | 40  | 303  | 14  | 103 | 4.00E-23 | 86.7 |
| TcMYB45 | AtMYB83  | 50.56 | 89  | 43  | 1  | 40  | 303  | 32  | 120 | 4.00E-23 | 86.3 |
| TcMYB45 | ATMYB61  | 47.19 | 89  | 46  | 1  | 40  | 303  | 14  | 102 | 5.00E-23 | 86.3 |
| TcMYB45 | ATMYB61  | 26.39 | 72  | 53  | 1  | 31  | 246  | 64  | 134 | 1.00E-04 | 33.9 |
| TcMYB45 | AtMYB10  | 45.56 | 90  | 47  | 2  | 40  | 303  | 16  | 104 | 6.00E-23 | 84.3 |
| TcMYB45 | ATMYB86  | 48.31 | 89  | 45  | 1  | 40  | 303  | 14  | 102 | 6.00E-23 | 85.9 |
| TcMYB45 | ATMYB33  | 46.07 | 89  | 47  | 1  | 40  | 303  | 34  | 122 | 7.00E-23 | 86.7 |
| TcMYB45 | ATMYB84  | 46.67 | 90  | 46  | 2  | 40  | 303  | 14  | 103 | 8.00E-23 | 85.1 |
| TcMYB45 | AtMYB50  | 47.19 | 89  | 46  | 1  | 40  | 303  | 14  | 102 | 8.00E-23 | 85.1 |
| TcMYB45 | ATMYB11  | 46.32 | 95  | 50  | 1  | 22  | 303  | 8   | 102 | 1.00E-22 | 85.1 |
| TcMYB45 | ATMYB55  | 43.56 | 101 | 44  | 1  | 40  | 303  | 14  | 114 | 2.00E-22 | 84.7 |
| TcMYB45 | AtMYB19  | 44.55 | 101 | 52  | 3  | 13  | 303  | 3   | 102 | 2.00E-22 | 83.6 |
| TcMYB45 | ATMYB28  | 47.19 | 89  | 46  | 1  | 40  | 303  | 14  | 102 | 4.00E-22 | 84   |
| TcMYB45 | ATMYB29  | 47.19 | 89  | 46  | 1  | 40  | 303  | 14  | 102 | 4.00E-22 | 83.6 |
| TcMYB45 | ATMYB5   | 46.07 | 89  | 47  | 1  | 40  | 303  | 25  | 113 | 7.00E-22 | 81.6 |
| TcMYB45 | ATMYB5   | 29.2  | 113 | 68  | 6  | 43  | 345  | 80  | 189 | 7.00E-04 | 31.2 |
| TcMYB45 | ATMYB12  | 44.21 | 95  | 52  | 1  | 22  | 303  | 8   | 102 | 1.00E-21 | 82.8 |
| TcMYB45 | ATMYB12  | 28    | 75  | 51  | 2  | 31  | 246  | 64  | 137 | 8.00E-05 | 34.3 |
| TcMYB45 | AtMYB76  | 47.19 | 89  | 46  | 1  | 40  | 303  | 14  | 102 | 1.00E-21 | 82.4 |
| TcMYB45 | ATMYB111 | 45.26 | 95  | 51  | 1  | 22  | 303  | 8   | 102 | 1.00E-21 | 82.4 |
| TcMYB45 | ATMYB123 | 44.21 | 95  | 52  | 2  | 22  | 303  | 12  | 104 | 2.00E-21 | 80.5 |
| TcMYB45 | ATMYB91  | 45.35 | 86  | 44  | 1  | 49  | 297  | 7   | 92  | 5.00E-21 | 80.9 |
| TcMYB45 | AtMYB40  | 44.44 | 90  | 48  | 2  | 40  | 303  | 14  | 102 | 9.00E-21 | 79   |
| TcMYB45 | AtMYB114 | 41.57 | 89  | 51  | 1  | 40  | 303  | 10  | 98  | 1.00E-20 | 75.9 |
| TcMYB45 | AtMYB114 | 34.62 | 52  | 34  | 1  | 40  | 195  | 63  | 113 | 0.001    | 30.4 |
| TcMYB45 | AtMYB100 | 37.23 | 94  | 58  | 3  | 25  | 303  | 23  | 113 | 3.00E-20 | 77   |
| TcMYB45 | ATMYB88  | 38.82 | 85  | 52  | 0  | 49  | 303  | 33  | 117 | 5.00E-20 | 78.6 |
| TcMYB45 | ATMYB88  | 30.16 | 63  | 44  | 1  | 40  | 228  | 82  | 143 | 6.00E-06 | 37.7 |
| TcMYB45 | ATMYB78  | 37.5  | 112 | 55  | 2  | 13  | 303  | 19  | 130 | 8.00E-20 | 77   |
| TcMYB45 | AtMYB42  | 43.82 | 89  | 49  | 1  | 40  | 303  | 14  | 102 | 3.00E-19 | 75.1 |
| TcMYB45 | ATMYB75  | 40.45 | 89  | 52  | 1  | 40  | 303  | 10  | 98  | 5.00E-19 | 73.9 |
| TcMYB45 | AtMYB20  | 41.67 | 96  | 54  | 2  | 22  | 303  | 8   | 102 | 6.00E-19 | 74.3 |
| TcMYB45 | AtMYB124 | 36.47 | 85  | 54  | 0  | 49  | 303  | 28  | 112 | 7.00E-19 | 75.1 |
| TcMYB45 | AtMYB124 | 30.56 | 72  | 50  | 1  | 40  | 255  | 77  | 147 | 1.00E-06 | 39.7 |
| TcMYB45 | AtMYB85  | 43.82 | 89  | 49  | 1  | 40  | 303  | 14  | 102 | 1.00E-18 | 73.2 |
| TcMYB45 | ATMYB90  | 40.45 | 89  | 52  | 1  | 40  | 303  | 10  | 98  | 2.00E-18 | 72.4 |
| TcMYB45 | AtMYB113 | 39.78 | 93  | 51  | 2  | 40  | 303  | 10  | 98  | 3.00E-18 | 72   |
| TcMYB45 | AtMYB43  | 40.62 | 96  | 55  | 2  | 22  | 303  | 8   | 102 | 4.00E-18 | 72.4 |
| TcMYB45 | ATMYB99  | 41.18 | 102 | 52  | 2  | 22  | 303  | 9   | 110 | 1.00E-17 | 70.1 |
| TcMYB45 | AtMYB22  | 35.16 | 91  | 59  | 1  | 31  | 303  | 51  | 140 | 1.00E-15 | 65.1 |
| TcMYB45 | AtMYB22  | 35.19 | 54  | 35  | 2  | 40  | 201  | 105 | 156 | 6.00E-04 | 31.6 |
| TcMYB46 | ATMYB33  | 36.3  | 595 | 361 | 19 | 43  | 1773 | 4   | 519 | 2.00E-93 | 290  |
| TcMYB46 | ATMYB65  | 36.46 | 565 | 340 | 18 | 118 | 1755 | 41  | 550 | 1.00E-86 | 273  |
| TcMYB46 | ATMYB101 | 33.79 | 580 | 350 | 17 | 118 | 1755 | 18  | 489 | 3.00E-77 | 246  |
| TcMYB46 | ATMYB120 | 65.22 | 161 | 56  | 0  | 67  | 549  | 9   | 169 | 3.00E-68 | 223  |
| TcMYB46 | AtMYB81  | 55.91 | 186 | 78  | 3  | 91  | 636  | 7   | 188 | 2.00E-65 | 213  |
| TcMYB46 | AtMYB97  | 71.32 | 136 | 39  | 1  | 91  | 498  | 10  | 142 | 9.00E-65 | 210  |
| TcMYB46 | ATMYB5   | 41.75 | 194 | 106 | 4  | 118 | 678  | 23  | 209 | 5.00E-48 | 161  |
| TcMYB46 | AtMYB17  | 65.38 | 104 | 36  | 0  | 118 | 429  | 12  | 115 | 2.00E-47 | 161  |
| TcMYB46 | ATMYB15  | 40.09 | 222 | 132 | 5  | 118 | 780  | 12  | 215 | 4.00E-47 | 160  |
| TcMYB46 | ATMYB102 | 65.38 | 104 | 36  | 0  | 118 | 429  | 12  | 115 | 4.00E-47 | 162  |
| TcMYB46 | AtMYB107 | 65.38 | 104 | 36  | 0  | 118 | 429  | 12  | 115 | 5.00E-47 | 160  |
| TcMYB46 | AtMYB74  | 47.19 | 178 | 90  | 4  | 118 | 639  | 13  | 187 | 5.00E-47 | 160  |
| TcMYB46 | ATMYB66  | 43.68 | 174 | 89  | 1  | 79  | 573  | 3   | 176 | 7.00E-47 | 156  |
| TcMYB46 | ATMYB3   | 63.46 | 104 | 38  | 0  | 118 | 429  | 12  | 115 | 9.00E-47 | 158  |
| TcMYB46 | ATMYB96  | 35.86 | 290 | 144 | 6  | 118 | 861  | 12  | 301 | 1.00E-46 | 160  |

|         |           |       |     |     |   |     |     |    |     |          |     |
|---------|-----------|-------|-----|-----|---|-----|-----|----|-----|----------|-----|
| TcMYB46 | AtMYB41   | 61.54 | 104 | 40  | 0 | 118 | 429 | 12 | 115 | 1.00E-46 | 158 |
| TcMYB46 | AtMYB9    | 62.62 | 107 | 40  | 0 | 118 | 438 | 12 | 118 | 4.00E-46 | 159 |
| TcMYB46 | AtMYB6    | 65.69 | 102 | 35  | 0 | 124 | 429 | 14 | 115 | 5.00E-46 | 155 |
| TcMYB46 | MYB8      | 62.5  | 104 | 39  | 0 | 118 | 429 | 12 | 115 | 9.00E-46 | 154 |
| TcMYB46 | ATMYB14   | 59.63 | 109 | 44  | 0 | 118 | 444 | 12 | 120 | 1.00E-45 | 154 |
| TcMYB46 | AtMYB79   | 62.86 | 105 | 39  | 0 | 121 | 435 | 7  | 111 | 2.00E-45 | 154 |
| TcMYB46 | ATMYB57   | 60.19 | 108 | 43  | 0 | 112 | 435 | 23 | 130 | 2.00E-45 | 152 |
| TcMYB46 | MYB7      | 63.46 | 104 | 38  | 0 | 118 | 429 | 12 | 115 | 2.00E-45 | 154 |
| TcMYB46 | AtMYB32   | 47.34 | 169 | 88  | 3 | 124 | 627 | 14 | 162 | 3.00E-45 | 154 |
| TcMYB46 | ATMYB106  | 51.8  | 139 | 66  | 2 | 118 | 531 | 55 | 190 | 8.00E-45 | 156 |
| TcMYB46 | ATMYB71   | 44.32 | 176 | 92  | 2 | 121 | 630 | 19 | 194 | 8.00E-45 | 153 |
| TcMYB46 | ATMYB4    | 64.71 | 102 | 36  | 0 | 124 | 429 | 14 | 115 | 1.00E-44 | 153 |
| TcMYB46 | ATMYB3    | 54.4  | 125 | 52  | 1 | 79  | 438 | 2  | 126 | 1.00E-44 | 151 |
| TcMYB46 | ATMYB92   | 63.46 | 104 | 38  | 0 | 118 | 429 | 12 | 115 | 2.00E-44 | 154 |
| TcMYB46 | ATMYB13   | 47.47 | 158 | 83  | 3 | 118 | 591 | 12 | 154 | 2.00E-44 | 151 |
| TcMYB46 | ATMYB28   | 49.68 | 155 | 77  | 3 | 103 | 564 | 8  | 158 | 2.00E-44 | 155 |
| TcMYB46 | AtMYB53   | 61.54 | 104 | 40  | 0 | 118 | 429 | 12 | 115 | 2.00E-44 | 153 |
| TcMYB46 | ATMYB29   | 45.18 | 197 | 104 | 7 | 103 | 681 | 8  | 192 | 3.00E-44 | 153 |
| TcMYB46 | AtMYB24   | 54.31 | 116 | 53  | 0 | 79  | 426 | 4  | 119 | 3.00E-44 | 149 |
| TcMYB46 | AtMYB51   | 54.07 | 135 | 60  | 2 | 118 | 516 | 13 | 147 | 3.00E-44 | 154 |
| TcMYB46 | ATMYB121  | 38.89 | 234 | 132 | 5 | 121 | 789 | 28 | 240 | 4.00E-44 | 151 |
| TcMYB46 | ATMYB63   | 43.72 | 183 | 94  | 4 | 118 | 639 | 14 | 194 | 4.00E-44 | 152 |
| TcMYB46 | ATMYB16   | 60.58 | 104 | 41  | 0 | 118 | 429 | 12 | 115 | 5.00E-44 | 152 |
| TcMYB46 | AtMYB49   | 55.56 | 126 | 53  | 2 | 118 | 486 | 12 | 137 | 6.00E-44 | 152 |
| TcMYB46 | ATMYB30   | 60.38 | 106 | 42  | 0 | 112 | 429 | 10 | 115 | 6.00E-44 | 152 |
| TcMYB46 | AtMYB76   | 47.68 | 151 | 64  | 2 | 103 | 510 | 8  | 157 | 6.00E-44 | 152 |
| TcMYB46 | AtMYB50   | 48.59 | 142 | 70  | 2 | 118 | 534 | 12 | 153 | 1.00E-43 | 151 |
| TcMYB46 | AtMYB60   | 61.54 | 104 | 40  | 0 | 118 | 429 | 12 | 115 | 1.00E-43 | 150 |
| TcMYB46 | ATMYB94   | 58.88 | 107 | 44  | 0 | 118 | 438 | 12 | 118 | 2.00E-43 | 151 |
| TcMYB46 | ATMYB58   | 41.34 | 179 | 105 | 2 | 118 | 654 | 14 | 184 | 2.00E-43 | 149 |
| TcMYB46 | AtMYB93   | 61.54 | 104 | 40  | 0 | 118 | 429 | 12 | 115 | 2.00E-43 | 152 |
| TcMYB46 | ATMYB86   | 54.33 | 127 | 57  | 2 | 118 | 495 | 12 | 135 | 4.00E-43 | 150 |
| TcMYB46 | ATMYB31   | 60.58 | 104 | 41  | 0 | 118 | 429 | 12 | 115 | 1.00E-42 | 149 |
| TcMYB46 | ATMYB34   | 59.81 | 107 | 43  | 0 | 118 | 438 | 12 | 118 | 1.00E-42 | 148 |
| TcMYB46 | ATMYB23   | 57.28 | 103 | 44  | 0 | 121 | 429 | 13 | 115 | 1.00E-42 | 145 |
| TcMYB46 | ATMYB99   | 52.55 | 137 | 54  | 4 | 118 | 495 | 13 | 146 | 1.00E-42 | 146 |
| TcMYB46 | AtMYB20   | 53.17 | 126 | 57  | 2 | 118 | 489 | 12 | 137 | 2.00E-42 | 147 |
| TcMYB46 | AtMYB116  | 50.83 | 120 | 59  | 1 | 79  | 438 | 6  | 124 | 3.00E-42 | 146 |
| TcMYB46 | AtMYB43   | 52.99 | 134 | 61  | 2 | 118 | 513 | 12 | 145 | 3.00E-42 | 147 |
| TcMYB46 | AtMYB85   | 50    | 140 | 68  | 3 | 118 | 531 | 12 | 150 | 4.00E-42 | 145 |
| TcMYB46 | ATMYB87   | 58.49 | 106 | 43  | 1 | 115 | 429 | 11 | 116 | 5.00E-42 | 146 |
| TcMYB46 | ATMYB46   | 57.01 | 107 | 46  | 0 | 118 | 438 | 18 | 124 | 5.00E-42 | 145 |
| TcMYB46 | AtMYB62   | 51.64 | 122 | 59  | 1 | 73  | 438 | 6  | 125 | 6.00E-42 | 145 |
| TcMYB46 | ATMYB61   | 58.88 | 107 | 44  | 0 | 118 | 438 | 12 | 118 | 8.00E-42 | 147 |
| TcMYB46 | ATMYB80   | 56.19 | 105 | 46  | 0 | 115 | 429 | 11 | 115 | 1.00E-41 | 145 |
| TcMYB46 | ATMYB67   | 49.28 | 138 | 69  | 2 | 106 | 516 | 18 | 152 | 1.00E-41 | 145 |
| TcMYB46 | AtMYB82   | 52.14 | 117 | 53  | 1 | 106 | 447 | 8  | 124 | 2.00E-41 | 142 |
| TcMYB46 | AtMYB42   | 58.65 | 104 | 43  | 0 | 118 | 429 | 12 | 115 | 2.00E-41 | 144 |
| TcMYB46 | ATMYB111  | 57.69 | 104 | 44  | 0 | 118 | 429 | 12 | 115 | 2.00E-41 | 145 |
| TcMYB46 | ATMYB0    | 57.28 | 103 | 44  | 0 | 121 | 429 | 15 | 117 | 2.00E-41 | 142 |
| TcMYB46 | ATMYB72   | 40    | 190 | 102 | 4 | 118 | 651 | 14 | 199 | 4.00E-41 | 144 |
| TcMYB46 | AtMYB83   | 42.24 | 161 | 90  | 2 | 94  | 567 | 22 | 169 | 4.00E-41 | 145 |
| TcMYB46 | ATMYB95   | 57.69 | 104 | 44  | 0 | 118 | 429 | 12 | 115 | 5.00E-41 | 142 |
| TcMYB46 | AtMYB112  | 52.83 | 106 | 50  | 0 | 118 | 435 | 32 | 137 | 7.00E-41 | 141 |
| TcMYB46 | ATMYB122  | 45.96 | 161 | 73  | 3 | 118 | 558 | 12 | 172 | 9.00E-41 | 144 |
| TcMYB46 | AtMYB108  | 54.21 | 107 | 49  | 0 | 118 | 438 | 19 | 125 | 1.00E-40 | 143 |
| TcMYB46 | ATMYB12   | 55.77 | 104 | 46  | 0 | 118 | 429 | 12 | 115 | 1.00E-40 | 144 |
| TcMYB46 | ATMYB59-3 | 54.87 | 113 | 50  | 1 | 121 | 456 | 9  | 121 | 1.00E-40 | 140 |
| TcMYB46 | ATMYB2    | 54.72 | 106 | 48  | 0 | 118 | 435 | 20 | 125 | 2.00E-40 | 141 |
| TcMYB46 | AtMYB36   | 47.22 | 144 | 71  | 3 | 115 | 531 | 11 | 146 | 2.00E-40 | 142 |
| TcMYB46 | ATMYB123  | 54.81 | 104 | 47  | 0 | 118 | 429 | 14 | 117 | 3.00E-40 | 140 |
| TcMYB46 | ATMYB68   | 32.31 | 294 | 175 | 7 | 115 | 924 | 11 | 295 | 3.00E-40 | 143 |
| TcMYB46 | ATMYB35   | 54.29 | 105 | 48  | 0 | 115 | 429 | 11 | 115 | 3.00E-40 | 142 |
| TcMYB46 | ATMYB48   | 46.48 | 142 | 75  | 2 | 121 | 543 | 8  | 147 | 3.00E-40 | 140 |
| TcMYB46 | ATMYB11   | 54.81 | 104 | 47  | 0 | 118 | 429 | 12 | 115 | 4.00E-40 | 142 |
| TcMYB46 | ATMYB55   | 55.08 | 118 | 41  | 1 | 118 | 435 | 12 | 129 | 9.00E-40 | 141 |
| TcMYB46 | ATMYB84   | 58.49 | 106 | 43  | 1 | 115 | 429 | 11 | 116 | 1.00E-39 | 140 |
| TcMYB46 | AtMYB40   | 48.15 | 135 | 67  | 2 | 118 | 513 | 12 | 146 | 1.00E-39 | 139 |
| TcMYB46 | AtMYB10   | 56.73 | 104 | 45  | 0 | 118 | 429 | 14 | 117 | 1.00E-39 | 138 |
| TcMYB46 | AtMYB103  | 55.14 | 107 | 48  | 0 | 118 | 438 | 12 | 118 | 2.00E-39 | 141 |
| TcMYB46 | AtMYB47   | 40.7  | 172 | 99  | 3 | 118 | 624 | 12 | 180 | 8.00E-39 | 136 |
| TcMYB46 | ATMYB26   | 52.21 | 113 | 45  | 1 | 118 | 429 | 12 | 124 | 2.00E-38 | 138 |
| TcMYB46 | ATMYB38   | 48.12 | 133 | 68  | 2 | 115 | 510 | 11 | 142 | 2.00E-38 | 136 |
| TcMYB46 | AtMYB114  | 48.6  | 107 | 55  | 0 | 109 | 429 | 5  | 111 | 2.00E-38 | 131 |
| TcMYB46 | AtMYB104  | 52.99 | 117 | 55  | 0 | 124 | 474 | 18 | 134 | 2.00E-38 | 138 |
| TcMYB46 | AtMYB45   | 37.69 | 199 | 115 | 4 | 121 | 690 | 19 | 205 | 9.00E-38 | 133 |
| TcMYB46 | ATMYB37   | 37.25 | 204 | 125 | 5 | 118 | 720 | 12 | 190 | 9.00E-38 | 135 |
| TcMYB46 | AtMYB27   | 53.77 | 106 | 49  | 0 | 115 | 432 | 8  | 113 | 1.00E-36 | 129 |
| TcMYB46 | ATMYB75   | 47.66 | 107 | 56  | 0 | 109 | 429 | 5  | 111 | 2.00E-36 | 129 |
| TcMYB46 | ATMYB78   | 46.28 | 121 | 51  | 1 | 118 | 438 | 26 | 146 | 5.00E-36 | 130 |

|         |           |       |     |     |   |     |     |     |     |          |      |
|---------|-----------|-------|-----|-----|---|-----|-----|-----|-----|----------|------|
| TcMYB46 | AtMYB113  | 48.08 | 104 | 54  | 0 | 118 | 429 | 8   | 111 | 1.00E-35 | 127  |
| TcMYB46 | AtMYB19   | 52.29 | 109 | 52  | 0 | 121 | 447 | 13  | 121 | 1.00E-35 | 127  |
| TcMYB46 | ATMYB90   | 47.66 | 107 | 56  | 0 | 109 | 429 | 5   | 111 | 3.00E-35 | 126  |
| TcMYB46 | AtMYB18   | 50.49 | 103 | 51  | 0 | 121 | 429 | 11  | 113 | 9.00E-33 | 120  |
| TcMYB46 | AtMYB98   | 45.93 | 135 | 72  | 4 | 31  | 432 | 195 | 317 | 1.00E-31 | 120  |
| TcMYB46 | AtMYB1    | 44.97 | 149 | 69  | 3 | 22  | 429 | 9   | 155 | 1.00E-31 | 119  |
| TcMYB46 | AtMYB70   | 53.92 | 102 | 47  | 1 | 124 | 429 | 13  | 113 | 4.00E-31 | 116  |
| TcMYB46 | ATMYB119  | 50.46 | 109 | 53  | 3 | 109 | 432 | 100 | 205 | 1.00E-30 | 117  |
| TcMYB46 | ATMYB73   | 51.96 | 102 | 49  | 1 | 124 | 429 | 13  | 113 | 1.00E-30 | 115  |
| TcMYB46 | ATMYB118  | 44.53 | 137 | 76  | 2 | 115 | 525 | 186 | 320 | 2.00E-30 | 116  |
| TcMYB46 | AtMYB109  | 50.44 | 113 | 55  | 2 | 94  | 429 | 46  | 156 | 6.00E-30 | 114  |
| TcMYB46 | AtMYB115  | 43.48 | 138 | 76  | 4 | 19  | 426 | 129 | 257 | 8.00E-30 | 113  |
| TcMYB46 | AtMYB64   | 50    | 104 | 51  | 3 | 124 | 432 | 105 | 205 | 3.00E-29 | 112  |
| TcMYB46 | ATMYB77   | 47.66 | 107 | 56  | 1 | 124 | 444 | 6   | 111 | 2.00E-28 | 108  |
| TcMYB46 | ATMYB44   | 50    | 102 | 51  | 1 | 124 | 429 | 6   | 106 | 2.00E-28 | 108  |
| TcMYB46 | AtMYB100  | 49.07 | 108 | 54  | 2 | 118 | 438 | 24  | 129 | 3.00E-28 | 105  |
| TcMYB46 | ATMYB25   | 49.54 | 109 | 54  | 2 | 106 | 429 | 44  | 150 | 4.00E-28 | 108  |
| TcMYB46 | AtMYB117  | 41.73 | 139 | 75  | 3 | 55  | 453 | 70  | 206 | 1.00E-27 | 107  |
| TcMYB46 | ATMYB105  | 45.22 | 115 | 62  | 2 | 97  | 438 | 98  | 210 | 1.00E-27 | 106  |
| TcMYB46 | AtMYB56   | 48.57 | 105 | 54  | 1 | 124 | 438 | 93  | 196 | 1.00E-27 | 106  |
| TcMYB46 | ATMYB52   | 46.96 | 115 | 60  | 2 | 124 | 465 | 5   | 117 | 1.00E-27 | 104  |
| TcMYB46 | ATMYB69   | 45.87 | 109 | 58  | 2 | 115 | 438 | 16  | 122 | 2.00E-27 | 103  |
| TcMYB46 | ATMYB54   | 46.23 | 106 | 56  | 2 | 124 | 438 | 6   | 109 | 2.00E-26 | 100  |
| TcMYB46 | ATMYB110  | 42.19 | 128 | 74  | 2 | 55  | 438 | 48  | 170 | 5.00E-26 | 101  |
| TcMYB46 | AtMYB22   | 40.3  | 134 | 80  | 3 | 37  | 438 | 30  | 156 | 4.00E-25 | 97.4 |
| TcMYB46 | ATMYB91   | 40.38 | 104 | 60  | 1 | 133 | 438 | 7   | 110 | 2.00E-23 | 94.7 |
| TcMYB46 | AtMYB89   | 36.09 | 133 | 82  | 3 | 127 | 516 | 57  | 178 | 3.00E-19 | 78.6 |
| TcMYB46 | AtMYB124  | 34.65 | 101 | 66  | 1 | 133 | 435 | 28  | 127 | 4.00E-17 | 76.3 |
| TcMYB46 | ATMYB88   | 31.68 | 101 | 69  | 1 | 133 | 435 | 33  | 132 | 4.00E-15 | 70.1 |
| TcMYB47 | AtMYB79   | 53.11 | 177 | 73  | 2 | 28  | 528 | 7   | 181 | 7.00E-62 | 188  |
| TcMYB47 | ATMYB3    | 65.57 | 122 | 42  | 0 | 16  | 381 | 17  | 138 | 2.00E-61 | 186  |
| TcMYB47 | ATMYB71   | 79.61 | 103 | 21  | 0 | 28  | 336 | 19  | 121 | 7.00E-61 | 186  |
| TcMYB47 | AtMYB62   | 60.9  | 133 | 47  | 1 | 7   | 390 | 13  | 145 | 2.00E-60 | 186  |
| TcMYB47 | AtMYB112  | 63.91 | 133 | 43  | 2 | 7   | 390 | 26  | 158 | 2.00E-59 | 182  |
| TcMYB47 | AtMYB24   | 74.04 | 104 | 27  | 0 | 22  | 333 | 16  | 119 | 2.00E-59 | 181  |
| TcMYB47 | AtMYB116  | 42.67 | 232 | 121 | 5 | 10  | 669 | 13  | 243 | 2.00E-59 | 182  |
| TcMYB47 | ATMYB57   | 62.5  | 128 | 45  | 2 | 7   | 381 | 19  | 146 | 2.00E-57 | 175  |
| TcMYB47 | ATMYB2    | 56.39 | 133 | 52  | 2 | 10  | 390 | 15  | 146 | 3.00E-57 | 177  |
| TcMYB47 | ATMYB121  | 56.05 | 157 | 60  | 3 | 1   | 444 | 17  | 172 | 4.00E-57 | 177  |
| TcMYB47 | ATMYB59-3 | 64.04 | 114 | 41  | 0 | 7   | 348 | 2   | 115 | 7.00E-56 | 172  |
| TcMYB47 | AtMYB108  | 68.52 | 108 | 34  | 0 | 10  | 333 | 14  | 121 | 7.00E-56 | 175  |
| TcMYB47 | ATMYB48   | 62.4  | 125 | 46  | 2 | 10  | 381 | 3   | 126 | 3.00E-55 | 171  |
| TcMYB47 | ATMYB78   | 64.75 | 122 | 29  | 1 | 10  | 333 | 21  | 142 | 2.00E-54 | 171  |
| TcMYB47 | ATMYB3    | 48.62 | 181 | 80  | 2 | 13  | 516 | 8   | 188 | 2.00E-54 | 169  |
| TcMYB47 | ATMYB66   | 48.24 | 170 | 84  | 3 | 19  | 516 | 14  | 176 | 2.00E-52 | 162  |
| TcMYB47 | AtMYB27   | 41.13 | 231 | 122 | 6 | 4   | 654 | 3   | 231 | 1.00E-51 | 161  |
| TcMYB47 | MYB8      | 64.04 | 114 | 41  | 0 | 13  | 354 | 8   | 121 | 5.00E-51 | 159  |
| TcMYB47 | ATMYB13   | 63.79 | 116 | 39  | 1 | 13  | 351 | 8   | 123 | 6.00E-51 | 160  |
| TcMYB47 | MYB7      | 64.91 | 114 | 40  | 0 | 13  | 354 | 8   | 121 | 2.00E-50 | 159  |
| TcMYB47 | ATMYB4    | 65.79 | 114 | 39  | 0 | 13  | 354 | 8   | 121 | 2.00E-50 | 159  |
| TcMYB47 | ATMYB14   | 64.22 | 109 | 39  | 0 | 13  | 339 | 8   | 116 | 4.00E-50 | 158  |
| TcMYB47 | ATMYB23   | 62.39 | 109 | 41  | 0 | 13  | 339 | 8   | 116 | 6.00E-50 | 156  |
| TcMYB47 | AtMYB6    | 63.25 | 117 | 43  | 0 | 13  | 363 | 8   | 124 | 7.00E-50 | 157  |
| TcMYB47 | AtMYB49   | 66.97 | 109 | 36  | 0 | 13  | 339 | 8   | 116 | 9.00E-50 | 159  |
| TcMYB47 | AtMYB32   | 66.97 | 109 | 36  | 0 | 13  | 339 | 8   | 116 | 1.00E-49 | 157  |
| TcMYB47 | AtMYB107  | 65.14 | 109 | 38  | 0 | 13  | 339 | 8   | 116 | 4.00E-49 | 157  |
| TcMYB47 | AtMYB9    | 65.14 | 109 | 38  | 0 | 13  | 339 | 8   | 116 | 1.00E-48 | 157  |
| TcMYB47 | AtMYB85   | 65.71 | 105 | 36  | 0 | 25  | 339 | 12  | 116 | 2.00E-48 | 154  |
| TcMYB47 | ATMYB86   | 43.63 | 204 | 111 | 5 | 16  | 615 | 9   | 200 | 2.00E-48 | 156  |
| TcMYB47 | AtMYB74   | 63.64 | 110 | 40  | 0 | 10  | 339 | 8   | 117 | 2.00E-48 | 155  |
| TcMYB47 | ATMYB12   | 63.96 | 111 | 40  | 0 | 13  | 345 | 8   | 118 | 3.00E-48 | 156  |
| TcMYB47 | AtMYB41   | 63.3  | 109 | 40  | 0 | 13  | 339 | 8   | 116 | 4.00E-48 | 154  |
| TcMYB47 | ATMYB5    | 65.71 | 105 | 36  | 0 | 25  | 339 | 23  | 127 | 7.00E-48 | 152  |
| TcMYB47 | AtMYB42   | 65.71 | 105 | 36  | 0 | 25  | 339 | 12  | 116 | 9.00E-48 | 153  |
| TcMYB47 | ATMYB102  | 64.22 | 109 | 39  | 0 | 13  | 339 | 8   | 116 | 2.00E-47 | 154  |
| TcMYB47 | ATMYB0    | 58.56 | 111 | 46  | 0 | 7   | 339 | 8   | 118 | 2.00E-47 | 150  |
| TcMYB47 | ATMYB61   | 61.54 | 117 | 45  | 1 | 4   | 354 | 8   | 121 | 2.00E-47 | 154  |
| TcMYB47 | ATMYB11   | 65.14 | 109 | 38  | 0 | 13  | 339 | 8   | 116 | 4.00E-47 | 153  |
| TcMYB47 | AtMYB20   | 63.21 | 106 | 39  | 0 | 25  | 342 | 12  | 117 | 4.00E-47 | 151  |
| TcMYB47 | AtMYB51   | 65.71 | 105 | 36  | 0 | 25  | 339 | 13  | 117 | 1.00E-46 | 152  |
| TcMYB47 | AtMYB51   | 30.16 | 63  | 43  | 3 | 22  | 207 | 65  | 124 | 8.00E-04 | 32.3 |
| TcMYB47 | ATMYB15   | 59.46 | 111 | 45  | 0 | 13  | 345 | 8   | 118 | 1.00E-46 | 150  |
| TcMYB47 | AtMYB50   | 59.83 | 117 | 47  | 1 | 4   | 354 | 8   | 121 | 1.00E-46 | 150  |
| TcMYB47 | ATMYB92   | 58.72 | 109 | 45  | 0 | 13  | 339 | 8   | 116 | 2.00E-46 | 151  |
| TcMYB47 | ATMYB46   | 48.43 | 159 | 82  | 1 | 22  | 498 | 17  | 169 | 2.00E-46 | 149  |
| TcMYB47 | ATMYB34   | 58.77 | 114 | 47  | 0 | 13  | 354 | 8   | 121 | 2.00E-46 | 150  |
| TcMYB47 | ATMYB101  | 59.26 | 108 | 44  | 0 | 13  | 336 | 14  | 121 | 2.00E-46 | 154  |
| TcMYB47 | AtMYB82   | 54.03 | 124 | 55  | 1 | 7   | 372 | 4   | 127 | 4.00E-46 | 146  |
| TcMYB47 | ATMYB123  | 62.26 | 106 | 40  | 0 | 22  | 339 | 13  | 118 | 1.00E-45 | 147  |
| TcMYB47 | AtMYB83   | 56.45 | 124 | 54  | 1 | 22  | 393 | 29  | 149 | 1.00E-45 | 149  |

|         |          |       |     |     |    |     |      |     |     |          |      |
|---------|----------|-------|-----|-----|----|-----|------|-----|-----|----------|------|
| TcMYB47 | ATMYB106 | 64.76 | 105 | 37  | 0  | 25  | 339  | 55  | 159 | 2.00E-45 | 149  |
| TcMYB47 | AtMYB97  | 62.14 | 103 | 39  | 0  | 25  | 333  | 19  | 121 | 3.00E-45 | 149  |
| TcMYB47 | AtMYB43  | 61.32 | 106 | 41  | 0  | 25  | 342  | 12  | 117 | 3.00E-45 | 147  |
| TcMYB47 | AtMYB93  | 61.47 | 109 | 42  | 0  | 13  | 339  | 8   | 116 | 5.00E-45 | 148  |
| TcMYB47 | AtMYB76  | 55.2  | 125 | 55  | 1  | 25  | 396  | 12  | 136 | 5.00E-45 | 147  |
| TcMYB47 | ATMYB111 | 61.47 | 109 | 42  | 0  | 13  | 339  | 8   | 116 | 6.00E-45 | 147  |
| TcMYB47 | ATMYB67  | 48.15 | 135 | 69  | 1  | 16  | 417  | 19  | 153 | 7.00E-45 | 146  |
| TcMYB47 | AtMYB103 | 53.17 | 126 | 59  | 1  | 16  | 393  | 9   | 129 | 7.00E-45 | 147  |
| TcMYB47 | AtMYB53  | 59.63 | 109 | 44  | 0  | 13  | 339  | 8   | 116 | 8.00E-45 | 146  |
| TcMYB47 | ATMYB16  | 63.81 | 105 | 38  | 0  | 25  | 339  | 12  | 116 | 8.00E-45 | 146  |
| TcMYB47 | AtMYB10  | 46.1  | 154 | 83  | 1  | 13  | 474  | 10  | 161 | 1.00E-44 | 144  |
| TcMYB47 | ATMYB29  | 60    | 110 | 44  | 0  | 25  | 354  | 12  | 121 | 1.00E-44 | 146  |
| TcMYB47 | ATMYB63  | 58.72 | 109 | 45  | 0  | 13  | 339  | 10  | 118 | 1.00E-44 | 145  |
| TcMYB47 | ATMYB31  | 60.55 | 109 | 43  | 0  | 13  | 339  | 8   | 116 | 2.00E-44 | 145  |
| TcMYB47 | ATMYB35  | 56.88 | 109 | 47  | 0  | 13  | 339  | 8   | 116 | 2.00E-44 | 145  |
| TcMYB47 | AtMYB17  | 59.09 | 110 | 45  | 0  | 25  | 354  | 12  | 121 | 2.00E-44 | 144  |
| TcMYB47 | ATMYB94  | 58.72 | 109 | 45  | 0  | 25  | 351  | 12  | 120 | 3.00E-44 | 145  |
| TcMYB47 | ATMYB28  | 58.18 | 110 | 46  | 0  | 25  | 354  | 12  | 121 | 3.00E-44 | 146  |
| TcMYB47 | ATMYB95  | 58.18 | 110 | 46  | 0  | 25  | 354  | 12  | 121 | 3.00E-44 | 143  |
| TcMYB47 | ATMYB99  | 58.62 | 116 | 41  | 1  | 13  | 339  | 9   | 124 | 3.00E-44 | 142  |
| TcMYB47 | AtMYB60  | 61.9  | 105 | 40  | 0  | 25  | 339  | 12  | 116 | 4.00E-44 | 143  |
| TcMYB47 | ATMYB96  | 57.52 | 113 | 48  | 0  | 13  | 351  | 8   | 120 | 1.00E-43 | 144  |
| TcMYB47 | ATMYB58  | 56.88 | 109 | 47  | 0  | 13  | 339  | 10  | 118 | 1.00E-43 | 142  |
| TcMYB47 | ATMYB80  | 40.2  | 204 | 119 | 4  | 13  | 615  | 8   | 191 | 1.00E-43 | 143  |
| TcMYB47 | ATMYB72  | 57.8  | 109 | 46  | 0  | 13  | 339  | 10  | 118 | 2.00E-43 | 142  |
| TcMYB47 | ATMYB120 | 59.43 | 106 | 43  | 0  | 25  | 342  | 26  | 131 | 2.00E-43 | 147  |
| TcMYB47 | ATMYB26  | 53.17 | 126 | 50  | 1  | 16  | 366  | 9   | 134 | 2.00E-43 | 144  |
| TcMYB47 | AtMYB40  | 41.62 | 185 | 103 | 3  | 25  | 564  | 12  | 181 | 3.00E-43 | 140  |
| TcMYB47 | ATMYB30  | 53.33 | 120 | 56  | 0  | 13  | 372  | 8   | 127 | 3.00E-43 | 142  |
| TcMYB47 | ATMYB122 | 59.09 | 110 | 45  | 0  | 25  | 354  | 12  | 121 | 4.00E-43 | 142  |
| TcMYB47 | AtMYB81  | 56.76 | 111 | 44  | 1  | 13  | 333  | 12  | 122 | 5.00E-43 | 144  |
| TcMYB47 | ATMYB33  | 58.65 | 104 | 43  | 0  | 25  | 336  | 32  | 135 | 9.00E-43 | 145  |
| TcMYB47 | ATMYB65  | 56.73 | 104 | 45  | 0  | 25  | 336  | 41  | 144 | 2.00E-42 | 144  |
| TcMYB47 | ATMYB55  | 54.26 | 129 | 47  | 2  | 4   | 354  | 8   | 133 | 2.00E-41 | 138  |
| TcMYB47 | ATMYB87  | 59.43 | 106 | 42  | 1  | 25  | 339  | 12  | 117 | 5.00E-41 | 136  |
| TcMYB47 | ATMYB37  | 47.37 | 133 | 69  | 1  | 13  | 408  | 8   | 140 | 4.00E-40 | 134  |
| TcMYB47 | AtMYB36  | 46.48 | 142 | 73  | 2  | 13  | 429  | 8   | 149 | 2.00E-39 | 132  |
| TcMYB47 | AtMYB19  | 57.28 | 103 | 44  | 0  | 28  | 336  | 13  | 115 | 2.00E-39 | 130  |
| TcMYB47 | AtMYB114 | 54.81 | 104 | 47  | 0  | 25  | 336  | 8   | 111 | 3.00E-39 | 126  |
| TcMYB47 | AtMYB47  | 52.73 | 110 | 52  | 0  | 25  | 354  | 12  | 121 | 4.00E-39 | 130  |
| TcMYB47 | AtMYB45  | 54.13 | 109 | 50  | 1  | 7   | 333  | 13  | 120 | 5.00E-39 | 129  |
| TcMYB47 | ATMYB84  | 55.45 | 110 | 48  | 1  | 13  | 339  | 8   | 117 | 1.00E-38 | 130  |
| TcMYB47 | AtMYB18  | 53.45 | 116 | 53  | 1  | 28  | 372  | 11  | 126 | 4.00E-38 | 128  |
| TcMYB47 | ATMYB75  | 54.81 | 104 | 47  | 0  | 25  | 336  | 8   | 111 | 8.00E-38 | 126  |
| TcMYB47 | ATMYB68  | 52.21 | 113 | 53  | 1  | 13  | 348  | 8   | 120 | 2.00E-37 | 128  |
| TcMYB47 | AtMYB113 | 52.78 | 108 | 51  | 0  | 25  | 348  | 8   | 115 | 2.00E-37 | 125  |
| TcMYB47 | ATMYB90  | 54.81 | 104 | 47  | 0  | 25  | 336  | 8   | 111 | 2.00E-37 | 125  |
| TcMYB47 | ATMYB38  | 51.82 | 110 | 52  | 1  | 13  | 339  | 8   | 117 | 7.00E-37 | 125  |
| TcMYB47 | AtMYB104 | 44.44 | 108 | 60  | 1  | 31  | 354  | 18  | 124 | 5.00E-31 | 111  |
| TcMYB47 | AtMYB98  | 31.93 | 166 | 113 | 3  | 13  | 510  | 211 | 365 | 9.00E-30 | 108  |
| TcMYB47 | ATMYB119 | 31.84 | 223 | 150 | 6  | 7   | 669  | 97  | 309 | 9.00E-30 | 108  |
| TcMYB47 | ATMYB118 | 47.12 | 104 | 55  | 1  | 25  | 336  | 187 | 289 | 1.00E-29 | 108  |
| TcMYB47 | AtMYB64  | 43.48 | 115 | 64  | 2  | 7   | 348  | 97  | 209 | 4.00E-29 | 106  |
| TcMYB47 | AtMYB70  | 45.87 | 109 | 59  | 1  | 10  | 336  | 6   | 113 | 5.00E-29 | 104  |
| TcMYB47 | AtMYB70  | 25.81 | 62  | 45  | 1  | 181 | 363  | 10  | 71  | 3.00E-04 | 33.5 |
| TcMYB47 | ATMYB77  | 43.14 | 102 | 58  | 1  | 31  | 336  | 6   | 106 | 2.00E-28 | 102  |
| TcMYB47 | ATMYB73  | 46.08 | 102 | 55  | 1  | 31  | 336  | 13  | 113 | 3.00E-28 | 102  |
| TcMYB47 | ATMYB73  | 30.51 | 59  | 40  | 2  | 190 | 363  | 13  | 70  | 6.00E-04 | 32.7 |
| TcMYB47 | ATMYB25  | 38.03 | 142 | 84  | 2  | 31  | 444  | 50  | 190 | 3.00E-28 | 103  |
| TcMYB47 | AtMYB109 | 40.46 | 131 | 78  | 2  | 31  | 423  | 56  | 183 | 2.00E-27 | 101  |
| TcMYB47 | AtMYB1   | 44.76 | 105 | 58  | 1  | 31  | 345  | 55  | 158 | 2.00E-26 | 99   |
| TcMYB47 | AtMYB115 | 34.87 | 152 | 99  | 5  | 10  | 465  | 151 | 290 | 7.00E-26 | 97.1 |
| TcMYB47 | ATMYB44  | 42.16 | 102 | 59  | 1  | 31  | 336  | 6   | 106 | 1.00E-25 | 95.5 |
| TcMYB47 | AtMYB117 | 34.42 | 154 | 94  | 4  | 31  | 471  | 98  | 249 | 2.00E-25 | 95.9 |
| TcMYB47 | ATMYB105 | 40.91 | 110 | 64  | 2  | 25  | 351  | 105 | 212 | 2.00E-25 | 95.1 |
| TcMYB47 | AtMYB100 | 31.97 | 147 | 100 | 3  | 13  | 453  | 20  | 163 | 9.00E-25 | 91.7 |
| TcMYB47 | ATMYB52  | 32.8  | 189 | 117 | 5  | 31  | 567  | 5   | 183 | 2.00E-24 | 91.3 |
| TcMYB47 | ATMYB54  | 43.69 | 103 | 57  | 2  | 31  | 336  | 6   | 106 | 1.00E-23 | 89   |
| TcMYB47 | ATMYB54  | 26.03 | 73  | 45  | 2  | 190 | 381  | 6   | 78  | 4.00E-05 | 36.2 |
| TcMYB47 | ATMYB110 | 34.58 | 107 | 70  | 1  | 31  | 351  | 67  | 172 | 4.00E-23 | 88.6 |
| TcMYB47 | ATMYB91  | 40.78 | 103 | 59  | 2  | 40  | 342  | 7   | 108 | 4.00E-23 | 89.4 |
| TcMYB47 | AtMYB124 | 36.92 | 130 | 76  | 2  | 40  | 411  | 28  | 156 | 9.00E-23 | 89   |
| TcMYB47 | AtMYB56  | 38.1  | 105 | 65  | 1  | 31  | 345  | 93  | 196 | 7.00E-22 | 85.5 |
| TcMYB47 | ATMYB88  | 38.74 | 111 | 68  | 1  | 40  | 372  | 33  | 142 | 7.00E-22 | 86.7 |
| TcMYB47 | ATMYB69  | 35.09 | 114 | 74  | 1  | 4   | 345  | 10  | 122 | 3.00E-21 | 82.4 |
| TcMYB47 | AtMYB89  | 31.85 | 135 | 85  | 3  | 7   | 390  | 48  | 181 | 6.00E-20 | 77.8 |
| TcMYB47 | AtMYB22  | 31.5  | 127 | 87  | 3  | 13  | 393  | 48  | 171 | 2.00E-19 | 77.8 |
| TcMYB48 | ATMYB44  | 39.78 | 362 | 212 | 10 | 46  | 1113 | 2   | 285 | 3.00E-68 | 211  |
| TcMYB48 | ATMYB77  | 41.82 | 318 | 181 | 9  | 46  | 987  | 2   | 285 | 1.00E-65 | 204  |
| TcMYB48 | ATMYB73  | 37.96 | 353 | 219 | 8  | 49  | 1107 | 10  | 283 | 3.00E-61 | 193  |

|         |           |       |     |     |    |    |     |     |     |          |      |
|---------|-----------|-------|-----|-----|----|----|-----|-----|-----|----------|------|
| TcMYB48 | AtMYB109  | 45.07 | 213 | 109 | 5  | 52 | 666 | 54  | 257 | 2.00E-54 | 177  |
| TcMYB48 | AtMYB70   | 74.53 | 106 | 27  | 0  | 49 | 366 | 10  | 115 | 2.00E-53 | 172  |
| TcMYB48 | AtMYB1    | 41.63 | 233 | 125 | 5  | 49 | 714 | 52  | 262 | 1.00E-50 | 167  |
| TcMYB48 | ATMYB25   | 38.91 | 221 | 129 | 5  | 52 | 696 | 48  | 242 | 8.00E-46 | 154  |
| TcMYB48 | ATMYB105  | 48.76 | 121 | 62  | 0  | 58 | 420 | 107 | 227 | 4.00E-39 | 135  |
| TcMYB48 | ATMYB54   | 46.15 | 130 | 68  | 1  | 58 | 441 | 6   | 135 | 2.00E-38 | 131  |
| TcMYB48 | ATMYB69   | 45.52 | 134 | 69  | 1  | 58 | 447 | 19  | 152 | 7.00E-38 | 130  |
| TcMYB48 | AtMYB117  | 54.9  | 102 | 46  | 0  | 58 | 363 | 98  | 199 | 1.00E-37 | 132  |
| TcMYB48 | AtMYB56   | 36.46 | 192 | 122 | 1  | 58 | 633 | 93  | 278 | 1.00E-36 | 129  |
| TcMYB48 | ATMYB52   | 50.5  | 101 | 50  | 0  | 58 | 360 | 5   | 105 | 3.00E-36 | 125  |
| TcMYB48 | AtMYB98   | 56.73 | 104 | 45  | 0  | 55 | 366 | 216 | 319 | 3.00E-36 | 129  |
| TcMYB48 | ATMYB119  | 51.33 | 113 | 55  | 0  | 55 | 393 | 104 | 216 | 1.00E-34 | 125  |
| TcMYB48 | AtMYB64   | 35.58 | 208 | 132 | 4  | 55 | 672 | 104 | 298 | 1.00E-34 | 125  |
| TcMYB48 | ATMYB118  | 46.4  | 125 | 65  | 1  | 46 | 414 | 185 | 309 | 9.00E-34 | 123  |
| TcMYB48 | ATMYB46   | 36.22 | 196 | 116 | 5  | 58 | 618 | 20  | 211 | 1.00E-32 | 117  |
| TcMYB48 | AtMYB115  | 37.13 | 167 | 105 | 1  | 58 | 558 | 158 | 318 | 2.00E-32 | 118  |
| TcMYB48 | AtMYB82   | 39.86 | 148 | 87  | 3  | 58 | 495 | 14  | 155 | 6.00E-32 | 112  |
| TcMYB48 | ATMYB61   | 33.77 | 228 | 144 | 7  | 58 | 720 | 14  | 228 | 1.00E-31 | 116  |
| TcMYB48 | ATMYB14   | 43.61 | 133 | 73  | 3  | 58 | 450 | 14  | 142 | 1.00E-31 | 113  |
| TcMYB48 | ATMYB121  | 49.54 | 109 | 53  | 2  | 58 | 378 | 29  | 136 | 2.00E-31 | 113  |
| TcMYB48 | ATMYB80   | 47.71 | 109 | 56  | 1  | 58 | 381 | 14  | 122 | 2.00E-31 | 114  |
| TcMYB48 | ATMYB110  | 47.17 | 106 | 56  | 0  | 58 | 375 | 67  | 172 | 2.00E-31 | 114  |
| TcMYB48 | ATMYB72   | 37.7  | 183 | 105 | 6  | 58 | 579 | 16  | 188 | 3.00E-31 | 113  |
| TcMYB48 | AtMYB45   | 40.12 | 162 | 91  | 4  | 58 | 525 | 20  | 171 | 7.00E-31 | 111  |
| TcMYB48 | ATMYB92   | 51.46 | 103 | 48  | 2  | 58 | 360 | 14  | 115 | 8.00E-31 | 113  |
| TcMYB48 | ATMYB95   | 38.82 | 152 | 90  | 3  | 58 | 504 | 14  | 164 | 9.00E-31 | 111  |
| TcMYB48 | ATMYB37   | 43.7  | 135 | 74  | 3  | 58 | 456 | 14  | 146 | 1.00E-30 | 112  |
| TcMYB48 | ATMYB58   | 40.76 | 157 | 91  | 5  | 58 | 522 | 16  | 161 | 2.00E-30 | 110  |
| TcMYB48 | AtMYB74   | 42.54 | 134 | 76  | 1  | 58 | 456 | 15  | 148 | 2.00E-30 | 111  |
| TcMYB48 | ATMYB120  | 29.85 | 268 | 181 | 7  | 58 | 840 | 28  | 283 | 3.00E-30 | 114  |
| TcMYB48 | AtMYB41   | 44.8  | 125 | 68  | 1  | 58 | 429 | 14  | 138 | 3.00E-30 | 110  |
| TcMYB48 | AtMYB17   | 39.1  | 156 | 93  | 4  | 58 | 519 | 14  | 160 | 3.00E-30 | 110  |
| TcMYB48 | ATMYB35   | 30.65 | 248 | 151 | 6  | 58 | 738 | 14  | 261 | 3.00E-30 | 111  |
| TcMYB48 | ATMYB67   | 30.26 | 228 | 152 | 6  | 58 | 720 | 24  | 227 | 3.00E-30 | 110  |
| TcMYB48 | ATMYB59-3 | 31.58 | 228 | 151 | 7  | 58 | 726 | 10  | 202 | 4.00E-30 | 108  |
| TcMYB48 | AtMYB36   | 38.89 | 144 | 86  | 3  | 58 | 483 | 14  | 151 | 4.00E-30 | 111  |
| TcMYB48 | ATMYB101  | 35.1  | 208 | 107 | 6  | 58 | 597 | 20  | 214 | 4.00E-30 | 113  |
| TcMYB48 | AtMYB97   | 53.47 | 101 | 46  | 1  | 58 | 357 | 21  | 121 | 7.00E-30 | 111  |
| TcMYB48 | ATMYB86   | 35.35 | 215 | 125 | 6  | 58 | 660 | 14  | 223 | 7.00E-30 | 110  |
| TcMYB48 | AtMYB50   | 35.26 | 190 | 120 | 3  | 58 | 618 | 14  | 202 | 1.00E-29 | 109  |
| TcMYB48 | ATMYB48   | 37.76 | 143 | 86  | 3  | 58 | 477 | 9   | 150 | 1.00E-29 | 108  |
| TcMYB48 | AtMYB27   | 39.38 | 160 | 90  | 5  | 58 | 516 | 11  | 161 | 2.00E-29 | 107  |
| TcMYB48 | ATMYB13   | 40.54 | 148 | 86  | 3  | 58 | 495 | 14  | 159 | 2.00E-29 | 107  |
| TcMYB48 | ATMYB102  | 40.43 | 141 | 83  | 1  | 58 | 477 | 14  | 154 | 2.00E-29 | 109  |
| TcMYB48 | ATMYB34   | 47.71 | 109 | 56  | 1  | 58 | 381 | 14  | 122 | 2.00E-29 | 108  |
| TcMYB48 | AtMYB19   | 41.43 | 140 | 80  | 3  | 58 | 471 | 14  | 144 | 2.00E-29 | 107  |
| TcMYB48 | AtMYB107  | 49.02 | 102 | 51  | 1  | 58 | 360 | 14  | 115 | 3.00E-29 | 108  |
| TcMYB48 | AtMYB79   | 46.49 | 114 | 59  | 3  | 58 | 393 | 8   | 116 | 3.00E-29 | 107  |
| TcMYB48 | ATMYB63   | 32.43 | 222 | 117 | 6  | 58 | 624 | 16  | 236 | 3.00E-29 | 107  |
| TcMYB48 | ATMYB28   | 31.71 | 246 | 166 | 6  | 58 | 789 | 14  | 233 | 4.00E-29 | 108  |
| TcMYB48 | AtMYB51   | 45.87 | 109 | 58  | 1  | 58 | 381 | 15  | 123 | 5.00E-29 | 108  |
| TcMYB48 | AtMYB83   | 48.31 | 118 | 60  | 2  | 58 | 408 | 32  | 147 | 6.00E-29 | 108  |
| TcMYB48 | ATMYB26   | 48.25 | 114 | 49  | 2  | 58 | 369 | 14  | 127 | 6.00E-29 | 108  |
| TcMYB48 | ATMYB65   | 50.98 | 102 | 49  | 1  | 58 | 360 | 43  | 144 | 7.00E-29 | 110  |
| TcMYB48 | AtMYB53   | 49.51 | 103 | 50  | 2  | 58 | 360 | 14  | 115 | 9.00E-29 | 107  |
| TcMYB48 | ATMYB106  | 29.96 | 257 | 169 | 6  | 58 | 795 | 57  | 283 | 1.00E-28 | 108  |
| TcMYB48 | ATMYB3    | 32.18 | 202 | 136 | 5  | 40 | 642 | 16  | 199 | 1.00E-28 | 104  |
| TcMYB48 | AtMYB112  | 35.12 | 168 | 106 | 2  | 22 | 516 | 22  | 189 | 1.00E-28 | 105  |
| TcMYB48 | AtMYB60   | 43.36 | 113 | 59  | 2  | 58 | 381 | 14  | 122 | 1.00E-28 | 105  |
| TcMYB48 | ATMYB87   | 29.05 | 241 | 154 | 5  | 58 | 729 | 14  | 244 | 2.00E-28 | 106  |
| TcMYB48 | ATMYB3    | 44.35 | 115 | 63  | 1  | 58 | 399 | 14  | 128 | 2.00E-28 | 105  |
| TcMYB48 | ATMYB33   | 50.98 | 102 | 49  | 1  | 58 | 360 | 34  | 135 | 3.00E-28 | 108  |
| TcMYB48 | AtMYB9    | 49.02 | 102 | 51  | 1  | 58 | 360 | 14  | 115 | 3.00E-28 | 106  |
| TcMYB48 | AtMYB6    | 35.29 | 170 | 100 | 4  | 58 | 537 | 14  | 183 | 3.00E-28 | 103  |
| TcMYB48 | ATMYB15   | 33.7  | 184 | 117 | 4  | 58 | 594 | 14  | 192 | 3.00E-28 | 105  |
| TcMYB48 | ATMYB16   | 37.42 | 163 | 101 | 2  | 58 | 543 | 14  | 170 | 3.00E-28 | 105  |
| TcMYB48 | AtMYB49   | 38.73 | 142 | 86  | 1  | 58 | 480 | 14  | 155 | 4.00E-28 | 105  |
| TcMYB48 | ATMYB71   | 29.7  | 266 | 176 | 9  | 58 | 822 | 20  | 258 | 4.00E-28 | 104  |
| TcMYB48 | AtMYB116  | 44.35 | 115 | 63  | 2  | 46 | 387 | 16  | 126 | 5.00E-28 | 104  |
| TcMYB48 | MYB8      | 44.95 | 109 | 59  | 1  | 58 | 381 | 14  | 122 | 6.00E-28 | 102  |
| TcMYB48 | ATMYB30   | 38.36 | 146 | 88  | 3  | 58 | 489 | 14  | 150 | 8.00E-28 | 104  |
| TcMYB48 | AtMYB10   | 41.94 | 124 | 65  | 3  | 58 | 408 | 16  | 138 | 1.00E-27 | 102  |
| TcMYB48 | AtMYB10   | 25.61 | 82  | 61  | 1  | 58 | 303 | 69  | 149 | 7.00E-04 | 33.1 |
| TcMYB48 | AtMYB103  | 42.28 | 123 | 70  | 1  | 58 | 423 | 14  | 136 | 1.00E-27 | 104  |
| TcMYB48 | AtMYB81   | 31.44 | 264 | 180 | 11 | 58 | 846 | 22  | 238 | 2.00E-27 | 105  |
| TcMYB48 | ATMYB2    | 35.63 | 174 | 105 | 5  | 58 | 558 | 22  | 191 | 2.00E-27 | 102  |
| TcMYB48 | ATMYB122  | 46.53 | 101 | 53  | 1  | 58 | 357 | 14  | 114 | 2.00E-27 | 103  |
| TcMYB48 | AtMYB40   | 33.73 | 166 | 108 | 4  | 58 | 549 | 14  | 169 | 2.00E-27 | 102  |
| TcMYB48 | AtMYB47   | 37.5  | 152 | 90  | 3  | 58 | 498 | 14  | 164 | 2.00E-27 | 102  |
| TcMYB48 | AtMYB32   | 40.26 | 154 | 90  | 4  | 58 | 513 | 14  | 159 | 2.00E-27 | 102  |

|         |           |       |     |     |    |    |      |     |     |          |      |
|---------|-----------|-------|-----|-----|----|----|------|-----|-----|----------|------|
| TcMYB48 | ATMYB66   | 38.85 | 139 | 78  | 4  | 58 | 453  | 18  | 154 | 2.00E-27 | 100  |
| TcMYB48 | AtMYB100  | 40.71 | 113 | 65  | 1  | 67 | 399  | 29  | 141 | 3.00E-27 | 101  |
| TcMYB48 | ATMYB55   | 46.96 | 115 | 47  | 2  | 58 | 360  | 14  | 127 | 3.00E-27 | 103  |
| TcMYB48 | AtMYB93   | 48.04 | 102 | 52  | 1  | 58 | 360  | 14  | 115 | 4.00E-27 | 103  |
| TcMYB48 | ATMYB68   | 48.54 | 103 | 51  | 2  | 58 | 360  | 14  | 116 | 4.00E-27 | 103  |
| TcMYB48 | ATMYB84   | 47.57 | 103 | 52  | 2  | 58 | 360  | 14  | 116 | 4.00E-27 | 102  |
| TcMYB48 | AtMYB18   | 40.85 | 142 | 80  | 3  | 58 | 471  | 12  | 143 | 5.00E-27 | 101  |
| TcMYB48 | ATMYB96   | 41.8  | 122 | 66  | 2  | 58 | 408  | 14  | 131 | 6.00E-27 | 102  |
| TcMYB48 | AtMYB89   | 43.43 | 99  | 56  | 0  | 61 | 357  | 57  | 155 | 6.00E-27 | 99   |
| TcMYB48 | ATMYB38   | 31.53 | 222 | 126 | 5  | 58 | 645  | 14  | 233 | 6.00E-27 | 101  |
| TcMYB48 | MYB7      | 35.48 | 155 | 99  | 2  | 58 | 519  | 14  | 167 | 7.00E-27 | 100  |
| TcMYB48 | ATMYB4    | 45.87 | 109 | 58  | 1  | 58 | 381  | 14  | 122 | 9.00E-27 | 100  |
| TcMYB48 | ATMYB123  | 45.05 | 111 | 59  | 2  | 34 | 360  | 8   | 117 | 2.00E-26 | 99.8 |
| TcMYB48 | ATMYB31   | 36.69 | 139 | 66  | 3  | 58 | 408  | 14  | 148 | 2.00E-26 | 100  |
| TcMYB48 | AtMYB24   | 44.76 | 105 | 57  | 1  | 46 | 357  | 15  | 119 | 2.00E-26 | 98.2 |
| TcMYB48 | ATMYB57   | 40.71 | 113 | 66  | 1  | 58 | 393  | 27  | 139 | 2.00E-26 | 97.8 |
| TcMYB48 | AtMYB42   | 38.81 | 134 | 80  | 2  | 58 | 453  | 14  | 146 | 3.00E-26 | 99.8 |
| TcMYB48 | ATMYB23   | 45.63 | 103 | 54  | 2  | 58 | 360  | 14  | 115 | 3.00E-26 | 97.8 |
| TcMYB48 | ATMYB111  | 36.59 | 164 | 102 | 3  | 58 | 543  | 14  | 172 | 5.00E-26 | 100  |
| TcMYB48 | ATMYB94   | 36.11 | 144 | 84  | 3  | 58 | 465  | 14  | 153 | 5.00E-26 | 99.8 |
| TcMYB48 | AtMYB62   | 44.64 | 112 | 60  | 3  | 58 | 387  | 21  | 127 | 7.00E-26 | 98.6 |
| TcMYB48 | ATMYB11   | 48.04 | 102 | 52  | 1  | 58 | 360  | 14  | 115 | 9.00E-26 | 99.4 |
| TcMYB48 | ATMYB0    | 36.49 | 148 | 89  | 3  | 58 | 486  | 16  | 158 | 1.00E-25 | 96.7 |
| TcMYB48 | ATMYB5    | 42.62 | 122 | 62  | 3  | 58 | 399  | 25  | 145 | 2.00E-25 | 96.7 |
| TcMYB48 | AtMYB76   | 44.04 | 109 | 60  | 1  | 58 | 381  | 14  | 122 | 2.00E-25 | 98.2 |
| TcMYB48 | AtMYB108  | 35.48 | 155 | 93  | 4  | 58 | 501  | 21  | 174 | 2.00E-25 | 97.8 |
| TcMYB48 | AtMYB114  | 41.75 | 103 | 59  | 1  | 58 | 363  | 10  | 112 | 4.00E-25 | 92.4 |
| TcMYB48 | ATMYB29   | 46.53 | 101 | 53  | 1  | 58 | 357  | 14  | 114 | 5.00E-25 | 97.1 |
| TcMYB48 | AtMYB20   | 44.66 | 103 | 55  | 2  | 58 | 360  | 14  | 115 | 8.00E-25 | 95.5 |
| TcMYB48 | AtMYB85   | 44.66 | 103 | 55  | 2  | 58 | 360  | 14  | 115 | 2.00E-24 | 94.4 |
| TcMYB48 | ATMYB12   | 29.9  | 194 | 135 | 2  | 58 | 636  | 14  | 205 | 4.00E-24 | 95.1 |
| TcMYB48 | AtMYB104  | 44.12 | 102 | 55  | 2  | 58 | 357  | 18  | 118 | 6.00E-24 | 94.7 |
| TcMYB48 | AtMYB113  | 33.99 | 153 | 94  | 4  | 58 | 495  | 10  | 152 | 1.00E-23 | 91.7 |
| TcMYB48 | AtMYB43   | 31.79 | 173 | 116 | 4  | 58 | 570  | 14  | 177 | 1.00E-23 | 92.8 |
| TcMYB48 | ATMYB90   | 40.95 | 105 | 61  | 1  | 58 | 369  | 10  | 114 | 1.00E-23 | 91.3 |
| TcMYB48 | AtMYB22   | 33.83 | 133 | 86  | 2  | 7  | 399  | 37  | 168 | 2.00E-23 | 91.3 |
| TcMYB48 | ATMYB75   | 41.12 | 107 | 58  | 2  | 58 | 363  | 10  | 112 | 2.00E-23 | 90.9 |
| TcMYB48 | AtMYB124  | 31.78 | 129 | 88  | 0  | 67 | 453  | 28  | 156 | 4.00E-22 | 89.7 |
| TcMYB48 | AtMYB124  | 19.88 | 171 | 129 | 5  | 58 | 546  | 77  | 237 | 2.00E-04 | 35   |
| TcMYB48 | ATMYB78   | 31.16 | 199 | 111 | 6  | 58 | 576  | 28  | 226 | 5.00E-22 | 88.2 |
| TcMYB48 | ATMYB88   | 37.86 | 103 | 64  | 0  | 67 | 375  | 33  | 135 | 5.00E-22 | 89.7 |
| TcMYB48 | ATMYB88   | 32.08 | 53  | 36  | 1  | 58 | 216  | 82  | 133 | 7.00E-04 | 33.5 |
| TcMYB48 | ATMYB99   | 39.52 | 124 | 63  | 4  | 58 | 393  | 15  | 134 | 2.00E-21 | 85.1 |
| TcMYB48 | ATMYB91   | 32.71 | 107 | 69  | 1  | 67 | 378  | 7   | 113 | 6.00E-16 | 70.9 |
| TcMYB49 | AtMYB109  | 42.09 | 335 | 188 | 9  | 10 | 996  | 47  | 335 | 8.00E-75 | 233  |
| TcMYB49 | ATMYB25   | 35.04 | 391 | 247 | 11 | 13 | 1164 | 42  | 362 | 3.00E-62 | 199  |
| TcMYB49 | AtMYB1    | 37.99 | 329 | 203 | 7  | 7  | 990  | 46  | 325 | 4.00E-62 | 199  |
| TcMYB49 | ATMYB73   | 73.08 | 104 | 28  | 0  | 28 | 339  | 10  | 113 | 8.00E-52 | 170  |
| TcMYB49 | ATMYB44   | 69.72 | 109 | 33  | 0  | 28 | 354  | 3   | 111 | 1.00E-51 | 169  |
| TcMYB49 | AtMYB70   | 71.96 | 107 | 30  | 0  | 28 | 348  | 10  | 116 | 3.00E-51 | 168  |
| TcMYB49 | ATMYB77   | 68.22 | 107 | 34  | 0  | 28 | 348  | 3   | 109 | 4.00E-50 | 165  |
| TcMYB49 | ATMYB54   | 56.44 | 101 | 44  | 0  | 37 | 339  | 6   | 106 | 1.00E-39 | 135  |
| TcMYB49 | ATMYB52   | 55.45 | 101 | 45  | 0  | 37 | 339  | 5   | 105 | 1.00E-38 | 133  |
| TcMYB49 | AtMYB117  | 54.9  | 102 | 46  | 0  | 37 | 342  | 98  | 199 | 2.00E-37 | 133  |
| TcMYB49 | ATMYB69   | 54.46 | 101 | 46  | 0  | 37 | 339  | 19  | 119 | 2.00E-37 | 130  |
| TcMYB49 | ATMYB105  | 53.92 | 102 | 47  | 0  | 37 | 342  | 107 | 208 | 6.00E-37 | 130  |
| TcMYB49 | ATMYB118  | 48.48 | 132 | 68  | 0  | 34 | 429  | 188 | 319 | 2.00E-36 | 132  |
| TcMYB49 | AtMYB56   | 54.46 | 101 | 46  | 0  | 37 | 339  | 93  | 193 | 4.00E-36 | 128  |
| TcMYB49 | AtMYB98   | 53.4  | 103 | 48  | 0  | 34 | 342  | 216 | 318 | 9.00E-36 | 129  |
| TcMYB49 | ATMYB110  | 51.49 | 101 | 49  | 0  | 37 | 339  | 67  | 167 | 9.00E-34 | 121  |
| TcMYB49 | AtMYB51   | 42.66 | 143 | 79  | 3  | 37 | 456  | 15  | 156 | 2.00E-33 | 122  |
| TcMYB49 | AtMYB115  | 36.36 | 154 | 98  | 1  | 37 | 498  | 158 | 310 | 3.00E-33 | 121  |
| TcMYB49 | ATMYB119  | 39.6  | 149 | 79  | 2  | 34 | 447  | 104 | 251 | 3.00E-33 | 122  |
| TcMYB49 | ATMYB121  | 38.1  | 189 | 106 | 5  | 37 | 570  | 29  | 207 | 5.00E-33 | 119  |
| TcMYB49 | AtMYB64   | 50.98 | 102 | 50  | 0  | 34 | 339  | 104 | 205 | 9.00E-33 | 121  |
| TcMYB49 | ATMYB59-3 | 49.53 | 107 | 52  | 2  | 25 | 339  | 6   | 111 | 7.00E-32 | 114  |
| TcMYB49 | ATMYB59-3 | 21.49 | 121 | 95  | 2  | 37 | 399  | 63  | 175 | 1.00E-04 | 35.8 |
| TcMYB49 | AtMYB27   | 41.29 | 155 | 87  | 4  | 37 | 489  | 11  | 164 | 7.00E-32 | 114  |
| TcMYB49 | ATMYB66   | 37.25 | 204 | 109 | 7  | 7  | 561  | 8   | 199 | 1.00E-31 | 113  |
| TcMYB49 | ATMYB48   | 51.46 | 103 | 48  | 2  | 37 | 339  | 9   | 110 | 1.00E-31 | 114  |
| TcMYB49 | ATMYB48   | 31.48 | 54  | 37  | 1  | 37 | 198  | 62  | 114 | 3.00E-04 | 34.7 |
| TcMYB49 | AtMYB19   | 39.63 | 164 | 97  | 3  | 4  | 489  | 3   | 162 | 4.00E-31 | 113  |
| TcMYB49 | AtMYB17   | 49.53 | 107 | 52  | 2  | 37 | 351  | 14  | 119 | 5.00E-31 | 114  |
| TcMYB49 | ATMYB63   | 39.24 | 158 | 87  | 3  | 37 | 483  | 16  | 169 | 9.00E-31 | 113  |
| TcMYB49 | AtMYB45   | 39.74 | 156 | 92  | 3  | 25 | 486  | 16  | 160 | 1.00E-30 | 112  |
| TcMYB49 | AtMYB36   | 50.46 | 109 | 52  | 2  | 37 | 357  | 14  | 122 | 3.00E-30 | 112  |
| TcMYB49 | ATMYB96   | 44.78 | 134 | 65  | 3  | 37 | 411  | 14  | 143 | 3.00E-30 | 112  |
| TcMYB49 | AtMYB107  | 50.46 | 109 | 51  | 2  | 37 | 354  | 14  | 122 | 4.00E-30 | 112  |
| TcMYB49 | AtMYB47   | 47.37 | 114 | 57  | 2  | 37 | 369  | 14  | 127 | 5.00E-30 | 110  |
| TcMYB49 | ATMYB15   | 39.88 | 168 | 94  | 4  | 37 | 519  | 14  | 180 | 5.00E-30 | 110  |

|         |          |       |     |     |   |    |     |    |     |          |      |
|---------|----------|-------|-----|-----|---|----|-----|----|-----|----------|------|
| TcMYB49 | ATMYB31  | 41.91 | 136 | 74  | 3 | 37 | 429 | 14 | 144 | 6.00E-30 | 111  |
| TcMYB49 | AtMYB9   | 51.38 | 109 | 50  | 2 | 37 | 354 | 14 | 122 | 7.00E-30 | 111  |
| TcMYB49 | AtMYB10  | 37.91 | 153 | 93  | 3 | 37 | 489 | 16 | 162 | 1.00E-29 | 108  |
| TcMYB49 | ATMYB101 | 37.35 | 166 | 96  | 4 | 37 | 510 | 20 | 184 | 1.00E-29 | 113  |
| TcMYB49 | ATMYB95  | 46.67 | 120 | 61  | 2 | 37 | 387 | 14 | 133 | 1.00E-29 | 109  |
| TcMYB49 | AtMYB89  | 45.45 | 99  | 54  | 0 | 40 | 336 | 57 | 155 | 1.00E-29 | 107  |
| TcMYB49 | ATMYB30  | 41.55 | 142 | 77  | 3 | 37 | 444 | 14 | 151 | 1.00E-29 | 110  |
| TcMYB49 | AtMYB74  | 49.54 | 109 | 52  | 2 | 37 | 354 | 15 | 123 | 1.00E-29 | 110  |
| TcMYB49 | ATMYB5   | 47.29 | 129 | 64  | 3 | 37 | 411 | 25 | 153 | 2.00E-29 | 108  |
| TcMYB49 | AtMYB93  | 50.46 | 109 | 51  | 2 | 37 | 354 | 14 | 122 | 2.00E-29 | 110  |
| TcMYB49 | AtMYB60  | 50.94 | 106 | 47  | 2 | 37 | 339 | 14 | 115 | 2.00E-29 | 108  |
| TcMYB49 | ATMYB3   | 50.46 | 109 | 51  | 2 | 37 | 354 | 14 | 122 | 3.00E-29 | 108  |
| TcMYB49 | ATMYB67  | 40.26 | 154 | 87  | 5 | 22 | 468 | 18 | 165 | 3.00E-29 | 109  |
| TcMYB49 | AtMYB97  | 41.67 | 132 | 75  | 2 | 4  | 393 | 10 | 141 | 3.00E-29 | 110  |
| TcMYB49 | AtMYB53  | 50.48 | 105 | 50  | 2 | 37 | 345 | 14 | 117 | 4.00E-29 | 108  |
| TcMYB49 | AtMYB81  | 46.49 | 114 | 59  | 2 | 37 | 372 | 22 | 135 | 5.00E-29 | 110  |
| TcMYB49 | ATMYB34  | 48.33 | 120 | 58  | 3 | 37 | 384 | 14 | 133 | 6.00E-29 | 108  |
| TcMYB49 | AtMYB50  | 49.59 | 123 | 57  | 4 | 37 | 390 | 14 | 135 | 6.00E-29 | 108  |
| TcMYB49 | ATMYB14  | 34.07 | 182 | 115 | 5 | 37 | 567 | 14 | 183 | 8.00E-29 | 106  |
| TcMYB49 | ATMYB72  | 44.44 | 126 | 68  | 3 | 37 | 408 | 16 | 139 | 8.00E-29 | 107  |
| TcMYB49 | ATMYB94  | 49.06 | 106 | 49  | 2 | 37 | 339 | 14 | 115 | 8.00E-29 | 108  |
| TcMYB49 | AtMYB41  | 47.71 | 109 | 54  | 2 | 37 | 354 | 14 | 122 | 8.00E-29 | 107  |
| TcMYB49 | ATMYB35  | 34.59 | 185 | 107 | 4 | 37 | 549 | 14 | 195 | 8.00E-29 | 108  |
| TcMYB49 | AtMYB18  | 48.18 | 110 | 55  | 2 | 22 | 345 | 7  | 115 | 8.00E-29 | 107  |
| TcMYB49 | ATMYB92  | 47.62 | 105 | 53  | 2 | 37 | 345 | 14 | 117 | 1.00E-28 | 108  |
| TcMYB49 | ATMYB80  | 46.23 | 106 | 56  | 1 | 37 | 351 | 14 | 119 | 1.00E-28 | 107  |
| TcMYB49 | ATMYB106 | 45.31 | 128 | 63  | 3 | 37 | 399 | 57 | 184 | 1.00E-28 | 108  |
| TcMYB49 | ATMYB102 | 49.54 | 109 | 52  | 2 | 37 | 354 | 14 | 122 | 1.00E-28 | 108  |
| TcMYB49 | ATMYB122 | 40    | 140 | 81  | 2 | 37 | 447 | 14 | 153 | 2.00E-28 | 107  |
| TcMYB49 | AtMYB49  | 45    | 120 | 63  | 2 | 4  | 354 | 3  | 122 | 2.00E-28 | 107  |
| TcMYB49 | ATMYB87  | 50.48 | 105 | 50  | 2 | 37 | 345 | 14 | 118 | 2.00E-28 | 107  |
| TcMYB49 | ATMYB84  | 39.19 | 148 | 80  | 4 | 37 | 450 | 14 | 159 | 2.00E-28 | 107  |
| TcMYB49 | ATMYB65  | 50    | 102 | 50  | 1 | 37 | 339 | 43 | 144 | 2.00E-28 | 110  |
| TcMYB49 | MYB8     | 48.62 | 109 | 53  | 2 | 37 | 354 | 14 | 122 | 2.00E-28 | 104  |
| TcMYB49 | ATMYB120 | 50.5  | 101 | 49  | 1 | 37 | 336 | 28 | 128 | 2.00E-28 | 109  |
| TcMYB49 | ATMYB13  | 40.82 | 147 | 80  | 4 | 37 | 456 | 14 | 149 | 3.00E-28 | 105  |
| TcMYB49 | AtMYB116 | 42.86 | 119 | 65  | 2 | 7  | 354 | 10 | 128 | 3.00E-28 | 105  |
| TcMYB49 | ATMYB55  | 39.62 | 159 | 76  | 4 | 37 | 453 | 14 | 171 | 4.00E-28 | 107  |
| TcMYB49 | AtMYB24  | 45.95 | 111 | 58  | 2 | 10 | 336 | 9  | 119 | 5.00E-28 | 103  |
| TcMYB49 | ATMYB37  | 50.48 | 105 | 50  | 2 | 37 | 345 | 14 | 118 | 5.00E-28 | 106  |
| TcMYB49 | ATMYB23  | 46.85 | 111 | 57  | 2 | 13 | 339 | 6  | 115 | 5.00E-28 | 103  |
| TcMYB49 | AtMYB6   | 38.41 | 164 | 88  | 4 | 37 | 489 | 14 | 177 | 6.00E-28 | 103  |
| TcMYB49 | ATMYB4   | 43.88 | 139 | 72  | 4 | 37 | 435 | 14 | 151 | 6.00E-28 | 105  |
| TcMYB49 | AtMYB83  | 40.99 | 161 | 94  | 3 | 10 | 489 | 23 | 175 | 6.00E-28 | 106  |
| TcMYB49 | ATMYB33  | 50    | 102 | 50  | 1 | 37 | 339 | 34 | 135 | 8.00E-28 | 108  |
| TcMYB49 | ATMYB16  | 44.53 | 128 | 62  | 3 | 37 | 393 | 14 | 141 | 1.00E-27 | 105  |
| TcMYB49 | ATMYB46  | 44.07 | 118 | 65  | 1 | 37 | 387 | 20 | 137 | 2.00E-27 | 103  |
| TcMYB49 | ATMYB38  | 49.52 | 105 | 51  | 2 | 37 | 345 | 14 | 118 | 2.00E-27 | 103  |
| TcMYB49 | AtMYB104 | 44.35 | 115 | 61  | 3 | 37 | 372 | 18 | 131 | 2.00E-27 | 105  |
| TcMYB49 | MYB7     | 36.99 | 173 | 95  | 4 | 37 | 513 | 14 | 186 | 2.00E-27 | 103  |
| TcMYB49 | AtMYB82  | 47.57 | 103 | 52  | 2 | 37 | 339 | 14 | 115 | 2.00E-27 | 101  |
| TcMYB49 | ATMYB68  | 40.56 | 143 | 83  | 4 | 37 | 459 | 14 | 151 | 2.00E-27 | 105  |
| TcMYB49 | AtMYB42  | 38.19 | 144 | 87  | 3 | 37 | 462 | 14 | 151 | 3.00E-27 | 103  |
| TcMYB49 | ATMYB71  | 48.54 | 103 | 51  | 2 | 37 | 339 | 20 | 121 | 4.00E-27 | 102  |
| TcMYB49 | ATMYB2   | 49.02 | 102 | 51  | 1 | 37 | 339 | 22 | 123 | 4.00E-27 | 102  |
| TcMYB49 | AtMYB32  | 43.8  | 137 | 66  | 3 | 25 | 402 | 10 | 146 | 4.00E-27 | 102  |
| TcMYB49 | AtMYB103 | 48.54 | 103 | 51  | 2 | 37 | 339 | 14 | 115 | 8.00E-27 | 103  |
| TcMYB49 | ATMYB0   | 46.23 | 106 | 55  | 2 | 37 | 348 | 16 | 120 | 8.00E-27 | 100  |
| TcMYB49 | ATMYB61  | 50.49 | 103 | 49  | 2 | 37 | 339 | 14 | 115 | 1.00E-26 | 103  |
| TcMYB49 | ATMYB61  | 31.48 | 54  | 37  | 1 | 37 | 198 | 67 | 119 | 6.00E-04 | 33.9 |
| TcMYB49 | ATMYB26  | 32.46 | 228 | 139 | 6 | 37 | 675 | 14 | 237 | 1.00E-26 | 103  |
| TcMYB49 | ATMYB3   | 36.42 | 151 | 94  | 2 | 7  | 453 | 12 | 162 | 1.00E-26 | 100  |
| TcMYB49 | ATMYB123 | 45.79 | 107 | 56  | 2 | 25 | 339 | 12 | 117 | 1.00E-26 | 100  |
| TcMYB49 | ATMYB86  | 49.51 | 103 | 50  | 2 | 37 | 339 | 14 | 115 | 1.00E-26 | 102  |
| TcMYB49 | AtMYB40  | 45.45 | 110 | 56  | 3 | 37 | 354 | 14 | 122 | 1.00E-26 | 100  |
| TcMYB49 | ATMYB28  | 44.44 | 135 | 67  | 4 | 22 | 402 | 9  | 139 | 1.00E-26 | 102  |
| TcMYB49 | AtMYB100 | 33.56 | 149 | 87  | 2 | 46 | 456 | 29 | 177 | 2.00E-26 | 99.8 |
| TcMYB49 | AtMYB79  | 46.6  | 103 | 53  | 2 | 37 | 339 | 8  | 109 | 2.00E-26 | 100  |
| TcMYB49 | ATMYB57  | 47.52 | 101 | 52  | 1 | 37 | 336 | 27 | 127 | 2.00E-26 | 98.6 |
| TcMYB49 | AtMYB76  | 40.79 | 152 | 82  | 5 | 22 | 453 | 9  | 155 | 3.00E-26 | 101  |
| TcMYB49 | AtMYB20  | 36.42 | 151 | 92  | 3 | 37 | 477 | 14 | 163 | 3.00E-26 | 100  |
| TcMYB49 | ATMYB58  | 41.67 | 132 | 76  | 1 | 37 | 429 | 16 | 147 | 4.00E-26 | 99.8 |
| TcMYB49 | ATMYB29  | 42.45 | 139 | 63  | 3 | 22 | 387 | 9  | 143 | 2.00E-25 | 99   |
| TcMYB49 | AtMYB85  | 46.36 | 110 | 55  | 3 | 37 | 354 | 14 | 122 | 2.00E-25 | 97.4 |
| TcMYB49 | AtMYB114 | 41.75 | 103 | 59  | 1 | 37 | 342 | 10 | 112 | 3.00E-25 | 93.6 |
| TcMYB49 | ATMYB111 | 48.04 | 102 | 52  | 1 | 37 | 339 | 14 | 115 | 1.00E-24 | 96.7 |
| TcMYB49 | ATMYB99  | 46.28 | 121 | 50  | 5 | 37 | 354 | 15 | 130 | 2.00E-24 | 94.4 |
| TcMYB49 | ATMYB12  | 47.06 | 102 | 53  | 1 | 37 | 339 | 14 | 115 | 2.00E-24 | 96.7 |
| TcMYB49 | AtMYB62  | 40.87 | 115 | 65  | 3 | 4  | 339 | 9  | 122 | 2.00E-24 | 95.1 |
| TcMYB49 | ATMYB11  | 46.67 | 105 | 55  | 1 | 37 | 348 | 14 | 118 | 3.00E-24 | 95.9 |

|         |          |       |     |     |   |     |     |    |     |          |      |
|---------|----------|-------|-----|-----|---|-----|-----|----|-----|----------|------|
| TcMYB49 | AtMYB43  | 36.24 | 149 | 86  | 4 | 37  | 456 | 14 | 161 | 5.00E-24 | 94.7 |
| TcMYB49 | ATMYB90  | 41.75 | 103 | 59  | 1 | 37  | 342 | 10 | 112 | 7.00E-24 | 92.8 |
| TcMYB49 | ATMYB75  | 40.78 | 103 | 60  | 1 | 37  | 342 | 10 | 112 | 9.00E-24 | 92.4 |
| TcMYB49 | AtMYB113 | 41.75 | 103 | 59  | 1 | 37  | 342 | 10 | 112 | 1.00E-23 | 92   |
| TcMYB49 | AtMYB108 | 41.74 | 115 | 64  | 3 | 1   | 336 | 8  | 121 | 4.00E-23 | 92   |
| TcMYB49 | AtMYB112 | 40.59 | 101 | 59  | 1 | 37  | 336 | 34 | 134 | 8.00E-23 | 89.7 |
| TcMYB49 | AtMYB22  | 32.47 | 154 | 104 | 4 | 37  | 498 | 54 | 199 | 1.00E-22 | 89.4 |
| TcMYB49 | AtMYB22  | 20.11 | 184 | 134 | 6 | 187 | 699 | 52 | 232 | 3.00E-04 | 34.7 |
| TcMYB49 | ATMYB88  | 37.17 | 113 | 71  | 0 | 1   | 339 | 18 | 130 | 6.00E-22 | 90.5 |
| TcMYB49 | AtMYB124 | 37.07 | 116 | 69  | 1 | 4   | 339 | 10 | 125 | 1.00E-21 | 89.4 |
| TcMYB49 | ATMYB91  | 32.26 | 155 | 96  | 3 | 46  | 483 | 7  | 161 | 4.00E-20 | 84   |
| TcMYB49 | ATMYB78  | 39.13 | 115 | 55  | 2 | 37  | 336 | 28 | 142 | 5.00E-20 | 83.2 |
| TcMYB50 | ATMYB4   | 74.67 | 150 | 28  | 1 | 1   | 420 | 1  | 150 | 1.00E-77 | 235  |
| TcMYB50 | AtMYB6   | 85.34 | 116 | 17  | 0 | 1   | 348 | 1  | 116 | 3.00E-73 | 222  |
| TcMYB50 | AtMYB32  | 70    | 150 | 44  | 2 | 1   | 447 | 1  | 147 | 7.00E-73 | 223  |
| TcMYB50 | ATMYB3   | 72.41 | 145 | 40  | 1 | 1   | 435 | 1  | 142 | 2.00E-72 | 221  |
| TcMYB50 | MYB7     | 84.48 | 116 | 18  | 0 | 1   | 348 | 1  | 116 | 5.00E-72 | 220  |
| TcMYB50 | MYB8     | 78.45 | 116 | 25  | 0 | 1   | 348 | 1  | 116 | 5.00E-68 | 208  |
| TcMYB50 | AtMYB107 | 44.12 | 238 | 130 | 3 | 1   | 705 | 1  | 225 | 3.00E-60 | 191  |
| TcMYB50 | AtMYB9   | 72.41 | 116 | 32  | 0 | 1   | 348 | 1  | 116 | 5.00E-60 | 191  |
| TcMYB50 | AtMYB41  | 59.72 | 144 | 58  | 0 | 1   | 432 | 1  | 144 | 1.00E-58 | 186  |
| TcMYB50 | AtMYB74  | 42.13 | 254 | 143 | 4 | 1   | 750 | 1  | 253 | 4.00E-58 | 186  |
| TcMYB50 | AtMYB93  | 37.9  | 314 | 184 | 8 | 1   | 909 | 1  | 290 | 2.00E-57 | 186  |
| TcMYB50 | ATMYB61  | 55.9  | 161 | 68  | 1 | 1   | 474 | 1  | 161 | 2.00E-57 | 186  |
| TcMYB50 | ATMYB111 | 55.76 | 165 | 68  | 2 | 1   | 480 | 1  | 164 | 3.00E-57 | 184  |
| TcMYB50 | AtMYB42  | 57.14 | 154 | 60  | 1 | 1   | 444 | 1  | 154 | 1.00E-56 | 181  |
| TcMYB50 | ATMYB102 | 37.42 | 310 | 178 | 4 | 1   | 882 | 1  | 306 | 1.00E-56 | 183  |
| TcMYB50 | ATMYB15  | 49.44 | 180 | 81  | 2 | 1   | 510 | 1  | 180 | 6.00E-56 | 179  |
| TcMYB50 | AtMYB43  | 44.64 | 224 | 117 | 3 | 1   | 651 | 1  | 214 | 7.00E-56 | 180  |
| TcMYB50 | ATMYB12  | 69.83 | 116 | 35  | 0 | 1   | 348 | 1  | 116 | 2.00E-55 | 180  |
| TcMYB50 | ATMYB13  | 49.47 | 188 | 81  | 3 | 1   | 522 | 1  | 181 | 4.00E-55 | 176  |
| TcMYB50 | ATMYB58  | 58.33 | 144 | 59  | 1 | 4   | 432 | 4  | 147 | 5.00E-55 | 176  |
| TcMYB50 | AtMYB17  | 65.52 | 116 | 40  | 0 | 1   | 348 | 1  | 116 | 5.00E-55 | 177  |
| TcMYB50 | AtMYB50  | 56.58 | 152 | 66  | 1 | 1   | 456 | 1  | 148 | 5.00E-55 | 177  |
| TcMYB50 | ATMYB34  | 45.16 | 217 | 117 | 4 | 1   | 645 | 1  | 201 | 6.00E-55 | 177  |
| TcMYB50 | AtMYB49  | 36.42 | 324 | 171 | 8 | 1   | 867 | 1  | 305 | 8.00E-55 | 177  |
| TcMYB50 | ATMYB16  | 66.95 | 118 | 39  | 0 | 1   | 354 | 1  | 118 | 1.00E-54 | 177  |
| TcMYB50 | ATMYB86  | 67.8  | 118 | 38  | 0 | 1   | 354 | 1  | 118 | 1.00E-54 | 177  |
| TcMYB50 | ATMYB63  | 62.99 | 127 | 47  | 0 | 4   | 384 | 4  | 130 | 2.00E-54 | 176  |
| TcMYB50 | AtMYB85  | 67.8  | 118 | 38  | 0 | 1   | 354 | 1  | 118 | 2.00E-54 | 174  |
| TcMYB50 | ATMYB106 | 59.85 | 137 | 55  | 0 | 10  | 420 | 47 | 183 | 2.00E-54 | 178  |
| TcMYB50 | ATMYB30  | 55.48 | 146 | 65  | 0 | 1   | 438 | 1  | 146 | 5.00E-54 | 175  |
| TcMYB50 | ATMYB5   | 65.22 | 115 | 40  | 0 | 10  | 354 | 15 | 129 | 7.00E-54 | 172  |
| TcMYB50 | AtMYB60  | 57.14 | 140 | 60  | 0 | 1   | 420 | 1  | 140 | 2.00E-53 | 172  |
| TcMYB50 | ATMYB80  | 64.1  | 117 | 42  | 0 | 1   | 351 | 1  | 117 | 3.00E-53 | 173  |
| TcMYB50 | ATMYB72  | 47.51 | 181 | 95  | 1 | 4   | 546 | 4  | 183 | 3.00E-53 | 172  |
| TcMYB50 | AtMYB103 | 62.71 | 118 | 44  | 0 | 1   | 354 | 1  | 118 | 3.00E-53 | 174  |
| TcMYB50 | ATMYB14  | 63.56 | 118 | 43  | 0 | 1   | 354 | 1  | 118 | 4.00E-53 | 171  |
| TcMYB50 | ATMYB29  | 49.16 | 179 | 73  | 2 | 1   | 483 | 1  | 179 | 7.00E-53 | 172  |
| TcMYB50 | ATMYB67  | 52.44 | 164 | 72  | 3 | 16  | 489 | 16 | 175 | 1.00E-52 | 171  |
| TcMYB50 | ATMYB94  | 52.83 | 159 | 75  | 2 | 1   | 477 | 1  | 155 | 1.00E-52 | 172  |
| TcMYB50 | ATMYB11  | 66.38 | 116 | 39  | 0 | 1   | 348 | 1  | 116 | 1.00E-52 | 172  |
| TcMYB50 | AtMYB20  | 64.41 | 118 | 42  | 0 | 1   | 354 | 1  | 118 | 1.00E-52 | 170  |
| TcMYB50 | ATMYB96  | 57.53 | 146 | 54  | 1 | 1   | 414 | 1  | 146 | 2.00E-52 | 172  |
| TcMYB50 | AtMYB53  | 65.52 | 116 | 40  | 0 | 1   | 348 | 1  | 116 | 3.00E-52 | 170  |
| TcMYB50 | AtMYB10  | 53.85 | 143 | 65  | 1 | 7   | 432 | 5  | 147 | 6.00E-52 | 167  |
| TcMYB50 | ATMYB122 | 63.56 | 118 | 43  | 0 | 1   | 354 | 1  | 118 | 1.00E-51 | 169  |
| TcMYB50 | ATMYB31  | 54.79 | 146 | 66  | 1 | 1   | 438 | 1  | 144 | 2.00E-51 | 169  |
| TcMYB50 | ATMYB35  | 52.78 | 144 | 68  | 0 | 1   | 432 | 1  | 144 | 2.00E-51 | 168  |
| TcMYB50 | ATMYB92  | 51.03 | 145 | 71  | 0 | 1   | 435 | 1  | 145 | 2.00E-51 | 169  |
| TcMYB50 | AtMYB51  | 65.55 | 119 | 40  | 1 | 1   | 354 | 1  | 119 | 2.00E-51 | 169  |
| TcMYB50 | ATMYB37  | 36.33 | 278 | 154 | 4 | 1   | 765 | 1  | 277 | 5.00E-51 | 167  |
| TcMYB50 | AtMYB36  | 41.13 | 231 | 121 | 6 | 1   | 648 | 1  | 225 | 8.00E-51 | 167  |
| TcMYB50 | ATMYB99  | 55.86 | 145 | 55  | 2 | 4   | 411 | 3  | 147 | 1.00E-50 | 164  |
| TcMYB50 | ATMYB46  | 48.35 | 182 | 94  | 2 | 40  | 585 | 20 | 178 | 2.00E-50 | 164  |
| TcMYB50 | ATMYB55  | 60.94 | 128 | 38  | 1 | 1   | 348 | 1  | 128 | 6.00E-50 | 165  |
| TcMYB50 | ATMYB28  | 62.93 | 116 | 43  | 0 | 1   | 348 | 1  | 116 | 7.00E-50 | 166  |
| TcMYB50 | ATMYB68  | 47.67 | 172 | 85  | 3 | 1   | 501 | 1  | 172 | 8.00E-50 | 166  |
| TcMYB50 | ATMYB84  | 52.82 | 142 | 64  | 2 | 1   | 417 | 1  | 142 | 1.00E-49 | 163  |
| TcMYB50 | ATMYB123 | 67.89 | 109 | 35  | 0 | 37  | 363 | 15 | 123 | 2.00E-49 | 161  |
| TcMYB50 | AtMYB40  | 62.07 | 116 | 44  | 0 | 1   | 348 | 1  | 116 | 5.00E-49 | 160  |
| TcMYB50 | ATMYB95  | 49.08 | 163 | 83  | 1 | 1   | 489 | 1  | 161 | 7.00E-49 | 160  |
| TcMYB50 | ATMYB26  | 60    | 125 | 41  | 1 | 1   | 348 | 1  | 125 | 7.00E-49 | 163  |
| TcMYB50 | AtMYB76  | 47.8  | 182 | 91  | 4 | 1   | 534 | 1  | 173 | 2.00E-48 | 161  |
| TcMYB50 | AtMYB83  | 58.33 | 120 | 50  | 0 | 25  | 384 | 27 | 146 | 3.00E-48 | 160  |
| TcMYB50 | ATMYB87  | 50.34 | 145 | 71  | 1 | 1   | 432 | 1  | 145 | 3.00E-48 | 159  |
| TcMYB50 | AtMYB19  | 46.45 | 183 | 93  | 3 | 25  | 558 | 9  | 187 | 1.00E-46 | 154  |
| TcMYB50 | ATMYB66  | 63.11 | 103 | 38  | 0 | 40  | 348 | 18 | 120 | 1.00E-46 | 152  |
| TcMYB50 | ATMYB23  | 56.52 | 115 | 50  | 0 | 40  | 384 | 14 | 128 | 2.00E-46 | 152  |
| TcMYB50 | ATMYB38  | 44.58 | 166 | 76  | 2 | 1   | 450 | 1  | 166 | 8.00E-46 | 153  |

|         |           |       |     |     |   |    |     |     |     |          |      |
|---------|-----------|-------|-----|-----|---|----|-----|-----|-----|----------|------|
| TcMYB50 | AtMYB47   | 44.97 | 169 | 91  | 1 | 1  | 501 | 1   | 169 | 1.00E-44 | 149  |
| TcMYB50 | ATMYB0    | 46.58 | 146 | 73  | 1 | 22 | 444 | 10  | 155 | 3.00E-44 | 147  |
| TcMYB50 | ATMYB90   | 47.5  | 160 | 82  | 2 | 40 | 513 | 10  | 166 | 1.00E-43 | 145  |
| TcMYB50 | AtMYB114  | 61.76 | 102 | 39  | 0 | 40 | 345 | 10  | 111 | 2.00E-43 | 141  |
| TcMYB50 | AtMYB82   | 57.94 | 107 | 45  | 0 | 25 | 345 | 9   | 115 | 3.00E-43 | 143  |
| TcMYB50 | AtMYB79   | 56.2  | 121 | 53  | 1 | 40 | 402 | 8   | 126 | 4.00E-43 | 145  |
| TcMYB50 | ATMYB3    | 45.52 | 145 | 79  | 0 | 4  | 438 | 10  | 154 | 4.00E-42 | 141  |
| TcMYB50 | AtMYB18   | 42.93 | 184 | 86  | 2 | 40 | 534 | 12  | 195 | 5.00E-42 | 142  |
| TcMYB50 | AtMYB112  | 46.79 | 156 | 77  | 3 | 40 | 489 | 34  | 189 | 9.00E-42 | 140  |
| TcMYB50 | AtMYB24   | 45.86 | 157 | 83  | 2 | 40 | 504 | 19  | 175 | 1.00E-41 | 139  |
| TcMYB50 | ATMYB57   | 59.63 | 109 | 44  | 0 | 22 | 348 | 21  | 129 | 1.00E-41 | 139  |
| TcMYB50 | ATMYB71   | 55.37 | 121 | 54  | 2 | 40 | 402 | 20  | 138 | 1.00E-41 | 141  |
| TcMYB50 | AtMYB45   | 47.55 | 143 | 69  | 2 | 25 | 435 | 15  | 157 | 1.00E-41 | 140  |
| TcMYB50 | ATMYB75   | 60.78 | 102 | 40  | 0 | 40 | 345 | 10  | 111 | 2.00E-41 | 140  |
| TcMYB50 | AtMYB113  | 38.5  | 200 | 114 | 3 | 1  | 573 | 1   | 186 | 4.00E-41 | 139  |
| TcMYB50 | ATMYB101  | 31.08 | 325 | 190 | 8 | 40 | 912 | 20  | 335 | 1.00E-40 | 143  |
| TcMYB50 | ATMYB121  | 48.55 | 138 | 68  | 1 | 40 | 444 | 29  | 166 | 3.00E-40 | 137  |
| TcMYB50 | AtMYB81   | 55.66 | 106 | 47  | 0 | 25 | 342 | 17  | 122 | 7.00E-40 | 140  |
| TcMYB50 | AtMYB97   | 59.41 | 101 | 41  | 0 | 40 | 342 | 21  | 121 | 2.00E-39 | 138  |
| TcMYB50 | ATMYB120  | 59.22 | 103 | 42  | 0 | 40 | 348 | 28  | 130 | 4.00E-39 | 140  |
| TcMYB50 | ATMYB33   | 56.86 | 102 | 44  | 0 | 40 | 345 | 34  | 135 | 5.00E-39 | 139  |
| TcMYB50 | AtMYB108  | 52.94 | 119 | 56  | 0 | 40 | 396 | 21  | 139 | 9.00E-39 | 135  |
| TcMYB50 | ATMYB2    | 48.8  | 125 | 64  | 0 | 22 | 396 | 16  | 140 | 1.00E-38 | 133  |
| TcMYB50 | ATMYB65   | 56.86 | 102 | 44  | 0 | 40 | 345 | 43  | 144 | 2.00E-38 | 138  |
| TcMYB50 | AtMYB62   | 38.92 | 203 | 109 | 4 | 22 | 585 | 15  | 212 | 4.00E-38 | 132  |
| TcMYB50 | AtMYB116  | 50.85 | 118 | 58  | 0 | 22 | 375 | 14  | 131 | 2.00E-37 | 130  |
| TcMYB50 | AtMYB27   | 59.8  | 102 | 41  | 0 | 40 | 345 | 11  | 112 | 3.00E-37 | 128  |
| TcMYB50 | ATMYB59-3 | 42.28 | 149 | 81  | 1 | 40 | 471 | 10  | 158 | 8.00E-37 | 127  |
| TcMYB50 | ATMYB78   | 33.62 | 232 | 112 | 4 | 22 | 591 | 22  | 252 | 6.00E-36 | 127  |
| TcMYB50 | ATMYB48   | 46.51 | 129 | 64  | 1 | 40 | 411 | 9   | 137 | 1.00E-35 | 124  |
| TcMYB50 | AtMYB115  | 41.01 | 139 | 81  | 3 | 22 | 435 | 152 | 288 | 9.00E-30 | 111  |
| TcMYB50 | ATMYB119  | 45.22 | 115 | 62  | 2 | 40 | 381 | 105 | 217 | 4.00E-29 | 110  |
| TcMYB50 | AtMYB104  | 47.57 | 103 | 54  | 1 | 22 | 330 | 13  | 114 | 8.00E-29 | 108  |
| TcMYB50 | AtMYB1    | 28.81 | 302 | 201 | 9 | 40 | 903 | 55  | 334 | 5.00E-28 | 107  |
| TcMYB50 | ATMYB77   | 37.34 | 158 | 90  | 3 | 40 | 486 | 6   | 162 | 1.00E-27 | 104  |
| TcMYB50 | AtMYB64   | 39.6  | 149 | 76  | 5 | 40 | 444 | 105 | 249 | 1.00E-27 | 106  |
| TcMYB50 | ATMYB73   | 50    | 102 | 51  | 1 | 40 | 345 | 13  | 113 | 1.00E-27 | 104  |
| TcMYB50 | ATMYB25   | 49.52 | 105 | 53  | 1 | 40 | 354 | 50  | 153 | 2.00E-27 | 105  |
| TcMYB50 | ATMYB118  | 39.87 | 153 | 90  | 4 | 22 | 474 | 183 | 331 | 3.00E-27 | 105  |
| TcMYB50 | AtMYB98   | 39.71 | 136 | 82  | 2 | 22 | 429 | 211 | 343 | 6.00E-27 | 104  |
| TcMYB50 | AtMYB70   | 49.02 | 102 | 52  | 1 | 40 | 345 | 13  | 113 | 8.00E-27 | 102  |
| TcMYB50 | AtMYB109  | 43.59 | 156 | 87  | 5 | 40 | 504 | 56  | 198 | 1.00E-26 | 103  |
| TcMYB50 | ATMYB54   | 38.17 | 131 | 80  | 3 | 37 | 426 | 5   | 125 | 3.00E-25 | 96.3 |
| TcMYB50 | AtMYB117  | 38.26 | 149 | 88  | 4 | 40 | 474 | 98  | 240 | 3.00E-25 | 98.6 |
| TcMYB50 | ATMYB44   | 47.06 | 102 | 54  | 1 | 40 | 345 | 6   | 106 | 6.00E-25 | 96.7 |
| TcMYB50 | ATMYB105  | 37.76 | 143 | 88  | 4 | 25 | 450 | 102 | 233 | 2.00E-24 | 95.5 |
| TcMYB50 | AtMYB100  | 35.25 | 139 | 90  | 2 | 22 | 438 | 20  | 155 | 4.00E-23 | 90.1 |
| TcMYB50 | ATMYB52   | 43.88 | 98  | 54  | 2 | 37 | 327 | 4   | 99  | 9.00E-23 | 89.4 |
| TcMYB50 | ATMYB69   | 29.45 | 163 | 115 | 2 | 7  | 495 | 13  | 169 | 1.00E-21 | 86.3 |
| TcMYB50 | ATMYB110  | 36.36 | 110 | 70  | 1 | 37 | 366 | 66  | 174 | 4.00E-21 | 85.9 |
| TcMYB50 | ATMYB91   | 34.29 | 140 | 85  | 2 | 49 | 447 | 7   | 146 | 5.00E-21 | 86.3 |
| TcMYB50 | AtMYB22   | 31.21 | 141 | 97  | 2 | 22 | 444 | 48  | 184 | 8.00E-21 | 84   |
| TcMYB50 | AtMYB89   | 37.04 | 108 | 68  | 1 | 43 | 366 | 57  | 163 | 5.00E-20 | 80.1 |
| TcMYB50 | AtMYB56   | 37.04 | 108 | 68  | 1 | 37 | 360 | 92  | 198 | 1.00E-19 | 82   |
| TcMYB50 | AtMYB124  | 33.08 | 133 | 89  | 1 | 49 | 447 | 28  | 159 | 1.00E-18 | 79.7 |
| TcMYB50 | ATMYB88   | 40.4  | 99  | 59  | 1 | 49 | 345 | 33  | 130 | 8.00E-18 | 77.4 |
| TcMYB51 | ATMYB3    | 58.33 | 168 | 66  | 2 | 1  | 492 | 1   | 167 | 7.00E-64 | 197  |
| TcMYB51 | AtMYB6    | 52.91 | 189 | 87  | 3 | 1  | 561 | 1   | 178 | 4.00E-63 | 194  |
| TcMYB51 | ATMYB12   | 72.65 | 117 | 32  | 1 | 1  | 351 | 1   | 116 | 1.00E-60 | 192  |
| TcMYB51 | ATMYB4    | 63.57 | 140 | 51  | 1 | 1  | 420 | 1   | 139 | 1.00E-60 | 189  |
| TcMYB51 | ATMYB111  | 51.04 | 192 | 74  | 3 | 1  | 516 | 1   | 190 | 1.00E-59 | 189  |
| TcMYB51 | AtMYB32   | 60.42 | 144 | 57  | 1 | 1  | 432 | 1   | 143 | 1.00E-59 | 186  |
| TcMYB51 | MYB7      | 59.46 | 148 | 60  | 1 | 1  | 444 | 1   | 147 | 2.00E-59 | 186  |
| TcMYB51 | MYB8      | 49.49 | 196 | 97  | 4 | 1  | 582 | 1   | 182 | 4.00E-59 | 183  |
| TcMYB51 | ATMYB5    | 68.6  | 121 | 38  | 1 | 13 | 375 | 16  | 135 | 5.00E-58 | 181  |
| TcMYB51 | ATMYB123  | 58.97 | 156 | 64  | 2 | 7  | 474 | 4   | 148 | 7.00E-58 | 181  |
| TcMYB51 | AtMYB74   | 69.23 | 117 | 36  | 0 | 1  | 351 | 1   | 117 | 8.00E-58 | 183  |
| TcMYB51 | ATMYB11   | 69.23 | 117 | 36  | 1 | 1  | 351 | 1   | 116 | 2.00E-57 | 183  |
| TcMYB51 | AtMYB41   | 38.57 | 293 | 161 | 7 | 1  | 822 | 1   | 280 | 4.00E-57 | 180  |
| TcMYB51 | ATMYB34   | 61.03 | 136 | 53  | 1 | 1  | 408 | 1   | 135 | 4.00E-57 | 181  |
| TcMYB51 | ATMYB13   | 46    | 200 | 103 | 4 | 1  | 585 | 1   | 195 | 8.00E-57 | 178  |
| TcMYB51 | ATMYB15   | 60.14 | 138 | 55  | 1 | 1  | 414 | 1   | 137 | 3.00E-56 | 178  |
| TcMYB51 | AtMYB9    | 37.96 | 274 | 153 | 6 | 1  | 771 | 1   | 269 | 7.00E-56 | 179  |
| TcMYB51 | ATMYB14   | 60.77 | 130 | 51  | 1 | 1  | 390 | 1   | 129 | 1.00E-55 | 175  |
| TcMYB51 | AtMYB51   | 68.38 | 117 | 37  | 0 | 1  | 351 | 1   | 117 | 1.00E-55 | 178  |
| TcMYB51 | ATMYB102  | 39.32 | 295 | 152 | 8 | 1  | 804 | 1   | 284 | 3.00E-55 | 177  |
| TcMYB51 | AtMYB107  | 67.52 | 117 | 38  | 1 | 1  | 351 | 1   | 116 | 5.00E-55 | 176  |
| TcMYB51 | ATMYB16   | 70.09 | 117 | 35  | 1 | 1  | 351 | 1   | 116 | 4.00E-54 | 174  |
| TcMYB51 | AtMYB82   | 53.25 | 154 | 60  | 2 | 19 | 444 | 3   | 156 | 5.00E-54 | 169  |
| TcMYB51 | ATMYB29   | 68.38 | 117 | 37  | 1 | 1  | 351 | 1   | 116 | 4.00E-53 | 171  |

|         |           |       |     |     |   |     |     |     |     |          |      |
|---------|-----------|-------|-----|-----|---|-----|-----|-----|-----|----------|------|
| TcMYB51 | ATMYB28   | 65.29 | 121 | 42  | 1 | 1   | 363 | 1   | 120 | 1.00E-52 | 171  |
| TcMYB51 | ATMYB106  | 63.85 | 130 | 41  | 2 | 10  | 381 | 47  | 175 | 2.00E-52 | 171  |
| TcMYB51 | ATMYB86   | 38.95 | 285 | 158 | 7 | 1   | 807 | 1   | 277 | 2.00E-52 | 170  |
| TcMYB51 | ATMYB80   | 61.98 | 121 | 46  | 1 | 1   | 363 | 1   | 120 | 3.00E-52 | 169  |
| TcMYB51 | AtMYB17   | 65.81 | 117 | 40  | 1 | 1   | 351 | 1   | 116 | 3.00E-52 | 168  |
| TcMYB51 | AtMYB114  | 69.16 | 107 | 33  | 0 | 34  | 354 | 7   | 113 | 4.00E-52 | 162  |
| TcMYB51 | ATMYB92   | 65.81 | 117 | 40  | 1 | 1   | 351 | 1   | 116 | 4.00E-52 | 169  |
| TcMYB51 | ATMYB122  | 64.46 | 121 | 43  | 1 | 1   | 363 | 1   | 120 | 6.00E-52 | 168  |
| TcMYB51 | AtMYB60   | 43.44 | 221 | 122 | 6 | 1   | 654 | 1   | 202 | 8.00E-52 | 166  |
| TcMYB51 | ATMYB66   | 60.16 | 123 | 46  | 1 | 22  | 381 | 8   | 130 | 1.00E-51 | 164  |
| TcMYB51 | AtMYB85   | 64.96 | 117 | 41  | 1 | 1   | 351 | 1   | 116 | 2.00E-51 | 165  |
| TcMYB51 | AtMYB93   | 64.96 | 117 | 41  | 1 | 1   | 351 | 1   | 116 | 5.00E-51 | 167  |
| TcMYB51 | AtMYB42   | 49.44 | 180 | 88  | 3 | 1   | 531 | 1   | 170 | 5.00E-51 | 164  |
| TcMYB51 | ATMYB23   | 61.21 | 116 | 45  | 1 | 25  | 372 | 8   | 122 | 9.00E-51 | 162  |
| TcMYB51 | ATMYB61   | 63.64 | 121 | 44  | 1 | 1   | 363 | 1   | 120 | 1.00E-50 | 166  |
| TcMYB51 | ATMYB63   | 51.95 | 154 | 73  | 2 | 4   | 462 | 4   | 156 | 1.00E-50 | 164  |
| TcMYB51 | ATMYB72   | 38.74 | 253 | 148 | 5 | 4   | 741 | 4   | 238 | 1.00E-50 | 164  |
| TcMYB51 | AtMYB76   | 64.1  | 117 | 42  | 1 | 1   | 351 | 1   | 116 | 2.00E-50 | 164  |
| TcMYB51 | ATMYB90   | 68.81 | 109 | 34  | 0 | 34  | 360 | 7   | 115 | 2.00E-50 | 162  |
| TcMYB51 | AtMYB20   | 40.71 | 226 | 130 | 4 | 1   | 666 | 1   | 224 | 3.00E-50 | 162  |
| TcMYB51 | ATMYB75   | 67.29 | 107 | 35  | 0 | 34  | 354 | 7   | 113 | 3.00E-50 | 161  |
| TcMYB51 | ATMYB35   | 61.54 | 117 | 45  | 1 | 1   | 351 | 1   | 116 | 3.00E-50 | 163  |
| TcMYB51 | AtMYB36   | 63.56 | 118 | 42  | 2 | 1   | 351 | 1   | 117 | 3.00E-50 | 164  |
| TcMYB51 | ATMYB94   | 53.33 | 150 | 68  | 2 | 1   | 444 | 1   | 149 | 5.00E-50 | 163  |
| TcMYB51 | ATMYB96   | 51.97 | 152 | 61  | 2 | 1   | 420 | 1   | 151 | 5.00E-50 | 164  |
| TcMYB51 | AtMYB49   | 68.18 | 110 | 35  | 0 | 22  | 351 | 7   | 116 | 7.00E-50 | 162  |
| TcMYB51 | ATMYB99   | 44.79 | 192 | 93  | 5 | 4   | 540 | 3   | 190 | 1.00E-49 | 160  |
| TcMYB51 | ATMYB84   | 64.41 | 118 | 41  | 2 | 1   | 351 | 1   | 117 | 1.00E-49 | 162  |
| TcMYB51 | ATMYB71   | 55.56 | 135 | 58  | 1 | 28  | 426 | 15  | 149 | 2.00E-49 | 160  |
| TcMYB51 | AtMYB103  | 60.16 | 123 | 49  | 1 | 1   | 369 | 1   | 122 | 2.00E-49 | 162  |
| TcMYB51 | AtMYB113  | 62.07 | 116 | 44  | 1 | 1   | 348 | 1   | 111 | 3.00E-49 | 159  |
| TcMYB51 | ATMYB58   | 50    | 158 | 69  | 2 | 4   | 447 | 4   | 160 | 3.00E-49 | 159  |
| TcMYB51 | AtMYB50   | 53.06 | 147 | 69  | 1 | 1   | 441 | 1   | 146 | 3.00E-49 | 160  |
| TcMYB51 | AtMYB53   | 64.1  | 117 | 42  | 1 | 1   | 351 | 1   | 116 | 4.00E-49 | 160  |
| TcMYB51 | ATMYB0    | 61.95 | 113 | 43  | 0 | 43  | 381 | 16  | 128 | 5.00E-49 | 157  |
| TcMYB51 | AtMYB43   | 61.98 | 121 | 46  | 1 | 1   | 363 | 1   | 120 | 6.00E-49 | 160  |
| TcMYB51 | ATMYB87   | 53.74 | 147 | 62  | 4 | 1   | 423 | 1   | 146 | 7.00E-49 | 159  |
| TcMYB51 | ATMYB37   | 59.38 | 128 | 51  | 2 | 1   | 381 | 1   | 127 | 9.00E-49 | 160  |
| TcMYB51 | ATMYB68   | 62.71 | 118 | 43  | 2 | 1   | 351 | 1   | 117 | 1.00E-48 | 160  |
| TcMYB51 | ATMYB30   | 52.35 | 149 | 69  | 2 | 1   | 441 | 1   | 148 | 2.00E-48 | 159  |
| TcMYB51 | ATMYB31   | 62.39 | 117 | 44  | 1 | 1   | 351 | 1   | 116 | 5.00E-48 | 158  |
| TcMYB51 | AtMYB79   | 56.92 | 130 | 54  | 1 | 43  | 426 | 8   | 137 | 7.00E-48 | 155  |
| TcMYB51 | ATMYB3    | 54.74 | 137 | 54  | 1 | 22  | 408 | 15  | 151 | 7.00E-48 | 154  |
| TcMYB51 | ATMYB67   | 46.39 | 166 | 89  | 3 | 16  | 513 | 16  | 174 | 1.00E-47 | 156  |
| TcMYB51 | AtMYB24   | 53.52 | 142 | 65  | 2 | 22  | 444 | 12  | 149 | 1.00E-47 | 153  |
| TcMYB51 | ATMYB55   | 58.65 | 133 | 43  | 2 | 1   | 363 | 1   | 132 | 2.00E-47 | 157  |
| TcMYB51 | ATMYB95   | 61.98 | 121 | 46  | 1 | 1   | 363 | 1   | 120 | 2.00E-47 | 154  |
| TcMYB51 | AtMYB83   | 33.33 | 324 | 198 | 6 | 37  | 954 | 30  | 323 | 3.00E-47 | 156  |
| TcMYB51 | ATMYB38   | 61.02 | 118 | 45  | 2 | 1   | 351 | 1   | 117 | 5.00E-47 | 154  |
| TcMYB51 | ATMYB46   | 55.65 | 124 | 55  | 1 | 37  | 408 | 18  | 137 | 9.00E-47 | 153  |
| TcMYB51 | AtMYB40   | 59.5  | 121 | 49  | 1 | 1   | 363 | 1   | 120 | 1.00E-46 | 152  |
| TcMYB51 | AtMYB10   | 54.29 | 140 | 60  | 3 | 7   | 414 | 5   | 143 | 2.00E-46 | 151  |
| TcMYB51 | ATMYB121  | 55.73 | 131 | 58  | 2 | 34  | 426 | 26  | 149 | 4.00E-46 | 151  |
| TcMYB51 | AtMYB47   | 43.82 | 178 | 100 | 1 | 1   | 534 | 1   | 177 | 7.00E-46 | 150  |
| TcMYB51 | ATMYB57   | 55.65 | 115 | 51  | 0 | 25  | 369 | 21  | 135 | 1.00E-45 | 148  |
| TcMYB51 | AtMYB112  | 50.34 | 147 | 61  | 2 | 37  | 441 | 32  | 178 | 1.00E-45 | 149  |
| TcMYB51 | ATMYB26   | 52.52 | 139 | 57  | 2 | 1   | 390 | 1   | 138 | 3.00E-45 | 152  |
| TcMYB51 | ATMYB2    | 55.75 | 113 | 50  | 0 | 10  | 348 | 11  | 123 | 6.00E-45 | 148  |
| TcMYB51 | AtMYB62   | 61.47 | 109 | 42  | 0 | 22  | 348 | 14  | 122 | 3.00E-44 | 147  |
| TcMYB51 | ATMYB101  | 58.1  | 105 | 44  | 0 | 34  | 348 | 17  | 121 | 9.00E-44 | 150  |
| TcMYB51 | AtMYB108  | 64.08 | 103 | 37  | 0 | 37  | 345 | 19  | 121 | 1.00E-42 | 144  |
| TcMYB51 | AtMYB116  | 60.78 | 102 | 40  | 0 | 43  | 348 | 20  | 121 | 2.00E-42 | 142  |
| TcMYB51 | AtMYB97   | 58.42 | 101 | 42  | 0 | 37  | 339 | 19  | 119 | 6.00E-41 | 140  |
| TcMYB51 | ATMYB120  | 58.1  | 105 | 44  | 0 | 37  | 351 | 26  | 130 | 1.00E-40 | 142  |
| TcMYB51 | ATMYB48   | 47.66 | 128 | 67  | 0 | 25  | 408 | 3   | 130 | 1.00E-40 | 136  |
| TcMYB51 | AtMYB81   | 57.01 | 107 | 46  | 1 | 43  | 363 | 22  | 127 | 3.00E-40 | 139  |
| TcMYB51 | ATMYB33   | 45.32 | 139 | 70  | 1 | 37  | 435 | 32  | 170 | 7.00E-40 | 140  |
| TcMYB51 | AtMYB27   | 58.18 | 110 | 46  | 0 | 25  | 354 | 5   | 114 | 9.00E-40 | 134  |
| TcMYB51 | ATMYB59-3 | 54.81 | 104 | 47  | 0 | 43  | 354 | 10  | 113 | 2.00E-39 | 133  |
| TcMYB51 | AtMYB18   | 52.42 | 124 | 59  | 1 | 43  | 414 | 12  | 134 | 5.00E-39 | 133  |
| TcMYB51 | ATMYB78   | 54.55 | 121 | 41  | 1 | 25  | 345 | 22  | 142 | 1.00E-38 | 133  |
| TcMYB51 | ATMYB65   | 50.93 | 108 | 53  | 0 | 25  | 348 | 37  | 144 | 2.00E-38 | 137  |
| TcMYB51 | AtMYB19   | 58.82 | 102 | 42  | 0 | 43  | 348 | 14  | 115 | 3.00E-38 | 130  |
| TcMYB51 | AtMYB45   | 52.48 | 101 | 48  | 0 | 43  | 345 | 20  | 120 | 1.00E-35 | 123  |
| TcMYB51 | AtMYB104  | 44.9  | 98  | 54  | 0 | 43  | 336 | 18  | 115 | 1.00E-30 | 112  |
| TcMYB51 | ATMYB118  | 34.22 | 187 | 115 | 5 | 22  | 558 | 182 | 361 | 4.00E-29 | 109  |
| TcMYB51 | AtMYB117  | 44.04 | 109 | 61  | 1 | 22  | 348 | 91  | 198 | 4.00E-28 | 105  |
| TcMYB51 | ATMYB73   | 46.73 | 107 | 57  | 1 | 43  | 363 | 13  | 118 | 6.00E-28 | 104  |
| TcMYB51 | ATMYB73   | 34.85 | 66  | 42  | 1 | 202 | 396 | 13  | 78  | 8.00E-06 | 39.3 |
| TcMYB51 | ATMYB105  | 40.87 | 115 | 68  | 1 | 22  | 366 | 100 | 213 | 1.00E-27 | 103  |

|         |          |       |     |     |    |     |      |     |     |          |      |
|---------|----------|-------|-----|-----|----|-----|------|-----|-----|----------|------|
| TcMYB51 | AtMYB98  | 47.57 | 103 | 54  | 1  | 22  | 330  | 210 | 311 | 8.00E-27 | 102  |
| TcMYB51 | AtMYB98  | 28.36 | 67  | 47  | 1  | 142 | 339  | 197 | 263 | 6.00E-04 | 33.5 |
| TcMYB51 | AtMYB115 | 32.78 | 180 | 121 | 5  | 37  | 576  | 156 | 320 | 2.00E-26 | 100  |
| TcMYB51 | AtMYB70  | 43.75 | 112 | 63  | 1  | 43  | 378  | 13  | 123 | 3.00E-26 | 99.4 |
| TcMYB51 | AtMYB70  | 35.94 | 64  | 40  | 1  | 202 | 390  | 13  | 76  | 8.00E-06 | 39.3 |
| TcMYB51 | ATMYB119 | 46.94 | 98  | 52  | 1  | 37  | 330  | 103 | 199 | 5.00E-26 | 100  |
| TcMYB51 | ATMYB119 | 27.42 | 62  | 44  | 1  | 202 | 384  | 105 | 166 | 4.00E-04 | 34.3 |
| TcMYB51 | AtMYB64  | 40.31 | 129 | 73  | 2  | 43  | 417  | 105 | 232 | 9.00E-26 | 99.8 |
| TcMYB51 | ATMYB77  | 39.1  | 133 | 81  | 3  | 43  | 441  | 6   | 133 | 2.00E-25 | 97.1 |
| TcMYB51 | ATMYB52  | 43.69 | 103 | 58  | 1  | 40  | 348  | 4   | 105 | 2.00E-25 | 95.9 |
| TcMYB51 | AtMYB100 | 41.75 | 103 | 60  | 1  | 25  | 333  | 20  | 121 | 4.00E-25 | 94.7 |
| TcMYB51 | ATMYB54  | 39.52 | 124 | 75  | 2  | 40  | 411  | 5   | 114 | 5.00E-25 | 94.7 |
| TcMYB51 | AtMYB1   | 46.23 | 106 | 53  | 2  | 43  | 348  | 55  | 155 | 6.00E-25 | 97.1 |
| TcMYB51 | AtMYB1   | 37.5  | 56  | 34  | 1  | 187 | 351  | 50  | 105 | 9.00E-05 | 36.2 |
| TcMYB51 | ATMYB25  | 46.08 | 102 | 55  | 1  | 43  | 348  | 50  | 150 | 9.00E-25 | 96.3 |
| TcMYB51 | ATMYB110 | 38.94 | 113 | 68  | 2  | 40  | 375  | 66  | 177 | 1.00E-24 | 94.7 |
| TcMYB51 | AtMYB109 | 40.32 | 124 | 74  | 1  | 43  | 414  | 56  | 178 | 2.00E-24 | 95.9 |
| TcMYB51 | ATMYB44  | 43.14 | 102 | 58  | 1  | 43  | 348  | 6   | 106 | 1.00E-23 | 92   |
| TcMYB51 | ATMYB44  | 33.33 | 66  | 43  | 1  | 202 | 396  | 6   | 71  | 3.00E-05 | 37.4 |
| TcMYB51 | AtMYB56  | 32.62 | 141 | 90  | 2  | 40  | 447  | 92  | 231 | 4.00E-23 | 90.9 |
| TcMYB51 | AtMYB124 | 39.13 | 115 | 70  | 1  | 52  | 396  | 28  | 141 | 2.00E-22 | 90.1 |
| TcMYB51 | ATMYB69  | 38.21 | 123 | 75  | 2  | 22  | 387  | 12  | 133 | 3.00E-22 | 87   |
| TcMYB51 | AtMYB89  | 40.62 | 96  | 57  | 1  | 46  | 333  | 57  | 151 | 2.00E-21 | 83.6 |
| TcMYB51 | ATMYB91  | 32.45 | 151 | 96  | 2  | 43  | 477  | 4   | 154 | 2.00E-21 | 86.7 |
| TcMYB51 | AtMYB22  | 32.23 | 121 | 82  | 1  | 25  | 387  | 48  | 166 | 3.00E-20 | 81.6 |
| TcMYB51 | ATMYB88  | 40.54 | 111 | 66  | 2  | 52  | 384  | 33  | 141 | 8.00E-20 | 82.8 |
| TcMYB52 | AtMYB83  | 71.13 | 142 | 41  | 1  | 22  | 447  | 27  | 164 | 2.00E-70 | 218  |
| TcMYB52 | ATMYB46  | 72.39 | 134 | 35  | 1  | 1   | 396  | 8   | 141 | 4.00E-68 | 209  |
| TcMYB52 | ATMYB86  | 40.65 | 310 | 156 | 8  | 22  | 867  | 9   | 290 | 1.00E-65 | 206  |
| TcMYB52 | AtMYB50  | 81.48 | 108 | 20  | 0  | 22  | 345  | 9   | 116 | 9.00E-63 | 197  |
| TcMYB52 | ATMYB61  | 79.82 | 109 | 22  | 0  | 22  | 348  | 9   | 117 | 1.00E-60 | 193  |
| TcMYB52 | ATMYB55  | 73.55 | 121 | 20  | 1  | 22  | 348  | 9   | 129 | 6.00E-59 | 188  |
| TcMYB52 | AtMYB103 | 33.92 | 342 | 170 | 8  | 28  | 885  | 11  | 350 | 3.00E-58 | 187  |
| TcMYB52 | ATMYB67  | 57.33 | 150 | 56  | 1  | 22  | 447  | 19  | 168 | 9.00E-57 | 181  |
| TcMYB52 | ATMYB26  | 69.67 | 122 | 28  | 1  | 22  | 360  | 9   | 130 | 6.00E-56 | 181  |
| TcMYB52 | AtMYB32  | 50.6  | 166 | 82  | 2  | 22  | 519  | 9   | 171 | 7.00E-53 | 170  |
| TcMYB52 | AtMYB9   | 34.24 | 295 | 175 | 5  | 31  | 858  | 12  | 302 | 1.00E-52 | 171  |
| TcMYB52 | AtMYB20  | 38.99 | 277 | 167 | 6  | 22  | 846  | 9   | 262 | 5.00E-52 | 168  |
| TcMYB52 | ATMYB106 | 37.83 | 267 | 156 | 5  | 22  | 792  | 52  | 292 | 5.00E-51 | 168  |
| TcMYB52 | ATMYB3   | 65.74 | 108 | 37  | 0  | 22  | 345  | 9   | 116 | 5.00E-51 | 164  |
| TcMYB52 | MYB7     | 65.74 | 108 | 37  | 0  | 22  | 345  | 9   | 116 | 1.00E-50 | 164  |
| TcMYB52 | ATMYB92  | 68.57 | 105 | 33  | 0  | 31  | 345  | 12  | 116 | 1.00E-50 | 166  |
| TcMYB52 | AtMYB53  | 69.52 | 105 | 32  | 0  | 31  | 345  | 12  | 116 | 1.00E-50 | 165  |
| TcMYB52 | AtMYB6   | 65.74 | 108 | 37  | 0  | 22  | 345  | 9   | 116 | 1.00E-50 | 163  |
| TcMYB52 | AtMYB107 | 69.52 | 105 | 32  | 0  | 31  | 345  | 12  | 116 | 2.00E-50 | 165  |
| TcMYB52 | AtMYB42  | 69.44 | 108 | 33  | 0  | 22  | 345  | 9   | 116 | 3.00E-50 | 163  |
| TcMYB52 | AtMYB74  | 68.18 | 110 | 35  | 0  | 16  | 345  | 8   | 117 | 9.00E-50 | 163  |
| TcMYB52 | ATMYB102 | 69.44 | 108 | 33  | 0  | 22  | 345  | 9   | 116 | 1.00E-49 | 164  |
| TcMYB52 | AtMYB93  | 34.4  | 375 | 226 | 14 | 31  | 1095 | 12  | 357 | 2.00E-49 | 163  |
| TcMYB52 | ATMYB4   | 64.81 | 108 | 38  | 0  | 22  | 345  | 9   | 116 | 3.00E-49 | 160  |
| TcMYB52 | ATMYB13  | 57.66 | 137 | 54  | 1  | 31  | 429  | 12  | 148 | 5.00E-49 | 159  |
| TcMYB52 | MYB8     | 56.25 | 128 | 50  | 1  | 22  | 387  | 9   | 136 | 9.00E-49 | 157  |
| TcMYB52 | AtMYB45  | 54.74 | 137 | 53  | 1  | 16  | 399  | 13  | 149 | 1.00E-48 | 158  |
| TcMYB52 | AtMYB85  | 68.57 | 105 | 33  | 0  | 31  | 345  | 12  | 116 | 2.00E-48 | 158  |
| TcMYB52 | AtMYB49  | 36.91 | 298 | 170 | 8  | 10  | 849  | 5   | 286 | 2.00E-48 | 160  |
| TcMYB52 | AtMYB43  | 66.97 | 109 | 36  | 0  | 22  | 348  | 9   | 117 | 4.00E-48 | 159  |
| TcMYB52 | ATMYB14  | 63.16 | 114 | 42  | 0  | 22  | 363  | 9   | 122 | 7.00E-48 | 156  |
| TcMYB52 | ATMYB95  | 46.91 | 162 | 75  | 1  | 31  | 483  | 12  | 173 | 1.00E-47 | 156  |
| TcMYB52 | AtMYB17  | 65.71 | 105 | 36  | 0  | 31  | 345  | 12  | 116 | 1.00E-47 | 157  |
| TcMYB52 | AtMYB19  | 46.49 | 185 | 96  | 3  | 22  | 567  | 9   | 183 | 2.00E-47 | 155  |
| TcMYB52 | AtMYB10  | 43.48 | 184 | 97  | 3  | 22  | 552  | 11  | 192 | 3.00E-47 | 154  |
| TcMYB52 | ATMYB12  | 54.23 | 142 | 60  | 2  | 22  | 432  | 9   | 149 | 8.00E-47 | 157  |
| TcMYB52 | AtMYB40  | 65.42 | 107 | 37  | 0  | 31  | 351  | 12  | 118 | 8.00E-47 | 154  |
| TcMYB52 | AtMYB41  | 64.81 | 108 | 38  | 0  | 22  | 345  | 9   | 116 | 1.00E-46 | 154  |
| TcMYB52 | ATMYB58  | 54.61 | 141 | 58  | 1  | 22  | 426  | 11  | 151 | 1.00E-46 | 154  |
| TcMYB52 | ATMYB80  | 62.04 | 108 | 41  | 0  | 22  | 345  | 9   | 116 | 1.00E-46 | 155  |
| TcMYB52 | AtMYB82  | 51.09 | 137 | 67  | 1  | 16  | 426  | 7   | 140 | 2.00E-46 | 151  |
| TcMYB52 | ATMYB23  | 51.08 | 139 | 67  | 1  | 1   | 414  | 1   | 139 | 2.00E-46 | 151  |
| TcMYB52 | ATMYB63  | 54.69 | 128 | 58  | 0  | 22  | 405  | 11  | 138 | 2.00E-46 | 154  |
| TcMYB52 | AtMYB18  | 47.06 | 170 | 89  | 2  | 34  | 540  | 11  | 177 | 4.00E-46 | 152  |
| TcMYB52 | ATMYB16  | 63.81 | 105 | 38  | 0  | 31  | 345  | 12  | 116 | 4.00E-46 | 154  |
| TcMYB52 | ATMYB71  | 61.4  | 114 | 44  | 0  | 34  | 375  | 19  | 132 | 5.00E-46 | 152  |
| TcMYB52 | AtMYB51  | 53.73 | 134 | 60  | 1  | 16  | 411  | 8   | 141 | 5.00E-46 | 154  |
| TcMYB52 | ATMYB72  | 59.17 | 120 | 49  | 0  | 22  | 381  | 11  | 130 | 5.00E-46 | 152  |
| TcMYB52 | ATMYB66  | 53.6  | 125 | 51  | 1  | 16  | 369  | 11  | 135 | 6.00E-46 | 149  |
| TcMYB52 | ATMYB34  | 61.32 | 106 | 41  | 0  | 31  | 348  | 12  | 117 | 7.00E-46 | 152  |
| TcMYB52 | ATMYB57  | 47.22 | 144 | 76  | 0  | 16  | 447  | 20  | 163 | 1.00E-45 | 149  |
| TcMYB52 | ATMYB99  | 62.5  | 112 | 35  | 1  | 31  | 345  | 13  | 124 | 2.00E-45 | 150  |
| TcMYB52 | AtMYB79  | 61.06 | 113 | 44  | 0  | 34  | 372  | 7   | 119 | 2.00E-45 | 150  |
| TcMYB52 | AtMYB47  | 39.9  | 203 | 98  | 3  | 31  | 567  | 12  | 214 | 2.00E-45 | 150  |

|         |           |       |     |     |   |    |     |     |     |          |      |
|---------|-----------|-------|-----|-----|---|----|-----|-----|-----|----------|------|
| TcMYB52 | ATMYB28   | 42.7  | 185 | 104 | 2 | 31 | 579 | 12  | 195 | 2.00E-45 | 153  |
| TcMYB52 | ATMYB3    | 51.91 | 131 | 63  | 0 | 13 | 405 | 14  | 144 | 3.00E-45 | 148  |
| TcMYB52 | ATMYB15   | 60.55 | 109 | 43  | 0 | 22 | 348 | 9   | 117 | 4.00E-45 | 150  |
| TcMYB52 | ATMYB0    | 50.4  | 125 | 62  | 0 | 34 | 408 | 15  | 139 | 5.00E-45 | 148  |
| TcMYB52 | ATMYB123  | 53.79 | 132 | 58  | 1 | 10 | 396 | 7   | 138 | 1.00E-44 | 148  |
| TcMYB52 | ATMYB11   | 61.11 | 108 | 42  | 0 | 22 | 345 | 9   | 116 | 1.00E-44 | 150  |
| TcMYB52 | ATMYB5    | 58.33 | 108 | 45  | 0 | 22 | 345 | 20  | 127 | 1.00E-44 | 147  |
| TcMYB52 | ATMYB30   | 38.14 | 236 | 129 | 6 | 22 | 678 | 9   | 241 | 2.00E-44 | 149  |
| TcMYB52 | AtMYB76   | 61.9  | 105 | 40  | 0 | 31 | 345 | 12  | 116 | 2.00E-44 | 150  |
| TcMYB52 | ATMYB29   | 62.86 | 105 | 39  | 0 | 31 | 345 | 12  | 116 | 2.00E-44 | 149  |
| TcMYB52 | ATMYB94   | 57.66 | 111 | 47  | 0 | 31 | 363 | 12  | 122 | 3.00E-44 | 149  |
| TcMYB52 | ATMYB111  | 61.9  | 105 | 40  | 0 | 31 | 345 | 12  | 116 | 3.00E-44 | 149  |
| TcMYB52 | AtMYB60   | 52    | 125 | 60  | 0 | 31 | 405 | 12  | 136 | 6.00E-44 | 147  |
| TcMYB52 | ATMYB35   | 60.19 | 108 | 43  | 0 | 22 | 345 | 9   | 116 | 1.00E-43 | 147  |
| TcMYB52 | ATMYB96   | 57.66 | 111 | 47  | 0 | 31 | 363 | 12  | 122 | 2.00E-43 | 147  |
| TcMYB52 | AtMYB24   | 54.76 | 126 | 57  | 1 | 28 | 405 | 16  | 134 | 2.00E-43 | 143  |
| TcMYB52 | AtMYB62   | 58.18 | 110 | 46  | 0 | 28 | 357 | 18  | 127 | 4.00E-43 | 145  |
| TcMYB52 | ATMYB122  | 62.86 | 105 | 39  | 0 | 31 | 345 | 12  | 116 | 4.00E-43 | 146  |
| TcMYB52 | ATMYB33   | 63.46 | 104 | 38  | 0 | 31 | 342 | 32  | 135 | 8.00E-43 | 149  |
| TcMYB52 | ATMYB48   | 38.16 | 228 | 127 | 5 | 34 | 675 | 8   | 223 | 2.00E-42 | 142  |
| TcMYB52 | ATMYB31   | 51.91 | 131 | 60  | 1 | 22 | 405 | 9   | 139 | 3.00E-42 | 144  |
| TcMYB52 | AtMYB108  | 34.17 | 278 | 156 | 6 | 16 | 768 | 14  | 281 | 3.00E-42 | 143  |
| TcMYB52 | ATMYB121  | 53.08 | 130 | 59  | 1 | 34 | 417 | 28  | 157 | 4.00E-42 | 142  |
| TcMYB52 | ATMYB37   | 51.15 | 131 | 63  | 2 | 22 | 411 | 9   | 132 | 7.00E-42 | 142  |
| TcMYB52 | ATMYB101  | 34.28 | 283 | 185 | 9 | 31 | 876 | 18  | 249 | 1.00E-41 | 145  |
| TcMYB52 | AtMYB116  | 56.48 | 108 | 47  | 0 | 34 | 357 | 19  | 126 | 3.00E-41 | 140  |
| TcMYB52 | ATMYB84   | 50.77 | 130 | 63  | 1 | 22 | 408 | 9   | 138 | 3.00E-41 | 140  |
| TcMYB52 | AtMYB114  | 57.69 | 104 | 44  | 0 | 31 | 342 | 8   | 111 | 5.00E-41 | 134  |
| TcMYB52 | AtMYB112  | 55.14 | 107 | 48  | 0 | 28 | 348 | 31  | 137 | 7.00E-41 | 137  |
| TcMYB52 | AtMYB81   | 57.55 | 106 | 45  | 0 | 22 | 339 | 17  | 122 | 7.00E-41 | 142  |
| TcMYB52 | ATMYB2    | 52.59 | 116 | 55  | 0 | 4  | 351 | 11  | 126 | 8.00E-41 | 138  |
| TcMYB52 | ATMYB65   | 59.62 | 104 | 42  | 0 | 31 | 342 | 41  | 144 | 8.00E-41 | 144  |
| TcMYB52 | AtMYB97   | 58.25 | 103 | 43  | 0 | 31 | 339 | 19  | 121 | 1.00E-40 | 140  |
| TcMYB52 | ATMYB120  | 58.49 | 106 | 44  | 0 | 31 | 348 | 26  | 131 | 1.00E-40 | 143  |
| TcMYB52 | ATMYB59-3 | 48.12 | 133 | 69  | 1 | 34 | 432 | 9   | 139 | 2.00E-40 | 136  |
| TcMYB52 | ATMYB38   | 39.09 | 197 | 107 | 6 | 22 | 573 | 9   | 192 | 3.00E-40 | 137  |
| TcMYB52 | AtMYB36   | 57.8  | 109 | 45  | 1 | 22 | 345 | 9   | 117 | 3.00E-40 | 138  |
| TcMYB52 | ATMYB68   | 52.5  | 120 | 56  | 1 | 22 | 378 | 9   | 128 | 7.00E-40 | 138  |
| TcMYB52 | ATMYB90   | 38.69 | 199 | 108 | 5 | 31 | 585 | 8   | 203 | 6.00E-39 | 132  |
| TcMYB52 | ATMYB75   | 56.73 | 104 | 45  | 0 | 31 | 342 | 8   | 111 | 9.00E-39 | 132  |
| TcMYB52 | ATMYB87   | 31.68 | 262 | 173 | 5 | 22 | 789 | 9   | 250 | 2.00E-38 | 133  |
| TcMYB52 | AtMYB27   | 53.21 | 109 | 51  | 0 | 31 | 357 | 9   | 117 | 7.00E-38 | 129  |
| TcMYB52 | AtMYB113  | 48.48 | 132 | 61  | 1 | 16 | 390 | 3   | 134 | 1.00E-37 | 129  |
| TcMYB52 | ATMYB78   | 48    | 125 | 51  | 1 | 16 | 348 | 21  | 145 | 5.00E-35 | 124  |
| TcMYB52 | AtMYB104  | 50    | 102 | 51  | 0 | 22 | 327 | 13  | 114 | 7.00E-33 | 119  |
| TcMYB52 | ATMYB73   | 48.25 | 114 | 59  | 1 | 1  | 342 | 1   | 113 | 3.00E-29 | 108  |
| TcMYB52 | AtMYB115  | 34.87 | 152 | 86  | 3 | 22 | 438 | 153 | 303 | 2.00E-28 | 107  |
| TcMYB52 | AtMYB70   | 47.37 | 114 | 60  | 1 | 1  | 342 | 1   | 113 | 2.00E-28 | 105  |
| TcMYB52 | ATMYB118  | 36.3  | 146 | 92  | 2 | 7  | 441 | 179 | 322 | 3.00E-28 | 107  |
| TcMYB52 | AtMYB98   | 38.51 | 148 | 82  | 3 | 22 | 438 | 212 | 358 | 1.00E-27 | 105  |
| TcMYB52 | AtMYB1    | 50.98 | 102 | 50  | 1 | 37 | 342 | 55  | 155 | 1.00E-27 | 105  |
| TcMYB52 | ATMYB105  | 37.41 | 139 | 86  | 2 | 4  | 417 | 96  | 232 | 2.00E-27 | 103  |
| TcMYB52 | AtMYB64   | 38.66 | 119 | 73  | 1 | 37 | 393 | 105 | 222 | 3.00E-27 | 104  |
| TcMYB52 | ATMYB69   | 38.13 | 139 | 86  | 2 | 22 | 438 | 14  | 148 | 3.00E-27 | 101  |
| TcMYB52 | ATMYB119  | 36.69 | 139 | 85  | 2 | 4  | 411 | 94  | 231 | 4.00E-27 | 104  |
| TcMYB52 | AtMYB109  | 46.72 | 122 | 62  | 3 | 37 | 393 | 56  | 175 | 4.00E-27 | 103  |
| TcMYB52 | ATMYB44   | 47.06 | 102 | 54  | 1 | 37 | 342 | 6   | 106 | 7.00E-27 | 101  |
| TcMYB52 | ATMYB54   | 38.64 | 132 | 80  | 2 | 37 | 429 | 6   | 135 | 8.00E-27 | 100  |
| TcMYB52 | ATMYB77   | 47.06 | 102 | 54  | 1 | 37 | 342 | 6   | 106 | 2.00E-26 | 100  |
| TcMYB52 | ATMYB25   | 49.51 | 103 | 51  | 2 | 37 | 342 | 50  | 150 | 2.00E-26 | 101  |
| TcMYB52 | AtMYB100  | 39.66 | 116 | 70  | 2 | 22 | 369 | 21  | 134 | 3.00E-25 | 95.5 |
| TcMYB52 | AtMYB117  | 40    | 120 | 70  | 3 | 10 | 363 | 88  | 205 | 3.00E-24 | 95.1 |
| TcMYB52 | ATMYB52   | 43.14 | 102 | 58  | 1 | 37 | 342 | 5   | 105 | 4.00E-24 | 92.8 |
| TcMYB52 | ATMYB110  | 34.71 | 121 | 79  | 1 | 37 | 399 | 67  | 186 | 7.00E-23 | 90.5 |
| TcMYB52 | ATMYB88   | 33.12 | 157 | 97  | 4 | 46 | 492 | 33  | 188 | 2.00E-22 | 90.9 |
| TcMYB52 | AtMYB56   | 37.74 | 106 | 66  | 1 | 37 | 354 | 93  | 197 | 5.00E-21 | 85.5 |
| TcMYB52 | AtMYB124  | 25.98 | 254 | 182 | 6 | 46 | 789 | 28  | 277 | 9.00E-21 | 85.9 |
| TcMYB52 | AtMYB89   | 32.35 | 136 | 92  | 1 | 16 | 423 | 49  | 183 | 3.00E-20 | 80.5 |
| TcMYB52 | AtMYB22   | 35.34 | 116 | 75  | 3 | 22 | 369 | 49  | 161 | 1.00E-19 | 80.5 |
| TcMYB52 | ATMYB91   | 37.04 | 108 | 66  | 1 | 46 | 363 | 7   | 114 | 1.00E-18 | 79   |
| TcMYB53 | ATMYB12   | 58.62 | 145 | 47  | 3 | 1  | 396 | 1   | 144 | 1.00E-55 | 178  |
| TcMYB53 | ATMYB5    | 64.8  | 125 | 44  | 1 | 13 | 387 | 16  | 139 | 1.00E-55 | 174  |
| TcMYB53 | ATMYB15   | 36.68 | 289 | 166 | 8 | 1  | 816 | 1   | 275 | 3.00E-55 | 174  |
| TcMYB53 | ATMYB123  | 70.18 | 114 | 34  | 0 | 7  | 348 | 4   | 117 | 5.00E-55 | 173  |
| TcMYB53 | AtMYB74   | 42.13 | 197 | 105 | 2 | 1  | 564 | 1   | 197 | 8.00E-55 | 174  |
| TcMYB53 | ATMYB23   | 45.5  | 200 | 91  | 4 | 37 | 582 | 12  | 210 | 9.00E-55 | 171  |
| TcMYB53 | ATMYB111  | 66.38 | 116 | 39  | 1 | 1  | 348 | 1   | 115 | 1.00E-54 | 174  |
| TcMYB53 | ATMYB3    | 52.9  | 155 | 73  | 3 | 1  | 465 | 1   | 141 | 3.00E-54 | 171  |
| TcMYB53 | AtMYB6    | 48.33 | 180 | 78  | 4 | 1  | 495 | 1   | 179 | 6.00E-54 | 169  |
| TcMYB53 | ATMYB66   | 44.21 | 190 | 106 | 4 | 37 | 606 | 16  | 189 | 9.00E-54 | 168  |

|         |           |       |     |     |   |    |     |    |     |          |     |
|---------|-----------|-------|-----|-----|---|----|-----|----|-----|----------|-----|
| TcMYB53 | ATMYB11   | 57.66 | 137 | 53  | 2 | 1  | 396 | 1  | 136 | 1.00E-53 | 172 |
| TcMYB53 | MYB8      | 61.02 | 118 | 46  | 1 | 1  | 354 | 1  | 117 | 1.00E-52 | 165 |
| TcMYB53 | ATMYB4    | 57.36 | 129 | 55  | 1 | 1  | 387 | 1  | 128 | 2.00E-52 | 167 |
| TcMYB53 | ATMYB102  | 37.7  | 244 | 143 | 5 | 1  | 705 | 1  | 238 | 3.00E-52 | 168 |
| TcMYB53 | AtMYB32   | 57.36 | 129 | 55  | 1 | 1  | 387 | 1  | 128 | 4.00E-52 | 166 |
| TcMYB53 | AtMYB114  | 64.35 | 115 | 41  | 0 | 34 | 378 | 7  | 121 | 6.00E-52 | 161 |
| TcMYB53 | MYB7      | 61.86 | 118 | 45  | 1 | 1  | 354 | 1  | 117 | 6.00E-52 | 165 |
| TcMYB53 | ATMYB13   | 62.07 | 116 | 44  | 1 | 1  | 348 | 1  | 115 | 3.00E-51 | 163 |
| TcMYB53 | ATMYB34   | 53.64 | 151 | 70  | 1 | 1  | 453 | 1  | 150 | 4.00E-51 | 164 |
| TcMYB53 | AtMYB41   | 41.18 | 204 | 120 | 2 | 1  | 612 | 1  | 200 | 5.00E-51 | 163 |
| TcMYB53 | AtMYB9    | 57.36 | 129 | 55  | 1 | 1  | 387 | 1  | 128 | 5.00E-51 | 165 |
| TcMYB53 | AtMYB107  | 56.59 | 129 | 56  | 1 | 1  | 387 | 1  | 128 | 7.00E-51 | 164 |
| TcMYB53 | ATMYB75   | 60.33 | 121 | 48  | 0 | 34 | 396 | 7  | 127 | 1.00E-50 | 161 |
| TcMYB53 | AtMYB82   | 62.28 | 114 | 43  | 0 | 40 | 381 | 13 | 126 | 1.00E-50 | 160 |
| TcMYB53 | ATMYB0    | 59.13 | 115 | 47  | 0 | 37 | 381 | 14 | 128 | 2.00E-50 | 160 |
| TcMYB53 | AtMYB85   | 43.59 | 195 | 106 | 4 | 1  | 573 | 1  | 191 | 4.00E-50 | 160 |
| TcMYB53 | AtMYB17   | 54.48 | 134 | 61  | 1 | 1  | 402 | 1  | 133 | 1.00E-49 | 160 |
| TcMYB53 | ATMYB90   | 63.25 | 117 | 43  | 1 | 34 | 384 | 7  | 120 | 2.00E-49 | 158 |
| TcMYB53 | ATMYB14   | 61.21 | 116 | 45  | 1 | 1  | 348 | 1  | 115 | 2.00E-49 | 158 |
| TcMYB53 | AtMYB42   | 50    | 164 | 81  | 3 | 1  | 489 | 1  | 160 | 2.00E-49 | 159 |
| TcMYB53 | ATMYB29   | 48.8  | 166 | 83  | 2 | 1  | 492 | 1  | 165 | 3.00E-49 | 160 |
| TcMYB53 | AtMYB51   | 57.03 | 128 | 55  | 0 | 1  | 384 | 1  | 128 | 5.00E-49 | 160 |
| TcMYB53 | ATMYB94   | 62.07 | 116 | 44  | 1 | 1  | 348 | 1  | 115 | 6.00E-49 | 159 |
| TcMYB53 | ATMYB28   | 47.2  | 161 | 85  | 1 | 1  | 483 | 1  | 160 | 6.00E-49 | 160 |
| TcMYB53 | AtMYB113  | 61.21 | 116 | 45  | 1 | 1  | 348 | 1  | 111 | 6.00E-49 | 157 |
| TcMYB53 | ATMYB16   | 44.15 | 188 | 105 | 2 | 1  | 564 | 1  | 184 | 7.00E-49 | 159 |
| TcMYB53 | AtMYB60   | 49.68 | 157 | 78  | 2 | 1  | 468 | 1  | 156 | 1.00E-48 | 157 |
| TcMYB53 | ATMYB31   | 50.99 | 151 | 69  | 2 | 1  | 438 | 1  | 150 | 1.00E-48 | 158 |
| TcMYB53 | ATMYB96   | 61.21 | 116 | 45  | 1 | 1  | 348 | 1  | 115 | 7.00E-48 | 157 |
| TcMYB53 | ATMYB121  | 48.72 | 156 | 68  | 1 | 34 | 465 | 26 | 181 | 1.00E-47 | 154 |
| TcMYB53 | ATMYB122  | 61.74 | 115 | 44  | 1 | 1  | 345 | 1  | 114 | 2.00E-47 | 155 |
| TcMYB53 | ATMYB30   | 49.67 | 153 | 71  | 2 | 1  | 441 | 1  | 152 | 7.00E-47 | 154 |
| TcMYB53 | AtMYB43   | 38.28 | 209 | 129 | 3 | 1  | 627 | 1  | 187 | 8.00E-47 | 154 |
| TcMYB53 | ATMYB63   | 38.5  | 213 | 122 | 4 | 4  | 615 | 4  | 214 | 1.00E-46 | 152 |
| TcMYB53 | ATMYB35   | 33.21 | 268 | 148 | 5 | 1  | 711 | 1  | 267 | 2.00E-46 | 152 |
| TcMYB53 | ATMYB92   | 56.59 | 129 | 56  | 1 | 1  | 387 | 1  | 128 | 2.00E-46 | 153 |
| TcMYB53 | ATMYB80   | 52.71 | 129 | 61  | 1 | 1  | 387 | 1  | 128 | 3.00E-46 | 152 |
| TcMYB53 | AtMYB20   | 53.49 | 129 | 60  | 1 | 1  | 387 | 1  | 128 | 3.00E-46 | 151 |
| TcMYB53 | AtMYB53   | 54.26 | 129 | 59  | 1 | 1  | 387 | 1  | 128 | 3.00E-46 | 152 |
| TcMYB53 | AtMYB79   | 59.48 | 116 | 47  | 0 | 37 | 384 | 6  | 121 | 3.00E-46 | 150 |
| TcMYB53 | ATMYB71   | 38.03 | 213 | 127 | 4 | 34 | 657 | 17 | 211 | 6.00E-46 | 150 |
| TcMYB53 | ATMYB72   | 56.1  | 123 | 54  | 1 | 4  | 372 | 4  | 125 | 6.00E-46 | 150 |
| TcMYB53 | ATMYB106  | 45.61 | 171 | 93  | 2 | 10 | 522 | 47 | 213 | 6.00E-46 | 153 |
| TcMYB53 | AtMYB93   | 53.49 | 129 | 60  | 1 | 1  | 387 | 1  | 128 | 7.00E-46 | 152 |
| TcMYB53 | AtMYB10   | 44.51 | 164 | 91  | 2 | 7  | 498 | 5  | 164 | 1.00E-45 | 148 |
| TcMYB53 | AtMYB36   | 47.44 | 156 | 81  | 3 | 1  | 465 | 1  | 152 | 1.00E-45 | 150 |
| TcMYB53 | ATMYB58   | 57.39 | 115 | 49  | 1 | 4  | 348 | 4  | 117 | 2.00E-45 | 148 |
| TcMYB53 | AtMYB50   | 47.1  | 155 | 82  | 1 | 1  | 465 | 1  | 154 | 7.00E-45 | 148 |
| TcMYB53 | ATMYB37   | 52.63 | 133 | 62  | 2 | 1  | 396 | 1  | 132 | 7.00E-45 | 149 |
| TcMYB53 | ATMYB86   | 59.48 | 116 | 47  | 1 | 1  | 348 | 1  | 115 | 2.00E-44 | 148 |
| TcMYB53 | AtMYB76   | 51.94 | 129 | 62  | 1 | 1  | 387 | 1  | 128 | 2.00E-44 | 148 |
| TcMYB53 | ATMYB87   | 51.2  | 125 | 60  | 2 | 1  | 372 | 1  | 124 | 3.00E-44 | 146 |
| TcMYB53 | ATMYB84   | 51.97 | 127 | 60  | 2 | 1  | 378 | 1  | 126 | 3.00E-44 | 146 |
| TcMYB53 | AtMYB49   | 61.26 | 111 | 43  | 0 | 22 | 354 | 7  | 117 | 4.00E-44 | 146 |
| TcMYB53 | ATMYB2    | 55.26 | 114 | 51  | 0 | 10 | 351 | 11 | 124 | 2.00E-43 | 143 |
| TcMYB53 | ATMYB68   | 52.42 | 124 | 58  | 2 | 1  | 369 | 1  | 123 | 3.00E-43 | 145 |
| TcMYB53 | ATMYB38   | 39.62 | 212 | 119 | 8 | 1  | 609 | 1  | 202 | 4.00E-43 | 143 |
| TcMYB53 | ATMYB61   | 45.45 | 165 | 79  | 3 | 1  | 462 | 1  | 160 | 4.00E-43 | 145 |
| TcMYB53 | ATMYB59-3 | 51.49 | 134 | 65  | 3 | 37 | 438 | 8  | 132 | 6.00E-43 | 141 |
| TcMYB53 | AtMYB40   | 38.12 | 223 | 131 | 7 | 1  | 648 | 1  | 205 | 1.00E-42 | 141 |
| TcMYB53 | ATMYB46   | 49.26 | 136 | 65  | 2 | 25 | 420 | 14 | 149 | 1.00E-42 | 141 |
| TcMYB53 | ATMYB95   | 57.94 | 107 | 45  | 0 | 28 | 348 | 9  | 115 | 1.00E-42 | 141 |
| TcMYB53 | AtMYB62   | 43.71 | 167 | 86  | 1 | 40 | 516 | 20 | 186 | 2.00E-42 | 141 |
| TcMYB53 | ATMYB48   | 38.01 | 221 | 133 | 5 | 34 | 684 | 6  | 219 | 5.00E-42 | 139 |
| TcMYB53 | ATMYB57   | 59.8  | 102 | 41  | 0 | 40 | 345 | 26 | 127 | 8.00E-42 | 137 |
| TcMYB53 | ATMYB99   | 52.46 | 122 | 51  | 2 | 4  | 348 | 3  | 123 | 8.00E-42 | 138 |
| TcMYB53 | AtMYB112  | 43.45 | 168 | 85  | 2 | 40 | 513 | 33 | 200 | 2.00E-41 | 137 |
| TcMYB53 | ATMYB3    | 58.82 | 102 | 42  | 0 | 40 | 345 | 21 | 122 | 3.00E-41 | 136 |
| TcMYB53 | AtMYB24   | 59.8  | 102 | 41  | 0 | 40 | 345 | 18 | 119 | 3.00E-41 | 136 |
| TcMYB53 | AtMYB103  | 53.45 | 116 | 54  | 1 | 1  | 348 | 1  | 115 | 4.00E-41 | 140 |
| TcMYB53 | AtMYB83   | 43.41 | 182 | 99  | 5 | 40 | 573 | 31 | 192 | 4.00E-41 | 139 |
| TcMYB53 | ATMYB55   | 53.12 | 128 | 48  | 2 | 1  | 348 | 1  | 127 | 6.00E-41 | 139 |
| TcMYB53 | ATMYB67   | 50.43 | 115 | 57  | 1 | 16 | 360 | 16 | 129 | 7.00E-41 | 137 |
| TcMYB53 | ATMYB101  | 56.19 | 105 | 46  | 0 | 34 | 348 | 17 | 121 | 1.00E-40 | 140 |
| TcMYB53 | AtMYB116  | 57.69 | 104 | 44  | 0 | 40 | 351 | 19 | 122 | 2.00E-40 | 136 |
| TcMYB53 | AtMYB47   | 53.27 | 107 | 50  | 0 | 28 | 348 | 9  | 115 | 3.00E-40 | 135 |
| TcMYB53 | ATMYB120  | 58.82 | 102 | 42  | 0 | 40 | 345 | 27 | 128 | 3.00E-39 | 137 |
| TcMYB53 | AtMYB27   | 55.36 | 112 | 50  | 0 | 25 | 360 | 5  | 116 | 4.00E-39 | 131 |
| TcMYB53 | AtMYB19   | 39.57 | 187 | 102 | 5 | 40 | 567 | 13 | 199 | 6.00E-39 | 131 |
| TcMYB53 | AtMYB108  | 58.82 | 102 | 42  | 0 | 40 | 345 | 20 | 121 | 8.00E-39 | 132 |

|         |          |       |     |     |    |     |     |     |     |          |      |
|---------|----------|-------|-----|-----|----|-----|-----|-----|-----|----------|------|
| TcMYB53 | AtMYB18  | 50    | 120 | 60  | 0  | 40  | 399 | 11  | 130 | 9.00E-39 | 131  |
| TcMYB53 | AtMYB45  | 34.93 | 209 | 133 | 3  | 40  | 657 | 19  | 217 | 1.00E-38 | 130  |
| TcMYB53 | ATMYB33  | 53.1  | 113 | 51  | 1  | 16  | 348 | 23  | 135 | 3.00E-38 | 135  |
| TcMYB53 | ATMYB65  | 53.7  | 108 | 50  | 0  | 25  | 348 | 37  | 144 | 7.00E-38 | 134  |
| TcMYB53 | ATMYB26  | 29.85 | 325 | 217 | 12 | 1   | 942 | 1   | 287 | 1.00E-37 | 130  |
| TcMYB53 | AtMYB97  | 52.94 | 102 | 48  | 0  | 40  | 345 | 20  | 121 | 8.00E-37 | 129  |
| TcMYB53 | AtMYB81  | 52.43 | 103 | 49  | 0  | 37  | 345 | 20  | 122 | 2.00E-36 | 128  |
| TcMYB53 | ATMYB78  | 52.59 | 116 | 41  | 1  | 40  | 345 | 27  | 142 | 5.00E-35 | 122  |
| TcMYB53 | AtMYB104 | 39.44 | 142 | 83  | 1  | 37  | 453 | 16  | 157 | 1.00E-33 | 120  |
| TcMYB53 | ATMYB105 | 36.23 | 138 | 82  | 2  | 22  | 417 | 100 | 236 | 2.00E-26 | 99.4 |
| TcMYB53 | ATMYB25  | 33.9  | 177 | 113 | 4  | 43  | 561 | 50  | 214 | 6.00E-26 | 99   |
| TcMYB53 | AtMYB117 | 37.69 | 130 | 76  | 2  | 22  | 396 | 91  | 219 | 7.00E-26 | 98.6 |
| TcMYB53 | ATMYB118 | 42.72 | 103 | 59  | 1  | 22  | 330 | 182 | 283 | 4.00E-25 | 97.4 |
| TcMYB53 | ATMYB118 | 26.19 | 126 | 84  | 5  | 55  | 405 | 144 | 261 | 1.00E-04 | 35.4 |
| TcMYB53 | AtMYB115 | 31.71 | 164 | 112 | 2  | 43  | 534 | 158 | 317 | 5.00E-25 | 96.3 |
| TcMYB53 | ATMYB54  | 34.19 | 155 | 96  | 4  | 43  | 489 | 6   | 154 | 7.00E-25 | 93.6 |
| TcMYB53 | AtMYB70  | 42.16 | 102 | 59  | 1  | 43  | 348 | 13  | 113 | 9.00E-25 | 94.7 |
| TcMYB53 | ATMYB73  | 42.16 | 102 | 59  | 1  | 43  | 348 | 13  | 113 | 1.00E-24 | 94.7 |
| TcMYB53 | ATMYB52  | 41.67 | 108 | 63  | 1  | 43  | 366 | 5   | 111 | 1.00E-24 | 93.2 |
| TcMYB53 | AtMYB1   | 41.67 | 108 | 63  | 1  | 43  | 366 | 55  | 161 | 2.00E-24 | 95.1 |
| TcMYB53 | AtMYB98  | 44.66 | 103 | 57  | 1  | 22  | 330 | 210 | 311 | 4.00E-24 | 94.4 |
| TcMYB53 | AtMYB98  | 28.75 | 80  | 53  | 2  | 142 | 369 | 197 | 276 | 2.00E-04 | 35   |
| TcMYB53 | AtMYB64  | 28.5  | 193 | 138 | 3  | 43  | 621 | 105 | 269 | 7.00E-24 | 93.6 |
| TcMYB53 | ATMYB110 | 32.75 | 171 | 113 | 4  | 43  | 549 | 67  | 221 | 8.00E-24 | 92   |
| TcMYB53 | ATMYB44  | 42.16 | 102 | 59  | 1  | 43  | 348 | 6   | 106 | 8.00E-24 | 92   |
| TcMYB53 | AtMYB109 | 43.69 | 103 | 57  | 2  | 43  | 348 | 56  | 156 | 2.00E-23 | 92.4 |
| TcMYB53 | ATMYB91  | 39.13 | 115 | 68  | 2  | 40  | 378 | 3   | 116 | 2.00E-23 | 92   |
| TcMYB53 | ATMYB119 | 44.79 | 96  | 53  | 1  | 43  | 330 | 105 | 199 | 2.00E-23 | 92.4 |
| TcMYB53 | AtMYB100 | 40.78 | 103 | 61  | 1  | 25  | 333 | 20  | 121 | 2.00E-22 | 86.7 |
| TcMYB53 | AtMYB56  | 36.75 | 117 | 74  | 2  | 43  | 393 | 93  | 206 | 2.00E-22 | 88.2 |
| TcMYB53 | ATMYB69  | 38.53 | 109 | 67  | 1  | 22  | 348 | 12  | 119 | 3.00E-22 | 86.7 |
| TcMYB53 | ATMYB77  | 40.2  | 102 | 61  | 1  | 43  | 348 | 6   | 106 | 3.00E-22 | 87.4 |
| TcMYB53 | AtMYB89  | 37.5  | 112 | 70  | 1  | 46  | 381 | 57  | 167 | 1.00E-21 | 83.6 |
| TcMYB53 | AtMYB124 | 40    | 100 | 60  | 1  | 52  | 351 | 28  | 126 | 4.00E-20 | 82.8 |
| TcMYB53 | AtMYB22  | 36.89 | 103 | 65  | 2  | 25  | 333 | 48  | 148 | 2.00E-19 | 79   |
| TcMYB53 | ATMYB88  | 37.1  | 124 | 78  | 3  | 52  | 423 | 33  | 149 | 3.00E-19 | 80.5 |
| TcMYB54 | ATMYB3   | 58.9  | 163 | 63  | 3  | 1   | 477 | 1   | 161 | 5.00E-65 | 200  |
| TcMYB54 | AtMYB6   | 49.74 | 195 | 98  | 2  | 1   | 585 | 1   | 185 | 2.00E-63 | 195  |
| TcMYB54 | ATMYB12  | 62.34 | 154 | 54  | 2  | 1   | 450 | 1   | 153 | 1.00E-62 | 197  |
| TcMYB54 | MYB8     | 60.42 | 144 | 57  | 1  | 1   | 432 | 1   | 143 | 5.00E-62 | 191  |
| TcMYB54 | ATMYB4   | 54.91 | 173 | 76  | 3  | 1   | 513 | 1   | 172 | 2.00E-61 | 192  |
| TcMYB54 | AtMYB32  | 62.59 | 147 | 52  | 3  | 1   | 432 | 1   | 146 | 5.00E-61 | 190  |
| TcMYB54 | ATMYB111 | 59.63 | 161 | 45  | 3  | 1   | 423 | 1   | 159 | 8.00E-61 | 192  |
| TcMYB54 | MYB7     | 65.65 | 131 | 45  | 1  | 1   | 393 | 1   | 130 | 1.00E-60 | 189  |
| TcMYB54 | ATMYB5   | 57.24 | 152 | 65  | 1  | 13  | 468 | 16  | 166 | 5.00E-60 | 187  |
| TcMYB54 | ATMYB123 | 58.39 | 161 | 67  | 2  | 7   | 489 | 4   | 152 | 9.00E-60 | 186  |
| TcMYB54 | ATMYB34  | 45.45 | 231 | 126 | 3  | 1   | 693 | 1   | 227 | 3.00E-59 | 186  |
| TcMYB54 | AtMYB107 | 46.76 | 216 | 112 | 3  | 1   | 639 | 1   | 204 | 3.00E-59 | 187  |
| TcMYB54 | AtMYB74  | 67.77 | 121 | 39  | 0  | 1   | 363 | 1   | 121 | 4.00E-59 | 187  |
| TcMYB54 | AtMYB9   | 41.2  | 267 | 154 | 6  | 1   | 792 | 1   | 247 | 2.00E-58 | 186  |
| TcMYB54 | ATMYB14  | 64.12 | 131 | 47  | 1  | 1   | 393 | 1   | 130 | 2.00E-58 | 182  |
| TcMYB54 | AtMYB41  | 67.77 | 121 | 39  | 1  | 1   | 363 | 1   | 120 | 6.00E-58 | 182  |
| TcMYB54 | ATMYB15  | 64.34 | 129 | 46  | 1  | 1   | 387 | 1   | 128 | 9.00E-58 | 182  |
| TcMYB54 | AtMYB51  | 57.62 | 151 | 63  | 1  | 1   | 450 | 1   | 151 | 1.00E-57 | 184  |
| TcMYB54 | ATMYB13  | 59.03 | 144 | 58  | 2  | 1   | 429 | 1   | 143 | 3.00E-57 | 179  |
| TcMYB54 | ATMYB11  | 70.09 | 117 | 35  | 1  | 1   | 351 | 1   | 116 | 4.00E-57 | 182  |
| TcMYB54 | ATMYB102 | 66.94 | 121 | 40  | 1  | 1   | 363 | 1   | 120 | 3.00E-55 | 177  |
| TcMYB54 | ATMYB96  | 43.97 | 232 | 109 | 5  | 1   | 633 | 1   | 226 | 3.00E-55 | 177  |
| TcMYB54 | ATMYB94  | 38.81 | 286 | 145 | 6  | 1   | 768 | 1   | 285 | 2.00E-54 | 175  |
| TcMYB54 | ATMYB16  | 62.77 | 137 | 51  | 2  | 1   | 411 | 1   | 135 | 4.00E-54 | 174  |
| TcMYB54 | ATMYB80  | 62.81 | 121 | 45  | 1  | 1   | 363 | 1   | 120 | 1.00E-53 | 172  |
| TcMYB54 | AtMYB17  | 65.29 | 121 | 42  | 1  | 1   | 363 | 1   | 120 | 1.00E-53 | 172  |
| TcMYB54 | AtMYB82  | 60.48 | 124 | 46  | 1  | 19  | 381 | 3   | 126 | 2.00E-53 | 168  |
| TcMYB54 | AtMYB85  | 60    | 135 | 54  | 1  | 1   | 405 | 1   | 134 | 4.00E-53 | 169  |
| TcMYB54 | ATMYB29  | 37.94 | 311 | 177 | 7  | 1   | 885 | 1   | 288 | 5.00E-53 | 171  |
| TcMYB54 | ATMYB28  | 46.91 | 194 | 89  | 3  | 1   | 540 | 1   | 193 | 7.00E-53 | 172  |
| TcMYB54 | ATMYB92  | 38.06 | 310 | 163 | 10 | 1   | 843 | 1   | 301 | 9.00E-53 | 171  |
| TcMYB54 | AtMYB93  | 65.29 | 121 | 42  | 1  | 1   | 363 | 1   | 120 | 1.00E-52 | 171  |
| TcMYB54 | ATMYB66  | 62.2  | 127 | 45  | 2  | 22  | 393 | 8   | 131 | 1.00E-52 | 166  |
| TcMYB54 | ATMYB106 | 61.19 | 134 | 52  | 1  | 10  | 411 | 47  | 179 | 1.00E-52 | 172  |
| TcMYB54 | ATMYB35  | 61.98 | 121 | 46  | 1  | 1   | 363 | 1   | 120 | 5.00E-52 | 168  |
| TcMYB54 | AtMYB49  | 69.3  | 114 | 35  | 0  | 22  | 363 | 7   | 120 | 5.00E-52 | 168  |
| TcMYB54 | AtMYB20  | 50.6  | 166 | 82  | 2  | 1   | 498 | 1   | 163 | 5.00E-52 | 167  |
| TcMYB54 | ATMYB122 | 57.66 | 137 | 58  | 1  | 1   | 411 | 1   | 136 | 7.00E-52 | 168  |
| TcMYB54 | ATMYB23  | 65.14 | 109 | 38  | 0  | 25  | 351 | 8   | 116 | 1.00E-51 | 164  |
| TcMYB54 | ATMYB72  | 62.6  | 123 | 46  | 1  | 4   | 372 | 4   | 125 | 1.00E-51 | 166  |
| TcMYB54 | AtMYB53  | 59.29 | 140 | 53  | 2  | 1   | 408 | 1   | 139 | 2.00E-51 | 167  |
| TcMYB54 | ATMYB86  | 59.85 | 137 | 55  | 1  | 1   | 411 | 1   | 136 | 2.00E-51 | 168  |
| TcMYB54 | AtMYB42  | 67.52 | 117 | 38  | 1  | 1   | 351 | 1   | 116 | 2.00E-51 | 166  |
| TcMYB54 | ATMYB58  | 46.82 | 173 | 92  | 3  | 4   | 522 | 4   | 166 | 2.00E-51 | 165  |

|         |           |       |     |     |   |     |     |     |     |          |      |
|---------|-----------|-------|-----|-----|---|-----|-----|-----|-----|----------|------|
| TcMYB54 | AtMYB60   | 47.89 | 190 | 85  | 5 | 1   | 528 | 1   | 188 | 4.00E-51 | 165  |
| TcMYB54 | AtMYB76   | 56.34 | 142 | 62  | 2 | 1   | 426 | 1   | 138 | 4.00E-51 | 166  |
| TcMYB54 | ATMYB0    | 63.72 | 113 | 41  | 0 | 43  | 381 | 16  | 128 | 5.00E-51 | 163  |
| TcMYB54 | AtMYB114  | 66.67 | 105 | 35  | 0 | 34  | 348 | 7   | 111 | 5.00E-51 | 160  |
| TcMYB54 | AtMYB36   | 48.24 | 170 | 87  | 3 | 1   | 507 | 1   | 166 | 7.00E-51 | 166  |
| TcMYB54 | ATMYB30   | 49.71 | 175 | 76  | 3 | 1   | 489 | 1   | 172 | 8.00E-51 | 165  |
| TcMYB54 | AtMYB40   | 40.43 | 230 | 132 | 4 | 1   | 675 | 1   | 212 | 1.00E-50 | 163  |
| TcMYB54 | ATMYB63   | 52.74 | 146 | 69  | 1 | 4   | 441 | 4   | 148 | 1.00E-50 | 164  |
| TcMYB54 | ATMYB61   | 62.2  | 127 | 48  | 2 | 1   | 381 | 1   | 125 | 2.00E-50 | 166  |
| TcMYB54 | AtMYB43   | 38.65 | 282 | 161 | 9 | 1   | 810 | 1   | 269 | 2.00E-50 | 164  |
| TcMYB54 | ATMYB75   | 66.67 | 105 | 35  | 0 | 34  | 348 | 7   | 111 | 5.00E-50 | 161  |
| TcMYB54 | AtMYB50   | 38.04 | 276 | 146 | 8 | 1   | 753 | 1   | 266 | 1.00E-49 | 162  |
| TcMYB54 | ATMYB84   | 63.33 | 120 | 43  | 2 | 1   | 357 | 1   | 119 | 2.00E-49 | 161  |
| TcMYB54 | ATMYB37   | 58.59 | 128 | 52  | 2 | 1   | 381 | 1   | 127 | 2.00E-49 | 162  |
| TcMYB54 | ATMYB90   | 65.14 | 109 | 38  | 0 | 34  | 360 | 7   | 115 | 3.00E-49 | 159  |
| TcMYB54 | AtMYB113  | 53.24 | 139 | 65  | 2 | 1   | 417 | 1   | 131 | 3.00E-49 | 159  |
| TcMYB54 | ATMYB31   | 63.25 | 117 | 43  | 1 | 1   | 351 | 1   | 116 | 2.00E-48 | 159  |
| TcMYB54 | ATMYB67   | 36.74 | 264 | 126 | 7 | 16  | 684 | 16  | 273 | 2.00E-48 | 159  |
| TcMYB54 | ATMYB71   | 59.17 | 120 | 49  | 0 | 28  | 387 | 15  | 134 | 2.00E-48 | 157  |
| TcMYB54 | AtMYB103  | 61.02 | 118 | 46  | 1 | 1   | 354 | 1   | 117 | 2.00E-48 | 160  |
| TcMYB54 | ATMYB68   | 61.67 | 120 | 45  | 2 | 1   | 357 | 1   | 119 | 2.00E-48 | 160  |
| TcMYB54 | AtMYB10   | 54.01 | 137 | 63  | 1 | 7   | 417 | 5   | 140 | 4.00E-48 | 155  |
| TcMYB54 | ATMYB46   | 55.22 | 134 | 51  | 1 | 37  | 411 | 18  | 151 | 5.00E-48 | 157  |
| TcMYB54 | ATMYB38   | 52.38 | 147 | 69  | 2 | 1   | 438 | 1   | 146 | 5.00E-48 | 157  |
| TcMYB54 | ATMYB87   | 51.7  | 147 | 66  | 3 | 1   | 426 | 1   | 146 | 6.00E-48 | 157  |
| TcMYB54 | ATMYB57   | 55.04 | 129 | 58  | 0 | 25  | 411 | 21  | 149 | 9.00E-48 | 154  |
| TcMYB54 | ATMYB3    | 61.06 | 113 | 44  | 0 | 22  | 360 | 15  | 127 | 1.00E-47 | 154  |
| TcMYB54 | ATMYB2    | 57.76 | 116 | 49  | 0 | 10  | 357 | 11  | 126 | 3.00E-47 | 154  |
| TcMYB54 | AtMYB83   | 33.86 | 316 | 190 | 8 | 37  | 927 | 30  | 309 | 3.00E-47 | 156  |
| TcMYB54 | AtMYB24   | 59.48 | 116 | 47  | 0 | 22  | 369 | 12  | 127 | 4.00E-47 | 152  |
| TcMYB54 | AtMYB79   | 60    | 115 | 46  | 0 | 43  | 387 | 8   | 122 | 8.00E-47 | 153  |
| TcMYB54 | ATMYB95   | 52.67 | 150 | 61  | 3 | 1   | 420 | 1   | 149 | 1.00E-46 | 153  |
| TcMYB54 | ATMYB55   | 50.31 | 163 | 66  | 3 | 1   | 444 | 1   | 162 | 1.00E-46 | 155  |
| TcMYB54 | ATMYB99   | 48.5  | 167 | 79  | 4 | 4   | 483 | 3   | 164 | 2.00E-46 | 152  |
| TcMYB54 | ATMYB121  | 38.69 | 199 | 119 | 3 | 25  | 612 | 23  | 212 | 3.00E-46 | 152  |
| TcMYB54 | AtMYB112  | 64.15 | 106 | 38  | 0 | 37  | 354 | 32  | 137 | 2.00E-45 | 149  |
| TcMYB54 | AtMYB47   | 50    | 156 | 64  | 3 | 1   | 426 | 1   | 155 | 3.00E-45 | 149  |
| TcMYB54 | ATMYB26   | 40    | 230 | 115 | 6 | 1   | 621 | 1   | 216 | 6.00E-45 | 151  |
| TcMYB54 | AtMYB62   | 59.46 | 111 | 45  | 0 | 22  | 354 | 14  | 124 | 2.00E-43 | 145  |
| TcMYB54 | ATMYB101  | 58.1  | 105 | 44  | 0 | 34  | 348 | 17  | 121 | 6.00E-43 | 148  |
| TcMYB54 | ATMYB120  | 49.25 | 134 | 68  | 0 | 37  | 438 | 26  | 159 | 6.00E-43 | 149  |
| TcMYB54 | AtMYB108  | 62.26 | 106 | 40  | 0 | 37  | 354 | 19  | 124 | 7.00E-43 | 144  |
| TcMYB54 | AtMYB116  | 59.62 | 104 | 42  | 0 | 43  | 354 | 20  | 123 | 5.00E-42 | 141  |
| TcMYB54 | ATMYB48   | 40.23 | 174 | 104 | 1 | 25  | 546 | 3   | 163 | 2.00E-41 | 139  |
| TcMYB54 | AtMYB81   | 57.01 | 107 | 46  | 1 | 43  | 363 | 22  | 127 | 3.00E-40 | 140  |
| TcMYB54 | AtMYB97   | 45    | 140 | 77  | 1 | 37  | 456 | 19  | 157 | 4.00E-40 | 139  |
| TcMYB54 | ATMYB33   | 53.39 | 118 | 53  | 2 | 16  | 363 | 23  | 139 | 1.00E-39 | 140  |
| TcMYB54 | ATMYB65   | 53.98 | 113 | 52  | 1 | 25  | 363 | 37  | 148 | 1.00E-39 | 140  |
| TcMYB54 | ATMYB78   | 53.23 | 124 | 44  | 1 | 25  | 354 | 22  | 145 | 2.00E-39 | 135  |
| TcMYB54 | AtMYB18   | 54.4  | 125 | 57  | 1 | 43  | 417 | 12  | 135 | 2.00E-39 | 134  |
| TcMYB54 | ATMYB59-3 | 48.78 | 123 | 63  | 0 | 43  | 411 | 10  | 132 | 4.00E-39 | 132  |
| TcMYB54 | AtMYB19   | 52    | 125 | 60  | 1 | 43  | 417 | 14  | 135 | 2.00E-38 | 131  |
| TcMYB54 | AtMYB27   | 56.48 | 108 | 47  | 0 | 25  | 348 | 5   | 112 | 2.00E-38 | 130  |
| TcMYB54 | AtMYB45   | 52.48 | 101 | 48  | 0 | 43  | 345 | 20  | 120 | 6.00E-35 | 122  |
| TcMYB54 | AtMYB104  | 32.49 | 237 | 155 | 7 | 43  | 738 | 18  | 219 | 3.00E-32 | 117  |
| TcMYB54 | AtMYB117  | 41.6  | 125 | 73  | 1 | 22  | 396 | 91  | 214 | 1.00E-29 | 109  |
| TcMYB54 | ATMYB105  | 35.4  | 161 | 102 | 4 | 22  | 498 | 100 | 254 | 6.00E-29 | 107  |
| TcMYB54 | ATMYB118  | 45.63 | 103 | 56  | 1 | 22  | 330 | 182 | 283 | 1.00E-27 | 105  |
| TcMYB54 | ATMYB118  | 30    | 60  | 41  | 1 | 187 | 363 | 184 | 243 | 2.00E-04 | 35   |
| TcMYB54 | ATMYB119  | 42.19 | 128 | 73  | 3 | 43  | 423 | 105 | 229 | 3.00E-27 | 104  |
| TcMYB54 | AtMYB64   | 40.98 | 122 | 72  | 2 | 37  | 402 | 103 | 221 | 1.00E-26 | 102  |
| TcMYB54 | ATMYB73   | 44.04 | 109 | 61  | 1 | 43  | 369 | 13  | 120 | 2.00E-26 | 100  |
| TcMYB54 | ATMYB73   | 31.25 | 64  | 43  | 1 | 202 | 390 | 13  | 76  | 3.00E-04 | 34.3 |
| TcMYB54 | AtMYB98   | 45.63 | 103 | 56  | 1 | 22  | 330 | 210 | 311 | 4.00E-26 | 100  |
| TcMYB54 | AtMYB98   | 29.17 | 72  | 50  | 1 | 142 | 354 | 197 | 268 | 1.00E-04 | 35.8 |
| TcMYB54 | AtMYB70   | 42.99 | 107 | 61  | 1 | 43  | 363 | 13  | 118 | 5.00E-26 | 99   |
| TcMYB54 | AtMYB70   | 31.25 | 64  | 43  | 1 | 202 | 390 | 13  | 76  | 3.00E-04 | 34.3 |
| TcMYB54 | ATMYB54   | 42.06 | 107 | 62  | 1 | 40  | 360 | 5   | 110 | 7.00E-26 | 97.1 |
| TcMYB54 | ATMYB52   | 41.96 | 112 | 65  | 1 | 40  | 375 | 4   | 114 | 8.00E-26 | 97.1 |
| TcMYB54 | AtMYB115  | 37.1  | 124 | 74  | 2 | 37  | 396 | 156 | 278 | 1.00E-25 | 98.6 |
| TcMYB54 | AtMYB100  | 40.65 | 123 | 72  | 2 | 25  | 390 | 20  | 141 | 2.00E-25 | 95.5 |
| TcMYB54 | AtMYB109  | 38.46 | 156 | 82  | 6 | 4   | 429 | 40  | 193 | 3.00E-25 | 98.2 |
| TcMYB54 | ATMYB110  | 40    | 110 | 66  | 1 | 40  | 369 | 66  | 174 | 3.00E-25 | 96.7 |
| TcMYB54 | AtMYB1    | 42.24 | 116 | 61  | 2 | 43  | 372 | 55  | 169 | 5.00E-25 | 97.4 |
| TcMYB54 | ATMYB69   | 38.35 | 133 | 81  | 2 | 22  | 417 | 12  | 143 | 1.00E-24 | 94   |
| TcMYB54 | ATMYB25   | 45.63 | 103 | 55  | 2 | 43  | 348 | 50  | 150 | 1.00E-24 | 95.9 |
| TcMYB54 | ATMYB44   | 44.12 | 102 | 57  | 1 | 43  | 348 | 6   | 106 | 2.00E-24 | 94.7 |
| TcMYB54 | ATMYB77   | 39.37 | 127 | 77  | 2 | 43  | 423 | 6   | 129 | 4.00E-24 | 93.6 |
| TcMYB54 | AtMYB124  | 33.9  | 177 | 111 | 7 | 52  | 564 | 28  | 187 | 2.00E-23 | 93.6 |
| TcMYB54 | AtMYB56   | 40    | 115 | 64  | 2 | 31  | 360 | 84  | 197 | 5.00E-23 | 90.9 |

|         |          |       |     |     |   |    |     |    |     |          |      |
|---------|----------|-------|-----|-----|---|----|-----|----|-----|----------|------|
| TcMYB54 | AtMYB89  | 38.14 | 118 | 72  | 2 | 46 | 396 | 57 | 173 | 8.00E-23 | 87.4 |
| TcMYB54 | AtMYB22  | 33.06 | 121 | 81  | 1 | 25 | 387 | 48 | 166 | 1.00E-20 | 82.8 |
| TcMYB54 | ATMYB91  | 34.45 | 119 | 76  | 1 | 43 | 393 | 4  | 122 | 1.00E-20 | 84.3 |
| TcMYB54 | ATMYB88  | 39.45 | 109 | 66  | 1 | 52 | 378 | 33 | 140 | 3.00E-20 | 84.3 |
| TcMYB55 | ATMYB4   | 64.29 | 154 | 53  | 1 | 1  | 456 | 1  | 154 | 2.00E-70 | 214  |
| TcMYB55 | ATMYB111 | 80.17 | 116 | 23  | 0 | 1  | 348 | 1  | 116 | 6.00E-69 | 212  |
| TcMYB55 | ATMYB12  | 81.03 | 116 | 22  | 0 | 1  | 348 | 1  | 116 | 4.00E-68 | 211  |
| TcMYB55 | MYB7     | 69.29 | 127 | 39  | 0 | 1  | 381 | 1  | 127 | 2.00E-66 | 203  |
| TcMYB55 | AtMYB6   | 68.5  | 127 | 40  | 0 | 1  | 381 | 1  | 127 | 2.00E-66 | 202  |
| TcMYB55 | ATMYB3   | 68.5  | 127 | 40  | 0 | 1  | 381 | 1  | 127 | 3.00E-66 | 202  |
| TcMYB55 | MYB8     | 67.46 | 126 | 41  | 0 | 1  | 378 | 1  | 126 | 8.00E-66 | 199  |
| TcMYB55 | ATMYB5   | 68.8  | 125 | 39  | 0 | 10 | 384 | 15 | 139 | 3.00E-65 | 199  |
| TcMYB55 | AtMYB32  | 62.41 | 141 | 53  | 0 | 1  | 423 | 1  | 141 | 4.00E-65 | 200  |
| TcMYB55 | AtMYB107 | 66.41 | 128 | 43  | 0 | 1  | 384 | 1  | 128 | 2.00E-63 | 197  |
| TcMYB55 | ATMYB11  | 41.91 | 272 | 150 | 5 | 1  | 792 | 1  | 249 | 3.00E-63 | 197  |
| TcMYB55 | AtMYB9   | 67.19 | 128 | 42  | 0 | 1  | 384 | 1  | 128 | 5.00E-63 | 196  |
| TcMYB55 | AtMYB17  | 40.15 | 274 | 159 | 5 | 1  | 807 | 1  | 269 | 7.00E-63 | 195  |
| TcMYB55 | AtMYB41  | 64.06 | 128 | 46  | 0 | 1  | 384 | 1  | 128 | 1.00E-61 | 191  |
| TcMYB55 | ATMYB29  | 36.47 | 329 | 195 | 7 | 1  | 945 | 1  | 322 | 2.00E-61 | 192  |
| TcMYB55 | ATMYB102 | 65.62 | 128 | 44  | 0 | 1  | 384 | 1  | 128 | 2.00E-61 | 192  |
| TcMYB55 | ATMYB16  | 64.84 | 128 | 45  | 0 | 1  | 384 | 1  | 128 | 2.00E-61 | 192  |
| TcMYB55 | ATMYB34  | 55.26 | 152 | 68  | 1 | 1  | 456 | 1  | 148 | 5.00E-61 | 190  |
| TcMYB55 | ATMYB80  | 56.58 | 152 | 66  | 0 | 1  | 456 | 1  | 152 | 6.00E-61 | 191  |
| TcMYB55 | AtMYB20  | 46.12 | 232 | 104 | 4 | 1  | 633 | 1  | 221 | 1.00E-60 | 188  |
| TcMYB55 | AtMYB93  | 64.84 | 128 | 45  | 0 | 1  | 384 | 1  | 128 | 5.00E-60 | 189  |
| TcMYB55 | AtMYB74  | 64.34 | 129 | 45  | 1 | 1  | 384 | 1  | 129 | 7.00E-60 | 188  |
| TcMYB55 | AtMYB40  | 38.63 | 277 | 169 | 7 | 1  | 828 | 1  | 257 | 2.00E-59 | 185  |
| TcMYB55 | ATMYB15  | 57.24 | 152 | 65  | 2 | 1  | 456 | 1  | 144 | 7.00E-59 | 184  |
| TcMYB55 | AtMYB43  | 65.62 | 128 | 44  | 0 | 1  | 384 | 1  | 128 | 1.00E-58 | 185  |
| TcMYB55 | ATMYB28  | 61.72 | 128 | 49  | 0 | 1  | 384 | 1  | 128 | 3.00E-58 | 185  |
| TcMYB55 | AtMYB76  | 43.23 | 229 | 117 | 5 | 1  | 648 | 1  | 223 | 9.00E-58 | 183  |
| TcMYB55 | AtMYB85  | 58.04 | 143 | 60  | 0 | 1  | 429 | 1  | 143 | 9.00E-58 | 181  |
| TcMYB55 | ATMYB106 | 63.71 | 124 | 45  | 0 | 10 | 381 | 47 | 170 | 2.00E-57 | 183  |
| TcMYB55 | AtMYB42  | 56.95 | 151 | 65  | 1 | 1  | 453 | 1  | 150 | 1.00E-56 | 178  |
| TcMYB55 | AtMYB49  | 63.28 | 128 | 47  | 0 | 1  | 384 | 1  | 128 | 2.00E-56 | 179  |
| TcMYB55 | ATMYB86  | 36.39 | 305 | 191 | 6 | 1  | 906 | 1  | 269 | 3.00E-56 | 179  |
| TcMYB55 | AtMYB51  | 60.94 | 128 | 49  | 1 | 1  | 381 | 1  | 128 | 5.00E-56 | 179  |
| TcMYB55 | ATMYB92  | 60.16 | 128 | 51  | 0 | 1  | 384 | 1  | 128 | 7.00E-56 | 178  |
| TcMYB55 | AtMYB53  | 60.16 | 128 | 51  | 0 | 1  | 384 | 1  | 128 | 7.00E-56 | 177  |
| TcMYB55 | ATMYB122 | 54.42 | 147 | 67  | 0 | 1  | 441 | 1  | 147 | 9.00E-56 | 177  |
| TcMYB55 | ATMYB13  | 65.52 | 116 | 40  | 0 | 1  | 348 | 1  | 116 | 1.00E-55 | 174  |
| TcMYB55 | ATMYB14  | 64.1  | 117 | 42  | 0 | 1  | 351 | 1  | 117 | 1.00E-55 | 174  |
| TcMYB55 | ATMYB61  | 52.05 | 171 | 79  | 2 | 1  | 504 | 1  | 171 | 2.00E-55 | 177  |
| TcMYB55 | AtMYB50  | 60.94 | 128 | 50  | 0 | 1  | 384 | 1  | 128 | 2.00E-54 | 173  |
| TcMYB55 | ATMYB35  | 42.08 | 221 | 114 | 4 | 1  | 621 | 1  | 221 | 3.00E-54 | 173  |
| TcMYB55 | ATMYB99  | 59.26 | 135 | 48  | 1 | 4  | 387 | 3  | 137 | 6.00E-53 | 167  |
| TcMYB55 | AtMYB60  | 42.44 | 205 | 118 | 3 | 1  | 615 | 1  | 193 | 8.00E-53 | 168  |
| TcMYB55 | ATMYB67  | 34.35 | 294 | 169 | 8 | 16 | 825 | 16 | 305 | 2.00E-52 | 168  |
| TcMYB55 | ATMYB95  | 57.03 | 128 | 55  | 0 | 1  | 384 | 1  | 128 | 2.00E-51 | 164  |
| TcMYB55 | ATMYB123 | 52.12 | 165 | 75  | 3 | 34 | 516 | 14 | 174 | 3.00E-51 | 164  |
| TcMYB55 | ATMYB31  | 61.21 | 116 | 45  | 0 | 1  | 348 | 1  | 116 | 3.00E-51 | 166  |
| TcMYB55 | AtMYB47  | 55.47 | 128 | 57  | 0 | 1  | 384 | 1  | 128 | 3.00E-51 | 164  |
| TcMYB55 | ATMYB55  | 57.55 | 139 | 47  | 1 | 1  | 381 | 1  | 139 | 7.00E-51 | 165  |
| TcMYB55 | ATMYB94  | 59.48 | 116 | 47  | 0 | 1  | 348 | 1  | 116 | 1.00E-50 | 164  |
| TcMYB55 | ATMYB72  | 62.07 | 116 | 44  | 0 | 4  | 351 | 4  | 119 | 1.00E-50 | 163  |
| TcMYB55 | ATMYB58  | 62.07 | 116 | 44  | 0 | 4  | 351 | 4  | 119 | 1.00E-50 | 162  |
| TcMYB55 | ATMYB63  | 52.63 | 152 | 71  | 2 | 4  | 456 | 4  | 151 | 1.00E-50 | 163  |
| TcMYB55 | AtMYB82  | 56.15 | 130 | 48  | 1 | 22 | 384 | 8  | 137 | 2.00E-50 | 159  |
| TcMYB55 | ATMYB96  | 49.67 | 151 | 76  | 1 | 1  | 453 | 1  | 137 | 3.00E-50 | 164  |
| TcMYB55 | ATMYB30  | 59.83 | 117 | 47  | 0 | 1  | 351 | 1  | 117 | 4.00E-50 | 162  |
| TcMYB55 | AtMYB103 | 49.02 | 153 | 78  | 1 | 1  | 459 | 1  | 150 | 7.00E-49 | 160  |
| TcMYB55 | AtMYB10  | 46.2  | 171 | 91  | 2 | 7  | 516 | 5  | 163 | 7.00E-49 | 157  |
| TcMYB55 | ATMYB66  | 46.45 | 155 | 78  | 3 | 37 | 486 | 17 | 169 | 1.00E-48 | 155  |
| TcMYB55 | ATMYB23  | 61.54 | 104 | 40  | 0 | 37 | 348 | 13 | 116 | 2.00E-47 | 152  |
| TcMYB55 | ATMYB87  | 30.36 | 303 | 195 | 6 | 1  | 861 | 1  | 289 | 3.00E-47 | 154  |
| TcMYB55 | AtMYB114 | 60    | 105 | 42  | 0 | 31 | 345 | 7  | 111 | 1.00E-46 | 147  |
| TcMYB55 | ATMYB75  | 52.38 | 126 | 52  | 1 | 31 | 384 | 7  | 132 | 2.00E-45 | 148  |
| TcMYB55 | ATMYB37  | 48.3  | 147 | 72  | 2 | 1  | 429 | 1  | 147 | 2.00E-45 | 150  |
| TcMYB55 | AtMYB113 | 35.19 | 287 | 179 | 8 | 1  | 840 | 1  | 243 | 3.00E-45 | 147  |
| TcMYB55 | AtMYB83  | 59.09 | 110 | 45  | 0 | 25 | 354 | 27 | 136 | 7.00E-45 | 149  |
| TcMYB55 | ATMYB90  | 60    | 105 | 42  | 0 | 31 | 345 | 7  | 111 | 7.00E-45 | 147  |
| TcMYB55 | ATMYB0   | 58.65 | 104 | 43  | 0 | 37 | 348 | 15 | 118 | 8.00E-45 | 146  |
| TcMYB55 | ATMYB26  | 54.4  | 125 | 48  | 1 | 1  | 348 | 1  | 125 | 2.00E-44 | 149  |
| TcMYB55 | ATMYB38  | 51.97 | 127 | 60  | 1 | 1  | 378 | 1  | 127 | 2.00E-44 | 147  |
| TcMYB55 | ATMYB46  | 58.1  | 105 | 44  | 0 | 34 | 348 | 18 | 122 | 8.00E-44 | 145  |
| TcMYB55 | AtMYB36  | 53.33 | 120 | 55  | 1 | 1  | 357 | 1  | 120 | 2.00E-43 | 145  |
| TcMYB55 | ATMYB101 | 58.1  | 105 | 44  | 0 | 31 | 345 | 17 | 121 | 3.00E-43 | 148  |
| TcMYB55 | ATMYB84  | 51.67 | 120 | 57  | 1 | 1  | 357 | 1  | 120 | 3.00E-43 | 144  |
| TcMYB55 | ATMYB68  | 52.5  | 120 | 56  | 1 | 1  | 357 | 1  | 120 | 4.00E-43 | 145  |
| TcMYB55 | ATMYB71  | 58.1  | 105 | 44  | 0 | 31 | 345 | 17 | 121 | 7.00E-43 | 142  |

|         |           |       |     |     |    |     |      |     |     |           |      |
|---------|-----------|-------|-----|-----|----|-----|------|-----|-----|-----------|------|
| TcMYB55 | AtMYB79   | 58.25 | 103 | 43  | 0  | 37  | 345  | 7   | 109 | 8.00E-43  | 142  |
| TcMYB55 | ATMYB120  | 58.72 | 109 | 45  | 0  | 22  | 348  | 22  | 130 | 3.00E-42  | 146  |
| TcMYB55 | ATMYB57   | 53.45 | 116 | 54  | 0  | 34  | 381  | 25  | 140 | 1.00E-41  | 137  |
| TcMYB55 | ATMYB121  | 55.77 | 104 | 46  | 0  | 31  | 342  | 26  | 129 | 2.00E-41  | 138  |
| TcMYB55 | AtMYB108  | 48.28 | 145 | 75  | 1  | 25  | 459  | 16  | 155 | 1.00E-40  | 138  |
| TcMYB55 | AtMYB116  | 50.43 | 115 | 57  | 0  | 37  | 381  | 19  | 133 | 1.00E-40  | 137  |
| TcMYB55 | AtMYB24   | 53.1  | 113 | 53  | 0  | 22  | 360  | 13  | 125 | 1.00E-40  | 134  |
| TcMYB55 | AtMYB62   | 51.69 | 118 | 57  | 0  | 34  | 387  | 19  | 136 | 3.00E-40  | 135  |
| TcMYB55 | AtMYB97   | 55.14 | 107 | 48  | 0  | 22  | 342  | 15  | 121 | 5.00E-40  | 137  |
| TcMYB55 | ATMYB3    | 51.82 | 110 | 53  | 0  | 34  | 363  | 20  | 129 | 5.00E-40  | 133  |
| TcMYB55 | AtMYB112  | 53.77 | 106 | 49  | 0  | 25  | 342  | 29  | 134 | 6.00E-40  | 134  |
| TcMYB55 | ATMYB33   | 54.81 | 104 | 47  | 0  | 34  | 345  | 32  | 135 | 1.00E-39  | 139  |
| TcMYB55 | ATMYB2    | 52.88 | 104 | 49  | 0  | 34  | 345  | 20  | 123 | 1.00E-39  | 134  |
| TcMYB55 | AtMYB81   | 53.77 | 106 | 49  | 0  | 25  | 342  | 17  | 122 | 1.00E-38  | 135  |
| TcMYB55 | ATMYB65   | 53.85 | 104 | 48  | 0  | 34  | 345  | 41  | 144 | 1.00E-38  | 136  |
| TcMYB55 | AtMYB18   | 56.31 | 103 | 45  | 0  | 37  | 345  | 11  | 113 | 7.00E-38  | 129  |
| TcMYB55 | ATMYB48   | 50.46 | 109 | 54  | 0  | 31  | 357  | 6   | 114 | 1.00E-36  | 125  |
| TcMYB55 | ATMYB59-3 | 50.47 | 107 | 53  | 0  | 37  | 357  | 9   | 115 | 2.00E-36  | 124  |
| TcMYB55 | AtMYB19   | 53.4  | 103 | 48  | 0  | 37  | 345  | 13  | 115 | 4.00E-36  | 124  |
| TcMYB55 | AtMYB27   | 54.81 | 104 | 47  | 0  | 34  | 345  | 9   | 112 | 9.00E-36  | 122  |
| TcMYB55 | ATMYB78   | 30.34 | 323 | 211 | 10 | 25  | 951  | 23  | 308 | 1.00E-35  | 124  |
| TcMYB55 | AtMYB45   | 48.04 | 102 | 53  | 0  | 37  | 342  | 19  | 120 | 3.00E-34  | 119  |
| TcMYB55 | AtMYB64   | 28.46 | 267 | 175 | 7  | 40  | 792  | 105 | 340 | 9.00E-29  | 107  |
| TcMYB55 | AtMYB104  | 43.52 | 108 | 61  | 1  | 40  | 363  | 18  | 124 | 2.00E-28  | 106  |
| TcMYB55 | ATMYB73   | 44.86 | 107 | 59  | 1  | 40  | 360  | 13  | 118 | 3.00E-28  | 104  |
| TcMYB55 | AtMYB70   | 44.86 | 107 | 59  | 1  | 40  | 360  | 13  | 118 | 5.00E-28  | 103  |
| TcMYB55 | AtMYB109  | 31.44 | 194 | 110 | 4  | 40  | 552  | 56  | 243 | 2.00E-27  | 103  |
| TcMYB55 | ATMYB44   | 42.02 | 119 | 65  | 3  | 40  | 384  | 6   | 123 | 1.00E-25  | 97.4 |
| TcMYB55 | AtMYB98   | 35.16 | 182 | 111 | 4  | 25  | 549  | 212 | 375 | 2.00E-25  | 98.6 |
| TcMYB55 | ATMYB118  | 38.36 | 146 | 90  | 3  | 25  | 462  | 184 | 309 | 2.00E-25  | 98.6 |
| TcMYB55 | ATMYB77   | 42.31 | 104 | 60  | 1  | 40  | 351  | 6   | 108 | 3.00E-25  | 96.3 |
| TcMYB55 | ATMYB25   | 43.4  | 106 | 60  | 1  | 40  | 357  | 50  | 154 | 3.00E-25  | 97.1 |
| TcMYB55 | ATMYB119  | 42.59 | 108 | 62  | 1  | 34  | 357  | 103 | 209 | 4.00E-25  | 97.4 |
| TcMYB55 | ATMYB119  | 31.03 | 58  | 39  | 1  | 190 | 360  | 102 | 159 | 1.00E-04  | 35.8 |
| TcMYB55 | AtMYB1    | 40.95 | 105 | 62  | 1  | 40  | 354  | 55  | 158 | 1.00E-24  | 95.9 |
| TcMYB55 | AtMYB115  | 39.62 | 106 | 64  | 1  | 40  | 357  | 158 | 262 | 1.00E-23  | 92.4 |
| TcMYB55 | ATMYB54   | 42.72 | 103 | 58  | 2  | 40  | 345  | 6   | 106 | 2.00E-23  | 90.1 |
| TcMYB55 | ATMYB105  | 37.93 | 116 | 69  | 2  | 19  | 357  | 97  | 211 | 3.00E-23  | 90.9 |
| TcMYB55 | ATMYB52   | 39.62 | 106 | 64  | 1  | 40  | 357  | 5   | 109 | 5.00E-23  | 89   |
| TcMYB55 | ATMYB110  | 38.83 | 103 | 63  | 1  | 40  | 348  | 67  | 168 | 3.00E-22  | 87.8 |
| TcMYB55 | AtMYB117  | 33.82 | 136 | 90  | 2  | 34  | 441  | 96  | 223 | 4.00E-22  | 88.2 |
| TcMYB55 | ATMYB69   | 37.38 | 107 | 67  | 1  | 25  | 345  | 14  | 119 | 9.00E-22  | 85.5 |
| TcMYB55 | AtMYB100  | 37.29 | 118 | 72  | 2  | 25  | 372  | 21  | 137 | 2.00E-20  | 81.6 |
| TcMYB55 | AtMYB56   | 37.17 | 113 | 66  | 2  | 22  | 345  | 82  | 193 | 6.00E-20  | 81.6 |
| TcMYB55 | ATMYB88   | 25    | 308 | 214 | 8  | 49  | 921  | 33  | 323 | 1.00E-19  | 82   |
| TcMYB55 | AtMYB124  | 31.94 | 144 | 93  | 2  | 49  | 465  | 28  | 170 | 1.00E-19  | 81.6 |
| TcMYB55 | ATMYB91   | 32.26 | 124 | 77  | 2  | 37  | 387  | 3   | 126 | 7.00E-19  | 79   |
| TcMYB55 | AtMYB89   | 36    | 100 | 64  | 1  | 43  | 342  | 57  | 155 | 2.00E-18  | 75.1 |
| TcMYB55 | AtMYB22   | 33.04 | 112 | 75  | 2  | 25  | 360  | 49  | 158 | 5.00E-16  | 69.3 |
| TcMYB56 | ATMYB16   | 59.84 | 249 | 94  | 3  | 1   | 729  | 1   | 226 | 7.00E-102 | 298  |
| TcMYB56 | ATMYB106  | 62.66 | 233 | 87  | 3  | 10  | 708  | 47  | 265 | 2.00E-100 | 297  |
| TcMYB56 | AtMYB17   | 50    | 286 | 136 | 7  | 1   | 837  | 1   | 279 | 4.00E-86  | 257  |
| TcMYB56 | AtMYB107  | 75.56 | 135 | 33  | 0  | 1   | 405  | 1   | 135 | 3.00E-79  | 240  |
| TcMYB56 | AtMYB93   | 55.25 | 219 | 77  | 4  | 1   | 594  | 1   | 216 | 3.00E-78  | 239  |
| TcMYB56 | AtMYB9    | 49.8  | 255 | 124 | 5  | 1   | 753  | 1   | 247 | 4.00E-77  | 235  |
| TcMYB56 | AtMYB53   | 53.64 | 220 | 95  | 3  | 1   | 639  | 1   | 219 | 4.00E-75  | 229  |
| TcMYB56 | AtMYB74   | 67.79 | 149 | 47  | 1  | 1   | 444  | 1   | 149 | 4.00E-74  | 227  |
| TcMYB56 | ATMYB102  | 65.56 | 151 | 50  | 1  | 1   | 447  | 1   | 151 | 2.00E-73  | 226  |
| TcMYB56 | AtMYB43   | 49.03 | 257 | 121 | 5  | 1   | 741  | 1   | 244 | 9.00E-73  | 224  |
| TcMYB56 | ATMYB92   | 72.39 | 134 | 37  | 0  | 1   | 402  | 1   | 134 | 2.00E-72  | 223  |
| TcMYB56 | AtMYB41   | 61.35 | 163 | 63  | 1  | 1   | 489  | 1   | 159 | 1.00E-71  | 219  |
| TcMYB56 | ATMYB96   | 43.53 | 278 | 148 | 6  | 1   | 807  | 1   | 267 | 6.00E-70  | 217  |
| TcMYB56 | ATMYB28   | 72.39 | 134 | 37  | 0  | 1   | 402  | 1   | 134 | 2.00E-69  | 216  |
| TcMYB56 | ATMYB29   | 70.14 | 144 | 43  | 1  | 1   | 432  | 1   | 143 | 3.00E-69  | 215  |
| TcMYB56 | AtMYB49   | 72.09 | 129 | 36  | 0  | 1   | 387  | 1   | 129 | 5.00E-69  | 214  |
| TcMYB56 | AtMYB20   | 73.08 | 130 | 35  | 0  | 1   | 390  | 1   | 130 | 2.00E-68  | 211  |
| TcMYB56 | ATMYB15   | 52.15 | 209 | 99  | 5  | 1   | 624  | 1   | 198 | 4.00E-68  | 210  |
| TcMYB56 | ATMYB14   | 77.97 | 118 | 26  | 0  | 1   | 354  | 1   | 118 | 2.00E-67  | 207  |
| TcMYB56 | AtMYB85   | 70.99 | 131 | 38  | 0  | 1   | 393  | 1   | 131 | 4.00E-67  | 207  |
| TcMYB56 | AtMYB76   | 71.21 | 132 | 38  | 0  | 1   | 396  | 1   | 132 | 8.00E-67  | 209  |
| TcMYB56 | AtMYB32   | 67.42 | 132 | 43  | 0  | 1   | 396  | 1   | 132 | 1.00E-66  | 206  |
| TcMYB56 | AtMYB51   | 36.51 | 367 | 218 | 8  | 1   | 1056 | 1   | 345 | 1.00E-66  | 209  |
| TcMYB56 | ATMYB34   | 66.91 | 136 | 45  | 0  | 1   | 408  | 1   | 136 | 4.00E-66  | 206  |
| TcMYB56 | MYB8      | 61.9  | 147 | 52  | 1  | 1   | 429  | 1   | 147 | 4.00E-66  | 202  |
| TcMYB56 | AtMYB60   | 59.35 | 155 | 63  | 1  | 1   | 465  | 1   | 150 | 6.00E-66  | 204  |
| TcMYB56 | AtMYB42   | 66.22 | 148 | 47  | 1  | 1   | 435  | 1   | 148 | 8.00E-66  | 204  |
| TcMYB56 | ATMYB30   | 56.89 | 167 | 72  | 1  | 1   | 501  | 1   | 166 | 2.00E-65  | 205  |
| TcMYB56 | AtMYB6    | 65.19 | 135 | 47  | 0  | 1   | 405  | 1   | 135 | 3.00E-65  | 201  |
| TcMYB56 | ATMYB94   | 56.14 | 171 | 71  | 3  | 1   | 501  | 1   | 170 | 4.00E-65  | 204  |
| TcMYB56 | MYB7      | 65.91 | 132 | 45  | 0  | 1   | 396  | 1   | 132 | 5.00E-65  | 202  |

|         |           |       |     |     |   |     |     |     |     |          |      |
|---------|-----------|-------|-----|-----|---|-----|-----|-----|-----|----------|------|
| TcMYB56 | ATMYB4    | 65.15 | 132 | 46  | 0 | 1   | 396 | 1   | 132 | 8.00E-65 | 202  |
| TcMYB56 | ATMYB80   | 67.69 | 130 | 42  | 0 | 1   | 390 | 1   | 130 | 1.00E-64 | 202  |
| TcMYB56 | ATMYB122  | 42.91 | 275 | 153 | 6 | 1   | 813 | 1   | 248 | 1.00E-64 | 203  |
| TcMYB56 | ATMYB3    | 64.39 | 132 | 47  | 0 | 1   | 396 | 1   | 132 | 2.00E-63 | 197  |
| TcMYB56 | ATMYB86   | 63.33 | 150 | 51  | 1 | 1   | 438 | 1   | 150 | 6.00E-63 | 199  |
| TcMYB56 | ATMYB31   | 50.79 | 189 | 86  | 3 | 1   | 546 | 1   | 188 | 9.00E-63 | 198  |
| TcMYB56 | AtMYB50   | 63.89 | 144 | 52  | 1 | 1   | 432 | 1   | 141 | 1.00E-62 | 197  |
| TcMYB56 | ATMYB13   | 75.86 | 116 | 28  | 0 | 1   | 348 | 1   | 116 | 1.00E-62 | 195  |
| TcMYB56 | ATMYB5    | 67.74 | 124 | 40  | 0 | 13  | 384 | 16  | 139 | 2.00E-62 | 194  |
| TcMYB56 | ATMYB35   | 64.12 | 131 | 47  | 0 | 1   | 393 | 1   | 131 | 2.00E-61 | 194  |
| TcMYB56 | ATMYB58   | 72.41 | 116 | 32  | 0 | 4   | 351 | 4   | 119 | 2.00E-61 | 192  |
| TcMYB56 | AtMYB40   | 54.78 | 157 | 70  | 1 | 1   | 468 | 1   | 157 | 5.00E-61 | 191  |
| TcMYB56 | ATMYB61   | 66.41 | 131 | 44  | 0 | 1   | 393 | 1   | 131 | 7.00E-61 | 194  |
| TcMYB56 | ATMYB72   | 56.1  | 164 | 72  | 2 | 4   | 495 | 4   | 156 | 2.00E-60 | 191  |
| TcMYB56 | ATMYB63   | 60.84 | 143 | 56  | 0 | 4   | 432 | 4   | 146 | 3.00E-60 | 190  |
| TcMYB56 | ATMYB95   | 53.04 | 181 | 75  | 1 | 1   | 513 | 1   | 181 | 3.00E-59 | 187  |
| TcMYB56 | ATMYB111  | 69.83 | 116 | 35  | 0 | 1   | 348 | 1   | 116 | 6.00E-59 | 188  |
| TcMYB56 | ATMYB99   | 62.41 | 133 | 43  | 1 | 4   | 381 | 3   | 135 | 1.00E-58 | 184  |
| TcMYB56 | AtMYB10   | 57.72 | 149 | 63  | 1 | 7   | 453 | 5   | 150 | 8.00E-58 | 182  |
| TcMYB56 | AtMYB47   | 53.94 | 165 | 74  | 1 | 1   | 489 | 1   | 165 | 9.00E-58 | 183  |
| TcMYB56 | ATMYB11   | 68.97 | 116 | 36  | 0 | 1   | 348 | 1   | 116 | 4.00E-57 | 184  |
| TcMYB56 | ATMYB12   | 67.24 | 116 | 38  | 0 | 1   | 348 | 1   | 116 | 6.00E-57 | 184  |
| TcMYB56 | ATMYB55   | 61.54 | 143 | 43  | 1 | 1   | 393 | 1   | 143 | 1.00E-56 | 182  |
| TcMYB56 | ATMYB67   | 62.81 | 121 | 45  | 0 | 16  | 378 | 16  | 136 | 1.00E-55 | 179  |
| TcMYB56 | AtMYB103  | 59.38 | 128 | 52  | 0 | 1   | 384 | 1   | 128 | 1.00E-52 | 173  |
| TcMYB56 | AtMYB36   | 54.43 | 158 | 63  | 2 | 1   | 447 | 1   | 158 | 2.00E-52 | 171  |
| TcMYB56 | ATMYB84   | 66.67 | 117 | 38  | 1 | 1   | 348 | 1   | 117 | 5.00E-52 | 169  |
| TcMYB56 | ATMYB37   | 61.79 | 123 | 46  | 1 | 1   | 366 | 1   | 123 | 5.00E-52 | 170  |
| TcMYB56 | ATMYB26   | 60.8  | 125 | 40  | 1 | 1   | 348 | 1   | 125 | 7.00E-52 | 171  |
| TcMYB56 | ATMYB87   | 56.55 | 145 | 61  | 3 | 1   | 429 | 1   | 143 | 2.00E-51 | 167  |
| TcMYB56 | ATMYB38   | 56    | 150 | 64  | 3 | 1   | 444 | 1   | 145 | 3.00E-51 | 167  |
| TcMYB56 | ATMYB68   | 53.5  | 157 | 62  | 3 | 1   | 438 | 1   | 155 | 6.00E-51 | 168  |
| TcMYB56 | ATMYB46   | 57.46 | 134 | 57  | 0 | 34  | 435 | 18  | 151 | 9.00E-50 | 162  |
| TcMYB56 | AtMYB83   | 68.81 | 109 | 34  | 0 | 22  | 348 | 26  | 134 | 1.00E-49 | 164  |
| TcMYB56 | ATMYB101  | 33.44 | 302 | 197 | 5 | 31  | 924 | 17  | 305 | 7.00E-48 | 163  |
| TcMYB56 | AtMYB81   | 51.45 | 138 | 67  | 1 | 25  | 438 | 17  | 153 | 8.00E-47 | 159  |
| TcMYB56 | AtMYB24   | 56.91 | 123 | 53  | 0 | 34  | 402 | 17  | 139 | 2.00E-46 | 152  |
| TcMYB56 | ATMYB66   | 62.5  | 104 | 39  | 0 | 37  | 348 | 17  | 120 | 5.00E-46 | 150  |
| TcMYB56 | ATMYB123  | 66.36 | 107 | 36  | 0 | 34  | 354 | 14  | 120 | 9.00E-46 | 151  |
| TcMYB56 | AtMYB112  | 57.89 | 114 | 48  | 0 | 25  | 366 | 29  | 142 | 2.00E-45 | 150  |
| TcMYB56 | ATMYB3    | 51.13 | 133 | 65  | 0 | 34  | 432 | 20  | 152 | 3.00E-45 | 149  |
| TcMYB56 | ATMYB23   | 61.54 | 104 | 40  | 0 | 37  | 348 | 13  | 116 | 3.00E-45 | 149  |
| TcMYB56 | ATMYB33   | 60.19 | 108 | 43  | 0 | 22  | 345 | 28  | 135 | 4.00E-45 | 156  |
| TcMYB56 | ATMYB57   | 50    | 134 | 67  | 0 | 34  | 435 | 25  | 158 | 9.00E-45 | 147  |
| TcMYB56 | AtMYB82   | 55.56 | 126 | 47  | 1 | 34  | 384 | 12  | 137 | 1.00E-44 | 146  |
| TcMYB56 | ATMYB71   | 62.86 | 105 | 39  | 0 | 31  | 345 | 17  | 121 | 2.00E-44 | 148  |
| TcMYB56 | ATMYB0    | 60.58 | 104 | 41  | 0 | 37  | 348 | 15  | 118 | 4.00E-44 | 146  |
| TcMYB56 | AtMYB79   | 63.11 | 103 | 38  | 0 | 37  | 345 | 7   | 109 | 5.00E-44 | 147  |
| TcMYB56 | ATMYB65   | 60.58 | 104 | 41  | 0 | 34  | 345 | 41  | 144 | 2.00E-43 | 152  |
| TcMYB56 | ATMYB120  | 60.91 | 110 | 43  | 1 | 34  | 363 | 26  | 134 | 2.00E-43 | 151  |
| TcMYB56 | AtMYB108  | 55.65 | 115 | 51  | 0 | 22  | 366 | 15  | 129 | 3.00E-43 | 147  |
| TcMYB56 | AtMYB19   | 55.65 | 124 | 49  | 1 | 37  | 390 | 13  | 136 | 4.00E-43 | 145  |
| TcMYB56 | ATMYB121  | 61.54 | 104 | 40  | 0 | 31  | 342 | 26  | 129 | 6.00E-43 | 144  |
| TcMYB56 | AtMYB114  | 60    | 105 | 42  | 0 | 31  | 345 | 7   | 111 | 1.00E-42 | 139  |
| TcMYB56 | AtMYB116  | 54.78 | 115 | 52  | 0 | 37  | 381 | 19  | 133 | 1.00E-42 | 144  |
| TcMYB56 | ATMYB75   | 50    | 142 | 54  | 2 | 31  | 405 | 7   | 148 | 3.00E-42 | 142  |
| TcMYB56 | AtMYB45   | 46.71 | 152 | 64  | 2 | 37  | 441 | 19  | 170 | 3.00E-42 | 142  |
| TcMYB56 | AtMYB97   | 55.36 | 112 | 50  | 1 | 28  | 363 | 17  | 127 | 1.00E-41 | 144  |
| TcMYB56 | AtMYB18   | 59.43 | 106 | 43  | 0 | 37  | 354 | 11  | 116 | 2.00E-41 | 140  |
| TcMYB56 | ATMYB2    | 49.19 | 124 | 63  | 0 | 34  | 405 | 20  | 143 | 4.00E-41 | 139  |
| TcMYB56 | ATMYB90   | 50.68 | 148 | 55  | 3 | 31  | 420 | 7   | 154 | 5.00E-41 | 139  |
| TcMYB56 | AtMYB62   | 53.45 | 116 | 54  | 0 | 34  | 381 | 19  | 134 | 3.00E-40 | 137  |
| TcMYB56 | AtMYB113  | 54.78 | 115 | 52  | 1 | 1   | 345 | 1   | 111 | 2.00E-39 | 134  |
| TcMYB56 | ATMYB48   | 54.29 | 105 | 48  | 0 | 31  | 345 | 6   | 110 | 1.00E-38 | 132  |
| TcMYB56 | ATMYB59-3 | 54.37 | 103 | 47  | 0 | 37  | 345 | 9   | 111 | 3.00E-38 | 131  |
| TcMYB56 | AtMYB27   | 57.69 | 104 | 44  | 0 | 34  | 345 | 9   | 112 | 4.00E-38 | 130  |
| TcMYB56 | ATMYB78   | 47.29 | 129 | 54  | 1 | 22  | 366 | 22  | 150 | 7.00E-38 | 132  |
| TcMYB56 | AtMYB104  | 47.22 | 108 | 57  | 1 | 40  | 363 | 18  | 124 | 6.00E-31 | 114  |
| TcMYB56 | AtMYB70   | 48.6  | 107 | 55  | 1 | 40  | 360 | 13  | 118 | 7.00E-30 | 110  |
| TcMYB56 | ATMYB73   | 47.66 | 107 | 56  | 1 | 40  | 360 | 13  | 118 | 2.00E-29 | 109  |
| TcMYB56 | ATMYB44   | 42.52 | 127 | 69  | 3 | 40  | 408 | 6   | 131 | 2.00E-28 | 106  |
| TcMYB56 | ATMYB119  | 40.91 | 132 | 78  | 2 | 34  | 429 | 103 | 228 | 8.00E-28 | 106  |
| TcMYB56 | ATMYB77   | 46.15 | 104 | 56  | 1 | 40  | 351 | 6   | 108 | 1.00E-27 | 103  |
| TcMYB56 | ATMYB25   | 49.02 | 102 | 52  | 1 | 40  | 345 | 50  | 150 | 9.00E-27 | 102  |
| TcMYB56 | AtMYB98   | 45.45 | 110 | 60  | 1 | 25  | 354 | 212 | 320 | 1.00E-26 | 103  |
| TcMYB56 | AtMYB1    | 47.17 | 106 | 52  | 2 | 40  | 345 | 55  | 155 | 2.00E-26 | 102  |
| TcMYB56 | AtMYB64   | 42.86 | 105 | 60  | 1 | 40  | 354 | 105 | 208 | 4.00E-26 | 101  |
| TcMYB56 | ATMYB118  | 44.64 | 112 | 60  | 2 | 25  | 354 | 184 | 292 | 5.00E-26 | 101  |
| TcMYB56 | ATMYB118  | 30    | 60  | 41  | 1 | 184 | 360 | 184 | 243 | 1.00E-04 | 35.8 |
| TcMYB56 | ATMYB52   | 45.1  | 102 | 56  | 1 | 40  | 345 | 5   | 105 | 8.00E-26 | 97.8 |

|         |          |       |     |     |   |    |     |     |     |          |      |
|---------|----------|-------|-----|-----|---|----|-----|-----|-----|----------|------|
| TcMYB56 | ATMYB54  | 39.86 | 138 | 80  | 3 | 40 | 444 | 6   | 140 | 3.00E-25 | 96.3 |
| TcMYB56 | AtMYB115 | 43.69 | 103 | 58  | 2 | 40 | 348 | 158 | 258 | 5.00E-25 | 97.8 |
| TcMYB56 | AtMYB109 | 45.28 | 106 | 58  | 1 | 40 | 357 | 56  | 160 | 1.00E-24 | 97.4 |
| TcMYB56 | ATMYB105 | 33.12 | 160 | 96  | 4 | 25 | 471 | 102 | 256 | 2.00E-23 | 92.4 |
| TcMYB56 | ATMYB69  | 38.32 | 107 | 66  | 1 | 25 | 345 | 14  | 119 | 9.00E-23 | 89.4 |
| TcMYB56 | AtMYB117 | 41.35 | 104 | 61  | 1 | 34 | 345 | 96  | 198 | 2.00E-22 | 90.1 |
| TcMYB56 | AtMYB100 | 38.14 | 118 | 71  | 2 | 25 | 372 | 21  | 137 | 4.00E-21 | 84.3 |
| TcMYB56 | AtMYB56  | 40.2  | 102 | 61  | 1 | 40 | 345 | 93  | 193 | 1.00E-20 | 84.7 |
| TcMYB56 | AtMYB89  | 35.45 | 110 | 71  | 1 | 43 | 372 | 57  | 165 | 1.00E-19 | 79   |
| TcMYB56 | ATMYB110 | 26.9  | 197 | 127 | 6 | 40 | 579 | 67  | 261 | 2.00E-19 | 80.5 |
| TcMYB56 | ATMYB91  | 35.64 | 101 | 63  | 1 | 49 | 345 | 7   | 107 | 6.00E-18 | 77   |
| TcMYB56 | AtMYB22  | 33.93 | 112 | 74  | 1 | 25 | 360 | 49  | 158 | 2.00E-17 | 74.3 |
| TcMYB56 | ATMYB88  | 38.38 | 99  | 61  | 1 | 49 | 345 | 33  | 130 | 6.00E-17 | 74.7 |
| TcMYB56 | AtMYB124 | 38.38 | 99  | 61  | 1 | 49 | 345 | 28  | 125 | 4.00E-16 | 72   |
| TcMYB57 | ATMYB23  | 65.42 | 107 | 37  | 0 | 19 | 339 | 10  | 116 | 1.00E-53 | 167  |
| TcMYB57 | ATMYB66  | 58.4  | 125 | 52  | 1 | 19 | 393 | 14  | 131 | 6.00E-53 | 165  |
| TcMYB57 | ATMYB123 | 55.56 | 144 | 62  | 1 | 10 | 435 | 9   | 152 | 3.00E-52 | 165  |
| TcMYB57 | AtMYB82  | 63.96 | 111 | 40  | 0 | 31 | 363 | 14  | 124 | 5.00E-52 | 162  |
| TcMYB57 | MYB7     | 57.04 | 135 | 48  | 1 | 16 | 390 | 9   | 143 | 2.00E-51 | 163  |
| TcMYB57 | ATMYB3   | 67.31 | 104 | 34  | 0 | 28 | 339 | 13  | 116 | 2.00E-50 | 160  |
| TcMYB57 | AtMYB32  | 50.34 | 149 | 72  | 2 | 28 | 468 | 13  | 160 | 3.00E-50 | 160  |
| TcMYB57 | AtMYB6   | 65.38 | 104 | 36  | 0 | 28 | 339 | 13  | 116 | 6.00E-50 | 158  |
| TcMYB57 | ATMYB4   | 60.83 | 120 | 45  | 1 | 28 | 381 | 13  | 132 | 1.00E-49 | 159  |
| TcMYB57 | ATMYB0   | 62.62 | 107 | 40  | 0 | 25 | 345 | 14  | 120 | 2.00E-49 | 157  |
| TcMYB57 | ATMYB5   | 68    | 100 | 32  | 0 | 40 | 339 | 28  | 127 | 5.00E-49 | 156  |
| TcMYB57 | AtMYB114 | 69.7  | 99  | 30  | 0 | 40 | 336 | 13  | 111 | 2.00E-48 | 151  |
| TcMYB57 | MYB8     | 61.54 | 104 | 40  | 0 | 28 | 339 | 13  | 116 | 5.00E-48 | 152  |
| TcMYB57 | AtMYB49  | 70    | 100 | 30  | 0 | 40 | 339 | 17  | 116 | 6.00E-48 | 155  |
| TcMYB57 | ATMYB46  | 52.17 | 138 | 66  | 1 | 37 | 450 | 22  | 158 | 3.00E-47 | 152  |
| TcMYB57 | AtMYB74  | 67    | 100 | 33  | 0 | 40 | 339 | 18  | 117 | 4.00E-47 | 154  |
| TcMYB57 | ATMYB86  | 35.42 | 271 | 165 | 6 | 16 | 798 | 9   | 264 | 5.00E-47 | 154  |
| TcMYB57 | AtMYB51  | 36.23 | 276 | 170 | 6 | 40 | 849 | 18  | 278 | 1.00E-46 | 153  |
| TcMYB57 | ATMYB75  | 61.54 | 117 | 38  | 1 | 40 | 369 | 13  | 129 | 2.00E-46 | 150  |
| TcMYB57 | ATMYB102 | 35.23 | 281 | 162 | 6 | 40 | 822 | 17  | 288 | 2.00E-46 | 152  |
| TcMYB57 | AtMYB41  | 66    | 100 | 34  | 0 | 40 | 339 | 17  | 116 | 4.00E-46 | 150  |
| TcMYB57 | ATMYB12  | 65    | 100 | 35  | 0 | 40 | 339 | 17  | 116 | 4.00E-46 | 152  |
| TcMYB57 | ATMYB106 | 37.94 | 253 | 157 | 5 | 40 | 798 | 60  | 281 | 6.00E-46 | 152  |
| TcMYB57 | ATMYB111 | 64    | 100 | 36  | 0 | 40 | 339 | 17  | 116 | 6.00E-46 | 151  |
| TcMYB57 | ATMYB90  | 43.81 | 194 | 91  | 5 | 40 | 567 | 13  | 192 | 1.00E-45 | 147  |
| TcMYB57 | ATMYB67  | 51.52 | 132 | 58  | 1 | 16 | 393 | 19  | 150 | 1.00E-45 | 149  |
| TcMYB57 | ATMYB15  | 47.86 | 140 | 73  | 0 | 40 | 459 | 17  | 156 | 2.00E-45 | 148  |
| TcMYB57 | AtMYB107 | 65    | 100 | 35  | 0 | 40 | 339 | 17  | 116 | 2.00E-45 | 149  |
| TcMYB57 | ATMYB11  | 62.75 | 102 | 38  | 0 | 40 | 345 | 17  | 118 | 3.00E-45 | 149  |
| TcMYB57 | AtMYB19  | 34.04 | 285 | 163 | 9 | 13 | 792 | 8   | 266 | 6.00E-45 | 146  |
| TcMYB57 | ATMYB80  | 60    | 110 | 44  | 0 | 16 | 345 | 9   | 118 | 7.00E-45 | 147  |
| TcMYB57 | AtMYB53  | 64    | 100 | 36  | 0 | 40 | 339 | 17  | 116 | 1.00E-44 | 147  |
| TcMYB57 | AtMYB50  | 32.32 | 297 | 173 | 7 | 16 | 822 | 9   | 292 | 1.00E-44 | 147  |
| TcMYB57 | AtMYB83  | 54.62 | 119 | 54  | 0 | 37 | 393 | 34  | 152 | 2.00E-44 | 147  |
| TcMYB57 | AtMYB60  | 35.53 | 228 | 139 | 3 | 40 | 699 | 17  | 243 | 2.00E-44 | 145  |
| TcMYB57 | ATMYB16  | 67    | 100 | 33  | 0 | 40 | 339 | 17  | 116 | 2.00E-44 | 146  |
| TcMYB57 | ATMYB94  | 58.72 | 109 | 45  | 0 | 40 | 366 | 17  | 125 | 3.00E-44 | 146  |
| TcMYB57 | ATMYB28  | 54.14 | 133 | 61  | 2 | 40 | 438 | 17  | 145 | 4.00E-44 | 147  |
| TcMYB57 | AtMYB17  | 63    | 100 | 37  | 0 | 40 | 339 | 17  | 116 | 5.00E-44 | 145  |
| TcMYB57 | ATMYB61  | 53.17 | 126 | 57  | 1 | 16 | 387 | 9   | 134 | 6.00E-44 | 146  |
| TcMYB57 | AtMYB113 | 65.66 | 99  | 34  | 0 | 40 | 336 | 13  | 111 | 7.00E-44 | 143  |
| TcMYB57 | AtMYB9   | 64    | 100 | 36  | 0 | 40 | 339 | 17  | 116 | 8.00E-44 | 145  |
| TcMYB57 | ATMYB92  | 62    | 100 | 38  | 0 | 40 | 339 | 17  | 116 | 1.00E-43 | 145  |
| TcMYB57 | ATMYB34  | 62.14 | 103 | 39  | 0 | 40 | 348 | 17  | 119 | 1.00E-43 | 144  |
| TcMYB57 | ATMYB30  | 59.81 | 107 | 43  | 0 | 40 | 360 | 17  | 123 | 2.00E-43 | 144  |
| TcMYB57 | ATMYB31  | 64    | 100 | 36  | 0 | 40 | 339 | 17  | 116 | 2.00E-43 | 144  |
| TcMYB57 | AtMYB79  | 57.94 | 107 | 45  | 0 | 40 | 360 | 11  | 117 | 2.00E-43 | 142  |
| TcMYB57 | AtMYB76  | 65    | 100 | 35  | 0 | 40 | 339 | 17  | 116 | 2.00E-43 | 144  |
| TcMYB57 | ATMYB14  | 62    | 100 | 38  | 0 | 40 | 339 | 17  | 116 | 3.00E-43 | 141  |
| TcMYB57 | ATMYB96  | 55.08 | 118 | 53  | 0 | 40 | 393 | 17  | 134 | 3.00E-43 | 144  |
| TcMYB57 | ATMYB37  | 60    | 110 | 43  | 1 | 40 | 366 | 17  | 126 | 4.00E-43 | 143  |
| TcMYB57 | ATMYB29  | 63.11 | 103 | 38  | 0 | 40 | 348 | 17  | 119 | 4.00E-43 | 143  |
| TcMYB57 | ATMYB13  | 64    | 100 | 36  | 0 | 40 | 339 | 17  | 116 | 5.00E-43 | 140  |
| TcMYB57 | ATMYB35  | 35.41 | 257 | 159 | 6 | 16 | 765 | 9   | 242 | 6.00E-43 | 142  |
| TcMYB57 | AtMYB103 | 60.58 | 104 | 41  | 0 | 31 | 342 | 14  | 117 | 6.00E-43 | 144  |
| TcMYB57 | ATMYB71  | 52.99 | 117 | 55  | 1 | 40 | 390 | 23  | 135 | 1.00E-42 | 140  |
| TcMYB57 | ATMYB72  | 51.13 | 133 | 59  | 1 | 16 | 396 | 11  | 143 | 1.00E-42 | 141  |
| TcMYB57 | ATMYB95  | 47.92 | 144 | 75  | 1 | 40 | 471 | 17  | 159 | 2.00E-42 | 140  |
| TcMYB57 | AtMYB93  | 62    | 100 | 38  | 0 | 40 | 339 | 17  | 116 | 2.00E-42 | 142  |
| TcMYB57 | ATMYB63  | 56.36 | 110 | 48  | 0 | 40 | 369 | 19  | 128 | 3.00E-42 | 140  |
| TcMYB57 | ATMYB122 | 62    | 100 | 38  | 0 | 40 | 339 | 17  | 116 | 3.00E-42 | 141  |
| TcMYB57 | AtMYB42  | 47.77 | 157 | 82  | 3 | 40 | 510 | 17  | 161 | 4.00E-42 | 139  |
| TcMYB57 | ATMYB26  | 33.67 | 294 | 184 | 7 | 16 | 864 | 9   | 273 | 6.00E-42 | 141  |
| TcMYB57 | ATMYB121 | 53.85 | 117 | 54  | 1 | 40 | 390 | 32  | 146 | 9.00E-42 | 138  |
| TcMYB57 | ATMYB101 | 58.42 | 101 | 42  | 0 | 40 | 342 | 23  | 123 | 1.00E-41 | 142  |
| TcMYB57 | AtMYB116 | 59.63 | 109 | 44  | 0 | 40 | 366 | 23  | 131 | 1.00E-41 | 138  |

|         |           |       |     |     |   |     |     |     |     |          |      |
|---------|-----------|-------|-----|-----|---|-----|-----|-----|-----|----------|------|
| TcMYB57 | ATMYB58   | 57.14 | 105 | 45  | 0 | 40  | 354 | 19  | 123 | 2.00E-41 | 137  |
| TcMYB57 | ATMYB84   | 61.54 | 104 | 39  | 1 | 40  | 348 | 17  | 120 | 2.00E-41 | 138  |
| TcMYB57 | AtMYB18   | 59    | 100 | 41  | 0 | 37  | 336 | 14  | 113 | 2.00E-41 | 137  |
| TcMYB57 | AtMYB36   | 60.58 | 104 | 40  | 1 | 40  | 348 | 17  | 120 | 3.00E-41 | 138  |
| TcMYB57 | ATMYB59-3 | 40.52 | 153 | 91  | 1 | 16  | 474 | 5   | 153 | 3.00E-41 | 135  |
| TcMYB57 | ATMYB57   | 43.24 | 148 | 81  | 2 | 40  | 474 | 30  | 172 | 4.00E-41 | 134  |
| TcMYB57 | ATMYB55   | 54.55 | 121 | 43  | 1 | 16  | 342 | 9   | 129 | 5.00E-41 | 138  |
| TcMYB57 | ATMYB120  | 59.41 | 101 | 41  | 0 | 40  | 342 | 31  | 131 | 5.00E-41 | 141  |
| TcMYB57 | ATMYB87   | 58.65 | 104 | 42  | 1 | 40  | 348 | 17  | 120 | 7.00E-41 | 137  |
| TcMYB57 | ATMYB3    | 53.21 | 109 | 51  | 0 | 40  | 366 | 25  | 133 | 7.00E-41 | 134  |
| TcMYB57 | ATMYB68   | 55.08 | 118 | 52  | 2 | 40  | 390 | 17  | 131 | 1.00E-40 | 138  |
| TcMYB57 | AtMYB47   | 38.99 | 218 | 114 | 4 | 40  | 636 | 17  | 234 | 3.00E-40 | 134  |
| TcMYB57 | AtMYB27   | 44.08 | 152 | 76  | 1 | 22  | 450 | 8   | 159 | 4.00E-40 | 133  |
| TcMYB57 | AtMYB24   | 54.21 | 107 | 49  | 0 | 40  | 360 | 22  | 128 | 6.00E-40 | 132  |
| TcMYB57 | ATMYB38   | 30.37 | 270 | 171 | 6 | 40  | 798 | 17  | 280 | 6.00E-40 | 134  |
| TcMYB57 | AtMYB85   | 60    | 100 | 40  | 0 | 40  | 339 | 17  | 116 | 8.00E-40 | 133  |
| TcMYB57 | ATMYB48   | 46.72 | 137 | 72  | 2 | 28  | 435 | 7   | 139 | 9.00E-40 | 132  |
| TcMYB57 | AtMYB62   | 57.8  | 109 | 46  | 0 | 40  | 366 | 24  | 132 | 9.00E-40 | 133  |
| TcMYB57 | AtMYB45   | 54.55 | 99  | 45  | 0 | 37  | 333 | 22  | 120 | 1.00E-39 | 132  |
| TcMYB57 | AtMYB10   | 55.05 | 109 | 49  | 0 | 40  | 366 | 19  | 127 | 2.00E-39 | 131  |
| TcMYB57 | AtMYB112  | 48.53 | 136 | 69  | 2 | 40  | 444 | 37  | 170 | 3.00E-39 | 130  |
| TcMYB57 | ATMYB33   | 50.93 | 108 | 53  | 0 | 19  | 342 | 30  | 137 | 1.00E-38 | 135  |
| TcMYB57 | ATMYB2    | 47.83 | 115 | 59  | 1 | 40  | 381 | 25  | 139 | 2.00E-38 | 129  |
| TcMYB57 | AtMYB81   | 51.92 | 104 | 50  | 0 | 16  | 327 | 17  | 120 | 4.00E-38 | 132  |
| TcMYB57 | AtMYB108  | 34.39 | 253 | 155 | 7 | 40  | 765 | 24  | 269 | 4.00E-38 | 130  |
| TcMYB57 | AtMYB20   | 56.44 | 101 | 44  | 0 | 40  | 342 | 17  | 117 | 2.00E-37 | 127  |
| TcMYB57 | ATMYB65   | 50.5  | 101 | 50  | 0 | 40  | 342 | 46  | 146 | 2.00E-37 | 132  |
| TcMYB57 | ATMYB99   | 54.21 | 107 | 42  | 1 | 40  | 339 | 18  | 124 | 4.00E-37 | 125  |
| TcMYB57 | AtMYB43   | 57.43 | 101 | 43  | 0 | 40  | 342 | 17  | 117 | 5.00E-37 | 127  |
| TcMYB57 | AtMYB97   | 56.25 | 96  | 42  | 0 | 40  | 327 | 24  | 119 | 8.00E-37 | 128  |
| TcMYB57 | AtMYB40   | 34.23 | 222 | 135 | 5 | 40  | 672 | 17  | 234 | 5.00E-36 | 123  |
| TcMYB57 | AtMYB104  | 25.41 | 303 | 206 | 6 | 16  | 864 | 13  | 314 | 5.00E-35 | 123  |
| TcMYB57 | ATMYB78   | 48.06 | 129 | 52  | 2 | 40  | 381 | 31  | 159 | 3.00E-34 | 119  |
| TcMYB57 | ATMYB54   | 42.62 | 122 | 70  | 2 | 28  | 393 | 5   | 123 | 4.00E-30 | 107  |
| TcMYB57 | ATMYB52   | 43.75 | 112 | 63  | 1 | 28  | 363 | 4   | 114 | 3.00E-29 | 105  |
| TcMYB57 | ATMYB105  | 43.75 | 112 | 63  | 1 | 22  | 357 | 104 | 214 | 4.00E-29 | 106  |
| TcMYB57 | AtMYB115  | 39.13 | 138 | 82  | 3 | 40  | 447 | 161 | 296 | 5.00E-29 | 106  |
| TcMYB57 | AtMYB1    | 30.93 | 236 | 156 | 6 | 40  | 726 | 58  | 273 | 1.00E-28 | 106  |
| TcMYB57 | ATMYB73   | 50    | 96  | 48  | 1 | 40  | 327 | 16  | 110 | 7.00E-28 | 102  |
| TcMYB57 | ATMYB73   | 39.22 | 51  | 30  | 2 | 190 | 339 | 13  | 59  | 8.00E-05 | 35.8 |
| TcMYB57 | ATMYB69   | 36.17 | 141 | 89  | 3 | 22  | 441 | 16  | 149 | 1.00E-27 | 100  |
| TcMYB57 | AtMYB117  | 46.53 | 101 | 54  | 1 | 40  | 342 | 101 | 200 | 2.00E-27 | 102  |
| TcMYB57 | ATMYB25   | 49.48 | 97  | 48  | 2 | 40  | 327 | 53  | 147 | 3.00E-27 | 102  |
| TcMYB57 | AtMYB70   | 46.08 | 102 | 55  | 1 | 40  | 345 | 16  | 116 | 3.00E-27 | 100  |
| TcMYB57 | AtMYB70   | 31.03 | 58  | 39  | 1 | 190 | 360 | 13  | 70  | 2.00E-04 | 34.3 |
| TcMYB57 | AtMYB56   | 39.1  | 133 | 74  | 2 | 28  | 405 | 92  | 223 | 4.00E-27 | 100  |
| TcMYB57 | AtMYB109  | 51.04 | 96  | 47  | 1 | 40  | 327 | 59  | 153 | 9.00E-27 | 100  |
| TcMYB57 | AtMYB109  | 39.22 | 51  | 30  | 2 | 190 | 339 | 56  | 102 | 4.00E-05 | 37   |
| TcMYB57 | ATMYB44   | 46.08 | 102 | 55  | 1 | 40  | 345 | 9   | 109 | 2.00E-26 | 98.6 |
| TcMYB57 | ATMYB118  | 38.71 | 124 | 72  | 2 | 7   | 366 | 181 | 303 | 2.00E-26 | 100  |
| TcMYB57 | ATMYB110  | 40    | 110 | 66  | 1 | 28  | 357 | 66  | 174 | 5.00E-26 | 97.4 |
| TcMYB57 | AtMYB64   | 38.58 | 127 | 78  | 2 | 40  | 420 | 108 | 225 | 5.00E-25 | 96.3 |
| TcMYB57 | ATMYB119  | 44.09 | 93  | 52  | 1 | 40  | 318 | 108 | 199 | 5.00E-25 | 96.3 |
| TcMYB57 | ATMYB119  | 34    | 50  | 32  | 1 | 181 | 327 | 102 | 151 | 5.00E-06 | 39.7 |
| TcMYB57 | AtMYB98   | 39.09 | 110 | 67  | 1 | 40  | 369 | 220 | 328 | 1.00E-24 | 95.5 |
| TcMYB57 | AtMYB100  | 26.99 | 226 | 155 | 6 | 40  | 687 | 29  | 225 | 3.00E-24 | 91.3 |
| TcMYB57 | ATMYB77   | 42.16 | 102 | 59  | 1 | 40  | 345 | 9   | 109 | 5.00E-24 | 92   |
| TcMYB57 | ATMYB91   | 42.86 | 112 | 62  | 1 | 31  | 360 | 4   | 115 | 7.00E-24 | 92.4 |
| TcMYB57 | ATMYB88   | 41.46 | 123 | 72  | 4 | 40  | 408 | 33  | 148 | 2.00E-22 | 89.4 |
| TcMYB57 | AtMYB124  | 29.33 | 208 | 130 | 7 | 40  | 612 | 28  | 230 | 9.00E-22 | 87   |
| TcMYB57 | AtMYB22   | 34.62 | 104 | 68  | 2 | 10  | 321 | 47  | 148 | 3.00E-20 | 80.9 |
| TcMYB57 | AtMYB89   | 39.6  | 101 | 61  | 1 | 40  | 342 | 59  | 158 | 4.00E-20 | 79   |
| TcMYB58 | ATMYB4    | 59.05 | 210 | 73  | 3 | 1   | 591 | 1   | 207 | 2.00E-87 | 254  |
| TcMYB58 | ATMYB3    | 59.8  | 199 | 75  | 3 | 1   | 582 | 1   | 195 | 5.00E-83 | 242  |
| TcMYB58 | MYB7      | 60    | 205 | 74  | 4 | 1   | 591 | 1   | 199 | 1.00E-81 | 239  |
| TcMYB58 | AtMYB6    | 68.59 | 156 | 49  | 2 | 1   | 468 | 1   | 151 | 4.00E-80 | 234  |
| TcMYB58 | AtMYB32   | 58.08 | 198 | 82  | 2 | 1   | 591 | 1   | 194 | 1.00E-79 | 234  |
| TcMYB58 | MYB8      | 55.92 | 211 | 82  | 6 | 1   | 600 | 1   | 205 | 7.00E-78 | 227  |
| TcMYB58 | AtMYB9    | 66.42 | 137 | 46  | 1 | 1   | 411 | 1   | 134 | 2.00E-67 | 205  |
| TcMYB58 | AtMYB107  | 63.5  | 137 | 50  | 1 | 1   | 411 | 1   | 134 | 2.00E-65 | 199  |
| TcMYB58 | AtMYB85   | 50.79 | 189 | 85  | 3 | 1   | 543 | 1   | 188 | 1.00E-64 | 196  |
| TcMYB58 | ATMYB5    | 52.81 | 178 | 77  | 3 | 13  | 525 | 16  | 184 | 3.00E-64 | 194  |
| TcMYB58 | ATMYB92   | 65.62 | 128 | 44  | 0 | 1   | 384 | 1   | 128 | 5.00E-63 | 193  |
| TcMYB58 | AtMYB17   | 65.62 | 128 | 44  | 0 | 1   | 384 | 1   | 128 | 1.00E-62 | 191  |
| TcMYB58 | AtMYB50   | 49.49 | 196 | 99  | 2 | 1   | 588 | 1   | 185 | 1.00E-62 | 192  |
| TcMYB58 | ATMYB86   | 50    | 210 | 103 | 5 | 1   | 624 | 1   | 203 | 4.00E-62 | 192  |
| TcMYB58 | ATMYB111  | 74.14 | 116 | 30  | 0 | 1   | 348 | 1   | 116 | 4.00E-62 | 191  |
| TcMYB58 | AtMYB41   | 42.19 | 237 | 132 | 3 | 1   | 696 | 1   | 231 | 6.00E-62 | 189  |
| TcMYB58 | ATMYB102  | 64.84 | 128 | 45  | 0 | 1   | 384 | 1   | 128 | 7.00E-62 | 191  |
| TcMYB58 | ATMYB61   | 54.88 | 164 | 73  | 1 | 1   | 489 | 1   | 164 | 1.00E-61 | 191  |

|         |           |       |     |     |   |    |     |    |     |          |     |
|---------|-----------|-------|-----|-----|---|----|-----|----|-----|----------|-----|
| TcMYB58 | AtMYB42   | 47.83 | 184 | 96  | 1 | 1  | 552 | 1  | 180 | 2.00E-61 | 188 |
| TcMYB58 | ATMYB16   | 63.64 | 132 | 48  | 0 | 1  | 396 | 1  | 132 | 4.00E-61 | 188 |
| TcMYB58 | ATMYB12   | 73.28 | 116 | 31  | 0 | 1  | 348 | 1  | 116 | 5.00E-61 | 189 |
| TcMYB58 | AtMYB43   | 42.15 | 242 | 130 | 3 | 1  | 696 | 1  | 238 | 8.00E-61 | 187 |
| TcMYB58 | AtMYB93   | 63.28 | 128 | 47  | 0 | 1  | 384 | 1  | 128 | 2.00E-60 | 187 |
| TcMYB58 | ATMYB28   | 48.57 | 175 | 90  | 1 | 1  | 525 | 1  | 173 | 2.00E-60 | 187 |
| TcMYB58 | AtMYB74   | 62.79 | 129 | 47  | 1 | 1  | 384 | 1  | 129 | 3.00E-60 | 186 |
| TcMYB58 | AtMYB53   | 62.5  | 128 | 48  | 0 | 1  | 384 | 1  | 128 | 4.00E-60 | 185 |
| TcMYB58 | ATMYB34   | 62.12 | 132 | 50  | 0 | 1  | 396 | 1  | 132 | 7.00E-60 | 184 |
| TcMYB58 | ATMYB80   | 57.53 | 146 | 62  | 1 | 1  | 438 | 1  | 142 | 1.00E-59 | 184 |
| TcMYB58 | ATMYB29   | 47.67 | 193 | 101 | 3 | 1  | 579 | 1  | 174 | 2.00E-59 | 184 |
| TcMYB58 | ATMYB122  | 52.41 | 166 | 72  | 2 | 1  | 477 | 1  | 166 | 2.00E-59 | 184 |
| TcMYB58 | AtMYB51   | 39.23 | 260 | 132 | 5 | 1  | 702 | 1  | 260 | 2.00E-59 | 184 |
| TcMYB58 | ATMYB11   | 71.55 | 116 | 33  | 0 | 1  | 348 | 1  | 116 | 5.00E-59 | 183 |
| TcMYB58 | AtMYB49   | 64.84 | 128 | 45  | 0 | 1  | 384 | 1  | 128 | 1.00E-58 | 182 |
| TcMYB58 | AtMYB20   | 60.16 | 128 | 51  | 0 | 1  | 384 | 1  | 128 | 1.00E-58 | 181 |
| TcMYB58 | ATMYB13   | 60.9  | 133 | 52  | 1 | 1  | 399 | 1  | 132 | 5.00E-58 | 178 |
| TcMYB58 | ATMYB15   | 44.21 | 190 | 106 | 1 | 1  | 570 | 1  | 179 | 5.00E-58 | 179 |
| TcMYB58 | AtMYB40   | 53.05 | 164 | 76  | 3 | 1  | 489 | 1  | 159 | 5.00E-58 | 178 |
| TcMYB58 | ATMYB106  | 63.71 | 124 | 45  | 0 | 10 | 381 | 47 | 170 | 7.00E-58 | 182 |
| TcMYB58 | AtMYB76   | 40.95 | 232 | 137 | 3 | 1  | 696 | 1  | 209 | 2.00E-57 | 179 |
| TcMYB58 | ATMYB14   | 59.56 | 136 | 52  | 1 | 1  | 399 | 1  | 136 | 3.00E-57 | 176 |
| TcMYB58 | ATMYB55   | 53.8  | 171 | 67  | 3 | 1  | 477 | 1  | 166 | 4.00E-57 | 179 |
| TcMYB58 | ATMYB67   | 46.08 | 204 | 108 | 4 | 16 | 621 | 16 | 212 | 7.00E-57 | 177 |
| TcMYB58 | ATMYB99   | 59.26 | 135 | 48  | 1 | 4  | 387 | 3  | 137 | 1.00E-56 | 174 |
| TcMYB58 | ATMYB58   | 57.45 | 141 | 60  | 1 | 4  | 426 | 4  | 141 | 1.00E-56 | 175 |
| TcMYB58 | ATMYB72   | 47.12 | 191 | 101 | 3 | 4  | 576 | 4  | 177 | 2.00E-56 | 175 |
| TcMYB58 | AtMYB10   | 54.93 | 142 | 64  | 0 | 7  | 432 | 5  | 146 | 1.00E-55 | 172 |
| TcMYB58 | AtMYB103  | 42.01 | 219 | 121 | 2 | 1  | 639 | 1  | 218 | 3.00E-55 | 174 |
| TcMYB58 | AtMYB60   | 63.49 | 126 | 46  | 0 | 1  | 378 | 1  | 126 | 3.00E-55 | 172 |
| TcMYB58 | ATMYB63   | 66.09 | 115 | 39  | 0 | 4  | 348 | 4  | 118 | 3.00E-55 | 172 |
| TcMYB58 | ATMYB31   | 62.6  | 123 | 46  | 0 | 1  | 369 | 1  | 123 | 3.00E-54 | 171 |
| TcMYB58 | ATMYB35   | 56.25 | 128 | 56  | 0 | 1  | 384 | 1  | 128 | 3.00E-54 | 170 |
| TcMYB58 | ATMYB123  | 60.31 | 131 | 52  | 2 | 37 | 429 | 15 | 139 | 7.00E-54 | 167 |
| TcMYB58 | ATMYB30   | 64.23 | 123 | 44  | 0 | 1  | 369 | 1  | 123 | 8.00E-54 | 169 |
| TcMYB58 | ATMYB66   | 48.47 | 163 | 80  | 2 | 25 | 501 | 13 | 173 | 8.00E-54 | 166 |
| TcMYB58 | ATMYB94   | 55.92 | 152 | 56  | 2 | 1  | 423 | 1  | 152 | 1.00E-53 | 169 |
| TcMYB58 | AtMYB83   | 70.87 | 103 | 30  | 0 | 40 | 348 | 32 | 134 | 3.00E-53 | 169 |
| TcMYB58 | ATMYB87   | 49.4  | 168 | 81  | 3 | 1  | 492 | 1  | 165 | 7.00E-53 | 166 |
| TcMYB58 | ATMYB95   | 54.36 | 149 | 65  | 2 | 1  | 438 | 1  | 147 | 2.00E-52 | 164 |
| TcMYB58 | ATMYB26   | 47.67 | 172 | 81  | 3 | 1  | 489 | 1  | 162 | 2.00E-52 | 167 |
| TcMYB58 | ATMYB37   | 58.73 | 126 | 51  | 1 | 1  | 375 | 1  | 126 | 3.00E-52 | 166 |
| TcMYB58 | ATMYB96   | 65.52 | 116 | 40  | 0 | 1  | 348 | 1  | 116 | 7.00E-52 | 165 |
| TcMYB58 | ATMYB84   | 58.33 | 120 | 49  | 1 | 1  | 357 | 1  | 120 | 3.00E-51 | 162 |
| TcMYB58 | ATMYB46   | 66.99 | 103 | 34  | 0 | 40 | 348 | 20 | 122 | 7.00E-51 | 160 |
| TcMYB58 | ATMYB68   | 58.33 | 120 | 49  | 1 | 1  | 357 | 1  | 120 | 1.00E-50 | 162 |
| TcMYB58 | AtMYB36   | 59.17 | 120 | 48  | 1 | 1  | 357 | 1  | 120 | 1.00E-50 | 161 |
| TcMYB58 | ATMYB0    | 60.91 | 110 | 43  | 0 | 22 | 351 | 10 | 119 | 2.00E-50 | 158 |
| TcMYB58 | ATMYB23   | 63.11 | 103 | 38  | 0 | 40 | 348 | 14 | 116 | 3.00E-50 | 157 |
| TcMYB58 | AtMYB47   | 47.56 | 164 | 81  | 2 | 1  | 477 | 1  | 163 | 1.00E-49 | 157 |
| TcMYB58 | AtMYB114  | 65.69 | 102 | 35  | 0 | 40 | 345 | 10 | 111 | 2.00E-49 | 152 |
| TcMYB58 | ATMYB38   | 56.3  | 119 | 51  | 1 | 1  | 354 | 1  | 119 | 2.00E-49 | 157 |
| TcMYB58 | AtMYB82   | 63.21 | 106 | 39  | 0 | 40 | 357 | 14 | 119 | 1.00E-48 | 152 |
| TcMYB58 | ATMYB90   | 60.53 | 114 | 45  | 0 | 40 | 381 | 10 | 123 | 2.00E-47 | 150 |
| TcMYB58 | ATMYB75   | 64.71 | 102 | 36  | 0 | 40 | 345 | 10 | 111 | 3.00E-47 | 150 |
| TcMYB58 | ATMYB71   | 64.76 | 105 | 37  | 0 | 40 | 354 | 20 | 124 | 5.00E-47 | 150 |
| TcMYB58 | AtMYB19   | 64.15 | 106 | 38  | 0 | 34 | 351 | 12 | 117 | 1.00E-46 | 149 |
| TcMYB58 | ATMYB57   | 59.63 | 109 | 44  | 0 | 22 | 348 | 21 | 129 | 2.00E-46 | 147 |
| TcMYB58 | AtMYB79   | 51.77 | 141 | 68  | 1 | 40 | 462 | 8  | 142 | 2.00E-46 | 148 |
| TcMYB58 | ATMYB121  | 45.22 | 157 | 86  | 1 | 40 | 510 | 29 | 179 | 5.00E-46 | 148 |
| TcMYB58 | AtMYB113  | 42.02 | 188 | 98  | 2 | 40 | 570 | 10 | 197 | 4.00E-45 | 145 |
| TcMYB58 | AtMYB24   | 57.94 | 107 | 45  | 0 | 40 | 360 | 19 | 125 | 8.00E-45 | 143 |
| TcMYB58 | AtMYB18   | 63.3  | 109 | 39  | 1 | 28 | 351 | 7  | 115 | 1.00E-44 | 144 |
| TcMYB58 | ATMYB101  | 61.76 | 102 | 39  | 0 | 40 | 345 | 20 | 121 | 2.00E-44 | 149 |
| TcMYB58 | AtMYB112  | 56.8  | 125 | 52  | 2 | 40 | 408 | 34 | 155 | 3.00E-44 | 142 |
| TcMYB58 | AtMYB81   | 61.39 | 101 | 39  | 0 | 40 | 342 | 22 | 122 | 5.00E-44 | 146 |
| TcMYB58 | ATMYB3    | 59.41 | 101 | 41  | 0 | 40 | 342 | 22 | 122 | 9.00E-44 | 140 |
| TcMYB58 | AtMYB27   | 64.71 | 102 | 36  | 0 | 40 | 345 | 11 | 112 | 1.00E-43 | 140 |
| TcMYB58 | ATMYB120  | 63.11 | 103 | 38  | 0 | 40 | 348 | 28 | 130 | 2.00E-43 | 147 |
| TcMYB58 | AtMYB45   | 48.09 | 131 | 68  | 0 | 34 | 426 | 18 | 148 | 2.00E-43 | 141 |
| TcMYB58 | ATMYB2    | 35.56 | 239 | 142 | 5 | 22 | 702 | 16 | 243 | 2.00E-43 | 141 |
| TcMYB58 | AtMYB108  | 58.88 | 107 | 44  | 0 | 22 | 342 | 15 | 121 | 7.00E-43 | 141 |
| TcMYB58 | AtMYB97   | 60.4  | 101 | 40  | 0 | 40 | 342 | 21 | 121 | 1.00E-42 | 142 |
| TcMYB58 | ATMYB65   | 55.75 | 113 | 47  | 1 | 16 | 345 | 32 | 144 | 2.00E-42 | 144 |
| TcMYB58 | ATMYB33   | 57.84 | 102 | 43  | 0 | 40 | 345 | 34 | 135 | 2.00E-42 | 144 |
| TcMYB58 | AtMYB116  | 49.17 | 120 | 61  | 0 | 22 | 381 | 14 | 133 | 9.00E-42 | 137 |
| TcMYB58 | ATMYB48   | 42.95 | 156 | 84  | 3 | 22 | 474 | 4  | 152 | 1.00E-40 | 134 |
| TcMYB58 | AtMYB62   | 48.36 | 122 | 63  | 0 | 22 | 387 | 15 | 136 | 4.00E-40 | 133 |
| TcMYB58 | ATMYB59-3 | 54.9  | 102 | 46  | 0 | 40 | 345 | 10 | 111 | 2.00E-39 | 130 |
| TcMYB58 | ATMYB78   | 53.39 | 118 | 41  | 1 | 31 | 342 | 25 | 142 | 1.00E-38 | 130 |

|         |          |       |     |     |   |     |     |     |     |          |      |
|---------|----------|-------|-----|-----|---|-----|-----|-----|-----|----------|------|
| TcMYB58 | AtMYB104 | 48.51 | 101 | 52  | 0 | 40  | 342 | 18  | 118 | 3.00E-32 | 114  |
| TcMYB58 | ATMYB73  | 46.55 | 116 | 62  | 1 | 13  | 360 | 4   | 118 | 5.00E-31 | 110  |
| TcMYB58 | ATMYB73  | 25    | 80  | 59  | 1 | 199 | 435 | 13  | 92  | 8.00E-05 | 35.4 |
| TcMYB58 | ATMYB25  | 53.92 | 102 | 47  | 1 | 40  | 345 | 50  | 150 | 7.00E-31 | 110  |
| TcMYB58 | AtMYB70  | 49.09 | 110 | 56  | 1 | 31  | 360 | 10  | 118 | 1.00E-30 | 108  |
| TcMYB58 | AtMYB70  | 32.26 | 62  | 41  | 1 | 190 | 372 | 10  | 71  | 4.00E-05 | 36.2 |
| TcMYB58 | AtMYB1   | 50.47 | 107 | 53  | 1 | 31  | 351 | 52  | 157 | 1.00E-30 | 110  |
| TcMYB58 | AtMYB1   | 32.79 | 61  | 40  | 1 | 184 | 363 | 50  | 110 | 8.00E-06 | 38.5 |
| TcMYB58 | AtMYB115 | 34.92 | 189 | 123 | 6 | 40  | 606 | 158 | 330 | 2.00E-30 | 108  |
| TcMYB58 | ATMYB44  | 46.72 | 122 | 61  | 3 | 31  | 384 | 3   | 123 | 1.00E-29 | 106  |
| TcMYB58 | AtMYB98  | 44.35 | 115 | 64  | 1 | 40  | 384 | 217 | 330 | 1.00E-29 | 108  |
| TcMYB58 | ATMYB119 | 35.33 | 167 | 99  | 3 | 40  | 513 | 105 | 269 | 2.00E-29 | 107  |
| TcMYB58 | ATMYB77  | 47.62 | 105 | 55  | 1 | 31  | 345 | 3   | 106 | 4.00E-29 | 104  |
| TcMYB58 | AtMYB64  | 45.63 | 103 | 55  | 2 | 40  | 345 | 105 | 205 | 3.00E-28 | 103  |
| TcMYB58 | AtMYB64  | 25.81 | 62  | 45  | 1 | 199 | 381 | 105 | 166 | 1.00E-04 | 35   |
| TcMYB58 | ATMYB118 | 45.1  | 102 | 56  | 1 | 40  | 345 | 189 | 289 | 5.00E-28 | 103  |
| TcMYB58 | ATMYB118 | 32.14 | 56  | 37  | 1 | 199 | 363 | 189 | 244 | 4.00E-05 | 36.6 |
| TcMYB58 | AtMYB109 | 50.98 | 102 | 50  | 1 | 40  | 345 | 56  | 156 | 1.00E-27 | 102  |
| TcMYB58 | AtMYB109 | 32.26 | 62  | 41  | 1 | 199 | 381 | 56  | 117 | 4.00E-04 | 33.5 |
| TcMYB58 | ATMYB54  | 41.35 | 104 | 60  | 2 | 37  | 345 | 5   | 106 | 7.00E-26 | 94.7 |
| TcMYB58 | ATMYB52  | 38.89 | 126 | 77  | 3 | 37  | 414 | 4   | 122 | 2.00E-25 | 94   |
| TcMYB58 | ATMYB105 | 38.79 | 116 | 70  | 2 | 37  | 381 | 106 | 219 | 5.00E-25 | 94   |
| TcMYB58 | AtMYB117 | 42.72 | 103 | 58  | 2 | 40  | 345 | 98  | 198 | 3.00E-24 | 92.4 |
| TcMYB58 | AtMYB100 | 39.09 | 110 | 67  | 1 | 31  | 360 | 23  | 131 | 2.00E-23 | 88.2 |
| TcMYB58 | ATMYB69  | 33.33 | 132 | 88  | 2 | 40  | 435 | 19  | 148 | 6.00E-23 | 87   |
| TcMYB58 | ATMYB110 | 38.46 | 104 | 64  | 1 | 37  | 348 | 66  | 168 | 1.00E-22 | 87.4 |
| TcMYB58 | AtMYB56  | 39.81 | 103 | 62  | 1 | 37  | 345 | 92  | 193 | 3.00E-22 | 86.3 |
| TcMYB58 | AtMYB89  | 38    | 100 | 62  | 1 | 43  | 342 | 57  | 155 | 4.00E-20 | 78.2 |
| TcMYB58 | AtMYB22  | 34.62 | 104 | 68  | 1 | 31  | 342 | 51  | 152 | 2.00E-19 | 77.4 |
| TcMYB58 | AtMYB22  | 25    | 52  | 39  | 0 | 184 | 339 | 49  | 100 | 2.00E-04 | 33.9 |
| TcMYB58 | ATMYB91  | 36.36 | 99  | 61  | 1 | 34  | 324 | 2   | 100 | 2.00E-18 | 75.9 |
| TcMYB58 | AtMYB124 | 31.45 | 124 | 81  | 2 | 31  | 390 | 22  | 144 | 8.00E-17 | 71.6 |
| TcMYB58 | ATMYB88  | 34.29 | 105 | 69  | 1 | 31  | 345 | 27  | 130 | 4.00E-16 | 69.7 |
| TcMYB59 | ATMYB5   | 62.71 | 118 | 44  | 0 | 10  | 363 | 22  | 139 | 3.00E-55 | 171  |
| TcMYB59 | ATMYB123 | 70.37 | 108 | 32  | 0 | 4   | 327 | 11  | 118 | 5.00E-55 | 170  |
| TcMYB59 | AtMYB74  | 53.9  | 141 | 65  | 1 | 4   | 426 | 10  | 148 | 1.00E-53 | 169  |
| TcMYB59 | ATMYB102 | 53.42 | 146 | 68  | 0 | 4   | 441 | 9   | 154 | 5.00E-53 | 168  |
| TcMYB59 | AtMYB82  | 51.33 | 150 | 71  | 2 | 13  | 456 | 12  | 157 | 1.00E-51 | 160  |
| TcMYB59 | AtMYB17  | 57.25 | 131 | 53  | 1 | 10  | 393 | 11  | 141 | 2.00E-51 | 162  |
| TcMYB59 | AtMYB41  | 50.34 | 149 | 64  | 1 | 4   | 420 | 9   | 157 | 3.00E-51 | 161  |
| TcMYB59 | ATMYB66  | 53.52 | 142 | 65  | 1 | 19  | 441 | 18  | 159 | 1.00E-50 | 157  |
| TcMYB59 | ATMYB111 | 55.15 | 136 | 55  | 1 | 10  | 399 | 11  | 146 | 2.00E-50 | 161  |
| TcMYB59 | ATMYB23  | 56.3  | 135 | 59  | 1 | 19  | 423 | 14  | 146 | 2.00E-50 | 157  |
| TcMYB59 | ATMYB3   | 51.06 | 141 | 69  | 1 | 13  | 435 | 12  | 150 | 3.00E-50 | 158  |
| TcMYB59 | AtMYB53  | 57.98 | 119 | 50  | 0 | 10  | 366 | 11  | 129 | 3.00E-50 | 159  |
| TcMYB59 | ATMYB16  | 56.59 | 129 | 56  | 1 | 10  | 396 | 11  | 136 | 7.00E-50 | 159  |
| TcMYB59 | AtMYB49  | 47.74 | 155 | 79  | 1 | 13  | 471 | 12  | 166 | 8.00E-50 | 159  |
| TcMYB59 | ATMYB92  | 53.42 | 146 | 64  | 2 | 10  | 435 | 11  | 151 | 8.00E-50 | 159  |
| TcMYB59 | MYB7     | 61.26 | 111 | 43  | 0 | 13  | 345 | 12  | 122 | 2.00E-49 | 156  |
| TcMYB59 | ATMYB30  | 48.57 | 140 | 72  | 0 | 4   | 423 | 9   | 148 | 2.00E-49 | 158  |
| TcMYB59 | ATMYB4   | 48.1  | 158 | 82  | 3 | 16  | 489 | 13  | 159 | 7.00E-49 | 155  |
| TcMYB59 | AtMYB114 | 61.9  | 105 | 40  | 0 | 10  | 324 | 7   | 111 | 7.00E-49 | 150  |
| TcMYB59 | AtMYB113 | 49.37 | 158 | 74  | 4 | 10  | 465 | 7   | 158 | 7.00E-49 | 154  |
| TcMYB59 | ATMYB90  | 57.72 | 123 | 52  | 1 | 10  | 378 | 7   | 124 | 8.00E-49 | 154  |
| TcMYB59 | ATMYB106 | 41.92 | 198 | 114 | 3 | 4   | 594 | 52  | 235 | 1.00E-48 | 157  |
| TcMYB59 | AtMYB107 | 56.3  | 119 | 52  | 0 | 10  | 366 | 11  | 129 | 1.00E-48 | 155  |
| TcMYB59 | AtMYB6   | 48.95 | 143 | 73  | 0 | 16  | 444 | 13  | 155 | 2.00E-48 | 153  |
| TcMYB59 | AtMYB32  | 53.54 | 127 | 59  | 0 | 16  | 396 | 13  | 139 | 2.00E-48 | 154  |
| TcMYB59 | ATMYB86  | 47.03 | 185 | 98  | 2 | 13  | 567 | 12  | 191 | 2.00E-48 | 156  |
| TcMYB59 | ATMYB0   | 39.44 | 213 | 126 | 2 | 19  | 648 | 16  | 227 | 3.00E-48 | 152  |
| TcMYB59 | ATMYB13  | 53.57 | 140 | 64  | 2 | 10  | 426 | 11  | 147 | 4.00E-48 | 152  |
| TcMYB59 | ATMYB15  | 51.06 | 141 | 66  | 2 | 10  | 423 | 11  | 147 | 6.00E-48 | 153  |
| TcMYB59 | ATMYB75  | 48.1  | 158 | 77  | 4 | 10  | 468 | 7   | 158 | 6.00E-48 | 152  |
| TcMYB59 | ATMYB12  | 61.32 | 106 | 41  | 0 | 10  | 327 | 11  | 116 | 2.00E-47 | 154  |
| TcMYB59 | AtMYB9   | 56.3  | 119 | 52  | 0 | 10  | 366 | 11  | 129 | 6.00E-47 | 152  |
| TcMYB59 | ATMYB14  | 59.81 | 107 | 43  | 0 | 10  | 330 | 11  | 117 | 7.00E-47 | 149  |
| TcMYB59 | ATMYB46  | 36.59 | 246 | 142 | 6 | 13  | 708 | 18  | 250 | 1.00E-46 | 149  |
| TcMYB59 | AtMYB50  | 50    | 144 | 72  | 0 | 13  | 444 | 12  | 155 | 1.00E-46 | 150  |
| TcMYB59 | ATMYB58  | 47.65 | 149 | 75  | 2 | 13  | 450 | 14  | 159 | 1.00E-46 | 149  |
| TcMYB59 | AtMYB93  | 55.46 | 119 | 53  | 0 | 10  | 366 | 11  | 129 | 2.00E-46 | 151  |
| TcMYB59 | AtMYB60  | 44.97 | 149 | 79  | 1 | 10  | 447 | 11  | 159 | 2.00E-46 | 149  |
| TcMYB59 | AtMYB51  | 59.82 | 112 | 45  | 0 | 10  | 345 | 12  | 123 | 2.00E-46 | 151  |
| TcMYB59 | ATMYB95  | 49.32 | 146 | 68  | 1 | 10  | 429 | 11  | 156 | 3.00E-46 | 148  |
| TcMYB59 | ATMYB72  | 41.33 | 196 | 111 | 3 | 13  | 588 | 14  | 207 | 3.00E-46 | 149  |
| TcMYB59 | ATMYB34  | 55.08 | 118 | 53  | 0 | 10  | 363 | 11  | 128 | 5.00E-46 | 148  |
| TcMYB59 | MYB8     | 49.19 | 124 | 63  | 0 | 13  | 384 | 12  | 135 | 6.00E-46 | 145  |
| TcMYB59 | ATMYB122 | 36.64 | 232 | 146 | 4 | 10  | 702 | 11  | 233 | 2.00E-45 | 148  |
| TcMYB59 | ATMYB63  | 47.3  | 148 | 78  | 1 | 13  | 456 | 14  | 156 | 3.00E-45 | 146  |
| TcMYB59 | ATMYB84  | 55.36 | 112 | 49  | 1 | 4   | 336 | 9   | 120 | 4.00E-45 | 146  |
| TcMYB59 | ATMYB94  | 56.6  | 106 | 46  | 0 | 10  | 327 | 11  | 116 | 5.00E-45 | 147  |

|         |           |       |     |     |   |     |     |     |     |          |      |
|---------|-----------|-------|-----|-----|---|-----|-----|-----|-----|----------|------|
| TcMYB59 | ATMYB87   | 47.68 | 151 | 75  | 4 | 13  | 453 | 12  | 158 | 7.00E-45 | 145  |
| TcMYB59 | AtMYB103  | 45.89 | 146 | 74  | 1 | 13  | 435 | 12  | 157 | 7.00E-45 | 147  |
| TcMYB59 | AtMYB85   | 40.91 | 198 | 114 | 4 | 10  | 594 | 11  | 200 | 1.00E-44 | 144  |
| TcMYB59 | AtMYB42   | 56.41 | 117 | 51  | 0 | 13  | 363 | 12  | 128 | 1.00E-44 | 144  |
| TcMYB59 | ATMYB80   | 54.7  | 117 | 53  | 0 | 13  | 363 | 12  | 128 | 1.00E-44 | 145  |
| TcMYB59 | ATMYB96   | 56.6  | 106 | 46  | 0 | 10  | 327 | 11  | 116 | 1.00E-44 | 146  |
| TcMYB59 | ATMYB61   | 51.13 | 133 | 60  | 1 | 13  | 396 | 12  | 144 | 2.00E-44 | 146  |
| TcMYB59 | ATMYB35   | 43.64 | 165 | 78  | 1 | 4   | 453 | 9   | 173 | 2.00E-44 | 144  |
| TcMYB59 | ATMYB11   | 56.6  | 106 | 46  | 0 | 10  | 327 | 11  | 116 | 3.00E-44 | 145  |
| TcMYB59 | ATMYB68   | 54.46 | 112 | 50  | 1 | 4   | 336 | 9   | 120 | 6.00E-44 | 145  |
| TcMYB59 | AtMYB83   | 48.99 | 149 | 76  | 2 | 13  | 459 | 30  | 172 | 6.00E-44 | 144  |
| TcMYB59 | ATMYB37   | 56.25 | 112 | 48  | 1 | 13  | 345 | 12  | 123 | 9.00E-44 | 143  |
| TcMYB59 | ATMYB31   | 56.19 | 105 | 46  | 0 | 13  | 327 | 12  | 116 | 1.00E-43 | 143  |
| TcMYB59 | AtMYB20   | 44.52 | 155 | 83  | 1 | 10  | 465 | 11  | 165 | 2.00E-43 | 141  |
| TcMYB59 | AtMYB43   | 40.35 | 228 | 129 | 6 | 10  | 672 | 11  | 222 | 2.00E-43 | 142  |
| TcMYB59 | AtMYB36   | 53.57 | 112 | 51  | 1 | 4   | 336 | 9   | 120 | 3.00E-43 | 142  |
| TcMYB59 | ATMYB29   | 45.75 | 153 | 83  | 2 | 10  | 468 | 11  | 158 | 3.00E-43 | 142  |
| TcMYB59 | AtMYB10   | 47.06 | 136 | 72  | 1 | 13  | 420 | 14  | 147 | 3.00E-43 | 139  |
| TcMYB59 | ATMYB28   | 45.58 | 147 | 72  | 1 | 10  | 426 | 11  | 157 | 4.00E-43 | 142  |
| TcMYB59 | ATMYB38   | 44.1  | 161 | 84  | 4 | 4   | 468 | 9   | 165 | 5.00E-43 | 140  |
| TcMYB59 | ATMYB121  | 44.1  | 161 | 77  | 2 | 10  | 453 | 26  | 185 | 5.00E-43 | 140  |
| TcMYB59 | AtMYB76   | 50    | 126 | 63  | 0 | 10  | 387 | 11  | 136 | 1.00E-42 | 140  |
| TcMYB59 | ATMYB71   | 56.48 | 108 | 47  | 0 | 10  | 333 | 17  | 124 | 2.00E-42 | 138  |
| TcMYB59 | ATMYB67   | 49.22 | 128 | 65  | 0 | 13  | 396 | 22  | 149 | 2.00E-42 | 139  |
| TcMYB59 | AtMYB47   | 49.59 | 121 | 61  | 0 | 10  | 372 | 11  | 131 | 7.00E-42 | 137  |
| TcMYB59 | ATMYB59-3 | 34.29 | 210 | 134 | 3 | 19  | 636 | 10  | 212 | 1.00E-41 | 135  |
| TcMYB59 | AtMYB112  | 55.34 | 103 | 46  | 0 | 13  | 321 | 32  | 134 | 1.00E-41 | 135  |
| TcMYB59 | AtMYB79   | 36.41 | 206 | 116 | 4 | 19  | 591 | 8   | 213 | 2.00E-41 | 135  |
| TcMYB59 | ATMYB57   | 43.36 | 143 | 81  | 1 | 7   | 435 | 23  | 163 | 3.00E-41 | 133  |
| TcMYB59 | ATMYB48   | 46.62 | 133 | 71  | 1 | 10  | 408 | 6   | 135 | 4.00E-41 | 134  |
| TcMYB59 | ATMYB55   | 54.47 | 123 | 44  | 1 | 13  | 345 | 12  | 134 | 6.00E-41 | 136  |
| TcMYB59 | AtMYB19   | 39.49 | 195 | 113 | 5 | 19  | 588 | 14  | 196 | 8.00E-41 | 134  |
| TcMYB59 | ATMYB26   | 54.62 | 119 | 45  | 1 | 13  | 342 | 12  | 130 | 2.00E-40 | 135  |
| TcMYB59 | AtMYB45   | 32.62 | 233 | 154 | 3 | 19  | 708 | 20  | 233 | 2.00E-40 | 132  |
| TcMYB59 | ATMYB120  | 55.24 | 105 | 47  | 0 | 13  | 327 | 26  | 130 | 3.00E-40 | 137  |
| TcMYB59 | AtMYB97   | 34.19 | 234 | 135 | 4 | 13  | 657 | 19  | 252 | 4.00E-40 | 135  |
| TcMYB59 | AtMYB18   | 37.92 | 240 | 139 | 8 | 19  | 708 | 12  | 219 | 4.00E-40 | 132  |
| TcMYB59 | AtMYB27   | 53.64 | 110 | 51  | 0 | 13  | 342 | 9   | 118 | 5.00E-40 | 131  |
| TcMYB59 | ATMYB101  | 40.13 | 152 | 91  | 1 | 10  | 465 | 17  | 165 | 6.00E-40 | 136  |
| TcMYB59 | AtMYB108  | 51.79 | 112 | 54  | 0 | 13  | 348 | 19  | 130 | 1.00E-39 | 132  |
| TcMYB59 | ATMYB3    | 50.46 | 109 | 54  | 0 | 13  | 339 | 20  | 128 | 2.00E-39 | 129  |
| TcMYB59 | AtMYB116  | 53.92 | 102 | 47  | 0 | 19  | 324 | 20  | 121 | 2.00E-39 | 130  |
| TcMYB59 | AtMYB81   | 39.1  | 156 | 95  | 1 | 1   | 468 | 16  | 170 | 3.00E-39 | 134  |
| TcMYB59 | AtMYB62   | 50    | 118 | 59  | 1 | 13  | 366 | 19  | 134 | 3.00E-39 | 130  |
| TcMYB59 | ATMYB99   | 53.1  | 113 | 46  | 1 | 10  | 327 | 12  | 124 | 4.00E-39 | 129  |
| TcMYB59 | AtMYB40   | 54.72 | 106 | 48  | 0 | 10  | 327 | 11  | 116 | 6.00E-39 | 129  |
| TcMYB59 | ATMYB2    | 46.09 | 115 | 62  | 0 | 13  | 357 | 20  | 134 | 1.00E-38 | 129  |
| TcMYB59 | AtMYB24   | 51.43 | 105 | 51  | 0 | 13  | 327 | 17  | 121 | 2.00E-38 | 126  |
| TcMYB59 | ATMYB33   | 39.75 | 161 | 86  | 3 | 13  | 462 | 32  | 189 | 2.00E-37 | 130  |
| TcMYB59 | ATMYB65   | 47.66 | 107 | 56  | 0 | 4   | 324 | 38  | 144 | 4.00E-36 | 127  |
| TcMYB59 | ATMYB78   | 29.76 | 289 | 141 | 6 | 13  | 693 | 26  | 314 | 1.00E-33 | 117  |
| TcMYB59 | AtMYB104  | 33.97 | 156 | 103 | 1 | 1   | 468 | 12  | 166 | 3.00E-32 | 114  |
| TcMYB59 | ATMYB54   | 39.19 | 148 | 88  | 3 | 16  | 453 | 5   | 145 | 3.00E-30 | 105  |
| TcMYB59 | AtMYB115  | 33.97 | 156 | 103 | 2 | 13  | 480 | 156 | 307 | 5.00E-28 | 102  |
| TcMYB59 | AtMYB117  | 43.27 | 104 | 59  | 1 | 13  | 324 | 96  | 198 | 4.00E-27 | 100  |
| TcMYB59 | ATMYB118  | 42.06 | 107 | 62  | 1 | 4   | 324 | 184 | 289 | 4.00E-27 | 100  |
| TcMYB59 | ATMYB118  | 28.17 | 71  | 46  | 2 | 130 | 327 | 169 | 239 | 1.00E-04 | 35   |
| TcMYB59 | ATMYB73   | 45.1  | 102 | 56  | 1 | 19  | 324 | 13  | 113 | 8.00E-27 | 98.6 |
| TcMYB59 | ATMYB105  | 41.12 | 107 | 63  | 1 | 4   | 324 | 102 | 207 | 9.00E-27 | 98.6 |
| TcMYB59 | ATMYB44   | 43.52 | 108 | 61  | 1 | 19  | 342 | 6   | 112 | 1.00E-26 | 97.8 |
| TcMYB59 | ATMYB25   | 44.34 | 106 | 59  | 1 | 19  | 336 | 50  | 154 | 1.00E-26 | 98.6 |
| TcMYB59 | AtMYB70   | 44.12 | 102 | 57  | 1 | 19  | 324 | 13  | 113 | 3.00E-26 | 97.1 |
| TcMYB59 | AtMYB98   | 37.23 | 137 | 86  | 2 | 13  | 423 | 215 | 349 | 4.00E-26 | 98.2 |
| TcMYB59 | ATMYB52   | 42.72 | 103 | 59  | 1 | 16  | 324 | 4   | 105 | 5.00E-26 | 95.1 |
| TcMYB59 | ATMYB119  | 35.43 | 127 | 82  | 1 | 13  | 393 | 103 | 228 | 2.00E-25 | 95.9 |
| TcMYB59 | AtMYB1    | 40.17 | 117 | 70  | 1 | 19  | 369 | 55  | 170 | 3.00E-25 | 95.5 |
| TcMYB59 | AtMYB56   | 37.31 | 134 | 82  | 2 | 16  | 411 | 92  | 224 | 1.00E-24 | 92.8 |
| TcMYB59 | AtMYB109  | 44.23 | 104 | 58  | 1 | 19  | 330 | 56  | 158 | 1.00E-24 | 93.6 |
| TcMYB59 | AtMYB100  | 37.74 | 106 | 66  | 1 | 4   | 321 | 21  | 125 | 1.00E-24 | 90.9 |
| TcMYB59 | AtMYB64   | 33.11 | 148 | 99  | 2 | 19  | 462 | 105 | 249 | 2.00E-24 | 93.2 |
| TcMYB59 | ATMYB69   | 34.31 | 137 | 90  | 1 | 19  | 429 | 19  | 154 | 7.00E-23 | 86.7 |
| TcMYB59 | ATMYB77   | 41.18 | 102 | 60  | 1 | 19  | 324 | 6   | 106 | 8.00E-23 | 87.4 |
| TcMYB59 | ATMYB91   | 40.38 | 104 | 60  | 1 | 19  | 324 | 4   | 107 | 1.00E-22 | 87.8 |
| TcMYB59 | ATMYB110  | 36.54 | 104 | 66  | 1 | 16  | 327 | 66  | 168 | 2.00E-21 | 83.6 |
| TcMYB59 | ATMYB88   | 38.38 | 99  | 61  | 1 | 28  | 324 | 33  | 130 | 3.00E-19 | 78.6 |
| TcMYB59 | AtMYB22   | 34.91 | 106 | 69  | 2 | 4   | 321 | 49  | 152 | 4.00E-19 | 76.6 |
| TcMYB59 | AtMYB89   | 40.74 | 108 | 60  | 2 | 22  | 333 | 57  | 163 | 6.00E-19 | 74.7 |
| TcMYB59 | AtMYB124  | 32.33 | 133 | 77  | 3 | 28  | 387 | 28  | 159 | 1.00E-18 | 77   |
| TcMYB60 | ATMYB61   | 72    | 175 | 39  | 3 | 1   | 495 | 1   | 175 | 1.00E-86 | 263  |
| TcMYB60 | ATMYB55   | 68.65 | 185 | 33  | 2 | 1   | 480 | 1   | 185 | 2.00E-84 | 256  |

|         |          |       |     |     |    |    |      |    |     |          |     |
|---------|----------|-------|-----|-----|----|----|------|----|-----|----------|-----|
| TcMYB60 | AtMYB50  | 76.82 | 151 | 35  | 1  | 1  | 453  | 1  | 149 | 3.00E-84 | 255 |
| TcMYB60 | ATMYB86  | 85.27 | 129 | 19  | 0  | 1  | 387  | 1  | 129 | 5.00E-81 | 248 |
| TcMYB60 | ATMYB67  | 55.93 | 177 | 78  | 2  | 10 | 540  | 14 | 177 | 5.00E-67 | 210 |
| TcMYB60 | AtMYB32  | 62.24 | 143 | 54  | 1  | 1  | 429  | 1  | 141 | 7.00E-64 | 201 |
| TcMYB60 | ATMYB26  | 73.6  | 125 | 24  | 1  | 1  | 348  | 1  | 125 | 2.00E-63 | 203 |
| TcMYB60 | AtMYB103 | 34.69 | 392 | 232 | 11 | 1  | 1104 | 1  | 361 | 2.00E-63 | 203 |
| TcMYB60 | AtMYB107 | 69.53 | 128 | 39  | 0  | 1  | 384  | 1  | 128 | 3.00E-63 | 201 |
| TcMYB60 | AtMYB17  | 68.99 | 129 | 40  | 0  | 1  | 387  | 1  | 129 | 6.00E-62 | 197 |
| TcMYB60 | AtMYB9   | 67.97 | 128 | 41  | 0  | 1  | 384  | 1  | 128 | 2.00E-61 | 197 |
| TcMYB60 | MYB7     | 60.56 | 142 | 56  | 0  | 1  | 426  | 1  | 142 | 5.00E-61 | 193 |
| TcMYB60 | ATMYB4   | 55.9  | 161 | 62  | 1  | 1  | 456  | 1  | 161 | 1.00E-60 | 193 |
| TcMYB60 | ATMYB16  | 67.18 | 131 | 43  | 0  | 1  | 393  | 1  | 131 | 1.00E-60 | 194 |
| TcMYB60 | ATMYB3   | 64.12 | 131 | 47  | 0  | 1  | 393  | 1  | 131 | 1.00E-59 | 189 |
| TcMYB60 | AtMYB43  | 67.18 | 131 | 43  | 0  | 1  | 393  | 1  | 131 | 1.00E-59 | 191 |
| TcMYB60 | AtMYB93  | 41.63 | 257 | 146 | 4  | 1  | 759  | 1  | 228 | 2.00E-59 | 192 |
| TcMYB60 | AtMYB83  | 51.74 | 172 | 83  | 0  | 25 | 540  | 27 | 198 | 2.00E-59 | 191 |
| TcMYB60 | AtMYB6   | 63.36 | 131 | 48  | 0  | 1  | 393  | 1  | 131 | 3.00E-59 | 187 |
| TcMYB60 | AtMYB20  | 63.04 | 138 | 51  | 0  | 1  | 414  | 1  | 138 | 3.00E-59 | 189 |
| TcMYB60 | AtMYB85  | 43.4  | 235 | 126 | 4  | 1  | 684  | 1  | 220 | 5.00E-59 | 188 |
| TcMYB60 | ATMYB34  | 52.69 | 167 | 77  | 2  | 1  | 495  | 1  | 166 | 9.00E-59 | 188 |
| TcMYB60 | ATMYB35  | 55.28 | 161 | 68  | 1  | 1  | 471  | 1  | 161 | 2.00E-58 | 188 |
| TcMYB60 | ATMYB106 | 69.67 | 122 | 37  | 0  | 16 | 381  | 49 | 170 | 2.00E-58 | 190 |
| TcMYB60 | ATMYB92  | 35.13 | 316 | 180 | 5  | 1  | 873  | 1  | 316 | 3.00E-58 | 188 |
| TcMYB60 | AtMYB42  | 50.27 | 187 | 93  | 2  | 1  | 561  | 1  | 171 | 4.00E-58 | 186 |
| TcMYB60 | ATMYB102 | 63.64 | 132 | 48  | 0  | 1  | 396  | 1  | 132 | 4.00E-58 | 188 |
| TcMYB60 | MYB8     | 61.83 | 131 | 50  | 0  | 1  | 393  | 1  | 131 | 6.00E-58 | 183 |
| TcMYB60 | ATMYB80  | 48.35 | 182 | 94  | 1  | 1  | 546  | 1  | 179 | 7.00E-58 | 187 |
| TcMYB60 | AtMYB51  | 37.5  | 312 | 189 | 9  | 1  | 918  | 1  | 276 | 1.00E-57 | 187 |
| TcMYB60 | AtMYB74  | 62.41 | 133 | 49  | 1  | 1  | 396  | 1  | 133 | 2.00E-57 | 186 |
| TcMYB60 | ATMYB95  | 56.58 | 152 | 65  | 1  | 1  | 453  | 1  | 152 | 2.00E-56 | 181 |
| TcMYB60 | ATMYB46  | 72.48 | 109 | 30  | 0  | 28 | 354  | 16 | 124 | 3.00E-56 | 181 |
| TcMYB60 | AtMYB53  | 63.28 | 128 | 47  | 0  | 1  | 384  | 1  | 128 | 3.00E-56 | 182 |
| TcMYB60 | AtMYB40  | 59.72 | 144 | 58  | 1  | 1  | 432  | 1  | 143 | 3.00E-56 | 181 |
| TcMYB60 | ATMYB28  | 32.25 | 369 | 226 | 10 | 1  | 1035 | 1  | 358 | 9.00E-56 | 182 |
| TcMYB60 | AtMYB41  | 60.61 | 132 | 52  | 0  | 1  | 396  | 1  | 132 | 1.00E-55 | 180 |
| TcMYB60 | AtMYB49  | 64.84 | 128 | 45  | 0  | 1  | 384  | 1  | 128 | 1.00E-55 | 181 |
| TcMYB60 | ATMYB29  | 44.44 | 207 | 115 | 2  | 1  | 621  | 1  | 196 | 2.00E-55 | 181 |
| TcMYB60 | ATMYB122 | 48.85 | 174 | 73  | 1  | 1  | 474  | 1  | 174 | 3.00E-54 | 177 |
| TcMYB60 | ATMYB5   | 53.42 | 161 | 75  | 1  | 16 | 498  | 17 | 173 | 3.00E-54 | 175 |
| TcMYB60 | ATMYB13  | 48.3  | 176 | 87  | 1  | 1  | 516  | 1  | 176 | 6.00E-54 | 174 |
| TcMYB60 | AtMYB47  | 39.56 | 225 | 129 | 3  | 1  | 654  | 1  | 222 | 2.00E-53 | 174 |
| TcMYB60 | ATMYB14  | 55.03 | 149 | 67  | 0  | 1  | 447  | 1  | 149 | 4.00E-53 | 172 |
| TcMYB60 | AtMYB45  | 54.36 | 149 | 68  | 0  | 25 | 471  | 15 | 163 | 4.00E-53 | 172 |
| TcMYB60 | ATMYB63  | 47.09 | 189 | 99  | 3  | 4  | 567  | 4  | 180 | 9.00E-53 | 172 |
| TcMYB60 | AtMYB76  | 45.79 | 190 | 96  | 1  | 1  | 549  | 1  | 190 | 4.00E-52 | 172 |
| TcMYB60 | ATMYB15  | 37.2  | 250 | 116 | 5  | 1  | 627  | 1  | 248 | 5.00E-52 | 170 |
| TcMYB60 | ATMYB99  | 60.9  | 133 | 45  | 1  | 4  | 381  | 3  | 135 | 2.00E-51 | 167 |
| TcMYB60 | ATMYB72  | 40.83 | 240 | 120 | 4  | 4  | 657  | 4  | 241 | 2.00E-51 | 169 |
| TcMYB60 | ATMYB58  | 42.93 | 205 | 117 | 2  | 4  | 618  | 4  | 204 | 2.00E-50 | 166 |
| TcMYB60 | ATMYB111 | 63.79 | 116 | 42  | 0  | 1  | 348  | 1  | 116 | 9.00E-49 | 163 |
| TcMYB60 | AtMYB19  | 42.22 | 225 | 99  | 4  | 25 | 606  | 9  | 233 | 1.00E-48 | 160 |
| TcMYB60 | AtMYB10  | 60.5  | 119 | 47  | 0  | 7  | 363  | 5  | 123 | 3.00E-48 | 159 |
| TcMYB60 | ATMYB12  | 62.07 | 116 | 44  | 0  | 1  | 348  | 1  | 116 | 5.00E-48 | 162 |
| TcMYB60 | AtMYB60  | 59.02 | 122 | 50  | 0  | 1  | 366  | 1  | 122 | 8.00E-48 | 159 |
| TcMYB60 | ATMYB11  | 61.21 | 116 | 45  | 0  | 1  | 348  | 1  | 116 | 1.00E-47 | 160 |
| TcMYB60 | AtMYB36  | 47.65 | 170 | 80  | 2  | 1  | 483  | 1  | 170 | 2.00E-47 | 160 |
| TcMYB60 | AtMYB18  | 67.59 | 108 | 35  | 0  | 22 | 345  | 6  | 113 | 3.00E-47 | 157 |
| TcMYB60 | ATMYB94  | 59.32 | 118 | 48  | 0  | 1  | 354  | 1  | 118 | 2.00E-46 | 157 |
| TcMYB60 | ATMYB96  | 59.32 | 118 | 48  | 0  | 1  | 354  | 1  | 118 | 5.00E-46 | 156 |
| TcMYB60 | ATMYB37  | 56.91 | 123 | 52  | 1  | 1  | 366  | 1  | 123 | 2.00E-45 | 154 |
| TcMYB60 | ATMYB30  | 48.41 | 157 | 81  | 2  | 1  | 471  | 1  | 143 | 2.00E-45 | 154 |
| TcMYB60 | ATMYB31  | 49.04 | 157 | 80  | 2  | 1  | 471  | 1  | 142 | 3.00E-45 | 154 |
| TcMYB60 | ATMYB84  | 58.97 | 117 | 47  | 1  | 1  | 348  | 1  | 117 | 1.00E-44 | 151 |
| TcMYB60 | ATMYB123 | 62.96 | 108 | 40  | 0  | 25 | 348  | 11 | 118 | 2.00E-44 | 149 |
| TcMYB60 | AtMYB79  | 63.81 | 105 | 38  | 0  | 37 | 351  | 7  | 111 | 2.00E-44 | 149 |
| TcMYB60 | AtMYB82  | 48.65 | 148 | 62  | 2  | 25 | 426  | 9  | 156 | 3.00E-44 | 147 |
| TcMYB60 | ATMYB121 | 42.78 | 180 | 103 | 1  | 25 | 564  | 24 | 198 | 8.00E-44 | 148 |
| TcMYB60 | ATMYB38  | 55.12 | 127 | 56  | 1  | 1  | 378  | 1  | 127 | 1.00E-43 | 149 |
| TcMYB60 | ATMYB3   | 47.89 | 142 | 74  | 1  | 31 | 456  | 19 | 155 | 1.00E-43 | 146 |
| TcMYB60 | ATMYB68  | 58.12 | 117 | 48  | 1  | 1  | 348  | 1  | 117 | 1.00E-43 | 150 |
| TcMYB60 | ATMYB66  | 59.62 | 104 | 42  | 0  | 37 | 348  | 17 | 120 | 1.00E-43 | 145 |
| TcMYB60 | ATMYB71  | 62.86 | 105 | 39  | 0  | 37 | 351  | 19 | 123 | 2.00E-43 | 147 |
| TcMYB60 | ATMYB87  | 57.26 | 117 | 49  | 1  | 1  | 348  | 1  | 117 | 4.00E-43 | 147 |
| TcMYB60 | ATMYB75  | 42.93 | 184 | 90  | 4  | 34 | 540  | 8  | 183 | 5.00E-43 | 145 |
| TcMYB60 | ATMYB23  | 56.48 | 108 | 47  | 0  | 25 | 348  | 9  | 116 | 6.00E-43 | 144 |
| TcMYB60 | AtMYB116 | 55.65 | 115 | 51  | 0  | 37 | 381  | 19 | 133 | 4.00E-42 | 144 |
| TcMYB60 | AtMYB97  | 59.81 | 107 | 43  | 0  | 34 | 354  | 19 | 125 | 4.00E-42 | 147 |
| TcMYB60 | ATMYB0   | 56.07 | 107 | 47  | 0  | 28 | 348  | 12 | 118 | 4.00E-42 | 142 |
| TcMYB60 | AtMYB24  | 57.27 | 110 | 47  | 0  | 31 | 360  | 16 | 125 | 6.00E-42 | 141 |
| TcMYB60 | ATMYB57  | 54.31 | 116 | 53  | 0  | 34 | 381  | 25 | 140 | 9.00E-42 | 140 |

|         |           |       |     |     |   |    |      |     |     |          |      |
|---------|-----------|-------|-----|-----|---|----|------|-----|-----|----------|------|
| TcMYB60 | ATMYB101  | 60.38 | 106 | 42  | 0 | 34 | 351  | 18  | 123 | 1.00E-41 | 147  |
| TcMYB60 | AtMYB114  | 59.62 | 104 | 42  | 0 | 34 | 345  | 8   | 111 | 1.00E-41 | 138  |
| TcMYB60 | AtMYB81   | 49.24 | 132 | 56  | 1 | 25 | 387  | 17  | 148 | 1.00E-41 | 146  |
| TcMYB60 | AtMYB62   | 55.08 | 118 | 53  | 0 | 28 | 381  | 17  | 134 | 4.00E-41 | 141  |
| TcMYB60 | ATMYB120  | 61.68 | 107 | 41  | 0 | 34 | 354  | 26  | 132 | 5.00E-41 | 146  |
| TcMYB60 | ATMYB33   | 58.49 | 106 | 44  | 0 | 34 | 351  | 32  | 137 | 8.00E-40 | 143  |
| TcMYB60 | ATMYB90   | 50.77 | 130 | 55  | 1 | 34 | 396  | 8   | 137 | 2.00E-39 | 136  |
| TcMYB60 | ATMYB59-3 | 54.05 | 111 | 51  | 0 | 25 | 357  | 5   | 115 | 3.00E-39 | 135  |
| TcMYB60 | ATMYB65   | 39.23 | 209 | 126 | 4 | 34 | 657  | 41  | 241 | 3.00E-39 | 142  |
| TcMYB60 | AtMYB108  | 55.86 | 111 | 49  | 0 | 34 | 366  | 19  | 129 | 3.00E-39 | 137  |
| TcMYB60 | AtMYB112  | 54.81 | 104 | 47  | 0 | 31 | 342  | 31  | 134 | 9.00E-39 | 134  |
| TcMYB60 | AtMYB113  | 56.48 | 108 | 47  | 0 | 34 | 357  | 8   | 115 | 1.00E-38 | 134  |
| TcMYB60 | ATMYB48   | 41.83 | 153 | 89  | 1 | 37 | 495  | 8   | 154 | 1.00E-38 | 134  |
| TcMYB60 | AtMYB27   | 48.09 | 131 | 68  | 1 | 25 | 417  | 6   | 131 | 4.00E-37 | 129  |
| TcMYB60 | ATMYB2    | 50.45 | 111 | 55  | 0 | 34 | 366  | 20  | 130 | 7.00E-37 | 129  |
| TcMYB60 | AtMYB104  | 49.11 | 112 | 57  | 1 | 25 | 360  | 13  | 121 | 1.00E-34 | 126  |
| TcMYB60 | ATMYB78   | 37.56 | 197 | 96  | 5 | 34 | 543  | 26  | 211 | 3.00E-34 | 124  |
| TcMYB60 | ATMYB119  | 30.51 | 236 | 157 | 6 | 28 | 714  | 101 | 318 | 6.00E-29 | 110  |
| TcMYB60 | ATMYB44   | 40.27 | 149 | 84  | 4 | 40 | 471  | 6   | 153 | 1.00E-28 | 107  |
| TcMYB60 | ATMYB77   | 50    | 102 | 51  | 1 | 40 | 345  | 6   | 106 | 2.00E-28 | 107  |
| TcMYB60 | ATMYB73   | 41.43 | 140 | 82  | 2 | 40 | 459  | 13  | 150 | 3.00E-28 | 107  |
| TcMYB60 | AtMYB70   | 50.98 | 102 | 50  | 1 | 40 | 345  | 13  | 113 | 1.00E-27 | 105  |
| TcMYB60 | AtMYB98   | 44.14 | 111 | 62  | 1 | 25 | 357  | 212 | 321 | 2.00E-27 | 106  |
| TcMYB60 | ATMYB118  | 43.33 | 120 | 65  | 3 | 25 | 375  | 184 | 301 | 5.00E-27 | 105  |
| TcMYB60 | ATMYB25   | 51.46 | 103 | 49  | 2 | 40 | 345  | 50  | 150 | 7.00E-27 | 103  |
| TcMYB60 | AtMYB1    | 50    | 102 | 51  | 1 | 40 | 345  | 55  | 155 | 2.00E-26 | 103  |
| TcMYB60 | AtMYB64   | 33.77 | 154 | 100 | 3 | 40 | 495  | 105 | 250 | 3.00E-26 | 102  |
| TcMYB60 | ATMYB105  | 42.86 | 112 | 63  | 2 | 25 | 357  | 102 | 211 | 7.00E-26 | 100  |
| TcMYB60 | AtMYB115  | 42.16 | 102 | 59  | 1 | 25 | 330  | 153 | 253 | 8.00E-26 | 100  |
| TcMYB60 | ATMYB54   | 46.23 | 106 | 56  | 2 | 40 | 354  | 6   | 109 | 9.00E-26 | 98.2 |
| TcMYB60 | ATMYB52   | 43.4  | 106 | 60  | 1 | 40 | 357  | 5   | 109 | 1.00E-25 | 98.2 |
| TcMYB60 | AtMYB109  | 50.49 | 103 | 50  | 2 | 40 | 345  | 56  | 156 | 1.00E-25 | 100  |
| TcMYB60 | AtMYB117  | 44.44 | 108 | 59  | 2 | 34 | 354  | 96  | 201 | 5.00E-25 | 98.6 |
| TcMYB60 | ATMYB110  | 33.99 | 153 | 101 | 3 | 40 | 498  | 67  | 208 | 2.00E-24 | 95.9 |
| TcMYB60 | ATMYB88   | 30.43 | 253 | 143 | 8 | 10 | 669  | 19  | 256 | 4.00E-24 | 97.4 |
| TcMYB60 | AtMYB100  | 35.03 | 157 | 100 | 3 | 25 | 489  | 21  | 174 | 5.00E-24 | 93.2 |
| TcMYB60 | ATMYB69   | 38.18 | 110 | 68  | 1 | 25 | 354  | 14  | 122 | 2.00E-23 | 91.7 |
| TcMYB60 | AtMYB56   | 39.05 | 105 | 64  | 1 | 40 | 354  | 93  | 196 | 2.00E-22 | 90.5 |
| TcMYB60 | AtMYB89   | 34.48 | 116 | 76  | 1 | 25 | 372  | 51  | 165 | 4.00E-20 | 80.9 |
| TcMYB60 | AtMYB124  | 37.14 | 105 | 66  | 1 | 49 | 363  | 28  | 131 | 1.00E-19 | 83.6 |
| TcMYB60 | ATMYB91   | 38.46 | 104 | 62  | 1 | 49 | 354  | 7   | 110 | 2.00E-19 | 82   |
| TcMYB60 | AtMYB22   | 34.82 | 112 | 73  | 2 | 25 | 360  | 49  | 158 | 1.00E-18 | 78.2 |
| TcMYB61 | ATMYB5    | 75.2  | 125 | 31  | 0 | 13 | 387  | 16  | 140 | 9.00E-73 | 221  |
| TcMYB61 | MYB7      | 57.58 | 165 | 66  | 2 | 1  | 483  | 1   | 165 | 3.00E-68 | 210  |
| TcMYB61 | AtMYB32   | 60    | 150 | 60  | 0 | 1  | 450  | 1   | 150 | 9.00E-67 | 206  |
| TcMYB61 | AtMYB17   | 67.94 | 131 | 42  | 0 | 1  | 393  | 1   | 131 | 1.00E-66 | 207  |
| TcMYB61 | ATMYB4    | 63.04 | 138 | 51  | 0 | 1  | 414  | 1   | 138 | 3.00E-66 | 205  |
| TcMYB61 | ATMYB111  | 61.01 | 159 | 58  | 2 | 1  | 465  | 1   | 159 | 3.00E-66 | 207  |
| TcMYB61 | ATMYB3    | 60.69 | 145 | 57  | 1 | 1  | 435  | 1   | 142 | 1.00E-65 | 203  |
| TcMYB61 | AtMYB6    | 63.91 | 133 | 48  | 0 | 1  | 399  | 1   | 133 | 4.00E-65 | 201  |
| TcMYB61 | MYB8      | 64.29 | 126 | 45  | 0 | 1  | 378  | 1   | 126 | 3.00E-64 | 198  |
| TcMYB61 | AtMYB42   | 58.24 | 170 | 71  | 1 | 1  | 510  | 1   | 165 | 9.00E-64 | 199  |
| TcMYB61 | AtMYB43   | 43.43 | 251 | 140 | 3 | 1  | 747  | 1   | 243 | 1.00E-63 | 200  |
| TcMYB61 | AtMYB41   | 43.03 | 251 | 143 | 4 | 1  | 753  | 1   | 239 | 1.00E-63 | 199  |
| TcMYB61 | AtMYB107  | 67.19 | 128 | 42  | 0 | 1  | 384  | 1   | 128 | 2.00E-63 | 199  |
| TcMYB61 | AtMYB85   | 69.77 | 129 | 39  | 0 | 1  | 387  | 1   | 129 | 2.00E-63 | 197  |
| TcMYB61 | AtMYB20   | 57.83 | 166 | 67  | 2 | 1  | 489  | 1   | 166 | 4.00E-63 | 197  |
| TcMYB61 | ATMYB16   | 52.66 | 188 | 76  | 2 | 1  | 525  | 1   | 185 | 8.00E-63 | 198  |
| TcMYB61 | ATMYB12   | 74.14 | 116 | 30  | 0 | 1  | 348  | 1   | 116 | 1.00E-62 | 199  |
| TcMYB61 | AtMYB9    | 37.61 | 351 | 216 | 8 | 1  | 1044 | 1   | 333 | 1.00E-62 | 198  |
| TcMYB61 | ATMYB102  | 67.97 | 128 | 41  | 0 | 1  | 384  | 1   | 128 | 2.00E-62 | 198  |
| TcMYB61 | ATMYB106  | 41.88 | 277 | 145 | 6 | 10 | 792  | 47  | 315 | 6.00E-62 | 197  |
| TcMYB61 | ATMYB15   | 57.24 | 152 | 53  | 1 | 1  | 420  | 1   | 152 | 6.00E-61 | 192  |
| TcMYB61 | AtMYB74   | 41.57 | 255 | 147 | 5 | 1  | 759  | 1   | 225 | 2.00E-60 | 191  |
| TcMYB61 | ATMYB11   | 53.67 | 177 | 76  | 3 | 1  | 513  | 1   | 172 | 6.00E-60 | 191  |
| TcMYB61 | AtMYB93   | 65.62 | 128 | 44  | 0 | 1  | 384  | 1   | 128 | 7.00E-60 | 191  |
| TcMYB61 | ATMYB14   | 44.05 | 227 | 113 | 3 | 1  | 639  | 1   | 219 | 2.00E-59 | 186  |
| TcMYB61 | ATMYB13   | 61.87 | 139 | 53  | 1 | 1  | 417  | 1   | 131 | 9.00E-59 | 185  |
| TcMYB61 | ATMYB86   | 39.74 | 302 | 172 | 6 | 1  | 876  | 1   | 291 | 2.00E-58 | 187  |
| TcMYB61 | ATMYB29   | 43.97 | 232 | 128 | 3 | 1  | 690  | 1   | 220 | 2.00E-58 | 187  |
| TcMYB61 | AtMYB49   | 42.46 | 252 | 136 | 4 | 1  | 729  | 1   | 224 | 4.00E-58 | 186  |
| TcMYB61 | ATMYB92   | 63.28 | 128 | 47  | 0 | 1  | 384  | 1   | 128 | 5.00E-58 | 186  |
| TcMYB61 | AtMYB53   | 63.28 | 128 | 47  | 0 | 1  | 384  | 1   | 128 | 5.00E-58 | 185  |
| TcMYB61 | AtMYB40   | 40.7  | 258 | 147 | 6 | 1  | 756  | 1   | 235 | 2.00E-57 | 182  |
| TcMYB61 | AtMYB51   | 49.72 | 181 | 78  | 3 | 1  | 504  | 1   | 181 | 2.00E-57 | 184  |
| TcMYB61 | ATMYB72   | 37.87 | 301 | 177 | 8 | 4  | 876  | 4   | 289 | 2.00E-56 | 181  |
| TcMYB61 | ATMYB122  | 38.83 | 273 | 150 | 5 | 1  | 768  | 1   | 270 | 3.00E-56 | 181  |
| TcMYB61 | ATMYB28   | 54.84 | 155 | 65  | 1 | 1  | 450  | 1   | 155 | 5.00E-56 | 181  |
| TcMYB61 | ATMYB63   | 51.57 | 159 | 76  | 1 | 4  | 477  | 4   | 162 | 8.00E-56 | 179  |
| TcMYB61 | ATMYB58   | 66.09 | 115 | 39  | 0 | 4  | 348  | 4   | 118 | 1.00E-55 | 177  |

|         |           |       |     |     |    |     |      |     |     |          |      |
|---------|-----------|-------|-----|-----|----|-----|------|-----|-----|----------|------|
| TcMYB61 | ATMYB123  | 62.41 | 141 | 53  | 3  | 34  | 456  | 14  | 145 | 2.00E-55 | 176  |
| TcMYB61 | ATMYB99   | 50    | 184 | 72  | 4  | 4   | 495  | 3   | 186 | 6.00E-55 | 175  |
| TcMYB61 | AtMYB50   | 52.47 | 162 | 69  | 2  | 1   | 462  | 1   | 162 | 1.00E-54 | 176  |
| TcMYB61 | ATMYB80   | 59.38 | 128 | 52  | 0  | 1   | 384  | 1   | 128 | 2.00E-54 | 176  |
| TcMYB61 | ATMYB34   | 58.91 | 129 | 53  | 0  | 1   | 387  | 1   | 129 | 2.00E-54 | 175  |
| TcMYB61 | AtMYB76   | 39.15 | 258 | 143 | 5  | 1   | 732  | 1   | 248 | 8.00E-54 | 175  |
| TcMYB61 | ATMYB61   | 34.99 | 363 | 210 | 13 | 1   | 1011 | 1   | 338 | 1.00E-53 | 175  |
| TcMYB61 | ATMYB31   | 39.67 | 242 | 138 | 4  | 1   | 702  | 1   | 238 | 1.00E-53 | 174  |
| TcMYB61 | ATMYB35   | 57.36 | 129 | 55  | 0  | 1   | 387  | 1   | 129 | 2.00E-53 | 173  |
| TcMYB61 | AtMYB10   | 48.17 | 164 | 81  | 1  | 7   | 486  | 5   | 168 | 2.00E-53 | 171  |
| TcMYB61 | ATMYB67   | 37.61 | 226 | 141 | 3  | 16  | 693  | 16  | 228 | 4.00E-52 | 169  |
| TcMYB61 | ATMYB30   | 58.14 | 129 | 54  | 1  | 1   | 387  | 1   | 127 | 4.00E-52 | 170  |
| TcMYB61 | AtMYB60   | 61.21 | 116 | 45  | 0  | 1   | 348  | 1   | 116 | 5.00E-52 | 168  |
| TcMYB61 | ATMYB94   | 38.14 | 236 | 141 | 4  | 1   | 693  | 1   | 230 | 6.00E-52 | 170  |
| TcMYB61 | AtMYB114  | 67.59 | 108 | 35  | 0  | 22  | 345  | 4   | 111 | 2.00E-51 | 162  |
| TcMYB61 | ATMYB96   | 39.75 | 239 | 144 | 5  | 1   | 717  | 1   | 224 | 3.00E-51 | 168  |
| TcMYB61 | AtMYB36   | 37.56 | 221 | 133 | 2  | 1   | 648  | 1   | 221 | 6.00E-51 | 167  |
| TcMYB61 | ATMYB66   | 57.04 | 135 | 49  | 2  | 40  | 417  | 18  | 150 | 1.00E-50 | 162  |
| TcMYB61 | ATMYB95   | 57.81 | 128 | 54  | 0  | 1   | 384  | 1   | 128 | 1.00E-50 | 164  |
| TcMYB61 | ATMYB75   | 52.17 | 161 | 73  | 3  | 22  | 492  | 4   | 157 | 1.00E-50 | 164  |
| TcMYB61 | AtMYB113  | 48.65 | 185 | 93  | 5  | 1   | 549  | 1   | 176 | 2.00E-50 | 163  |
| TcMYB61 | ATMYB90   | 66.67 | 108 | 36  | 0  | 22  | 345  | 4   | 111 | 5.00E-50 | 162  |
| TcMYB61 | ATMYB84   | 59.17 | 120 | 48  | 1  | 1   | 357  | 1   | 120 | 2.00E-49 | 162  |
| TcMYB61 | ATMYB55   | 56.74 | 141 | 49  | 1  | 1   | 387  | 1   | 141 | 3.00E-49 | 163  |
| TcMYB61 | ATMYB23   | 64.08 | 103 | 37  | 0  | 40  | 348  | 14  | 116 | 5.00E-49 | 159  |
| TcMYB61 | AtMYB82   | 65.69 | 102 | 35  | 0  | 40  | 345  | 14  | 115 | 5.00E-49 | 158  |
| TcMYB61 | ATMYB87   | 35.08 | 248 | 156 | 4  | 1   | 729  | 1   | 238 | 9.00E-49 | 160  |
| TcMYB61 | ATMYB0    | 46.5  | 157 | 84  | 0  | 40  | 510  | 16  | 172 | 3.00E-48 | 157  |
| TcMYB61 | AtMYB47   | 54.26 | 129 | 59  | 0  | 1   | 387  | 1   | 129 | 4.00E-48 | 158  |
| TcMYB61 | ATMYB68   | 58.33 | 120 | 49  | 1  | 1   | 357  | 1   | 120 | 7.00E-48 | 160  |
| TcMYB61 | ATMYB38   | 55.12 | 127 | 56  | 1  | 1   | 378  | 1   | 127 | 6.00E-47 | 155  |
| TcMYB61 | AtMYB103  | 54.69 | 128 | 58  | 0  | 1   | 384  | 1   | 128 | 9.00E-47 | 157  |
| TcMYB61 | ATMYB37   | 58.47 | 118 | 48  | 1  | 1   | 351  | 1   | 118 | 2.00E-46 | 155  |
| TcMYB61 | ATMYB101  | 37.93 | 232 | 138 | 4  | 31  | 708  | 17  | 245 | 3.00E-46 | 158  |
| TcMYB61 | AtMYB83   | 54.69 | 128 | 58  | 0  | 22  | 405  | 26  | 153 | 5.00E-45 | 152  |
| TcMYB61 | ATMYB120  | 30.06 | 346 | 235 | 7  | 34  | 1050 | 26  | 333 | 1.00E-44 | 154  |
| TcMYB61 | ATMYB57   | 43.1  | 174 | 90  | 3  | 34  | 528  | 25  | 198 | 2.00E-44 | 146  |
| TcMYB61 | AtMYB24   | 49.25 | 134 | 68  | 0  | 34  | 435  | 17  | 150 | 3.00E-44 | 146  |
| TcMYB61 | AtMYB112  | 55.93 | 118 | 50  | 1  | 25  | 372  | 29  | 146 | 6.00E-44 | 146  |
| TcMYB61 | AtMYB79   | 61.76 | 102 | 39  | 0  | 40  | 345  | 8   | 109 | 1.00E-43 | 146  |
| TcMYB61 | ATMYB46   | 60.95 | 105 | 41  | 0  | 34  | 348  | 18  | 122 | 1.00E-43 | 146  |
| TcMYB61 | ATMYB71   | 60    | 105 | 42  | 0  | 31  | 345  | 17  | 121 | 2.00E-43 | 145  |
| TcMYB61 | AtMYB116  | 55.26 | 114 | 51  | 0  | 40  | 381  | 20  | 133 | 3.00E-43 | 145  |
| TcMYB61 | ATMYB26   | 53.97 | 126 | 49  | 1  | 1   | 351  | 1   | 126 | 6.00E-43 | 147  |
| TcMYB61 | ATMYB3    | 50.83 | 120 | 59  | 0  | 4   | 363  | 10  | 129 | 8.00E-43 | 142  |
| TcMYB61 | AtMYB108  | 60.38 | 106 | 42  | 0  | 25  | 342  | 16  | 121 | 1.00E-42 | 145  |
| TcMYB61 | ATMYB121  | 51.61 | 124 | 60  | 0  | 31  | 402  | 26  | 149 | 2.00E-42 | 143  |
| TcMYB61 | AtMYB62   | 61.54 | 104 | 40  | 0  | 34  | 345  | 19  | 122 | 3.00E-42 | 143  |
| TcMYB61 | ATMYB48   | 46.15 | 143 | 75  | 1  | 31  | 453  | 6   | 148 | 1.00E-41 | 140  |
| TcMYB61 | AtMYB81   | 41.05 | 190 | 97  | 5  | 25  | 549  | 17  | 200 | 1.00E-41 | 145  |
| TcMYB61 | AtMYB97   | 35.83 | 240 | 150 | 4  | 28  | 735  | 17  | 254 | 7.00E-41 | 142  |
| TcMYB61 | ATMYB2    | 53.85 | 104 | 48  | 0  | 34  | 345  | 20  | 123 | 1.00E-40 | 138  |
| TcMYB61 | ATMYB59-3 | 56.6  | 106 | 46  | 0  | 40  | 357  | 10  | 115 | 4.00E-40 | 135  |
| TcMYB61 | AtMYB27   | 58.65 | 104 | 43  | 0  | 34  | 345  | 9   | 112 | 4.00E-39 | 133  |
| TcMYB61 | ATMYB33   | 52.88 | 104 | 49  | 0  | 34  | 345  | 32  | 135 | 1.00E-38 | 138  |
| TcMYB61 | ATMYB65   | 41.67 | 156 | 91  | 2  | 34  | 501  | 41  | 193 | 1.00E-38 | 138  |
| TcMYB61 | AtMYB18   | 56.19 | 105 | 46  | 0  | 40  | 354  | 12  | 116 | 1.00E-36 | 128  |
| TcMYB61 | ATMYB78   | 50    | 120 | 46  | 1  | 25  | 342  | 23  | 142 | 1.00E-36 | 129  |
| TcMYB61 | AtMYB19   | 54.29 | 105 | 48  | 0  | 40  | 354  | 14  | 118 | 2.00E-36 | 127  |
| TcMYB61 | AtMYB45   | 33.64 | 217 | 121 | 4  | 22  | 603  | 14  | 230 | 7.00E-35 | 122  |
| TcMYB61 | AtMYB104  | 44.44 | 108 | 60  | 1  | 40  | 363  | 18  | 124 | 1.00E-28 | 108  |
| TcMYB61 | ATMYB119  | 33.16 | 190 | 121 | 5  | 22  | 573  | 99  | 279 | 3.00E-27 | 105  |
| TcMYB61 | ATMYB25   | 35.67 | 171 | 86  | 4  | 40  | 480  | 50  | 215 | 3.00E-27 | 103  |
| TcMYB61 | AtMYB64   | 37.5  | 152 | 87  | 4  | 40  | 471  | 105 | 250 | 5.00E-27 | 104  |
| TcMYB61 | ATMYB73   | 43.93 | 107 | 60  | 1  | 40  | 360  | 13  | 118 | 3.00E-26 | 100  |
| TcMYB61 | ATMYB118  | 34.78 | 161 | 103 | 4  | 25  | 501  | 184 | 331 | 5.00E-26 | 101  |
| TcMYB61 | AtMYB115  | 44.79 | 96  | 53  | 1  | 40  | 327  | 158 | 252 | 5.00E-26 | 100  |
| TcMYB61 | AtMYB115  | 22.54 | 173 | 132 | 6  | 193 | 705  | 156 | 308 | 3.00E-04 | 34.7 |
| TcMYB61 | AtMYB98   | 41.8  | 122 | 69  | 2  | 25  | 384  | 212 | 330 | 8.00E-26 | 100  |
| TcMYB61 | ATMYB54   | 39.53 | 129 | 78  | 3  | 40  | 426  | 6   | 131 | 2.00E-25 | 96.7 |
| TcMYB61 | ATMYB105  | 35.51 | 138 | 89  | 1  | 22  | 435  | 101 | 237 | 2.00E-25 | 98.2 |
| TcMYB61 | ATMYB52   | 45.1  | 102 | 56  | 1  | 40  | 345  | 5   | 105 | 3.00E-25 | 96.3 |
| TcMYB61 | AtMYB109  | 44.66 | 103 | 56  | 2  | 40  | 345  | 56  | 156 | 1.00E-24 | 97.1 |
| TcMYB61 | AtMYB109  | 38.89 | 54  | 32  | 1  | 199 | 357  | 56  | 109 | 1.00E-04 | 36.2 |
| TcMYB61 | AtMYB70   | 42.16 | 102 | 59  | 1  | 40  | 345  | 13  | 113 | 2.00E-24 | 95.1 |
| TcMYB61 | ATMYB77   | 43.14 | 102 | 58  | 1  | 40  | 345  | 6   | 106 | 2.00E-24 | 94.7 |
| TcMYB61 | AtMYB117  | 43.27 | 104 | 59  | 1  | 34  | 345  | 96  | 198 | 3.00E-24 | 95.5 |
| TcMYB61 | ATMYB44   | 43.14 | 102 | 58  | 1  | 40  | 345  | 6   | 106 | 4.00E-24 | 94.4 |
| TcMYB61 | AtMYB1    | 40.74 | 108 | 60  | 2  | 40  | 351  | 55  | 157 | 4.00E-24 | 95.5 |
| TcMYB61 | AtMYB1    | 30.43 | 69  | 47  | 1  | 184 | 387  | 50  | 118 | 6.00E-05 | 37   |

|         |          |       |     |     |    |     |     |     |     |          |      |
|---------|----------|-------|-----|-----|----|-----|-----|-----|-----|----------|------|
| TcMYB61 | AtMYB100 | 35.62 | 146 | 90  | 3  | 49  | 474 | 29  | 173 | 9.00E-24 | 91.7 |
| TcMYB61 | ATMYB110 | 29.58 | 213 | 137 | 5  | 40  | 639 | 67  | 277 | 6.00E-23 | 90.9 |
| TcMYB61 | AtMYB56  | 28.57 | 196 | 140 | 4  | 40  | 627 | 93  | 275 | 4.00E-22 | 89   |
| TcMYB61 | ATMYB91  | 25.24 | 313 | 212 | 10 | 40  | 912 | 4   | 301 | 6.00E-22 | 89   |
| TcMYB61 | ATMYB69  | 39.25 | 107 | 65  | 1  | 25  | 345 | 14  | 119 | 1.00E-21 | 85.9 |
| TcMYB61 | AtMYB89  | 39.81 | 108 | 64  | 3  | 37  | 357 | 54  | 159 | 2.00E-20 | 81.3 |
| TcMYB61 | AtMYB22  | 30    | 130 | 91  | 2  | 49  | 438 | 57  | 182 | 2.00E-17 | 74.3 |
| TcMYB61 | ATMYB88  | 37.86 | 103 | 64  | 1  | 37  | 345 | 29  | 130 | 4.00E-17 | 75.1 |
| TcMYB61 | AtMYB124 | 30.19 | 159 | 103 | 4  | 37  | 489 | 24  | 176 | 9.00E-17 | 73.9 |
| TcMYB62 | ATMYB54  | 48.7  | 230 | 109 | 4  | 79  | 741 | 4   | 223 | 2.00E-67 | 205  |
| TcMYB62 | ATMYB54  | 40    | 50  | 26  | 2  | 862 | 999 | 194 | 243 | 6.00E-05 | 36.2 |
| TcMYB62 | ATMYB52  | 80.53 | 113 | 22  | 0  | 79  | 417 | 3   | 115 | 3.00E-67 | 205  |
| TcMYB62 | ATMYB52  | 32.89 | 76  | 44  | 2  | 793 | 999 | 170 | 245 | 2.00E-04 | 34.7 |
| TcMYB62 | AtMYB117 | 64.67 | 150 | 53  | 2  | 82  | 531 | 97  | 230 | 1.00E-65 | 204  |
| TcMYB62 | ATMYB105 | 45.49 | 233 | 119 | 4  | 1   | 675 | 80  | 309 | 2.00E-64 | 200  |
| TcMYB62 | AtMYB56  | 76.15 | 109 | 26  | 0  | 79  | 405 | 91  | 199 | 7.00E-59 | 186  |
| TcMYB62 | ATMYB110 | 57.05 | 156 | 61  | 3  | 16  | 465 | 38  | 187 | 7.00E-58 | 182  |
| TcMYB62 | ATMYB69  | 72.22 | 108 | 30  | 0  | 76  | 399 | 16  | 123 | 6.00E-57 | 178  |
| TcMYB62 | AtMYB89  | 60.95 | 105 | 41  | 0  | 88  | 402 | 57  | 161 | 2.00E-43 | 141  |
| TcMYB62 | ATMYB44  | 48.03 | 127 | 61  | 1  | 85  | 450 | 6   | 132 | 1.00E-40 | 137  |
| TcMYB62 | AtMYB109 | 53.85 | 104 | 48  | 0  | 85  | 396 | 56  | 159 | 6.00E-40 | 138  |
| TcMYB62 | ATMYB77  | 54.46 | 101 | 46  | 0  | 85  | 387 | 6   | 106 | 2.00E-39 | 134  |
| TcMYB62 | ATMYB25  | 52.78 | 108 | 51  | 0  | 85  | 408 | 50  | 157 | 9.00E-39 | 134  |
| TcMYB62 | AtMYB1   | 53.27 | 107 | 50  | 0  | 85  | 405 | 55  | 161 | 1.00E-38 | 134  |
| TcMYB62 | ATMYB73  | 51.49 | 101 | 49  | 0  | 85  | 387 | 13  | 113 | 1.00E-37 | 130  |
| TcMYB62 | AtMYB70  | 51.49 | 101 | 49  | 0  | 85  | 387 | 13  | 113 | 8.00E-37 | 127  |
| TcMYB62 | AtMYB64  | 44.53 | 128 | 71  | 2  | 22  | 405 | 86  | 208 | 2.00E-31 | 115  |
| TcMYB62 | AtMYB115 | 46.3  | 108 | 58  | 0  | 82  | 405 | 157 | 264 | 3.00E-31 | 114  |
| TcMYB62 | ATMYB118 | 41.18 | 136 | 80  | 2  | 61  | 468 | 181 | 312 | 1.00E-30 | 113  |
| TcMYB62 | ATMYB119 | 46.9  | 113 | 60  | 1  | 85  | 423 | 105 | 214 | 5.00E-30 | 111  |
| TcMYB62 | AtMYB98  | 39.44 | 142 | 83  | 2  | 16  | 432 | 193 | 334 | 2.00E-29 | 109  |
| TcMYB62 | AtMYB51  | 46.08 | 102 | 54  | 1  | 85  | 387 | 15  | 116 | 2.00E-28 | 105  |
| TcMYB62 | ATMYB63  | 43.36 | 113 | 62  | 2  | 70  | 402 | 11  | 122 | 6.00E-28 | 103  |
| TcMYB62 | ATMYB23  | 44.12 | 102 | 56  | 1  | 85  | 387 | 14  | 115 | 7.00E-28 | 101  |
| TcMYB62 | ATMYB67  | 41.09 | 129 | 74  | 2  | 85  | 465 | 24  | 151 | 8.00E-28 | 103  |
| TcMYB62 | ATMYB92  | 40.91 | 132 | 66  | 3  | 85  | 444 | 14  | 144 | 9.00E-28 | 103  |
| TcMYB62 | ATMYB66  | 44.12 | 102 | 56  | 1  | 85  | 387 | 18  | 119 | 9.00E-28 | 100  |
| TcMYB62 | AtMYB27  | 41.53 | 118 | 67  | 3  | 70  | 417 | 6   | 120 | 1.00E-27 | 101  |
| TcMYB62 | AtMYB100 | 45.45 | 99  | 53  | 2  | 91  | 384 | 28  | 125 | 5.00E-27 | 99.8 |
| TcMYB62 | ATMYB15  | 43.4  | 106 | 59  | 1  | 85  | 399 | 14  | 119 | 5.00E-27 | 100  |
| TcMYB62 | AtMYB19  | 47.57 | 103 | 52  | 2  | 85  | 387 | 14  | 115 | 5.00E-27 | 100  |
| TcMYB62 | AtMYB103 | 46.96 | 115 | 59  | 2  | 85  | 423 | 14  | 127 | 7.00E-27 | 102  |
| TcMYB62 | AtMYB53  | 45.37 | 108 | 57  | 2  | 70  | 387 | 9   | 115 | 1.00E-26 | 100  |
| TcMYB62 | AtMYB104 | 34.75 | 141 | 91  | 1  | 37  | 456 | 2   | 142 | 1.00E-26 | 101  |
| TcMYB62 | AtMYB36  | 34.55 | 165 | 91  | 4  | 85  | 528 | 14  | 178 | 1.00E-26 | 100  |
| TcMYB62 | ATMYB122 | 46.88 | 96  | 50  | 1  | 85  | 369 | 14  | 109 | 2.00E-26 | 100  |
| TcMYB62 | ATMYB0   | 43.14 | 102 | 57  | 1  | 85  | 387 | 16  | 117 | 2.00E-26 | 98.2 |
| TcMYB62 | AtMYB41  | 45.1  | 102 | 55  | 1  | 85  | 387 | 14  | 115 | 2.00E-26 | 99.4 |
| TcMYB62 | AtMYB10  | 44.66 | 103 | 55  | 2  | 85  | 387 | 16  | 117 | 2.00E-26 | 98.2 |
| TcMYB62 | AtMYB82  | 42.86 | 112 | 63  | 1  | 55  | 387 | 4   | 115 | 2.00E-26 | 97.1 |
| TcMYB62 | ATMYB58  | 38.85 | 139 | 84  | 2  | 70  | 483 | 11  | 142 | 3.00E-26 | 98.6 |
| TcMYB62 | AtMYB93  | 44.12 | 102 | 56  | 1  | 85  | 387 | 14  | 115 | 4.00E-26 | 99.8 |
| TcMYB62 | ATMYB14  | 46.6  | 103 | 53  | 2  | 85  | 387 | 14  | 115 | 5.00E-26 | 97.4 |
| TcMYB62 | ATMYB14  | 32.08 | 53  | 36  | 1  | 85  | 243 | 67  | 118 | 8.00E-05 | 35.8 |
| TcMYB62 | ATMYB80  | 46.6  | 103 | 53  | 2  | 85  | 387 | 14  | 115 | 6.00E-26 | 98.6 |
| TcMYB62 | AtMYB18  | 47.42 | 97  | 49  | 2  | 85  | 369 | 12  | 107 | 6.00E-26 | 97.8 |
| TcMYB62 | ATMYB101 | 31.2  | 266 | 163 | 8  | 85  | 822 | 20  | 279 | 7.00E-26 | 100  |
| TcMYB62 | ATMYB34  | 38.58 | 127 | 77  | 2  | 19  | 396 | 6   | 118 | 8.00E-26 | 97.8 |
| TcMYB62 | AtMYB47  | 42.72 | 103 | 57  | 2  | 85  | 387 | 14  | 115 | 9.00E-26 | 97.1 |
| TcMYB62 | AtMYB47  | 26.58 | 79  | 53  | 2  | 25  | 246 | 42  | 119 | 2.00E-04 | 34.7 |
| TcMYB62 | ATMYB84  | 35.47 | 172 | 99  | 6  | 85  | 564 | 14  | 182 | 1.00E-25 | 97.8 |
| TcMYB62 | ATMYB33  | 40.83 | 120 | 70  | 1  | 85  | 441 | 34  | 153 | 1.00E-25 | 100  |
| TcMYB62 | ATMYB35  | 45.1  | 102 | 55  | 1  | 85  | 387 | 14  | 115 | 1.00E-25 | 97.8 |
| TcMYB62 | AtMYB74  | 33.75 | 160 | 94  | 3  | 85  | 528 | 15  | 173 | 1.00E-25 | 97.8 |
| TcMYB62 | AtMYB49  | 43.14 | 102 | 57  | 1  | 85  | 387 | 14  | 115 | 2.00E-25 | 97.1 |
| TcMYB62 | AtMYB45  | 46.39 | 97  | 50  | 2  | 85  | 369 | 20  | 115 | 3.00E-25 | 95.5 |
| TcMYB62 | ATMYB16  | 44.12 | 102 | 56  | 1  | 85  | 387 | 14  | 115 | 3.00E-25 | 96.7 |
| TcMYB62 | ATMYB106 | 45.63 | 103 | 54  | 2  | 85  | 387 | 57  | 158 | 4.00E-25 | 97.4 |
| TcMYB62 | ATMYB65  | 42.73 | 110 | 62  | 1  | 85  | 411 | 43  | 152 | 4.00E-25 | 98.6 |
| TcMYB62 | ATMYB72  | 44.66 | 103 | 55  | 2  | 85  | 387 | 16  | 117 | 4.00E-25 | 95.9 |
| TcMYB62 | AtMYB17  | 45.63 | 103 | 54  | 2  | 85  | 387 | 14  | 115 | 4.00E-25 | 95.9 |
| TcMYB62 | ATMYB86  | 44.76 | 105 | 56  | 2  | 85  | 393 | 14  | 117 | 5.00E-25 | 96.7 |
| TcMYB62 | AtMYB114 | 38.05 | 113 | 69  | 1  | 85  | 420 | 10  | 122 | 5.00E-25 | 91.7 |
| TcMYB62 | ATMYB121 | 42.11 | 114 | 64  | 2  | 70  | 405 | 24  | 136 | 5.00E-25 | 95.1 |
| TcMYB62 | ATMYB75  | 34.38 | 128 | 83  | 1  | 85  | 465 | 10  | 137 | 6.00E-25 | 94.4 |
| TcMYB62 | AtMYB97  | 40.91 | 110 | 64  | 1  | 85  | 411 | 21  | 130 | 1.00E-24 | 96.3 |
| TcMYB62 | AtMYB9   | 42.16 | 102 | 58  | 1  | 85  | 387 | 14  | 115 | 1.00E-24 | 95.5 |
| TcMYB62 | AtMYB76  | 46.08 | 102 | 54  | 1  | 85  | 387 | 14  | 115 | 1.00E-24 | 95.5 |
| TcMYB62 | ATMYB28  | 43.81 | 105 | 58  | 1  | 85  | 396 | 14  | 118 | 1.00E-24 | 95.9 |
| TcMYB62 | ATMYB68  | 36.69 | 139 | 81  | 3  | 85  | 480 | 14  | 152 | 2.00E-24 | 95.5 |

|         |           |       |     |     |   |     |      |    |     |          |      |
|---------|-----------|-------|-----|-----|---|-----|------|----|-----|----------|------|
| TcMYB62 | ATMYB13   | 44.66 | 103 | 55  | 2 | 85  | 387  | 14 | 115 | 2.00E-24 | 93.2 |
| TcMYB62 | ATMYB13   | 27.87 | 61  | 44  | 1 | 85  | 267  | 67 | 126 | 5.00E-04 | 33.5 |
| TcMYB62 | ATMYB71   | 36.55 | 145 | 90  | 3 | 85  | 513  | 20 | 161 | 2.00E-24 | 93.6 |
| TcMYB62 | ATMYB59-3 | 42.2  | 109 | 61  | 2 | 85  | 405  | 10 | 117 | 2.00E-24 | 92.8 |
| TcMYB62 | ATMYB95   | 42.72 | 103 | 57  | 2 | 85  | 387  | 14 | 115 | 2.00E-24 | 93.6 |
| TcMYB62 | ATMYB48   | 43.12 | 109 | 60  | 2 | 85  | 405  | 9  | 116 | 2.00E-24 | 93.2 |
| TcMYB62 | AtMYB107  | 42.16 | 102 | 58  | 1 | 85  | 387  | 14 | 115 | 2.00E-24 | 94.4 |
| TcMYB62 | ATMYB55   | 35.26 | 156 | 87  | 3 | 85  | 510  | 14 | 167 | 2.00E-24 | 94.7 |
| TcMYB62 | AtMYB50   | 44.66 | 103 | 55  | 2 | 85  | 387  | 14 | 115 | 3.00E-24 | 94   |
| TcMYB62 | ATMYB37   | 42.59 | 108 | 60  | 2 | 70  | 387  | 9  | 116 | 3.00E-24 | 94   |
| TcMYB62 | AtMYB83   | 35.53 | 152 | 97  | 1 | 85  | 537  | 32 | 183 | 4.00E-24 | 94   |
| TcMYB62 | ATMYB38   | 43.69 | 103 | 56  | 2 | 85  | 387  | 14 | 116 | 4.00E-24 | 93.2 |
| TcMYB62 | AtMYB40   | 44.66 | 103 | 55  | 2 | 85  | 387  | 14 | 115 | 4.00E-24 | 92.4 |
| TcMYB62 | AtMYB81   | 41.82 | 110 | 63  | 1 | 85  | 411  | 22 | 131 | 5.00E-24 | 94.7 |
| TcMYB62 | MYB8      | 38.24 | 102 | 62  | 1 | 85  | 387  | 14 | 115 | 8.00E-24 | 90.5 |
| TcMYB62 | ATMYB5    | 40.2  | 102 | 60  | 1 | 85  | 387  | 25 | 126 | 8.00E-24 | 91.3 |
| TcMYB62 | ATMYB29   | 45.83 | 96  | 51  | 1 | 85  | 369  | 14 | 109 | 9.00E-24 | 92.8 |
| TcMYB62 | AtMYB112  | 32.43 | 185 | 124 | 5 | 85  | 636  | 34 | 190 | 1.00E-23 | 90.9 |
| TcMYB62 | ATMYB61   | 44.34 | 106 | 57  | 2 | 85  | 396  | 14 | 118 | 1.00E-23 | 92.8 |
| TcMYB62 | ATMYB26   | 33.8  | 142 | 81  | 3 | 85  | 471  | 14 | 155 | 1.00E-23 | 92.8 |
| TcMYB62 | ATMYB120  | 35.81 | 148 | 94  | 3 | 85  | 525  | 28 | 167 | 1.00E-23 | 94   |
| TcMYB62 | ATMYB3    | 40.78 | 103 | 59  | 2 | 85  | 387  | 14 | 115 | 1.00E-23 | 90.9 |
| TcMYB62 | ATMYB123  | 33.14 | 169 | 108 | 4 | 85  | 576  | 16 | 171 | 1.00E-23 | 90.9 |
| TcMYB62 | ATMYB46   | 42.59 | 108 | 60  | 2 | 85  | 402  | 20 | 126 | 1.00E-23 | 91.3 |
| TcMYB62 | AtMYB6    | 38.32 | 107 | 64  | 2 | 85  | 399  | 14 | 119 | 2.00E-23 | 90.1 |
| TcMYB62 | AtMYB79   | 35.17 | 145 | 92  | 3 | 85  | 513  | 8  | 149 | 2.00E-23 | 90.5 |
| TcMYB62 | ATMYB102  | 42.72 | 103 | 57  | 2 | 85  | 387  | 14 | 115 | 2.00E-23 | 92   |
| TcMYB62 | ATMYB4    | 40.78 | 103 | 59  | 2 | 85  | 387  | 14 | 115 | 2.00E-23 | 90.9 |
| TcMYB62 | AtMYB43   | 29.12 | 261 | 162 | 7 | 85  | 798  | 14 | 266 | 2.00E-23 | 91.7 |
| TcMYB62 | ATMYB88   | 29.03 | 186 | 127 | 3 | 94  | 636  | 33 | 217 | 5.00E-23 | 92   |
| TcMYB62 | MYB7      | 33.77 | 154 | 84  | 6 | 85  | 492  | 14 | 166 | 6.00E-23 | 89.4 |
| TcMYB62 | ATMYB57   | 37.32 | 142 | 87  | 4 | 64  | 483  | 20 | 148 | 6.00E-23 | 87.8 |
| TcMYB62 | ATMYB90   | 38.83 | 103 | 62  | 1 | 85  | 390  | 10 | 112 | 1.00E-22 | 88.2 |
| TcMYB62 | AtMYB42   | 35.92 | 142 | 79  | 3 | 85  | 474  | 14 | 154 | 1.00E-22 | 88.6 |
| TcMYB62 | AtMYB113  | 37.14 | 105 | 65  | 1 | 85  | 396  | 10 | 114 | 2.00E-22 | 87.4 |
| TcMYB62 | AtMYB22   | 37.96 | 108 | 67  | 1 | 94  | 417  | 57 | 163 | 2.00E-22 | 87.4 |
| TcMYB62 | AtMYB22   | 28.89 | 45  | 32  | 0 | 235 | 369  | 52 | 96  | 5.00E-04 | 33.5 |
| TcMYB62 | AtMYB32   | 39.81 | 103 | 60  | 2 | 85  | 387  | 14 | 115 | 3.00E-22 | 87.4 |
| TcMYB62 | AtMYB62   | 37.7  | 122 | 74  | 2 | 85  | 444  | 21 | 141 | 4.00E-22 | 87.4 |
| TcMYB62 | ATMYB2    | 35.51 | 138 | 88  | 2 | 64  | 474  | 15 | 142 | 4.00E-22 | 87   |
| TcMYB62 | ATMYB111  | 37.84 | 111 | 68  | 1 | 85  | 414  | 14 | 124 | 6.00E-22 | 87.8 |
| TcMYB62 | AtMYB116  | 35.25 | 122 | 77  | 2 | 85  | 444  | 20 | 140 | 7.00E-22 | 86.7 |
| TcMYB62 | ATMYB94   | 41.18 | 102 | 59  | 1 | 85  | 387  | 14 | 115 | 7.00E-22 | 87.4 |
| TcMYB62 | AtMYB108  | 40.52 | 116 | 67  | 3 | 64  | 405  | 14 | 124 | 8.00E-22 | 87   |
| TcMYB62 | AtMYB20   | 42.45 | 106 | 59  | 2 | 85  | 396  | 14 | 118 | 9.00E-22 | 86.3 |
| TcMYB62 | ATMYB30   | 41.18 | 102 | 59  | 1 | 85  | 387  | 14 | 115 | 1.00E-21 | 86.7 |
| TcMYB62 | ATMYB87   | 31.79 | 151 | 101 | 3 | 85  | 531  | 14 | 158 | 2.00E-21 | 85.9 |
| TcMYB62 | ATMYB96   | 40.2  | 102 | 60  | 1 | 85  | 387  | 14 | 115 | 2.00E-21 | 86.3 |
| TcMYB62 | ATMYB31   | 40.2  | 102 | 60  | 1 | 85  | 387  | 14 | 115 | 2.00E-21 | 85.9 |
| TcMYB62 | AtMYB85   | 42.72 | 103 | 57  | 2 | 85  | 387  | 14 | 115 | 3.00E-21 | 84.7 |
| TcMYB62 | AtMYB124  | 38.83 | 103 | 63  | 0 | 94  | 402  | 28 | 130 | 4.00E-21 | 86.3 |
| TcMYB62 | ATMYB12   | 38.24 | 102 | 62  | 1 | 85  | 387  | 14 | 115 | 5.00E-21 | 85.5 |
| TcMYB62 | AtMYB24   | 41.05 | 95  | 55  | 1 | 85  | 366  | 19 | 113 | 2.00E-20 | 81.3 |
| TcMYB62 | ATMYB3    | 41.05 | 95  | 55  | 1 | 85  | 366  | 22 | 116 | 4.00E-20 | 80.5 |
| TcMYB62 | AtMYB60   | 38.24 | 102 | 62  | 1 | 85  | 387  | 14 | 115 | 5.00E-20 | 81.3 |
| TcMYB62 | ATMYB11   | 37.25 | 102 | 63  | 1 | 85  | 387  | 14 | 115 | 6.00E-20 | 82   |
| TcMYB62 | ATMYB99   | 40.91 | 110 | 56  | 3 | 85  | 387  | 15 | 123 | 1.00E-18 | 77   |
| TcMYB62 | ATMYB91   | 33.64 | 110 | 70  | 1 | 85  | 405  | 4  | 113 | 1.00E-18 | 78.2 |
| TcMYB62 | ATMYB78   | 34.88 | 129 | 69  | 3 | 64  | 405  | 21 | 145 | 2.00E-18 | 77.4 |
| TcMYB63 | AtMYB50   | 68.45 | 187 | 56  | 3 | 25  | 576  | 2  | 184 | 3.00E-84 | 253  |
| TcMYB63 | ATMYB61   | 43.26 | 356 | 190 | 8 | 28  | 1059 | 3  | 311 | 1.00E-79 | 243  |
| TcMYB63 | ATMYB86   | 48.74 | 277 | 126 | 5 | 28  | 810  | 3  | 268 | 1.00E-78 | 240  |
| TcMYB63 | ATMYB55   | 57.69 | 208 | 74  | 3 | 28  | 609  | 3  | 208 | 1.00E-76 | 234  |
| TcMYB63 | ATMYB67   | 53.14 | 207 | 97  | 5 | 4   | 624  | 7  | 197 | 8.00E-69 | 213  |
| TcMYB63 | AtMYB32   | 59.33 | 150 | 61  | 1 | 28  | 477  | 3  | 146 | 4.00E-62 | 194  |
| TcMYB63 | MYB7      | 61.43 | 140 | 54  | 0 | 28  | 447  | 3  | 142 | 6.00E-61 | 191  |
| TcMYB63 | ATMYB35   | 46.01 | 213 | 109 | 3 | 28  | 648  | 3  | 212 | 6.00E-61 | 193  |
| TcMYB63 | ATMYB106  | 42.57 | 249 | 143 | 2 | 37  | 783  | 49 | 285 | 1.00E-60 | 194  |
| TcMYB63 | AtMYB42   | 55.95 | 168 | 74  | 2 | 28  | 531  | 3  | 166 | 1.00E-60 | 191  |
| TcMYB63 | AtMYB43   | 46.26 | 227 | 103 | 2 | 28  | 651  | 3  | 229 | 2.00E-60 | 192  |
| TcMYB63 | ATMYB26   | 66.91 | 139 | 37  | 1 | 31  | 420  | 4  | 142 | 2.00E-60 | 193  |
| TcMYB63 | ATMYB122  | 50.81 | 185 | 91  | 2 | 28  | 582  | 3  | 181 | 5.00E-60 | 191  |
| TcMYB63 | ATMYB16   | 50    | 196 | 89  | 3 | 28  | 588  | 3  | 194 | 6.00E-60 | 191  |
| TcMYB63 | ATMYB4    | 57.53 | 146 | 62  | 0 | 28  | 465  | 3  | 148 | 3.00E-59 | 187  |
| TcMYB63 | AtMYB85   | 48.51 | 202 | 104 | 4 | 28  | 633  | 3  | 191 | 5.00E-59 | 186  |
| TcMYB63 | AtMYB93   | 50.52 | 194 | 89  | 2 | 28  | 588  | 3  | 194 | 9.00E-59 | 189  |
| TcMYB63 | AtMYB103  | 58.78 | 148 | 61  | 1 | 31  | 474  | 4  | 147 | 1.00E-58 | 189  |
| TcMYB63 | ATMYB3    | 62.79 | 129 | 48  | 0 | 28  | 414  | 3  | 131 | 1.00E-58 | 185  |
| TcMYB63 | AtMYB17   | 54.09 | 159 | 73  | 0 | 28  | 504  | 3  | 161 | 2.00E-58 | 186  |
| TcMYB63 | ATMYB102  | 34.51 | 339 | 187 | 8 | 28  | 939  | 3  | 337 | 2.00E-58 | 187  |

|         |           |       |     |     |    |    |      |     |     |          |     |
|---------|-----------|-------|-----|-----|----|----|------|-----|-----|----------|-----|
| TcMYB63 | AtMYB6    | 52.66 | 169 | 80  | 1  | 28 | 534  | 3   | 165 | 2.00E-58 | 184 |
| TcMYB63 | AtMYB107  | 39.72 | 282 | 150 | 6  | 28 | 813  | 3   | 284 | 3.00E-58 | 186 |
| TcMYB63 | MYB8      | 62.02 | 129 | 49  | 0  | 28 | 414  | 3   | 131 | 1.00E-57 | 181 |
| TcMYB63 | ATMYB80   | 42.34 | 248 | 108 | 7  | 37 | 675  | 6   | 248 | 2.00E-57 | 184 |
| TcMYB63 | ATMYB46   | 52.51 | 179 | 83  | 2  | 49 | 579  | 16  | 192 | 2.00E-57 | 182 |
| TcMYB63 | AtMYB20   | 62.5  | 136 | 51  | 0  | 28 | 435  | 3   | 138 | 4.00E-57 | 182 |
| TcMYB63 | AtMYB53   | 69.83 | 116 | 35  | 0  | 55 | 402  | 12  | 127 | 5.00E-57 | 182 |
| TcMYB63 | AtMYB51   | 47.14 | 210 | 109 | 4  | 28 | 651  | 3   | 209 | 5.00E-57 | 184 |
| TcMYB63 | AtMYB74   | 64.57 | 127 | 45  | 0  | 19 | 399  | 1   | 127 | 7.00E-57 | 182 |
| TcMYB63 | ATMYB28   | 45.41 | 207 | 106 | 2  | 28 | 627  | 3   | 207 | 8.00E-57 | 184 |
| TcMYB63 | ATMYB34   | 44.93 | 207 | 114 | 1  | 28 | 648  | 3   | 205 | 9.00E-57 | 181 |
| TcMYB63 | AtMYB9    | 63.2  | 125 | 46  | 0  | 28 | 402  | 3   | 127 | 5.00E-56 | 181 |
| TcMYB63 | ATMYB92   | 64.46 | 121 | 43  | 0  | 55 | 417  | 12  | 132 | 7.00E-56 | 180 |
| TcMYB63 | ATMYB72   | 47.62 | 189 | 93  | 3  | 19 | 567  | 1   | 184 | 1.00E-55 | 179 |
| TcMYB63 | ATMYB5    | 63.71 | 124 | 45  | 0  | 37 | 408  | 17  | 140 | 2.00E-55 | 176 |
| TcMYB63 | AtMYB40   | 55.41 | 157 | 67  | 2  | 19 | 480  | 1   | 156 | 3.00E-55 | 176 |
| TcMYB63 | ATMYB13   | 55.49 | 164 | 68  | 3  | 19 | 495  | 1   | 161 | 5.00E-55 | 175 |
| TcMYB63 | AtMYB41   | 63.71 | 124 | 45  | 0  | 28 | 399  | 3   | 126 | 1.00E-54 | 176 |
| TcMYB63 | AtMYB10   | 53.09 | 162 | 72  | 2  | 25 | 498  | 4   | 163 | 1.00E-54 | 174 |
| TcMYB63 | AtMYB83   | 66.94 | 124 | 37  | 1  | 13 | 372  | 12  | 135 | 1.00E-54 | 177 |
| TcMYB63 | ATMYB63   | 41.81 | 232 | 120 | 5  | 19 | 669  | 1   | 221 | 2.00E-54 | 175 |
| TcMYB63 | ATMYB29   | 44.17 | 206 | 115 | 1  | 28 | 645  | 3   | 199 | 3.00E-54 | 176 |
| TcMYB63 | AtMYB49   | 66.95 | 118 | 39  | 0  | 46 | 399  | 9   | 126 | 5.00E-54 | 175 |
| TcMYB63 | AtMYB76   | 45.45 | 209 | 107 | 3  | 40 | 645  | 7   | 215 | 9.00E-54 | 175 |
| TcMYB63 | ATMYB95   | 46.96 | 181 | 90  | 2  | 55 | 579  | 12  | 180 | 1.00E-53 | 172 |
| TcMYB63 | ATMYB15   | 42.65 | 204 | 114 | 4  | 28 | 630  | 3   | 199 | 9.00E-53 | 171 |
| TcMYB63 | ATMYB99   | 57.55 | 139 | 52  | 1  | 19 | 414  | 1   | 139 | 2.00E-52 | 169 |
| TcMYB63 | ATMYB14   | 45.07 | 213 | 106 | 6  | 28 | 633  | 3   | 203 | 4.00E-52 | 168 |
| TcMYB63 | ATMYB58   | 54    | 150 | 68  | 2  | 19 | 465  | 1   | 145 | 1.00E-51 | 167 |
| TcMYB63 | AtMYB47   | 60.17 | 118 | 47  | 0  | 55 | 408  | 12  | 129 | 2.00E-50 | 164 |
| TcMYB63 | AtMYB60   | 44.63 | 177 | 97  | 1  | 28 | 555  | 3   | 179 | 1.00E-49 | 162 |
| TcMYB63 | AtMYB19   | 43.48 | 207 | 115 | 3  | 46 | 660  | 9   | 199 | 2.00E-49 | 161 |
| TcMYB63 | AtMYB45   | 51.43 | 140 | 68  | 0  | 46 | 465  | 15  | 154 | 3.00E-49 | 160 |
| TcMYB63 | ATMYB37   | 43.5  | 200 | 112 | 3  | 28 | 624  | 3   | 182 | 1.00E-48 | 161 |
| TcMYB63 | ATMYB12   | 52.38 | 147 | 70  | 0  | 28 | 468  | 3   | 149 | 3.00E-48 | 161 |
| TcMYB63 | ATMYB111  | 64.91 | 114 | 40  | 0  | 28 | 369  | 3   | 116 | 5.00E-48 | 160 |
| TcMYB63 | ATMYB94   | 33.81 | 352 | 224 | 10 | 28 | 1056 | 3   | 318 | 8.00E-48 | 159 |
| TcMYB63 | AtMYB36   | 44.2  | 181 | 96  | 3  | 28 | 555  | 3   | 179 | 8.00E-48 | 159 |
| TcMYB63 | ATMYB96   | 51.68 | 149 | 72  | 2  | 28 | 474  | 3   | 148 | 2.00E-47 | 159 |
| TcMYB63 | ATMYB30   | 48.99 | 149 | 76  | 0  | 28 | 474  | 3   | 151 | 3.00E-47 | 157 |
| TcMYB63 | AtMYB18   | 43.87 | 212 | 111 | 4  | 49 | 660  | 8   | 217 | 5.00E-47 | 155 |
| TcMYB63 | ATMYB11   | 43.08 | 195 | 99  | 1  | 28 | 576  | 3   | 197 | 5.00E-47 | 157 |
| TcMYB63 | ATMYB71   | 44.57 | 184 | 102 | 3  | 58 | 609  | 19  | 192 | 1.00E-46 | 154 |
| TcMYB63 | AtMYB79   | 42.79 | 201 | 112 | 2  | 58 | 651  | 7   | 207 | 1.00E-46 | 154 |
| TcMYB63 | ATMYB123  | 61.02 | 118 | 45  | 1  | 19 | 369  | 1   | 118 | 2.00E-46 | 153 |
| TcMYB63 | ATMYB66   | 42.46 | 179 | 98  | 3  | 58 | 579  | 17  | 193 | 6.00E-46 | 150 |
| TcMYB63 | ATMYB84   | 59.32 | 118 | 47  | 1  | 28 | 378  | 3   | 120 | 7.00E-46 | 153 |
| TcMYB63 | ATMYB57   | 48.1  | 158 | 77  | 2  | 13 | 471  | 6   | 161 | 5.00E-45 | 148 |
| TcMYB63 | ATMYB38   | 50    | 142 | 70  | 1  | 28 | 450  | 3   | 144 | 5.00E-45 | 150 |
| TcMYB63 | ATMYB23   | 45.73 | 164 | 87  | 4  | 46 | 531  | 9   | 167 | 7.00E-45 | 148 |
| TcMYB63 | ATMYB68   | 58.47 | 118 | 48  | 1  | 28 | 378  | 3   | 120 | 1.00E-44 | 152 |
| TcMYB63 | ATMYB31   | 60.53 | 114 | 45  | 0  | 28 | 369  | 3   | 116 | 1.00E-44 | 150 |
| TcMYB63 | ATMYB3    | 47.13 | 157 | 82  | 3  | 52 | 519  | 19  | 169 | 2.00E-44 | 147 |
| TcMYB63 | ATMYB87   | 47.77 | 157 | 80  | 2  | 28 | 492  | 3   | 159 | 2.00E-44 | 149 |
| TcMYB63 | ATMYB121  | 44.31 | 167 | 93  | 1  | 46 | 546  | 24  | 188 | 4.00E-44 | 147 |
| TcMYB63 | ATMYB0    | 57.94 | 107 | 45  | 0  | 49 | 369  | 12  | 118 | 5.00E-44 | 146 |
| TcMYB63 | AtMYB82   | 57.94 | 107 | 45  | 0  | 46 | 366  | 9   | 115 | 2.00E-43 | 143 |
| TcMYB63 | AtMYB114  | 60.58 | 104 | 41  | 0  | 55 | 366  | 8   | 111 | 3.00E-43 | 141 |
| TcMYB63 | AtMYB62   | 39.3  | 201 | 122 | 2  | 49 | 651  | 17  | 203 | 8.00E-43 | 144 |
| TcMYB63 | AtMYB116  | 45.58 | 147 | 80  | 0  | 58 | 498  | 19  | 165 | 1.00E-42 | 144 |
| TcMYB63 | AtMYB108  | 56.03 | 116 | 51  | 0  | 55 | 402  | 19  | 134 | 2.00E-42 | 144 |
| TcMYB63 | AtMYB112  | 57.01 | 107 | 46  | 0  | 52 | 372  | 31  | 137 | 2.00E-42 | 142 |
| TcMYB63 | ATMYB59-3 | 43.95 | 157 | 82  | 1  | 46 | 498  | 5   | 161 | 2.00E-42 | 142 |
| TcMYB63 | AtMYB81   | 48.12 | 133 | 58  | 1  | 46 | 411  | 17  | 149 | 2.00E-42 | 147 |
| TcMYB63 | ATMYB90   | 55.46 | 119 | 44  | 1  | 55 | 384  | 8   | 126 | 2.00E-42 | 142 |
| TcMYB63 | ATMYB48   | 48.53 | 136 | 70  | 0  | 58 | 465  | 8   | 143 | 3.00E-42 | 142 |
| TcMYB63 | ATMYB75   | 55    | 120 | 46  | 1  | 55 | 390  | 8   | 127 | 3.00E-42 | 142 |
| TcMYB63 | ATMYB101  | 42.86 | 161 | 92  | 1  | 55 | 537  | 18  | 177 | 3.00E-42 | 147 |
| TcMYB63 | ATMYB33   | 61.54 | 104 | 40  | 0  | 55 | 366  | 32  | 135 | 5.00E-42 | 147 |
| TcMYB63 | AtMYB97   | 59.22 | 103 | 42  | 0  | 55 | 363  | 19  | 121 | 1.00E-41 | 144 |
| TcMYB63 | ATMYB120  | 58.88 | 107 | 44  | 0  | 55 | 375  | 26  | 132 | 1.00E-41 | 146 |
| TcMYB63 | AtMYB24   | 53.72 | 121 | 56  | 0  | 52 | 414  | 16  | 136 | 2.00E-41 | 139 |
| TcMYB63 | ATMYB65   | 59.62 | 104 | 42  | 0  | 55 | 366  | 41  | 144 | 1.00E-40 | 144 |
| TcMYB63 | AtMYB113  | 56.48 | 108 | 47  | 0  | 55 | 378  | 8   | 115 | 7.00E-40 | 135 |
| TcMYB63 | AtMYB27   | 56.07 | 107 | 47  | 0  | 46 | 366  | 6   | 112 | 3.00E-39 | 134 |
| TcMYB63 | ATMYB2    | 47.83 | 115 | 60  | 0  | 55 | 399  | 20  | 134 | 1.00E-37 | 130 |
| TcMYB63 | AtMYB104  | 51.33 | 113 | 55  | 1  | 46 | 384  | 13  | 124 | 3.00E-36 | 129 |
| TcMYB63 | ATMYB78   | 46.15 | 130 | 56  | 1  | 55 | 402  | 26  | 155 | 5.00E-36 | 127 |
| TcMYB63 | AtMYB98   | 45.05 | 111 | 61  | 1  | 46 | 378  | 212 | 321 | 3.00E-30 | 113 |
| TcMYB63 | ATMYB77   | 33.66 | 205 | 129 | 4  | 61 | 654  | 6   | 201 | 1.00E-29 | 109 |

|         |           |       |     |     |   |     |     |     |     |          |      |
|---------|-----------|-------|-----|-----|---|-----|-----|-----|-----|----------|------|
| TcMYB63 | ATMYB25   | 36.81 | 182 | 105 | 4 | 61  | 576 | 50  | 229 | 2.00E-29 | 110  |
| TcMYB63 | ATMYB73   | 49.07 | 108 | 54  | 2 | 61  | 381 | 13  | 118 | 4.00E-29 | 108  |
| TcMYB63 | ATMYB44   | 50.49 | 103 | 50  | 2 | 61  | 366 | 6   | 106 | 4.00E-29 | 108  |
| TcMYB63 | AtMYB70   | 49.07 | 108 | 54  | 2 | 61  | 381 | 13  | 118 | 1.00E-28 | 107  |
| TcMYB63 | ATMYB118  | 40.16 | 122 | 71  | 2 | 7   | 366 | 169 | 289 | 3.00E-28 | 108  |
| TcMYB63 | ATMYB118  | 29.09 | 55  | 38  | 1 | 220 | 381 | 189 | 243 | 1.00E-04 | 35.8 |
| TcMYB63 | ATMYB54   | 32.99 | 197 | 121 | 5 | 61  | 618 | 6   | 191 | 3.00E-28 | 104  |
| TcMYB63 | ATMYB119  | 39.39 | 132 | 79  | 3 | 49  | 441 | 101 | 225 | 9.00E-28 | 106  |
| TcMYB63 | AtMYB115  | 44.76 | 105 | 56  | 2 | 43  | 351 | 150 | 253 | 1.00E-27 | 105  |
| TcMYB63 | AtMYB64   | 31.77 | 192 | 130 | 6 | 61  | 633 | 105 | 282 | 3.00E-27 | 105  |
| TcMYB63 | AtMYB1    | 41.43 | 140 | 81  | 3 | 61  | 477 | 55  | 188 | 4.00E-27 | 104  |
| TcMYB63 | AtMYB109  | 51.46 | 103 | 49  | 2 | 61  | 366 | 56  | 156 | 2.00E-26 | 102  |
| TcMYB63 | ATMYB52   | 36.81 | 144 | 84  | 3 | 61  | 471 | 5   | 146 | 3.00E-26 | 99   |
| TcMYB63 | ATMYB105  | 41.88 | 117 | 65  | 3 | 37  | 378 | 97  | 211 | 4.00E-26 | 100  |
| TcMYB63 | AtMYB117  | 43.52 | 108 | 60  | 2 | 55  | 375 | 96  | 201 | 7.00E-25 | 97.4 |
| TcMYB63 | AtMYB100  | 38.39 | 112 | 69  | 1 | 46  | 381 | 21  | 131 | 3.00E-23 | 90.5 |
| TcMYB63 | ATMYB69   | 38.74 | 111 | 67  | 2 | 46  | 375 | 14  | 122 | 3.00E-23 | 90.5 |
| TcMYB63 | ATMYB110  | 32.82 | 131 | 88  | 2 | 61  | 453 | 67  | 191 | 6.00E-23 | 90.9 |
| TcMYB63 | AtMYB56   | 39.05 | 105 | 64  | 1 | 61  | 375 | 93  | 196 | 8.00E-23 | 90.9 |
| TcMYB63 | ATMYB91   | 28.39 | 236 | 147 | 7 | 70  | 711 | 7   | 233 | 3.00E-22 | 89.7 |
| TcMYB63 | ATMYB88   | 27.8  | 223 | 137 | 5 | 70  | 666 | 33  | 246 | 4.00E-20 | 84.3 |
| TcMYB63 | AtMYB124  | 32.35 | 136 | 89  | 2 | 70  | 468 | 28  | 162 | 9.00E-20 | 83.2 |
| TcMYB63 | AtMYB22   | 37.5  | 112 | 69  | 4 | 46  | 378 | 49  | 156 | 2.00E-19 | 80.1 |
| TcMYB63 | AtMYB89   | 32.43 | 111 | 75  | 1 | 46  | 378 | 51  | 160 | 3.00E-18 | 75.1 |
| TcMYB64 | ATMYB77   | 53.64 | 220 | 93  | 5 | 19  | 651 | 2   | 213 | 8.00E-68 | 211  |
| TcMYB64 | ATMYB44   | 54.55 | 209 | 95  | 4 | 19  | 645 | 2   | 200 | 5.00E-67 | 209  |
| TcMYB64 | ATMYB73   | 50.88 | 228 | 105 | 6 | 22  | 684 | 10  | 215 | 7.00E-64 | 201  |
| TcMYB64 | AtMYB70   | 49.39 | 247 | 105 | 7 | 22  | 702 | 10  | 241 | 1.00E-63 | 200  |
| TcMYB64 | AtMYB109  | 52.38 | 168 | 79  | 3 | 13  | 513 | 50  | 206 | 2.00E-52 | 173  |
| TcMYB64 | AtMYB1    | 44.55 | 202 | 91  | 3 | 10  | 552 | 48  | 249 | 1.00E-48 | 163  |
| TcMYB64 | ATMYB25   | 60.18 | 113 | 45  | 0 | 4   | 342 | 41  | 153 | 2.00E-43 | 148  |
| TcMYB64 | ATMYB119  | 37.27 | 161 | 98  | 1 | 7   | 480 | 97  | 257 | 5.00E-37 | 132  |
| TcMYB64 | AtMYB56   | 53.85 | 104 | 48  | 0 | 31  | 342 | 93  | 196 | 1.00E-36 | 129  |
| TcMYB64 | ATMYB52   | 50    | 104 | 52  | 0 | 31  | 342 | 5   | 108 | 1.00E-36 | 127  |
| TcMYB64 | ATMYB54   | 47.15 | 123 | 65  | 0 | 31  | 399 | 6   | 128 | 2.00E-36 | 127  |
| TcMYB64 | ATMYB105  | 52.88 | 104 | 49  | 0 | 31  | 342 | 107 | 210 | 2.00E-36 | 129  |
| TcMYB64 | AtMYB117  | 51.85 | 108 | 52  | 0 | 31  | 354 | 98  | 205 | 3.00E-36 | 129  |
| TcMYB64 | ATMYB69   | 50.96 | 104 | 51  | 0 | 31  | 342 | 19  | 122 | 1.00E-35 | 125  |
| TcMYB64 | AtMYB64   | 45.76 | 118 | 64  | 0 | 28  | 381 | 104 | 221 | 1.00E-34 | 125  |
| TcMYB64 | ATMYB110  | 33.48 | 227 | 128 | 4 | 31  | 642 | 67  | 274 | 9.00E-34 | 121  |
| TcMYB64 | ATMYB118  | 46.56 | 131 | 70  | 1 | 19  | 411 | 185 | 311 | 3.00E-33 | 122  |
| TcMYB64 | ATMYB59-3 | 31.02 | 216 | 147 | 5 | 31  | 672 | 10  | 202 | 9.00E-33 | 116  |
| TcMYB64 | ATMYB121  | 36.22 | 196 | 123 | 4 | 31  | 612 | 29  | 214 | 2.00E-32 | 117  |
| TcMYB64 | ATMYB63   | 39.52 | 167 | 94  | 4 | 31  | 510 | 16  | 178 | 7.00E-32 | 115  |
| TcMYB64 | ATMYB46   | 41.84 | 141 | 81  | 1 | 31  | 450 | 20  | 160 | 1.00E-31 | 115  |
| TcMYB64 | ATMYB48   | 39.02 | 164 | 98  | 4 | 1   | 486 | 2   | 151 | 1.00E-31 | 114  |
| TcMYB64 | ATMYB101  | 37.5  | 184 | 105 | 5 | 31  | 552 | 20  | 199 | 2.00E-31 | 117  |
| TcMYB64 | AtMYB98   | 50    | 102 | 51  | 0 | 28  | 333 | 216 | 317 | 4.00E-31 | 116  |
| TcMYB64 | ATMYB14   | 41.43 | 140 | 78  | 5 | 31  | 438 | 14  | 146 | 3.00E-30 | 110  |
| TcMYB64 | AtMYB116  | 43.24 | 111 | 62  | 1 | 19  | 348 | 16  | 126 | 5.00E-30 | 110  |
| TcMYB64 | ATMYB96   | 30.54 | 239 | 155 | 5 | 31  | 714 | 14  | 227 | 1.00E-29 | 110  |
| TcMYB64 | AtMYB17   | 51.46 | 103 | 48  | 2 | 31  | 333 | 14  | 115 | 1.00E-29 | 109  |
| TcMYB64 | AtMYB115  | 47    | 100 | 53  | 0 | 31  | 330 | 158 | 257 | 3.00E-29 | 110  |
| TcMYB64 | AtMYB62   | 44.44 | 108 | 58  | 2 | 31  | 348 | 21  | 127 | 3.00E-29 | 108  |
| TcMYB64 | AtMYB97   | 50.5  | 101 | 49  | 1 | 31  | 330 | 21  | 121 | 3.00E-29 | 110  |
| TcMYB64 | AtMYB79   | 47.62 | 105 | 53  | 2 | 31  | 339 | 8   | 111 | 3.00E-29 | 107  |
| TcMYB64 | AtMYB51   | 50    | 102 | 50  | 1 | 31  | 333 | 15  | 116 | 3.00E-29 | 109  |
| TcMYB64 | ATMYB30   | 35.24 | 210 | 116 | 7 | 31  | 600 | 14  | 215 | 4.00E-29 | 108  |
| TcMYB64 | ATMYB57   | 35.62 | 160 | 102 | 3 | 7   | 483 | 21  | 170 | 4.00E-29 | 105  |
| TcMYB64 | ATMYB92   | 49.51 | 103 | 50  | 2 | 31  | 333 | 14  | 115 | 4.00E-29 | 108  |
| TcMYB64 | ATMYB65   | 48.08 | 104 | 53  | 1 | 31  | 339 | 43  | 146 | 5.00E-29 | 111  |
| TcMYB64 | ATMYB72   | 39.46 | 147 | 87  | 3 | 31  | 465 | 16  | 160 | 6.00E-29 | 107  |
| TcMYB64 | AtMYB24   | 33.53 | 170 | 106 | 3 | 13  | 501 | 13  | 182 | 7.00E-29 | 105  |
| TcMYB64 | ATMYB34   | 48.57 | 105 | 53  | 1 | 31  | 342 | 14  | 118 | 1.00E-28 | 107  |
| TcMYB64 | AtMYB41   | 49.51 | 103 | 50  | 2 | 31  | 333 | 14  | 115 | 1.00E-28 | 106  |
| TcMYB64 | ATMYB35   | 46.73 | 107 | 55  | 2 | 31  | 345 | 14  | 119 | 1.00E-28 | 107  |
| TcMYB64 | AtMYB10   | 42.11 | 133 | 75  | 2 | 31  | 423 | 16  | 147 | 1.00E-28 | 105  |
| TcMYB64 | ATMYB15   | 39.13 | 138 | 82  | 2 | 31  | 438 | 14  | 150 | 2.00E-28 | 106  |
| TcMYB64 | AtMYB45   | 38.27 | 162 | 96  | 4 | 31  | 504 | 20  | 177 | 2.00E-28 | 105  |
| TcMYB64 | AtMYB107  | 47.57 | 103 | 52  | 2 | 31  | 333 | 14  | 115 | 2.00E-28 | 106  |
| TcMYB64 | ATMYB120  | 50.5  | 101 | 49  | 1 | 31  | 330 | 28  | 128 | 2.00E-28 | 109  |
| TcMYB64 | AtMYB83   | 46.72 | 122 | 62  | 2 | 31  | 387 | 32  | 153 | 3.00E-28 | 107  |
| TcMYB64 | ATMYB67   | 42.75 | 131 | 73  | 3 | 31  | 417 | 24  | 151 | 3.00E-28 | 106  |
| TcMYB64 | ATMYB33   | 48.08 | 104 | 53  | 1 | 31  | 339 | 34  | 137 | 3.00E-28 | 108  |
| TcMYB64 | AtMYB60   | 39.46 | 147 | 78  | 3 | 31  | 438 | 14  | 159 | 6.00E-28 | 104  |
| TcMYB64 | ATMYB71   | 45.71 | 105 | 55  | 2 | 31  | 339 | 20  | 123 | 6.00E-28 | 104  |
| TcMYB64 | ATMYB26   | 44.44 | 117 | 55  | 2 | 31  | 351 | 14  | 130 | 7.00E-28 | 106  |
| TcMYB64 | AtMYB89   | 43.43 | 99  | 56  | 0 | 34  | 330 | 57  | 155 | 7.00E-28 | 102  |
| TcMYB64 | ATMYB122  | 41.3  | 138 | 71  | 3 | 31  | 414 | 14  | 151 | 8.00E-28 | 105  |
| TcMYB64 | ATMYB80   | 47.06 | 102 | 53  | 1 | 31  | 333 | 14  | 115 | 8.00E-28 | 105  |

|         |           |       |     |     |   |    |     |    |     |          |      |
|---------|-----------|-------|-----|-----|---|----|-----|----|-----|----------|------|
| TcMYB64 | AtMYB27   | 44.95 | 109 | 58  | 2 | 31 | 351 | 11 | 118 | 9.00E-28 | 103  |
| TcMYB64 | AtMYB53   | 48.54 | 103 | 51  | 2 | 31 | 333 | 14 | 115 | 1.00E-27 | 104  |
| TcMYB64 | ATMYB13   | 39.33 | 150 | 79  | 4 | 31 | 444 | 14 | 159 | 1.00E-27 | 103  |
| TcMYB64 | ATMYB94   | 29.7  | 266 | 185 | 6 | 31 | 822 | 14 | 268 | 1.00E-27 | 105  |
| TcMYB64 | AtMYB18   | 43.9  | 123 | 65  | 2 | 31 | 387 | 12 | 134 | 1.00E-27 | 103  |
| TcMYB64 | AtMYB40   | 41.67 | 120 | 65  | 3 | 1  | 345 | 1  | 119 | 1.00E-27 | 103  |
| TcMYB64 | AtMYB47   | 37.18 | 156 | 79  | 4 | 31 | 441 | 14 | 168 | 2.00E-27 | 103  |
| TcMYB64 | ATMYB106  | 42.11 | 133 | 76  | 2 | 31 | 426 | 57 | 183 | 2.00E-27 | 105  |
| TcMYB64 | ATMYB87   | 39.58 | 144 | 76  | 3 | 31 | 429 | 14 | 157 | 2.00E-27 | 103  |
| TcMYB64 | ATMYB3    | 38.81 | 134 | 81  | 2 | 31 | 429 | 22 | 150 | 2.00E-27 | 102  |
| TcMYB64 | AtMYB19   | 47.57 | 103 | 52  | 2 | 31 | 333 | 14 | 115 | 3.00E-27 | 102  |
| TcMYB64 | AtMYB74   | 48.04 | 102 | 52  | 1 | 31 | 333 | 15 | 116 | 3.00E-27 | 103  |
| TcMYB64 | ATMYB55   | 39.87 | 158 | 70  | 4 | 31 | 429 | 14 | 171 | 3.00E-27 | 103  |
| TcMYB64 | ATMYB37   | 49.51 | 103 | 50  | 2 | 31 | 333 | 14 | 116 | 3.00E-27 | 103  |
| TcMYB64 | ATMYB31   | 40.15 | 132 | 76  | 3 | 31 | 417 | 14 | 144 | 3.00E-27 | 103  |
| TcMYB64 | ATMYB95   | 47.57 | 103 | 52  | 2 | 31 | 333 | 14 | 115 | 4.00E-27 | 102  |
| TcMYB64 | ATMYB86   | 48.54 | 103 | 51  | 2 | 31 | 333 | 14 | 115 | 5.00E-27 | 103  |
| TcMYB64 | ATMYB38   | 49.51 | 103 | 50  | 2 | 31 | 333 | 14 | 116 | 5.00E-27 | 102  |
| TcMYB64 | ATMYB16   | 46.6  | 103 | 53  | 2 | 31 | 333 | 14 | 115 | 6.00E-27 | 102  |
| TcMYB64 | AtMYB103  | 45.37 | 108 | 58  | 1 | 31 | 351 | 14 | 121 | 6.00E-27 | 103  |
| TcMYB64 | ATMYB2    | 45.05 | 111 | 59  | 2 | 19 | 345 | 18 | 127 | 6.00E-27 | 101  |
| TcMYB64 | AtMYB36   | 39.86 | 138 | 77  | 4 | 31 | 426 | 14 | 146 | 7.00E-27 | 102  |
| TcMYB64 | ATMYB3    | 41.09 | 129 | 75  | 1 | 31 | 414 | 14 | 142 | 1.00E-26 | 100  |
| TcMYB64 | ATMYB111  | 39.35 | 155 | 88  | 4 | 31 | 477 | 14 | 167 | 1.00E-26 | 102  |
| TcMYB64 | ATMYB58   | 39.19 | 148 | 86  | 4 | 31 | 462 | 16 | 162 | 2.00E-26 | 100  |
| TcMYB64 | ATMYB66   | 43.24 | 111 | 61  | 2 | 7  | 333 | 10 | 119 | 2.00E-26 | 98.6 |
| TcMYB64 | AtMYB9    | 47.57 | 103 | 52  | 2 | 31 | 333 | 14 | 115 | 2.00E-26 | 101  |
| TcMYB64 | ATMYB102  | 47.06 | 102 | 53  | 1 | 31 | 333 | 14 | 115 | 2.00E-26 | 101  |
| TcMYB64 | ATMYB0    | 40.62 | 128 | 73  | 2 | 7  | 381 | 8  | 135 | 2.00E-26 | 99   |
| TcMYB64 | AtMYB49   | 45.1  | 102 | 55  | 1 | 31 | 333 | 14 | 115 | 3.00E-26 | 100  |
| TcMYB64 | AtMYB93   | 46.08 | 102 | 54  | 1 | 31 | 333 | 14 | 115 | 3.00E-26 | 101  |
| TcMYB64 | ATMYB61   | 38.85 | 157 | 92  | 4 | 31 | 489 | 14 | 163 | 3.00E-26 | 101  |
| TcMYB64 | AtMYB108  | 42.73 | 110 | 61  | 2 | 22 | 345 | 18 | 126 | 3.00E-26 | 100  |
| TcMYB64 | AtMYB82   | 43.24 | 111 | 61  | 2 | 7  | 333 | 6  | 115 | 3.00E-26 | 97.8 |
| TcMYB64 | AtMYB50   | 40.85 | 142 | 71  | 4 | 31 | 417 | 14 | 154 | 3.00E-26 | 100  |
| TcMYB64 | ATMYB28   | 34.29 | 175 | 114 | 2 | 31 | 552 | 14 | 181 | 4.00E-26 | 101  |
| TcMYB64 | AtMYB81   | 48.51 | 101 | 51  | 1 | 31 | 330 | 22 | 122 | 4.00E-26 | 102  |
| TcMYB64 | AtMYB85   | 39.71 | 136 | 80  | 3 | 31 | 432 | 14 | 142 | 7.00E-26 | 98.6 |
| TcMYB64 | MYB7      | 38.31 | 154 | 90  | 4 | 31 | 477 | 14 | 167 | 7.00E-26 | 98.6 |
| TcMYB64 | ATMYB23   | 45.63 | 103 | 54  | 2 | 31 | 333 | 14 | 115 | 1.00E-25 | 96.7 |
| TcMYB64 | MYB8      | 45.1  | 102 | 55  | 1 | 31 | 333 | 14 | 115 | 2.00E-25 | 95.9 |
| TcMYB64 | AtMYB6    | 46.08 | 102 | 54  | 1 | 31 | 333 | 14 | 115 | 3.00E-25 | 96.3 |
| TcMYB64 | ATMYB4    | 39.42 | 137 | 82  | 2 | 31 | 438 | 14 | 144 | 5.00E-25 | 96.7 |
| TcMYB64 | ATMYB5    | 46.08 | 102 | 54  | 1 | 31 | 333 | 25 | 126 | 5.00E-25 | 95.9 |
| TcMYB64 | ATMYB68   | 46.6  | 103 | 53  | 2 | 31 | 333 | 14 | 116 | 7.00E-25 | 97.8 |
| TcMYB64 | AtMYB104  | 44.76 | 105 | 53  | 2 | 31 | 330 | 18 | 118 | 7.00E-25 | 97.8 |
| TcMYB64 | ATMYB123  | 44.66 | 103 | 55  | 2 | 31 | 333 | 16 | 117 | 8.00E-25 | 95.5 |
| TcMYB64 | ATMYB84   | 45.63 | 103 | 54  | 2 | 31 | 333 | 14 | 116 | 1.00E-24 | 96.3 |
| TcMYB64 | AtMYB76   | 45.1  | 102 | 55  | 1 | 31 | 333 | 14 | 115 | 1.00E-24 | 96.7 |
| TcMYB64 | ATMYB29   | 45.54 | 101 | 54  | 1 | 31 | 330 | 14 | 114 | 1.00E-24 | 96.3 |
| TcMYB64 | AtMYB112  | 39.62 | 106 | 63  | 1 | 31 | 345 | 34 | 139 | 1.00E-24 | 94.4 |
| TcMYB64 | AtMYB20   | 41.12 | 107 | 61  | 2 | 31 | 345 | 14 | 119 | 2.00E-24 | 95.1 |
| TcMYB64 | AtMYB100  | 32.61 | 138 | 92  | 2 | 7  | 417 | 20 | 155 | 3.00E-24 | 93.2 |
| TcMYB64 | AtMYB43   | 42.06 | 107 | 60  | 2 | 31 | 345 | 14 | 119 | 4.00E-24 | 94.7 |
| TcMYB64 | AtMYB114  | 40.95 | 105 | 60  | 2 | 31 | 339 | 10 | 113 | 6.00E-24 | 89.7 |
| TcMYB64 | AtMYB32   | 45.63 | 103 | 54  | 2 | 31 | 333 | 14 | 115 | 7.00E-24 | 93.2 |
| TcMYB64 | ATMYB12   | 43.14 | 102 | 57  | 1 | 31 | 333 | 14 | 115 | 7.00E-24 | 94.7 |
| TcMYB64 | ATMYB12   | 23.84 | 151 | 112 | 4 | 19 | 462 | 63 | 207 | 1.00E-04 | 35.8 |
| TcMYB64 | ATMYB11   | 45.1  | 102 | 55  | 1 | 31 | 333 | 14 | 115 | 1.00E-23 | 94   |
| TcMYB64 | AtMYB42   | 43.69 | 103 | 56  | 2 | 31 | 333 | 14 | 115 | 1.00E-23 | 92.8 |
| TcMYB64 | ATMYB78   | 36.67 | 120 | 61  | 2 | 31 | 345 | 28 | 147 | 3.00E-22 | 89.4 |
| TcMYB64 | ATMYB75   | 40    | 105 | 61  | 2 | 31 | 339 | 10 | 113 | 3.00E-22 | 87.8 |
| TcMYB64 | AtMYB113  | 40.57 | 106 | 61  | 2 | 31 | 342 | 10 | 114 | 4.00E-22 | 87.4 |
| TcMYB64 | ATMYB99   | 42.73 | 110 | 54  | 3 | 31 | 333 | 15 | 123 | 8.00E-22 | 86.7 |
| TcMYB64 | ATMYB88   | 30.92 | 152 | 100 | 2 | 40 | 480 | 33 | 178 | 1.00E-21 | 89   |
| TcMYB64 | ATMYB88   | 29.85 | 67  | 47  | 1 | 19 | 219 | 78 | 143 | 9.00E-05 | 36.6 |
| TcMYB64 | ATMYB90   | 40    | 105 | 61  | 2 | 31 | 339 | 10 | 113 | 2.00E-21 | 85.5 |
| TcMYB64 | AtMYB22   | 27.46 | 193 | 139 | 4 | 19 | 594 | 50 | 227 | 2.00E-21 | 85.5 |
| TcMYB64 | AtMYB124  | 34    | 100 | 66  | 0 | 40 | 339 | 28 | 127 | 2.00E-20 | 85.1 |
| TcMYB64 | AtMYB124  | 31.82 | 66  | 45  | 1 | 19 | 216 | 73 | 137 | 7.00E-06 | 40   |
| TcMYB64 | ATMYB91   | 35.58 | 104 | 64  | 1 | 40 | 342 | 7  | 110 | 5.00E-18 | 77.4 |
| TcMYB65 | AtMYB62   | 69.09 | 110 | 34  | 0 | 7  | 336 | 13 | 122 | 2.00E-60 | 184  |
| TcMYB65 | ATMYB71   | 48.11 | 185 | 94  | 1 | 16 | 564 | 15 | 199 | 3.00E-60 | 184  |
| TcMYB65 | AtMYB116  | 66.97 | 109 | 36  | 0 | 10 | 336 | 13 | 121 | 1.00E-57 | 177  |
| TcMYB65 | AtMYB112  | 69.81 | 106 | 32  | 0 | 16 | 333 | 29 | 134 | 1.00E-57 | 176  |
| TcMYB65 | AtMYB108  | 67.59 | 108 | 35  | 0 | 10 | 333 | 14 | 121 | 5.00E-57 | 177  |
| TcMYB65 | ATMYB59-3 | 55.71 | 140 | 57  | 1 | 16 | 420 | 5  | 144 | 2.00E-56 | 173  |
| TcMYB65 | ATMYB3    | 66.98 | 106 | 35  | 0 | 16 | 333 | 17 | 122 | 4.00E-56 | 172  |
| TcMYB65 | ATMYB48   | 61.42 | 127 | 45  | 1 | 13 | 381 | 3  | 129 | 5.00E-56 | 172  |
| TcMYB65 | AtMYB79   | 51.28 | 156 | 76  | 1 | 16 | 483 | 3  | 149 | 2.00E-55 | 171  |

|         |          |       |     |     |   |    |     |    |     |          |     |
|---------|----------|-------|-----|-----|---|----|-----|----|-----|----------|-----|
| TcMYB65 | AtMYB24  | 66.04 | 106 | 36  | 0 | 16 | 333 | 14 | 119 | 2.00E-55 | 169 |
| TcMYB65 | ATMYB57  | 48.8  | 166 | 82  | 1 | 7  | 495 | 19 | 184 | 7.00E-55 | 168 |
| TcMYB65 | ATMYB121 | 62.5  | 120 | 43  | 1 | 1  | 354 | 17 | 136 | 1.00E-54 | 169 |
| TcMYB65 | ATMYB2   | 62.39 | 109 | 41  | 0 | 10 | 336 | 15 | 123 | 2.00E-54 | 169 |
| TcMYB65 | ATMYB78  | 60.66 | 122 | 34  | 1 | 10 | 333 | 21 | 142 | 2.00E-53 | 167 |
| TcMYB65 | AtMYB20  | 42.86 | 182 | 103 | 3 | 25 | 567 | 12 | 183 | 5.00E-49 | 155 |
| TcMYB65 | AtMYB85  | 61.74 | 115 | 43  | 1 | 25 | 366 | 12 | 126 | 7.00E-49 | 154 |
| TcMYB65 | ATMYB3   | 55.8  | 138 | 60  | 1 | 13 | 423 | 8  | 145 | 8.00E-49 | 154 |
| TcMYB65 | MYB8     | 60.5  | 119 | 46  | 1 | 13 | 366 | 8  | 126 | 9.00E-49 | 152 |
| TcMYB65 | MYB7     | 63.03 | 119 | 43  | 1 | 13 | 366 | 8  | 126 | 2.00E-48 | 153 |
| TcMYB65 | AtMYB27  | 59.65 | 114 | 46  | 0 | 10 | 351 | 4  | 117 | 4.00E-48 | 152 |
| TcMYB65 | ATMYB4   | 63.03 | 119 | 43  | 1 | 13 | 366 | 8  | 126 | 6.00E-48 | 152 |
| TcMYB65 | AtMYB42  | 65.38 | 104 | 36  | 0 | 25 | 336 | 12 | 115 | 7.00E-48 | 152 |
| TcMYB65 | AtMYB40  | 40.17 | 229 | 105 | 7 | 25 | 615 | 12 | 232 | 1.00E-47 | 151 |
| TcMYB65 | AtMYB6   | 55.63 | 142 | 58  | 3 | 13 | 423 | 8  | 149 | 2.00E-47 | 150 |
| TcMYB65 | AtMYB43  | 50.7  | 142 | 69  | 2 | 25 | 447 | 12 | 150 | 4.00E-47 | 152 |
| TcMYB65 | AtMYB32  | 47.56 | 164 | 81  | 3 | 13 | 489 | 8  | 168 | 4.00E-47 | 150 |
| TcMYB65 | AtMYB107 | 61.11 | 108 | 42  | 0 | 13 | 336 | 8  | 115 | 6.00E-47 | 151 |
| TcMYB65 | ATMYB12  | 62.73 | 110 | 41  | 0 | 13 | 342 | 8  | 117 | 7.00E-47 | 152 |
| TcMYB65 | ATMYB14  | 60.91 | 110 | 43  | 0 | 13 | 342 | 8  | 117 | 8.00E-47 | 149 |
| TcMYB65 | ATMYB13  | 45.24 | 168 | 92  | 2 | 13 | 516 | 8  | 166 | 3.00E-46 | 147 |
| TcMYB65 | AtMYB49  | 62.04 | 108 | 41  | 0 | 13 | 336 | 8  | 115 | 3.00E-46 | 149 |
| TcMYB65 | AtMYB41  | 57.5  | 120 | 50  | 1 | 13 | 369 | 8  | 127 | 4.00E-46 | 148 |
| TcMYB65 | ATMYB66  | 42.51 | 167 | 96  | 1 | 7  | 507 | 10 | 174 | 7.00E-46 | 145 |
| TcMYB65 | ATMYB5   | 40.57 | 212 | 119 | 5 | 25 | 639 | 23 | 227 | 9.00E-46 | 146 |
| TcMYB65 | ATMYB101 | 43.26 | 178 | 95  | 3 | 13 | 528 | 14 | 186 | 2.00E-45 | 151 |
| TcMYB65 | ATMYB11  | 60.91 | 110 | 43  | 0 | 13 | 342 | 8  | 117 | 4.00E-45 | 147 |
| TcMYB65 | ATMYB63  | 37.81 | 201 | 125 | 3 | 13 | 615 | 10 | 201 | 5.00E-45 | 145 |
| TcMYB65 | ATMYB61  | 50.34 | 145 | 71  | 2 | 16 | 447 | 9  | 145 | 7.00E-45 | 147 |
| TcMYB65 | AtMYB9   | 59.26 | 108 | 44  | 0 | 13 | 336 | 8  | 115 | 1.00E-44 | 145 |
| TcMYB65 | ATMYB92  | 41.88 | 191 | 106 | 3 | 13 | 570 | 8  | 188 | 1.00E-44 | 145 |
| TcMYB65 | ATMYB99  | 56.35 | 126 | 47  | 2 | 13 | 366 | 9  | 134 | 2.00E-44 | 142 |
| TcMYB65 | ATMYB86  | 57.63 | 118 | 49  | 1 | 16 | 366 | 9  | 126 | 2.00E-44 | 145 |
| TcMYB65 | AtMYB74  | 55.37 | 121 | 53  | 1 | 10 | 369 | 8  | 128 | 2.00E-44 | 144 |
| TcMYB65 | ATMYB23  | 53.98 | 113 | 52  | 0 | 13 | 351 | 8  | 120 | 3.00E-44 | 141 |
| TcMYB65 | AtMYB83  | 58.47 | 118 | 47  | 1 | 22 | 369 | 29 | 146 | 3.00E-44 | 144 |
| TcMYB65 | ATMYB46  | 61.32 | 106 | 41  | 0 | 19 | 336 | 16 | 121 | 4.00E-44 | 142 |
| TcMYB65 | ATMYB72  | 42.78 | 180 | 89  | 4 | 13 | 510 | 10 | 185 | 6.00E-44 | 142 |
| TcMYB65 | ATMYB111 | 60.36 | 111 | 44  | 0 | 13 | 345 | 8  | 118 | 7.00E-44 | 144 |
| TcMYB65 | AtMYB50  | 55.74 | 122 | 53  | 1 | 16 | 378 | 9  | 130 | 7.00E-44 | 143 |
| TcMYB65 | ATMYB102 | 57.5  | 120 | 50  | 1 | 13 | 369 | 8  | 127 | 8.00E-44 | 144 |
| TcMYB65 | ATMYB58  | 54.05 | 111 | 51  | 0 | 13 | 345 | 10 | 120 | 1.00E-43 | 141 |
| TcMYB65 | AtMYB103 | 52.99 | 117 | 55  | 1 | 16 | 366 | 9  | 122 | 2.00E-43 | 143 |
| TcMYB65 | AtMYB97  | 61.17 | 103 | 40  | 0 | 25 | 333 | 19 | 121 | 2.00E-43 | 143 |
| TcMYB65 | ATMYB67  | 44.83 | 145 | 79  | 3 | 16 | 447 | 19 | 157 | 3.00E-43 | 141 |
| TcMYB65 | ATMYB106 | 41.28 | 172 | 91  | 2 | 25 | 510 | 55 | 226 | 3.00E-43 | 143 |
| TcMYB65 | ATMYB30  | 53.45 | 116 | 54  | 0 | 25 | 372 | 12 | 127 | 5.00E-43 | 141 |
| TcMYB65 | AtMYB53  | 53.78 | 119 | 54  | 1 | 13 | 366 | 8  | 126 | 5.00E-43 | 140 |
| TcMYB65 | ATMYB96  | 40.56 | 180 | 107 | 2 | 13 | 552 | 8  | 170 | 6.00E-43 | 141 |
| TcMYB65 | AtMYB51  | 59.62 | 104 | 42  | 0 | 25 | 336 | 13 | 116 | 6.00E-43 | 141 |
| TcMYB65 | AtMYB60  | 58.49 | 106 | 44  | 0 | 25 | 342 | 12 | 117 | 7.00E-43 | 139 |
| TcMYB65 | ATMYB123 | 59.43 | 106 | 43  | 0 | 19 | 336 | 12 | 117 | 8.00E-43 | 139 |
| TcMYB65 | ATMYB35  | 38.38 | 185 | 112 | 2 | 13 | 561 | 8  | 192 | 8.00E-43 | 140 |
| TcMYB65 | ATMYB34  | 56.48 | 108 | 47  | 0 | 13 | 336 | 8  | 115 | 9.00E-43 | 139 |
| TcMYB65 | ATMYB120 | 59.26 | 108 | 44  | 0 | 25 | 348 | 26 | 133 | 1.00E-42 | 144 |
| TcMYB65 | AtMYB82  | 48.36 | 122 | 63  | 0 | 7  | 372 | 6  | 127 | 3.00E-42 | 135 |
| TcMYB65 | AtMYB17  | 57.39 | 115 | 48  | 1 | 25 | 366 | 12 | 126 | 3.00E-42 | 138 |
| TcMYB65 | ATMYB94  | 55.96 | 109 | 48  | 0 | 25 | 351 | 12 | 120 | 3.00E-42 | 139 |
| TcMYB65 | ATMYB26  | 50.79 | 126 | 53  | 1 | 16 | 366 | 9  | 134 | 3.00E-42 | 140 |
| TcMYB65 | ATMYB33  | 56.48 | 108 | 47  | 0 | 25 | 348 | 32 | 139 | 4.00E-42 | 142 |
| TcMYB65 | AtMYB10  | 48.84 | 129 | 60  | 1 | 13 | 381 | 10 | 138 | 4.00E-42 | 136 |
| TcMYB65 | ATMYB0   | 52.73 | 110 | 52  | 0 | 7  | 336 | 8  | 117 | 5.00E-42 | 135 |
| TcMYB65 | ATMYB95  | 53.33 | 120 | 55  | 1 | 25 | 381 | 12 | 131 | 6.00E-42 | 137 |
| TcMYB65 | ATMYB122 | 43.68 | 174 | 97  | 4 | 19 | 537 | 10 | 170 | 6.00E-42 | 138 |
| TcMYB65 | ATMYB80  | 49.22 | 128 | 64  | 1 | 13 | 393 | 8  | 135 | 7.00E-42 | 138 |
| TcMYB65 | ATMYB29  | 45.33 | 150 | 78  | 3 | 19 | 456 | 10 | 159 | 7.00E-42 | 138 |
| TcMYB65 | ATMYB65  | 54.63 | 108 | 49  | 0 | 25 | 348 | 41 | 148 | 7.00E-42 | 142 |
| TcMYB65 | ATMYB31  | 56.48 | 108 | 47  | 0 | 13 | 336 | 8  | 115 | 8.00E-42 | 138 |
| TcMYB65 | AtMYB93  | 56.48 | 108 | 47  | 0 | 13 | 336 | 8  | 115 | 9.00E-42 | 139 |
| TcMYB65 | ATMYB16  | 58.65 | 104 | 43  | 0 | 25 | 336 | 12 | 115 | 1.00E-41 | 137 |
| TcMYB65 | ATMYB15  | 57.41 | 108 | 46  | 0 | 13 | 336 | 8  | 115 | 2.00E-41 | 135 |
| TcMYB65 | AtMYB76  | 48.41 | 126 | 64  | 1 | 19 | 393 | 10 | 135 | 4.00E-41 | 136 |
| TcMYB65 | AtMYB19  | 52.25 | 111 | 53  | 0 | 7  | 339 | 6  | 116 | 8.00E-41 | 134 |
| TcMYB65 | AtMYB81  | 55.66 | 106 | 47  | 0 | 16 | 333 | 17 | 122 | 2.00E-40 | 136 |
| TcMYB65 | ATMYB28  | 45.07 | 142 | 74  | 3 | 19 | 432 | 10 | 151 | 3.00E-40 | 135 |
| TcMYB65 | ATMYB55  | 42.46 | 179 | 77  | 5 | 16 | 474 | 9  | 185 | 2.00E-39 | 132 |
| TcMYB65 | AtMYB18  | 42.77 | 173 | 96  | 4 | 19 | 528 | 8  | 175 | 3.00E-39 | 130 |
| TcMYB65 | AtMYB45  | 51.85 | 108 | 52  | 0 | 10 | 333 | 13 | 120 | 4.00E-39 | 129 |
| TcMYB65 | ATMYB37  | 41.33 | 150 | 87  | 2 | 13 | 459 | 8  | 153 | 4.00E-38 | 128 |
| TcMYB65 | ATMYB38  | 47.9  | 119 | 61  | 1 | 13 | 366 | 8  | 126 | 1.00E-37 | 126 |

|         |          |       |     |     |   |    |     |     |     |          |      |
|---------|----------|-------|-----|-----|---|----|-----|-----|-----|----------|------|
| TcMYB65 | AtMYB36  | 37.57 | 173 | 105 | 3 | 13 | 522 | 8   | 177 | 1.00E-37 | 127  |
| TcMYB65 | ATMYB87  | 42.14 | 159 | 91  | 3 | 25 | 498 | 12  | 158 | 1.00E-37 | 126  |
| TcMYB65 | ATMYB84  | 47.54 | 122 | 63  | 1 | 13 | 375 | 8   | 129 | 2.00E-37 | 126  |
| TcMYB65 | AtMYB47  | 49.57 | 115 | 57  | 1 | 25 | 366 | 12  | 126 | 6.00E-37 | 124  |
| TcMYB65 | ATMYB68  | 51.38 | 109 | 52  | 1 | 13 | 336 | 8   | 116 | 1.00E-36 | 125  |
| TcMYB65 | AtMYB114 | 48.18 | 110 | 57  | 0 | 7  | 336 | 2   | 111 | 7.00E-35 | 114  |
| TcMYB65 | ATMYB75  | 48.18 | 110 | 57  | 0 | 7  | 336 | 2   | 111 | 5.00E-34 | 115  |
| TcMYB65 | ATMYB90  | 38.01 | 171 | 106 | 2 | 7  | 519 | 2   | 158 | 5.00E-34 | 115  |
| TcMYB65 | AtMYB113 | 49.04 | 104 | 53  | 0 | 25 | 336 | 8   | 111 | 2.00E-33 | 114  |
| TcMYB65 | ATMYB119 | 34.78 | 161 | 91  | 5 | 7  | 447 | 97  | 255 | 7.00E-30 | 108  |
| TcMYB65 | ATMYB25  | 48.04 | 102 | 53  | 1 | 31 | 336 | 50  | 150 | 2.00E-29 | 105  |
| TcMYB65 | AtMYB70  | 45.28 | 106 | 58  | 1 | 31 | 348 | 13  | 117 | 5.00E-29 | 103  |
| TcMYB65 | ATMYB77  | 42.45 | 106 | 61  | 1 | 31 | 348 | 6   | 110 | 7.00E-29 | 103  |
| TcMYB65 | AtMYB64  | 42.34 | 111 | 63  | 2 | 7  | 336 | 97  | 205 | 1.00E-28 | 104  |
| TcMYB65 | AtMYB109 | 38.36 | 146 | 84  | 4 | 31 | 450 | 56  | 199 | 2.00E-28 | 103  |
| TcMYB65 | AtMYB1   | 47.57 | 103 | 54  | 1 | 31 | 339 | 55  | 156 | 2.00E-28 | 103  |
| TcMYB65 | AtMYB98  | 32.95 | 173 | 109 | 3 | 7  | 504 | 209 | 379 | 6.00E-28 | 102  |
| TcMYB65 | AtMYB104 | 43.56 | 101 | 57  | 0 | 31 | 333 | 18  | 118 | 1.00E-27 | 101  |
| TcMYB65 | ATMYB73  | 44.12 | 102 | 57  | 1 | 31 | 336 | 13  | 113 | 2.00E-27 | 99.8 |
| TcMYB65 | ATMYB118 | 44.44 | 108 | 60  | 1 | 13 | 336 | 183 | 289 | 2.00E-27 | 101  |
| TcMYB65 | ATMYB105 | 43.4  | 106 | 59  | 2 | 25 | 339 | 105 | 208 | 2.00E-26 | 97.4 |
| TcMYB65 | AtMYB117 | 43.27 | 104 | 58  | 2 | 31 | 339 | 98  | 199 | 4.00E-26 | 97.1 |
| TcMYB65 | ATMYB44  | 42.16 | 102 | 59  | 1 | 31 | 336 | 6   | 106 | 5.00E-26 | 95.9 |
| TcMYB65 | ATMYB54  | 42.73 | 110 | 62  | 2 | 31 | 357 | 6   | 113 | 4.00E-25 | 92.4 |
| TcMYB65 | ATMYB52  | 44.66 | 103 | 56  | 2 | 31 | 336 | 5   | 105 | 1.00E-24 | 91.3 |
| TcMYB65 | AtMYB100 | 39.09 | 110 | 67  | 1 | 13 | 342 | 20  | 128 | 2.00E-24 | 90.5 |
| TcMYB65 | AtMYB115 | 38.89 | 108 | 66  | 1 | 10 | 333 | 151 | 257 | 3.00E-24 | 92   |
| TcMYB65 | AtMYB89  | 37.29 | 118 | 71  | 2 | 7  | 351 | 48  | 164 | 3.00E-24 | 88.6 |
| TcMYB65 | ATMYB110 | 38.24 | 102 | 63  | 1 | 31 | 336 | 67  | 167 | 1.00E-23 | 89.7 |
| TcMYB65 | ATMYB69  | 37.84 | 111 | 69  | 1 | 4  | 336 | 10  | 119 | 2.00E-23 | 88.2 |
| TcMYB65 | AtMYB56  | 37.84 | 111 | 69  | 1 | 31 | 363 | 93  | 202 | 2.00E-23 | 89.4 |
| TcMYB65 | AtMYB124 | 40.4  | 99  | 59  | 1 | 40 | 336 | 28  | 125 | 1.00E-21 | 85.1 |
| TcMYB65 | ATMYB91  | 39.36 | 94  | 55  | 1 | 40 | 315 | 7   | 100 | 6.00E-21 | 82.8 |
| TcMYB65 | ATMYB88  | 39.39 | 99  | 60  | 1 | 40 | 336 | 33  | 130 | 1.00E-20 | 82.8 |
| TcMYB65 | AtMYB22  | 34.21 | 114 | 75  | 2 | 13 | 354 | 48  | 159 | 5.00E-20 | 79   |
| TcMYB66 | ATMYB13  | 72.03 | 118 | 33  | 0 | 1  | 354 | 1   | 118 | 6.00E-65 | 194  |
| TcMYB66 | ATMYB14  | 71.79 | 117 | 33  | 0 | 1  | 351 | 1   | 117 | 2.00E-64 | 193  |
| TcMYB66 | AtMYB107 | 70.69 | 116 | 34  | 0 | 1  | 348 | 1   | 116 | 3.00E-64 | 195  |
| TcMYB66 | ATMYB16  | 71.55 | 116 | 33  | 0 | 1  | 348 | 1   | 116 | 9.00E-64 | 194  |
| TcMYB66 | ATMYB15  | 58.55 | 152 | 53  | 1 | 1  | 426 | 1   | 152 | 1.00E-63 | 192  |
| TcMYB66 | ATMYB58  | 69.42 | 121 | 37  | 0 | 4  | 366 | 4   | 124 | 2.00E-63 | 191  |
| TcMYB66 | ATMYB63  | 49.74 | 193 | 90  | 3 | 4  | 561 | 4   | 188 | 3.00E-63 | 192  |
| TcMYB66 | AtMYB17  | 66.93 | 127 | 42  | 0 | 1  | 381 | 1   | 127 | 7.00E-63 | 191  |
| TcMYB66 | ATMYB94  | 48.48 | 198 | 92  | 3 | 1  | 564 | 1   | 198 | 1.00E-62 | 191  |
| TcMYB66 | AtMYB9   | 70.69 | 116 | 34  | 0 | 1  | 348 | 1   | 116 | 1.00E-62 | 191  |
| TcMYB66 | AtMYB41  | 68.1  | 116 | 37  | 0 | 1  | 348 | 1   | 116 | 1.00E-61 | 187  |
| TcMYB66 | ATMYB72  | 69.57 | 115 | 35  | 0 | 4  | 348 | 4   | 118 | 8.00E-61 | 186  |
| TcMYB66 | ATMYB106 | 70.8  | 113 | 33  | 0 | 10 | 348 | 47  | 159 | 8.00E-61 | 188  |
| TcMYB66 | ATMYB102 | 67.24 | 116 | 38  | 0 | 1  | 348 | 1   | 116 | 1.00E-60 | 187  |
| TcMYB66 | AtMYB60  | 60.14 | 138 | 55  | 0 | 1  | 414 | 1   | 138 | 1.00E-60 | 184  |
| TcMYB66 | ATMYB30  | 45.85 | 205 | 107 | 3 | 1  | 603 | 1   | 205 | 2.00E-60 | 186  |
| TcMYB66 | ATMYB96  | 52    | 175 | 80  | 3 | 1  | 513 | 1   | 174 | 2.00E-60 | 186  |
| TcMYB66 | AtMYB93  | 68.97 | 116 | 36  | 0 | 1  | 348 | 1   | 116 | 1.00E-59 | 184  |
| TcMYB66 | AtMYB10  | 71.05 | 114 | 33  | 0 | 7  | 348 | 5   | 118 | 3.00E-59 | 180  |
| TcMYB66 | AtMYB74  | 66.67 | 117 | 38  | 1 | 1  | 348 | 1   | 117 | 5.00E-59 | 182  |
| TcMYB66 | MYB8     | 64.41 | 118 | 42  | 0 | 1  | 354 | 1   | 118 | 2.00E-57 | 174  |
| TcMYB66 | AtMYB85  | 57.14 | 147 | 58  | 1 | 1  | 426 | 1   | 147 | 4.00E-57 | 175  |
| TcMYB66 | AtMYB42  | 49.44 | 180 | 88  | 2 | 1  | 531 | 1   | 176 | 7.00E-57 | 175  |
| TcMYB66 | ATMYB92  | 66.38 | 116 | 39  | 0 | 1  | 348 | 1   | 116 | 9.00E-57 | 176  |
| TcMYB66 | AtMYB53  | 66.38 | 116 | 39  | 0 | 1  | 348 | 1   | 116 | 1.00E-56 | 175  |
| TcMYB66 | AtMYB43  | 65.55 | 119 | 41  | 0 | 1  | 357 | 1   | 119 | 1.00E-56 | 176  |
| TcMYB66 | ATMYB31  | 55.63 | 151 | 67  | 2 | 1  | 453 | 1   | 145 | 2.00E-56 | 176  |
| TcMYB66 | AtMYB6   | 64.66 | 116 | 41  | 0 | 1  | 348 | 1   | 116 | 2.00E-56 | 172  |
| TcMYB66 | AtMYB20  | 63.87 | 119 | 43  | 0 | 1  | 357 | 1   | 119 | 2.00E-56 | 174  |
| TcMYB66 | ATMYB3   | 64.66 | 116 | 41  | 0 | 1  | 348 | 1   | 116 | 3.00E-56 | 172  |
| TcMYB66 | MYB7     | 62.93 | 116 | 43  | 0 | 1  | 348 | 1   | 116 | 9.00E-56 | 172  |
| TcMYB66 | ATMYB4   | 62.71 | 118 | 44  | 0 | 1  | 354 | 1   | 118 | 1.00E-55 | 172  |
| TcMYB66 | AtMYB32  | 63.79 | 116 | 42  | 0 | 1  | 348 | 1   | 116 | 1.00E-55 | 172  |
| TcMYB66 | ATMYB12  | 47.03 | 185 | 95  | 1 | 1  | 546 | 1   | 185 | 2.00E-55 | 174  |
| TcMYB66 | ATMYB80  | 61.34 | 119 | 46  | 0 | 1  | 357 | 1   | 119 | 1.00E-54 | 170  |
| TcMYB66 | AtMYB49  | 62.93 | 116 | 43  | 0 | 1  | 348 | 1   | 116 | 2.00E-54 | 170  |
| TcMYB66 | AtMYB36  | 52.12 | 165 | 71  | 2 | 1  | 471 | 1   | 165 | 2.00E-54 | 170  |
| TcMYB66 | ATMYB35  | 49.7  | 165 | 73  | 1 | 1  | 465 | 1   | 165 | 4.00E-54 | 169  |
| TcMYB66 | ATMYB34  | 63.79 | 116 | 42  | 0 | 1  | 348 | 1   | 116 | 4.00E-54 | 168  |
| TcMYB66 | ATMYB111 | 64.04 | 114 | 41  | 0 | 1  | 342 | 1   | 114 | 5.00E-54 | 169  |
| TcMYB66 | ATMYB11  | 62.6  | 123 | 46  | 0 | 1  | 369 | 1   | 123 | 5.00E-54 | 169  |
| TcMYB66 | ATMYB5   | 63.39 | 112 | 41  | 0 | 13 | 348 | 16  | 127 | 1.00E-53 | 166  |
| TcMYB66 | ATMYB122 | 62.07 | 116 | 44  | 0 | 1  | 348 | 1   | 116 | 2.00E-53 | 168  |
| TcMYB66 | ATMYB87  | 66.67 | 117 | 38  | 1 | 1  | 348 | 1   | 117 | 3.00E-53 | 166  |
| TcMYB66 | AtMYB40  | 54.17 | 144 | 66  | 1 | 1  | 432 | 1   | 139 | 6.00E-53 | 164  |

|         |           |       |     |     |   |     |     |     |     |          |      |
|---------|-----------|-------|-----|-----|---|-----|-----|-----|-----|----------|------|
| TcMYB66 | ATMYB84   | 65.55 | 119 | 40  | 1 | 1   | 354 | 1   | 119 | 1.00E-52 | 165  |
| TcMYB66 | ATMYB29   | 54.68 | 139 | 58  | 1 | 1   | 402 | 1   | 139 | 1.00E-52 | 166  |
| TcMYB66 | AtMYB50   | 45.88 | 194 | 90  | 4 | 1   | 537 | 1   | 194 | 2.00E-52 | 164  |
| TcMYB66 | ATMYB68   | 49.43 | 174 | 87  | 3 | 1   | 519 | 1   | 170 | 2.00E-52 | 166  |
| TcMYB66 | ATMYB37   | 63.25 | 117 | 42  | 1 | 1   | 348 | 1   | 117 | 3.00E-52 | 164  |
| TcMYB66 | AtMYB51   | 61.54 | 117 | 44  | 1 | 1   | 348 | 1   | 117 | 6.00E-52 | 164  |
| TcMYB66 | ATMYB61   | 62.93 | 116 | 43  | 0 | 1   | 348 | 1   | 116 | 2.00E-51 | 163  |
| TcMYB66 | ATMYB99   | 60.66 | 122 | 41  | 1 | 4   | 348 | 3   | 124 | 4.00E-51 | 159  |
| TcMYB66 | ATMYB38   | 64.1  | 117 | 41  | 1 | 1   | 348 | 1   | 117 | 5.00E-51 | 160  |
| TcMYB66 | ATMYB86   | 62.93 | 116 | 43  | 0 | 1   | 348 | 1   | 116 | 9.00E-51 | 161  |
| TcMYB66 | ATMYB55   | 59.38 | 128 | 40  | 1 | 1   | 348 | 1   | 128 | 1.00E-50 | 161  |
| TcMYB66 | ATMYB28   | 60.34 | 116 | 46  | 0 | 1   | 348 | 1   | 116 | 2.00E-50 | 161  |
| TcMYB66 | AtMYB103  | 60.53 | 114 | 45  | 0 | 1   | 342 | 1   | 114 | 7.00E-50 | 159  |
| TcMYB66 | ATMYB26   | 57.6  | 125 | 44  | 1 | 1   | 348 | 1   | 125 | 1.00E-49 | 159  |
| TcMYB66 | ATMYB95   | 61.21 | 116 | 45  | 0 | 1   | 348 | 1   | 116 | 2.00E-49 | 155  |
| TcMYB66 | ATMYB67   | 60.36 | 111 | 44  | 0 | 16  | 348 | 16  | 126 | 4.00E-49 | 156  |
| TcMYB66 | AtMYB76   | 58.62 | 116 | 48  | 0 | 1   | 348 | 1   | 116 | 5.00E-49 | 156  |
| TcMYB66 | AtMYB47   | 58.97 | 117 | 48  | 0 | 1   | 351 | 1   | 117 | 1.00E-47 | 151  |
| TcMYB66 | AtMYB79   | 50.34 | 149 | 72  | 2 | 37  | 477 | 7   | 145 | 6.00E-46 | 146  |
| TcMYB66 | ATMYB101  | 61.54 | 104 | 40  | 0 | 31  | 342 | 17  | 120 | 8.00E-46 | 151  |
| TcMYB66 | ATMYB71   | 41.8  | 189 | 110 | 1 | 31  | 597 | 17  | 195 | 1.00E-45 | 146  |
| TcMYB66 | AtMYB81   | 49.26 | 136 | 68  | 1 | 25  | 429 | 17  | 152 | 1.00E-45 | 150  |
| TcMYB66 | AtMYB97   | 54.62 | 119 | 53  | 1 | 34  | 387 | 19  | 137 | 2.00E-45 | 148  |
| TcMYB66 | AtMYB108  | 60.75 | 107 | 42  | 0 | 22  | 342 | 15  | 121 | 3.00E-45 | 146  |
| TcMYB66 | ATMYB120  | 61.9  | 105 | 40  | 0 | 34  | 348 | 26  | 130 | 5.00E-45 | 150  |
| TcMYB66 | ATMYB123  | 50.38 | 133 | 65  | 1 | 34  | 429 | 14  | 146 | 9.00E-45 | 143  |
| TcMYB66 | AtMYB83   | 59.46 | 111 | 45  | 0 | 22  | 354 | 26  | 136 | 2.00E-44 | 145  |
| TcMYB66 | ATMYB33   | 59.81 | 107 | 43  | 0 | 22  | 342 | 28  | 134 | 2.00E-44 | 148  |
| TcMYB66 | AtMYB45   | 59.8  | 102 | 41  | 0 | 37  | 342 | 19  | 120 | 5.00E-44 | 141  |
| TcMYB66 | ATMYB46   | 47.68 | 151 | 73  | 1 | 34  | 468 | 18  | 168 | 6.00E-44 | 142  |
| TcMYB66 | AtMYB112  | 60.19 | 103 | 41  | 0 | 34  | 342 | 32  | 134 | 9.00E-44 | 140  |
| TcMYB66 | ATMYB3    | 47.95 | 146 | 74  | 2 | 34  | 465 | 20  | 164 | 2.00E-43 | 139  |
| TcMYB66 | ATMYB66   | 56.73 | 104 | 45  | 0 | 37  | 348 | 17  | 120 | 2.00E-43 | 138  |
| TcMYB66 | AtMYB24   | 59.22 | 103 | 42  | 0 | 34  | 342 | 17  | 119 | 3.00E-43 | 138  |
| TcMYB66 | ATMYB65   | 49.62 | 133 | 67  | 1 | 34  | 432 | 41  | 171 | 7.00E-43 | 144  |
| TcMYB66 | ATMYB23   | 56.73 | 104 | 45  | 0 | 37  | 348 | 13  | 116 | 7.00E-43 | 137  |
| TcMYB66 | AtMYB114  | 55.77 | 104 | 46  | 0 | 31  | 342 | 7   | 110 | 1.00E-42 | 134  |
| TcMYB66 | AtMYB19   | 59.8  | 102 | 41  | 0 | 37  | 342 | 13  | 114 | 3.00E-42 | 137  |
| TcMYB66 | AtMYB62   | 36.57 | 216 | 123 | 4 | 34  | 639 | 19  | 223 | 4.00E-42 | 137  |
| TcMYB66 | ATMYB2    | 56.31 | 103 | 45  | 0 | 34  | 342 | 20  | 122 | 1.00E-41 | 135  |
| TcMYB66 | AtMYB18   | 58.82 | 102 | 42  | 0 | 37  | 342 | 11  | 112 | 2.00E-41 | 135  |
| TcMYB66 | AtMYB116  | 54.24 | 118 | 52  | 1 | 37  | 384 | 19  | 136 | 2.00E-41 | 135  |
| TcMYB66 | ATMYB57   | 56.31 | 103 | 45  | 0 | 34  | 342 | 25  | 127 | 2.00E-41 | 133  |
| TcMYB66 | ATMYB0    | 45.39 | 141 | 75  | 1 | 37  | 453 | 15  | 155 | 3.00E-41 | 133  |
| TcMYB66 | AtMYB82   | 50.91 | 110 | 54  | 0 | 25  | 354 | 9   | 118 | 8.00E-41 | 131  |
| TcMYB66 | ATMYB121  | 55.66 | 106 | 47  | 0 | 25  | 342 | 24  | 129 | 1.00E-40 | 133  |
| TcMYB66 | ATMYB75   | 54.81 | 104 | 47  | 0 | 31  | 342 | 7   | 110 | 3.00E-40 | 131  |
| TcMYB66 | ATMYB90   | 54.81 | 104 | 47  | 0 | 31  | 342 | 7   | 110 | 3.00E-40 | 131  |
| TcMYB66 | AtMYB113  | 51.75 | 114 | 55  | 1 | 1   | 342 | 1   | 110 | 1.00E-39 | 129  |
| TcMYB66 | ATMYB78   | 50.41 | 121 | 46  | 1 | 22  | 342 | 22  | 142 | 2.00E-39 | 131  |
| TcMYB66 | ATMYB59-3 | 43.45 | 145 | 80  | 1 | 37  | 465 | 9   | 153 | 3.00E-38 | 125  |
| TcMYB66 | AtMYB27   | 54.37 | 103 | 47  | 0 | 34  | 342 | 9   | 111 | 6.00E-37 | 122  |
| TcMYB66 | ATMYB48   | 52.88 | 104 | 49  | 0 | 31  | 342 | 6   | 109 | 2.00E-36 | 122  |
| TcMYB66 | AtMYB104  | 47.57 | 103 | 54  | 0 | 25  | 333 | 13  | 115 | 2.00E-31 | 111  |
| TcMYB66 | ATMYB119  | 45.54 | 101 | 55  | 1 | 40  | 342 | 105 | 204 | 1.00E-29 | 107  |
| TcMYB66 | ATMYB77   | 48.31 | 118 | 58  | 3 | 40  | 384 | 6   | 122 | 2.00E-29 | 104  |
| TcMYB66 | AtMYB1    | 51.43 | 105 | 47  | 2 | 40  | 342 | 55  | 154 | 3.00E-29 | 105  |
| TcMYB66 | AtMYB70   | 50.5  | 101 | 50  | 1 | 40  | 342 | 13  | 112 | 1.00E-28 | 102  |
| TcMYB66 | AtMYB98   | 43.4  | 106 | 60  | 1 | 25  | 342 | 212 | 316 | 1.00E-28 | 104  |
| TcMYB66 | AtMYB98   | 23.49 | 149 | 113 | 4 | 169 | 612 | 207 | 342 | 1.00E-06 | 40.8 |
| TcMYB66 | AtMYB115  | 37.14 | 140 | 87  | 2 | 34  | 450 | 156 | 293 | 2.00E-28 | 102  |
| TcMYB66 | ATMYB44   | 48.51 | 101 | 52  | 1 | 40  | 342 | 6   | 105 | 4.00E-28 | 101  |
| TcMYB66 | AtMYB109  | 45.11 | 133 | 62  | 3 | 40  | 405 | 56  | 186 | 7.00E-28 | 102  |
| TcMYB66 | ATMYB73   | 48.51 | 101 | 52  | 1 | 40  | 342 | 13  | 112 | 1.00E-27 | 100  |
| TcMYB66 | AtMYB64   | 41.75 | 103 | 60  | 1 | 34  | 342 | 103 | 204 | 2.00E-27 | 101  |
| TcMYB66 | ATMYB118  | 36.77 | 155 | 86  | 4 | 25  | 453 | 184 | 336 | 3.00E-27 | 100  |
| TcMYB66 | ATMYB52   | 46    | 100 | 54  | 1 | 28  | 327 | 1   | 99  | 1.00E-26 | 95.9 |
| TcMYB66 | ATMYB54   | 46.88 | 96  | 51  | 1 | 40  | 327 | 6   | 100 | 4.00E-26 | 94.7 |
| TcMYB66 | ATMYB25   | 34.62 | 182 | 115 | 4 | 40  | 573 | 50  | 206 | 5.00E-26 | 96.7 |
| TcMYB66 | ATMYB105  | 44.55 | 101 | 56  | 1 | 25  | 327 | 102 | 201 | 8.00E-26 | 95.5 |
| TcMYB66 | AtMYB117  | 45.83 | 96  | 52  | 1 | 40  | 327 | 98  | 192 | 3.00E-24 | 91.7 |
| TcMYB66 | ATMYB69   | 43.88 | 98  | 55  | 1 | 25  | 318 | 14  | 110 | 6.00E-24 | 89   |
| TcMYB66 | ATMYB91   | 35.25 | 139 | 87  | 3 | 49  | 456 | 7   | 143 | 1.00E-22 | 87   |
| TcMYB66 | AtMYB56   | 42.71 | 96  | 55  | 1 | 40  | 327 | 93  | 187 | 3.00E-22 | 85.5 |
| TcMYB66 | AtMYB100  | 36.7  | 109 | 69  | 1 | 25  | 351 | 21  | 128 | 7.00E-22 | 83.2 |
| TcMYB66 | ATMYB110  | 40.78 | 103 | 59  | 2 | 40  | 342 | 67  | 166 | 4.00E-21 | 82.4 |
| TcMYB66 | AtMYB89   | 35.29 | 102 | 66  | 1 | 43  | 348 | 57  | 157 | 1.00E-19 | 76.3 |
| TcMYB66 | AtMYB22   | 30.15 | 136 | 95  | 2 | 25  | 432 | 49  | 180 | 3.00E-19 | 76.6 |
| TcMYB66 | AtMYB124  | 38.78 | 98  | 60  | 1 | 49  | 342 | 28  | 124 | 8.00E-18 | 73.9 |
| TcMYB66 | ATMYB88   | 37.76 | 98  | 61  | 1 | 49  | 342 | 33  | 129 | 2.00E-17 | 72.8 |

|         |          |       |     |     |   |    |     |    |     |          |     |
|---------|----------|-------|-----|-----|---|----|-----|----|-----|----------|-----|
| TcMYB67 | ATMYB86  | 51.67 | 209 | 98  | 4 | 13 | 630 | 5  | 206 | 4.00E-64 | 197 |
| TcMYB67 | AtMYB50  | 61.44 | 153 | 59  | 2 | 13 | 471 | 5  | 151 | 3.00E-62 | 191 |
| TcMYB67 | ATMYB61  | 50.52 | 194 | 80  | 3 | 13 | 546 | 5  | 195 | 6.00E-61 | 189 |
| TcMYB67 | ATMYB67  | 48.69 | 191 | 98  | 3 | 16 | 588 | 16 | 189 | 2.00E-58 | 181 |
| TcMYB67 | ATMYB55  | 67.42 | 132 | 31  | 2 | 13 | 372 | 5  | 135 | 2.00E-56 | 177 |
| TcMYB67 | AtMYB103 | 68.14 | 113 | 36  | 1 | 13 | 351 | 5  | 116 | 3.00E-55 | 175 |
| TcMYB67 | AtMYB85  | 62.9  | 124 | 46  | 1 | 16 | 387 | 6  | 128 | 4.00E-55 | 171 |
| TcMYB67 | AtMYB42  | 62.9  | 124 | 46  | 1 | 16 | 387 | 6  | 128 | 6.00E-54 | 169 |
| TcMYB67 | AtMYB32  | 57.25 | 131 | 56  | 1 | 16 | 408 | 6  | 135 | 8.00E-54 | 168 |
| TcMYB67 | AtMYB6   | 58.33 | 132 | 54  | 2 | 16 | 408 | 6  | 136 | 1.00E-53 | 167 |
| TcMYB67 | ATMYB106 | 41.35 | 237 | 119 | 4 | 1  | 651 | 44 | 279 | 1.00E-53 | 171 |
| TcMYB67 | ATMYB80  | 62.1  | 124 | 47  | 1 | 16 | 387 | 6  | 128 | 4.00E-53 | 168 |
| TcMYB67 | ATMYB4   | 58.02 | 131 | 55  | 1 | 16 | 408 | 6  | 135 | 4.00E-53 | 167 |
| TcMYB67 | ATMYB92  | 54.19 | 155 | 65  | 3 | 37 | 483 | 13 | 166 | 6.00E-53 | 168 |
| TcMYB67 | ATMYB3   | 43.78 | 201 | 112 | 3 | 16 | 615 | 6  | 199 | 8.00E-53 | 165 |
| TcMYB67 | AtMYB20  | 62.1  | 124 | 47  | 1 | 16 | 387 | 6  | 128 | 8.00E-53 | 166 |
| TcMYB67 | AtMYB93  | 61.07 | 131 | 51  | 1 | 16 | 408 | 6  | 135 | 9.00E-53 | 168 |
| TcMYB67 | ATMYB26  | 65.85 | 123 | 33  | 2 | 13 | 354 | 5  | 126 | 9.00E-53 | 168 |
| TcMYB67 | AtMYB43  | 61.07 | 131 | 51  | 1 | 16 | 408 | 6  | 135 | 9.00E-53 | 167 |
| TcMYB67 | ATMYB102 | 62.1  | 124 | 47  | 1 | 16 | 387 | 6  | 128 | 2.00E-52 | 167 |
| TcMYB67 | ATMYB46  | 67.24 | 116 | 38  | 1 | 4  | 351 | 8  | 122 | 3.00E-52 | 164 |
| TcMYB67 | MYB7     | 52.05 | 146 | 70  | 1 | 16 | 453 | 6  | 150 | 3.00E-52 | 164 |
| TcMYB67 | ATMYB16  | 58.78 | 131 | 54  | 1 | 16 | 408 | 6  | 135 | 4.00E-52 | 166 |
| TcMYB67 | AtMYB53  | 65.81 | 117 | 40  | 1 | 37 | 387 | 13 | 128 | 1.00E-51 | 164 |
| TcMYB67 | AtMYB107 | 60.48 | 124 | 49  | 1 | 16 | 387 | 6  | 128 | 1.00E-51 | 164 |
| TcMYB67 | AtMYB74  | 60    | 125 | 49  | 2 | 16 | 387 | 6  | 129 | 2.00E-51 | 164 |
| TcMYB67 | ATMYB5   | 56.3  | 135 | 59  | 2 | 16 | 420 | 17 | 147 | 8.00E-51 | 160 |
| TcMYB67 | AtMYB17  | 59.68 | 124 | 50  | 1 | 16 | 387 | 6  | 128 | 2.00E-50 | 160 |
| TcMYB67 | MYB8     | 58.82 | 119 | 49  | 1 | 16 | 372 | 6  | 123 | 2.00E-50 | 158 |
| TcMYB67 | AtMYB9   | 60.48 | 124 | 49  | 1 | 16 | 387 | 6  | 128 | 2.00E-50 | 161 |
| TcMYB67 | ATMYB35  | 58.87 | 124 | 51  | 1 | 16 | 387 | 6  | 128 | 7.00E-50 | 159 |
| TcMYB67 | AtMYB83  | 65.22 | 115 | 40  | 1 | 7  | 351 | 21 | 134 | 1.00E-49 | 159 |
| TcMYB67 | AtMYB49  | 60    | 125 | 50  | 1 | 13 | 387 | 5  | 128 | 1.00E-49 | 159 |
| TcMYB67 | AtMYB41  | 58.06 | 124 | 52  | 1 | 16 | 387 | 6  | 128 | 2.00E-49 | 157 |
| TcMYB67 | ATMYB99  | 47.16 | 176 | 87  | 2 | 10 | 519 | 5  | 178 | 2.00E-49 | 156 |
| TcMYB67 | AtMYB10  | 50    | 160 | 78  | 3 | 16 | 489 | 8  | 157 | 4.00E-49 | 155 |
| TcMYB67 | ATMYB72  | 65.18 | 112 | 39  | 1 | 16 | 351 | 8  | 118 | 2.00E-48 | 155 |
| TcMYB67 | ATMYB111 | 55.26 | 152 | 60  | 4 | 16 | 447 | 6  | 156 | 4.00E-48 | 155 |
| TcMYB67 | AtMYB19  | 62.96 | 108 | 40  | 1 | 25 | 348 | 9  | 115 | 5.00E-48 | 153 |
| TcMYB67 | AtMYB40  | 47.4  | 173 | 87  | 4 | 10 | 516 | 4  | 173 | 6.00E-48 | 153 |
| TcMYB67 | ATMYB12  | 55    | 140 | 63  | 2 | 16 | 435 | 6  | 139 | 1.00E-47 | 155 |
| TcMYB67 | ATMYB29  | 56.35 | 126 | 55  | 1 | 10 | 387 | 4  | 128 | 2.00E-47 | 154 |
| TcMYB67 | ATMYB11  | 58.06 | 124 | 52  | 2 | 16 | 387 | 6  | 123 | 2.00E-47 | 154 |
| TcMYB67 | AtMYB76  | 40.47 | 215 | 127 | 4 | 10 | 651 | 4  | 201 | 3.00E-47 | 153 |
| TcMYB67 | ATMYB95  | 60.66 | 122 | 48  | 1 | 37 | 402 | 13 | 133 | 3.00E-47 | 151 |
| TcMYB67 | ATMYB58  | 63.39 | 112 | 41  | 1 | 16 | 351 | 8  | 118 | 4.00E-47 | 151 |
| TcMYB67 | ATMYB37  | 60.17 | 118 | 47  | 0 | 16 | 369 | 6  | 123 | 6.00E-47 | 152 |
| TcMYB67 | ATMYB28  | 54.96 | 131 | 59  | 1 | 10 | 402 | 4  | 133 | 7.00E-47 | 153 |
| TcMYB67 | ATMYB34  | 53.79 | 132 | 61  | 1 | 1  | 396 | 1  | 131 | 1.00E-46 | 150 |
| TcMYB67 | ATMYB84  | 60.18 | 113 | 45  | 0 | 16 | 354 | 6  | 118 | 2.00E-46 | 150 |
| TcMYB67 | ATMYB68  | 59.29 | 113 | 46  | 0 | 16 | 354 | 6  | 118 | 5.00E-46 | 151 |
| TcMYB67 | AtMYB51  | 57.6  | 125 | 52  | 2 | 1  | 372 | 1  | 124 | 6.00E-46 | 150 |
| TcMYB67 | ATMYB123 | 64.55 | 110 | 39  | 1 | 22 | 351 | 10 | 118 | 6.00E-46 | 147 |
| TcMYB67 | ATMYB13  | 61.4  | 114 | 44  | 1 | 10 | 351 | 4  | 116 | 6.00E-46 | 147 |
| TcMYB67 | ATMYB14  | 44.39 | 187 | 104 | 5 | 16 | 576 | 6  | 169 | 1.00E-45 | 146 |
| TcMYB67 | ATMYB38  | 60.18 | 113 | 45  | 0 | 16 | 354 | 6  | 118 | 2.00E-45 | 147 |
| TcMYB67 | AtMYB18  | 39.11 | 248 | 144 | 9 | 28 | 750 | 8  | 238 | 3.00E-45 | 146 |
| TcMYB67 | AtMYB36  | 58.41 | 113 | 47  | 0 | 16 | 354 | 6  | 118 | 6.00E-45 | 147 |
| TcMYB67 | ATMYB63  | 61.61 | 112 | 43  | 1 | 16 | 351 | 8  | 118 | 6.00E-45 | 146 |
| TcMYB67 | AtMYB45  | 58.04 | 112 | 47  | 1 | 10 | 345 | 10 | 120 | 7.00E-45 | 145 |
| TcMYB67 | ATMYB122 | 35.84 | 279 | 157 | 6 | 1  | 771 | 1  | 278 | 1.00E-44 | 146 |
| TcMYB67 | ATMYB15  | 36.71 | 237 | 148 | 6 | 16 | 720 | 6  | 217 | 4.00E-44 | 144 |
| TcMYB67 | AtMYB47  | 59.32 | 118 | 47  | 2 | 37 | 387 | 13 | 128 | 5.00E-44 | 143 |
| TcMYB67 | ATMYB23  | 55.45 | 110 | 49  | 1 | 22 | 351 | 8  | 116 | 6.00E-43 | 139 |
| TcMYB67 | AtMYB82  | 59.62 | 104 | 42  | 1 | 37 | 348 | 13 | 115 | 1.00E-42 | 137 |
| TcMYB67 | ATMYB31  | 46.41 | 153 | 82  | 2 | 16 | 474 | 6  | 154 | 2.00E-42 | 140 |
| TcMYB67 | ATMYB66  | 57.14 | 105 | 45  | 1 | 37 | 351 | 17 | 120 | 2.00E-42 | 137 |
| TcMYB67 | AtMYB79  | 61.54 | 104 | 40  | 1 | 37 | 348 | 7  | 109 | 1.00E-41 | 137 |
| TcMYB67 | ATMYB121 | 58.33 | 108 | 45  | 1 | 22 | 345 | 23 | 129 | 1.00E-41 | 137 |
| TcMYB67 | ATMYB87  | 54.87 | 113 | 51  | 0 | 16 | 354 | 6  | 118 | 1.00E-41 | 138 |
| TcMYB67 | ATMYB71  | 61.54 | 104 | 40  | 1 | 37 | 348 | 19 | 121 | 2.00E-41 | 136 |
| TcMYB67 | ATMYB94  | 51.15 | 131 | 64  | 2 | 16 | 408 | 6  | 126 | 2.00E-41 | 138 |
| TcMYB67 | AtMYB108 | 62.14 | 103 | 39  | 1 | 37 | 345 | 20 | 121 | 4.00E-41 | 137 |
| TcMYB67 | ATMYB96  | 50.7  | 142 | 70  | 3 | 16 | 441 | 6  | 139 | 6.00E-41 | 137 |
| TcMYB67 | ATMYB30  | 50    | 136 | 68  | 1 | 1  | 408 | 1  | 135 | 6.00E-41 | 136 |
| TcMYB67 | ATMYB0   | 52.25 | 111 | 53  | 1 | 22 | 354 | 10 | 119 | 6.00E-41 | 134 |
| TcMYB67 | AtMYB60  | 51.15 | 131 | 64  | 1 | 16 | 408 | 6  | 135 | 9.00E-40 | 132 |
| TcMYB67 | AtMYB112 | 59.22 | 103 | 42  | 1 | 37 | 345 | 33 | 134 | 2.00E-39 | 130 |
| TcMYB67 | AtMYB24  | 57.8  | 109 | 46  | 1 | 37 | 363 | 18 | 125 | 4.00E-39 | 129 |
| TcMYB67 | ATMYB3   | 42.86 | 175 | 100 | 4 | 37 | 561 | 21 | 177 | 1.00E-38 | 128 |

|         |           |       |     |     |   |    |     |     |     |          |      |
|---------|-----------|-------|-----|-----|---|----|-----|-----|-----|----------|------|
| TcMYB67 | AtMYB116  | 40.24 | 169 | 101 | 3 | 7  | 513 | 9   | 161 | 3.00E-38 | 128  |
| TcMYB67 | ATMYB57   | 55.24 | 105 | 47  | 1 | 37 | 351 | 26  | 129 | 9.00E-38 | 125  |
| TcMYB67 | ATMYB65   | 51.75 | 114 | 55  | 1 | 7  | 348 | 32  | 144 | 5.00E-37 | 130  |
| TcMYB67 | ATMYB33   | 53.51 | 114 | 53  | 1 | 7  | 348 | 23  | 135 | 7.00E-37 | 129  |
| TcMYB67 | AtMYB62   | 49.14 | 116 | 59  | 1 | 22 | 369 | 15  | 129 | 1.00E-36 | 124  |
| TcMYB67 | AtMYB114  | 52.88 | 104 | 49  | 1 | 37 | 348 | 9   | 111 | 2.00E-36 | 119  |
| TcMYB67 | ATMYB59-3 | 50.93 | 108 | 53  | 1 | 25 | 348 | 5   | 111 | 4.00E-36 | 121  |
| TcMYB67 | ATMYB48   | 50.46 | 109 | 54  | 1 | 22 | 348 | 3   | 110 | 5.00E-36 | 122  |
| TcMYB67 | ATMYB101  | 53.85 | 104 | 48  | 1 | 37 | 348 | 19  | 121 | 7.00E-36 | 126  |
| TcMYB67 | ATMYB120  | 55.24 | 105 | 47  | 1 | 37 | 351 | 27  | 130 | 9.00E-36 | 126  |
| TcMYB67 | AtMYB27   | 40.23 | 174 | 99  | 4 | 22 | 528 | 5   | 169 | 3.00E-35 | 119  |
| TcMYB67 | ATMYB75   | 52.88 | 104 | 49  | 1 | 37 | 348 | 9   | 111 | 3.00E-35 | 119  |
| TcMYB67 | AtMYB81   | 54.9  | 102 | 46  | 1 | 40 | 345 | 22  | 122 | 1.00E-34 | 122  |
| TcMYB67 | ATMYB90   | 52.88 | 104 | 49  | 1 | 37 | 348 | 9   | 111 | 2.00E-34 | 117  |
| TcMYB67 | AtMYB97   | 52.43 | 103 | 49  | 1 | 37 | 345 | 20  | 121 | 1.00E-33 | 119  |
| TcMYB67 | AtMYB113  | 50.96 | 104 | 51  | 1 | 37 | 348 | 9   | 111 | 1.00E-33 | 115  |
| TcMYB67 | ATMYB78   | 47.54 | 122 | 50  | 2 | 22 | 345 | 22  | 142 | 2.00E-33 | 116  |
| TcMYB67 | ATMYB2    | 48.08 | 104 | 54  | 1 | 37 | 348 | 21  | 123 | 5.00E-33 | 114  |
| TcMYB67 | AtMYB104  | 50.53 | 95  | 47  | 1 | 49 | 333 | 21  | 114 | 6.00E-30 | 108  |
| TcMYB67 | ATMYB105  | 44.19 | 129 | 70  | 3 | 4  | 384 | 93  | 217 | 7.00E-27 | 99.4 |
| TcMYB67 | AtMYB1    | 36.56 | 186 | 117 | 6 | 40 | 594 | 55  | 215 | 8.00E-27 | 100  |
| TcMYB67 | ATMYB25   | 50    | 104 | 51  | 3 | 40 | 348 | 50  | 150 | 6.00E-26 | 97.4 |
| TcMYB67 | ATMYB73   | 50    | 104 | 51  | 3 | 40 | 348 | 13  | 113 | 6.00E-26 | 96.7 |
| TcMYB67 | AtMYB64   | 41.03 | 117 | 66  | 2 | 7  | 348 | 91  | 205 | 1.00E-25 | 97.1 |
| TcMYB67 | AtMYB70   | 49.04 | 104 | 52  | 3 | 40 | 348 | 13  | 113 | 1.00E-25 | 95.5 |
| TcMYB67 | ATMYB119  | 42.72 | 103 | 59  | 1 | 40 | 348 | 105 | 205 | 4.00E-25 | 95.9 |
| TcMYB67 | AtMYB109  | 50    | 104 | 51  | 3 | 40 | 348 | 56  | 156 | 4.00E-25 | 95.5 |
| TcMYB67 | ATMYB44   | 47.12 | 104 | 54  | 3 | 40 | 348 | 6   | 106 | 5.00E-25 | 94   |
| TcMYB67 | ATMYB54   | 48.98 | 98  | 49  | 3 | 40 | 330 | 6   | 100 | 6.00E-25 | 92.4 |
| TcMYB67 | AtMYB117  | 45.63 | 103 | 56  | 1 | 40 | 348 | 98  | 198 | 1.00E-24 | 93.6 |
| TcMYB67 | ATMYB118  | 44.23 | 104 | 57  | 3 | 40 | 348 | 189 | 289 | 7.00E-24 | 92.4 |
| TcMYB67 | ATMYB52   | 31.12 | 196 | 124 | 5 | 40 | 594 | 5   | 192 | 7.00E-24 | 89.7 |
| TcMYB67 | AtMYB56   | 47.42 | 97  | 51  | 2 | 40 | 330 | 93  | 187 | 9.00E-24 | 90.9 |
| TcMYB67 | ATMYB77   | 46.15 | 104 | 55  | 3 | 40 | 348 | 6   | 106 | 1.00E-23 | 90.1 |
| TcMYB67 | AtMYB115  | 42.86 | 98  | 56  | 2 | 40 | 333 | 158 | 253 | 9.00E-23 | 88.6 |
| TcMYB67 | ATMYB110  | 38.71 | 124 | 76  | 2 | 40 | 411 | 67  | 187 | 1.00E-22 | 87.4 |
| TcMYB67 | AtMYB98   | 38.46 | 117 | 72  | 2 | 40 | 390 | 217 | 331 | 2.00E-22 | 88.2 |
| TcMYB67 | AtMYB100  | 46.32 | 95  | 51  | 2 | 49 | 333 | 29  | 121 | 4.00E-22 | 84.7 |
| TcMYB67 | ATMYB69   | 42.42 | 99  | 56  | 3 | 37 | 330 | 18  | 113 | 3.00E-19 | 77.4 |
| TcMYB67 | AtMYB89   | 35.65 | 115 | 71  | 3 | 10 | 345 | 43  | 155 | 2.00E-17 | 70.9 |
| TcMYB67 | AtMYB22   | 38.54 | 96  | 58  | 3 | 49 | 333 | 57  | 148 | 1.00E-16 | 70.1 |
| TcMYB67 | ATMYB88   | 37    | 100 | 63  | 2 | 49 | 348 | 33  | 130 | 3.00E-16 | 70.5 |
| TcMYB67 | ATMYB91   | 33.96 | 106 | 68  | 2 | 37 | 348 | 3   | 107 | 9.00E-16 | 68.6 |
| TcMYB67 | AtMYB124  | 36    | 100 | 64  | 2 | 49 | 348 | 28  | 125 | 4.00E-15 | 67   |
| TcMYB68 | ATMYB105  | 69.23 | 130 | 40  | 1 | 70 | 459 | 100 | 225 | 2.00E-62 | 191  |
| TcMYB68 | ATMYB52   | 75.89 | 112 | 27  | 1 | 91 | 426 | 5   | 112 | 2.00E-62 | 188  |
| TcMYB68 | AtMYB117  | 68.66 | 134 | 40  | 2 | 91 | 486 | 98  | 227 | 9.00E-62 | 190  |
| TcMYB68 | ATMYB54   | 72.97 | 111 | 30  | 1 | 91 | 423 | 6   | 112 | 3.00E-59 | 180  |
| TcMYB68 | ATMYB69   | 49.73 | 183 | 88  | 5 | 22 | 558 | 2   | 167 | 3.00E-56 | 173  |
| TcMYB68 | AtMYB56   | 71.17 | 111 | 32  | 1 | 91 | 423 | 93  | 199 | 1.00E-54 | 171  |
| TcMYB68 | ATMYB110  | 61.42 | 127 | 49  | 1 | 58 | 438 | 56  | 178 | 2.00E-52 | 164  |
| TcMYB68 | AtMYB89   | 52.03 | 123 | 59  | 2 | 52 | 420 | 46  | 161 | 3.00E-40 | 130  |
| TcMYB68 | AtMYB109  | 50.89 | 112 | 55  | 1 | 79 | 414 | 52  | 159 | 1.00E-38 | 131  |
| TcMYB68 | AtMYB1    | 51.82 | 110 | 53  | 1 | 79 | 408 | 51  | 156 | 2.00E-37 | 127  |
| TcMYB68 | ATMYB25   | 49.56 | 113 | 57  | 1 | 88 | 426 | 49  | 157 | 4.00E-36 | 124  |
| TcMYB68 | ATMYB73   | 50    | 106 | 53  | 1 | 88 | 405 | 12  | 113 | 2.00E-35 | 121  |
| TcMYB68 | ATMYB44   | 51.89 | 106 | 51  | 1 | 88 | 405 | 5   | 106 | 2.00E-35 | 120  |
| TcMYB68 | AtMYB70   | 49.06 | 106 | 54  | 1 | 88 | 405 | 12  | 113 | 3.00E-35 | 120  |
| TcMYB68 | ATMYB77   | 49.06 | 106 | 54  | 1 | 88 | 405 | 5   | 106 | 1.00E-33 | 116  |
| TcMYB68 | ATMYB119  | 47.15 | 123 | 65  | 2 | 76 | 444 | 100 | 215 | 4.00E-33 | 117  |
| TcMYB68 | ATMYB80   | 37.82 | 156 | 95  | 3 | 67 | 528 | 6   | 158 | 1.00E-31 | 111  |
| TcMYB68 | AtMYB64   | 45.83 | 120 | 65  | 2 | 79 | 438 | 101 | 213 | 2.00E-30 | 109  |
| TcMYB68 | ATMYB23   | 45.05 | 111 | 61  | 2 | 73 | 405 | 8   | 115 | 2.00E-30 | 105  |
| TcMYB68 | ATMYB67   | 43.41 | 129 | 73  | 3 | 19 | 405 | 3   | 125 | 3.00E-30 | 107  |
| TcMYB68 | AtMYB10   | 42.37 | 118 | 68  | 2 | 67 | 420 | 8   | 122 | 7.00E-30 | 104  |
| TcMYB68 | ATMYB66   | 44.55 | 110 | 61  | 2 | 76 | 405 | 13  | 119 | 1.00E-29 | 103  |
| TcMYB68 | ATMYB0    | 44.14 | 111 | 62  | 2 | 73 | 405 | 10  | 117 | 3.00E-29 | 102  |
| TcMYB68 | AtMYB49   | 45.69 | 116 | 63  | 2 | 58 | 405 | 3   | 115 | 3.00E-29 | 104  |
| TcMYB68 | AtMYB81   | 42.11 | 133 | 77  | 2 | 70 | 468 | 15  | 144 | 3.00E-29 | 106  |
| TcMYB68 | AtMYB51   | 43.36 | 113 | 64  | 2 | 67 | 405 | 7   | 116 | 5.00E-29 | 104  |
| TcMYB68 | ATMYB72   | 42.37 | 118 | 68  | 2 | 67 | 420 | 8   | 122 | 8.00E-29 | 103  |
| TcMYB68 | AtMYB53   | 44.64 | 112 | 62  | 2 | 70 | 405 | 7   | 115 | 1.00E-28 | 103  |
| TcMYB68 | MYB8      | 39.32 | 117 | 71  | 1 | 67 | 417 | 6   | 119 | 2.00E-28 | 100  |
| TcMYB68 | ATMYB63   | 33.33 | 186 | 124 | 4 | 67 | 624 | 8   | 170 | 3.00E-28 | 101  |
| TcMYB68 | AtMYB41   | 43.36 | 113 | 64  | 2 | 67 | 405 | 6   | 115 | 3.00E-28 | 101  |
| TcMYB68 | ATMYB118  | 40.68 | 118 | 70  | 1 | 70 | 423 | 182 | 295 | 3.00E-28 | 103  |
| TcMYB68 | ATMYB15   | 41.38 | 116 | 68  | 2 | 67 | 414 | 6   | 118 | 5.00E-28 | 100  |
| TcMYB68 | ATMYB3    | 41.88 | 117 | 68  | 2 | 67 | 417 | 6   | 119 | 6.00E-28 | 100  |
| TcMYB68 | AtMYB107  | 43.36 | 113 | 64  | 2 | 67 | 405 | 6   | 115 | 9.00E-28 | 100  |
| TcMYB68 | AtMYB103  | 39.69 | 131 | 79  | 3 | 49 | 441 | 3   | 127 | 9.00E-28 | 101  |

|         |           |       |     |     |   |    |     |     |     |          |      |
|---------|-----------|-------|-----|-----|---|----|-----|-----|-----|----------|------|
| TcMYB68 | ATMYB122  | 43.93 | 107 | 60  | 2 | 67 | 387 | 6   | 109 | 1.00E-27 | 100  |
| TcMYB68 | ATMYB4    | 42.74 | 117 | 67  | 2 | 67 | 417 | 6   | 119 | 2.00E-27 | 99   |
| TcMYB68 | AtMYB45   | 48.48 | 99  | 51  | 1 | 91 | 387 | 20  | 115 | 3.00E-27 | 98.2 |
| TcMYB68 | AtMYB115  | 40.54 | 111 | 66  | 1 | 91 | 423 | 158 | 264 | 4.00E-27 | 99.8 |
| TcMYB68 | ATMYB92   | 44.64 | 112 | 62  | 2 | 70 | 405 | 7   | 115 | 4.00E-27 | 99.4 |
| TcMYB68 | AtMYB9    | 42.48 | 113 | 65  | 2 | 67 | 405 | 6   | 115 | 4.00E-27 | 99.4 |
| TcMYB68 | AtMYB18   | 43.4  | 106 | 60  | 1 | 91 | 408 | 12  | 114 | 5.00E-27 | 98.2 |
| TcMYB68 | AtMYB98   | 35.29 | 136 | 88  | 2 | 10 | 417 | 193 | 321 | 8.00E-27 | 99.8 |
| TcMYB68 | ATMYB101  | 43.7  | 119 | 67  | 2 | 73 | 429 | 14  | 129 | 8.00E-27 | 100  |
| TcMYB68 | AtMYB74   | 43.86 | 114 | 63  | 3 | 67 | 405 | 6   | 116 | 9.00E-27 | 98.2 |
| TcMYB68 | ATMYB86   | 39.17 | 120 | 73  | 2 | 58 | 417 | 3   | 119 | 1.00E-26 | 98.6 |
| TcMYB68 | MYB7      | 39.82 | 113 | 68  | 1 | 67 | 405 | 6   | 115 | 1.00E-26 | 97.1 |
| TcMYB68 | ATMYB34   | 38.46 | 117 | 72  | 2 | 67 | 417 | 6   | 119 | 1.00E-26 | 97.4 |
| TcMYB68 | ATMYB35   | 42.48 | 113 | 65  | 2 | 67 | 405 | 6   | 115 | 1.00E-26 | 97.8 |
| TcMYB68 | ATMYB33   | 36.43 | 140 | 83  | 2 | 28 | 429 | 7   | 143 | 1.00E-26 | 99.8 |
| TcMYB68 | AtMYB6    | 41.59 | 113 | 66  | 2 | 67 | 405 | 6   | 115 | 1.00E-26 | 95.9 |
| TcMYB68 | AtMYB60   | 34.42 | 154 | 101 | 3 | 67 | 528 | 6   | 153 | 2.00E-26 | 96.7 |
| TcMYB68 | AtMYB40   | 39.83 | 118 | 71  | 2 | 58 | 411 | 3   | 117 | 2.00E-26 | 96.3 |
| TcMYB68 | ATMYB102  | 41.88 | 117 | 68  | 2 | 55 | 405 | 2   | 115 | 2.00E-26 | 97.8 |
| TcMYB68 | AtMYB27   | 33.78 | 148 | 98  | 2 | 91 | 534 | 11  | 153 | 2.00E-26 | 95.5 |
| TcMYB68 | AtMYB19   | 40.57 | 106 | 63  | 1 | 91 | 408 | 14  | 116 | 4.00E-26 | 95.5 |
| TcMYB68 | ATMYB106  | 39.82 | 113 | 68  | 2 | 67 | 405 | 49  | 158 | 4.00E-26 | 97.4 |
| TcMYB68 | ATMYB61   | 39.17 | 120 | 73  | 2 | 58 | 417 | 3   | 119 | 4.00E-26 | 97.1 |
| TcMYB68 | ATMYB28   | 28.42 | 190 | 134 | 5 | 55 | 618 | 2   | 181 | 4.00E-26 | 97.1 |
| TcMYB68 | AtMYB104  | 35.77 | 123 | 79  | 2 | 55 | 423 | 6   | 122 | 5.00E-26 | 97.1 |
| TcMYB68 | AtMYB82   | 42.2  | 109 | 63  | 1 | 91 | 417 | 14  | 119 | 5.00E-26 | 93.6 |
| TcMYB68 | AtMYB32   | 36.62 | 142 | 90  | 3 | 67 | 492 | 6   | 140 | 6.00E-26 | 95.1 |
| TcMYB68 | AtMYB17   | 35.06 | 174 | 108 | 6 | 67 | 573 | 6   | 171 | 6.00E-26 | 95.5 |
| TcMYB68 | ATMYB13   | 42.48 | 113 | 65  | 2 | 67 | 405 | 6   | 115 | 7.00E-26 | 94.4 |
| TcMYB68 | ATMYB14   | 37.31 | 134 | 84  | 2 | 67 | 468 | 6   | 136 | 7.00E-26 | 94.4 |
| TcMYB68 | ATMYB95   | 42.2  | 109 | 63  | 2 | 91 | 417 | 14  | 119 | 8.00E-26 | 94.7 |
| TcMYB68 | AtMYB97   | 41.59 | 113 | 66  | 1 | 91 | 429 | 21  | 130 | 1.00E-25 | 96.3 |
| TcMYB68 | AtMYB93   | 40.71 | 113 | 67  | 2 | 67 | 405 | 6   | 115 | 1.00E-25 | 95.9 |
| TcMYB68 | AtMYB50   | 37.5  | 120 | 75  | 2 | 58 | 417 | 3   | 119 | 1.00E-25 | 95.1 |
| TcMYB68 | ATMYB48   | 38.76 | 129 | 79  | 2 | 91 | 477 | 9   | 134 | 2.00E-25 | 93.6 |
| TcMYB68 | ATMYB94   | 39.66 | 116 | 70  | 1 | 67 | 414 | 6   | 118 | 2.00E-25 | 94.7 |
| TcMYB68 | ATMYB120  | 43.36 | 113 | 64  | 2 | 91 | 429 | 28  | 137 | 2.00E-25 | 96.3 |
| TcMYB68 | ATMYB58   | 37.5  | 120 | 75  | 2 | 67 | 426 | 8   | 124 | 2.00E-25 | 93.6 |
| TcMYB68 | ATMYB96   | 39.66 | 116 | 70  | 1 | 67 | 414 | 6   | 118 | 2.00E-25 | 94.7 |
| TcMYB68 | ATMYB16   | 38.94 | 113 | 69  | 2 | 67 | 405 | 6   | 115 | 2.00E-25 | 94.4 |
| TcMYB68 | ATMYB65   | 38.94 | 113 | 69  | 1 | 91 | 429 | 43  | 152 | 3.00E-25 | 95.9 |
| TcMYB68 | ATMYB121  | 35.77 | 137 | 88  | 2 | 34 | 444 | 10  | 143 | 3.00E-25 | 93.2 |
| TcMYB68 | ATMYB31   | 39.82 | 113 | 68  | 1 | 67 | 405 | 6   | 115 | 4.00E-25 | 94   |
| TcMYB68 | AtMYB100  | 41.67 | 108 | 62  | 3 | 97 | 417 | 28  | 130 | 4.00E-25 | 92   |
| TcMYB68 | ATMYB26   | 37.6  | 125 | 72  | 2 | 49 | 405 | 3   | 124 | 4.00E-25 | 94.4 |
| TcMYB68 | ATMYB59-3 | 40.71 | 113 | 67  | 2 | 85 | 423 | 8   | 117 | 6.00E-25 | 91.7 |
| TcMYB68 | ATMYB30   | 37.93 | 116 | 72  | 1 | 67 | 414 | 6   | 118 | 6.00E-25 | 93.2 |
| TcMYB68 | ATMYB5    | 38.05 | 113 | 70  | 1 | 67 | 405 | 17  | 126 | 7.00E-25 | 91.7 |
| TcMYB68 | ATMYB29   | 39.64 | 111 | 67  | 2 | 55 | 387 | 2   | 109 | 8.00E-25 | 93.2 |
| TcMYB68 | ATMYB111  | 31.79 | 173 | 118 | 3 | 67 | 585 | 6   | 168 | 8.00E-25 | 93.2 |
| TcMYB68 | AtMYB36   | 32.12 | 165 | 111 | 4 | 67 | 558 | 6   | 150 | 1.00E-24 | 92.8 |
| TcMYB68 | AtMYB47   | 39.45 | 109 | 66  | 2 | 91 | 417 | 14  | 119 | 1.00E-24 | 91.7 |
| TcMYB68 | ATMYB123  | 39.66 | 116 | 70  | 2 | 91 | 438 | 16  | 128 | 1.00E-24 | 91.3 |
| TcMYB68 | AtMYB76   | 41.9  | 105 | 61  | 2 | 91 | 405 | 14  | 115 | 2.00E-24 | 92   |
| TcMYB68 | AtMYB79   | 40.8  | 125 | 74  | 3 | 91 | 465 | 8   | 128 | 3.00E-24 | 90.1 |
| TcMYB68 | ATMYB2    | 40.17 | 117 | 70  | 2 | 34 | 384 | 8   | 116 | 4.00E-24 | 90.1 |
| TcMYB68 | ATMYB55   | 35.11 | 131 | 74  | 2 | 58 | 417 | 3   | 131 | 4.00E-24 | 91.3 |
| TcMYB68 | AtMYB43   | 37.82 | 119 | 74  | 2 | 58 | 414 | 3   | 118 | 7.00E-24 | 90.5 |
| TcMYB68 | ATMYB46   | 39.09 | 110 | 67  | 2 | 91 | 420 | 20  | 126 | 9.00E-24 | 89.4 |
| TcMYB68 | AtMYB62   | 40    | 115 | 69  | 2 | 70 | 414 | 14  | 125 | 1.00E-23 | 89.4 |
| TcMYB68 | AtMYB114  | 39.09 | 110 | 67  | 2 | 76 | 405 | 5   | 111 | 1.00E-23 | 85.5 |
| TcMYB68 | AtMYB83   | 34.11 | 129 | 85  | 1 | 34 | 420 | 13  | 138 | 1.00E-23 | 89.7 |
| TcMYB68 | AtMYB20   | 36.97 | 119 | 75  | 2 | 58 | 414 | 3   | 118 | 2.00E-23 | 88.6 |
| TcMYB68 | AtMYB116  | 36.51 | 126 | 77  | 2 | 46 | 414 | 2   | 124 | 3.00E-23 | 88.2 |
| TcMYB68 | ATMYB84   | 37.5  | 120 | 74  | 3 | 67 | 423 | 6   | 122 | 4.00E-23 | 88.2 |
| TcMYB68 | ATMYB75   | 36.89 | 122 | 77  | 2 | 76 | 441 | 5   | 123 | 4.00E-23 | 87   |
| TcMYB68 | ATMYB71   | 38.4  | 125 | 77  | 3 | 91 | 465 | 20  | 140 | 6.00E-23 | 87   |
| TcMYB68 | ATMYB12   | 38.94 | 113 | 69  | 2 | 67 | 405 | 6   | 115 | 1.00E-22 | 87.8 |
| TcMYB68 | AtMYB42   | 37.93 | 116 | 72  | 2 | 58 | 405 | 3   | 115 | 1.00E-22 | 86.7 |
| TcMYB68 | ATMYB68   | 35.83 | 120 | 76  | 2 | 67 | 423 | 6   | 122 | 2.00E-22 | 87   |
| TcMYB68 | AtMYB22   | 32.59 | 135 | 90  | 3 | 1  | 402 | 23  | 152 | 2.00E-22 | 85.1 |
| TcMYB68 | ATMYB37   | 36.44 | 118 | 75  | 2 | 67 | 420 | 6   | 121 | 2.00E-22 | 86.3 |
| TcMYB68 | AtMYB85   | 37.93 | 116 | 72  | 2 | 58 | 405 | 3   | 115 | 3.00E-22 | 85.1 |
| TcMYB68 | AtMYB108  | 38.32 | 107 | 66  | 1 | 64 | 384 | 12  | 115 | 4.00E-22 | 85.5 |
| TcMYB68 | ATMYB38   | 37.72 | 114 | 70  | 2 | 67 | 405 | 6   | 116 | 4.00E-22 | 85.1 |
| TcMYB68 | ATMYB87   | 28.57 | 189 | 129 | 6 | 67 | 615 | 6   | 183 | 6.00E-22 | 84.7 |
| TcMYB68 | AtMYB112  | 41.84 | 98  | 57  | 1 | 91 | 384 | 34  | 128 | 7.00E-22 | 83.6 |
| TcMYB68 | ATMYB57   | 37.27 | 110 | 69  | 1 | 91 | 420 | 27  | 133 | 2.00E-21 | 81.6 |
| TcMYB68 | ATMYB11   | 37.17 | 113 | 71  | 2 | 67 | 405 | 6   | 115 | 3.00E-21 | 83.6 |
| TcMYB68 | ATMYB90   | 35.88 | 131 | 84  | 3 | 76 | 468 | 5   | 131 | 4.00E-21 | 81.6 |

|         |           |       |     |     |   |    |     |     |     |          |      |
|---------|-----------|-------|-----|-----|---|----|-----|-----|-----|----------|------|
| TcMYB68 | AtMYB113  | 38.53 | 109 | 67  | 2 | 91 | 417 | 10  | 115 | 5.00E-21 | 81.3 |
| TcMYB68 | ATMYB99   | 37.4  | 123 | 70  | 3 | 58 | 405 | 4   | 123 | 1.00E-20 | 80.5 |
| TcMYB68 | AtMYB24   | 33.8  | 142 | 91  | 5 | 91 | 507 | 19  | 154 | 3.00E-20 | 78.6 |
| TcMYB68 | ATMYB3    | 35.19 | 108 | 70  | 1 | 91 | 414 | 22  | 126 | 7.00E-20 | 77.8 |
| TcMYB68 | ATMYB88   | 32.52 | 123 | 83  | 2 | 52 | 420 | 19  | 135 | 1.00E-19 | 79.3 |
| TcMYB68 | AtMYB124  | 32.61 | 138 | 93  | 3 | 7  | 420 | 2   | 130 | 2.00E-19 | 78.6 |
| TcMYB68 | ATMYB78   | 33.58 | 134 | 75  | 3 | 25 | 384 | 8   | 136 | 3.00E-19 | 77.4 |
| TcMYB68 | ATMYB91   | 35.19 | 108 | 70  | 1 | 91 | 414 | 4   | 110 | 2.00E-18 | 75.9 |
| TcMYB69 | AtMYB82   | 88.57 | 35  | 4   | 0 | 1  | 105 | 81  | 115 | 4.00E-19 | 75.9 |
| TcMYB69 | ATMYB5    | 58.46 | 65  | 27  | 1 | 1  | 195 | 92  | 153 | 5.00E-19 | 76.6 |
| TcMYB69 | ATMYB90   | 56.06 | 66  | 23  | 1 | 1  | 180 | 77  | 142 | 2.00E-18 | 75.1 |
| TcMYB69 | ATMYB0    | 74.42 | 43  | 11  | 0 | 1  | 129 | 83  | 125 | 2.00E-18 | 74.7 |
| TcMYB69 | ATMYB23   | 66.67 | 45  | 15  | 0 | 1  | 135 | 81  | 125 | 3.00E-18 | 73.9 |
| TcMYB69 | AtMYB114  | 82.86 | 35  | 6   | 0 | 1  | 105 | 77  | 111 | 4.00E-18 | 71.6 |
| TcMYB69 | ATMYB66   | 76.32 | 38  | 9   | 0 | 1  | 114 | 85  | 122 | 9.00E-18 | 72.4 |
| TcMYB69 | ATMYB3    | 39.47 | 114 | 68  | 2 | 1  | 339 | 81  | 191 | 1.00E-17 | 73.2 |
| TcMYB69 | ATMYB75   | 85.71 | 35  | 5   | 0 | 1  | 105 | 77  | 111 | 1.00E-17 | 72.8 |
| TcMYB69 | AtMYB20   | 32.52 | 163 | 108 | 4 | 1  | 483 | 81  | 241 | 1.00E-17 | 73.2 |
| TcMYB69 | AtMYB6    | 80.56 | 36  | 7   | 0 | 1  | 108 | 81  | 116 | 2.00E-17 | 72   |
| TcMYB69 | AtMYB113  | 82.86 | 35  | 6   | 0 | 1  | 105 | 77  | 111 | 3.00E-17 | 71.6 |
| TcMYB69 | ATMYB4    | 80.56 | 36  | 7   | 0 | 1  | 108 | 81  | 116 | 5.00E-17 | 71.6 |
| TcMYB69 | AtMYB32   | 48.19 | 83  | 26  | 2 | 1  | 198 | 81  | 163 | 8.00E-17 | 70.9 |
| TcMYB69 | AtMYB42   | 35    | 120 | 78  | 2 | 1  | 360 | 81  | 195 | 1.00E-16 | 70.5 |
| TcMYB69 | MYB8      | 75    | 36  | 9   | 0 | 1  | 108 | 81  | 116 | 1.00E-16 | 69.3 |
| TcMYB69 | AtMYB85   | 31.29 | 147 | 91  | 3 | 1  | 411 | 81  | 220 | 1.00E-16 | 70.1 |
| TcMYB69 | MYB7      | 77.78 | 36  | 8   | 0 | 1  | 108 | 81  | 116 | 2.00E-16 | 69.7 |
| TcMYB69 | ATMYB12   | 80.56 | 36  | 7   | 0 | 1  | 108 | 81  | 116 | 3.00E-16 | 70.1 |
| TcMYB69 | AtMYB9    | 80.56 | 36  | 7   | 0 | 1  | 108 | 81  | 116 | 5.00E-16 | 69.3 |
| TcMYB69 | AtMYB107  | 77.78 | 36  | 8   | 0 | 1  | 108 | 81  | 116 | 8.00E-16 | 68.6 |
| TcMYB69 | ATMYB123  | 77.78 | 36  | 8   | 0 | 1  | 108 | 83  | 118 | 9.00E-16 | 67.8 |
| TcMYB69 | ATMYB111  | 70.73 | 41  | 12  | 0 | 1  | 123 | 81  | 121 | 9.00E-16 | 68.6 |
| TcMYB69 | AtMYB49   | 77.78 | 36  | 8   | 0 | 1  | 108 | 81  | 116 | 1.00E-15 | 67.8 |
| TcMYB69 | AtMYB41   | 28.17 | 213 | 108 | 8 | 1  | 504 | 81  | 281 | 3.00E-15 | 66.6 |
| TcMYB69 | ATMYB72   | 64.44 | 45  | 16  | 0 | 4  | 138 | 84  | 128 | 4.00E-15 | 66.2 |
| TcMYB69 | AtMYB53   | 72.22 | 36  | 10  | 0 | 1  | 108 | 81  | 116 | 5.00E-15 | 66.2 |
| TcMYB69 | AtMYB74   | 69.44 | 36  | 11  | 0 | 1  | 108 | 82  | 117 | 7.00E-15 | 65.9 |
| TcMYB69 | ATMYB37   | 34.06 | 138 | 85  | 4 | 13 | 408 | 86  | 207 | 7.00E-15 | 65.9 |
| TcMYB69 | AtMYB17   | 75    | 36  | 9   | 0 | 1  | 108 | 81  | 116 | 8.00E-15 | 65.5 |
| TcMYB69 | ATMYB92   | 72.22 | 36  | 10  | 0 | 1  | 108 | 81  | 116 | 1.00E-14 | 65.5 |
| TcMYB69 | ATMYB102  | 72.22 | 36  | 10  | 0 | 1  | 108 | 81  | 116 | 1.00E-14 | 65.5 |
| TcMYB69 | ATMYB13   | 72.22 | 36  | 10  | 0 | 1  | 108 | 81  | 116 | 1.00E-14 | 64.3 |
| TcMYB69 | ATMYB80   | 72.22 | 36  | 10  | 0 | 4  | 111 | 82  | 117 | 2.00E-14 | 64.7 |
| TcMYB69 | ATMYB46   | 28.79 | 198 | 140 | 6 | 4  | 594 | 88  | 243 | 2.00E-14 | 64.3 |
| TcMYB69 | ATMYB63   | 40.96 | 83  | 49  | 1 | 1  | 249 | 83  | 151 | 2.00E-14 | 64.3 |
| TcMYB69 | ATMYB16   | 75    | 36  | 9   | 0 | 1  | 108 | 81  | 116 | 3.00E-14 | 63.9 |
| TcMYB69 | ATMYB31   | 73.68 | 38  | 10  | 0 | 1  | 114 | 81  | 118 | 3.00E-14 | 63.9 |
| TcMYB69 | ATMYB15   | 69.44 | 36  | 11  | 0 | 1  | 108 | 81  | 116 | 3.00E-14 | 63.5 |
| TcMYB69 | ATMYB61   | 38.37 | 86  | 53  | 1 | 1  | 258 | 81  | 163 | 4.00E-14 | 63.9 |
| TcMYB69 | ATMYB106  | 75    | 36  | 9   | 0 | 1  | 108 | 124 | 159 | 4.00E-14 | 63.9 |
| TcMYB69 | AtMYB43   | 72.22 | 36  | 10  | 0 | 1  | 108 | 81  | 116 | 4.00E-14 | 63.5 |
| TcMYB69 | ATMYB11   | 72.22 | 36  | 10  | 0 | 1  | 108 | 81  | 116 | 5.00E-14 | 63.5 |
| TcMYB69 | ATMYB99   | 29.88 | 164 | 108 | 5 | 1  | 471 | 89  | 234 | 6.00E-14 | 62.4 |
| TcMYB69 | ATMYB14   | 59.52 | 42  | 17  | 0 | 1  | 126 | 81  | 122 | 6.00E-14 | 62.4 |
| TcMYB69 | ATMYB87   | 38.37 | 86  | 53  | 1 | 13 | 270 | 86  | 165 | 7.00E-14 | 62.8 |
| TcMYB69 | ATMYB67   | 26.63 | 169 | 98  | 4 | 1  | 429 | 91  | 257 | 1.00E-13 | 62.4 |
| TcMYB69 | ATMYB94   | 66.67 | 42  | 14  | 0 | 1  | 126 | 81  | 122 | 1.00E-13 | 62.4 |
| TcMYB69 | AtMYB60   | 68.29 | 41  | 13  | 0 | 1  | 123 | 81  | 121 | 1.00E-13 | 62   |
| TcMYB69 | ATMYB71   | 62.79 | 43  | 16  | 0 | 1  | 129 | 87  | 129 | 1.00E-13 | 61.6 |
| TcMYB69 | ATMYB30   | 75    | 36  | 9   | 0 | 1  | 108 | 81  | 116 | 1.00E-13 | 62   |
| TcMYB69 | ATMYB96   | 75    | 36  | 9   | 0 | 1  | 108 | 81  | 116 | 2.00E-13 | 62   |
| TcMYB69 | ATMYB58   | 58.54 | 41  | 17  | 0 | 1  | 123 | 83  | 123 | 2.00E-13 | 61.2 |
| TcMYB69 | AtMYB51   | 69.44 | 36  | 11  | 0 | 1  | 108 | 82  | 117 | 2.00E-13 | 61.6 |
| TcMYB69 | AtMYB93   | 69.44 | 36  | 11  | 0 | 1  | 108 | 81  | 116 | 2.00E-13 | 61.6 |
| TcMYB69 | AtMYB79   | 60.47 | 43  | 17  | 0 | 1  | 129 | 75  | 117 | 2.00E-13 | 60.8 |
| TcMYB69 | AtMYB76   | 35.35 | 99  | 59  | 3 | 1  | 282 | 81  | 178 | 3.00E-13 | 61.2 |
| TcMYB69 | AtMYB83   | 59.52 | 42  | 17  | 0 | 1  | 126 | 99  | 140 | 3.00E-13 | 61.2 |
| TcMYB69 | AtMYB27   | 71.43 | 35  | 10  | 0 | 1  | 105 | 78  | 112 | 4.00E-13 | 60.1 |
| TcMYB69 | ATMYB55   | 36.78 | 87  | 55  | 1 | 1  | 261 | 93  | 162 | 4.00E-13 | 60.8 |
| TcMYB69 | AtMYB10   | 53.06 | 49  | 20  | 1 | 1  | 138 | 83  | 131 | 5.00E-13 | 59.7 |
| TcMYB69 | ATMYB86   | 72.22 | 36  | 10  | 0 | 1  | 108 | 81  | 116 | 5.00E-13 | 60.5 |
| TcMYB69 | ATMYB26   | 66.67 | 36  | 12  | 0 | 1  | 108 | 90  | 125 | 5.00E-13 | 60.5 |
| TcMYB69 | ATMYB29   | 25.1  | 255 | 164 | 8 | 1  | 684 | 81  | 324 | 7.00E-13 | 60.1 |
| TcMYB69 | ATMYB34   | 47.76 | 67  | 35  | 2 | 1  | 201 | 81  | 144 | 7.00E-13 | 59.7 |
| TcMYB69 | AtMYB50   | 69.44 | 36  | 11  | 0 | 1  | 108 | 81  | 116 | 8.00E-13 | 59.7 |
| TcMYB69 | ATMYB59-3 | 68.57 | 35  | 11  | 0 | 1  | 105 | 77  | 111 | 9.00E-13 | 58.9 |
| TcMYB69 | ATMYB28   | 42.47 | 73  | 42  | 1 | 1  | 219 | 81  | 150 | 1.00E-12 | 59.7 |
| TcMYB69 | AtMYB103  | 66.67 | 36  | 12  | 0 | 1  | 108 | 81  | 116 | 1.00E-12 | 59.7 |
| TcMYB69 | ATMYB48   | 68.57 | 35  | 11  | 0 | 1  | 105 | 76  | 110 | 1.00E-12 | 58.9 |
| TcMYB69 | AtMYB45   | 37.63 | 93  | 57  | 2 | 1  | 276 | 87  | 176 | 1.00E-12 | 58.9 |
| TcMYB69 | AtMYB18   | 45.59 | 68  | 37  | 0 | 4  | 207 | 80  | 147 | 1.00E-12 | 58.9 |

|         |           |       |     |     |   |    |     |     |     |          |      |
|---------|-----------|-------|-----|-----|---|----|-----|-----|-----|----------|------|
| TcMYB69 | ATMYB84   | 63.89 | 36  | 13  | 0 | 1  | 108 | 82  | 117 | 1.00E-12 | 58.9 |
| TcMYB69 | ATMYB35   | 65.71 | 35  | 12  | 0 | 4  | 108 | 82  | 116 | 2.00E-12 | 58.5 |
| TcMYB69 | ATMYB68   | 71.88 | 32  | 9   | 0 | 13 | 108 | 86  | 117 | 2.00E-12 | 58.5 |
| TcMYB69 | ATMYB95   | 26.04 | 169 | 117 | 3 | 4  | 486 | 82  | 250 | 3.00E-12 | 57.8 |
| TcMYB69 | AtMYB36   | 71.88 | 32  | 9   | 0 | 13 | 108 | 86  | 117 | 3.00E-12 | 58.2 |
| TcMYB69 | ATMYB120  | 66.67 | 36  | 12  | 0 | 1  | 108 | 95  | 130 | 3.00E-12 | 58.5 |
| TcMYB69 | AtMYB97   | 67.65 | 34  | 11  | 0 | 1  | 102 | 88  | 121 | 5.00E-12 | 57.8 |
| TcMYB69 | ATMYB101  | 62.86 | 35  | 13  | 0 | 1  | 105 | 87  | 121 | 5.00E-12 | 57.8 |
| TcMYB69 | ATMYB33   | 62.86 | 35  | 13  | 0 | 1  | 105 | 101 | 135 | 5.00E-12 | 57.8 |
| TcMYB69 | AtMYB81   | 67.65 | 34  | 11  | 0 | 1  | 102 | 89  | 122 | 7.00E-12 | 57.4 |
| TcMYB69 | ATMYB121  | 60    | 40  | 16  | 0 | 1  | 120 | 96  | 135 | 7.00E-12 | 56.6 |
| TcMYB69 | ATMYB65   | 62.86 | 35  | 13  | 0 | 1  | 105 | 110 | 144 | 1.00E-11 | 57   |
| TcMYB69 | ATMYB57   | 52.38 | 42  | 20  | 0 | 1  | 126 | 94  | 135 | 1.00E-11 | 55.5 |
| TcMYB69 | AtMYB19   | 62.86 | 35  | 13  | 0 | 1  | 105 | 81  | 115 | 2.00E-11 | 55.1 |
| TcMYB69 | ATMYB2    | 65.71 | 35  | 12  | 0 | 1  | 105 | 89  | 123 | 2.00E-11 | 55.1 |
| TcMYB69 | AtMYB40   | 61.11 | 36  | 14  | 0 | 1  | 108 | 81  | 116 | 3.00E-11 | 54.7 |
| TcMYB69 | AtMYB116  | 27.93 | 179 | 95  | 8 | 1  | 435 | 87  | 260 | 3.00E-11 | 54.7 |
| TcMYB69 | ATMYB122  | 58.33 | 36  | 15  | 0 | 1  | 108 | 81  | 116 | 4.00E-11 | 54.7 |
| TcMYB69 | ATMYB38   | 68.75 | 32  | 10  | 0 | 13 | 108 | 86  | 117 | 5.00E-11 | 54.3 |
| TcMYB69 | AtMYB24   | 28.8  | 125 | 81  | 3 | 1  | 351 | 86  | 206 | 7.00E-11 | 53.1 |
| TcMYB69 | ATMYB3    | 56.41 | 39  | 17  | 0 | 1  | 117 | 89  | 127 | 8.00E-11 | 53.1 |
| TcMYB69 | AtMYB112  | 64.71 | 34  | 12  | 0 | 1  | 102 | 101 | 134 | 9.00E-11 | 53.1 |
| TcMYB69 | ATMYB110  | 32.91 | 79  | 53  | 1 | 4  | 240 | 134 | 211 | 9.00E-11 | 53.5 |
| TcMYB69 | ATMYB105  | 51.22 | 41  | 20  | 0 | 4  | 126 | 174 | 214 | 1.00E-10 | 53.5 |
| TcMYB69 | ATMYB25   | 39.13 | 69  | 34  | 1 | 10 | 192 | 119 | 187 | 1.00E-10 | 53.1 |
| TcMYB69 | AtMYB62   | 62.86 | 35  | 13  | 0 | 1  | 105 | 88  | 122 | 2.00E-10 | 52.8 |
| TcMYB69 | AtMYB108  | 64.71 | 34  | 12  | 0 | 1  | 102 | 88  | 121 | 2.00E-10 | 52.4 |
| TcMYB69 | AtMYB47   | 54.05 | 37  | 17  | 0 | 1  | 111 | 81  | 117 | 3.00E-10 | 52   |
| TcMYB69 | AtMYB117  | 48.78 | 41  | 21  | 0 | 4  | 126 | 165 | 205 | 5.00E-10 | 51.6 |
| TcMYB69 | ATMYB54   | 30.67 | 75  | 52  | 0 | 4  | 228 | 73  | 147 | 7.00E-10 | 50.4 |
| TcMYB69 | AtMYB1    | 58.82 | 34  | 14  | 0 | 4  | 105 | 122 | 155 | 2.00E-09 | 50.1 |
| TcMYB69 | AtMYB104  | 62.07 | 29  | 11  | 0 | 1  | 87  | 85  | 113 | 3.00E-09 | 49.3 |
| TcMYB69 | AtMYB109  | 58.33 | 36  | 15  | 0 | 4  | 111 | 123 | 158 | 4.00E-09 | 48.9 |
| TcMYB69 | AtMYB98   | 67.86 | 28  | 9   | 0 | 4  | 87  | 284 | 311 | 4.00E-09 | 48.9 |
| TcMYB69 | ATMYB73   | 28.57 | 126 | 82  | 1 | 4  | 357 | 80  | 205 | 5.00E-09 | 48.5 |
| TcMYB69 | ATMYB118  | 67.86 | 28  | 9   | 0 | 4  | 87  | 256 | 283 | 6.00E-09 | 48.5 |
| TcMYB69 | AtMYB100  | 62.07 | 29  | 11  | 0 | 4  | 90  | 93  | 121 | 6.00E-09 | 47.8 |
| TcMYB69 | ATMYB52   | 50    | 34  | 17  | 0 | 4  | 105 | 72  | 105 | 8.00E-09 | 47.4 |
| TcMYB69 | AtMYB56   | 50    | 34  | 17  | 0 | 4  | 105 | 160 | 193 | 1.00E-08 | 47.4 |
| TcMYB69 | AtMYB70   | 58.82 | 34  | 14  | 0 | 4  | 105 | 80  | 113 | 1.00E-08 | 47   |
| TcMYB69 | ATMYB44   | 55.88 | 34  | 15  | 0 | 4  | 105 | 73  | 106 | 2.00E-08 | 46.6 |
| TcMYB69 | AtMYB22   | 27.18 | 103 | 74  | 4 | 1  | 306 | 119 | 209 | 2.00E-08 | 46.2 |
| TcMYB69 | AtMYB115  | 42.86 | 49  | 26  | 1 | 1  | 141 | 224 | 272 | 2.00E-08 | 46.6 |
| TcMYB69 | ATMYB78   | 67.86 | 28  | 9   | 0 | 19 | 102 | 115 | 142 | 3.00E-08 | 46.2 |
| TcMYB69 | ATMYB69   | 44.44 | 45  | 25  | 0 | 4  | 138 | 86  | 130 | 4.00E-08 | 45.4 |
| TcMYB69 | ATMYB77   | 60    | 30  | 12  | 0 | 16 | 105 | 77  | 106 | 8.00E-08 | 44.7 |
| TcMYB69 | ATMYB119  | 60.71 | 28  | 11  | 0 | 4  | 87  | 172 | 199 | 1.00E-07 | 44.7 |
| TcMYB69 | AtMYB64   | 57.14 | 28  | 12  | 0 | 4  | 87  | 172 | 199 | 1.00E-06 | 41.6 |
| TcMYB69 | AtMYB124  | 33.7  | 92  | 47  | 3 | 7  | 240 | 93  | 184 | 1.00E-06 | 41.6 |
| TcMYB69 | ATMYB88   | 50    | 46  | 23  | 1 | 7  | 144 | 98  | 142 | 6.00E-06 | 39.3 |
| TcMYB69 | AtMYB89   | 34.15 | 41  | 27  | 0 | 4  | 126 | 123 | 163 | 3.00E-05 | 36.2 |
| TcMYB70 | ATMYB105  | 78.95 | 38  | 8   | 0 | 1  | 114 | 183 | 220 | 2.00E-15 | 68.2 |
| TcMYB70 | AtMYB117  | 75.68 | 37  | 9   | 0 | 1  | 111 | 174 | 210 | 1.00E-14 | 66.2 |
| TcMYB70 | ATMYB52   | 49.23 | 65  | 17  | 1 | 1  | 147 | 81  | 145 | 1.00E-13 | 62.4 |
| TcMYB70 | ATMYB110  | 28.05 | 164 | 86  | 4 | 1  | 396 | 143 | 297 | 2.00E-12 | 59.3 |
| TcMYB70 | ATMYB54   | 80.65 | 31  | 6   | 0 | 1  | 93  | 82  | 112 | 3.00E-12 | 58.2 |
| TcMYB70 | AtMYB56   | 80.65 | 31  | 6   | 0 | 1  | 93  | 169 | 199 | 5.00E-12 | 58.2 |
| TcMYB70 | ATMYB69   | 88.89 | 27  | 3   | 0 | 4  | 84  | 96  | 122 | 2.00E-10 | 52.8 |
| TcMYB70 | ATMYB48   | 41.82 | 55  | 30  | 1 | 4  | 162 | 87  | 141 | 3.00E-07 | 43.1 |
| TcMYB70 | ATMYB59-3 | 39.62 | 53  | 32  | 0 | 4  | 162 | 88  | 140 | 4.00E-07 | 42.7 |
| TcMYB70 | ATMYB25   | 30.26 | 76  | 53  | 1 | 1  | 228 | 126 | 198 | 6.00E-07 | 42.7 |
| TcMYB70 | AtMYB1    | 61.54 | 26  | 10  | 0 | 1  | 78  | 131 | 156 | 6.00E-07 | 42.7 |
| TcMYB70 | AtMYB89   | 62.07 | 29  | 11  | 0 | 4  | 90  | 133 | 161 | 9.00E-07 | 41.2 |
| TcMYB70 | AtMYB109  | 53.57 | 28  | 13  | 0 | 1  | 84  | 132 | 159 | 4.00E-06 | 40   |
| TcMYB70 | ATMYB119  | 51.35 | 37  | 18  | 1 | 4  | 114 | 182 | 215 | 6.00E-06 | 39.7 |
| TcMYB70 | ATMYB77   | 70.83 | 24  | 7   | 0 | 4  | 75  | 83  | 106 | 7.00E-06 | 39.3 |
| TcMYB70 | ATMYB44   | 70.83 | 24  | 7   | 0 | 4  | 75  | 83  | 106 | 7.00E-06 | 39.3 |
| TcMYB70 | AtMYB36   | 21.88 | 192 | 149 | 7 | 1  | 573 | 92  | 232 | 7.00E-06 | 39.3 |
| TcMYB70 | AtMYB70   | 66.67 | 24  | 8   | 0 | 4  | 75  | 90  | 113 | 9.00E-06 | 38.9 |
| TcMYB70 | ATMYB118  | 31.25 | 80  | 48  | 1 | 4  | 222 | 266 | 345 | 1.00E-05 | 38.9 |
| TcMYB70 | AtMYB22   | 27.03 | 111 | 77  | 4 | 4  | 324 | 130 | 237 | 1.00E-05 | 38.1 |
| TcMYB70 | AtMYB98   | 50    | 28  | 14  | 0 | 4  | 87  | 294 | 321 | 1.00E-05 | 38.5 |
| TcMYB70 | ATMYB73   | 62.5  | 24  | 9   | 0 | 4  | 75  | 90  | 113 | 2.00E-05 | 37.7 |
| TcMYB70 | ATMYB14   | 35.29 | 51  | 33  | 0 | 4  | 156 | 92  | 142 | 2.00E-05 | 37.4 |
| TcMYB70 | ATMYB35   | 62.5  | 24  | 9   | 0 | 4  | 75  | 92  | 115 | 4.00E-05 | 37   |
| TcMYB70 | AtMYB18   | 52    | 25  | 12  | 0 | 4  | 78  | 90  | 114 | 5.00E-05 | 36.6 |
| TcMYB70 | AtMYB64   | 28.44 | 109 | 78  | 3 | 4  | 330 | 182 | 272 | 6.00E-05 | 36.6 |
| TcMYB70 | AtMYB20   | 51.85 | 27  | 13  | 0 | 4  | 84  | 92  | 118 | 6.00E-05 | 36.2 |
| TcMYB70 | AtMYB43   | 51.85 | 27  | 13  | 0 | 4  | 84  | 92  | 118 | 7.00E-05 | 36.2 |
| TcMYB70 | ATMYB0    | 30.65 | 62  | 39  | 1 | 1  | 174 | 93  | 154 | 7.00E-05 | 35.8 |

|         |          |       |     |     |   |   |     |     |     |          |      |
|---------|----------|-------|-----|-----|---|---|-----|-----|-----|----------|------|
| TcMYB70 | AtMYB115 | 29.29 | 99  | 61  | 4 | 4 | 273 | 235 | 330 | 7.00E-05 | 36.2 |
| TcMYB70 | ATMYB123 | 22.48 | 129 | 95  | 3 | 1 | 372 | 93  | 206 | 8.00E-05 | 35.8 |
| TcMYB70 | AtMYB19  | 48    | 25  | 13  | 0 | 4 | 78  | 92  | 116 | 8.00E-05 | 35.8 |
| TcMYB70 | ATMYB66  | 31.75 | 63  | 43  | 1 | 1 | 189 | 95  | 154 | 8.00E-05 | 35.4 |
| TcMYB70 | AtMYB60  | 33.33 | 54  | 36  | 1 | 4 | 165 | 92  | 143 | 8.00E-05 | 35.8 |
| TcMYB70 | ATMYB61  | 23.76 | 202 | 142 | 8 | 4 | 573 | 92  | 264 | 1.00E-04 | 35.8 |
| TcMYB70 | AtMYB103 | 30.51 | 59  | 41  | 0 | 4 | 180 | 92  | 150 | 1.00E-04 | 35.8 |
| TcMYB70 | ATMYB23  | 52    | 25  | 12  | 0 | 1 | 75  | 91  | 115 | 1.00E-04 | 35   |
| TcMYB70 | AtMYB79  | 41.86 | 43  | 25  | 0 | 4 | 132 | 86  | 128 | 1.00E-04 | 35   |
| TcMYB70 | ATMYB71  | 39.53 | 43  | 26  | 0 | 4 | 132 | 98  | 140 | 1.00E-04 | 35   |
| TcMYB70 | AtMYB42  | 33.87 | 62  | 41  | 1 | 4 | 189 | 92  | 149 | 1.00E-04 | 35   |
| TcMYB70 | MYB8     | 48.28 | 29  | 15  | 0 | 1 | 87  | 91  | 119 | 2.00E-04 | 34.7 |
| TcMYB70 | ATMYB12  | 33.33 | 69  | 46  | 1 | 1 | 207 | 91  | 147 | 2.00E-04 | 35   |
| TcMYB70 | AtMYB100 | 31.07 | 103 | 63  | 5 | 4 | 288 | 103 | 202 | 2.00E-04 | 34.7 |
| TcMYB70 | ATMYB3   | 48.28 | 29  | 15  | 0 | 1 | 87  | 91  | 119 | 2.00E-04 | 34.7 |
| TcMYB70 | ATMYB46  | 22.31 | 121 | 81  | 2 | 4 | 327 | 98  | 218 | 2.00E-04 | 34.7 |
| TcMYB70 | AtMYB113 | 36.84 | 57  | 36  | 2 | 1 | 171 | 87  | 138 | 2.00E-04 | 34.3 |
| TcMYB70 | ATMYB90  | 28.72 | 94  | 67  | 3 | 1 | 282 | 87  | 163 | 2.00E-04 | 34.3 |
| TcMYB70 | AtMYB85  | 54.17 | 24  | 11  | 0 | 4 | 75  | 92  | 115 | 3.00E-04 | 34.3 |
| TcMYB70 | AtMYB32  | 33.33 | 54  | 36  | 1 | 1 | 162 | 91  | 140 | 3.00E-04 | 34.3 |
| TcMYB70 | ATMYB4   | 48.28 | 29  | 15  | 0 | 1 | 87  | 91  | 119 | 3.00E-04 | 34.3 |
| TcMYB70 | ATMYB63  | 29.31 | 58  | 41  | 0 | 4 | 177 | 94  | 151 | 3.00E-04 | 34.3 |
| TcMYB70 | ATMYB111 | 41.18 | 34  | 20  | 0 | 1 | 102 | 91  | 124 | 3.00E-04 | 34.3 |
| TcMYB70 | ATMYB68  | 41.94 | 31  | 18  | 0 | 1 | 93  | 92  | 122 | 3.00E-04 | 34.3 |
| TcMYB70 | AtMYB27  | 44.12 | 34  | 19  | 1 | 4 | 105 | 89  | 120 | 3.00E-04 | 33.9 |
| TcMYB70 | AtMYB10  | 48.28 | 29  | 15  | 0 | 4 | 90  | 94  | 122 | 3.00E-04 | 33.9 |
| TcMYB70 | AtMYB45  | 61.11 | 18  | 7   | 0 | 4 | 57  | 98  | 115 | 3.00E-04 | 33.9 |
| TcMYB70 | AtMYB40  | 50    | 26  | 13  | 0 | 4 | 81  | 92  | 117 | 3.00E-04 | 33.9 |
| TcMYB70 | MYB7     | 52    | 25  | 12  | 0 | 1 | 75  | 91  | 115 | 3.00E-04 | 33.9 |
| TcMYB70 | ATMYB84  | 41.94 | 31  | 18  | 0 | 1 | 93  | 92  | 122 | 4.00E-04 | 33.9 |
| TcMYB70 | ATMYB86  | 46.43 | 28  | 15  | 0 | 4 | 87  | 92  | 119 | 4.00E-04 | 33.9 |
| TcMYB70 | AtMYB6   | 52    | 25  | 12  | 0 | 1 | 75  | 91  | 115 | 4.00E-04 | 33.5 |
| TcMYB70 | ATMYB121 | 40.54 | 37  | 22  | 0 | 4 | 114 | 107 | 143 | 5.00E-04 | 33.5 |
| TcMYB70 | ATMYB15  | 30.91 | 55  | 34  | 1 | 4 | 156 | 92  | 146 | 5.00E-04 | 33.5 |
| TcMYB70 | AtMYB82  | 48.28 | 29  | 15  | 0 | 1 | 87  | 91  | 119 | 5.00E-04 | 33.1 |
| TcMYB70 | AtMYB104 | 50    | 30  | 15  | 1 | 4 | 93  | 96  | 122 | 5.00E-04 | 33.5 |
| TcMYB70 | ATMYB75  | 33.33 | 51  | 34  | 0 | 1 | 153 | 87  | 137 | 6.00E-04 | 33.1 |
| TcMYB70 | AtMYB41  | 50    | 24  | 12  | 0 | 4 | 75  | 92  | 115 | 6.00E-04 | 33.1 |
| TcMYB70 | AtMYB62  | 44.44 | 27  | 15  | 0 | 4 | 84  | 99  | 125 | 6.00E-04 | 33.1 |
| TcMYB70 | ATMYB87  | 30    | 50  | 34  | 1 | 1 | 147 | 92  | 141 | 6.00E-04 | 33.1 |
| TcMYB70 | ATMYB80  | 52    | 25  | 12  | 0 | 1 | 75  | 91  | 115 | 7.00E-04 | 33.1 |
| TcMYB70 | ATMYB94  | 26.47 | 68  | 49  | 1 | 4 | 204 | 92  | 159 | 7.00E-04 | 33.1 |
| TcMYB70 | ATMYB11  | 54.17 | 24  | 11  | 0 | 4 | 75  | 92  | 115 | 7.00E-04 | 33.1 |
| TcMYB70 | ATMYB55  | 50    | 28  | 14  | 0 | 4 | 87  | 104 | 131 | 7.00E-04 | 33.1 |
| TcMYB70 | ATMYB5   | 48    | 25  | 13  | 0 | 1 | 75  | 102 | 126 | 8.00E-04 | 32.7 |
| TcMYB70 | ATMYB101 | 50    | 26  | 13  | 0 | 4 | 81  | 98  | 123 | 8.00E-04 | 33.1 |
| TcMYB70 | ATMYB95  | 39.29 | 28  | 17  | 0 | 4 | 87  | 92  | 119 | 8.00E-04 | 32.7 |
| TcMYB70 | ATMYB58  | 38.71 | 31  | 19  | 0 | 4 | 96  | 94  | 124 | 8.00E-04 | 32.7 |
| TcMYB70 | AtMYB116 | 30.95 | 42  | 29  | 0 | 4 | 129 | 98  | 139 | 8.00E-04 | 32.7 |
| TcMYB70 | AtMYB53  | 52    | 25  | 12  | 0 | 1 | 75  | 91  | 115 | 9.00E-04 | 32.7 |
| TcMYB71 | ATMYB5   | 53.85 | 65  | 27  | 1 | 1 | 186 | 107 | 171 | 4.00E-17 | 71.6 |
| TcMYB71 | AtMYB20  | 66.67 | 42  | 14  | 0 | 1 | 126 | 96  | 137 | 3.00E-16 | 69.7 |
| TcMYB71 | ATMYB28  | 27.73 | 220 | 159 | 4 | 1 | 660 | 96  | 304 | 3.00E-16 | 70.1 |
| TcMYB71 | ATMYB29  | 28.7  | 230 | 162 | 6 | 1 | 684 | 96  | 282 | 4.00E-16 | 69.7 |
| TcMYB71 | ATMYB4   | 47.89 | 71  | 36  | 2 | 1 | 210 | 96  | 162 | 5.00E-16 | 68.9 |
| TcMYB71 | AtMYB85  | 38.38 | 99  | 53  | 3 | 1 | 273 | 96  | 192 | 5.00E-16 | 68.6 |
| TcMYB71 | AtMYB51  | 32.35 | 136 | 92  | 1 | 1 | 408 | 97  | 231 | 8.00E-16 | 68.9 |
| TcMYB71 | AtMYB32  | 52.94 | 51  | 24  | 0 | 1 | 153 | 96  | 146 | 8.00E-16 | 68.2 |
| TcMYB71 | AtMYB42  | 32.46 | 114 | 77  | 2 | 1 | 342 | 96  | 203 | 1.00E-15 | 67.8 |
| TcMYB71 | AtMYB43  | 53.33 | 60  | 28  | 1 | 1 | 180 | 96  | 151 | 4.00E-15 | 66.6 |
| TcMYB71 | AtMYB50  | 52.54 | 59  | 27  | 1 | 1 | 174 | 96  | 154 | 7.00E-15 | 65.9 |
| TcMYB71 | AtMYB49  | 55.93 | 59  | 20  | 1 | 1 | 159 | 96  | 154 | 7.00E-15 | 65.9 |
| TcMYB71 | ATMYB3   | 59.57 | 47  | 19  | 1 | 1 | 141 | 96  | 138 | 1.00E-14 | 64.7 |
| TcMYB71 | AtMYB17  | 54    | 50  | 21  | 1 | 1 | 144 | 96  | 145 | 2.00E-14 | 64.7 |
| TcMYB71 | ATMYB61  | 41.79 | 67  | 39  | 0 | 1 | 201 | 96  | 162 | 3.00E-14 | 64.3 |
| TcMYB71 | ATMYB67  | 40.79 | 76  | 38  | 1 | 1 | 207 | 106 | 181 | 3.00E-14 | 63.9 |
| TcMYB71 | MYB8     | 44.62 | 65  | 34  | 2 | 1 | 189 | 96  | 159 | 3.00E-14 | 62.8 |
| TcMYB71 | AtMYB107 | 78.79 | 33  | 7   | 0 | 1 | 99  | 96  | 128 | 3.00E-14 | 63.9 |
| TcMYB71 | AtMYB9   | 78.79 | 33  | 7   | 0 | 1 | 99  | 96  | 128 | 4.00E-14 | 63.9 |
| TcMYB71 | AtMYB76  | 44.78 | 67  | 37  | 1 | 1 | 201 | 96  | 161 | 4.00E-14 | 63.9 |
| TcMYB71 | AtMYB6   | 65.71 | 35  | 12  | 0 | 1 | 105 | 96  | 130 | 4.00E-14 | 62.8 |
| TcMYB71 | ATMYB99  | 44.93 | 69  | 35  | 1 | 1 | 198 | 104 | 172 | 6.00E-14 | 62.4 |
| TcMYB71 | ATMYB92  | 75.76 | 33  | 8   | 0 | 1 | 99  | 96  | 128 | 9.00E-14 | 62.8 |
| TcMYB71 | AtMYB53  | 75.76 | 33  | 8   | 0 | 1 | 99  | 96  | 128 | 1.00E-13 | 62.4 |
| TcMYB71 | MYB7     | 65.71 | 35  | 12  | 0 | 1 | 105 | 96  | 130 | 1.00E-13 | 62   |
| TcMYB71 | ATMYB35  | 49.15 | 59  | 23  | 1 | 1 | 156 | 96  | 154 | 2.00E-13 | 61.6 |
| TcMYB71 | ATMYB16  | 75.76 | 33  | 8   | 0 | 1 | 99  | 96  | 128 | 2.00E-13 | 61.6 |
| TcMYB71 | ATMYB80  | 58.7  | 46  | 19  | 0 | 1 | 138 | 96  | 141 | 3.00E-13 | 61.2 |
| TcMYB71 | AtMYB74  | 55.32 | 47  | 21  | 0 | 1 | 141 | 97  | 143 | 3.00E-13 | 61.2 |
| TcMYB71 | ATMYB102 | 55.32 | 47  | 21  | 0 | 1 | 141 | 96  | 142 | 3.00E-13 | 61.2 |

|         |           |       |     |     |   |     |     |     |     |          |      |
|---------|-----------|-------|-----|-----|---|-----|-----|-----|-----|----------|------|
| TcMYB71 | AtMYB40   | 43.1  | 58  | 33  | 0 | 7   | 180 | 98  | 155 | 3.00E-13 | 60.5 |
| TcMYB71 | ATMYB95   | 50.85 | 59  | 26  | 1 | 1   | 168 | 96  | 154 | 7.00E-13 | 59.7 |
| TcMYB71 | AtMYB41   | 69.7  | 33  | 10  | 0 | 1   | 99  | 96  | 128 | 7.00E-13 | 59.7 |
| TcMYB71 | AtMYB93   | 75.76 | 33  | 8   | 0 | 1   | 99  | 96  | 128 | 8.00E-13 | 60.1 |
| TcMYB71 | ATMYB106  | 57.69 | 52  | 22  | 1 | 1   | 156 | 139 | 186 | 8.00E-13 | 60.1 |
| TcMYB71 | ATMYB86   | 73.53 | 34  | 9   | 0 | 1   | 102 | 96  | 129 | 2.00E-12 | 58.9 |
| TcMYB71 | ATMYB34   | 29.08 | 141 | 86  | 3 | 1   | 381 | 96  | 234 | 3.00E-12 | 58.2 |
| TcMYB71 | ATMYB122  | 46.67 | 60  | 31  | 1 | 1   | 177 | 96  | 155 | 6.00E-12 | 57.4 |
| TcMYB71 | AtMYB47   | 42.03 | 69  | 36  | 2 | 1   | 195 | 96  | 163 | 1.00E-11 | 55.8 |
| TcMYB71 | ATMYB55   | 61.9  | 42  | 16  | 0 | 1   | 126 | 108 | 149 | 3.00E-11 | 55.5 |
| TcMYB71 | ATMYB48   | 39.19 | 74  | 45  | 1 | 1   | 222 | 91  | 161 | 3.00E-10 | 51.6 |
| TcMYB71 | ATMYB38   | 51.06 | 47  | 23  | 1 | 1   | 141 | 97  | 142 | 1.00E-09 | 50.4 |
| TcMYB71 | AtMYB10   | 35.96 | 89  | 44  | 2 | 4   | 231 | 99  | 187 | 3.00E-09 | 48.9 |
| TcMYB71 | ATMYB30   | 44.62 | 65  | 33  | 2 | 1   | 186 | 96  | 158 | 3.00E-09 | 49.3 |
| TcMYB71 | ATMYB11   | 31.58 | 114 | 41  | 5 | 1   | 231 | 96  | 209 | 3.00E-09 | 49.3 |
| TcMYB71 | ATMYB0    | 81.82 | 22  | 4   | 0 | 1   | 66  | 98  | 119 | 3.00E-09 | 48.5 |
| TcMYB71 | ATMYB12   | 30.84 | 107 | 65  | 4 | 1   | 294 | 96  | 202 | 4.00E-09 | 48.9 |
| TcMYB71 | ATMYB66   | 45    | 60  | 33  | 2 | 1   | 180 | 100 | 151 | 5.00E-09 | 47.8 |
| TcMYB71 | ATMYB121  | 38.6  | 57  | 35  | 0 | 1   | 171 | 111 | 167 | 6.00E-09 | 48.1 |
| TcMYB71 | ATMYB23   | 85.71 | 21  | 3   | 0 | 1   | 63  | 96  | 116 | 7.00E-09 | 47.4 |
| TcMYB71 | AtMYB82   | 51.16 | 43  | 12  | 1 | 1   | 102 | 96  | 138 | 1.00E-08 | 46.6 |
| TcMYB71 | ATMYB87   | 48.94 | 47  | 24  | 1 | 1   | 141 | 97  | 142 | 1.00E-08 | 47   |
| TcMYB71 | AtMYB36   | 41.94 | 62  | 35  | 2 | 1   | 183 | 97  | 156 | 2.00E-08 | 47   |
| TcMYB71 | ATMYB37   | 41.38 | 58  | 32  | 1 | 1   | 168 | 97  | 154 | 2.00E-08 | 46.6 |
| TcMYB71 | ATMYB111  | 42.86 | 63  | 33  | 3 | 1   | 180 | 96  | 157 | 3.00E-08 | 46.2 |
| TcMYB71 | ATMYB13   | 41.07 | 56  | 33  | 0 | 1   | 168 | 96  | 151 | 4.00E-08 | 45.4 |
| TcMYB71 | AtMYB116  | 34.38 | 64  | 36  | 1 | 1   | 174 | 102 | 165 | 4.00E-08 | 45.4 |
| TcMYB71 | ATMYB84   | 75    | 24  | 6   | 0 | 1   | 72  | 97  | 120 | 5.00E-08 | 45.4 |
| TcMYB71 | AtMYB60   | 63.33 | 30  | 11  | 0 | 1   | 90  | 96  | 125 | 6.00E-08 | 45.1 |
| TcMYB71 | ATMYB120  | 45    | 60  | 33  | 3 | 1   | 180 | 110 | 158 | 6.00E-08 | 45.4 |
| TcMYB71 | ATMYB15   | 41.03 | 78  | 25  | 4 | 1   | 171 | 96  | 173 | 8.00E-08 | 44.7 |
| TcMYB71 | AtMYB114  | 80    | 20  | 4   | 0 | 1   | 60  | 92  | 111 | 8.00E-08 | 43.1 |
| TcMYB71 | ATMYB31   | 77.27 | 22  | 5   | 0 | 1   | 66  | 96  | 117 | 9.00E-08 | 44.7 |
| TcMYB71 | ATMYB96   | 41.54 | 65  | 34  | 2 | 1   | 183 | 96  | 150 | 9.00E-08 | 44.7 |
| TcMYB71 | ATMYB68   | 70.83 | 24  | 7   | 0 | 1   | 72  | 97  | 120 | 1.00E-07 | 44.7 |
| TcMYB71 | ATMYB46   | 32.39 | 71  | 48  | 2 | 1   | 213 | 102 | 157 | 1.00E-07 | 44.3 |
| TcMYB71 | ATMYB59-3 | 41.38 | 58  | 34  | 2 | 1   | 174 | 92  | 140 | 1.00E-07 | 43.9 |
| TcMYB71 | ATMYB63   | 38.96 | 77  | 44  | 3 | 1   | 222 | 98  | 171 | 1.00E-07 | 43.9 |
| TcMYB71 | ATMYB72   | 39.66 | 58  | 35  | 1 | 1   | 174 | 98  | 149 | 1.00E-07 | 43.9 |
| TcMYB71 | AtMYB83   | 32.22 | 90  | 60  | 3 | 1   | 267 | 114 | 184 | 2.00E-07 | 43.9 |
| TcMYB71 | ATMYB75   | 45.65 | 46  | 24  | 2 | 1   | 135 | 92  | 127 | 2.00E-07 | 43.5 |
| TcMYB71 | ATMYB58   | 33.78 | 74  | 46  | 1 | 1   | 213 | 98  | 171 | 2.00E-07 | 43.5 |
| TcMYB71 | ATMYB94   | 80.95 | 21  | 4   | 0 | 1   | 63  | 96  | 116 | 2.00E-07 | 43.5 |
| TcMYB71 | AtMYB113  | 80    | 20  | 4   | 0 | 1   | 60  | 92  | 111 | 2.00E-07 | 43.1 |
| TcMYB71 | ATMYB90   | 80    | 20  | 4   | 0 | 1   | 60  | 92  | 111 | 2.00E-07 | 43.1 |
| TcMYB71 | AtMYB18   | 25.28 | 178 | 127 | 6 | 1   | 516 | 94  | 246 | 3.00E-07 | 43.1 |
| TcMYB71 | AtMYB103  | 29.63 | 81  | 57  | 1 | 1   | 243 | 96  | 171 | 4.00E-07 | 42.7 |
| TcMYB71 | AtMYB79   | 80    | 20  | 4   | 0 | 1   | 60  | 90  | 109 | 4.00E-07 | 42.4 |
| TcMYB71 | ATMYB71   | 80    | 20  | 4   | 0 | 1   | 60  | 102 | 121 | 4.00E-07 | 42.4 |
| TcMYB71 | AtMYB27   | 80    | 20  | 4   | 0 | 1   | 60  | 93  | 112 | 7.00E-07 | 41.6 |
| TcMYB71 | ATMYB14   | 76.19 | 21  | 5   | 0 | 1   | 63  | 96  | 116 | 7.00E-07 | 41.6 |
| TcMYB71 | ATMYB26   | 48.57 | 35  | 18  | 0 | 1   | 105 | 105 | 139 | 7.00E-07 | 42   |
| TcMYB71 | AtMYB97   | 38.98 | 59  | 29  | 2 | 1   | 156 | 103 | 160 | 1.00E-06 | 41.2 |
| TcMYB71 | AtMYB19   | 42.55 | 47  | 27  | 2 | 1   | 141 | 96  | 136 | 2.00E-06 | 40.4 |
| TcMYB71 | ATMYB123  | 71.43 | 21  | 6   | 0 | 1   | 63  | 98  | 118 | 2.00E-06 | 40   |
| TcMYB71 | AtMYB24   | 60    | 25  | 10  | 0 | 1   | 75  | 101 | 125 | 3.00E-06 | 39.7 |
| TcMYB71 | ATMYB101  | 70    | 20  | 6   | 0 | 1   | 60  | 102 | 121 | 3.00E-06 | 40   |
| TcMYB71 | ATMYB33   | 70    | 20  | 6   | 0 | 1   | 60  | 116 | 135 | 4.00E-06 | 40   |
| TcMYB71 | ATMYB65   | 70    | 20  | 6   | 0 | 1   | 60  | 125 | 144 | 4.00E-06 | 40   |
| TcMYB71 | AtMYB62   | 50    | 32  | 16  | 0 | 1   | 96  | 103 | 134 | 5.00E-06 | 39.3 |
| TcMYB71 | ATMYB3    | 32.26 | 62  | 42  | 0 | 1   | 186 | 104 | 165 | 5.00E-06 | 38.9 |
| TcMYB71 | AtMYB45   | 32.84 | 67  | 45  | 1 | 1   | 201 | 102 | 166 | 6.00E-06 | 38.9 |
| TcMYB71 | AtMYB112  | 50    | 34  | 15  | 1 | 1   | 96  | 116 | 149 | 1.00E-05 | 38.1 |
| TcMYB71 | AtMYB81   | 73.68 | 19  | 5   | 0 | 1   | 57  | 104 | 122 | 1.00E-05 | 38.5 |
| TcMYB71 | ATMYB2    | 70    | 20  | 6   | 0 | 1   | 60  | 104 | 123 | 1.00E-05 | 38.1 |
| TcMYB71 | ATMYB78   | 73.68 | 19  | 5   | 0 | 1   | 57  | 124 | 142 | 2.00E-05 | 37.7 |
| TcMYB71 | AtMYB108  | 73.68 | 19  | 5   | 0 | 1   | 57  | 103 | 121 | 2.00E-05 | 37.7 |
| TcMYB71 | AtMYB109  | 25.25 | 198 | 112 | 8 | 1   | 486 | 137 | 328 | 2.00E-05 | 37.4 |
| TcMYB71 | ATMYB57   | 27.78 | 72  | 51  | 1 | 1   | 213 | 109 | 180 | 4.00E-05 | 36.2 |
| TcMYB71 | AtMYB56   | 26.09 | 69  | 48  | 2 | 4   | 201 | 175 | 241 | 4.00E-05 | 36.6 |
| TcMYB71 | ATMYB25   | 65    | 20  | 7   | 0 | 1   | 60  | 131 | 150 | 5.00E-05 | 36.2 |
| TcMYB71 | ATMYB105  | 35.56 | 45  | 29  | 1 | 4   | 138 | 189 | 231 | 7.00E-05 | 35.8 |
| TcMYB71 | AtMYB1    | 59.09 | 22  | 9   | 0 | 1   | 66  | 136 | 157 | 1.00E-04 | 35.4 |
| TcMYB71 | AtMYB117  | 30.77 | 52  | 36  | 0 | 4   | 159 | 180 | 231 | 2.00E-04 | 34.3 |
| TcMYB71 | ATMYB73   | 56.52 | 23  | 10  | 0 | 7   | 75  | 96  | 118 | 3.00E-04 | 33.9 |
| TcMYB71 | AtMYB104  | 92.31 | 13  | 1   | 0 | 4   | 42  | 101 | 113 | 4.00E-04 | 33.5 |
| TcMYB71 | AtMYB100  | 73.33 | 15  | 4   | 0 | 1   | 45  | 107 | 121 | 7.00E-04 | 32.3 |
| TcMYB72 | AtMYB98   | 49.64 | 139 | 69  | 1 | 457 | 870 | 181 | 319 | 2.00E-45 | 162  |
| TcMYB72 | AtMYB98   | 37.89 | 95  | 59  | 1 | 406 | 690 | 217 | 310 | 6.00E-18 | 80.1 |
| TcMYB72 | ATMYB119  | 41.67 | 192 | 112 | 3 | 289 | 864 | 24  | 205 | 1.00E-42 | 154  |

|         |          |       |     |     |   |     |      |     |     |          |      |
|---------|----------|-------|-----|-----|---|-----|------|-----|-----|----------|------|
| TcMYB72 | ATMYB119 | 35.29 | 51  | 32  | 1 | 718 | 867  | 105 | 155 | 3.00E-04 | 36.6 |
| TcMYB72 | ATMYB118 | 59.62 | 104 | 42  | 0 | 553 | 864  | 186 | 289 | 4.00E-41 | 150  |
| TcMYB72 | ATMYB118 | 33.98 | 103 | 66  | 2 | 388 | 690  | 181 | 282 | 8.00E-16 | 73.6 |
| TcMYB72 | ATMYB118 | 33.96 | 53  | 34  | 1 | 712 | 867  | 187 | 239 | 4.00E-05 | 39.3 |
| TcMYB72 | AtMYB64  | 55.08 | 118 | 53  | 0 | 511 | 864  | 88  | 205 | 4.00E-41 | 149  |
| TcMYB72 | AtMYB64  | 29.7  | 101 | 71  | 1 | 388 | 690  | 99  | 198 | 3.00E-13 | 65.5 |
| TcMYB72 | AtMYB64  | 24.53 | 106 | 79  | 2 | 553 | 867  | 63  | 155 | 7.00E-04 | 35.4 |
| TcMYB72 | ATMYB73  | 58.49 | 106 | 44  | 0 | 547 | 864  | 8   | 113 | 5.00E-38 | 137  |
| TcMYB72 | ATMYB73  | 33.68 | 95  | 63  | 1 | 406 | 690  | 13  | 106 | 4.00E-15 | 70.1 |
| TcMYB72 | AtMYB1   | 53.77 | 106 | 49  | 0 | 559 | 876  | 54  | 159 | 1.00E-37 | 138  |
| TcMYB72 | AtMYB1   | 35.85 | 106 | 68  | 1 | 373 | 690  | 44  | 148 | 6.00E-18 | 79.7 |
| TcMYB72 | AtMYB115 | 54    | 100 | 46  | 0 | 562 | 861  | 158 | 257 | 7.00E-36 | 132  |
| TcMYB72 | AtMYB115 | 41.05 | 95  | 56  | 1 | 406 | 690  | 158 | 251 | 6.00E-18 | 79.3 |
| TcMYB72 | ATMYB44  | 53.77 | 106 | 49  | 0 | 559 | 876  | 5   | 110 | 7.00E-36 | 131  |
| TcMYB72 | ATMYB44  | 35.79 | 95  | 61  | 1 | 406 | 690  | 6   | 99  | 9.00E-15 | 68.9 |
| TcMYB72 | ATMYB77  | 48.72 | 117 | 60  | 0 | 559 | 909  | 5   | 121 | 1.00E-35 | 130  |
| TcMYB72 | ATMYB77  | 36.84 | 95  | 60  | 1 | 406 | 690  | 6   | 99  | 2.00E-16 | 73.9 |
| TcMYB72 | AtMYB70  | 56.86 | 102 | 44  | 0 | 559 | 864  | 12  | 113 | 2.00E-35 | 130  |
| TcMYB72 | AtMYB70  | 30.36 | 112 | 78  | 1 | 406 | 741  | 13  | 123 | 5.00E-14 | 66.6 |
| TcMYB72 | AtMYB109 | 53.64 | 110 | 51  | 0 | 559 | 888  | 55  | 164 | 6.00E-35 | 130  |
| TcMYB72 | AtMYB109 | 31.75 | 126 | 86  | 2 | 373 | 750  | 45  | 168 | 1.00E-15 | 72.8 |
| TcMYB72 | ATMYB105 | 50.93 | 108 | 53  | 0 | 562 | 885  | 107 | 214 | 2.00E-33 | 125  |
| TcMYB72 | ATMYB105 | 30.21 | 96  | 67  | 1 | 403 | 690  | 106 | 200 | 1.00E-13 | 65.9 |
| TcMYB72 | ATMYB105 | 38    | 50  | 31  | 1 | 397 | 546  | 156 | 204 | 5.00E-05 | 38.9 |
| TcMYB72 | AtMYB100 | 53.61 | 97  | 45  | 0 | 571 | 861  | 29  | 125 | 2.00E-33 | 122  |
| TcMYB72 | AtMYB100 | 35.79 | 95  | 61  | 1 | 406 | 690  | 26  | 119 | 6.00E-15 | 68.2 |
| TcMYB72 | ATMYB69  | 49.52 | 105 | 53  | 0 | 550 | 864  | 15  | 119 | 2.00E-33 | 122  |
| TcMYB72 | ATMYB69  | 36.05 | 86  | 55  | 1 | 406 | 663  | 19  | 103 | 6.00E-15 | 68.6 |
| TcMYB72 | AtMYB56  | 53.47 | 101 | 47  | 0 | 562 | 864  | 93  | 193 | 3.00E-33 | 124  |
| TcMYB72 | AtMYB56  | 28.7  | 108 | 77  | 1 | 367 | 690  | 80  | 186 | 3.00E-13 | 64.7 |
| TcMYB72 | ATMYB54  | 49.5  | 101 | 51  | 0 | 562 | 864  | 6   | 106 | 6.00E-33 | 120  |
| TcMYB72 | ATMYB54  | 32.29 | 96  | 65  | 1 | 403 | 690  | 5   | 99  | 4.00E-15 | 68.9 |
| TcMYB72 | ATMYB54  | 36    | 50  | 32  | 1 | 397 | 546  | 55  | 103 | 6.00E-04 | 35   |
| TcMYB72 | ATMYB110 | 50.93 | 108 | 53  | 0 | 562 | 885  | 67  | 174 | 8.00E-33 | 122  |
| TcMYB72 | ATMYB110 | 29.29 | 99  | 70  | 1 | 394 | 690  | 63  | 160 | 7.00E-12 | 60.1 |
| TcMYB72 | ATMYB25  | 49.15 | 118 | 60  | 0 | 559 | 912  | 49  | 166 | 8.00E-33 | 124  |
| TcMYB72 | ATMYB25  | 32.43 | 111 | 75  | 1 | 370 | 702  | 38  | 147 | 5.00E-15 | 70.5 |
| TcMYB72 | ATMYB52  | 48.51 | 101 | 52  | 0 | 562 | 864  | 5   | 105 | 9.00E-33 | 120  |
| TcMYB72 | ATMYB52  | 33.33 | 96  | 64  | 1 | 403 | 690  | 4   | 98  | 1.00E-15 | 70.5 |
| TcMYB72 | ATMYB52  | 34    | 50  | 33  | 1 | 397 | 546  | 54  | 102 | 5.00E-04 | 35.4 |
| TcMYB72 | AtMYB117 | 53.47 | 101 | 47  | 0 | 562 | 864  | 98  | 198 | 9.00E-33 | 123  |
| TcMYB72 | AtMYB117 | 24.84 | 157 | 118 | 2 | 220 | 690  | 46  | 191 | 8.00E-14 | 66.6 |
| TcMYB72 | AtMYB117 | 40    | 50  | 30  | 1 | 397 | 546  | 147 | 195 | 4.00E-05 | 39.3 |
| TcMYB72 | AtMYB49  | 30.1  | 289 | 184 | 8 | 562 | 1374 | 14  | 291 | 2.00E-31 | 119  |
| TcMYB72 | AtMYB49  | 29.81 | 104 | 72  | 2 | 406 | 714  | 14  | 116 | 6.00E-12 | 60.5 |
| TcMYB72 | AtMYB89  | 48.62 | 109 | 56  | 0 | 565 | 891  | 57  | 165 | 3.00E-31 | 114  |
| TcMYB72 | AtMYB89  | 28.17 | 142 | 101 | 3 | 391 | 813  | 50  | 182 | 2.00E-14 | 65.5 |
| TcMYB72 | ATMYB63  | 48.08 | 104 | 53  | 1 | 562 | 870  | 16  | 119 | 6.00E-30 | 113  |
| TcMYB72 | ATMYB63  | 31.86 | 113 | 76  | 2 | 406 | 741  | 16  | 127 | 3.00E-14 | 67   |
| TcMYB72 | ATMYB95  | 38.62 | 145 | 88  | 1 | 556 | 987  | 12  | 156 | 1.00E-29 | 112  |
| TcMYB72 | AtMYB53  | 47.62 | 105 | 54  | 1 | 556 | 867  | 12  | 116 | 2.00E-29 | 112  |
| TcMYB72 | AtMYB53  | 29.81 | 104 | 72  | 2 | 406 | 714  | 14  | 116 | 1.00E-11 | 59.7 |
| TcMYB72 | ATMYB65  | 49.04 | 104 | 52  | 1 | 556 | 864  | 41  | 144 | 2.00E-29 | 116  |
| TcMYB72 | ATMYB65  | 32.8  | 125 | 70  | 4 | 406 | 738  | 43  | 166 | 1.00E-12 | 63.9 |
| TcMYB72 | ATMYB92  | 48.57 | 105 | 53  | 1 | 556 | 867  | 12  | 116 | 3.00E-29 | 112  |
| TcMYB72 | ATMYB92  | 31.73 | 104 | 70  | 2 | 406 | 714  | 14  | 116 | 2.00E-12 | 62.4 |
| TcMYB72 | AtMYB9   | 47.62 | 105 | 54  | 1 | 556 | 867  | 12  | 116 | 3.00E-29 | 112  |
| TcMYB72 | AtMYB9   | 33.65 | 104 | 68  | 2 | 406 | 714  | 14  | 116 | 1.00E-13 | 65.9 |
| TcMYB72 | ATMYB58  | 46.67 | 105 | 55  | 1 | 562 | 873  | 16  | 120 | 6.00E-29 | 110  |
| TcMYB72 | ATMYB58  | 28.97 | 107 | 75  | 2 | 406 | 723  | 16  | 121 | 2.00E-11 | 58.5 |
| TcMYB72 | ATMYB35  | 47.17 | 106 | 55  | 1 | 553 | 867  | 11  | 116 | 9.00E-29 | 110  |
| TcMYB72 | ATMYB35  | 31.13 | 106 | 72  | 2 | 406 | 720  | 14  | 118 | 1.00E-10 | 56.6 |
| TcMYB72 | ATMYB26  | 35.11 | 188 | 100 | 3 | 562 | 1059 | 14  | 201 | 9.00E-29 | 112  |
| TcMYB72 | ATMYB26  | 26.61 | 124 | 81  | 3 | 391 | 732  | 9   | 127 | 5.00E-09 | 51.6 |
| TcMYB72 | ATMYB67  | 45.28 | 106 | 56  | 2 | 562 | 873  | 24  | 128 | 9.00E-29 | 110  |
| TcMYB72 | ATMYB67  | 29.31 | 116 | 81  | 3 | 391 | 735  | 19  | 129 | 1.00E-10 | 56.6 |
| TcMYB72 | AtMYB27  | 44.76 | 105 | 56  | 2 | 556 | 864  | 9   | 112 | 1.00E-28 | 108  |
| TcMYB72 | AtMYB27  | 34.34 | 99  | 64  | 2 | 406 | 699  | 11  | 108 | 7.00E-14 | 65.1 |
| TcMYB72 | AtMYB22  | 45.63 | 103 | 56  | 1 | 553 | 861  | 51  | 152 | 1.00E-28 | 108  |
| TcMYB72 | AtMYB22  | 37.5  | 96  | 60  | 2 | 403 | 690  | 53  | 146 | 1.00E-15 | 70.5 |
| TcMYB72 | AtMYB22  | 28.3  | 53  | 38  | 0 | 709 | 867  | 51  | 103 | 9.00E-06 | 40.8 |
| TcMYB72 | AtMYB45  | 35.91 | 181 | 113 | 3 | 562 | 1095 | 20  | 193 | 2.00E-28 | 108  |
| TcMYB72 | AtMYB45  | 36.19 | 105 | 66  | 2 | 391 | 702  | 15  | 118 | 2.00E-13 | 63.9 |
| TcMYB72 | AtMYB107 | 46.67 | 105 | 55  | 1 | 556 | 867  | 12  | 116 | 2.00E-28 | 109  |
| TcMYB72 | AtMYB107 | 31.73 | 104 | 70  | 2 | 406 | 714  | 14  | 116 | 8.00E-13 | 63.2 |
| TcMYB72 | ATMYB72  | 42.98 | 114 | 63  | 2 | 562 | 897  | 16  | 128 | 3.00E-28 | 108  |
| TcMYB72 | ATMYB72  | 28.44 | 109 | 77  | 2 | 391 | 714  | 11  | 118 | 4.00E-12 | 60.8 |
| TcMYB72 | AtMYB93  | 41.41 | 128 | 66  | 2 | 556 | 912  | 12  | 139 | 3.00E-28 | 110  |
| TcMYB72 | AtMYB93  | 29.81 | 104 | 72  | 2 | 406 | 714  | 14  | 116 | 8.00E-11 | 57.4 |
| TcMYB72 | ATMYB102 | 48.57 | 105 | 53  | 1 | 556 | 867  | 12  | 116 | 3.00E-28 | 110  |

|         |           |       |     |     |    |     |      |    |     |          |      |
|---------|-----------|-------|-----|-----|----|-----|------|----|-----|----------|------|
| TcMYB72 | ATMYB102  | 30.77 | 104 | 71  | 2  | 406 | 714  | 14 | 116 | 1.00E-11 | 60.1 |
| TcMYB72 | ATMYB33   | 44.83 | 116 | 63  | 2  | 520 | 864  | 23 | 135 | 3.00E-28 | 112  |
| TcMYB72 | ATMYB33   | 32    | 125 | 71  | 4  | 406 | 738  | 34 | 157 | 2.00E-12 | 62.8 |
| TcMYB72 | AtMYB41   | 46.6  | 103 | 54  | 1  | 562 | 867  | 14 | 116 | 3.00E-28 | 108  |
| TcMYB72 | AtMYB41   | 29.81 | 104 | 72  | 2  | 406 | 714  | 14 | 116 | 4.00E-12 | 60.5 |
| TcMYB72 | ATMYB15   | 46.3  | 108 | 57  | 1  | 556 | 876  | 12 | 119 | 4.00E-28 | 108  |
| TcMYB72 | ATMYB15   | 33.33 | 105 | 69  | 2  | 406 | 717  | 14 | 117 | 4.00E-14 | 66.6 |
| TcMYB72 | AtMYB81   | 46.73 | 107 | 56  | 1  | 544 | 861  | 16 | 122 | 5.00E-28 | 110  |
| TcMYB72 | AtMYB81   | 30.69 | 101 | 69  | 2  | 403 | 702  | 21 | 120 | 2.00E-11 | 59.3 |
| TcMYB72 | ATMYB3    | 45.71 | 105 | 56  | 1  | 562 | 873  | 14 | 118 | 7.00E-28 | 106  |
| TcMYB72 | ATMYB3    | 31.43 | 105 | 71  | 2  | 403 | 714  | 13 | 116 | 1.00E-13 | 64.7 |
| TcMYB72 | ATMYB3    | 34.62 | 52  | 34  | 1  | 406 | 561  | 67 | 117 | 6.00E-04 | 35   |
| TcMYB72 | MYB8      | 42.72 | 103 | 58  | 1  | 562 | 867  | 14 | 116 | 8.00E-28 | 105  |
| TcMYB72 | MYB8      | 30.48 | 105 | 72  | 2  | 403 | 714  | 13 | 116 | 6.00E-12 | 58.9 |
| TcMYB72 | ATMYB59-3 | 40    | 110 | 65  | 1  | 538 | 864  | 2  | 111 | 1.00E-27 | 105  |
| TcMYB72 | ATMYB59-3 | 32.43 | 111 | 74  | 2  | 391 | 720  | 5  | 114 | 6.00E-16 | 71.2 |
| TcMYB72 | AtMYB6    | 43.4  | 106 | 59  | 1  | 562 | 876  | 14 | 119 | 2.00E-27 | 104  |
| TcMYB72 | AtMYB6    | 30.19 | 106 | 73  | 2  | 400 | 714  | 12 | 116 | 1.00E-11 | 58.5 |
| TcMYB72 | ATMYB122  | 46.6  | 103 | 54  | 1  | 556 | 861  | 12 | 114 | 3.00E-27 | 106  |
| TcMYB72 | ATMYB122  | 29    | 100 | 70  | 2  | 406 | 702  | 14 | 112 | 2.00E-11 | 58.9 |
| TcMYB72 | AtMYB51   | 28.3  | 311 | 222 | 10 | 556 | 1485 | 13 | 271 | 3.00E-27 | 107  |
| TcMYB72 | AtMYB51   | 29.25 | 106 | 74  | 2  | 406 | 720  | 15 | 119 | 3.00E-12 | 61.6 |
| TcMYB72 | ATMYB14   | 41.82 | 110 | 63  | 1  | 562 | 888  | 14 | 123 | 3.00E-27 | 104  |
| TcMYB72 | ATMYB14   | 30.84 | 107 | 73  | 2  | 406 | 723  | 14 | 119 | 8.00E-15 | 68.2 |
| TcMYB72 | AtMYB74   | 38.35 | 133 | 81  | 2  | 556 | 951  | 13 | 144 | 4.00E-27 | 106  |
| TcMYB72 | AtMYB74   | 30.19 | 106 | 73  | 2  | 406 | 720  | 15 | 119 | 1.00E-11 | 59.7 |
| TcMYB72 | AtMYB18   | 48.54 | 103 | 51  | 2  | 562 | 864  | 12 | 113 | 4.00E-27 | 105  |
| TcMYB72 | AtMYB18   | 31.36 | 118 | 80  | 3  | 397 | 747  | 9  | 120 | 6.00E-12 | 60.1 |
| TcMYB72 | AtMYB50   | 47.17 | 106 | 54  | 2  | 556 | 867  | 12 | 116 | 4.00E-27 | 105  |
| TcMYB72 | AtMYB50   | 29.73 | 111 | 77  | 2  | 391 | 720  | 9  | 118 | 2.00E-10 | 55.5 |
| TcMYB72 | ATMYB48   | 43.14 | 102 | 57  | 1  | 562 | 864  | 9  | 110 | 4.00E-27 | 104  |
| TcMYB72 | ATMYB48   | 33.96 | 106 | 69  | 2  | 406 | 720  | 9  | 113 | 1.00E-15 | 70.9 |
| TcMYB72 | ATMYB86   | 47.17 | 106 | 54  | 2  | 556 | 867  | 12 | 116 | 4.00E-27 | 106  |
| TcMYB72 | ATMYB86   | 27.03 | 111 | 80  | 2  | 391 | 720  | 9  | 118 | 9.00E-10 | 53.9 |
| TcMYB72 | AtMYB32   | 35.06 | 174 | 107 | 4  | 562 | 1065 | 14 | 183 | 4.00E-27 | 104  |
| TcMYB72 | AtMYB32   | 31.13 | 106 | 72  | 2  | 400 | 714  | 12 | 116 | 7.00E-13 | 62.8 |
| TcMYB72 | ATMYB80   | 42.06 | 107 | 61  | 1  | 553 | 870  | 11 | 117 | 5.00E-27 | 105  |
| TcMYB72 | ATMYB80   | 30.19 | 106 | 73  | 3  | 406 | 720  | 14 | 114 | 1.00E-09 | 53.5 |
| TcMYB72 | ATMYB121  | 45.54 | 101 | 54  | 1  | 562 | 861  | 29 | 129 | 5.00E-27 | 104  |
| TcMYB72 | ATMYB121  | 28.66 | 164 | 116 | 2  | 391 | 879  | 24 | 186 | 1.00E-15 | 70.9 |
| TcMYB72 | AtMYB19   | 47.57 | 103 | 52  | 2  | 562 | 864  | 14 | 115 | 5.00E-27 | 104  |
| TcMYB72 | AtMYB19   | 30.19 | 106 | 73  | 2  | 388 | 702  | 8  | 112 | 7.00E-12 | 59.7 |
| TcMYB72 | AtMYB19   | 29.85 | 67  | 46  | 2  | 406 | 603  | 67 | 132 | 4.00E-05 | 38.9 |
| TcMYB72 | ATMYB55   | 44.44 | 117 | 52  | 1  | 556 | 867  | 12 | 128 | 5.00E-27 | 106  |
| TcMYB72 | ATMYB55   | 27.05 | 122 | 76  | 2  | 391 | 717  | 9  | 129 | 4.00E-10 | 55.1 |
| TcMYB72 | ATMYB2    | 42.16 | 102 | 58  | 1  | 562 | 864  | 22 | 123 | 6.00E-27 | 104  |
| TcMYB72 | ATMYB2    | 33.91 | 115 | 75  | 2  | 376 | 717  | 12 | 125 | 4.00E-14 | 66.6 |
| TcMYB72 | ATMYB71   | 44.34 | 106 | 57  | 2  | 562 | 873  | 20 | 124 | 7.00E-27 | 103  |
| TcMYB72 | ATMYB71   | 33.63 | 113 | 74  | 2  | 406 | 741  | 20 | 131 | 2.00E-14 | 67.4 |
| TcMYB72 | AtMYB79   | 45.63 | 103 | 54  | 2  | 562 | 864  | 8  | 109 | 8.00E-27 | 103  |
| TcMYB72 | AtMYB79   | 32.38 | 105 | 70  | 2  | 406 | 717  | 8  | 111 | 2.00E-13 | 64.3 |
| TcMYB72 | ATMYB61   | 48.11 | 106 | 53  | 2  | 556 | 867  | 12 | 116 | 1.00E-26 | 105  |
| TcMYB72 | ATMYB61   | 29.73 | 111 | 77  | 2  | 391 | 720  | 9  | 118 | 8.00E-11 | 57.4 |
| TcMYB72 | MYB7      | 43.81 | 105 | 58  | 1  | 562 | 873  | 14 | 118 | 1.00E-26 | 103  |
| TcMYB72 | MYB7      | 31.43 | 105 | 71  | 2  | 403 | 714  | 13 | 116 | 2.00E-12 | 61.2 |
| TcMYB72 | AtMYB112  | 39.09 | 110 | 66  | 1  | 535 | 861  | 25 | 134 | 1.00E-26 | 102  |
| TcMYB72 | AtMYB112  | 29.52 | 105 | 73  | 2  | 406 | 717  | 34 | 137 | 1.00E-10 | 55.8 |
| TcMYB72 | AtMYB20   | 46.23 | 106 | 55  | 2  | 556 | 867  | 12 | 116 | 2.00E-26 | 103  |
| TcMYB72 | AtMYB20   | 27.36 | 106 | 76  | 2  | 406 | 720  | 14 | 118 | 5.00E-10 | 54.3 |
| TcMYB72 | ATMYB46   | 44.66 | 103 | 56  | 1  | 562 | 867  | 20 | 122 | 2.00E-26 | 102  |
| TcMYB72 | ATMYB46   | 26.36 | 110 | 80  | 2  | 394 | 720  | 16 | 124 | 1.00E-08 | 49.7 |
| TcMYB72 | ATMYB0    | 39.66 | 116 | 69  | 1  | 547 | 891  | 11 | 126 | 2.00E-26 | 101  |
| TcMYB72 | ATMYB0    | 34.58 | 107 | 69  | 2  | 406 | 723  | 16 | 121 | 8.00E-15 | 67.8 |
| TcMYB72 | AtMYB97   | 46.6  | 103 | 54  | 1  | 556 | 861  | 19 | 121 | 3.00E-26 | 105  |
| TcMYB72 | AtMYB97   | 35    | 100 | 64  | 2  | 406 | 702  | 21 | 119 | 3.00E-12 | 62   |
| TcMYB72 | AtMYB103  | 46.6  | 103 | 54  | 1  | 562 | 867  | 14 | 116 | 3.00E-26 | 104  |
| TcMYB72 | AtMYB103  | 27.03 | 111 | 80  | 2  | 391 | 720  | 9  | 118 | 2.00E-10 | 55.8 |
| TcMYB72 | AtMYB43   | 46.23 | 106 | 55  | 2  | 556 | 867  | 12 | 116 | 3.00E-26 | 103  |
| TcMYB72 | AtMYB43   | 28.3  | 106 | 75  | 2  | 406 | 720  | 14 | 118 | 5.00E-10 | 54.7 |
| TcMYB72 | AtMYB85   | 47.12 | 104 | 53  | 2  | 562 | 867  | 14 | 116 | 3.00E-26 | 102  |
| TcMYB72 | AtMYB85   | 28.3  | 106 | 75  | 2  | 406 | 720  | 14 | 118 | 4.00E-10 | 54.3 |
| TcMYB72 | AtMYB17   | 46.3  | 108 | 56  | 2  | 556 | 873  | 12 | 118 | 3.00E-26 | 102  |
| TcMYB72 | AtMYB17   | 28.85 | 104 | 73  | 2  | 406 | 714  | 14 | 116 | 7.00E-12 | 60.1 |
| TcMYB72 | ATMYB13   | 33.33 | 183 | 112 | 5  | 556 | 1074 | 12 | 187 | 4.00E-26 | 101  |
| TcMYB72 | ATMYB13   | 30.77 | 104 | 71  | 2  | 406 | 714  | 14 | 116 | 2.00E-12 | 61.2 |
| TcMYB72 | ATMYB28   | 44.95 | 109 | 59  | 1  | 544 | 867  | 8  | 116 | 6.00E-26 | 103  |
| TcMYB72 | ATMYB28   | 30.77 | 104 | 71  | 2  | 406 | 714  | 14 | 116 | 8.00E-11 | 57.4 |
| TcMYB72 | ATMYB4    | 43.69 | 103 | 57  | 1  | 562 | 867  | 14 | 116 | 6.00E-26 | 101  |
| TcMYB72 | ATMYB4    | 32.08 | 106 | 71  | 2  | 400 | 714  | 12 | 116 | 4.00E-13 | 63.5 |
| TcMYB72 | ATMYB4    | 36.54 | 52  | 33  | 1  | 406 | 561  | 67 | 117 | 4.00E-04 | 35.8 |

|         |          |       |     |     |   |     |      |    |     |          |      |
|---------|----------|-------|-----|-----|---|-----|------|----|-----|----------|------|
| TcMYB72 | AtMYB116 | 41.18 | 102 | 59  | 1 | 562 | 864  | 20 | 121 | 6.00E-26 | 101  |
| TcMYB72 | AtMYB116 | 30.7  | 114 | 78  | 3 | 382 | 720  | 15 | 124 | 2.00E-11 | 58.5 |
| TcMYB72 | ATMYB66  | 41.75 | 103 | 59  | 1 | 562 | 867  | 18 | 120 | 8.00E-26 | 99   |
| TcMYB72 | ATMYB66  | 34.62 | 104 | 67  | 2 | 406 | 714  | 18 | 120 | 6.00E-16 | 70.5 |
| TcMYB72 | AtMYB42  | 46.15 | 104 | 54  | 2 | 562 | 867  | 14 | 116 | 9.00E-26 | 101  |
| TcMYB72 | AtMYB42  | 24.7  | 166 | 108 | 3 | 406 | 852  | 14 | 178 | 2.00E-09 | 52.8 |
| TcMYB72 | ATMYB57  | 40.91 | 110 | 64  | 1 | 535 | 861  | 18 | 127 | 9.00E-26 | 99   |
| TcMYB72 | ATMYB57  | 32.38 | 105 | 70  | 2 | 406 | 717  | 27 | 130 | 2.00E-11 | 57.4 |
| TcMYB72 | AtMYB108 | 41.35 | 104 | 60  | 1 | 553 | 861  | 18 | 121 | 1.00E-25 | 102  |
| TcMYB72 | AtMYB108 | 30.19 | 106 | 73  | 2 | 406 | 720  | 21 | 125 | 8.00E-11 | 57   |
| TcMYB72 | AtMYB10  | 43.27 | 104 | 57  | 2 | 562 | 867  | 16 | 118 | 1.00E-25 | 99.8 |
| TcMYB72 | AtMYB10  | 33.96 | 106 | 69  | 2 | 406 | 720  | 16 | 120 | 2.00E-14 | 67   |
| TcMYB72 | AtMYB24  | 40.78 | 103 | 60  | 1 | 562 | 867  | 19 | 121 | 1.00E-25 | 99   |
| TcMYB72 | AtMYB24  | 32.48 | 117 | 78  | 2 | 373 | 720  | 8  | 123 | 2.00E-12 | 60.1 |
| TcMYB72 | ATMYB16  | 41.9  | 105 | 60  | 1 | 556 | 867  | 12 | 116 | 1.00E-25 | 101  |
| TcMYB72 | ATMYB16  | 27.36 | 106 | 76  | 2 | 406 | 720  | 14 | 118 | 2.00E-10 | 55.8 |
| TcMYB72 | ATMYB101 | 48.57 | 105 | 52  | 2 | 556 | 864  | 18 | 121 | 1.00E-25 | 104  |
| TcMYB72 | ATMYB101 | 34    | 100 | 65  | 2 | 394 | 690  | 16 | 114 | 2.00E-11 | 59.7 |
| TcMYB72 | AtMYB40  | 40.57 | 106 | 61  | 2 | 556 | 867  | 12 | 116 | 2.00E-25 | 99.8 |
| TcMYB72 | AtMYB40  | 32.71 | 107 | 70  | 4 | 406 | 720  | 14 | 114 | 1.00E-08 | 49.7 |
| TcMYB72 | ATMYB29  | 44.86 | 107 | 58  | 1 | 544 | 861  | 8  | 114 | 2.00E-25 | 101  |
| TcMYB72 | ATMYB29  | 32    | 100 | 67  | 2 | 406 | 702  | 14 | 112 | 2.00E-10 | 56.2 |
| TcMYB72 | AtMYB76  | 43.12 | 109 | 61  | 1 | 544 | 867  | 8  | 116 | 3.00E-25 | 100  |
| TcMYB72 | AtMYB76  | 29.91 | 107 | 74  | 2 | 406 | 723  | 14 | 119 | 1.00E-10 | 56.6 |
| TcMYB72 | ATMYB106 | 41.9  | 105 | 60  | 1 | 556 | 867  | 55 | 159 | 4.00E-25 | 101  |
| TcMYB72 | ATMYB106 | 28.3  | 106 | 75  | 2 | 406 | 720  | 57 | 161 | 1.00E-10 | 57   |
| TcMYB72 | ATMYB3   | 40.78 | 103 | 60  | 1 | 562 | 867  | 22 | 124 | 4.00E-25 | 97.8 |
| TcMYB72 | ATMYB3   | 25.99 | 177 | 118 | 4 | 406 | 897  | 22 | 192 | 3.00E-12 | 60.1 |
| TcMYB72 | AtMYB62  | 39.42 | 104 | 62  | 1 | 556 | 864  | 19 | 122 | 4.00E-25 | 99.4 |
| TcMYB72 | AtMYB62  | 31.78 | 107 | 71  | 4 | 406 | 720  | 21 | 125 | 3.00E-12 | 60.8 |
| TcMYB72 | ATMYB123 | 44.76 | 105 | 57  | 1 | 556 | 867  | 14 | 118 | 8.00E-25 | 97.8 |
| TcMYB72 | ATMYB123 | 26.72 | 116 | 84  | 2 | 403 | 747  | 15 | 129 | 5.00E-12 | 60.1 |
| TcMYB72 | ATMYB5   | 40.78 | 103 | 60  | 1 | 562 | 867  | 25 | 127 | 8.00E-25 | 97.4 |
| TcMYB72 | ATMYB5   | 28.7  | 108 | 72  | 3 | 406 | 714  | 25 | 127 | 1.00E-10 | 55.5 |
| TcMYB72 | ATMYB23  | 40.78 | 103 | 60  | 1 | 562 | 867  | 14 | 116 | 1.00E-24 | 96.3 |
| TcMYB72 | ATMYB23  | 33.33 | 111 | 73  | 2 | 385 | 714  | 7  | 116 | 4.00E-16 | 71.2 |
| TcMYB72 | AtMYB83  | 42.06 | 107 | 61  | 1 | 550 | 867  | 28 | 134 | 1.00E-24 | 99.4 |
| TcMYB72 | AtMYB83  | 29.63 | 108 | 75  | 2 | 406 | 726  | 32 | 138 | 3.00E-08 | 48.9 |
| TcMYB72 | ATMYB34  | 43.69 | 103 | 57  | 1 | 562 | 867  | 14 | 116 | 1.00E-24 | 98.2 |
| TcMYB72 | ATMYB34  | 28.3  | 106 | 75  | 2 | 406 | 720  | 14 | 118 | 1.00E-10 | 56.2 |
| TcMYB72 | AtMYB47  | 42.31 | 104 | 59  | 1 | 562 | 870  | 14 | 117 | 1.00E-24 | 97.4 |
| TcMYB72 | AtMYB47  | 23.64 | 110 | 79  | 3 | 406 | 720  | 14 | 118 | 7.00E-08 | 47.4 |
| TcMYB72 | ATMYB96  | 41.82 | 110 | 63  | 1 | 562 | 888  | 14 | 123 | 2.00E-24 | 98.6 |
| TcMYB72 | ATMYB96  | 32.46 | 114 | 76  | 2 | 406 | 744  | 14 | 126 | 6.00E-14 | 67   |
| TcMYB72 | ATMYB96  | 33.87 | 62  | 41  | 1 | 406 | 591  | 67 | 127 | 9.00E-05 | 38.1 |
| TcMYB72 | ATMYB120 | 45.63 | 103 | 55  | 1 | 556 | 861  | 26 | 128 | 2.00E-24 | 100  |
| TcMYB72 | ATMYB120 | 34    | 100 | 65  | 2 | 406 | 702  | 28 | 126 | 7.00E-11 | 58.2 |
| TcMYB72 | AtMYB114 | 42.59 | 108 | 57  | 2 | 556 | 864  | 8  | 111 | 4.00E-24 | 92   |
| TcMYB72 | AtMYB114 | 29.63 | 108 | 75  | 2 | 385 | 705  | 3  | 109 | 1.00E-13 | 62   |
| TcMYB72 | AtMYB36  | 42.99 | 107 | 59  | 2 | 553 | 867  | 11 | 117 | 4.00E-24 | 97.4 |
| TcMYB72 | AtMYB36  | 31.03 | 116 | 78  | 4 | 406 | 747  | 14 | 124 | 4.00E-11 | 58.2 |
| TcMYB72 | ATMYB31  | 43.93 | 107 | 55  | 2 | 562 | 867  | 14 | 116 | 7.00E-24 | 96.7 |
| TcMYB72 | ATMYB31  | 30.77 | 104 | 71  | 2 | 406 | 714  | 14 | 116 | 2.00E-11 | 59.3 |
| TcMYB72 | AtMYB60  | 44.66 | 103 | 56  | 1 | 562 | 867  | 14 | 116 | 1.00E-23 | 95.1 |
| TcMYB72 | AtMYB60  | 28.95 | 152 | 92  | 5 | 406 | 813  | 14 | 160 | 1.00E-13 | 65.1 |
| TcMYB72 | ATMYB94  | 42.72 | 103 | 58  | 1 | 562 | 867  | 14 | 116 | 1.00E-23 | 96.3 |
| TcMYB72 | ATMYB94  | 31.13 | 106 | 72  | 2 | 406 | 720  | 14 | 118 | 7.00E-13 | 63.5 |
| TcMYB72 | AtMYB124 | 39.8  | 98  | 59  | 0 | 571 | 864  | 28 | 125 | 2.00E-23 | 97.1 |
| TcMYB72 | AtMYB124 | 28.7  | 108 | 77  | 1 | 415 | 738  | 28 | 134 | 2.00E-13 | 66.2 |
| TcMYB72 | ATMYB11  | 39.32 | 117 | 70  | 1 | 562 | 909  | 14 | 130 | 2.00E-23 | 95.5 |
| TcMYB72 | ATMYB11  | 30.77 | 104 | 71  | 2 | 406 | 714  | 14 | 116 | 1.00E-10 | 56.6 |
| TcMYB72 | ATMYB30  | 42.72 | 103 | 58  | 1 | 562 | 867  | 14 | 116 | 3.00E-23 | 94.7 |
| TcMYB72 | ATMYB30  | 30.25 | 119 | 78  | 3 | 406 | 747  | 14 | 127 | 1.00E-12 | 62.4 |
| TcMYB72 | ATMYB99  | 43.36 | 113 | 55  | 3 | 556 | 867  | 13 | 124 | 3.00E-23 | 92.8 |
| TcMYB72 | ATMYB99  | 29.73 | 111 | 70  | 4 | 406 | 714  | 15 | 124 | 1.00E-09 | 52.8 |
| TcMYB72 | ATMYB37  | 42.45 | 106 | 59  | 2 | 562 | 873  | 14 | 119 | 3.00E-23 | 94.7 |
| TcMYB72 | ATMYB37  | 33.03 | 109 | 67  | 4 | 406 | 714  | 14 | 117 | 5.00E-11 | 57.8 |
| TcMYB72 | ATMYB75  | 42.59 | 108 | 57  | 2 | 556 | 864  | 8  | 111 | 6.00E-23 | 92   |
| TcMYB72 | ATMYB75  | 29.63 | 108 | 75  | 2 | 385 | 705  | 3  | 109 | 9.00E-13 | 62   |
| TcMYB72 | ATMYB90  | 29.19 | 209 | 143 | 4 | 556 | 1167 | 8  | 198 | 6.00E-23 | 92   |
| TcMYB72 | ATMYB90  | 29.63 | 108 | 75  | 2 | 385 | 705  | 3  | 109 | 4.00E-12 | 60.1 |
| TcMYB72 | ATMYB111 | 40    | 110 | 65  | 1 | 556 | 882  | 12 | 121 | 7.00E-23 | 94   |
| TcMYB72 | ATMYB111 | 32.69 | 104 | 69  | 2 | 406 | 714  | 14 | 116 | 9.00E-12 | 60.1 |
| TcMYB72 | AtMYB82  | 37.8  | 127 | 78  | 1 | 562 | 939  | 14 | 140 | 7.00E-23 | 90.5 |
| TcMYB72 | AtMYB82  | 31.68 | 101 | 68  | 2 | 406 | 705  | 14 | 113 | 8.00E-13 | 61.2 |
| TcMYB72 | ATMYB84  | 42.06 | 107 | 60  | 2 | 553 | 867  | 11 | 117 | 1.00E-22 | 92.8 |
| TcMYB72 | ATMYB84  | 29.55 | 132 | 82  | 5 | 406 | 768  | 14 | 144 | 6.00E-11 | 57.4 |
| TcMYB72 | ATMYB12  | 30.82 | 159 | 109 | 2 | 562 | 1035 | 14 | 165 | 2.00E-22 | 92.8 |
| TcMYB72 | ATMYB12  | 26.73 | 217 | 147 | 7 | 406 | 1020 | 14 | 219 | 4.00E-12 | 61.6 |
| TcMYB72 | ATMYB68  | 41.12 | 107 | 61  | 2 | 553 | 867  | 11 | 117 | 3.00E-22 | 92.8 |

|         |          |       |     |     |   |     |     |    |     |          |      |
|---------|----------|-------|-----|-----|---|-----|-----|----|-----|----------|------|
| TcMYB72 | ATMYB68  | 28.48 | 158 | 104 | 5 | 406 | 852 | 14 | 164 | 8.00E-11 | 57.4 |
| TcMYB72 | ATMYB78  | 34.78 | 115 | 60  | 2 | 562 | 861 | 28 | 142 | 4.00E-22 | 91.3 |
| TcMYB72 | ATMYB78  | 27.73 | 119 | 72  | 2 | 406 | 720 | 28 | 146 | 2.00E-09 | 52.8 |
| TcMYB72 | ATMYB87  | 39.62 | 106 | 62  | 2 | 562 | 873 | 14 | 119 | 4.00E-22 | 90.9 |
| TcMYB72 | ATMYB87  | 33.63 | 113 | 73  | 4 | 406 | 738 | 14 | 121 | 7.00E-12 | 60.1 |
| TcMYB72 | ATMYB88  | 37.76 | 98  | 61  | 0 | 571 | 864 | 33 | 130 | 7.00E-22 | 92.8 |
| TcMYB72 | ATMYB88  | 29.46 | 112 | 79  | 1 | 415 | 750 | 33 | 143 | 9.00E-15 | 70.5 |
| TcMYB72 | AtMYB104 | 40.95 | 105 | 57  | 2 | 562 | 861 | 18 | 118 | 9.00E-22 | 91.3 |
| TcMYB72 | AtMYB104 | 32.67 | 101 | 63  | 3 | 403 | 690 | 17 | 112 | 4.00E-12 | 61.6 |
| TcMYB72 | AtMYB113 | 40.74 | 108 | 59  | 2 | 556 | 864 | 8  | 111 | 3.00E-21 | 87   |
| TcMYB72 | AtMYB113 | 31.68 | 101 | 68  | 2 | 406 | 705 | 10 | 109 | 4.00E-12 | 60.1 |
| TcMYB72 | ATMYB38  | 36.61 | 112 | 69  | 1 | 553 | 882 | 11 | 122 | 1.00E-20 | 86.3 |
| TcMYB72 | ATMYB38  | 31.78 | 107 | 71  | 4 | 406 | 720 | 14 | 115 | 2.00E-09 | 52.4 |
| TcMYB72 | ATMYB91  | 37.23 | 94  | 56  | 1 | 571 | 843 | 7  | 100 | 1.00E-16 | 75.5 |
| TcMYB72 | ATMYB91  | 29.23 | 130 | 89  | 3 | 415 | 795 | 7  | 129 | 6.00E-14 | 67   |
| TcMYB72 | ATMYB91  | 35.71 | 70  | 45  | 3 | 406 | 615 | 59 | 123 | 6.00E-04 | 35.4 |
